# Supplementary material for: Stereoselective synthesis of vinylphosphonates through aromatic aza-Claisen rearrangement of α-aminophosphonates
Source: Royal Society of Chemistry journal article supplement (doi:10.1039/d3cc01669b), 2023-01-01
Supplement: d3cc01669b1.pdf [file d3cc01669b1.pdf]

## Supporting Information

# **Stereoselective Synthesis of Vinyl-phosphonates through Aromatic Aza-Claisen Rearrangement of $\alpha$ -Aminophosphonates**

*Babak Kaboudin, <sup>\*a</sup>Mojtaba Ghashghaee, <sup>a</sup>Haruhiko Fukaya, <sup>b</sup>Hikaru Yanai<sup>\*b</sup>*

<sup>a</sup>Department of Chemistry, Institute for Advanced Studies in Basic Sciences (IASBS), Gava Zang, Zanjan 45137-66731, Iran

<sup>b</sup>School of Pharmacy, Tokyo University of Pharmacy and Life Sciences, 1432-1 Horinouchi, Hachioji, Tokyo 192-0392, Japan

Fax: +98 24 33153220, E-mail: kaboudin@gmail.com

## Table of Contents

|                                                                                 |                 |
|---------------------------------------------------------------------------------|-----------------|
| <b>Experimental details, Table S1 and Characterization data of the products</b> | <b>S10-S40</b>  |
| <b>NMR Spectra for the compounds 1a-1z, 1aa-1dd, 2a-2z, 3dd, 4i</b>             | <b>S41-S212</b> |
| <b>Figure S1: <sup>1</sup>H NMR Spectra of 1a</b>                               |                 |
| <b>Figure S2: <sup>13</sup>C NMR Spectra of 1a</b>                              |                 |
| <b>Figure S3: <sup>31</sup>P NMR Spectra of 1a</b>                              |                 |
| <b>Figure S4: <sup>1</sup>H NMR Spectra of 1b</b>                               |                 |
| <b>Figure S5: <sup>13</sup>C NMR Spectra of 1b</b>                              |                 |
| <b>Figure S6: <sup>31</sup>P NMR Spectra of 1b</b>                              |                 |

**Figure S7:  $^1\text{H}$  NMR Spectra of 1c**  
**Figure S8:  $^{13}\text{C}$  NMR Spectra of 1c**  
**Figure S9:  $^{31}\text{P}$  NMR Spectra of 1c**  
**Figure S10:  $^1\text{H}$  NMR Spectra of 1d**  
**Figure S11:  $^{13}\text{C}$  NMR Spectra of 1d**  
**Figure S12:  $^{31}\text{P}$  NMR Spectra of 1d**  
**Figure S13:  $^1\text{H}$  NMR Spectra of 1e**  
**Figure S14:  $^{13}\text{C}$  NMR Spectra of 1e**  
**Figure S15:  $^{31}\text{P}$  NMR Spectra of 1e**  
**Figure S16:  $^1\text{H}$  NMR Spectra of 1f**  
**Figure S17:  $^{13}\text{C}$  NMR Spectra of 1f**  
**Figure S18:  $^{31}\text{P}$  NMR Spectra of 1f**  
**Figure S19:  $^1\text{H}$  NMR Spectra of 1g**  
**Figure S20:  $^{13}\text{C}$  NMR Spectra of 1g**  
**Figure S21:  $^{31}\text{P}$  NMR Spectra of 1g**  
**Figure S22:  $^1\text{H}$  NMR Spectra of 1h**  
**Figure S23:  $^{13}\text{C}$  NMR Spectra of 1h**  
**Figure S24:  $^{31}\text{P}$  NMR Spectra of 1h**  
**Figure S25:  $^1\text{H}$  NMR Spectra of 1i**  
**Figure S26:  $^{13}\text{C}$  NMR Spectra of 1i**  
**Figure S27:  $^{31}\text{P}$  NMR Spectra of 1i**

**Figure S28:**  $^1\text{H}$  NMR Spectra of 1j  
**Figure S29:**  $^{13}\text{C}$  NMR Spectra of 1j  
**Figure S30:**  $^{31}\text{P}$  NMR Spectra of 1j  
**Figure S31:**  $^1\text{H}$  NMR Spectra of 1k  
**Figure S32:**  $^{13}\text{C}$  NMR Spectra of 1k  
**Figure S33:**  $^{31}\text{P}$  NMR Spectra of 1k  
**Figure S34:**  $^1\text{H}$  NMR Spectra of 1l  
**Figure S35:**  $^{13}\text{C}$  NMR Spectra of 1l  
**Figure S36:**  $^{31}\text{P}$  NMR Spectra of 1l  
**Figure S37:**  $^1\text{H}$  NMR Spectra of 1m  
**Figure S38:**  $^{13}\text{C}$  NMR Spectra of 1m  
**Figure S39:**  $^{31}\text{P}$  NMR Spectra of 1m  
**Figure S40:**  $^1\text{H}$  NMR Spectra of 1n  
**Figure S41:**  $^{13}\text{C}$  NMR Spectra of 1n  
**Figure S42:**  $^{31}\text{P}$  NMR Spectra of 1n  
**Figure S43:**  $^1\text{H}$  NMR Spectra of 1o  
**Figure S44:**  $^{13}\text{C}$  NMR Spectra of 1o  
**Figure S45:**  $^{31}\text{P}$  NMR Spectra of 1o  
**Figure S46:**  $^1\text{H}$  NMR Spectra of 1p  
**Figure S47:**  $^{13}\text{C}$  NMR Spectra of 1p  
**Figure S48:**  $^{31}\text{P}$  NMR Spectra of 1p

**Figure S49:  $^1\text{H}$  NMR Spectra of 1q**  
**Figure S50:  $^{13}\text{C}$  NMR Spectra of 1q**  
**Figure S51:  $^{31}\text{P}$  NMR Spectra of 1q**  
**Figure S52:  $^1\text{H}$  NMR Spectra of 1r**  
**Figure S53:  $^{13}\text{C}$  NMR Spectra of 1r**  
**Figure S54:  $^{31}\text{P}$  NMR Spectra of 1r**  
**Figure S55:  $^1\text{H}$  NMR Spectra of 1s**  
**Figure S56:  $^{13}\text{C}$  NMR Spectra of 1s**  
**Figure S57:  $^{31}\text{P}$  NMR Spectra of 1s**  
**Figure S58:  $^1\text{H}$  NMR Spectra of 1t**  
**Figure S59:  $^{13}\text{C}$  NMR Spectra of 1t**  
**Figure S60:  $^{31}\text{P}$  NMR Spectra of 1t**  
**Figure S61:  $^1\text{H}$  NMR Spectra of 1u**  
**Figure S62:  $^{13}\text{C}$  NMR Spectra of 1u**  
**Figure S63:  $^{31}\text{P}$  NMR Spectra of 1u**  
**Figure S64:  $^1\text{H}$  NMR Spectra of 1v**  
**Figure S65:  $^{13}\text{C}$  NMR Spectra of 1v**  
**Figure S66:  $^{31}\text{P}$  NMR Spectra of 1v**  
**Figure S67:  $^1\text{H}$  NMR Spectra of 1x**  
**Figure S68:  $^{13}\text{C}$  NMR Spectra of 1x**  
**Figure S69:  $^{31}\text{P}$  NMR Spectra of 1x**

**Figure S70:**  $^1\text{H}$  NMR Spectra of 1y  
**Figure S71:**  $^{13}\text{C}$  NMR Spectra of 1y  
**Figure S72:**  $^{31}\text{P}$  NMR Spectra of 1y  
**Figure S73:**  $^1\text{H}$  NMR Spectra of 1z  
**Figure S74:**  $^{13}\text{C}$  NMR Spectra of 1z  
**Figure S75:**  $^{31}\text{P}$  NMR Spectra of 1z  
**Figure S76:**  $^1\text{H}$  NMR Spectra of 1aa  
**Figure S77:**  $^{13}\text{C}$  NMR Spectra of 1aa  
**Figure S78:**  $^{31}\text{P}$  NMR Spectra of 1aa  
**Figure S79:**  $^1\text{H}$  NMR Spectra of 1bb  
**Figure S80:**  $^{13}\text{C}$  NMR Spectra of 1bb  
**Figure S81:**  $^{31}\text{P}$  NMR Spectra of 1bb  
**Figure S82:**  $^1\text{H}$  NMR Spectra of 1cc  
**Figure S83:**  $^{13}\text{C}$  NMR Spectra of 1cc  
**Figure S84:**  $^{31}\text{P}$  NMR Spectra of 1cc  
**Figure S85:**  $^1\text{H}$  NMR Spectra of 1dd  
**Figure S86:**  $^{13}\text{C}$  NMR Spectra of 1dd  
**Figure S87:**  $^{31}\text{P}$  NMR Spectra of 1dd  
**Figure S88:**  $^1\text{H}$  NMR Spectra of 2a  
**Figure S89:**  $^{13}\text{C}$  NMR Spectra of 2a  
**Figure S90:**  $^{31}\text{P}$  NMR Spectra of 2a

**Figure S91:  $^1\text{H}$  NMR Spectra of 2b**  
**Figure S92:  $^{13}\text{C}$  NMR Spectra of 2b**  
**Figure S93:  $^{31}\text{P}$  NMR Spectra of 2b**  
**Figure S94:  $^1\text{H}$  NMR Spectra of 2c**  
**Figure S95:  $^{13}\text{C}$  NMR Spectra of 2c**  
**Figure S96:  $^{31}\text{P}$  NMR Spectra of 2c**  
**Figure S97:  $^1\text{H}$  NMR Spectra of 2d**  
**Figure S98:  $^{13}\text{C}$  NMR Spectra of 2d**  
**Figure S99:  $^{31}\text{P}$  NMR Spectra of 2d**  
**Figure S100:  $^1\text{H}$  NMR Spectra of 2e**  
**Figure S101:  $^{13}\text{C}$  NMR Spectra of 2e**  
**Figure S102:  $^{31}\text{P}$  NMR Spectra of 2e**  
**Figure S103:  $^1\text{H}$  NMR Spectra of 2f**  
**Figure S104:  $^{13}\text{C}$  NMR Spectra of 2f**  
**Figure S105:  $^{31}\text{P}$  NMR Spectra of 2f**  
**Figure S106:  $^1\text{H}$  NMR Spectra of 2g**  
**Figure S107:  $^{13}\text{C}$  NMR Spectra of 2g**  
**Figure S108:  $^{31}\text{P}$  NMR Spectra of 2g**  
**Figure S109:  $^1\text{H}$  NMR Spectra of 2h**  
**Figure S110:  $^{13}\text{C}$  NMR Spectra of 2h**  
**Figure S111:  $^{31}\text{P}$  NMR Spectra of 2h**

**Figure S112:  $^1\text{H}$  NMR Spectra of 2i**

**Figure S113:  $^{13}\text{C}$  NMR Spectra of 2i**

**Figure S114:  $^{31}\text{P}$  NMR Spectra of 2i**

**Figure S115:  $^1\text{H}$  NMR Spectra of 2j**

**Figure S116:  $^{13}\text{C}$  NMR Spectra of 2j**

**Figure S117:  $^{31}\text{P}$  NMR Spectra of 2j**

**Figure S118:  $^1\text{H}$  NMR Spectra of 2k**

**Figure S119:  $^{13}\text{C}$  NMR Spectra of 2k**

**Figure S120:  $^{31}\text{P}$  NMR Spectra of 2k**

**Figure S121:  $^1\text{H}$  NMR Spectra of 2l**

**Figure S122:  $^{13}\text{C}$  NMR Spectra of 2l**

**Figure S123:  $^{31}\text{P}$  NMR Spectra of 2l**

**Figure S124:  $^1\text{H}$  NMR Spectra of 2m**

**Figure S125:  $^{13}\text{C}$  NMR Spectra of 2m**

**Figure S126:  $^{31}\text{P}$  NMR Spectra of 2m**

**Figure S127:  $^1\text{H}$  NMR Spectra of 2n**

**Figure S128:  $^{13}\text{C}$  NMR Spectra of 2n**

**Figure S129:  $^{31}\text{P}$  NMR Spectra of 2n**

**Figure S130:  $^1\text{H}$  NMR Spectra of 2o**

**Figure S131:  $^{13}\text{C}$  NMR Spectra of 2o**

**Figure S132:  $^{31}\text{P}$  NMR Spectra of 2o**

**Figure S133:  $^1\text{H}$  NMR Spectra of 2p**

**Figure S134:  $^{13}\text{C}$  NMR Spectra of 2p**

**Figure S135:  $^{31}\text{P}$  NMR Spectra of 2p**

**Figure S136:  $^1\text{H}$  NMR Spectra of 2q**

**Figure S137:  $^{13}\text{C}$  NMR Spectra of 2q**

**Figure S138:  $^{31}\text{P}$  NMR Spectra of 2q**

**Figure S139:  $^1\text{H}$  NMR Spectra of 2r**

**Figure S140:  $^{13}\text{C}$  NMR Spectra of 2r**

**Figure S141:  $^{31}\text{P}$  NMR Spectra of 2r**

**Figure S142:  $^1\text{H}$  NMR Spectra of 2s**

**Figure S143:  $^{13}\text{C}$  NMR Spectra of 2s**

**Figure S144:  $^{31}\text{P}$  NMR Spectra of 2s**

**Figure S145:  $^1\text{H}$  NMR Spectra of 2t**

**Figure S146:  $^{13}\text{C}$  NMR Spectra of 2t**

**Figure S147:  $^{31}\text{P}$  NMR Spectra of 2t**

**Figure S148:  $^1\text{H}$  NMR Spectra of 2u**

**Figure S149:  $^{13}\text{C}$  NMR Spectra of 2u**

**Figure S150:  $^{31}\text{P}$  NMR Spectra of 2u**

**Figure S151:  $^1\text{H}$  NMR Spectra of 2v**

**Figure S152:  $^{13}\text{C}$  NMR Spectra of 2v**

**Figure S153:  $^{31}\text{P}$  NMR Spectra of 2v**



**Figure S154:  $^1\text{H}$  NMR Spectra of 2w**

**Figure S155:  $^{13}\text{C}$  NMR Spectra of 2w**

**Figure S156:  $^{31}\text{P}$  NMR Spectra of 2w**

**Figure S157:  $^1\text{H}$  NMR Spectra of 2x**

**Figure S158:  $^{13}\text{C}$  NMR Spectra of 2x**

**Figure S159:  $^{31}\text{P}$  NMR Spectra of 2x**

**Figure S160:  $^1\text{H}$  NMR Spectra of 2y**

**Figure S161:  $^{13}\text{C}$  NMR Spectra of 2y**

**Figure S162:  $^{31}\text{P}$  NMR Spectra of 2y**

**Figure S163:  $^1\text{H}$  NMR Spectra of 2cc**

**Figure S164:  $^{13}\text{C}$  NMR Spectra of 2cc**

**Figure S165:  $^{31}\text{P}$  NMR Spectra of 2cc**

**Figure S166:  $^1\text{H}$  NMR Spectra of 3dd**

**Figure S167:  $^{13}\text{C}$  NMR Spectra of 3dd**

**Figure S168:  $^{31}\text{P}$  NMR Spectra of 3dd**

**Figure S169:  $^1\text{H}$  NMR Spectra of the reaction mixture of 4i**

**Figure S170:  $^{13}\text{C}$  NMR Spectra of the reaction mixture of 4i**

**Figure S171:  $^{31}\text{P}$  NMR Spectra of the reaction mixture of 4i**

**DFT calculations and Tables**

**S213-S232**

**General:** All chemicals were commercial products. NMR spectra were obtained with a 400 MHz Bruker Avance instrument with the chemical shifts being reported as  $\delta$  ppm and couplings expressed in Hertz. The chemical shift data for each signal on  $^1\text{H}$  NMR are given in units of  $\delta$  relative to  $\text{CHCl}_3$  ( $\delta=7.26$ ) for  $\text{CDCl}_3$  solution. For  $^{13}\text{C}$  NMR spectra, the chemical shifts in  $\text{CDCl}_3$  and DMSO are recorded relative to the  $\text{CDCl}_3$  resonance ( $\delta=77.0$ ) and DMSO resonance ( $\delta=40.45$ ). Silica gel column chromatography was carried out with Silica gel 100 (Merck No. 10184). Merck Silica-gel 60 F254 plates (No. 5744) were used for the preparative TLC. Melting points are uncorrected. X-Ray crystal data was collected by a Bruker SMART APEX II diffractometer. The structure was solved by a direct method using SHLEXS-97 (Scheldrik,1997) and refined with a full matrix least-squares method.

**2n:** Molecular formula=  $\text{C}_{20}\text{H}_{25}\text{ClNO}_3\text{P}$ , MW=393.33, space group= $P-1$ ,  $a=8.617$  (2) Å,  $b=9.976$  (3) Å,  $c=13.012$  (3) Å,  $V=979.49$  (4) Å<sup>3</sup>,  $T=90$  K,  $Z=2$ ,  $D_x=1.335$  Mg/m<sup>3</sup>, ( $\text{Mo-K}_\alpha$ )=0.71073 Å,  $R=0.029$  over independent reflections (5582),  $\alpha=75.004(1)$ ,  $\beta=89.623(1)$ ,  $\gamma=65.828(1)$ . Crystallographic data and structure factors for the single crystal X-ray diffraction analysis reported in this paper have been deposited with the Cambridge Crystallographic Data Center (CCDC) as supplementary publication No. CCDC: 2236285, copies of these data can be obtained, free of charge, upon application to CCDC, 12 Union Road, Cambridge CB2 1EZ, UK [fax:+44(0)-1223-336033 or e-mail: [deposit@ccdc.cam.ac.uk](mailto:deposit@ccdc.cam.ac.uk)].

**2u:** Molecular formula=  $\text{C}_{21}\text{H}_{28}\text{NO}_4\text{P}$ , MW=389.41, space group= $P-1$ ,  $a=9.838$  (2) Å,  $b=9.658$  (3) Å,  $c=10.988$  (3) Å,  $V=1020.13$  (4) Å<sup>3</sup>,  $T=90$  K,  $Z=2$ ,  $D_x=1.268$  Mg/m<sup>3</sup>, ( $\text{Mo-K}_\alpha$ )=0.71073 Å,  $R=0.034$  over independent reflections (5955),  $\alpha=90$ ,  $\beta=102.287$  (1),  $\gamma=90$ . Crystallographic data and structure factors for the single crystal X-ray diffraction analysis reported in this paper have been deposited with the Cambridge Crystallographic Data Center (CCDC) as supplementary publication No. CCDC: 2236286, copies of these data can be obtained, free of charge, upon application to CCDC, 12 Union Road, Cambridge CB2 1EZ, UK [fax:+44(0)-1223-336033 or e-mail: [deposit@ccdc.cam.ac.uk](mailto:deposit@ccdc.cam.ac.uk)].

### General procedure for the synthesis of 1-aminophosphonate 1:

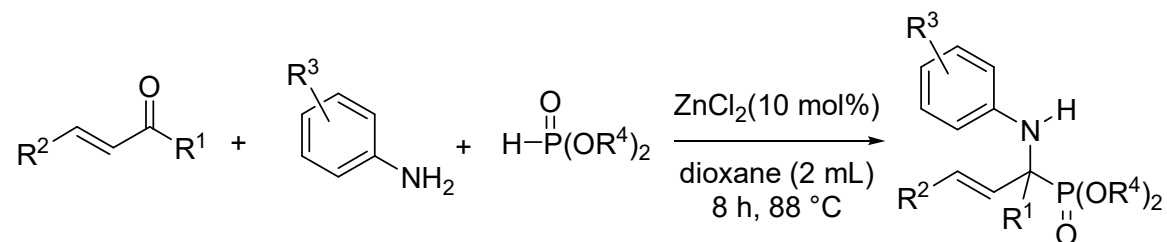

Aldehyde (10 mmol) was added to a mixture of amine (10 mmol) and diethyl phosphite (10 mmol) in dioxane (2 mL).  $ZnCl_2$  (10 mol%) was added to the mixture and the reaction mixture was stirred at 88 °C for 8 h without using any inert gas. The completion of the reaction was monitored by TLC. Ethyl acetate (10 mL) was added to the reaction mixture and the solution was washed with NaOH (5%, 2 x 5 mL) and dried over sodium sulfate. The solvent was evaporated and the crude product was purified by a short column chromatography with *n*-Hexane-EtOAc (5:5) to give compound 1 as the viscous oil or white solid. All products gave satisfactory spectral data in accord with the assigned structures.

### (E)-diethyl (3-phenyl-1-(p-tolylamino)allyl)phosphonate (1a):

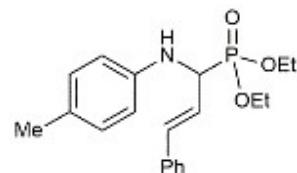

Yellow waxy solid (95%, 341 mg). <sup>1</sup>H NMR (400 MHz, DMSO-*d*<sub>6</sub>)  $\delta$  7.42 – 7.28 (m, 4H), 7.28 – 7.22 (m, 1H), 6.96 – 6.86 (m, 2H), 6.80 – 6.66 (m, 3H), 6.28 (ddd,  $J$  = 16.0, 6.5, 4.8 Hz, 1H), 5.75 (dd,  $J$  = 9.8, 4.9 Hz, 1H), 4.68 (dddd,  $J$  = 24.9, 9.8, 6.4, 1.5 Hz, 1H), 4.18 – 4.00 (m, 4H), 2.15 (s, 3H), 1.22 (dt,  $J$  = 11.6, 7.1 Hz, 6H). <sup>13</sup>C {<sup>1</sup>H} NMR (101 MHz, DMSO-*d*<sub>6</sub>)  $\delta$  145.4 (d,  $J$  = 12.1 Hz), 136.6 (d,  $J$  = 2.0 Hz), 131.9 (d,  $J$  = 12.1 Hz), 129.6, 129.2, 128.1, 126.6, 125.6,

125.0 (d,  $J = 2.0$  Hz), 113.8, 62.9 (d,  $J = 7.0$  Hz), 62.5 (d,  $J = 7.0$  Hz), 52.3 (d,  $J = 155.5$  Hz), 20.5, 16.8 (d,  $J = 5.0$  Hz).  $^{31}\text{P}$   $\{^1\text{H}\}$  NMR (162 MHz, DMSO- $d_6$ )  $\delta$  22.85. HRMS (ESI): Calcd for  $\text{C}_{20}\text{H}_{26}\text{NO}_3\text{NaP}$   $[\text{M} + \text{Na}]^+$ : 382.1548, Found: 382.1543.

**(E)-diisopropyl (3-phenyl-1-(p-tolylamino)allyl)phosphonate (1b):**

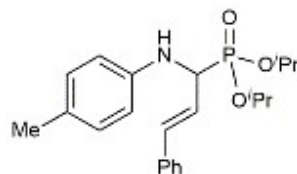

Orange viscous liquid (95%, 367mg).  $^1\text{H}$  NMR (400 MHz, DMSO- $d_6$ )  $\delta$  7.42 – 7.28 (m, 4H), 7.28 – 7.21 (m, 1H), 6.90 (d,  $J = 8.2$  Hz, 2H), 6.80 – 6.67 (m, 3H), 6.27 (ddd,  $J = 16.0, 6.5, 4.9$  Hz, 1H), 5.71 – 5.58 (m, 1H), 4.75 – 4.62 (m, 2H), 4.62 – 4.49 (m, 1H), 2.15 (d,  $J = 3.4$  Hz, 3H), 1.28 (t,  $J = 6.3$  Hz, 6H), 1.24 – 1.15 (m, 6H).  $^{13}\text{C}$   $\{^1\text{H}\}$  NMR (101 MHz, DMSO- $d_6$ )  $\delta$  145.5 (d,  $J = 12.1$  Hz), 136.7 (d,  $J = 3.0$  Hz), 131.8 (d,  $J = 13.1$  Hz), 129.6, 129.1, 128.0, 126.5, 125.6, 125.2, 113.8, 71.4 (d,  $J = 7.0$  Hz), 70.9 (d,  $J = 7.0$  Hz), 52.9 (d,  $J = 156.5$  Hz), 24.4 (d,  $J = 3.0$  Hz), 24.3 (d,  $J = 3.0$  Hz), 24.1 (d,  $J = 5.0$  Hz), 23.9 (d,  $J = 5.0$  Hz), 20.5.  $^{31}\text{P}$   $\{^1\text{H}\}$  NMR (162 MHz, DMSO- $d_6$ )  $\delta$  21.13. HRMS (ESI): Calcd for  $\text{C}_{22}\text{H}_{30}\text{NO}_3\text{NaP}$   $[\text{M} + \text{Na}]^+$ : 410.1861, Found:.

**(E)-diethyl (3-phenyl-1-(phenylamino)allyl)phosphonate (1c):**

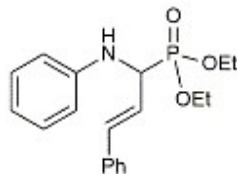

Yellow waxy solid (94%, 324mg).  $^1\text{H}$  NMR (400 MHz, DMSO- $d_6$ )  $\delta$  7.43 – 7.31 (m, 4H), 7.26 (t,  $J = 7.1$  Hz, 1H), 7.15 – 7.03 (m, 2H), 6.89 – 6.79 (m, 2H), 6.73 (ddd,  $J = 16.0, 4.9, 1.4$  Hz, 1H), 6.59 (tt,  $J = 7.2, 1.1$  Hz, 1H), 6.28 (ddd,  $J = 16.0, 6.4, 4.8$  Hz, 1H), 5.94 (dd,  $J = 9.6, 4.8$  Hz, 1H), 4.73 (dddd,  $J = 24.7, 9.7, 6.4, 1.5$  Hz, 1H), 4.18 – 3.99 (m, 4H), 1.29 – 1.14 (m, 6H).  $^{13}\text{C}$   $\{^1\text{H}\}$  NMR (101 MHz, DMSO- $d_6$ )  $\delta$  147.7 (d,  $J = 11.1$  Hz), 136.6 (d,  $J = 3.0$  Hz), 132.0 (d,  $J =$

13.1 Hz), 129.2, 129.2, 128.1, 126.6, 124.9 (d,  $J = 3.0$  Hz), 117.2, 113.7, 62.9 (d,  $J = 7.0$  Hz), 62.5 (d,  $J = 7.0$  Hz), 52.1 (d,  $J = 155.5$  Hz), 16.8 (d,  $J = 6.0$  Hz).  $^{31}\text{P}$  { $^1\text{H}$ } NMR (162 MHz, DMSO- $d_6$ )  $\delta$ : 22.70. HRMS (ESI): Calcd for  $\text{C}_{19}\text{H}_{24}\text{NO}_3\text{NaP}$  [ $\text{M} + \text{Na}$ ] $^+$ : 368.1391, Found: 368.1391.

**(E)-diethyl (1-((4-bromophenyl)amino)-3-phenylallyl)phosphonate (1d):**

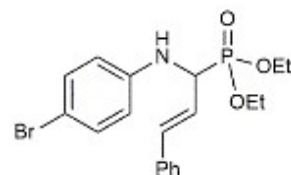

Yellow solid (91%, 384mg, M.P. 115-118 °C).  $^1\text{H}$  NMR (400 MHz, DMSO- $d_6$ )  $\delta$  7.43 – 7.30 (m, 4H), 7.30 – 7.19 (m, 3H), 6.89 – 6.79 (m, 2H), 6.72 (ddd,  $J = 16.0, 4.8, 1.4$  Hz, 1H), 6.34 – 6.21 (m, 2H), 4.74 (dddd,  $J = 24.6, 9.6, 6.3, 1.5$  Hz, 1H), 4.09 (ddqt,  $J = 10.4, 8.7, 7.1, 3.4$  Hz, 4H), 1.29 – 1.15 (m, 6H).  $^{13}\text{C}$  { $^1\text{H}$ } NMR (101 MHz, DMSO- $d_6$ )  $\delta$  147.1 (d,  $J = 10.1$  Hz), 136.5 (d,  $J = 3.0$  Hz), 132.1 (d,  $J = 12.1$  Hz), 131.7, 129.2, 128.2, 126.6, 124.4 (d,  $J = 3.0$  Hz), 115.7, 107.9, 62.9 (d,  $J = 7.0$  Hz), 62.6 (d,  $J = 7.0$  Hz), 52.0 (d,  $J = 154.5$  Hz), 16.8 (d,  $J = 6.0$  Hz).  $^{31}\text{P}$  { $^1\text{H}$ } NMR (162 MHz, DMSO- $d_6$ )  $\delta$  22.35. HRMS (ESI): Calcd for  $\text{C}_{19}\text{H}_{23}\text{NO}_3\text{BrNaP}$  [ $\text{M} + \text{Na}$ ] $^+$ : 446.0497, Found: 446.0493.

**(E)-diethyl (1-((4-chlorophenyl)amino)-3-phenylallyl)phosphonate (1e):**

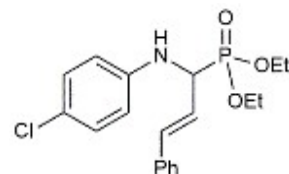

Yellow solid (91%, 344mg, M.P. 108-110 °C).  $^1\text{H}$  NMR (400 MHz, Chloroform- $d$ )  $\delta$  7.38 – 7.28 (m, 3H), 7.23 – 7.12 (m, 3H), 7.10 (dd,  $J = 8.4, 2.5$  Hz, 1H), 6.98 (d,  $J = 2.4$  Hz, 1H), 6.78 (d,  $J = 8.4$  Hz, 1H), 5.60 – 5.47 (m, 1H), 5.20 – 4.45 (m, 3H), 4.15 – 4.08 (m, 4H), 1.33 (td,  $J = 7.1, 2.0$  Hz, 6H).  $^{13}\text{C}$  { $^1\text{H}$ } NMR (101 MHz, DMSO- $d_6$ )  $\delta$  146.7 (d,  $J = 11.1$  Hz), 136.5 (d,  $J = 3.0$  Hz), 132.1 (d,  $J = 12.1$  Hz), 129.2, 128.8, 128.2, 126.6, 124.4 (d,  $J = 3.0$  Hz), 120.5, 115.1, 62.9 (d,  $J = 7.0$  Hz), 62.6 (d,  $J = 7.0$  Hz), 52.1 (d,  $J = 154.5$  Hz), 16.7 (d,  $J = 6.0$  Hz).  $^{31}\text{P}$  { $^1\text{H}$ } NMR (162 MHz, DMSO- $d_6$ )  $\delta$  22.40. HRMS (ESI): Calcd for  $\text{C}_{19}\text{H}_{23}\text{NO}_3\text{ClNaP}$  [ $\text{M} + \text{Na}$ ] $^+$ : 402.1001, Found: 402.0998.

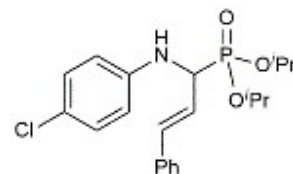

**(E)-diisopropyl (1-((4-chlorophenyl)amino)-3-phenylallyl)phosphonate (1f):** Yellow solid (82%, 333mg, M.P. 98-101 °C).  $^1\text{H}$  NMR (400 MHz,  $\text{DMSO-}d_6$ )  $\delta$  7.41 – 7.30 (m, 4H), 7.25 (t,  $J = 7.0$  Hz, 1H), 7.14 – 7.08 (m, 2H), 6.91 – 6.86 (m, 2H), 6.77 – 6.67 (m, 1H), 6.27 (ddd,  $J = 16.0, 6.4, 4.8$  Hz, 1H), 6.20 (dd,  $J = 9.6, 4.9$  Hz, 1H), 4.75 – 4.57 (m, 3H), 1.28 (dd,  $J = 7.7, 6.1$  Hz, 6H), 1.19 (dd,  $J = 26.9, 6.2$  Hz, 6H).  $^{13}\text{C}$   $\{^1\text{H}\}$  NMR (101 MHz,  $\text{DMSO-}d_6$ )  $\delta$  146.9 (d,  $J = 11.1$  Hz), 136.6 (d,  $J = 3.0$  Hz), 132.0 (d,  $J = 12.1$  Hz), 129.2, 128.8, 128.1, 126.6, 124.6 (d,  $J = 3.0$  Hz), 120.4, 115.1, 71.4 (d,  $J = 7.0$  Hz), 71.0 (d,  $J = 7.0$  Hz), 52.6 (d,  $J = 157.5$  Hz), 24.4 (d,  $J = 3.0$  Hz), 24.3 (d,  $J = 3.0$  Hz), 24.1 (d,  $J = 5.0$  Hz), 23.9 (d,  $J = 5.0$  Hz).  $^{31}\text{P}$   $\{^1\text{H}\}$  NMR (162 MHz,  $\text{DMSO-}d_6$ )  $\delta$  20.71. HRMS (ESI): Calcd for  $\text{C}_{21}\text{H}_{27}\text{ClNO}_3\text{NaP}$   $[\text{M} + \text{Na}]^+$  : 430.1315, Found: 430.1313.

**(E)-diethyl (1-((4-methoxyphenyl)amino)-3-phenylallyl)phosphonate (1g):**

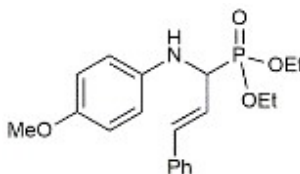

White solid (96%, 360mg, M.P. 108-110 °C).  $^1\text{H}$  NMR (400 MHz,  $\text{DMSO-}d_6$ )  $\delta$  7.42 – 7.30 (m, 4H), 7.30 – 7.21 (m, 1H), 6.85 – 6.76 (m, 2H), 6.76 – 6.66 (m, 3H), 6.26 (ddd,  $J = 16.0, 6.5, 4.8$  Hz, 1H), 5.53 (dd,  $J = 9.8, 5.0$  Hz, 1H), 4.63 (dddd,  $J = 24.9, 9.8, 6.5, 1.5$  Hz, 1H), 4.17 – 3.99 (m, 4H), 3.64 (s, 3H), 1.22 (dt,  $J = 8.4, 7.0$  Hz, 6H).  $^{13}\text{C}$   $\{^1\text{H}\}$  NMR (101 MHz,  $\text{DMSO-}d_6$ )  $\delta$  151.8, 141.7 (d,  $J = 12.1$  Hz), 136.6 (d,  $J = 3.0$  Hz), 132.0 (d,  $J = 12.1$  Hz), 129.1, 128.1, 126.6, 125.2 (d,  $J = 2.0$  Hz), 115.0, 114.8, 62.9 (d,  $J = 7.0$  Hz), 62.5 (d,  $J = 7.0$  Hz), 55.6, 53.0 (d,  $J = 154.5$  Hz), 16.8 (d,  $J = 5.0$  Hz).  $^{31}\text{P}$   $\{^1\text{H}\}$  NMR (162 MHz,  $\text{DMSO-}d_6$ )  $\delta$  22.94. HRMS (ESI): Calcd for  $\text{C}_{20}\text{H}_{26}\text{NO}_4\text{NaP}$   $[\text{M} + \text{Na}]^+$  : 398.1497, Found: 398.1497.

**(E)-diisopropyl (1-((4-methoxyphenyl)amino)-3-phenylallyl)phosphonate (1h):**

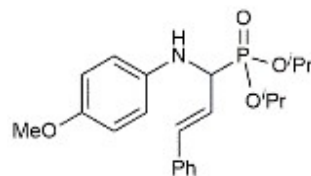

Lemon solid (95%, 383mg, 110-113 °C).  $^1\text{H}$  NMR (400 MHz,  $\text{DMSO-}d_6$ )  $\delta$  7.40 – 7.30 (m, 4H), 7.28 – 7.21 (m, 1H), 6.83 – 6.77 (m, 2H), 6.75 – 6.66 (m, 3H), 6.25 (ddd,  $J = 16.0, 6.5, 4.8$  Hz, 1H), 5.44 (dd,  $J = 9.8, 5.2$  Hz, 1H), 4.67 (ddp,  $J = 15.4, 7.4, 6.2$  Hz, 2H), 4.51 (dddd,  $J = 25.4, 9.8, 6.5, 1.4$  Hz, 1H), 3.64 (s, 3H), 1.32 – 1.15 (m, 12H).  $^{13}\text{C}$   $\{^1\text{H}\}$  NMR (101 MHz,  $\text{DMSO-}d_6$ )  $\delta$  151.7, 141.8 (d,  $J = 13.1$  Hz), 136.7 (d,  $J = 3.0$  Hz), 131.9 (d,  $J = 12.1$  Hz), 129.2, 128.0, 126.5, 125.4, 114.9, 114.7, 71.3 (d,  $J = 7.0$  Hz), 70.8 (d,  $J = 7.0$  Hz), 55.6, 53.5 (d,  $J = 156.5$  Hz), 24.4 (d,  $J = 3.0$  Hz), 24.3 (d,  $J = 4.0$  Hz), 24.1 (d,  $J = 5.0$  Hz), 23.9 (d,  $J = 5.0$  Hz).  $^{31}\text{P}$   $\{^1\text{H}\}$  NMR (162 MHz,  $\text{DMSO-}d_6$ )  $\delta$  21.24. HRMS (ESI): Calcd for  $\text{C}_{22}\text{H}_{30}\text{NO}_4\text{NaP}$   $[\text{M} + \text{Na}]^+$  : 426.1810, Found: 426.1807.

**(E)-diethyl (3-phenyl-1-(o-tolylamino)allyl)phosphonate (1i):**

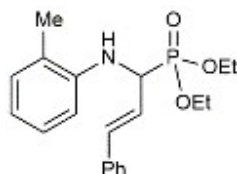

Yellow waxy solid (95%, 341mg).  $^1\text{H}$  NMR (400 MHz,  $\text{DMSO-}d_6$ )  $\delta$  7.43 (dd,  $J = 8.0, 1.4$  Hz, 2H), 7.39 – 7.31 (m, 2H), 7.30 – 7.22 (m, 1H), 7.08 – 6.98 (m, 2H), 6.80 – 6.69 (m, 2H), 6.61 (td,  $J = 7.4, 1.1$  Hz, 1H), 6.36 (ddd,  $J = 16.0, 6.8, 4.8$  Hz, 1H), 4.78 (dddd,  $J = 24.4, 8.5, 6.8, 1.4$  Hz, 1H), 4.52 (dd,  $J = 9.4, 5.9$  Hz, 1H), 4.20 – 4.00 (m, 4H), 2.21 (s, 3H), 1.22 (q,  $J = 7.0$  Hz, 6H).  $^{13}\text{C}$   $\{^1\text{H}\}$  NMR (101 MHz,  $\text{DMSO-}d_6$ )  $\delta$  144.9 (d,  $J = 11.1$  Hz), 136.6 (d,  $J = 4.0$  Hz), 132.1 (d,  $J = 12.1$  Hz), 130.4, 129.1, 128.2, 127.1, 126.7, 124.9 (d,  $J = 3.0$  Hz), 123.2, 117.9, 111.8, 63.0 (d,  $J = 6.0$  Hz), 62.8, (d,  $J = 7.0$  Hz), 52.5 (d,  $J = 153.5$  Hz), 17.8, 16.7 (d,  $J = 6.0$  Hz).  $^{31}\text{P}$   $\{^1\text{H}\}$  NMR (162 MHz,  $\text{DMSO-}d_6$ )  $\delta$  22.80. HRMS (ESI): Calcd for  $\text{C}_{20}\text{H}_{26}\text{NO}_3\text{NaP}$   $[\text{M} + \text{Na}]^+$  : 382.1548, Found: 382.1547.

**(E)-diisopropyl (3-phenyl-1-(o-tolylamino)allyl)phosphonate (1j):**

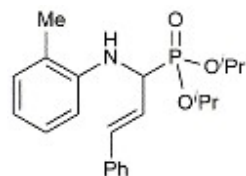

Orange waxy solid (93%, 360mg).  $^1\text{H}$  NMR (400 MHz,  $\text{DMSO-}d_6$ )  $\delta$  7.42 (d,  $J = 7.2$  Hz, 2H), 7.34 (t,  $J = 7.6$  Hz, 2H), 7.28 – 7.22 (m, 1H), 7.08 – 6.98 (m, 2H), 6.78 – 6.70 (m, 2H), 6.61 (td,  $J = 7.3, 1.1$  Hz, 1H), 6.35 (ddd,  $J = 16.0, 6.6, 4.8$  Hz, 1H), 4.76 – 4.60 (m, 3H), 4.45 (dd,  $J = 9.1, 6.7$  Hz, 1H), 2.22 (s, 3H), 1.32 – 1.17 (m, 12H).  $^{13}\text{C}$   $\{^1\text{H}\}$  NMR (101 MHz,  $\text{DMSO-}d_6$ )  $\delta$  145.0 (d,  $J = 11.1$  Hz), 136.6 (d,  $J = 3.0$  Hz), 132.0 (d,  $J = 12.1$  Hz), 130.4, 129.1, 128.1, 127.2, 126.7, 125.1 (d,  $J = 4.0$  Hz), 122.9, 117.8, 111.6, 71.5 (d,  $J = 7.0$  Hz), 71.2 (d,  $J = 7.0$  Hz), 52.9 (d,  $J = 154.5$  Hz), 24.4 (d,  $J = 4.0$  Hz), 24.3 (d,  $J = 3.0$  Hz), 24.0 (d,  $J = 5.0$  Hz), 23.9 (d,  $J = 5.0$  Hz), 17.7.  $^{31}\text{P}$   $\{^1\text{H}\}$  NMR (162 MHz,  $\text{DMSO-}d_6$ )  $\delta$  20.98. HRMS (ESI): Calcd for  $\text{C}_{22}\text{H}_{30}\text{NO}_3\text{NaP}$   $[\text{M} + \text{Na}]^+$ : 410.1816, Found: .

**(E)-diethyl 1-((2-ethylphenyl)amino)-3-phenylallylphosphonate (1k):**

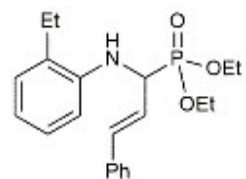

White waxy solid (95%, 354mg).  $^1\text{H}$  NMR (400 MHz,  $\text{DMSO-}d_6$ )  $\delta$  7.42 (d,  $J = 7.3$  Hz, 2H), 7.34 (t,  $J = 7.6$  Hz, 2H), 7.30 – 7.22 (m, 1H), 7.11 – 6.97 (m, 2H), 6.82 – 6.69 (m, 2H), 6.66 (td,  $J = 7.4, 1.1$  Hz, 1H), 6.36 (ddd,  $J = 16.0, 6.7, 4.8$  Hz, 1H), 4.78 (dddd,  $J = 24.3, 8.4, 6.7, 1.4$  Hz, 1H), 4.56 (dd,  $J = 9.1, 6.5$  Hz, 1H), 4.20 – 4.00 (m, 4H), 2.59 (qd,  $J = 7.5, 4.7$  Hz, 2H), 1.32 – 1.14 (m, 9H).  $^{13}\text{C}$   $\{^1\text{H}\}$  NMR (101 MHz,  $\text{DMSO-}d_6$ )  $\delta$  144.2 (d,  $J = 11.1$  Hz), 136.6 (d,  $J = 3.0$  Hz), 132.2 (d,  $J = 13.1$  Hz), 129.1, 128.6, 128.4, 128.2, 127.1, 126.7, 124.9 (d,  $J = 4.0$  Hz), 118.1, 112.0, 62.9 (d,  $J = 7.0$  Hz), 62.8 (d,  $J = 7.0$  Hz), 52.5 (d,  $J = 152.5$  Hz), 23.9, 16.7 (d,  $J = 5.0$  Hz), 13.5.  $^{31}\text{P}$   $\{^1\text{H}\}$  NMR (162 MHz,  $\text{DMSO-}d_6$ )  $\delta$  22.86. HRMS (ESI): Calcd for  $\text{C}_{21}\text{H}_{28}\text{NO}_3\text{NaP}$   $[\text{M} + \text{Na}]^+$ : 396.1704, Found: 396.1700 .



**(E)-diisopropyl (1-((2-ethylphenyl)amino)-3-phenylallyl)phosphonate (1l):**

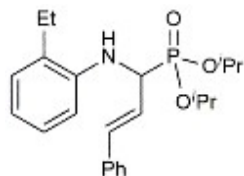

Yellow waxy solid (94%, 377mg).  $^1\text{H}$  NMR (400 MHz,  $\text{DMSO-}d_6$ )  $\delta$  7.41 (d,  $J = 7.3$  Hz, 2H), 7.37 – 7.30 (m, 2H), 7.25 (t,  $J = 7.2$  Hz, 1H), 7.08 – 6.98 (m, 2H), 6.78 – 6.68 (m, 2H), 6.65 (td,  $J = 7.4, 1.1$  Hz, 1H), 6.34 (ddd,  $J = 16.0, 6.6, 4.8$  Hz, 1H), 4.76 – 4.59 (m, 3H), 4.48 (dd,  $J = 8.8, 7.2$  Hz, 1H), 2.58 (qd,  $J = 7.5, 2.4$  Hz, 2H), 1.30 – 1.19 (m, 15H).  $^{13}\text{C}$   $\{^1\text{H}\}$  NMR (101 MHz,  $\text{DMSO-}d_6$ )  $\delta$  144.3 (d,  $J = 11.1$  Hz), 136.6 (d,  $J = 3.0$  Hz), 132.0 (d,  $J = 12.1$  Hz), 129.1, 128.5, 128.4, 128.1, 127.1, 126.7, 125.1 (d,  $J = 4.0$  Hz), 118.0, 111.8, 71.4 (d,  $J = 7.0$  Hz), 71.3 (d,  $J = 7.0$  Hz), 52.8 (d,  $J = 154.5$  Hz), 24.3 (d,  $J = 5.0$  Hz), 24.3 (d,  $J = 5.0$  Hz), 24.0 (d,  $J = 5.0$  Hz), 23.9 (d,  $J = 5.0$  Hz), 13.5.  $^{31}\text{P}$   $\{^1\text{H}\}$  NMR (162 MHz,  $\text{DMSO-}d_6$ )  $\delta$  21.03. HRMS (ESI): Calcd for  $\text{C}_{23}\text{H}_{32}\text{NO}_3\text{NaP}$   $[\text{M} + \text{Na}]^+$  : 424.2017, Found: .

**(E)-diethyl (1-(naphthalen-1-ylamino)-3-phenylallyl)phosphonate (1m):**

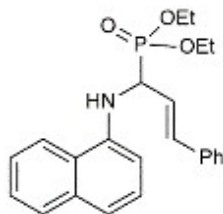

Yellow waxy solid (91%, 359mg).  $^1\text{H}$  NMR (400 MHz,  $\text{DMSO-}d_6$ )  $\delta$  8.33 – 8.25 (m, 1H), 7.86 – 7.79 (m, 1H), 7.53 – 7.46 (m, 2H), 7.43 (d,  $J = 7.2$  Hz, 2H), 7.34 (td,  $J = 7.5, 5.2$  Hz, 3H), 7.29 – 7.22 (m, 2H), 6.91 – 6.81 (m, 2H), 6.51 (ddd,  $J = 16.1, 7.0, 4.9$  Hz, 1H), 5.99 (dd,  $J = 9.0, 4.3$  Hz, 1H), 4.95 (dddd,  $J = 23.2, 8.5, 6.9, 1.3$  Hz, 1H), 4.21 – 4.05 (m, 4H), 1.22 (dt,  $J = 23.1, 7.0$  Hz, 6H).  $^{13}\text{C}$   $\{^1\text{H}\}$  NMR (101 MHz,  $\text{DMSO-}d_6$ )  $\delta$  142.6 (d,  $J = 12.1$  Hz), 136.7 (d,  $J = 3.0$  Hz), 134.5, 132.4 (d,  $J = 12.1$  Hz), 129.1, 128.5, 128.2, 126.9, 126.7, 126.2, 124.9, 124.5 (d,  $J = 3.0$  Hz), 124.1, 122.0, 117.8, 106.3, 63.0 (d,  $J = 7.0$  Hz), 62.7 (d,  $J = 7.0$  Hz), 53.2 (d,  $J = 155.5$  Hz), 16.8 (d,  $J = 5.0$  Hz).  $^{31}\text{P}$   $\{^1\text{H}\}$  NMR (162 MHz,  $\text{DMSO-}d_6$ )  $\delta$  22.47.

**(E)-diethyl (1-((3-chloro-2-methylphenyl)amino)-3-phenylallyl)phosphonate (1n):**

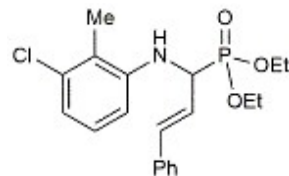

Orange waxy solid (92%, 361mg).  $^1\text{H}$  NMR (400 MHz,  $\text{DMSO-}d_6$ )  $\delta$  7.42 (d,  $J = 7.2$  Hz, 2H), 7.39 – 7.31 (m, 2H), 7.31 – 7.22 (m, 1H), 7.03 (t,  $J = 8.1$  Hz, 1H), 6.85 – 6.69 (m, 3H), 6.37 (ddd,  $J = 16.0, 6.6, 4.8$  Hz, 1H), 4.89 (dd,  $J = 9.4, 4.8$  Hz, 1H), 4.80 (dddd,  $J = 23.7, 9.3, 6.5, 1.4$  Hz, 1H), 4.20 – 4.01 (m, 4H), 2.30 (s, 3H), 1.22 (q,  $J = 7.0$  Hz, 6H).  $^{13}\text{C}$   $\{^1\text{H}\}$  NMR (101 MHz,  $\text{DMSO-}d_6$ )  $\delta$  146.6 (d,  $J = 11.1$  Hz), 136.5 (d,  $J = 4.0$  Hz), 133.9, 132.3 (d,  $J = 12.1$  Hz), 129.1, 128.2, 127.6, 126.7, 124.4 (d,  $J = 4.0$  Hz), 120.9, 118.5, 111.0, 63.0 (d,  $J = 7.0$  Hz), 62.8 (d,  $J = 7.0$  Hz), 52.9 (d,  $J = 153.5$  Hz), 16.7 (d,  $J = 6.0$  Hz), 14.1.  $^{31}\text{P}$   $\{^1\text{H}\}$  NMR (162 MHz,  $\text{DMSO-}d_6$ )  $\delta$  22.37. HRMS (ESI): Calcd for  $\text{C}_{20}\text{H}_{25}\text{ClNO}_3\text{NaP}$   $[\text{M} + \text{Na}]^+$  : 416.1158, Found: 416.1156.

**(E)-diethyl (1-((2,4-dibromophenyl)amino)-3-phenylallyl)phosphonate (1o):**

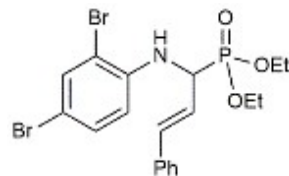

Orange waxy solid (80%, 400mg).  $^1\text{H}$  NMR (400 MHz,  $\text{DMSO-}d_6$ )  $\delta$  7.69 (d,  $J = 2.3$  Hz, 1H), 7.46 – 7.30 (m, 5H), 7.30 – 7.22 (m, 1H), 6.91 (d,  $J = 8.9$  Hz, 1H), 6.69 (ddd,  $J = 16.0, 4.9, 1.2$  Hz, 1H), 6.31 (ddd,  $J = 16.0, 6.6, 4.8$  Hz, 1H), 5.06 (dd,  $J = 9.0, 7.0$  Hz, 1H), 4.94 (dddd,  $J = 24.5, 8.5, 6.5, 1.4$  Hz, 1H), 4.22 – 4.04 (m, 4H), 1.24 (t,  $J = 7.0$  Hz, 6H).  $^{13}\text{C}$   $\{^1\text{H}\}$  NMR (101 MHz,  $\text{DMSO-}d_6$ )  $\delta$  143.1 (d,  $J = 12.1$  Hz), 136.2 (d,  $J = 3.0$  Hz), 134.2, 132.6 (d,  $J = 12.1$  Hz), 131.6, 129.1, 128.4, 126.8, 123.7 (d,  $J = 4.0$  Hz), 115.1, 110.5, 108.9, 63.2 (d,  $J = 6.0$  Hz), 63.1 (d,  $J = 7.0$  Hz), 52.2 (d,  $J = 151.5$  Hz), 16.8 (d,  $J = 5.0$  Hz), 16.7 (d,  $J = 6.0$  Hz).  $^{31}\text{P}$   $\{^1\text{H}\}$  NMR (162 MHz,  $\text{DMSO-}d_6$ )  $\delta$  21.71. HRMS (ESI): Calcd for  $\text{C}_{19}\text{H}_{22}\text{Br}_2\text{NO}_3\text{NaP}$   $[\text{M} + \text{Na}]^+$  : 523.9602, Found: 523.9600.

**(E)-diethyl (1-((3-methoxyphenyl)amino)-3-phenylallyl)phosphonate (1p):**

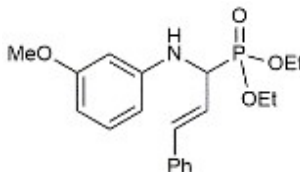

Orange viscous liquid (94%, 352mg).  $^1\text{H}$  NMR (400 MHz,  $\text{DMSO-}d_6$ )  $\delta$  7.43 – 7.30 (m, 4H), 7.29 – 7.22 (m, 1H), 7.04 – 6.96 (m, 1H), 6.75 (ddd,  $J$  = 16.0, 4.9, 1.3 Hz, 1H), 6.51 – 6.40 (m, 2H), 6.29 (ddd,  $J$  = 16.0, 6.5, 4.8 Hz, 1H), 6.23 – 6.16 (m, 1H), 5.98 (dd,  $J$  = 9.6, 4.8 Hz, 1H), 4.74 (dddd,  $J$  = 24.8, 9.6, 6.4, 1.5 Hz, 1H), 4.19 – 4.00 (m, 4H), 3.68 (s, 3H), 1.23 (dt,  $J$  = 9.8, 7.1 Hz, 6H).  $^{13}\text{C}$   $\{^1\text{H}\}$  NMR (101 MHz,  $\text{DMSO-}d_6$ )  $\delta$  160.6, 149.1 (d,  $J$  = 11.1 Hz), 136.6 (d,  $J$  = 3.0 Hz), 131.9 (d,  $J$  = 13.1 Hz), 129.9, 129.2, 128.1, 126.6, 124.9, 106.5, 102.8, 99.6, 62.9 (d,  $J$  = 7.0 Hz), 62.6 (d,  $J$  = 7.0 Hz), 55.1, 52.1 (d,  $J$  = 154.5 Hz), 16.8 (d,  $J$  = 5.0 Hz).  $^{31}\text{P}$   $\{^1\text{H}\}$  NMR (162 MHz,  $\text{DMSO-}d_6$ )  $\delta$  22.66. HRMS (ESI): Calcd for  $\text{C}_{20}\text{H}_{26}\text{NO}_4\text{NaP}$   $[\text{M} + \text{Na}]^+$ : 398.1497, Found: 398.1494.

**(E)-diethyl (1-((3,4-dimethoxyphenyl)amino)-3-phenylallyl)phosphonate (1q):**

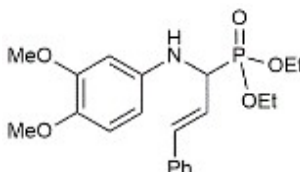

Dark viscous liquid (96%, 388mg).  $^1\text{H}$  NMR (400 MHz,  $\text{DMSO-}d_6$ )  $\delta$  7.42 – 7.30 (m, 4H), 7.28 – 7.22 (m, 1H), 6.80 – 6.68 (m, 2H), 6.64 (d,  $J$  = 2.6 Hz, 1H), 6.36 – 6.22 (m, 2H), 5.54 (dd,  $J$  = 9.7, 5.1 Hz, 1H), 4.68 (dddd,  $J$  = 24.9, 9.7, 6.5, 1.4 Hz, 1H), 4.10 (dddd,  $J$  = 11.7, 7.2, 3.3, 1.7 Hz, 4H), 3.72 (s, 3H), 3.63 (s, 3H), 1.28 – 1.21 (m, 6H).  $^{13}\text{C}$   $\{^1\text{H}\}$  NMR (101 MHz,  $\text{DMSO-}d_6$ )  $\delta$  150.1, 142.6 (d,  $J$  = 12.1 Hz), 141.3, 136.7 (d,  $J$  = 3.0 Hz), 132.0 (d,  $J$  = 12.1 Hz), 129.1, 128.1, 126.6, 125.2 (d,  $J$  = 3.0 Hz), 114.3, 104.4, 100.5, 62.8 (d,  $J$  = 6.0 Hz), 62.5 (d,  $J$  = 7.0 Hz), 56.8, 55.7, 52.9 (d,  $J$  = 154.5 Hz), 16.8 (d,  $J$  = 5.0 Hz), 16.7 (d,  $J$  = 6.0 Hz).  $^{31}\text{P}$   $\{^1\text{H}\}$  NMR (162 MHz,  $\text{DMSO-}d_6$ )  $\delta$  22.95. HRMS (ESI): Calcd for  $\text{C}_{21}\text{H}_{28}\text{NO}_5\text{NaP}$   $[\text{M} + \text{Na}]^+$ : 428.1603, Found: 428.1602.

**(E)-diethyl (1-((3-chloro-4-fluorophenyl)amino)-3-phenylallyl)phosphonate (1r):**

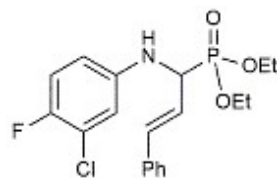

White solid (93%, 369mg, M.P. 110-113 °C).  $^1\text{H}$  NMR (400 MHz,  $\text{DMSO-}d_6$ )  $\delta$  7.43 – 7.31 (m, 4H), 7.31 – 7.22 (m, 1H), 7.13 (t,  $J = 9.1$  Hz, 1H), 7.03 (dd,  $J = 6.4, 2.8$  Hz, 1H), 6.83 (ddd,  $J = 9.1, 3.9, 2.9$  Hz, 1H), 6.73 (ddd,  $J = 16.0, 4.9, 1.4$  Hz, 1H), 6.34 – 6.20 (m, 2H), 4.79 (dddd,  $J = 24.7, 9.8, 6.3, 1.5$  Hz, 1H), 4.18 – 4.00 (m, 4H), 1.22 (dt,  $J = 11.9, 7.0$  Hz, 6H).  $^{13}\text{C}$   $\{^1\text{H}\}$  NMR (101 MHz,  $\text{DMSO-}d_6$ )  $\delta$  148.8 (d,  $J = 236.3$  Hz), 145.3 (d,  $J = 11.1$  Hz), 136.5 (d,  $J = 3.0$  Hz), 132.1 (d,  $J = 12.1$  Hz), 129.2, 128.2, 126.6, 124.3 (d,  $J = 3.0$  Hz), 119.6 (d,  $J = 18.1$  Hz), 117.0 (d,  $J = 21.2$  Hz), 114.2, 113.3 (d,  $J = 6.0$  Hz), 62.9 (d,  $J = 6.0$  Hz), 62.6 (d,  $J = 7.0$  Hz), 52.1 (d,  $J = 154.5$  Hz), 16.7 (d,  $J = 5.0$  Hz).  $^{31}\text{P}$   $\{^1\text{H}\}$  NMR (162 MHz,  $\text{DMSO-}d_6$ )  $\delta$  22.32. HRMS (ESI): Calcd for  $\text{C}_{19}\text{H}_{22}\text{NO}_3\text{FNaPCl}$   $[\text{M} + \text{Na}]^+$  : 420.0908, Found: 420.0905.

**(E)-diethyl (3-phenyl-1-((3,4,5-trimethoxyphenyl)amino)allyl)phosphonate (1s):**

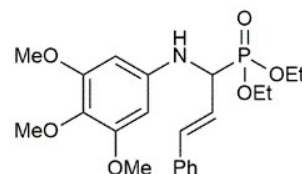

1s

$^1\text{H}$  NMR (400 MHz,  $\text{DMSO-}d_6$ )  $\delta$  7.41 (d,  $J = 7.3$  Hz, 2H), 7.37 – 7.32 (m, 2H), 7.29 – 7.22 (m, 1H), 6.80 (ddd,  $J = 16.0, 4.7, 1.2$  Hz, 1H), 6.29 (ddd,  $J = 16.0, 6.7, 5.0$  Hz, 1H), 6.23 (s, 2H), 5.71 (t,  $J = 6.6$  Hz, 1H), 4.80 (dt,  $J = 24.8, 6.9$  Hz, 1H), 4.18 – 4.07 (m, 4H), 3.73 (s, 6H), 3.56 (s, 3H), 1.25 (td,  $J = 7.1, 3.0$  Hz, 6H).  $^{13}\text{C}$  NMR (101 MHz,  $\text{DMSO-}d_6$ )  $\delta$  153.75, 144.39(d,  $J = 11.1$  Hz), 136.73(d,  $J = 3.0$  Hz), 132.25(d,  $J = 12.1$  Hz), 129.72, 129.19, 128.15, 126.64, 125.18(d,  $J = 3.0$  Hz), 91.83, 62.89(d,  $J = 7.0$  Hz), 62.59(d,  $J = 7.0$  Hz), 60.55, 56.04, 52.57(d,  $J = 154.5$  Hz), 16.80(d,  $J = 5.0$  Hz), 16.76(d,  $J = 4.0$  Hz).  $^{31}\text{P}$  NMR (162 MHz,  $\text{DMSO-}d_6$ )  $\delta$  22.89 ppm.

**(E)-diethyl (3-(4-methoxyphenyl)-1-(o-tolylamino)allyl)phosphonate (1t):**

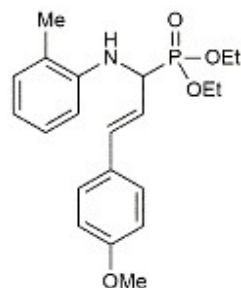

White waxy solid (95%, 369mg).  $^1\text{H}$  NMR (400 MHz,  $\text{DMSO-}d_6$ )  $\delta$  7.37 (d,  $J$  = 8.5 Hz, 2H), 7.04 (t,  $J$  = 8.1 Hz, 2H), 6.96 – 6.87 (m, 2H), 6.77 (d,  $J$  = 8.0 Hz, 1H), 6.70 (dd,  $J$  = 15.8, 4.9 Hz, 1H), 6.62 (td,  $J$  = 7.4, 1.1 Hz, 1H), 6.20 (ddd,  $J$  = 16.0, 6.9, 4.9 Hz, 1H), 4.81 – 4.66 (m, 1H), 4.51 (dd,  $J$  = 9.3, 6.0 Hz, 1H), 4.18 – 4.03 (m, 4H), 3.75 (s, 3H), 2.22 (s, 3H), 1.22 (q,  $J$  = 6.9 Hz, 6H).  $^{13}\text{C}$   $\{^1\text{H}\}$  NMR (101 MHz,  $\text{DMSO-}d_6$ )  $\delta$  159.4, 145.0 (d,  $J$  = 11.1 Hz), 131.8 (d,  $J$  = 13.1 Hz), 130.4, 129.3 (d,  $J$  = 3.0 Hz), 128.0, 127.1, 123.1, 122.2 (d,  $J$  = 3.0 Hz), 117.8, 114.5, 111.7, 62.9 (d,  $J$  = 7.0 Hz), 62.7 (d,  $J$  = 7.0 Hz), 55.5, 52.6 (d,  $J$  = 15.5 Hz), 17.8, 16.7 (d,  $J$  = 5.05 Hz).  $^{31}\text{P}$   $\{^1\text{H}\}$  NMR (162 MHz,  $\text{DMSO-}d_6$ )  $\delta$  23.02.

**(E)-diisopropyl (3-(4-methoxyphenyl)-1-(o-tolylamino)allyl)phosphonate (1u):**

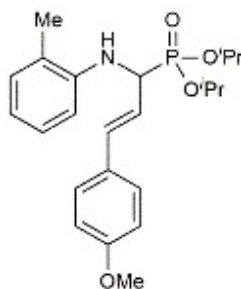

Yellow waxy solid (84%, 350mg).  $^1\text{H}$  NMR (400 MHz,  $\text{DMSO-}d_6$ )  $\delta$  7.37 (d,  $J$  = 8.5 Hz, 2H), 7.04 (t,  $J$  = 8.1 Hz, 2H), 6.95 – 6.87 (m, 2H), 6.80 – 6.66 (m, 2H), 6.66 – 6.58 (m, 1H), 6.21 (ddd,  $J$  = 16.0, 6.8, 4.8 Hz, 1H), 4.78 – 4.56 (m, 3H), 4.46 (dd,  $J$  = 9.1, 6.7 Hz, 1H), 3.75 (s, 3H), 2.23 (s, 3H), 1.29 (dd,  $J$  = 6.2, 4.4 Hz, 6H), 1.21 (dd,  $J$  = 9.3, 6.2 Hz, 6H).  $^{13}\text{C}$   $\{^1\text{H}\}$  NMR (101 MHz,  $\text{DMSO-}d_6$ )  $\delta$  159.4, 145.1 (d,  $J$  = 12.1 Hz), 131.7 (d,  $J$  = 13.1 Hz), 130.4, 129.3 (d,  $J$  = 3.0 Hz), 127.9, 127.2, 122.8, 122.4 (d,  $J$  = 4.0 Hz), 117.7, 114.5, 111.6, 71.4 (d,  $J$  = 7.0 Hz), 71.1 (d,  $J$  = 8.0 Hz), 55.4, 53.0 (d,  $J$  = 15.5 Hz), 24.3 (d,  $J$  = 4.0 Hz), 24.3 (d,  $J$  = 4.0 Hz), 23.9 (d,  $J$  = 5.0 Hz), 23.9 (d,  $J$  = 4.0 Hz), 17.7.  $^{31}\text{P}$   $\{^1\text{H}\}$  NMR (162 MHz,  $\text{DMSO-}d_6$ )  $\delta$  21.26.

**(E)-diethyl (2-((4-methoxyphenyl)amino)-4-phenylbut-3-en-2-yl)phosphonate (1v):**

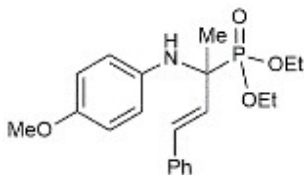

Red viscous oil (87%, 338mg).  $^1\text{H}$  NMR (400 MHz,  $\text{DMSO-}d_6$ )  $\delta$  7.46 (d,  $J = 7.2$  Hz, 2H), 7.35 (t,  $J = 7.6$  Hz, 2H), 7.26 (t,  $J = 7.2$  Hz, 1H), 6.97 – 6.90 (m, 2H), 6.75 – 6.62 (m, 3H), 6.51 (dd,  $J = 16.3, 6.6$  Hz, 1H), 4.85 (d,  $J = 7.7$  Hz, 1H), 4.17 – 4.07 (m, 4H), 1.62 (d,  $J = 15.8$  Hz, 3H), 1.26 (q,  $J = 7.0$  Hz, 6H).  $^{13}\text{C}$   $\{^1\text{H}\}$  NMR (101 MHz,  $\text{DMSO-}d_6$ )  $\delta$  153.2, 139.2 (d,  $J = 13.1$  Hz), 136.9 (d,  $J = 4.0$  Hz), 131.2 (d,  $J = 10.1$  Hz), 130.8 (d,  $J = 6.0$  Hz), 129.1, 128.1, 126.7, 120.4, 114.2, 63.1 (d,  $J = 9.0$  Hz), 63.0 (d,  $J = 8.0$  Hz), 58.2 (d,  $J = 153.5$  Hz), 55.5, 20.9, 16.8 (d,  $J = 5.0$  Hz).  $^{31}\text{P}$   $\{^1\text{H}\}$  NMR (162 MHz,  $\text{DMSO-}d_6$ )  $\delta$  25.39. HRMS (ESI): Calcd for  $\text{C}_{21}\text{H}_{28}\text{NO}_4\text{NaP}$   $[\text{M} + \text{Na}]^+$  : 412.1654, Found: 412.1652.

**(E)-diethyl (1-((4-methoxyphenyl)amino)-2-methyl-3-phenylallyl)phosphonate (1w):**

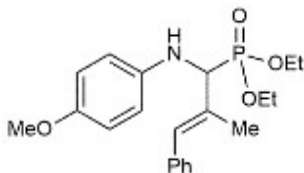

Orange viscous oil (93%, 361mg).  $^1\text{H}$  NMR (400 MHz,  $\text{DMSO-}d_6$ )  $\delta$  7.35 (t,  $J = 7.6$  Hz, 2H), 7.27 – 7.19 (m, 3H), 6.86 – 6.79 (m, 2H), 6.76 – 6.70 (m, 3H), 5.67 (dd,  $J = 10.0, 7.3$  Hz, 1H), 4.47 (dd,  $J = 25.4, 9.9$  Hz, 1H), 4.19 – 4.02 (m, 4H), 3.64 (s, 3H), 1.94 (dd,  $J = 3.3, 1.3$  Hz, 3H), 1.24 (dt,  $J = 9.4, 7.1$  Hz, 6H).  $^{13}\text{C}$   $\{^1\text{H}\}$  NMR (101 MHz,  $\text{DMSO-}d_6$ )  $\delta$  151.8, 141.6 (d,  $J = 16.1$  Hz), 137.5 (d,  $J = 2.0$  Hz), 134.0 (d,  $J = 3.0$  Hz), 129.2 (d,  $J = 12.1$  Hz), 129.0 (d,  $J = 2.0$  Hz), 128.7, 127.0, 115.1, 114.7, 62.8 (d,  $J = 6.0$  Hz), 62.6 (d,  $J = 7.0$  Hz), 58.3 (d,  $J = 151.5$  Hz), 55.6, 16.8 (d,  $J = 6.0$  Hz), 16.7 (d,  $J = 6.0$  Hz), 16.0.  $^{31}\text{P}$   $\{^1\text{H}\}$  NMR (162 MHz,  $\text{DMSO-}d_6$ )  $\delta$  23.20. HRMS (ESI): Calcd for  $\text{C}_{21}\text{H}_{28}\text{NO}_4\text{NaP}$   $[\text{M} + \text{Na}]^+$  : 412.1654, Found: 412.1650.

**(E)-diethyl (1-(methyl(phenyl)amino)-3-phenylallyl)phosphonate (1y):**

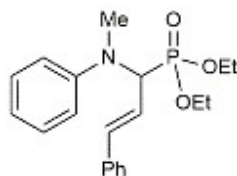

White waxy solid (94%, 337mg).  $^1\text{H}$  NMR (400 MHz,  $\text{DMSO-}d_6$ )  $\delta$  7.51 – 7.45 (m, 2H), 7.38 – 7.20 (m, 5H), 6.97 – 6.90 (m, 2H), 6.82 – 6.68 (m, 2H), 6.46 (dt,  $J = 15.9, 7.2$  Hz, 1H), 5.04 (ddd,  $J = 25.3, 7.0, 1.4$  Hz, 1H), 4.14 – 3.99 (m, 4H), 3.06 (d,  $J = 0.9$  Hz, 3H), 1.18 (dt,  $J = 21.9, 7.0$  Hz, 6H).  $^{13}\text{C}$   $\{^1\text{H}\}$  NMR (101 MHz,  $\text{DMSO-}d_6$ )  $\delta$  149.85 (d,  $J = 7.07$  Hz), 136.5, 134.0 (d,  $J = 13.1$  Hz), 129.4, 129.1, 128.4, 126.9, 121.8, 117.6, 113.7, 62.5 (d,  $J = 7.0$  Hz), 62.3 (d,  $J = 7.0$  Hz), 58.4 (d,  $J = 154.5$  Hz), 34.8, 16.7 (d,  $J = 5.0$  Hz).  $^{31}\text{P}$   $\{^1\text{H}\}$  NMR (162 MHz,  $\text{DMSO-}d_6$ )  $\delta$  22.22. HRMS (ESI): Calcd for  $\text{C}_{20}\text{H}_{26}\text{NO}_3\text{NaP}$   $[\text{M} + \text{Na}]^+$  : 382.1548, Found: 382.1547 .

**(E)-diethyl (3-phenyl-1-(pyridin-4-ylamino)allyl)phosphonate (1z):**

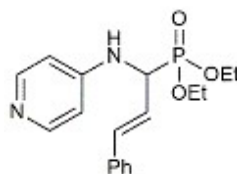

$^1\text{H}$  NMR (400 MHz,  $\text{DMSO-}d_6$ )  $\delta$  7.45 (dd,  $J = 8.0, 1.4$  Hz, 2H), 7.36 (dd,  $J = 8.4, 6.8$  Hz, 2H), 7.34 – 7.21 (m, 1H), 6.74 (ddd,  $J = 15.9, 5.0, 1.7$  Hz, 1H), 6.35 (ddd,  $J = 15.9, 6.0, 4.8$  Hz, 1H), 6.03 (dd,  $J = 12.5, 5.9$  Hz, 1H), 4.63 (dtd,  $J = 15.5, 6.0, 1.7$  Hz, 1H), 4.17 – 3.98 (m, 4H), 1.25 (t,  $J = 7.0$  Hz, 6H).  $^{13}\text{C}$  NMR (101 MHz,  $\text{DMSO-}d_6$ )  $\delta$  136.7 (d,  $J = 3.0$  Hz), 131.0 (d,  $J = 13.1$  Hz), 129.1, 128.1, 126.7 (d,  $J = 2.0$  Hz), 126.4 (d,  $J = 3.0$  Hz), 67.8 (d,  $J = 163.6$  Hz), 62.6 (d,  $J = 7.0$  Hz), 62.3 (d,  $J = 6.0$  Hz), 16.8 (d,  $J = 6.0$  Hz), 16.8 (d,  $J = 5.0$  Hz).  $^{31}\text{P}$  NMR (162 MHz,  $\text{DMSO-}d_6$ )  $\delta$  21.8 ppm. HRMS (ESI): Calcd for  $\text{C}_{18}\text{H}_{23}\text{N}_2\text{O}_3\text{NaP}$   $[\text{M} + \text{Na}]^+$  : 369.1344.

**(E)-diethyl (1-((4-methoxyphenyl)amino)-3,7-dimethylocta-2,6-dien-1-yl)phosphonate (1aa):**

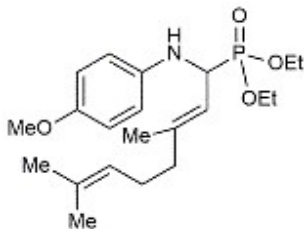

Orange viscous oil (92%, 364 mg) (mixture of two geometric isomers);  $^1\text{H}$  NMR (400 MHz,  $\text{DMSO-}d_6$ )  $\delta$  6.76 – 6.62 (m, 5H), 6.60 – 6.53 (m, 1H), 5.22 (ddd,  $J = 9.0, 7.0, 4.3$  Hz, 1H), 5.17 – 5.01 (m, 2H), 4.46 – 4.31 (m, 1H), 4.13 – 3.96 (m, 4H), 3.64 (d,  $J = 3.8$  Hz, 4H), 2.22 – 1.97 (m, 4H), 1.77 – 1.69 (m, 3H), 1.65 – 1.54 (m, 6H), 1.26 – 1.16 (m, 6H).  $^{13}\text{C}$   $\{^1\text{H}\}$  NMR (101 MHz,  $\text{DMSO-}d_6$ )  $\delta$  151.81, 151.15, 142.76, 142.12, 142.01, 139.92, 139.79, 139.66, 131.54, 131.30, 124.40, 124.08, 121.22, 121.13, 121.10, 115.43, 114.93, 114.84, 114.67, 62.65, 62.58, 62.52, 62.27, 62.24, 62.20, 62.17, 55.63, 55.60, 51.81, 51.72, 50.21, 50.15, 39.61, 32.62, 26.35, 26.23, 26.20, 25.82, 23.47, 17.91, 17.86, 17.07, 16.82, 16.77.  $^{31}\text{P}$   $\{^1\text{H}\}$  NMR (162 MHz,  $\text{DMSO-}d_6$ )  $\delta$  24.33, 24.25. HRMS (ESI): Calcd for  $\text{C}_{21}\text{H}_{34}\text{NO}_4\text{NaP}$   $[\text{M} + \text{Na}]^+$  : 418.2123, Found: 418.2123 .

**(E)-diethyl (1-((4-nitrophenyl)amino)-3-phenylallyl)phosphonate (1bb):**

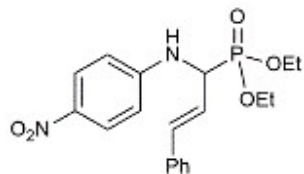

Red viscous liquid (78%, 304 mg) (the compound quickly converted to other product during NMR analysis)  $^1\text{H}$  NMR of the mixture (400 MHz,  $\text{DMSO-}d_6$ )  $\delta$  8.18 – 8.01 (m, 2H), 7.69 (dd,  $J = 9.5, 3.8$  Hz, 1H), 7.42 (d,  $J = 7.0$  Hz, 1H), 7.40 – 7.16 (m, 4H), 7.00 (d,  $J = 9.0$  Hz, 1H), 6.87 – 6.65 (m, 2H), 5.12 – 4.97 (m, 1H), 4.20 – 3.95 (m, 4H), 3.37 (dd,  $J = 7.3, 2.8$  Hz, 1H), 1.22 (dt,  $J = 19.2, 7.0$  Hz, 6H).  $^{13}\text{C}$   $\{^1\text{H}\}$  NMR (101 MHz,  $\text{DMSO-}d_6$ )  $\delta$  154.07, 153.99, 152.81, 144.14, 143.87, 138.42, 137.94, 137.18, 136.37, 132.75, 132.63, 129.25, 129.16, 129.12, 128.92, 128.44, 127.11, 126.97, 126.76, 126.38, 126.30, 123.32, 113.13, 63.11 (d,  $J = 7.0$  Hz), 62.94 (d,  $J = 6.0$  Hz), 62.49 (d,  $J = 5.0$  Hz), 51.76 (d,  $J = 154.5$  Hz), 34.08 (d,  $J = 14.1$  Hz), 16.78 (d,  $J = 7.0$  Hz), 16.61 (d,  $J = 6.0$  Hz).  $^{31}\text{P}$   $\{^1\text{H}\}$  NMR (162 MHz,  $\text{DMSO-}d_6$ )  $\delta$  21.33, 13.01 ppm; HRMS (ESI): Calcd for  $\text{C}_{19}\text{H}_{23}\text{N}_2\text{O}_5\text{NaP}$   $[\text{M} + \text{Na}]^+$  : 413.1242, Found: 413.1242 .

**(E)-diethyl (1-((3-nitrophenyl)amino)-3-phenylallyl)phosphonate (1cc):**



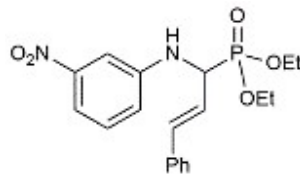

Red viscous oil (84%, 327mg).  $^1\text{H}$  NMR (400 MHz,  $\text{DMSO-}d_6$ )  $\delta$  7.73 (t,  $J = 2.3$  Hz, 1H), 7.45 – 7.23 (m, 8H), 6.88 (dd,  $J = 9.4, 4.5$  Hz, 1H), 6.77 (ddd,  $J = 16.0, 4.9, 1.4$  Hz, 1H), 6.30 (ddd,  $J = 16.0, 6.3, 4.9$  Hz, 1H), 4.95 (dddd,  $J = 24.0, 9.4, 6.3, 1.5$  Hz, 1H), 4.20 – 4.00 (m, 4H), 1.22 (dt,  $J = 16.1, 7.1$  Hz, 6H).  $^{13}\text{C}$   $\{^1\text{H}\}$  NMR (101 MHz,  $\text{DMSO-}d_6$ )  $\delta$  149.1, 149.0 (d,  $J = 10.1$  Hz), 136.4 (d,  $J = 3.0$  Hz), 132.2 (d,  $J = 12.1$  Hz), 130.3, 129.2, 128.3, 126.7, 123.9 (d,  $J = 3.0$  Hz), 119.6, 111.3, 107.5, 62.9 (d,  $J = 7.0$  Hz), 62.7 (d,  $J = 7.0$  Hz), 51.8 (d,  $J = 154.5$  Hz), 16.7 (d,  $J = 5.0$  Hz).  $^{31}\text{P}$   $\{^1\text{H}\}$  NMR (162 MHz,  $\text{DMSO-}d_6$ )  $\delta$  22.00. HRMS (ESI): Calcd for  $\text{C}_{19}\text{H}_{23}\text{N}_2\text{O}_5\text{NaP}$   $[\text{M} + \text{Na}]^+$  : 413.1242, Found: 413.1239.

**(E)-diethyl (1-((4-methoxyphenyl)amino)-3-(2-nitrophenyl)allyl)phosphonate (1dd):**

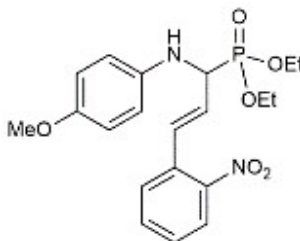

Red viscous liquid (90%, 378mg).  $^1\text{H}$  NMR (400 MHz,  $\text{DMSO-}d_6$ )  $\delta$  7.94 – 7.88 (m, 1H), 7.66 (dd,  $J = 6.6, 1.4$  Hz, 2H), 7.48 (ddd,  $J = 8.5, 6.5, 2.3$  Hz, 1H), 7.13 – 7.04 (m, 1H), 6.88 – 6.83 (m, 2H), 6.78 – 6.72 (m, 2H), 6.38 (ddd,  $J = 15.7, 6.5, 4.8$  Hz, 1H), 5.58 (s, 1H), 4.75 (dd,  $J = 25.4, 6.3$  Hz, 1H), 4.13 (dddd,  $J = 13.8, 8.9, 7.0, 4.7$  Hz, 4H), 3.65 (s, 3H), 1.25 (dt,  $J = 10.3, 7.0$  Hz, 6H).  $^{13}\text{C}$   $\{^1\text{H}\}$  NMR (101 MHz,  $\text{DMSO-}d_6$ )  $\delta$  152.0, 148.0, 141.5 (d,  $J = 11.1$  Hz), 133.7, 131.3, 131.3 (d,  $J = 4.0$  Hz), 129.1, 128.5, 126.6 (d,  $J = 13.1$  Hz), 124.6, 115.1, 114.7, 63.0 (d,  $J = 7.0$  Hz), 62.6 (d,  $J = 7.0$  Hz), 55.6, 53.3 (d,  $J = 153.5$  Hz), 16.7 (d,  $J = 5.0$  Hz), 16.6 (d,  $J = 5.0$  Hz).  $^{31}\text{P}$   $\{^1\text{H}\}$  NMR (162 MHz,  $\text{DMSO-}d_6$ )  $\delta$  22.17. HRMS (ESI): Calcd for  $\text{C}_{20}\text{H}_{25}\text{N}_2\text{O}_6\text{NaP}$   $[\text{M} + \text{Na}]^+$  : 443.1348, Found: 443.1348.

Table S1. Aza-Claisen rearrangement of aminophosphonate **1a** in various conditions

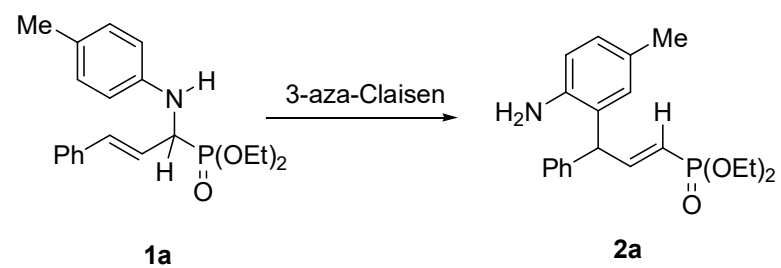

| Entry | Additive                          | Solvent            | $T(^{\circ}\text{C})$ | Time (h) | Yield of <b>2a</b> <sup>a</sup> |
|-------|-----------------------------------|--------------------|-----------------------|----------|---------------------------------|
| 1     | -                                 | H <sub>2</sub> O   | reflux                | 24       | -                               |
| 2     | -                                 | EtOH               | reflux                | 24       | -                               |
| 3     | -                                 | CH <sub>3</sub> CN | reflux                | 24       | -                               |
| 4     | -                                 | 1,4-Dioxane        | 100                   | 24       | -                               |
| 5     | -                                 | DMF                | 100                   | 24       | -                               |
| 6     | -                                 | DMSO               | 100                   | 24       | -                               |
| 7     | -                                 | Toluene            | 100                   | 24       | -                               |
| 8     | BF <sub>3</sub> ·OEt <sub>2</sub> | Toluene            | rt                    | 24       | - <sup>b</sup>                  |
| 9     | ZnCl <sub>2</sub>                 | DMF                | 100                   | 24       | - <sup>b</sup>                  |
| 10    | AcOH (2 mL)                       | -                  | reflux                | 24       | 10                              |
| 11    | HCl (2 mL, 36%)                   | -                  | reflux                | 24       | - <sup>c</sup>                  |
| 12    | HCl (2 mL, 36%)                   | -                  | rt                    | 24       | 45                              |
| 13    | HCl (2 mL, 36%)                   | -                  | rt                    | 12       | 58                              |
| 14    | HCl (2 mL, 36%)                   | -                  | rt                    | 6        | 58                              |

|    |                                                                |                                        |        |    |    |
|----|----------------------------------------------------------------|----------------------------------------|--------|----|----|
| 15 | HCl (1 mL, 36%)                                                | EtOH (1 mL)                            | rt     | 12 | 58 |
| 16 | HCl (2 mL, 36%)                                                | EtOH (1 mL)                            | rt     | 12 | 67 |
| 17 | HCl (2 mL, 36%)                                                | EtOH (1 mL)                            | rt     | 24 | 63 |
| 18 | MeSO <sub>3</sub> H (2 mL, 98%)                                | -                                      | rt     | 24 | 48 |
| 19 | MeSO <sub>3</sub> H (2 mL, 98%)                                | -                                      | reflux | 24 | 36 |
| 20 | MeSO <sub>3</sub> H/P <sub>2</sub> O <sub>5</sub> (1 mL/0.2 g) | -                                      | 70     | 24 | 70 |
| 21 | MeSO <sub>3</sub> H/P <sub>2</sub> O <sub>5</sub> (1 mL/0.2 g) | -                                      | 100    | 24 | 65 |
| 22 | TFA (0.2 mL)                                                   | CH <sub>2</sub> Cl <sub>2</sub> (2 mL) | rt     | 24 | -  |
| 23 | TFA (0.2 mL)                                                   | EtOH (2 mL)                            | rt     | 24 | -  |
| 24 | TFA (1 mL)                                                     | -                                      | rt     | 12 | 58 |
| 25 | TFA (1 mL)                                                     | -                                      | 50     | 12 | 66 |
| 26 | TFA (1 mL)                                                     | -                                      | reflux | 4  | 83 |
| 27 | TFA (1 mL)                                                     | -                                      | reflux | 8  | 83 |

<sup>a</sup>Yields refers to the isolated product **2a** after short column chromatography for the reaction of **1a** (1 mmol). <sup>b</sup> Reactions carried out in the presence 3 equiv of additive. <sup>c</sup>Hydrolyzed product (phosphonate to phosphonic acid) was detected.

**General procedure for the Aza-Claisen rearrangement of 1-aminophosphonate 1 in TFA:** 1-Aminophosphonate **1** (1 mmol) was added to a TFA (1 mL). The reaction mixture was stirred at reflux for 1-4 h without using any inert gas. The completion of the reaction was monitored by TLC. Ethyl acetate (10 mL) was added to the reaction mixture and the solution was washed with NaOH (10 %, 2 x 5 mL) and dried over sodium sulfate. The solvent was evaporated and the crude product was purified by a short column chromatography with *n*-Hexane-EtOAc (5:5 to 1:20) to give the compound **2** as the viscous oil or white solid. All products gave satisfactory spectral data in accord with the assigned structures.

**General procedure for the Aza-Claisen rearrangement of 1-aminophosphonate 1 in HCl:EtOH:** 1-Aminophosphonate **1** (1 mmol) was added to a mixture of HCl (37%) in EtOH (2:1 v:v, 2 mL). The reaction mixture was stirred at rt for 1-4 h without using any inert gas. The completion of the reaction was monitored by TLC. Ethyl acetate (10 mL) was added to the reaction mixture and the solution was washed with NaOH (10 %, 2 x 5 mL) and dried over sodium sulfate. The solvent was evaporated and the crude product was purified by a short column chromatography with *n*-Hexane-EtOAc (5:5 to 1:20) to give the compound **2** as the viscous oil or white solid. All products gave satisfactory spectral data in accord with the assigned structures.

**(E)-diethyl (3-(2-amino-5-methylphenyl)-3-phenylprop-1-en-1-yl)phosphonate (2a):**

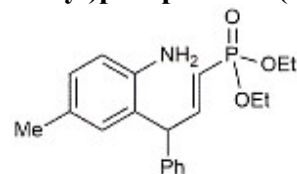

White waxy solid (83%, 298mg).  $^1\text{H}$  NMR (400 MHz, DMSO- $d_6$ )  $\delta$  7.37 (dd,  $J$  = 8.1, 6.8 Hz, 2H), 7.30 – 7.25 (m, 1H), 7.24 – 7.20 (m, 2H), 7.08 – 6.99 (m, 1H), 6.97 (dd,  $J$  = 6.6, 2.1 Hz, 1H), 6.90 (dd,  $J$  = 8.1, 6.1 Hz, 1H), 6.83 (d,  $J$  = 2.0 Hz, 1H), 5.63 (ddt,  $J$  = 20.6, 17.0, 1.9 Hz, 1H), 5.21 (d,  $J$  = 6.9 Hz, 1H), 3.98 (dddd,  $J$  = 8.5, 7.1, 6.3, 3.6 Hz, 4H), 2.22 (d,  $J$  = 19.5 Hz, 3H), 1.23 (td,  $J$  = 7.1, 3.9 Hz, 6H).  $^{13}\text{C}$  { $^1\text{H}$ } NMR (101 MHz, DMSO- $d_6$ )  $\delta$  153.3 (d,  $J$  = 6.0 Hz), 141.0, 129.8, 129.1, 129.1, 129.0, 129.0, 128.8, 128.8, 128.7, 127.3, 118.2 (d,  $J$  = 183.8 Hz), 61.7 (d,  $J$  = 5.0

H<sub>z</sub>), 47.9 (d, *J* = 21.2 Hz), 20.9, 16.6 (d, *J* = 6.0 Hz). <sup>31</sup>P {<sup>1</sup>H} NMR (162 MHz, DMSO-*d*<sub>6</sub>) δ 17.73. HRMS (ESI): Calcd for C<sub>20</sub>H<sub>26</sub>NO<sub>3</sub>NaP [M + Na]<sup>+</sup>: 382.1548, Found: 382.1544.

**(E)-diisopropyl (3-(2-amino-5-methylphenyl)-3-phenylprop-1-en-1-yl)phosphonate (2b):**

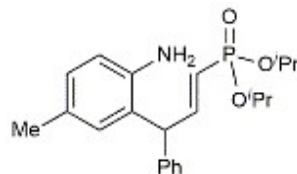

Dark orangewaxy solid (77%, 298mg). <sup>1</sup>H NMR (400 MHz, DMSO-*d*<sub>6</sub>) δ 7.35 (dd, *J* = 8.2, 6.9 Hz, 2H), 7.29 – 7.23 (m, 1H), 7.21 – 7.15 (m, 2H), 7.04 – 6.91 (m, 1H), 6.80 (dd, *J* = 8.1, 2.0 Hz, 1H), 6.66 – 6.56 (m, 2H), 5.60 – 5.46 (m, 1H), 5.05 (d, *J* = 6.7 Hz, 1H), 4.69 (s, 2H, NH<sub>2</sub>), 4.52 (dpd, *J* = 8.1, 6.2, 4.1 Hz, 2H), 2.13 (s, 3H), 1.27 – 1.20 (m, 12H). <sup>13</sup>C {<sup>1</sup>H} NMR (101 MHz, DMSO-*d*<sub>6</sub>) δ 153.0 (d, *J* = 6.0 Hz), 143.8, 141.4, 132.1, 132.0, 129.1, 129.0, 129.0, 128.8, 128.4, 127.1, 125.0, 125.0, 119.1 (d, *J* = 184.8 Hz), 116.0, 70.0 (d, *J* = 6.0 Hz), 48.2 (d, *J* = 22.2 Hz), 24.1 (d, *J* = 4.0 Hz), 24.1 (d, *J* = 4.0 Hz), 20.7. <sup>31</sup>P {<sup>1</sup>H} NMR (162 MHz, DMSO-*d*<sub>6</sub>) δ 16.00. HRMS (ESI): Calcd for C<sub>22</sub>H<sub>30</sub>NO<sub>3</sub>NaP [M + Na]<sup>+</sup>: 410.1861, Found: 410.1858.

**(E)-diethyl (3-(2-aminophenyl)-3-phenylprop-1-en-1-yl)phosphonate(2c):**

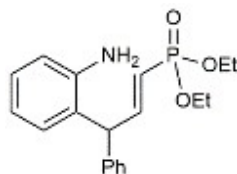

Whitewaxy solid (91%, 314mg). <sup>1</sup>H NMR (400 MHz, DMSO-*d*<sub>6</sub>) δ 7.40 – 7.35 (m, 2H), 7.33 – 7.24 (m, 2H), 7.24 – 7.20 (m, 2H), 7.16 – 7.10 (m, 1H), 7.04 – 6.93 (m, 2H), 6.85 (t, *J* = 7.5 Hz, 1H), 5.66 – 5.54 (m, 1H), 5.21 (d, *J* = 6.8 Hz, 1H), 3.98 (dq, *J* = 8.4, 7.1, 2.9 Hz, 4H), 1.22 (td, *J* = 7.1, 2.9 Hz, 6H). <sup>13</sup>C {<sup>1</sup>H} NMR (101 MHz, Chloroform-*d*) δ 152.9 (d, *J* = 6.0 Hz), 139.1, 129.5, 129.0, 128.9, 128.8, 128.8, 128.8, 128.7, 128.3, 127.4, 118.5 (d, *J* = 187.8 Hz), 62.0 (d, *J* = 5.0 Hz), 49.4 (d, *J* = 22.2 Hz), 16.3 (d, *J* = 6.0 Hz). <sup>31</sup>P {<sup>1</sup>H} NMR (162 MHz, DMSO-*d*<sub>6</sub>) δ 17.73. HRMS(ESI): Calcd for C<sub>19</sub>H<sub>24</sub>NO<sub>3</sub>NaP [M + Na]<sup>+</sup>: 368.1391, Found: 368.1388.

**(E)-diethyl (3-(2-amino-5-bromophenyl)-3-phenylprop-1-en-1-yl)phosphonate (2d):**

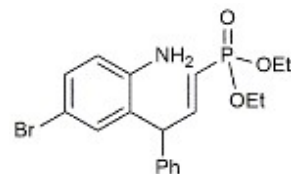

Whitewaxy solid (91%, 385mg).  $^1\text{H}$  NMR (400 MHz, DMSO- $d_6$ )  $\delta$  7.43 – 7.34 (m, 2H), 7.33 – 7.25 (m, 1H), 7.24 – 7.16 (m, 2H), 7.16 – 7.09 (m, 1H), 7.07 – 6.90 (m, 1H), 6.89 – 6.82 (m, 1H), 6.70 – 6.60 (m, 1H), 5.67 – 5.51 (m, 1H), 5.20 (s, 2H, NH<sub>2</sub>), 5.09 (dt,  $J$  = 6.8, 1.8 Hz, 1H), 4.05 – 3.93 (m, 4H), 1.23 (td,  $J$  = 7.0, 2.1 Hz, 6H).  $^{13}\text{C}$  { $^1\text{H}$ } NMR (101 MHz, DMSO- $d_6$ )  $\delta$  152.7 (d,  $J$  = 6.0 Hz), 145.8, 140.6, 130.9, 130.5, 129.2, 128.8, 127.4, 127.1, 118.2 (d,  $J$  = 183.8 Hz), 117.6, 107.1, 61.7 (d,  $J$  = 6.0 Hz), 48.1 (d,  $J$  = 21.2 Hz), 16.6 (d,  $J$  = 6.0 Hz).  $^{31}\text{P}$  { $^1\text{H}$ } NMR (162 MHz, DMSO- $d_6$ )  $\delta$  17.60. HRMS(ESI): Calcd for C<sub>19</sub>H<sub>23</sub>BrNO<sub>3</sub>NaP [M + Na]<sup>+</sup>: 446.0497, Found: 446.0494.

**(E)-diethyl (3-(2-amino-5-chlorophenyl)-3-phenylprop-1-en-1-yl)phosphonate(2e):**

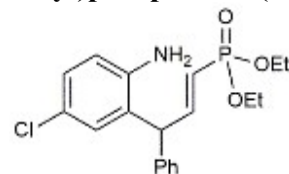

Dark orangewaxy solid (94%, 356mg).  $^1\text{H}$  NMR (400 MHz, Chloroform- $d$ )  $\delta$  7.38 – 7.28 (m, 3H), 7.23 – 7.12 (m, 3H), 7.10 (dd,  $J$  = 8.4, 2.5 Hz, 1H), 6.98 (d,  $J$  = 2.4 Hz, 1H), 6.78 (d,  $J$  = 8.4 Hz, 1H), 5.60 – 5.47 (m, 1H), 5.20 – 4.45 (m, 3H, NH<sub>2</sub> + CH), 4.17 – 4.06 (m, 5H), 1.33 (td,  $J$  = 7.1, 2.0 Hz, 6H).  $^{13}\text{C}$  { $^1\text{H}$ } NMR (101 MHz, Chloroform- $d$ )  $\delta$  152.1 (d,  $J$  = 6.0 Hz), 140.7, 138.5, 129.1, 128.9, 128.9, 128.8, 128.0, 127.6, 125.2, 119.0, 118.9 (d,  $J$  = 186.8 Hz), 62.0 (d,  $J$  = 6.0 Hz), 49.7 (d,  $J$  = 22.2 Hz), 16.3 (d,  $J$  = 6.0 Hz).  $^{31}\text{P}$  { $^1\text{H}$ } NMR (162 MHz, Chloroform- $d$ )  $\delta$  17.98. HRMS(ESI): Calcd for C<sub>19</sub>H<sub>23</sub>ClNO<sub>3</sub>NaP [M + Na]<sup>+</sup>: 402.1001, Found: 402.0996.

**(E)-diisopropyl (3-(2-amino-5-chlorophenyl)-3-phenylprop-1-en-1-yl)phosphonate (2f):**

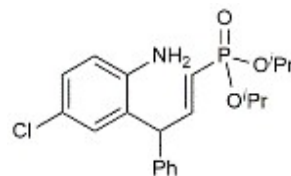

White solid (82%, 333mg, M.P. 91-94 °C).  $^1\text{H}$  NMR (400 MHz, DMSO- $d_6$ )  $\delta$  7.42 – 7.34 (m, 2H), 7.32 – 7.26 (m, 1H), 7.22 – 7.15 (m, 2H), 7.04 – 6.87 (m, 2H), 6.75 – 6.65 (m, 2H), 5.54 (ddd,  $J$  = 20.2, 16.9, 1.4 Hz, 1H), 5.18 (s, 2H, NH<sub>2</sub>), 5.09 (dt,  $J$  = 6.8, 1.9 Hz, 1H), 4.52 (dpd,  $J$  = 8.2, 6.2, 3.9 Hz, 2H), 1.23 (ddd,  $J$  = 11.3, 6.1, 3.0 Hz, 12H).  $^{13}\text{C}$  { $^1\text{H}$ } NMR (101 MHz, DMSO- $d_6$ )  $\delta$  152.0 (d,  $J$  = 6.0 Hz), 145.4, 140.6, 129.1, 128.8,

128.1, 127.6, 127.4, 126.6, 119.7 (d,  $J = 184.8$  Hz), 119.6, 117.0, 70.1 (d,  $J = 5.0$  Hz), 47.9 (d,  $J = 22.2$  Hz), 24.1 (d,  $J = 4.0$  Hz), 24.1 (d,  $J = 4.0$  Hz).  $^{31}\text{P}$  { $^1\text{H}$ } NMR (162 MHz, DMSO- $d_6$ )  $\delta$  15.63. HRMS(ESI): Calcd for  $\text{C}_{21}\text{H}_{27}\text{ClNO}_3\text{NaP}$  [ $\text{M} + \text{Na}$ ] $^+$ : 430.1315, Found: 430.1312.

**(E)-diethyl (3-(2-amino-5-methoxyphenyl)-3-phenylprop-1-en-1-yl)phosphonate (2g):**

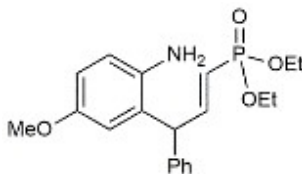

White waxy solid (95%, 356mg),  $^1\text{H}$  NMR (400 MHz, Chloroform- $d$ )  $\delta$  7.38 – 7.32 (m, 2H), 7.31 – 7.26 (m, 1H), 7.24 – 7.14 (m, 3H), 6.72 (dd,  $J = 8.6, 2.8$  Hz, 1H), 6.67 (d,  $J = 8.5$  Hz, 1H), 6.64 (d,  $J = 2.7$  Hz, 1H), 5.52 (ddd,  $J = 20.3, 17.2, 1.8$  Hz, 1H), 4.90 (dt,  $J = 5.4, 2.2$  Hz, 1H), 4.18 – 4.05 (m, 4H), 3.75 (s, 3H), 3.28 (s, 2H,  $\text{NH}_2$ ), 1.33 (td,  $J = 7.1, 2.7$  Hz, 6H).  $^{13}\text{C}$  { $^1\text{H}$ } NMR (101 MHz, Chloroform- $d$ )  $\delta$  153.0, 152.8 (d,  $J = 6.0$  Hz), 139.2, 137.7, 128.9, 128.8, 127.8, 127.3, 118.4 (d,  $J = 186.8$  Hz), 117.8, 115.4, 112.8, 61.7 (d,  $J = 6.0$  Hz), 55.6, 50.2 (d,  $J = 21.2$  Hz), 16.3 (d,  $J = 6.0$  Hz).  $^{31}\text{P}$  { $^1\text{H}$ } NMR (162 MHz, Chloroform- $d$ )  $\delta$  18.24. HRMS(ESI): Calcd for  $\text{C}_{20}\text{H}_{26}\text{NO}_4\text{NaP}$  [ $\text{M} + \text{Na}$ ] $^+$ : 398.1497, Found: 398.1494.

**(E)-diisopropyl (3-(2-amino-5-methoxyphenyl)-3-phenylprop-1-en-1-yl)phosphonate (2h):**

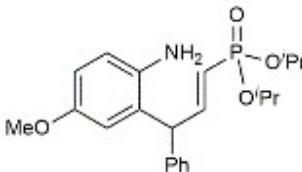

Dark orangewaxy solid (96%, 386mg),  $^1\text{H}$  NMR (400 MHz, DMSO- $d_6$ )  $\delta$  7.36 (t,  $J = 7.5$  Hz, 2H), 7.30 – 7.24 (m, 1H), 7.22 – 7.17 (m, 2H), 6.99 (ddd,  $J = 21.2, 16.9, 6.7$  Hz, 1H), 6.70 – 6.63 (m, 2H), 6.45 – 6.40 (m, 1H), 5.55 (ddd,  $J = 20.4, 17.0, 1.5$  Hz, 1H), 5.08 (dt,  $J = 6.7, 2.0$  Hz, 1H), 4.52 (dpd,  $J = 8.1, 6.2, 3.6$  Hz, 4H,  $\text{NH}_2 + \text{OCH}$ ), 3.61 (s, 3H), 1.23 (ddd,  $J = 11.5, 6.2, 3.7$  Hz, 12H).  $^{13}\text{C}$  { $^1\text{H}$ } NMR (101 MHz, Chloroform- $d$ )  $\delta$  157.4 (d,  $J = 5.0$  Hz), 156.1, 145.9, 144.8, 133.8, 133.6, 131.9, 131.2, 124.1 (d,  $J = 184.8$  Hz), 121.6, 119.6, 117.8, 74.8 (d,  $J = 6.0$  Hz), 60.3, 53.3 (d,  $J = 21.2$  Hz), 28.9 (d,  $J = 3.0$  Hz), 28.8 (d,  $J = 4.0$  Hz).  $^{31}\text{P}$  { $^1\text{H}$ } NMR (162 MHz, DMSO- $d_6$ )  $\delta$  15.90. HRMS(ESI): Calcd for  $\text{C}_{20}\text{H}_{30}\text{NO}_4\text{NaP}$  [ $\text{M} + \text{Na}$ ] $^+$ : 426.1810, Found: 426.1808.



**(E)-diethyl (3-(2-amino-3-methylphenyl)-3-phenylprop-1-en-1-yl)phosphonate (2i):**

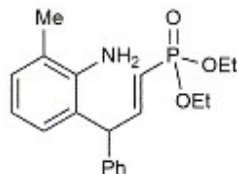

Whitewaxy solid (92%, 330mg).  $^1\text{H}$  NMR (400 MHz,  $\text{DMSO-}d_6$ )  $\delta$  7.39 – 7.34 (m, 2H), 7.30 – 7.25 (m, 1H), 7.22 – 7.19 (m, 2H), 7.09 – 6.96 (m, 2H), 6.80 (dd,  $J = 7.7, 1.6$  Hz, 1H), 6.73 (t,  $J = 7.5$  Hz, 1H), 5.64 – 5.51 (m, 1H), 5.45 – 5.18 (m, 1H), 3.98 (dddd,  $J = 10.6, 7.1, 4.9, 3.5$  Hz, 4H), 2.18 (s, 3H), 1.23 (td,  $J = 7.0, 3.3$  Hz, 6H).  $^{13}\text{C}$   $\{^1\text{H}\}$  NMR (101 MHz,  $\text{DMSO-}d_6$ )  $\delta$  153.6 (d,  $J = 6.0$  Hz), 141.2, 129.5, 129.2, 129.0, 128.9, 128.6, 128.5, 127.2, 127.0, 126.9, 117.9 (d,  $J = 184.8$  Hz), 61.6 (d,  $J = 6.0$  Hz), 48.2 (d,  $J = 21.2$  Hz), 18.6, 16.6 (d,  $J = 5.0$  Hz).  $^{31}\text{P}$   $\{^1\text{H}\}$  NMR (162 MHz,  $\text{DMSO-}d_6$ )  $\delta$  17.79. HRMS(ESI): Calcd for  $\text{C}_{20}\text{H}_{26}\text{NO}_3\text{NaP}$   $[\text{M} + \text{Na}]^+$ : 382.1548, Found: 382.1545.

**(E)-diisopropyl (3-(2-amino-3-methylphenyl)-3-phenylprop-1-en-1-yl)phosphonate (2j):**

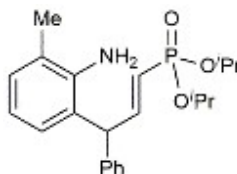

Dark orangewaxy solid (85%, 329mg).  $^1\text{H}$  NMR (400 MHz,  $\text{DMSO-}d_6$ )  $\delta$  7.35 (dd,  $J = 8.1, 6.8$  Hz, 2H), 7.29 – 7.23 (m, 1H), 7.23 – 7.18 (m, 2H), 7.02 (ddd,  $J = 21.2, 16.9, 6.5$  Hz, 1H), 6.95 – 6.90 (m, 1H), 6.73 (dd,  $J = 7.7, 1.5$  Hz, 1H), 6.54 (t,  $J = 7.5$  Hz, 1H), 5.54 (ddd,  $J = 20.5, 17.0, 1.5$  Hz, 1H), 5.18 (dt,  $J = 6.6, 1.9$  Hz, 1H), 4.78 – 4.48 (m, 4H,  $\text{NH}_2 + 2\text{OCH}$ ), 2.11 (s, 3H), 1.23 (ddd,  $J = 12.1, 6.2, 3.9$  Hz, 12H).  $^{13}\text{C}$   $\{^1\text{H}\}$  NMR (101 MHz,  $\text{DMSO-}d_6$ )  $\delta$  153.1 (d,  $J = 6.0$  Hz), 143.9, 141.5, 129.1, 128.9, 128.9, 127.1, 126.5, 124.6, 122.4, 119.1 (d,  $J = 184.8$  Hz), 116.4, 70.0 (d,  $J = 6.0$  Hz), 48.5 (d,  $J = 21.2$  Hz), 24.1 (d,  $J = 4.0$  Hz), 24.0 (d,  $J = 4.0$  Hz), 18.6.  $^{31}\text{P}$   $\{^1\text{H}\}$  NMR (162 MHz,  $\text{DMSO-}d_6$ )  $\delta$  16.03. HRMS(ESI): Calcd for  $\text{C}_{22}\text{H}_{30}\text{NO}_3\text{NaP}$   $[\text{M} + \text{Na}]^+$ : 410.1816, Found: 410.1859.

**(E)-diethyl (3-(2-amino-3-ethylphenyl)-3-phenylprop-1-en-1-yl)phosphonate (2k):**

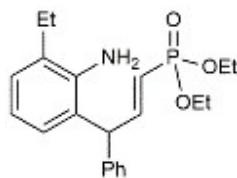

Whitewaxy solid (96%, 358mg).  $^1\text{H}$  NMR (400 MHz,  $\text{DMSO-}d_6$ )  $\delta$  7.36 (t,  $J = 7.5$  Hz, 2H), 7.30 – 7.23 (m, 1H), 7.23 – 7.17 (m, 2H), 7.10 – 6.95 (m, 1H), 6.92 (dd,  $J = 7.5, 1.4$  Hz, 1H), 6.71 (d,  $J = 7.6$  Hz, 1H), 6.58 (t,  $J = 7.5$  Hz, 1H), 5.62 – 5.46 (m, 1H), 5.21 – 5.12 (m, 1H), 4.63 (s, 2H,  $\text{NH}_2$ ), 4.02 – 3.92 (m, 4H), 2.48 (tt,  $J = 7.4, 3.4$  Hz, 2H), 1.22 (td,  $J = 7.0, 3.4$  Hz, 6H), 1.14 (dd,  $J = 8.1, 6.7$  Hz, 3H).  $^{13}\text{C}$   $\{^1\text{H}\}$  NMR (101 MHz,  $\text{DMSO-}d_6$ )  $\delta$  154.0 (d,  $J = 6.0$  Hz), 143.3, 141.4, 129.0, 128.9, 128.0, 127.2, 127.1, 126.5, 124.7, 117.5 (d,  $J = 183.8$  Hz), 116.6, 61.6 (d,  $J = 6.0$  Hz), 48.6 (d,  $J = 22.2$  Hz), 24.3, 16.6 (d,  $J = 6.0$  Hz), 13.6.  $^{31}\text{P}$   $\{^1\text{H}\}$  NMR (162 MHz,  $\text{DMSO-}d_6$ )  $\delta$  17.99. HRMS(ESI): Calcd for  $\text{C}_{21}\text{H}_{28}\text{NO}_3\text{NaP}$   $[\text{M} + \text{Na}]^+$ : 396.1704, Found: 396.1700.

**(E)-diisopropyl (3-(2-amino-3-ethylphenyl)-3-phenylprop-1-en-1-yl)phosphonate (2l):**

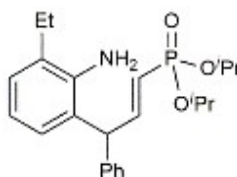

Dark orange waxy solid (89%, 357mg).  $^1\text{H}$  NMR (400 MHz,  $\text{DMSO-}d_6$ )  $\delta$  7.36 (t,  $J = 7.5$  Hz, 2H), 7.26 (t,  $J = 7.4$  Hz, 1H), 7.19 (d,  $J = 7.5$  Hz, 2H), 7.07 – 6.89 (m, 2H), 6.71 (dd,  $J = 7.7, 1.5$  Hz, 1H), 6.58 (t,  $J = 7.5$  Hz, 1H), 5.52 (dd,  $J = 20.5, 16.9$  Hz, 1H), 5.17 (d,  $J = 6.6$  Hz, 1H), 4.95 – 4.45 (m, 4H,  $\text{NH}_2 + 2\text{OCH}$ ), 2.55 – 2.43 (m, 2H), 1.23 (ddd,  $J = 12.3, 6.3, 3.8$  Hz, 12H), 1.15 (t,  $J = 7.4$  Hz, 3H).  $^{13}\text{C}$   $\{^1\text{H}\}$  NMR (101 MHz,  $\text{DMSO-}d_6$ )  $\delta$  153.2 (d,  $J = 6.0$  Hz), 143.3, 141.5, 129.0, 128.9, 128.0, 127.1, 127.0, 126.4, 124.8, 119.0 (d,  $J = 184.3$  Hz), 116.6, 70.0 (d,  $J = 6.0$  Hz), 48.5 (d,  $J = 21.2$  Hz), 24.3, 24.1 (d,  $J = 4.0$  Hz), 24.0 (d,  $J = 4.0$  Hz), 13.6.  $^{31}\text{P}$   $\{^1\text{H}\}$  NMR (162 MHz,  $\text{DMSO-}d_6$ )  $\delta$  16.00. HRMS(ESI): Calcd for  $\text{C}_{23}\text{H}_{32}\text{NO}_3\text{NaP}$   $[\text{M} + \text{Na}]^+$ : 424.2018, Found: 424.2015.

**(E)-diethyl (3-(1-aminonaphthalen-2-yl)-3-phenylprop-1-en-1-yl)phosphonate (2m):**

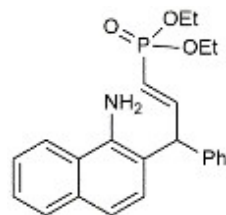

Pale brown viscous oil [method (HCl:EtOH) 85%, 335mg].  $^1\text{H}$  NMR (400 MHz, DMSO- $d_6$ )  $\delta$  8.30 – 8.18 (m, 1H), 7.77 – 7.71 (m, 1H), 7.46 – 7.40 (m, 2H), 7.40 – 7.32 (m, 2H), 7.32 – 7.10 (m, 5H), 7.05 (d,  $J$  = 8.5 Hz, 1H), 6.50 – 4.90 (m, 4H, NH<sub>2</sub>, 2 $\times$ CH), 4.06 – 3.96 (m, 4H), 1.24 (td,  $J$  = 7.0, 6.2 Hz, 6H).  $^{13}\text{C}$  { $^1\text{H}$ } NMR (101 MHz, DMSO- $d_6$ )  $\delta$  153.7 (d,  $J$  = 5.0 Hz), 141.9, 141.4, 133.5, 129.0, 128.9, 128.2, 127.3, 127.1, 125.9, 124.6, 123.6, 122.9, 118.0, 117.7 (d,  $J$  = 183.8 Hz), 116.3, 61.6 (d,  $J$  = 6.0 Hz), 48.3 (d,  $J$  = 21.2 Hz), 16.6 (d,  $J$  = 6.0 Hz).  $^{31}\text{P}$  { $^1\text{H}$ } NMR (162 MHz, DMSO- $d_6$ )  $\delta$  18.06.

**(E)-diethyl (3-(2-amino-4-chloro-3-methylphenyl)-3-phenylprop-1-en-1-yl)phosphonate (2n):**

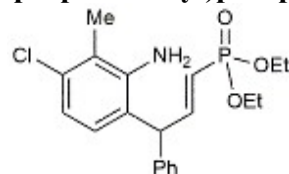

White solid (95%, 373mg); M.P. 88-91 °C;  $^1\text{H}$  NMR (400 MHz, Chloroform- $d$ )  $\delta$  7.38 – 7.32 (m, 2H), 7.32 – 7.27 (m, 1H), 7.27 – 7.14 (m, 3H), 6.91 – 6.79 (m, 2H), 5.50 (ddd,  $J$  = 20.1, 17.2, 1.7 Hz, 1H), 4.81 (dt,  $J$  = 5.2, 2.3 Hz, 1H), 4.18 – 4.05 (m, 4H), 3.63 (s, 2H, NH<sub>2</sub>), 2.23 (s, 3H), 1.33 (td,  $J$  = 7.1, 2.5 Hz, 6H).  $^{13}\text{C}$  { $^1\text{H}$ } NMR (101 MHz, Chloroform- $d$ )  $\delta$  152.6 (d,  $J$  = 7.0 Hz), 143.6, 139.0, 133.7, 129.0, 128.7, 127.5, 127.1, 123.6, 120.5, 118.9, 118.6 (d,  $J$  = 187.8 Hz), 61.8 (d,  $J$  = 6.0 Hz), 50.2 (d,  $J$  = 22.2 Hz), 16.3 (d,  $J$  = 6.0 Hz), 14.0.  $^{31}\text{P}$  { $^1\text{H}$ } NMR (162 MHz, CDCl<sub>3</sub>)  $\delta$  18.13. HRMS (ESI): Calcd for C<sub>20</sub>H<sub>25</sub>ClNO<sub>3</sub>NaP [M + Na]<sup>+</sup>: 416.1158, Found: 416.1159.

**(E)-diethyl (3-(2-amino-3,5-dibromophenyl)-3-phenylprop-1-en-1-yl)phosphonate (2o):**

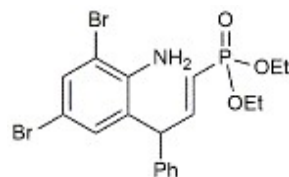

Yellow solid (94%, 470mg, M.P. 87-90 °C);  $^1\text{H}$  NMR (400 MHz, DMSO- $d_6$ )  $\delta$  7.70 (d,  $J$  = 2.3 Hz, 1H), 7.46 – 7.40 (m, 2H), 7.40 – 7.30 (m, 3H), 7.30 – 7.24 (m, 1H), 6.90 (d,  $J$  = 8.9 Hz, 1H), 6.67 (ddd,  $J$  = 16.0, 4.9, 1.2 Hz, 1H), 6.30 (ddd,  $J$  = 15.9, 6.5, 4.8 Hz, 1H), 5.04 (dd,  $J$  = 9.0, 6.8 Hz, 1H), 4.93 (dddd,  $J$  = 24.3, 8.5, 6.5, 1.4 Hz, 1H), 4.18 – 4.06 (m, 4H), 1.24 (t,  $J$  = 7.0 Hz, 6H).  $^{13}\text{C}$   $\{^1\text{H}\}$  NMR (101 MHz, DMSO- $d_6$ )  $\delta$  143.1 (d,  $J$  = 12.1 Hz), 136.2 (d,  $J$  = 2.0 Hz), 134.2, 132.7, 132.6, 131.6, 129.2, 128.4, 126.8, 123.7 (d,  $J$  = 5.0 Hz), 115.1, 108.9 (d,  $J$  = 162.6 Hz), 63.2 (d,  $J$  = 6.0 Hz), 63.1 (d,  $J$  = 6.0 Hz), 52.1 (d,  $J$  = 51.5 Hz), 16.8 (d,  $J$  = 5.0 Hz), 16.7 (d,  $J$  = 5.0 Hz).  $^{31}\text{P}$   $\{^1\text{H}\}$  NMR (162 MHz, DMSO- $d_6$ )  $\delta$  21.72. HRMS(ESI): Calcd for  $\text{C}_{19}\text{H}_{22}\text{Br}_2\text{NO}_3\text{NaP}$   $[\text{M} + \text{Na}]^+$ : 523.9602, Found: 523.9602.

**(E)-diethyl (3-(2-amino-6-methoxyphenyl)-3-phenylprop-1-en-1-yl)phosphonate (2p):**

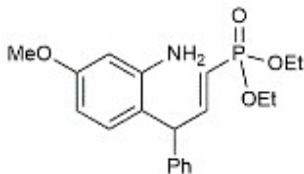

White waxy solid (75%, 281mg);  $^1\text{H}$  NMR (400 MHz, DMSO- $d_6$ )  $\delta$  7.39 – 7.32 (m, 2H), 7.28 – 7.23 (m, 1H), 7.19 – 7.14 (m, 2H), 7.04 – 6.90 (m, 1H), 6.67 (d,  $J$  = 8.4 Hz, 1H), 6.26 (d,  $J$  = 2.6 Hz, 1H), 6.16 (dd,  $J$  = 8.5, 2.6 Hz, 1H), 5.52 (ddd,  $J$  = 21.0, 17.0, 1.5 Hz, 1H), 5.00 (dt,  $J$  = 6.6, 1.9 Hz, 1H), 4.97 (s, 2H,  $\text{NH}_2$ ), 3.97 (dq,  $J$  = 8.3, 7.1, 3.1 Hz, 4H), 3.66 (s, 3H), 1.22 (td,  $J$  = 7.0, 2.5 Hz, 6H).  $^{13}\text{C}$   $\{^1\text{H}\}$  NMR (101 MHz, DMSO- $d_6$ )  $\delta$  159.3, 154.0 (d,  $J$  = 6.0 Hz), 147.5, 141.6, 129.6, 128.9, 128.8, 127.0, 117.6, 117.2 (d,  $J$  = 184.8 Hz), 102.5, 100.8, 61.6 (d,  $J$  = 5.0 Hz), 55.0, 47.8 (d,  $J$  = 21.2 Hz), 16.6 (d,  $J$  = 5.0 Hz).  $^{31}\text{P}$   $\{^1\text{H}\}$  NMR (162 MHz, DMSO- $d_6$ )  $\delta$  18.08; HRMS(ESI): Calcd for  $\text{C}_{20}\text{H}_{26}\text{NO}_4\text{NaP}$   $[\text{M} + \text{Na}]^+$ : 398.1497, Found: 398.1494.

**(E)-diethyl (3-(6-amino-2,3-dimethoxyphenyl)-3-phenylprop-1-en-1-yl)phosphonate (2q):**

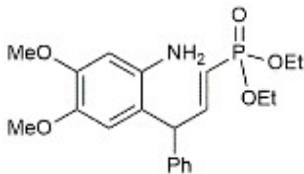

Whitewaxy solid (97%, 393mg);  $^1\text{H}$  NMR (400 MHz,  $\text{DMSO-}d_6$ )  $\delta$  7.39 – 7.33 (m, 2H), 7.29 – 7.21 (m, 3H), 7.07 (ddd,  $J = 21.3, 17.0, 6.8$  Hz, 1H), 6.48 (d,  $J = 3.5$  Hz, 2H), 5.65 (ddd,  $J = 21.0, 17.0, 1.4$  Hz, 1H), 5.08 (dt,  $J = 7.0, 1.9$  Hz, 1H), 4.05 – 3.98 (m, 4H), 3.71 (s, 3H), 3.60 (s, 3H), 1.24 (td,  $J = 7.0, 3.6$  Hz, 6H).  $^{13}\text{C}$   $\{^1\text{H}\}$  NMR (101 MHz,  $\text{DMSO-}d_6$ )  $\delta$  153.8 (d,  $J = 5.0$  Hz), 149.4, 141.6, 140.9, 140.6, 128.9, 128.8, 127.0, 117.6 (d,  $J = 184.8$  Hz), 116.5, 115.2, 101.7, 61.6 (d,  $J = 6.0$  Hz), 57.3, 55.7, 48.3 (d,  $J = 22.2$  Hz), 16.5 (d,  $J = 6.0$  Hz).  $^{31}\text{P}$   $\{^1\text{H}\}$  NMR (162 MHz,  $\text{DMSO-}d_6$ )  $\delta$  18.04; HRMS(ESI): Calcd for  $\text{C}_{21}\text{H}_{28}\text{NO}_5\text{NaP}$   $[\text{M} + \text{Na}]^+$ : 428.1603, Found: 428.1598.

**(E)-diethyl (3-(6-amino-2-chloro-3-fluorophenyl)-3-phenylprop-1-en-1-yl)phosphonate (2r):**

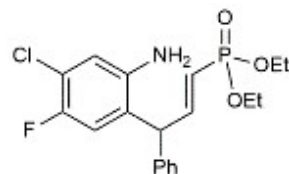

Whitewaxy solid (91%, 361mg);  $^1\text{H}$  NMR (400 MHz,  $\text{DMSO-}d_6$ )  $\delta$  7.41 – 7.35 (m, 2H), 7.32 – 7.27 (m, 1H), 7.25 – 7.20 (m, 2H), 7.00 (ddd,  $J = 21.1, 17.0, 6.9$  Hz, 1H), 6.82 (d,  $J = 6.8$  Hz, 1H), 6.76 (d,  $J = 10.5$  Hz, 1H), 5.64 (ddd,  $J = 20.4, 17.0, 1.4$  Hz, 1H), 5.20 (s, 2H), 5.09 (d,  $J = 6.9$  Hz, 1H), 4.03 – 3.94 (m, 4H), 1.23 (td,  $J = 7.3, 1.5$  Hz, 6H).  $^{13}\text{C}$   $\{^1\text{H}\}$  NMR (101 MHz,  $\text{DMSO-}d_6$ )  $\delta$  152.2 (d,  $J = 6.0$  Hz), 148.2 (d,  $J = 234.3$  Hz), 143.9, 140.4, 129.2, 128.8, 127.5, 125.3 (d,  $J = 5.0$  Hz), 118.4 (d,  $J = 183.8$  Hz), 118.0 (d,  $J = 18.1$  Hz), 116.4 (d,  $J = 22.2$  Hz), 115.8, 61.7 (d,  $J = 5.0$  Hz), 47.9 (d,  $J = 22.2$  Hz), 16.6 (d,  $J = 6.0$  Hz).  $^{31}\text{P}$   $\{^1\text{H}\}$  NMR (162 MHz,  $\text{DMSO-}d_6$ )  $\delta$  17.49; HRMS(ESI): Calcd for  $\text{C}_{19}\text{H}_{22}\text{ClFNO}_3\text{NaP}$   $[\text{M} + \text{Na}]^+$ : 420.0908, Found: 420.0906.

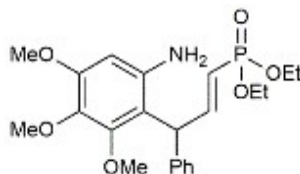

**(E)-diethyl (3-(6-amino-2,3,4-trimethoxyphenyl)-3-phenylprop-1-en-1-yl)phosphonate (2s):**

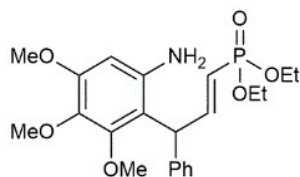

2s

$^1\text{H}$  NMR (400 MHz,  $\text{DMSO-}d_6$ )  $\delta$  7.33 (t,  $J = 7.6$  Hz, 2H), 7.23 (dt,  $J = 7.8, 2.3$  Hz, 1H), 7.18 – 7.12 (m, 2H), 6.21 (s, 1H), 5.83 (ddd,  $J = 21.5, 17.0, 1.2$  Hz, 1H), 5.15 (d,  $J = 7.7$  Hz, 1H), 4.74 (s, 2H), 4.00 (ddq,  $J = 9.6, 8.4, 7.0$  Hz, 4H), 3.73 (s, 3H), 3.63 (s, 3H), 3.41 (s, 3H), 1.24 (dt,  $J = 9.8, 7.0$  Hz, 6H).  $^{13}\text{C}$  NMR (101 MHz,  $\text{DMSO-}d_6$ )  $\delta$  153.11(d,  $J = 5.0$  Hz), 153.07, 152.47, 142.92, 142.58, 133.56, 128.78, 127.53, 126.59, 117.25(d,  $J = 183.8$  Hz), 111.01, 96.12, 61.58(d,  $J = 6.0$  Hz), 61.55(d,  $J = 6.0$  Hz), 60.45(d,  $J = 28.2$  Hz), 55.74, 45.31(d,  $J = 23.2$  Hz), 16.65(d,  $J = 6.0$  Hz), 16.62(d,  $J = 5.0$  Hz).  $^{31}\text{P}$  NMR (162 MHz,  $\text{DMSO-}d_6$ )  $\delta$  18.34.

**(E)-diethyl (3-(2-amino-3-methylphenyl)-3-(4-methoxyphenyl)prop-1-en-1-yl)phosphonate (2t):**

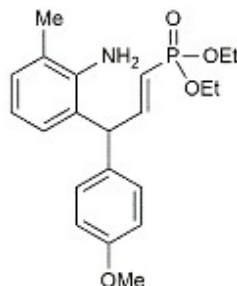

Yellow viscous oil (87%, 338mg).  $^1\text{H}$  NMR (400 MHz,  $\text{DMSO-}d_6$ )  $\delta$  7.09 (dd,  $J = 9.3, 2.6$  Hz, 2H), 7.06 – 6.96 (m, 1H), 6.94 – 6.87 (m, 2H), 6.79 – 6.69 (m, 2H), 6.60 (d,  $J = 8.0$  Hz, 1H), 5.63 (ddd,  $J = 21.1, 16.9, 1.4$  Hz, 1H), 4.88 – 4.72 (m, 3H,  $\text{NH}_2 + \text{CH}$ ), 3.97 (dq,  $J = 8.4, 7.0$  Hz, 4H), 3.74 (s, 3H), 2.04 (s, 3H), 1.23 (t,  $J = 7.1$  Hz, 6H).  $^{13}\text{C}$  { $^1\text{H}$ } NMR (101 MHz,  $\text{DMSO-}d_6$ )  $\delta$  158.2, 155.2 (d,  $J = 5.0$  Hz), 145.7, 134.9, 130.1, 129.5, 126.6, 121.6, 116.8 (d,  $J = 183.8$  Hz), 114.5, 114.3, 61.5 (d,  $J = 6.0$  Hz), 55.4, 53.1 (d,  $J = 21.2$  Hz), 18.0, 16.6 (d,  $J = 6.0$  Hz);  $^{31}\text{P}$  { $^1\text{H}$ } NMR (162 MHz,  $\text{DMSO-}d_6$ )  $\delta$  18.25 ppm.

**(E)-diisopropyl (3-(2-amino-3-methylphenyl)-3-(4-methoxyphenyl)prop-1-en-1-yl)phosphonate (2u):**

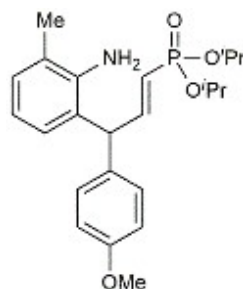

Yellow viscous liquid (85%, 354mg)  $^1\text{H}$  NMR (400 MHz,  $\text{DMSO-}d_6$ )  $\delta$  7.11 – 7.05 (m, 2H), 7.05 – 6.86 (m, 3H), 6.78 – 6.67 (m, 2H), 6.60 (d,  $J = 8.1$  Hz, 1H), 5.59 (ddd,  $J = 20.7, 16.9, 1.4$  Hz, 1H), 5.05 – 4.65 (m, 3H,  $\text{NH}_2 + \text{CH}$ ), 4.51 (dp,  $J = 8.1, 6.2$  Hz, 2H), 3.73 (s, 3H), 2.04 (s, 3H), 1.23

(dd,  $J = 12.5, 6.2$  Hz, 12H).  $^{13}\text{C}$   $\{^1\text{H}\}$  NMR (101 MHz, DMSO- $d_6$ )  $\delta$  158.2, 154.4 (d,  $J = 6.0$  Hz), 145.7, 134.9, 130.1, 129.5, 126.6, 121.6, 118.3 (d,  $J = 183.8$  Hz), 114.5, 114.3, 69.9 (d,  $J = 5.0$  Hz), 55.4, 52.9 (d,  $J = 22.2$  Hz), 24.1 (d,  $J = 4.0$  Hz), 24.0 (d,  $J = 5.0$  Hz);  $^{31}\text{P}$   $\{^1\text{H}\}$  NMR (162 MHz, DMSO- $d_6$ )  $\delta$  16.32 ppm.

**(E)-diethyl (4-(2-amino-5-methoxyphenyl)-4-phenylbut-2-en-2-yl)phosphonate (2v):**

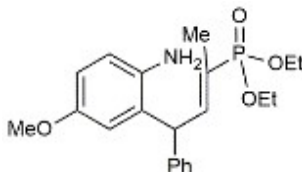

Whites solid (92%, 358mg, M.P. 141-144 °C).  $^1\text{H}$  NMR (400 MHz, DMSO- $d_6$ )  $\delta$  7.38 – 7.29 (m, 2H), 7.28 – 7.18 (m, 3H), 6.88 – 6.72 (m, 1H), 6.68 – 6.59 (m, 2H), 6.59 – 6.52 (m, 1H), 5.14 (dd,  $J = 9.1, 3.2$  Hz, 1H), 4.45 (d,  $J = 4.6$  Hz, 2H), 4.04 – 3.89 (m, 4H), 3.66 – 3.58 (m, 3H), 1.86 – 1.75 (m, 3H), 1.27 – 1.18 (m, 6H).  $^{13}\text{C}$   $\{^1\text{H}\}$  NMR (101 MHz, DMSO- $d_6$ )  $\delta$  151.5, 147.3 (d,  $J = 10.1$  Hz), 142.7, 140.0, 129.0, 128.2, 127.7, 126.9, 125.2 (d,  $J = 175.7$  Hz), 117.0, 114.4, 112.9, 61.6 (d,  $J = 5.0$  Hz), 55.6, 43.8 (d,  $J = 19.1$  Hz), 16.6 (d,  $J = 6.0$  Hz), 13.3 (d,  $J = 10.1$  Hz).  $^{31}\text{P}$   $\{^1\text{H}\}$  NMR (162 MHz, DMSO- $d_6$ )  $\delta$  20.63 ppm; HRMS(ESI): Calcd for  $\text{C}_{21}\text{H}_{28}\text{NO}_4\text{NaP}$   $[\text{M} + \text{Na}]^+$ : 412.1654, Found: 412.1649.

**(E and Z)-diethyl (3-(2-amino-5-methoxyphenyl)-2-methyl-3-phenylprop-1-en-1-yl)phosphonate (2w and 2x):**

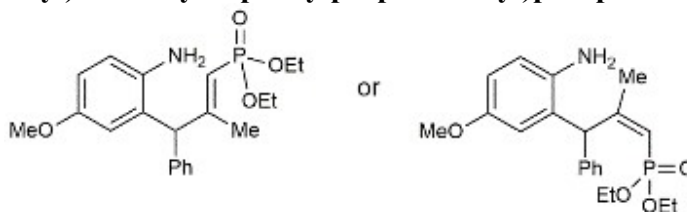

**2v:** Whitewaxy solid (95%, 365mg).  $^1\text{H}$  NMR (400 MHz, DMSO- $d_6$ )  $\delta$  7.37 (dd,  $J = 8.1, 6.8$  Hz, 2H), 7.31 – 7.24 (m, 1H), 7.14 – 7.09 (m, 2H), 6.68 – 6.60 (m, 2H), 6.16 (d,  $J = 2.6$  Hz, 1H), 6.00 (s, 1H), 5.91 (dq,  $J = 17.7, 1.2$  Hz, 1H), 4.78 (s, 2H,  $\text{NH}_2$ ), 4.01 – 3.92 (m, 2H), 3.80 – 3.70 (m, 2H), 3.53 (s, 3H), 1.78 (dd,  $J = 1.4, 0.7$  Hz, 3H), 1.20 (t,  $J = 7.1$  Hz, 3H), 0.94 (t,  $J = 7.0$  Hz, 3H).  $^{13}\text{C}$   $\{^1\text{H}\}$  NMR (101 MHz, DMSO- $d_6$ )  $\delta$  160.9 (d,  $J = 7.0$  Hz), 150.6, 141.7, 141.2, 128.8, 128.7, 126.8, 125.4, 116.4, 116.1 (d,  $J = 183.8$  Hz), 116.0, 113.2, 61.5 (d,  $J = 6.0$  Hz), 61.4 (d,  $J = 5.0$  Hz), 55.6, 48.0 (d,  $J = 6.0$  Hz), 23.8 (d,  $J = 23.2$  Hz), 16.5 (d,  $J = 6.0$  Hz), 16.1 (d,  $J = 7.0$  Hz).  $^{31}\text{P}$   $\{^1\text{H}\}$  NMR (162 MHz, DMSO- $d_6$ )  $\delta$  16.72. HRMS(ESI): Calcd for  $\text{C}_{21}\text{H}_{28}\text{NO}_4\text{NaP}$   $[\text{M} + \text{Na}]^+$ : 412.1654, Found: 412.1650.

**2w:** White solid (95%, 365mg, M.P. 127-130 °C),  $^1\text{H}$  NMR (400 MHz, DMSO- $d_6$ )  $\delta$  7.38 (t,  $J = 7.4$  Hz, 2H), 7.33 – 7.25 (m, 1H), 7.17 – 7.10 (m, 2H), 6.70 – 6.62 (m, 2H), 6.26 – 6.19 (m, 1H), 5.04 – 4.94 (m, 2H), 4.48 (s, 2H,  $\text{NH}_2$ ), 3.99 – 3.88 (m, 4H), 3.58 (s, 3H), 2.10 – 2.04 (m, 3H), 1.21

(td,  $J = 7.0, 5.0$  Hz, 6H).  $^{13}\text{C}$   $\{^1\text{H}\}$  NMR (101 MHz, DMSO- $d_6$ )  $\delta$  163.1 (d,  $J = 8.0$  Hz), 151.1, 140.5, 140.5, 129.6, 129.0, 127.3, 126.0, 116.8, 115.2, 114.0 (d,  $J = 186.8$  Hz), 112.9, 61.2 (d,  $J = 6.0$  Hz), 61.1 (d,  $J = 6.0$  Hz), 55.5, 54.9 (d,  $J = 21.2$  Hz), 21.1 (d,  $J = 7.0$  Hz), 16.6 (d,  $J = 6.0$  Hz).  $^{31}\text{P}$   $\{^1\text{H}\}$  NMR (162 MHz, DMSO- $d_6$ )  $\delta$  17.80. HRMS(ESI): Calcd for  $\text{C}_{21}\text{H}_{28}\text{NO}_4\text{NaP}$   $[\text{M} + \text{Na}]^+$ : 412.1654, Found: 412.1652.

**(E)-diethyl (3-(2-(methylamino)phenyl)-3-phenylprop-1-en-1-yl)phosphonate (2y):**

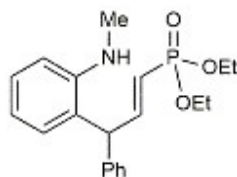

Dark orangewaxysolid (96%, 344mg).  $^1\text{H}$  NMR (400 MHz, DMSO- $d_6$ )  $\delta$  7.40 – 7.32 (m, 2H), 7.30 – 7.24 (m, 1H), 7.21 – 7.16 (m, 2H), 7.13 (ddd,  $J = 8.2, 7.4, 1.7$  Hz, 1H), 7.00 (ddd,  $J = 21.2, 17.0, 6.5$  Hz, 1H), 6.81 (dd,  $J = 7.6, 1.6$  Hz, 1H), 6.64 – 6.54 (m, 2H), 5.50 (ddd,  $J = 20.8, 17.0, 1.5$  Hz, 1H), 5.17 (d,  $J = 5.3$  Hz, 1H), 5.12 (dt,  $J = 6.7, 1.9$  Hz, 1H), 3.97 (dq,  $J = 8.4, 7.2, 4.0$  Hz, 4H), 2.71 (d,  $J = 3.0$  Hz, 3H), 1.24 – 1.19 (m, 6H).  $^{13}\text{C}$   $\{^1\text{H}\}$  NMR (101 MHz, DMSO- $d_6$ )  $\delta$  153.8 (d,  $J = 5.0$  Hz), 147.1, 141.1, 129.2, 129.0, 128.6, 128.3, 127.2, 125.3, 117.6 (d,  $J = 183.7$  Hz), 116.1, 110.2, 61.6 (d,  $J = 5.0$  Hz), 47.8 (d,  $J = 21.2$  Hz), 30.6, 16.6 (d,  $J = 6.0$  Hz).  $^{31}\text{P}$   $\{^1\text{H}\}$  NMR (162 MHz, DMSO- $d_6$ )  $\delta$  17.89. HRMS(ESI): Calcd for  $\text{C}_{20}\text{H}_{26}\text{NO}_3\text{NaP}$   $[\text{M} + \text{Na}]^+$ : 382.1548, Found: 382.1543.

**(E)-diethyl (3-(2-amino-4-nitrophenyl)-3-phenylprop-1-en-1-yl)phosphonate (2cc):**

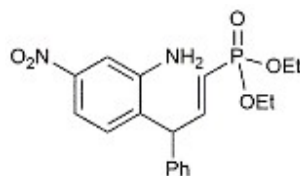

Dark orangewaxy solid (43%, 167mg).  $^1\text{H}$  NMR (400 MHz, Chloroform- $d$ )  $\delta$  7.56 (dd,  $J = 7.9, 2.1$  Hz, 1H), 7.44 (t,  $J = 2.3$  Hz, 1H), 7.41 (dd,  $J = 6.9, 2.0$  Hz, 1H), 7.38 – 7.31 (m, 3H), 7.31 – 7.24 (m, 1H), 7.08 – 6.87 (m, 2H), 5.97 (ddd,  $J = 18.9, 17.1, 1.6$  Hz, 1H), 5.19 – 5.09 (m, 1H), 4.12 – 4.00 (m, 4H), 1.32 – 1.26 (m, 6H).  $^{13}\text{C}$   $\{^1\text{H}\}$  NMR (101 MHz, Chloroform- $d$ )  $\delta$  150.6 (d,  $J = 6.0$  Hz), 149.2, 147.3, 138.5, 129.7, 129.2, 128.6,



127.4, 119.5, 117.3 (d,  $J = 187.8$  Hz), 112.7, 107.4, 62.1 (d,  $J = 5.0$  Hz), 62.0 (d,  $J = 5.0$  Hz), 60.4 (d,  $J = 22.2$  Hz), 16.3 (d,  $J = 6.0$  Hz), 16.2 (d,  $J = 6.0$  Hz).  $^{31}\text{P}$   $\{^1\text{H}\}$  NMR (162 MHz, DMSO- $d_6$ )  $\delta$  17.69. HRMS(ESI): Calcd for  $\text{C}_{19}\text{H}_{23}\text{N}_2\text{O}_5\text{NaP}$   $[\text{M} + \text{Na}]^+$ : 413.1242, Found:.

**(E)-diethyl (3-(2-amino-5-methoxyphenyl)-3-(2-nitrophenyl)allyl)phosphonate(3dd):**

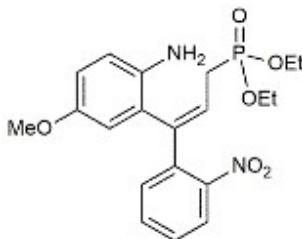

Orange viscous liquid (72%, 302.5 mg).  $^1\text{H}$  NMR (400 MHz, DMSO- $d_6$ )  $\delta$  7.93 (dd,  $J = 8.2, 1.3$  Hz, 1H), 7.63 (td,  $J = 7.6, 1.4$  Hz, 1H), 7.51 – 7.46 (m, 1H), 7.33 (dd,  $J = 7.9, 1.4$  Hz, 1H), 6.68 (dd,  $J = 3.3, 1.5$  Hz, 2H), 6.59 (dq,  $J = 2.2, 1.3, 0.9$  Hz, 1H), 5.37 (s, 1H), 4.62 (d,  $J = 4.4$  Hz, 1H), 4.02 – 3.91 (m, 5H), 3.59 (s, 3H), 2.13 (dd,  $J = 17.4, 6.6$  Hz, 2H), 1.21 – 1.16 (m, 6H).  $^{13}\text{C}$   $\{^1\text{H}\}$  NMR (101 MHz, DMSO- $d_6$ )  $\delta$  153.1, 149.4, 144.7, 138.0, 133.8, 131.5, 130.2, 124.4, 114.0, 111.8, 110.6, 63.4 (d,  $J = 3.0$  Hz), 61.6 (d,  $J = 7.0$  Hz), 61.5 (d,  $J = 7.0$  Hz), 55.7, 50.0 (d,  $J = 13.1$  Hz) 31.1 (d,  $J = 136.3$  Hz), 16.5 (d,  $J = 6.0$  Hz).  $^{31}\text{P}$   $\{^1\text{H}\}$  NMR (162 MHz, DMSO- $d_6$ )  $\delta$  28.27 ppm; HRMS(ESI): Calcd for  $\text{C}_{20}\text{H}_{25}\text{N}_2\text{O}_6\text{NaP}$   $[\text{M} + \text{Na}]^+$ : 443.1348, Found: 443.1347.

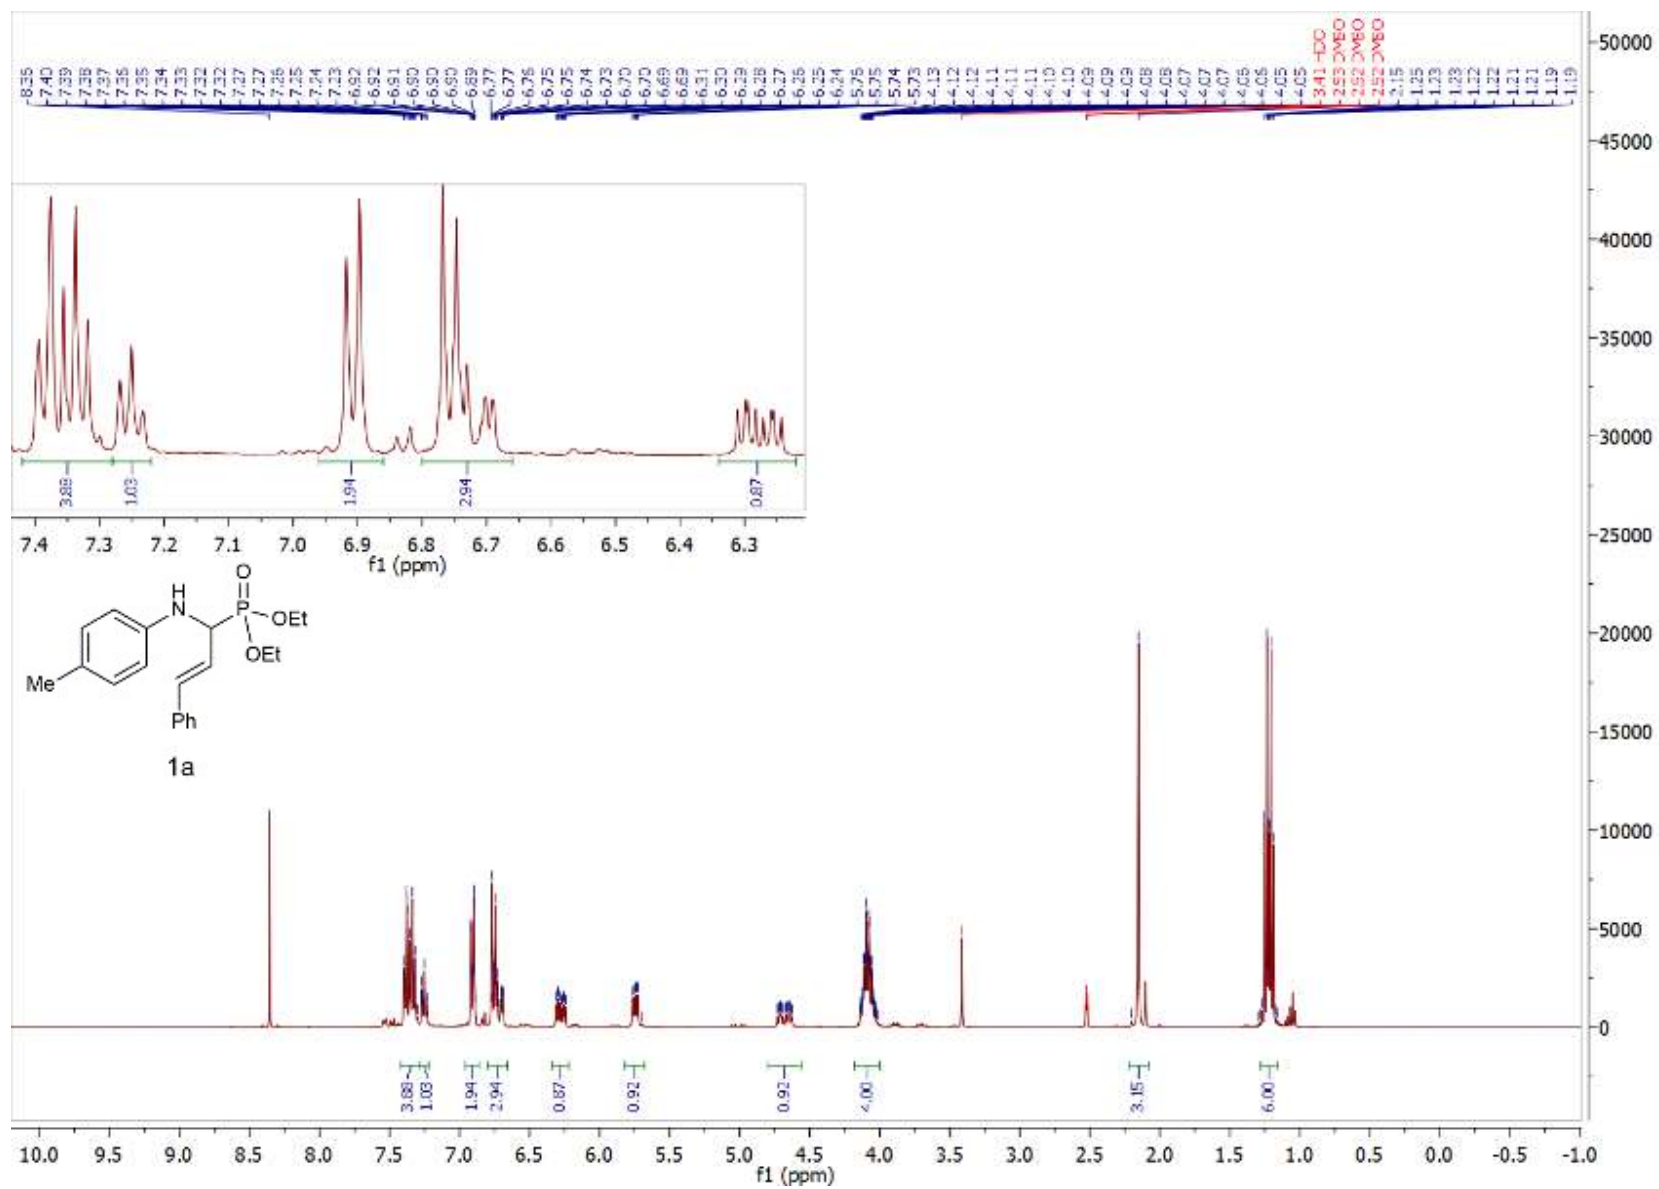

Figure S1: <sup>1</sup>H NMR Spectra of 1a

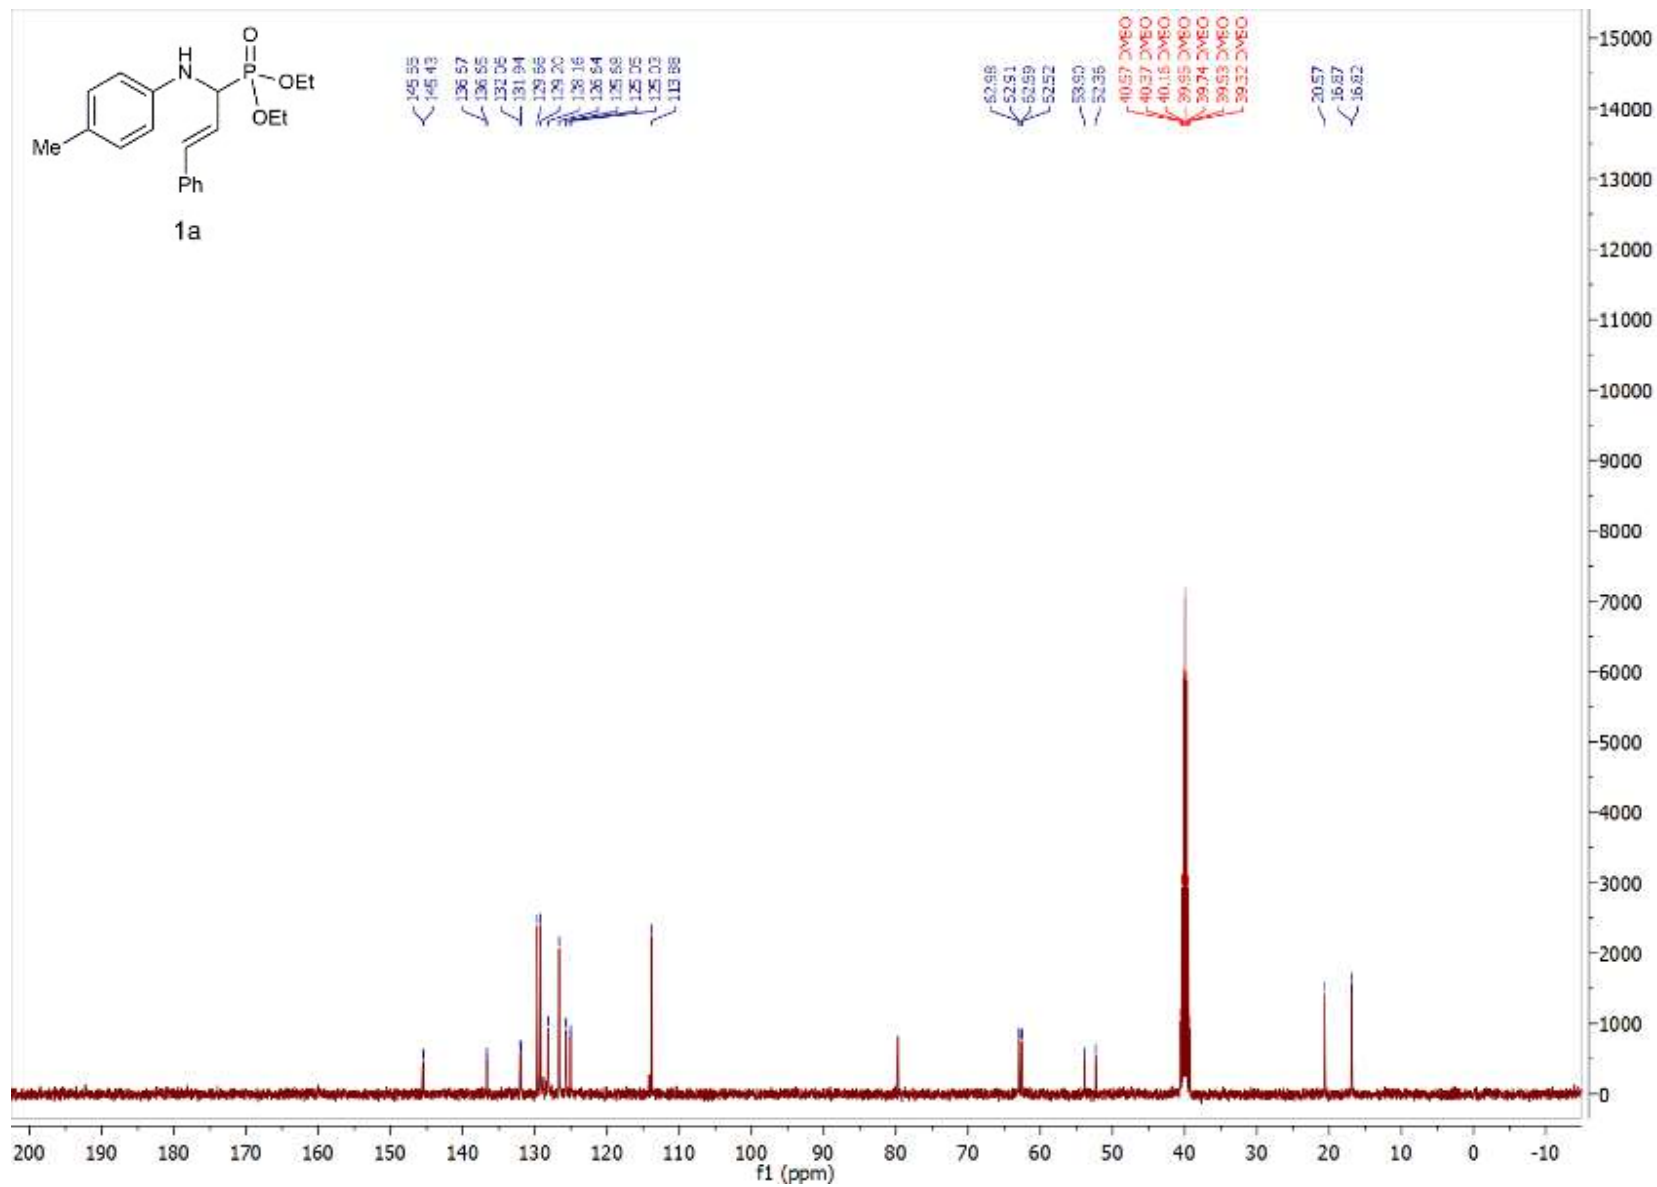

Figure S2:  $^{13}\text{C}$  NMR Spectra of 1a

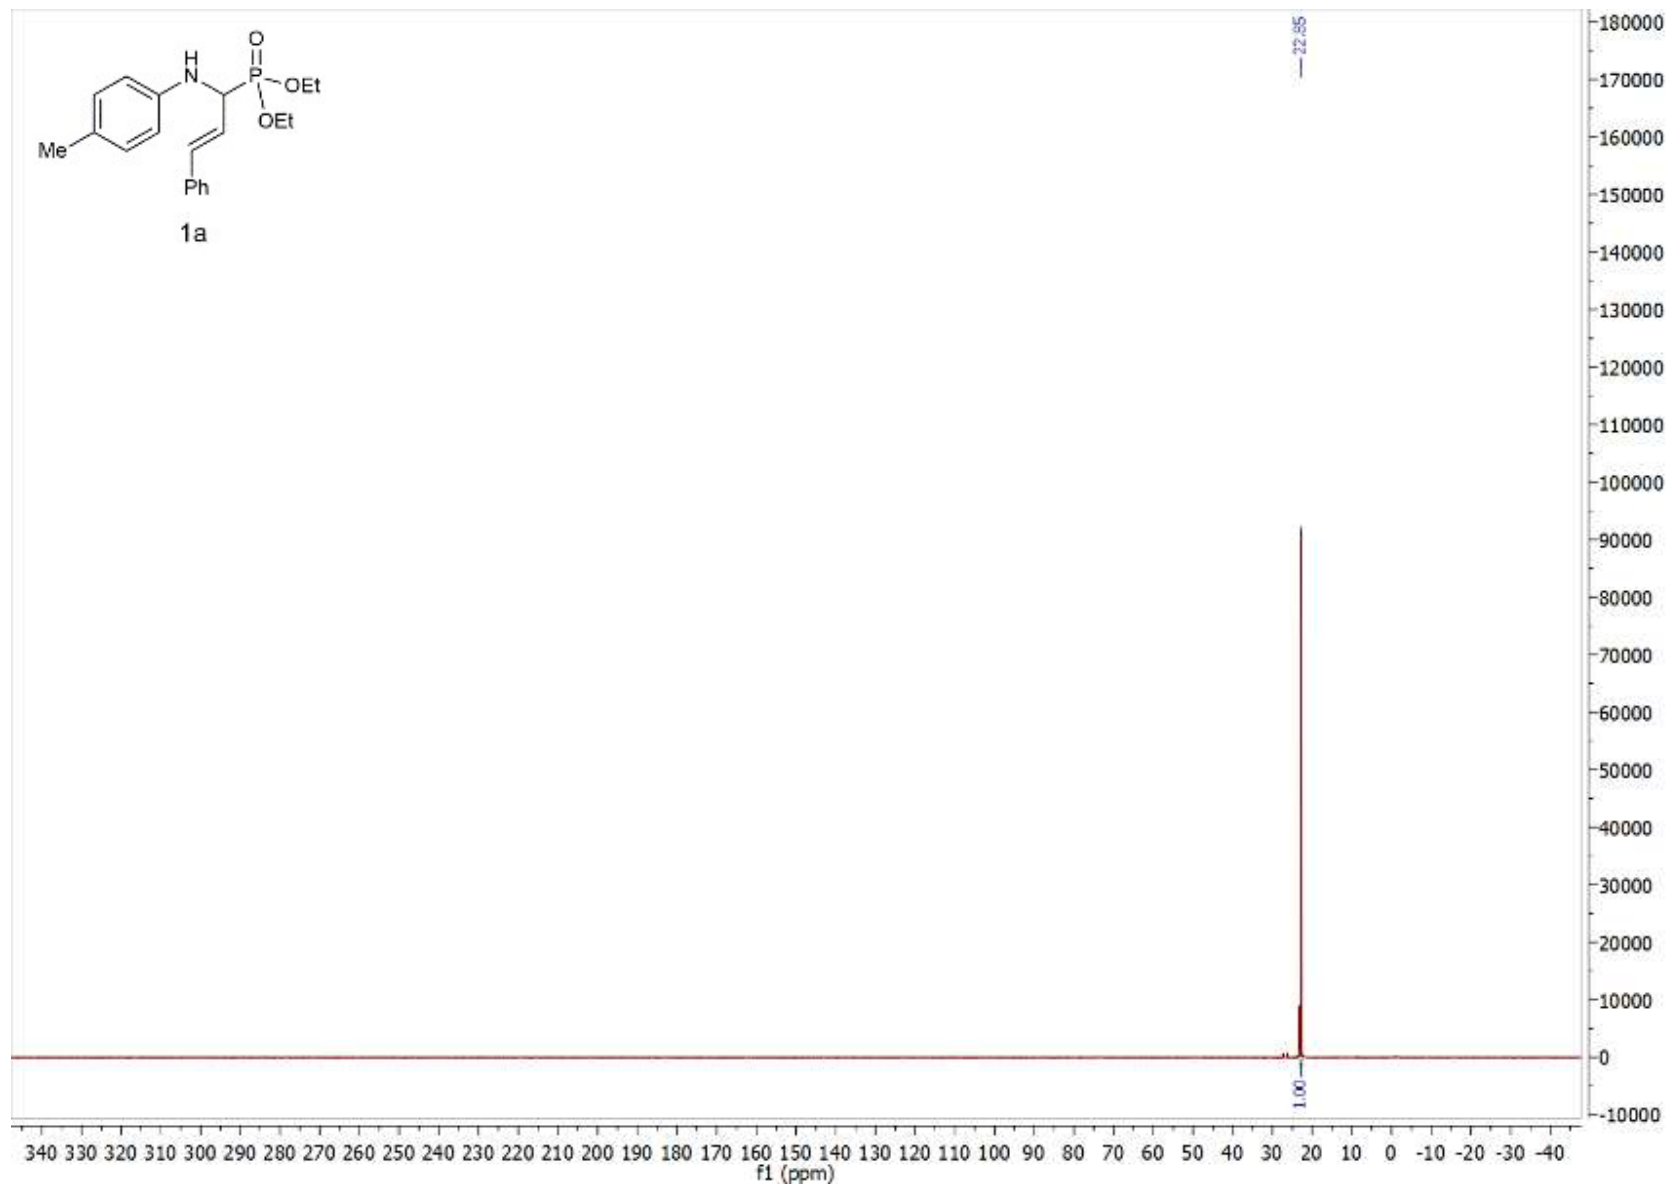

Figure S3:  $^{31}\text{P}$  NMR Spectra of 1a

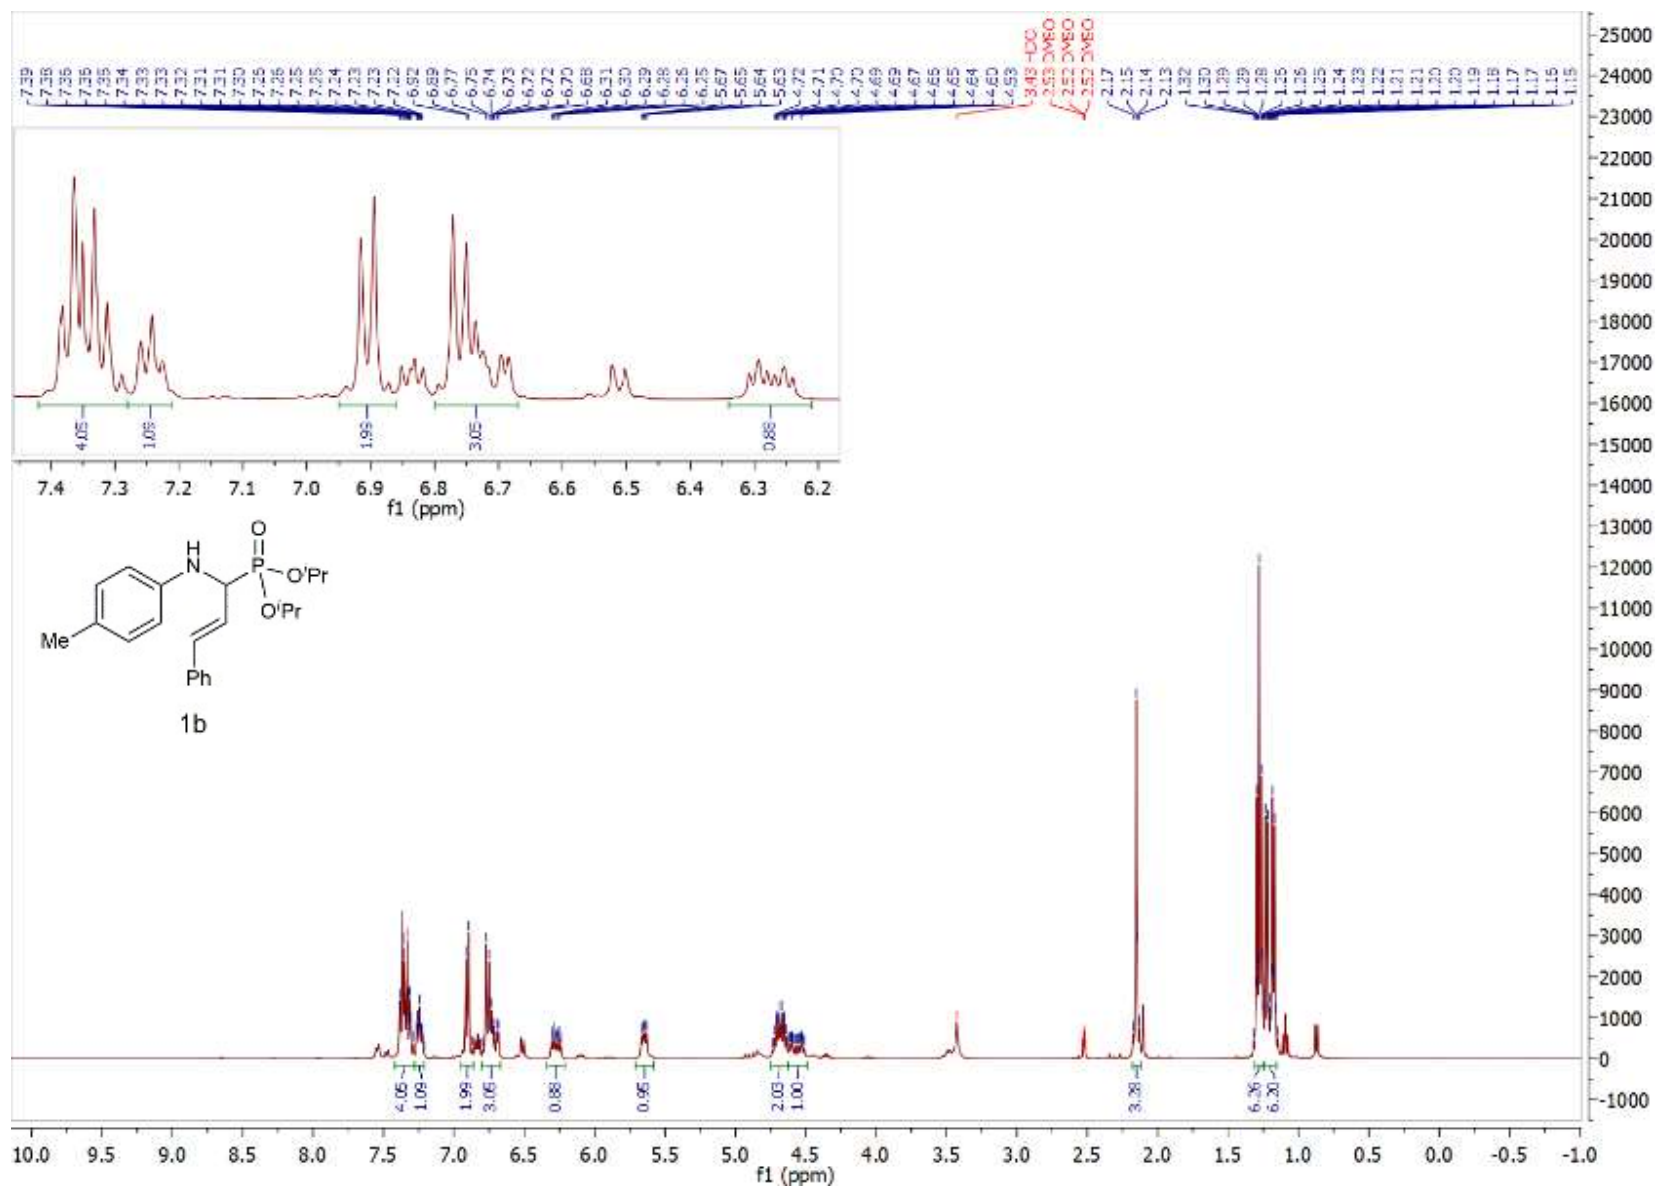

Figure S4: <sup>1</sup>H NMR Spectra of **1b**

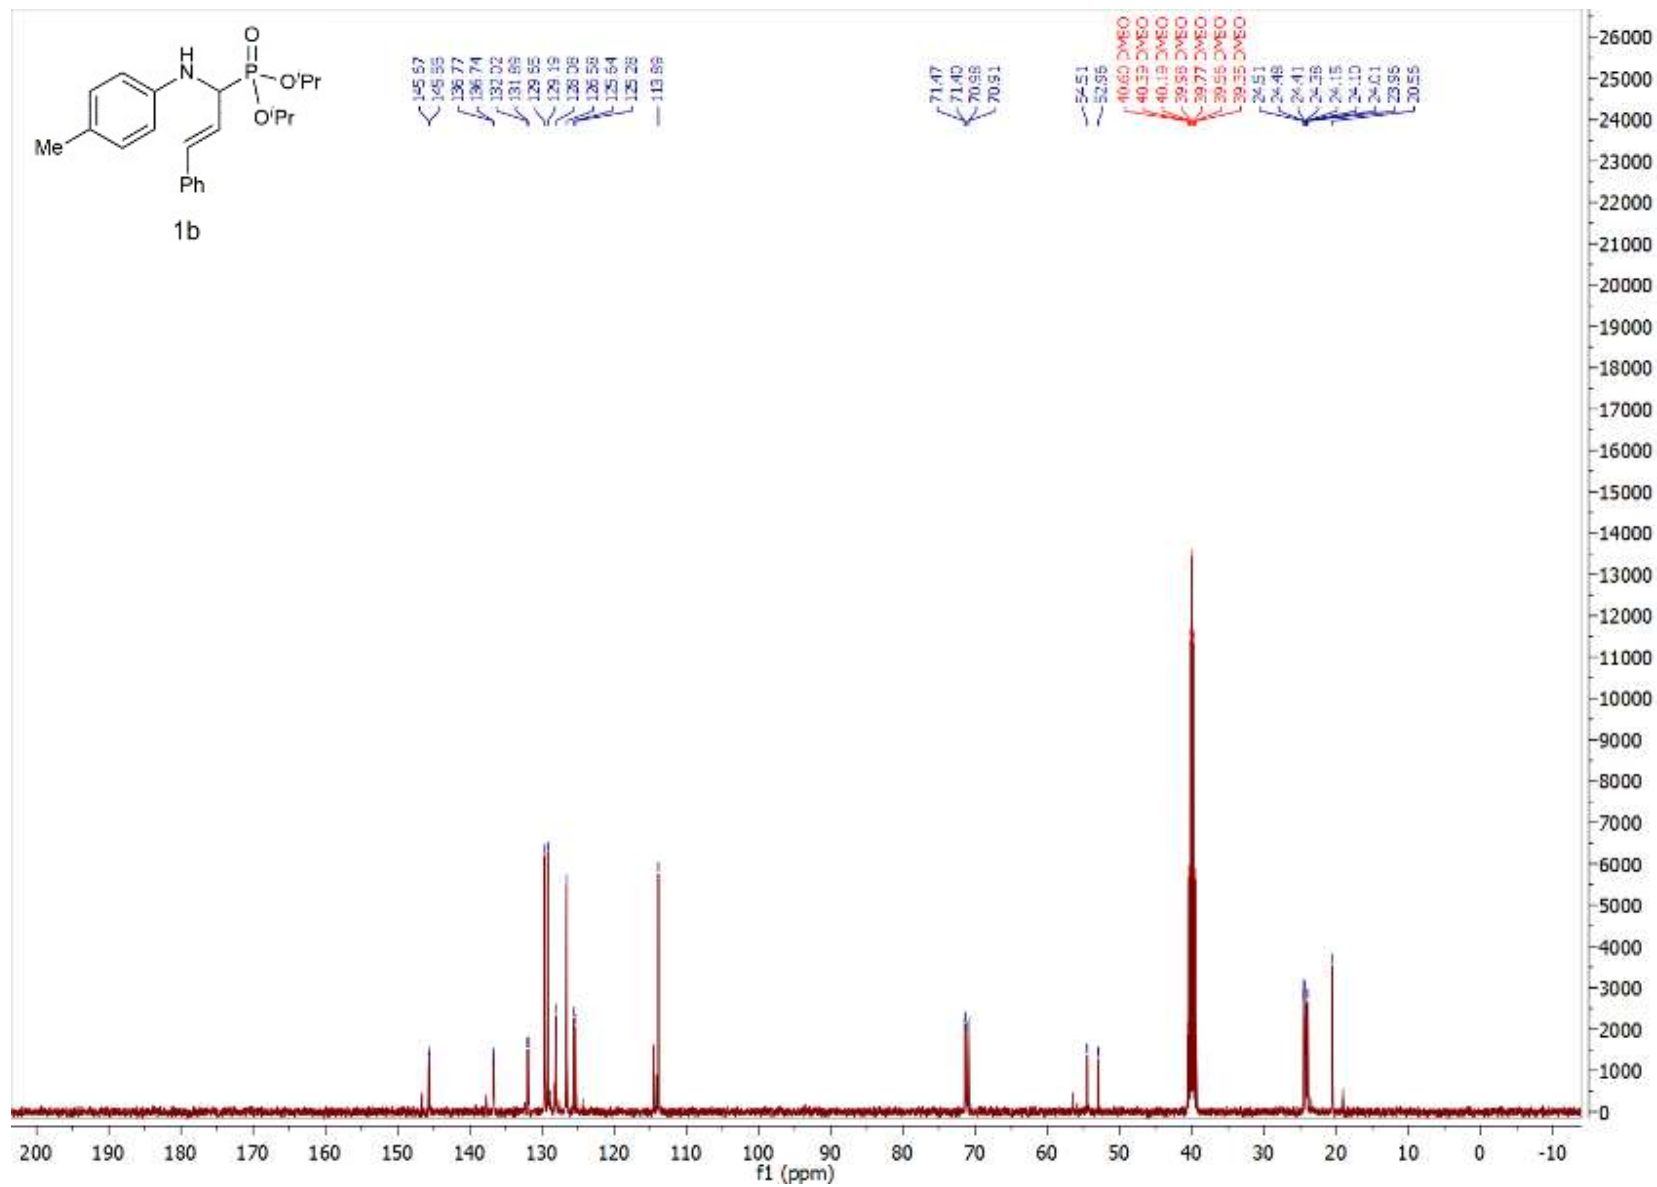

Figure S5: <sup>13</sup>C NMR Spectra of 1b

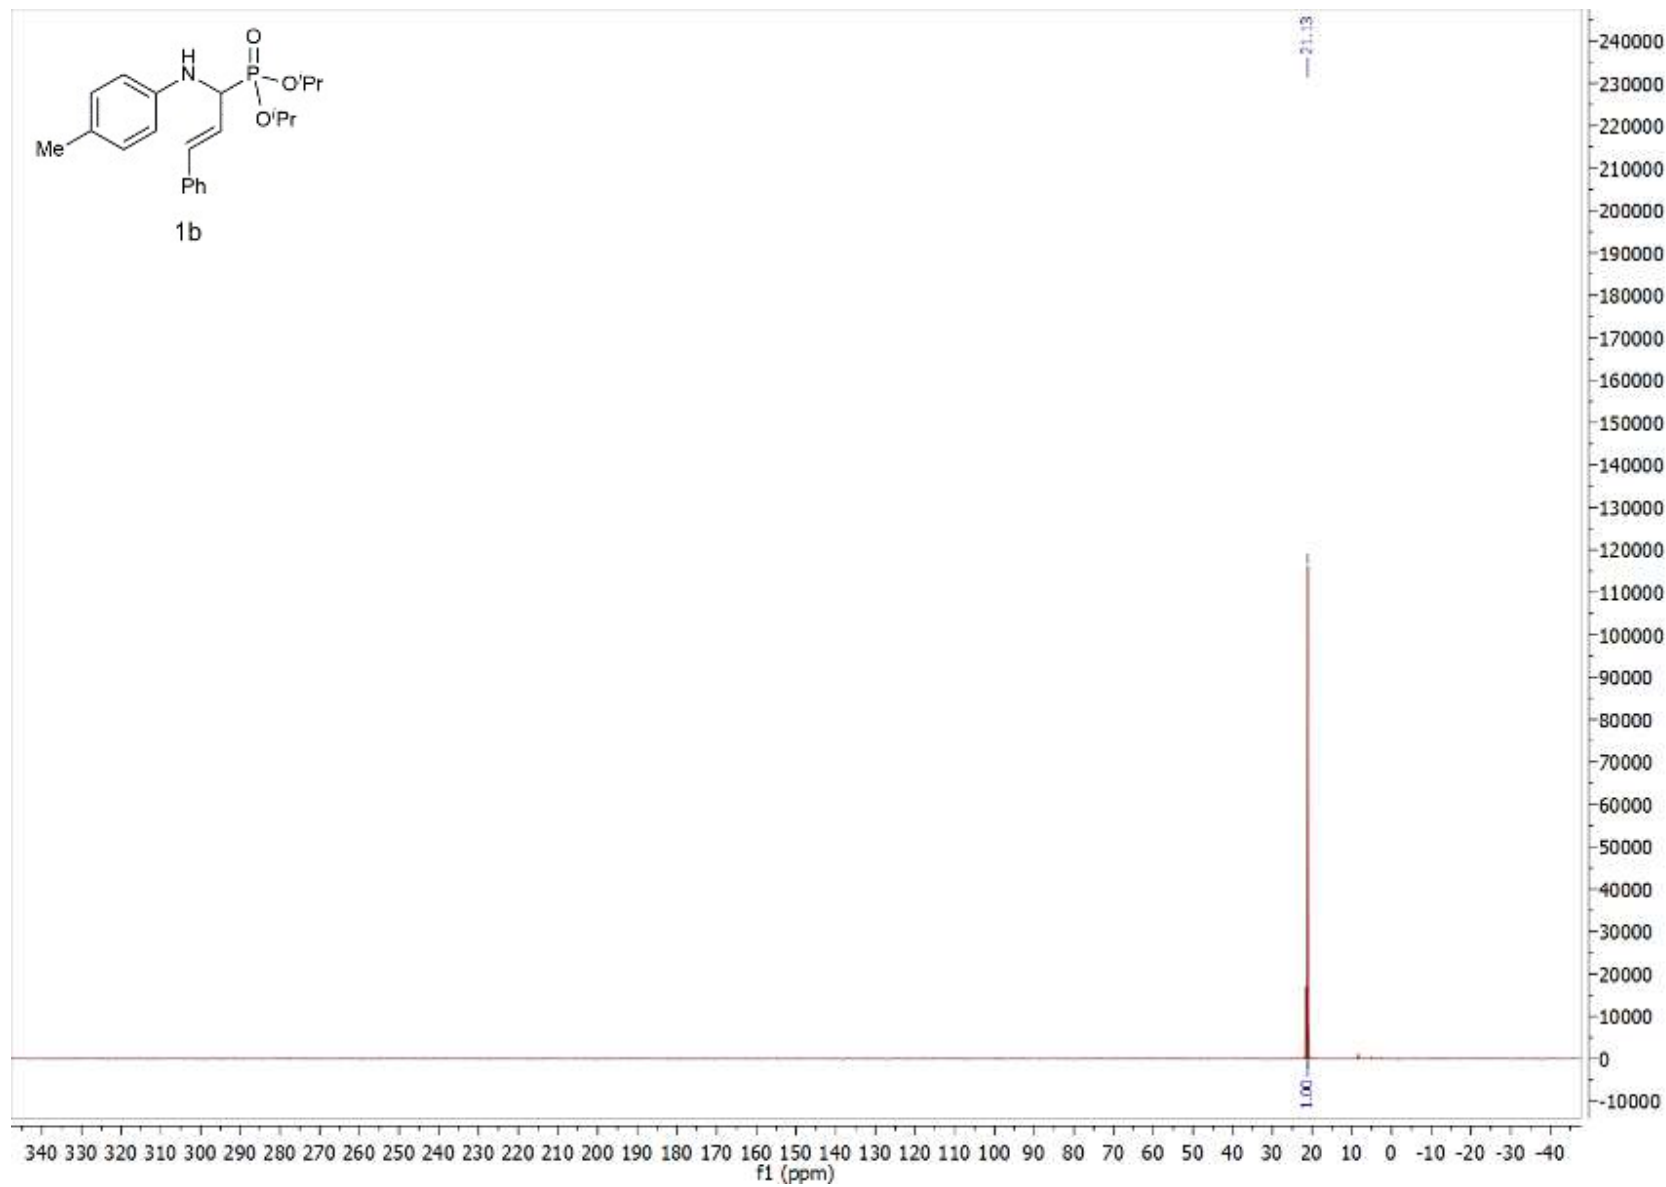

Figure S6:  $^{31}\text{P}$  NMR Spectra of 1b

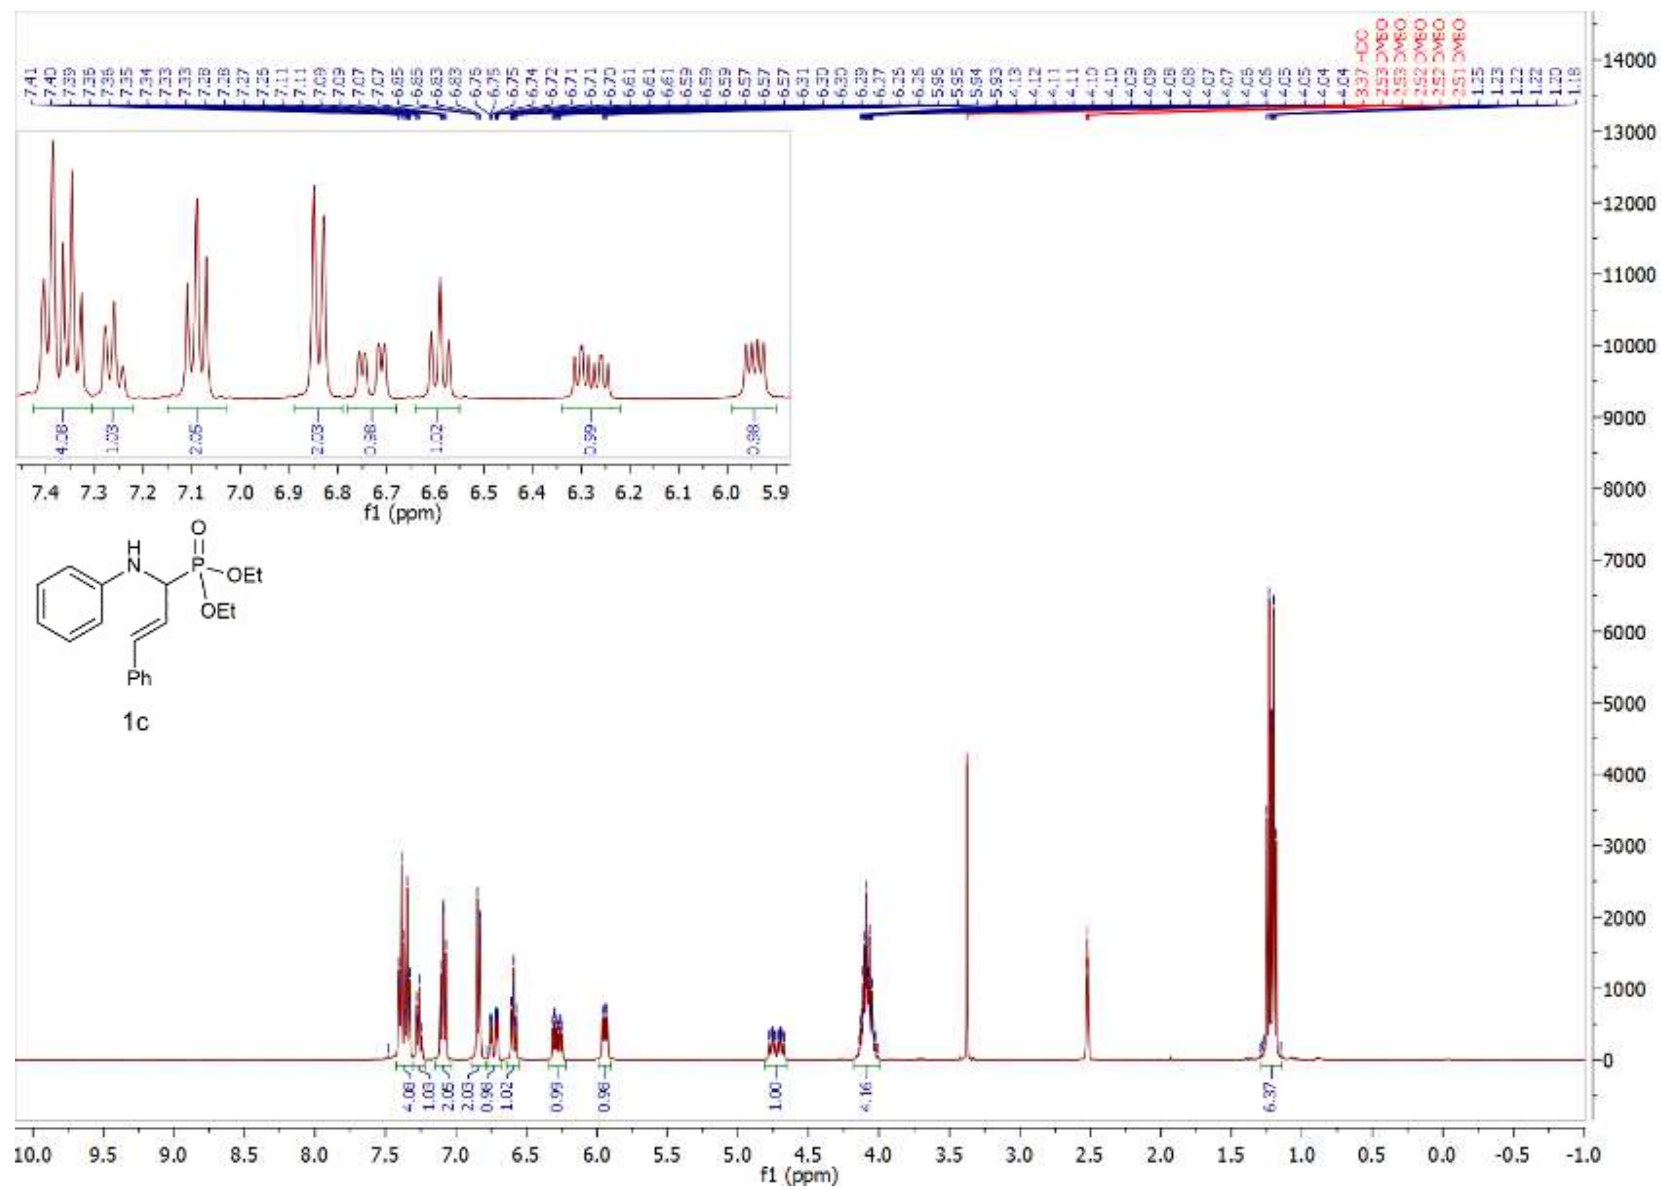

Figure S7:  $^1\text{H}$  NMR Spectra of 1c



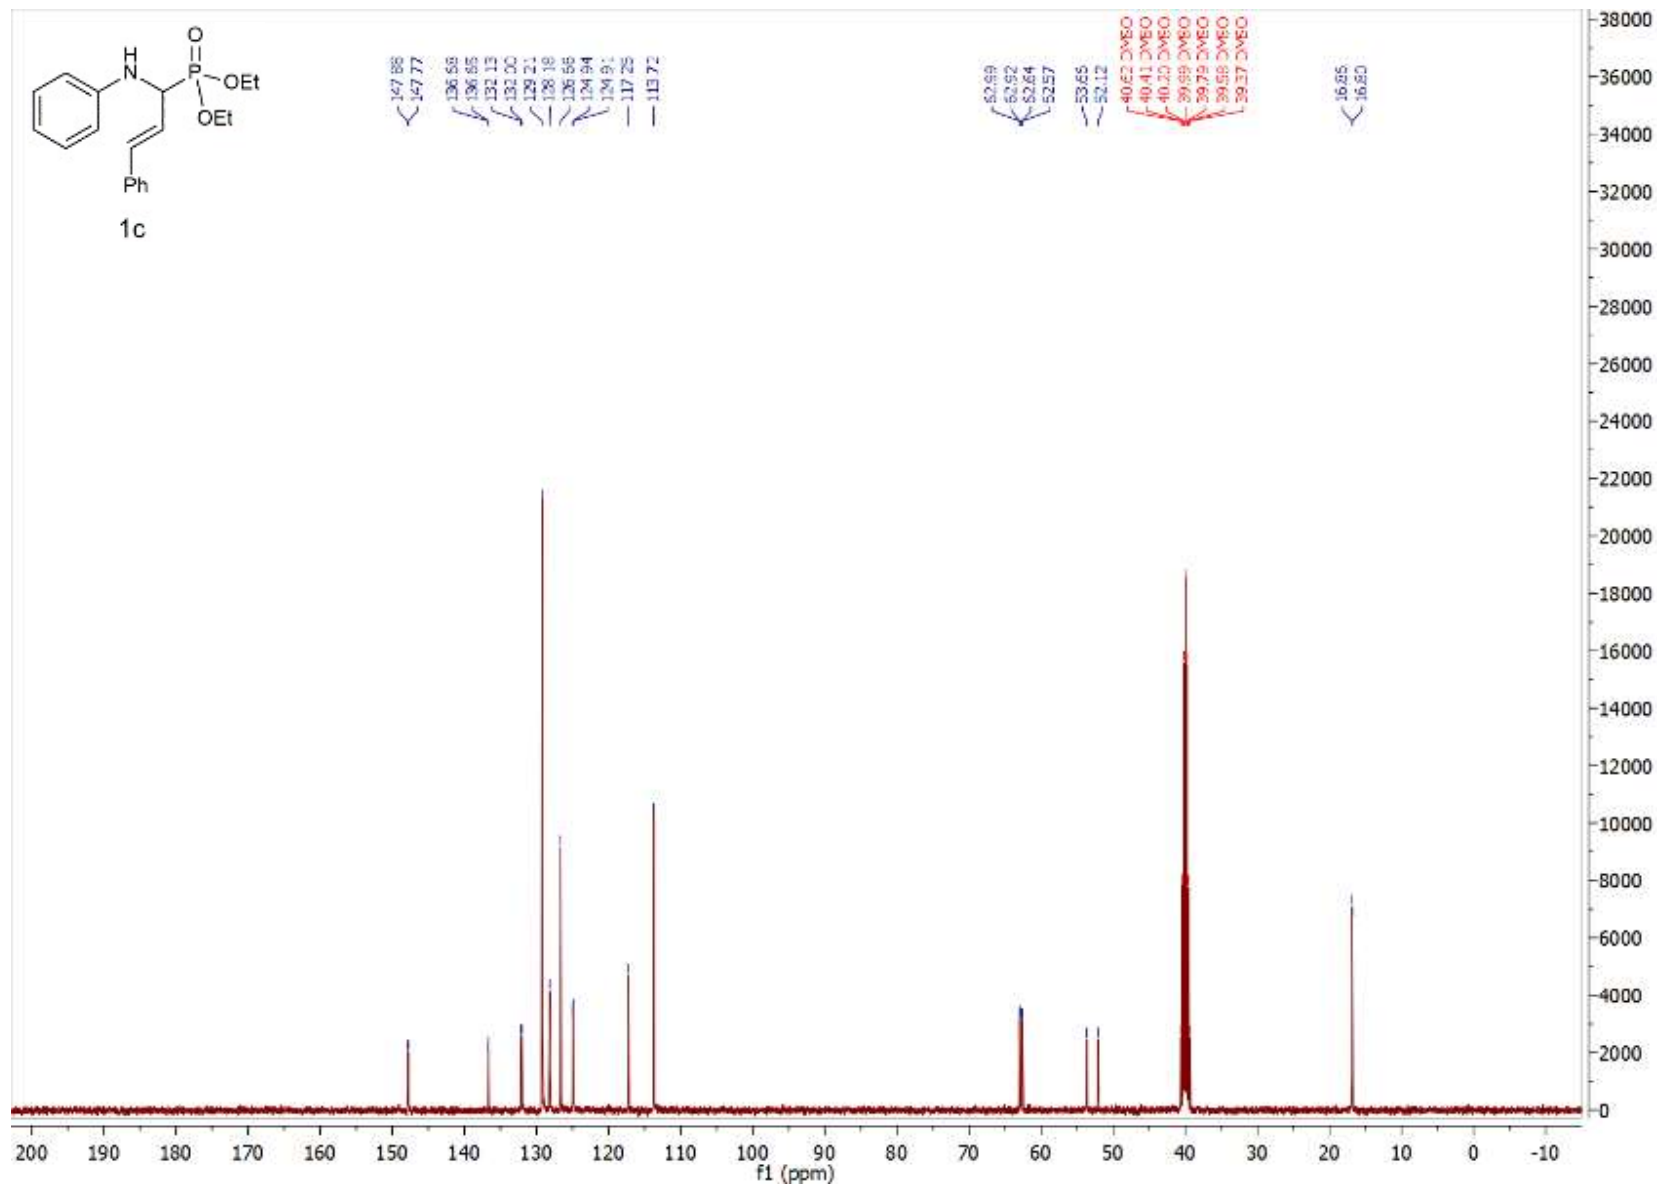

Figure S8:  $^{13}\text{C}$  NMR Spectra of 1c

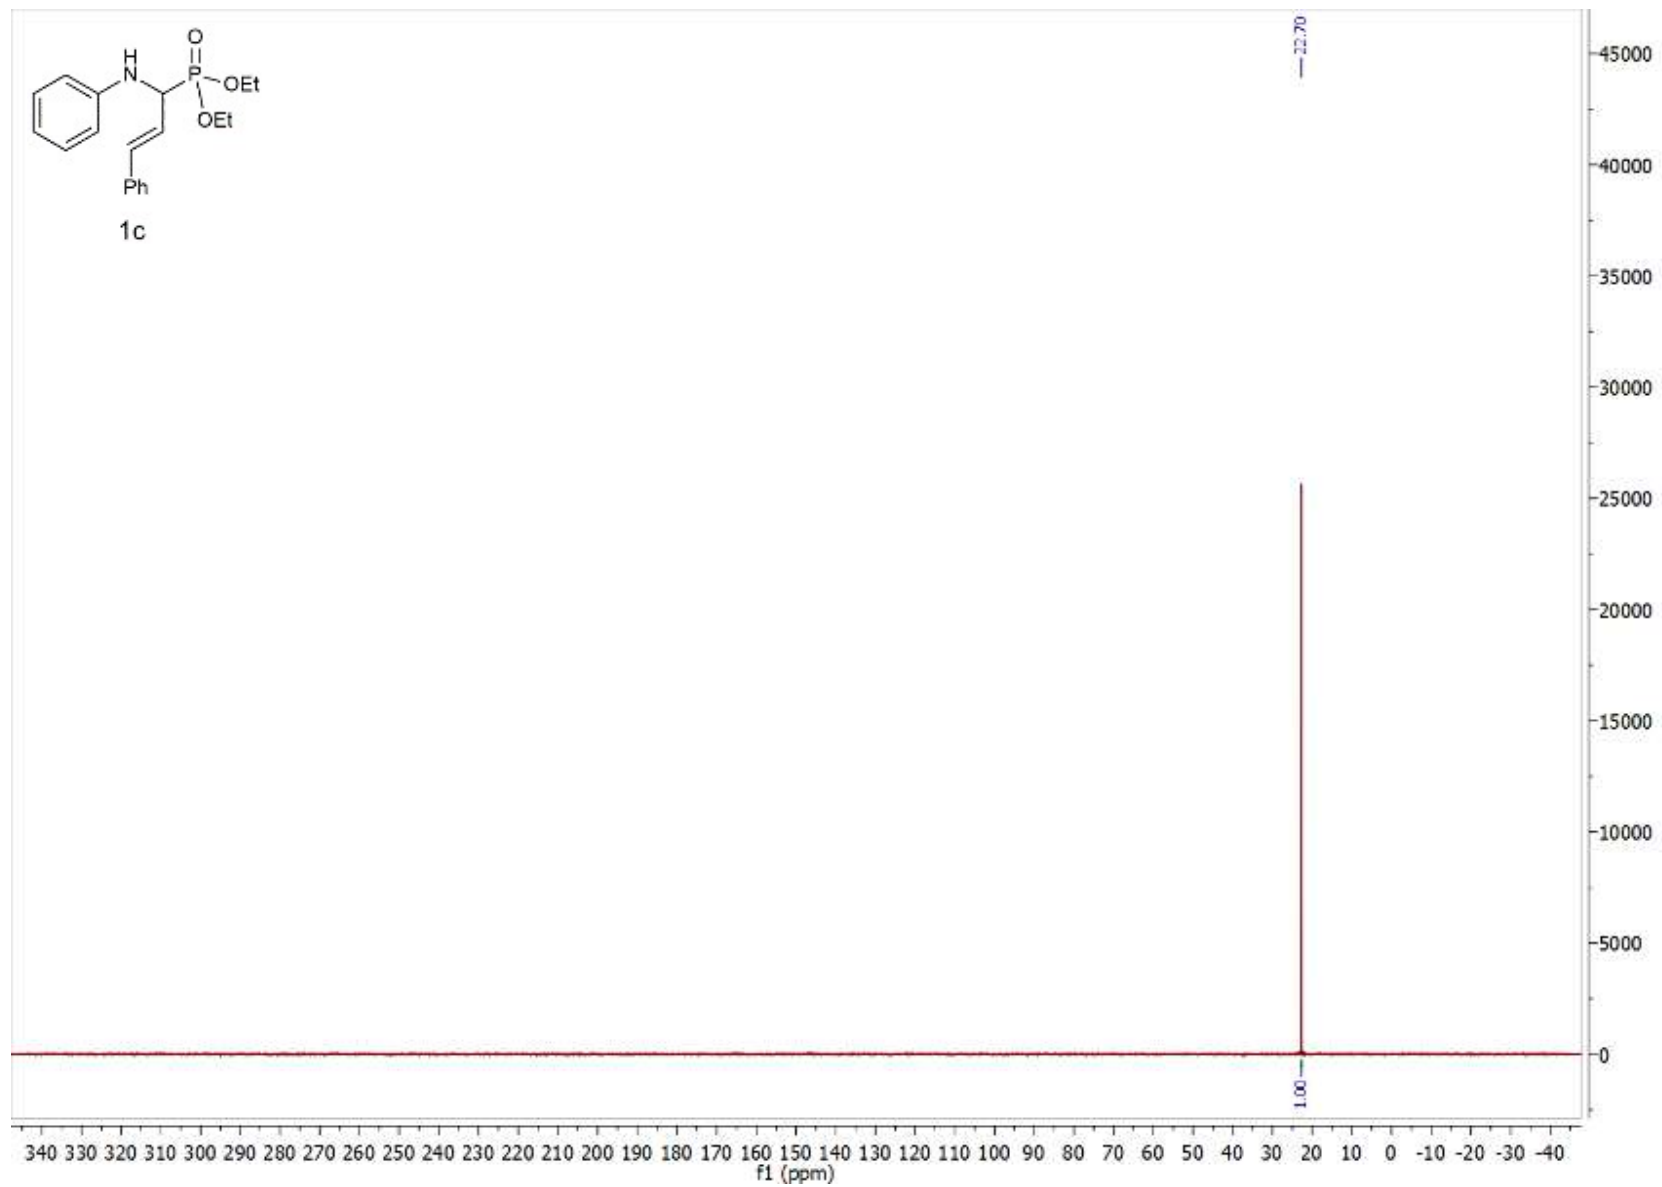

Figure S9:  $^{31}\text{P}$  NMR Spectra of **1c**

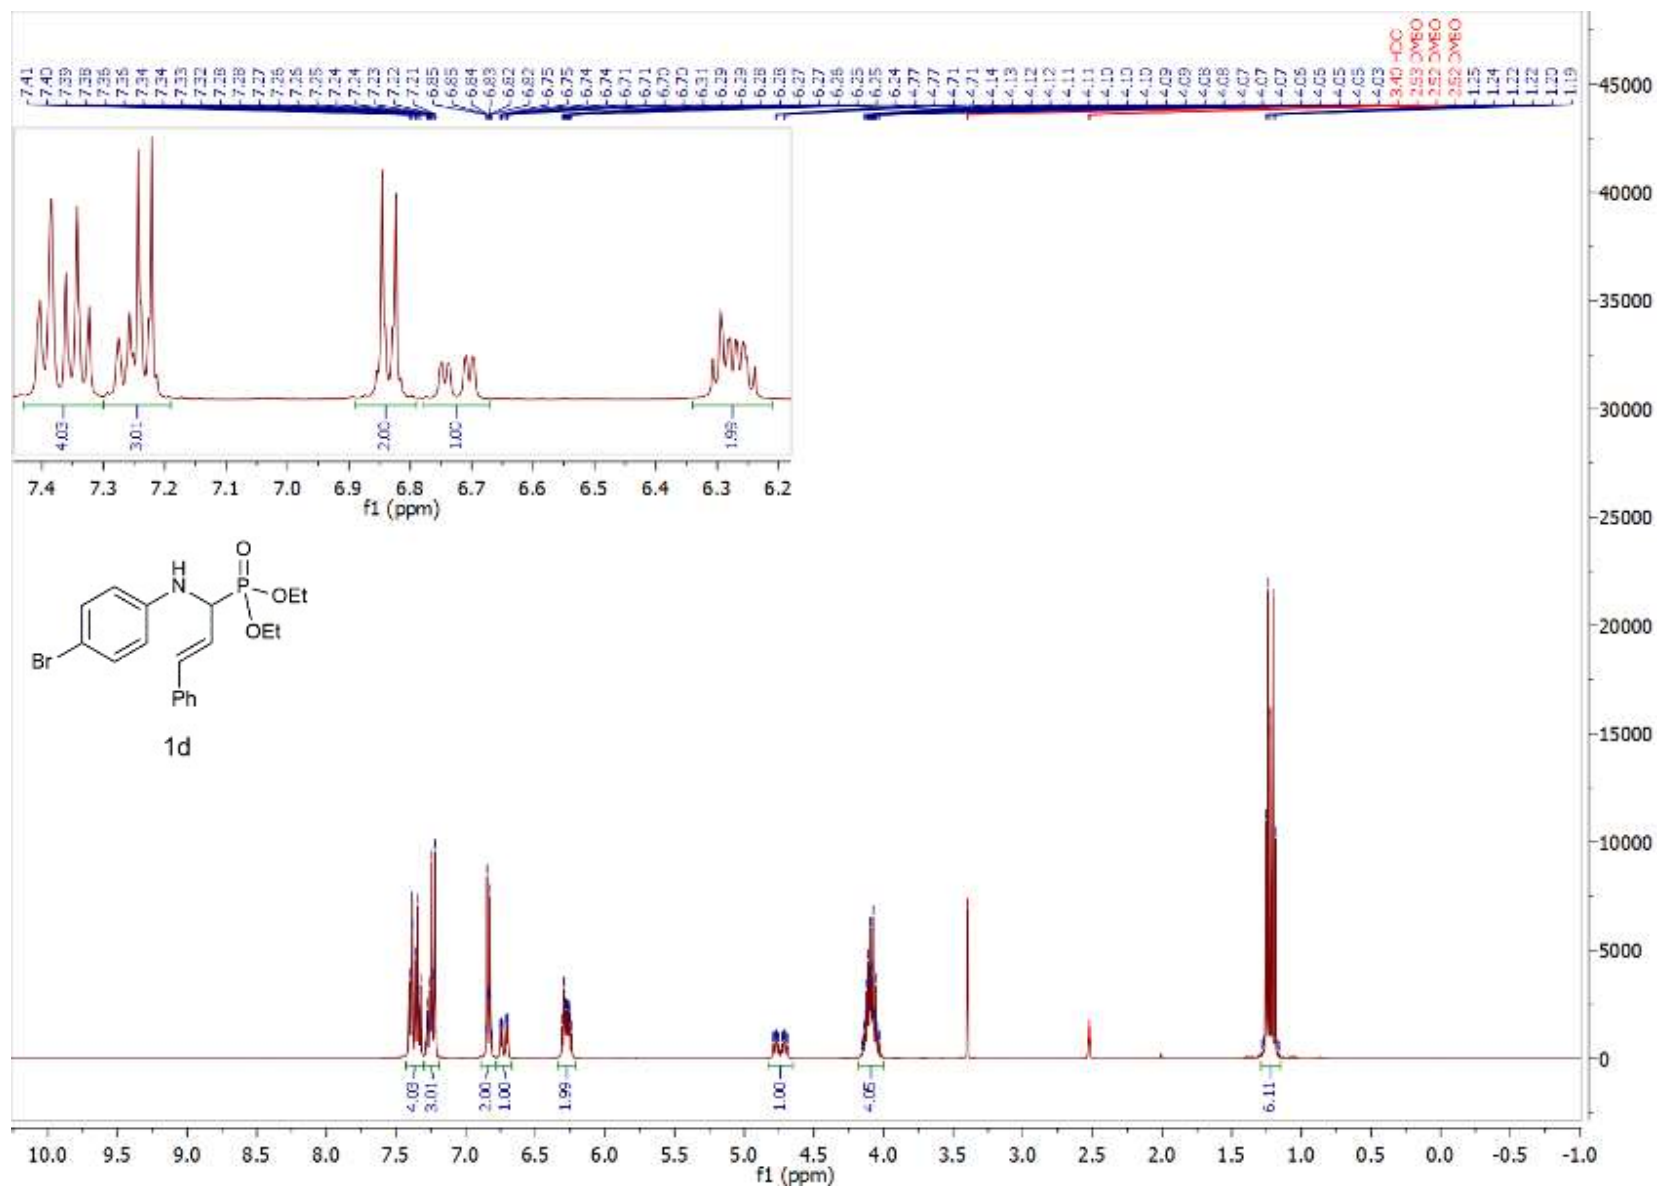

Figure S10: <sup>1</sup>H NMR Spectra of 1d

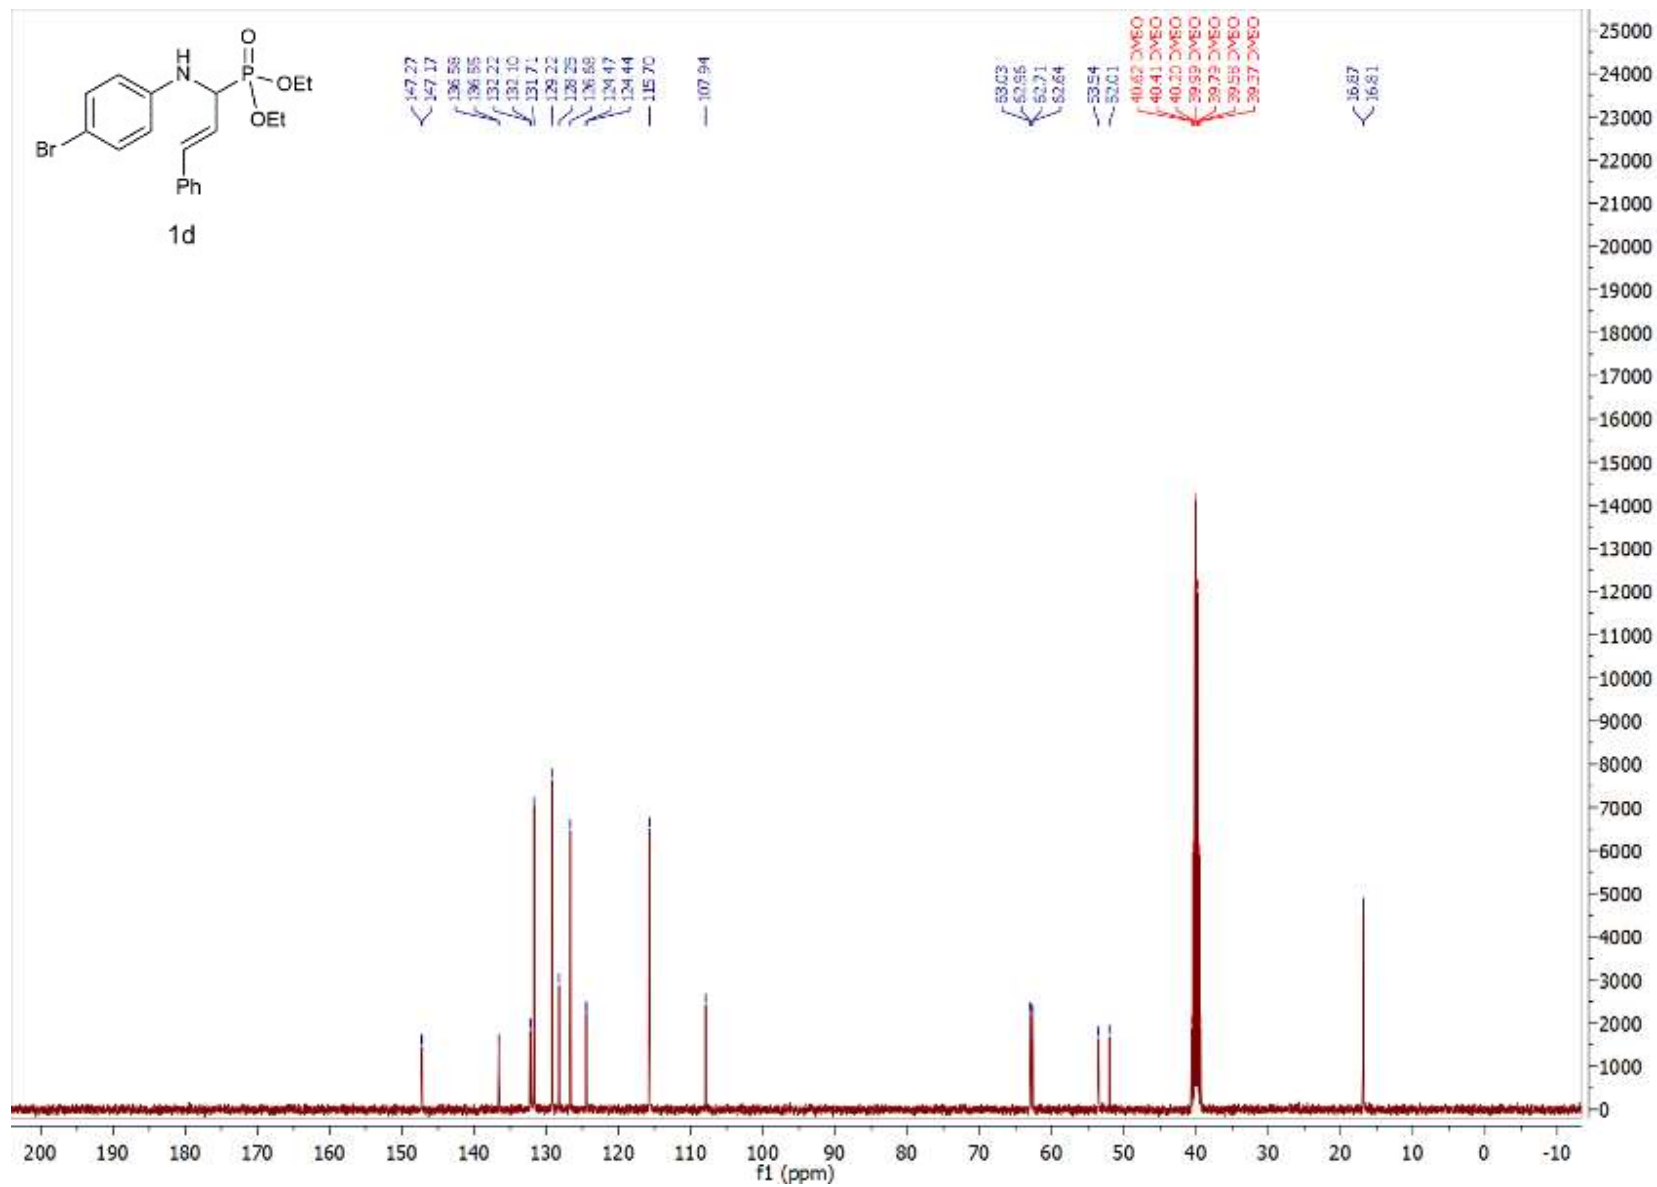

Figure S11: <sup>13</sup>C NMR Spectra of 1d

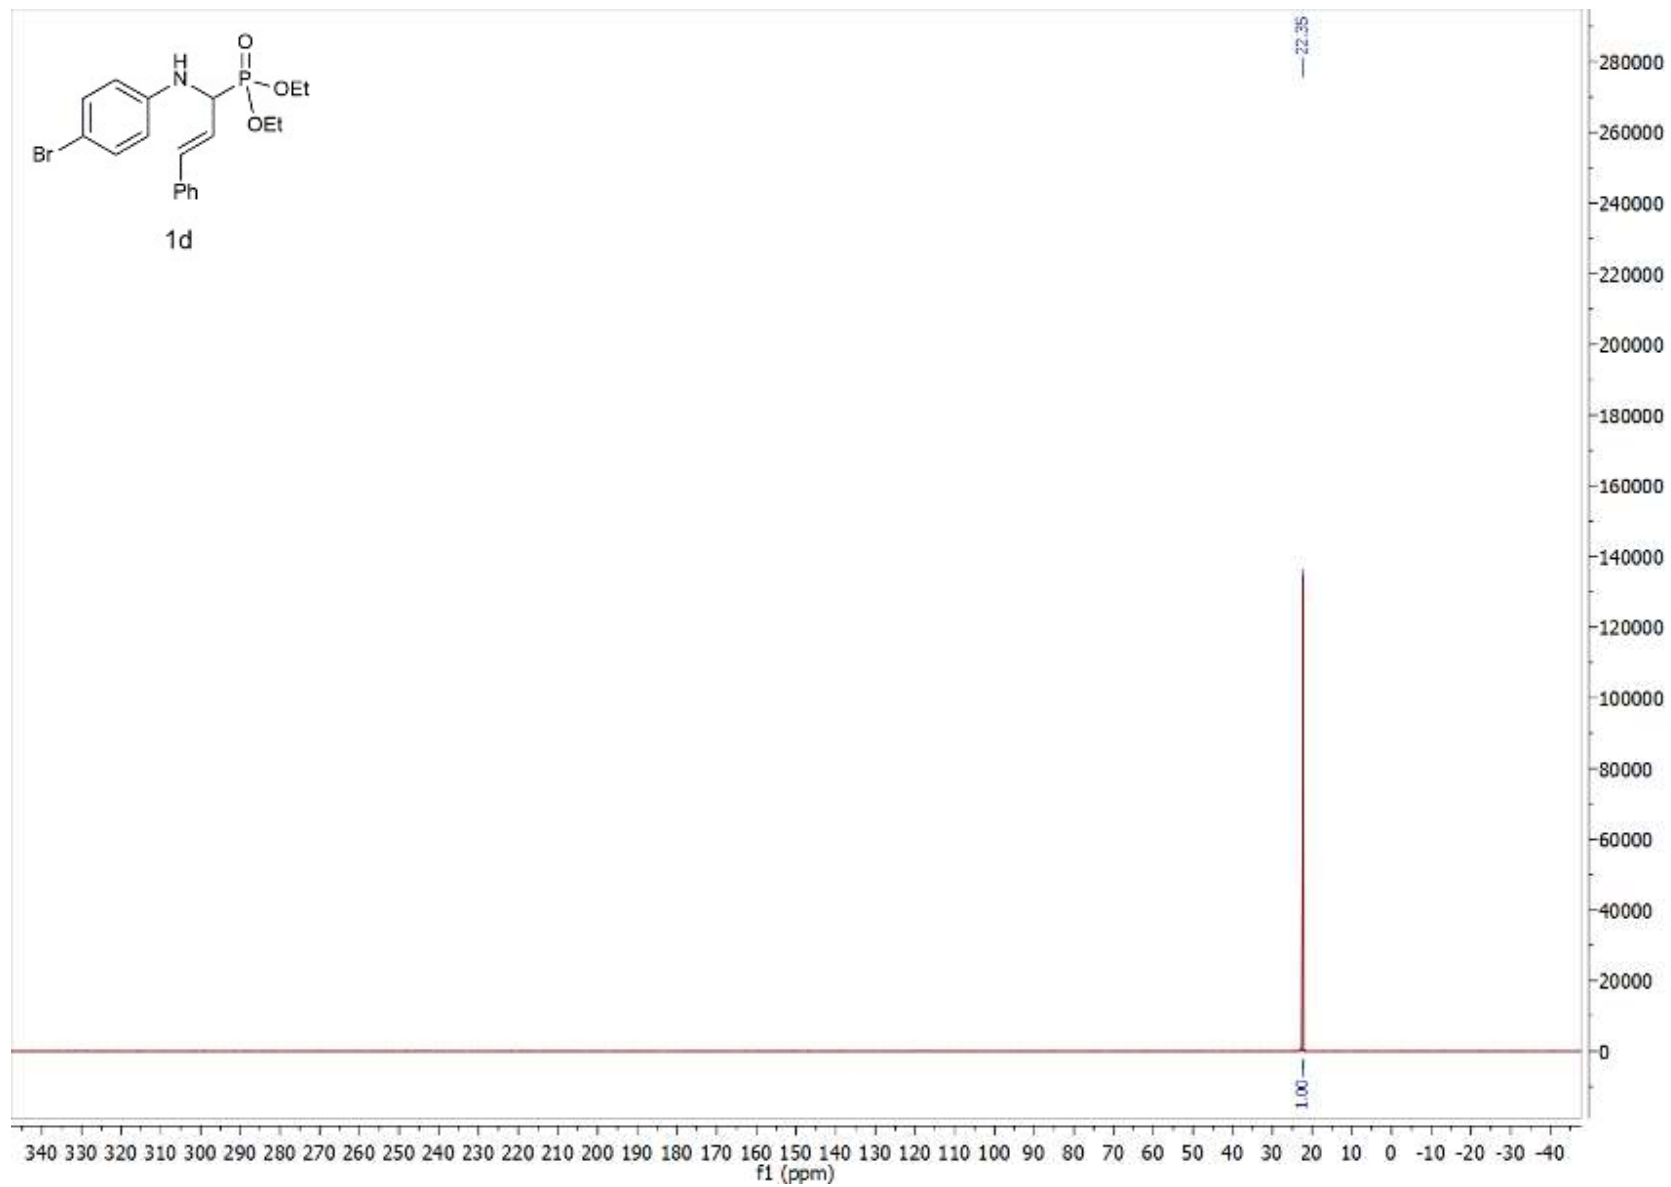

Figure S12:  $^{31}\text{P}$  NMR Spectra of 1d

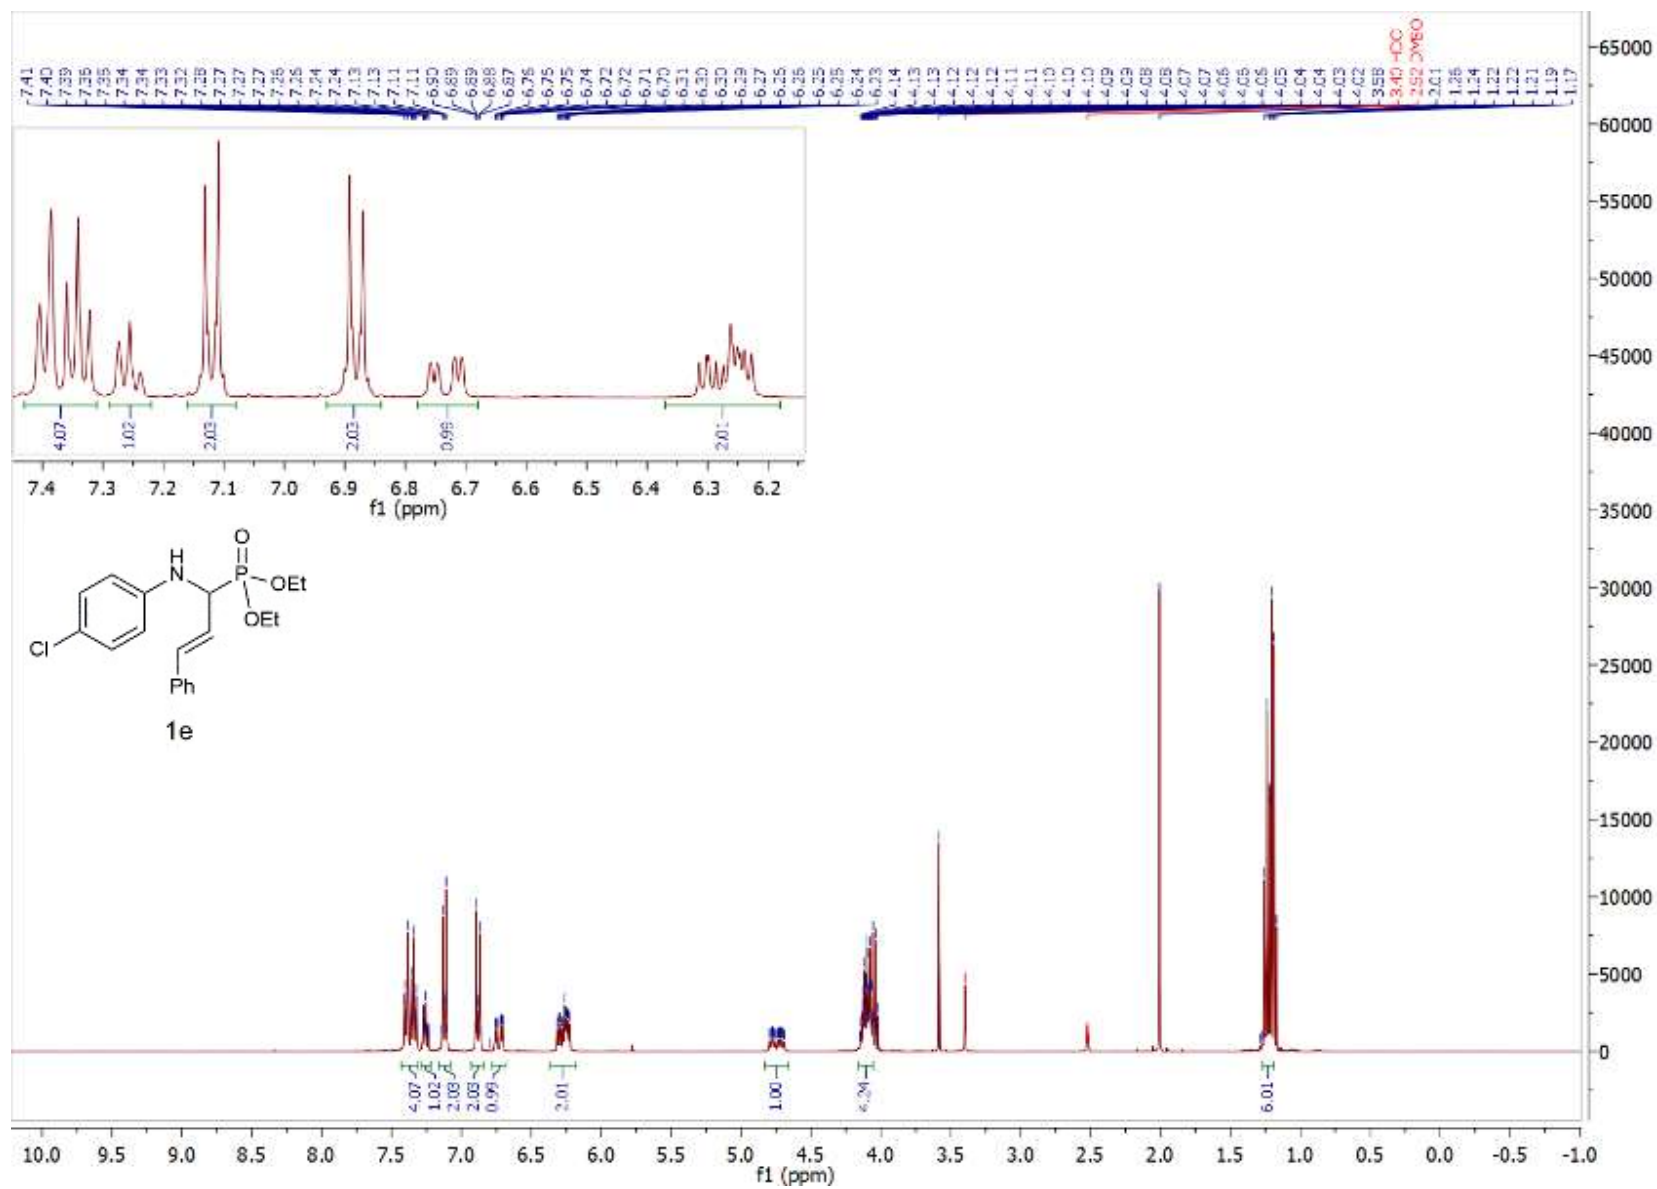

Figure S13: <sup>1</sup>H NMR Spectra of 1e

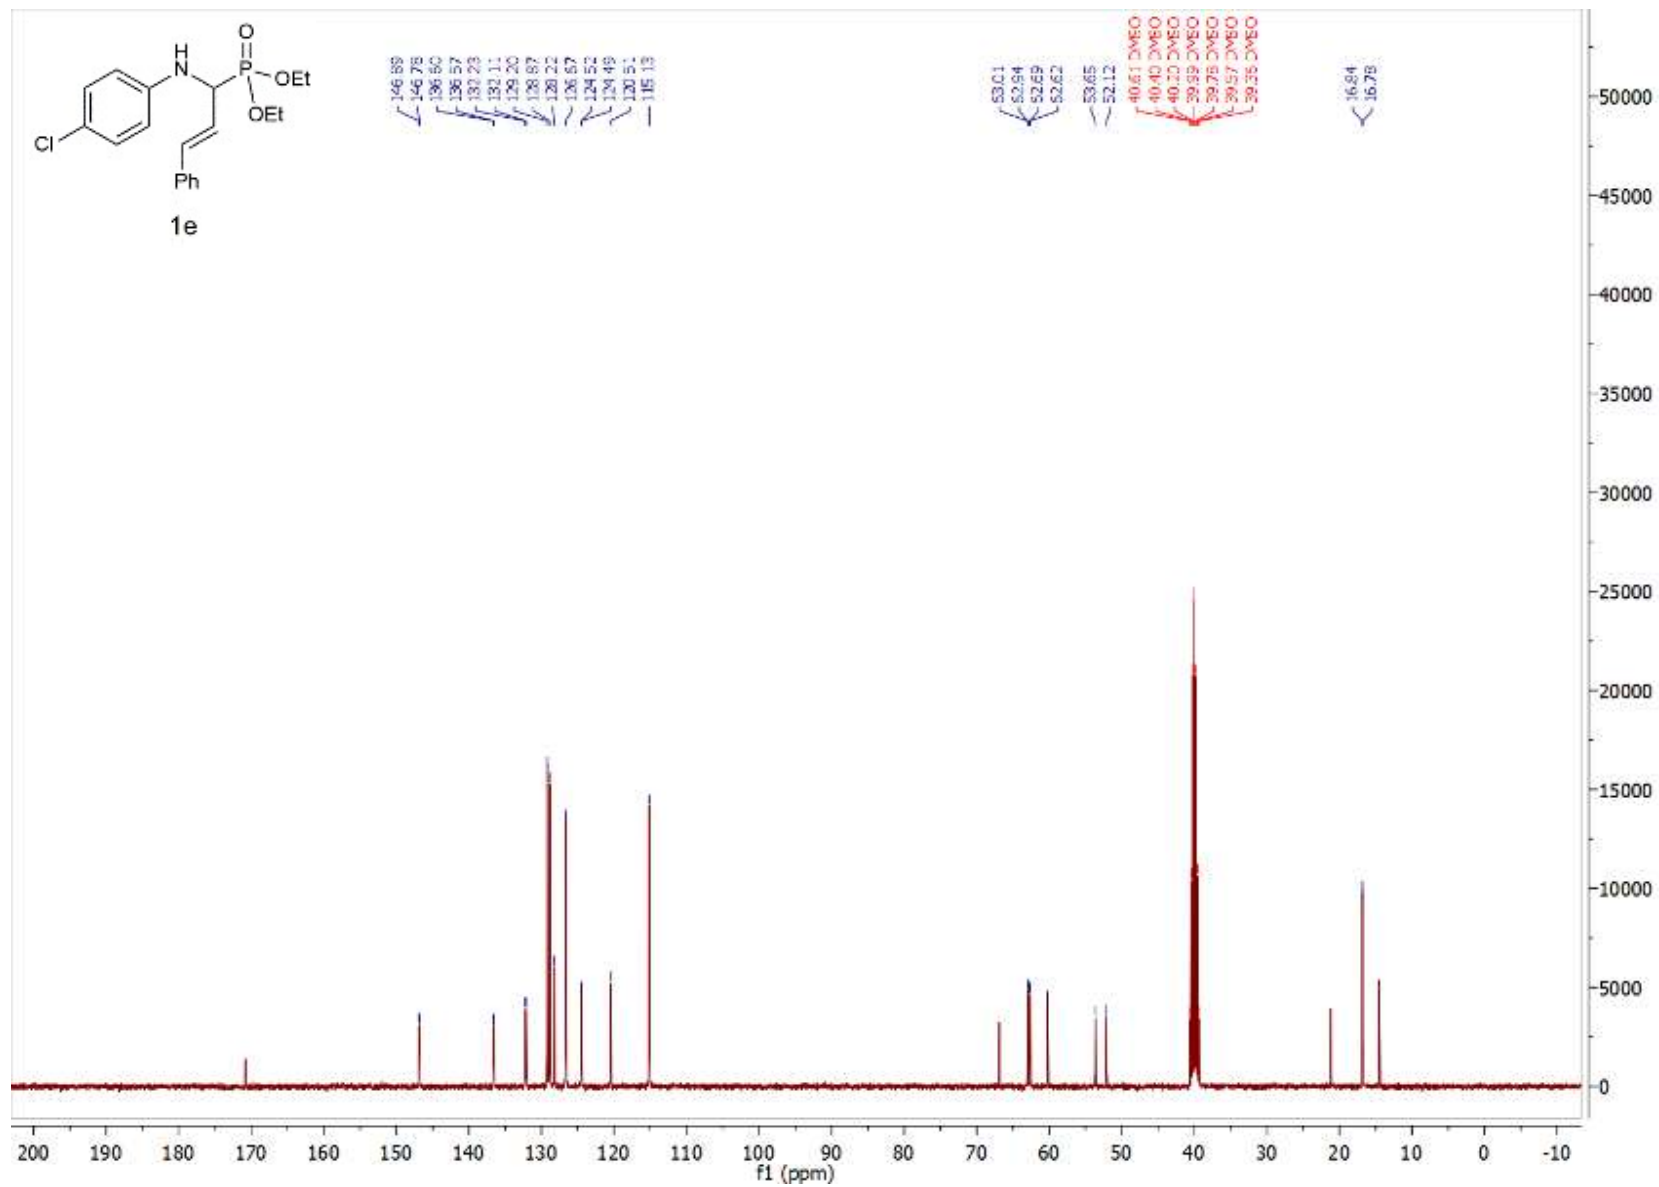

Figure S14:  $^{13}\text{C}$  NMR Spectra of **1e**

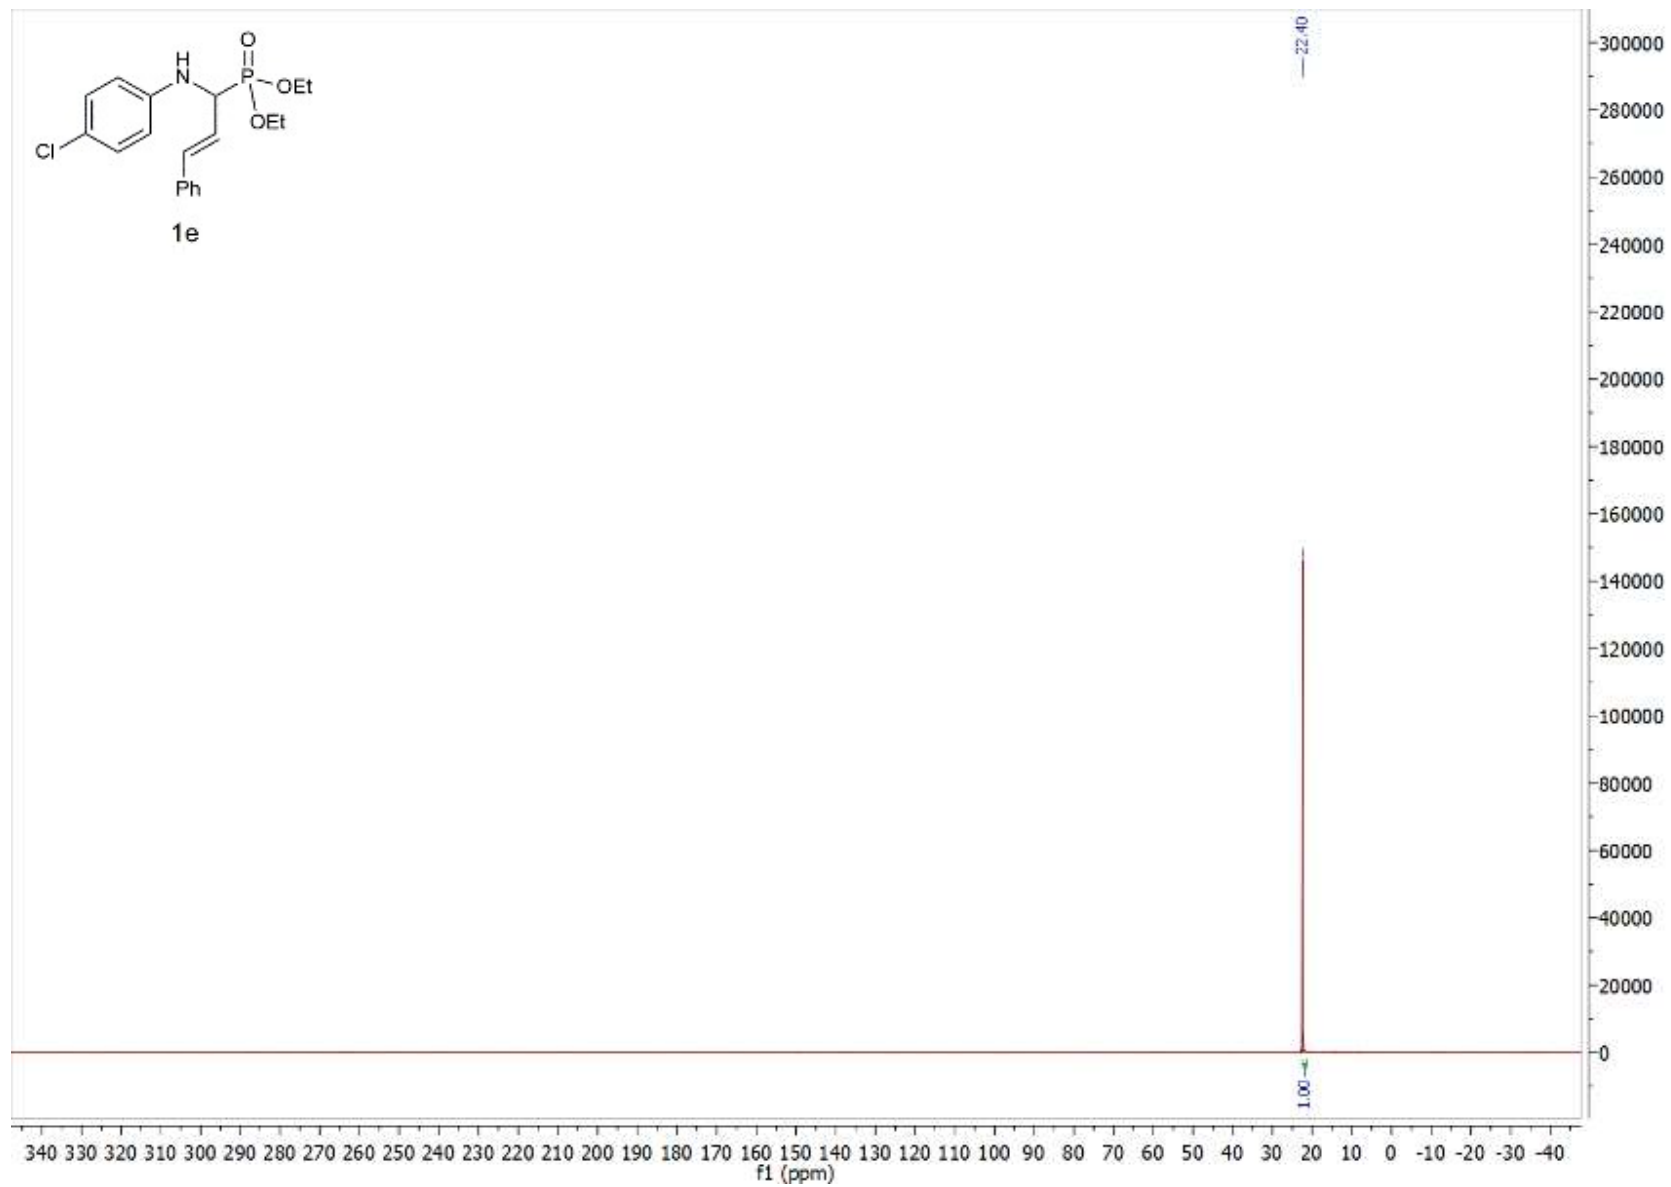

Figure S15:  $^{31}\text{P}$  NMR Spectra of **1e**



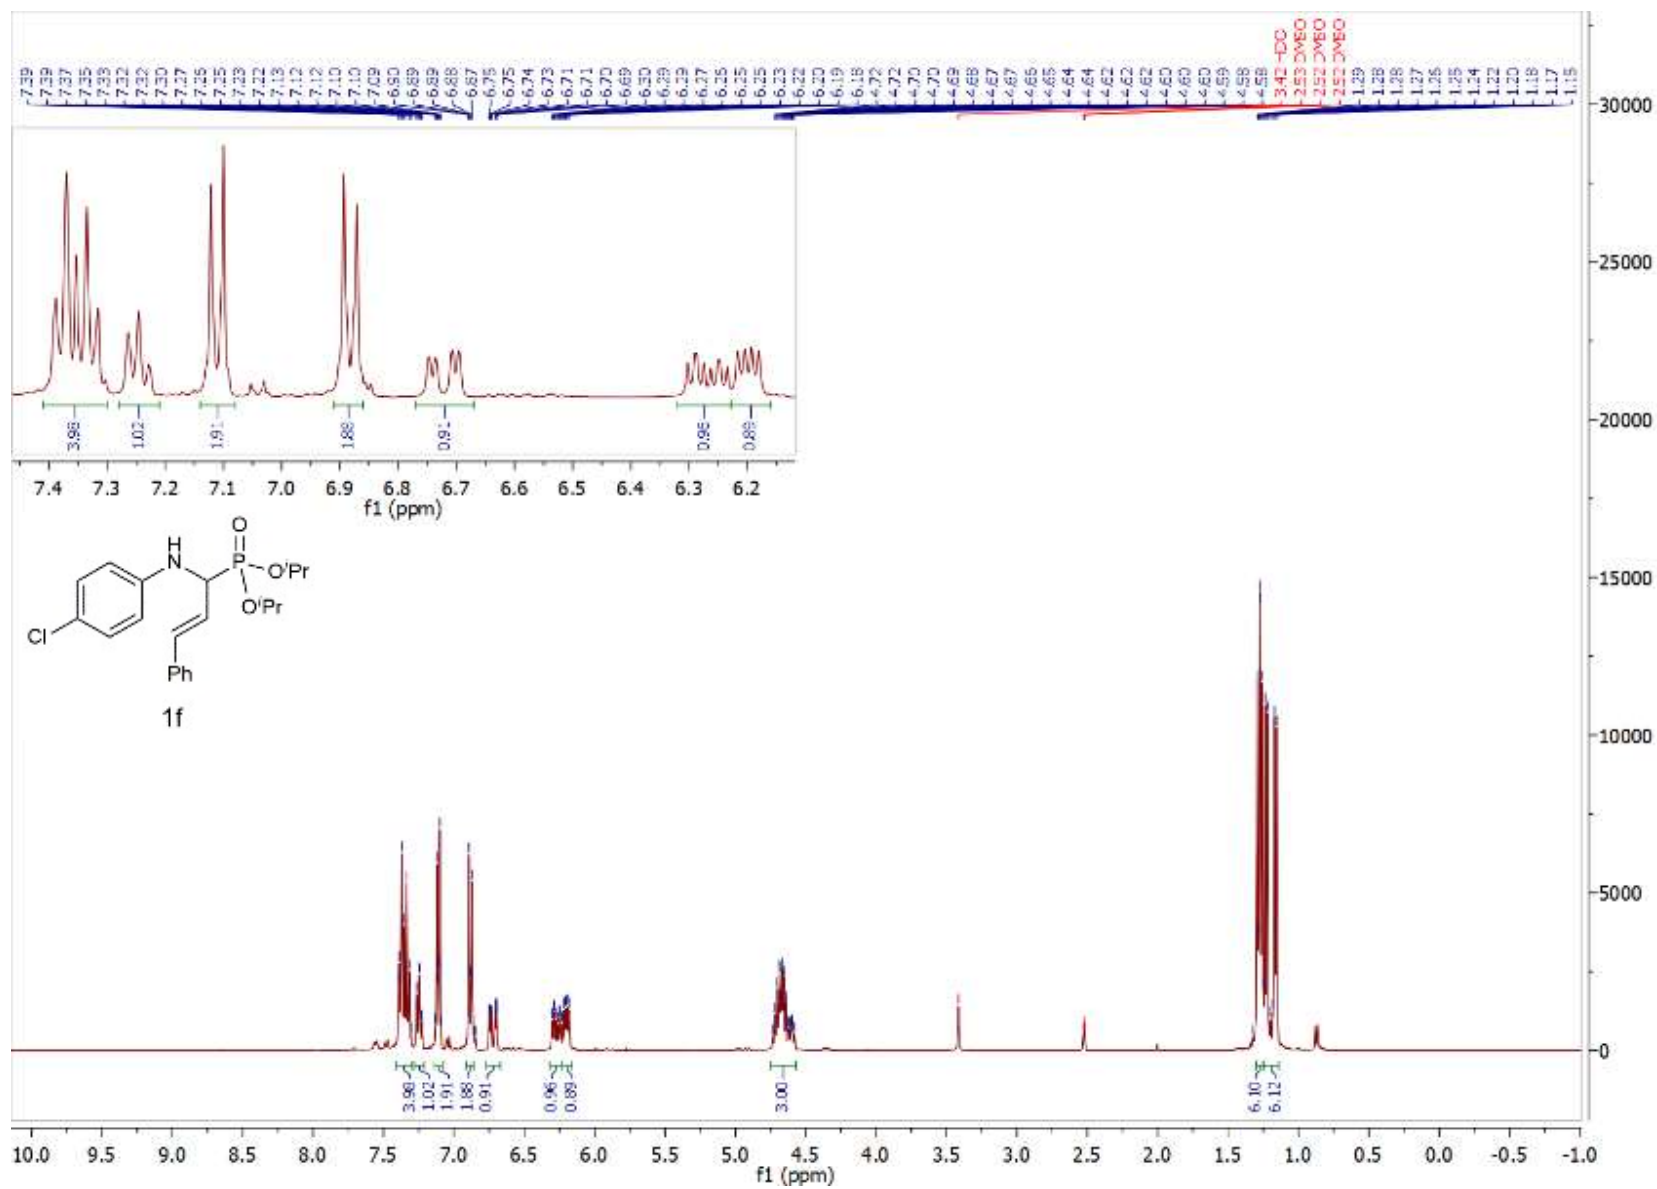

Figure S16: <sup>1</sup>H NMR Spectra of **1f**

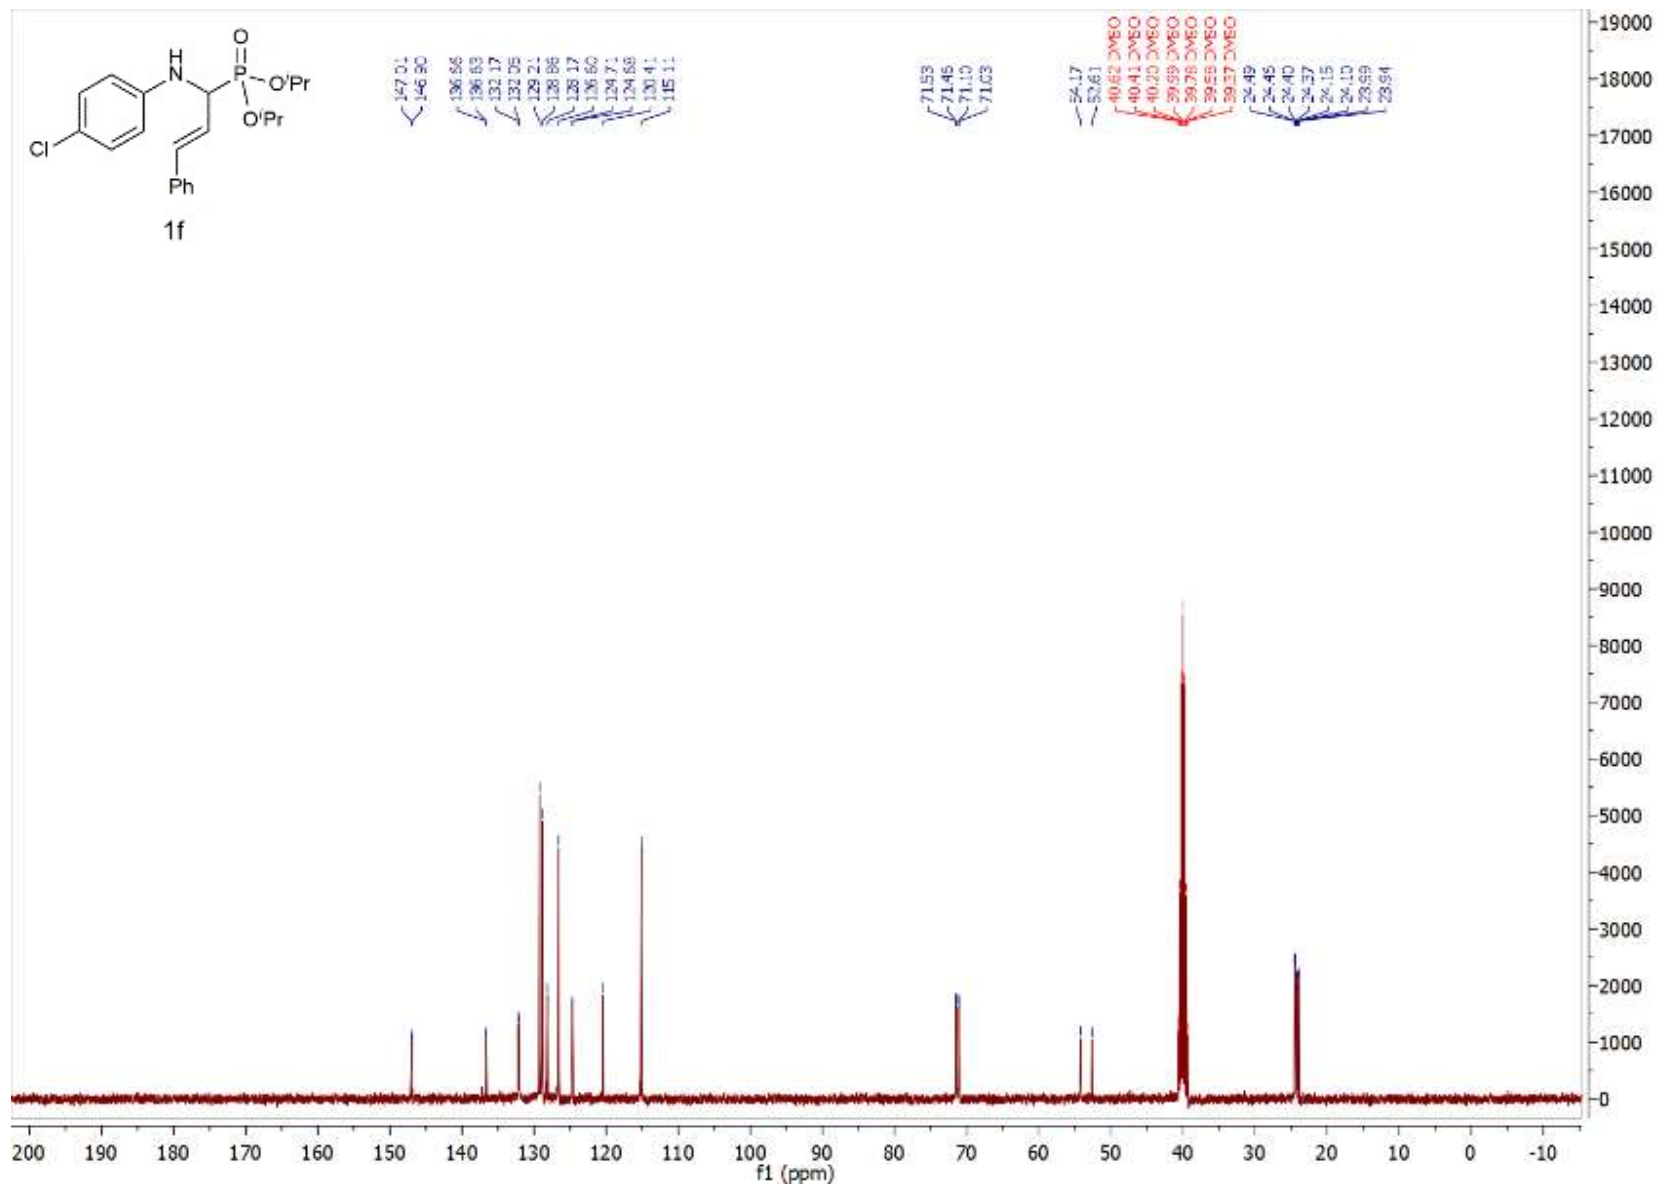

Figure S17: <sup>13</sup>C NMR Spectra of 1f

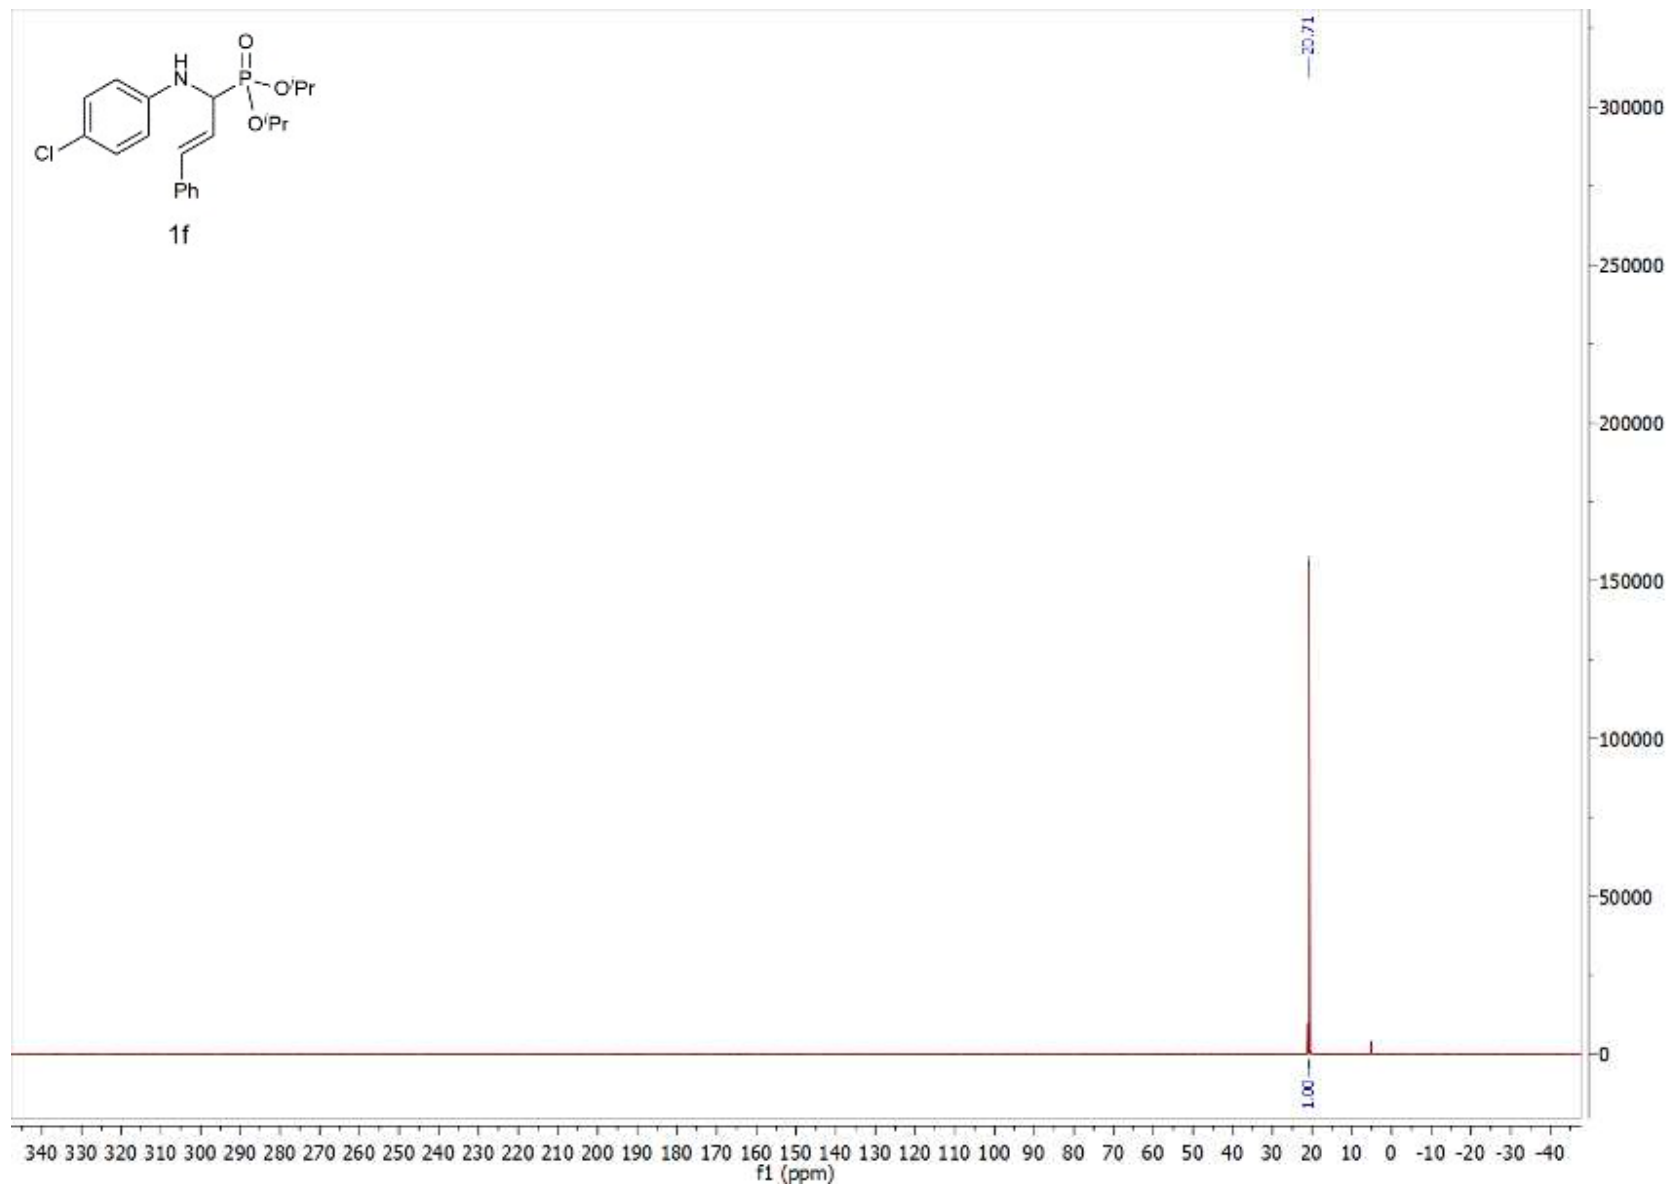

Figure S18:  $^{31}\text{P}$  NMR Spectra of **1f**

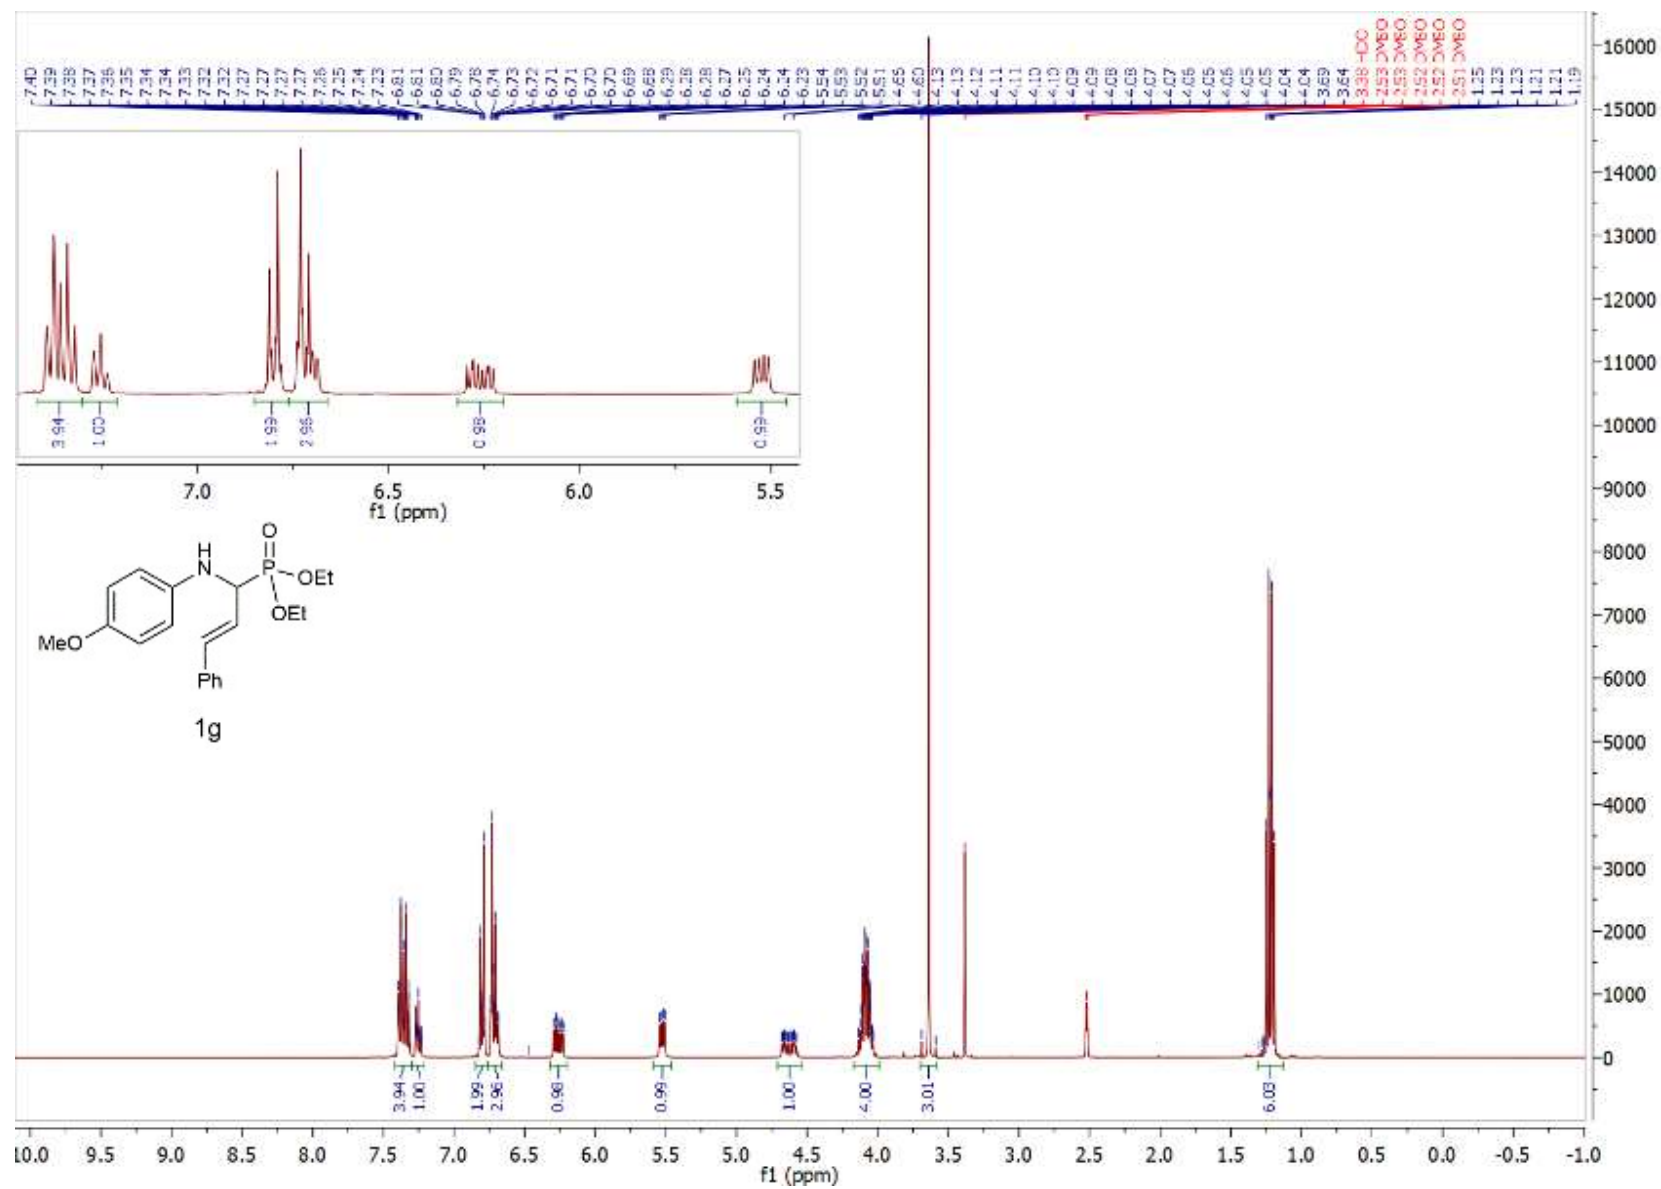

Figure S19: <sup>1</sup>H NMR Spectra of 1g

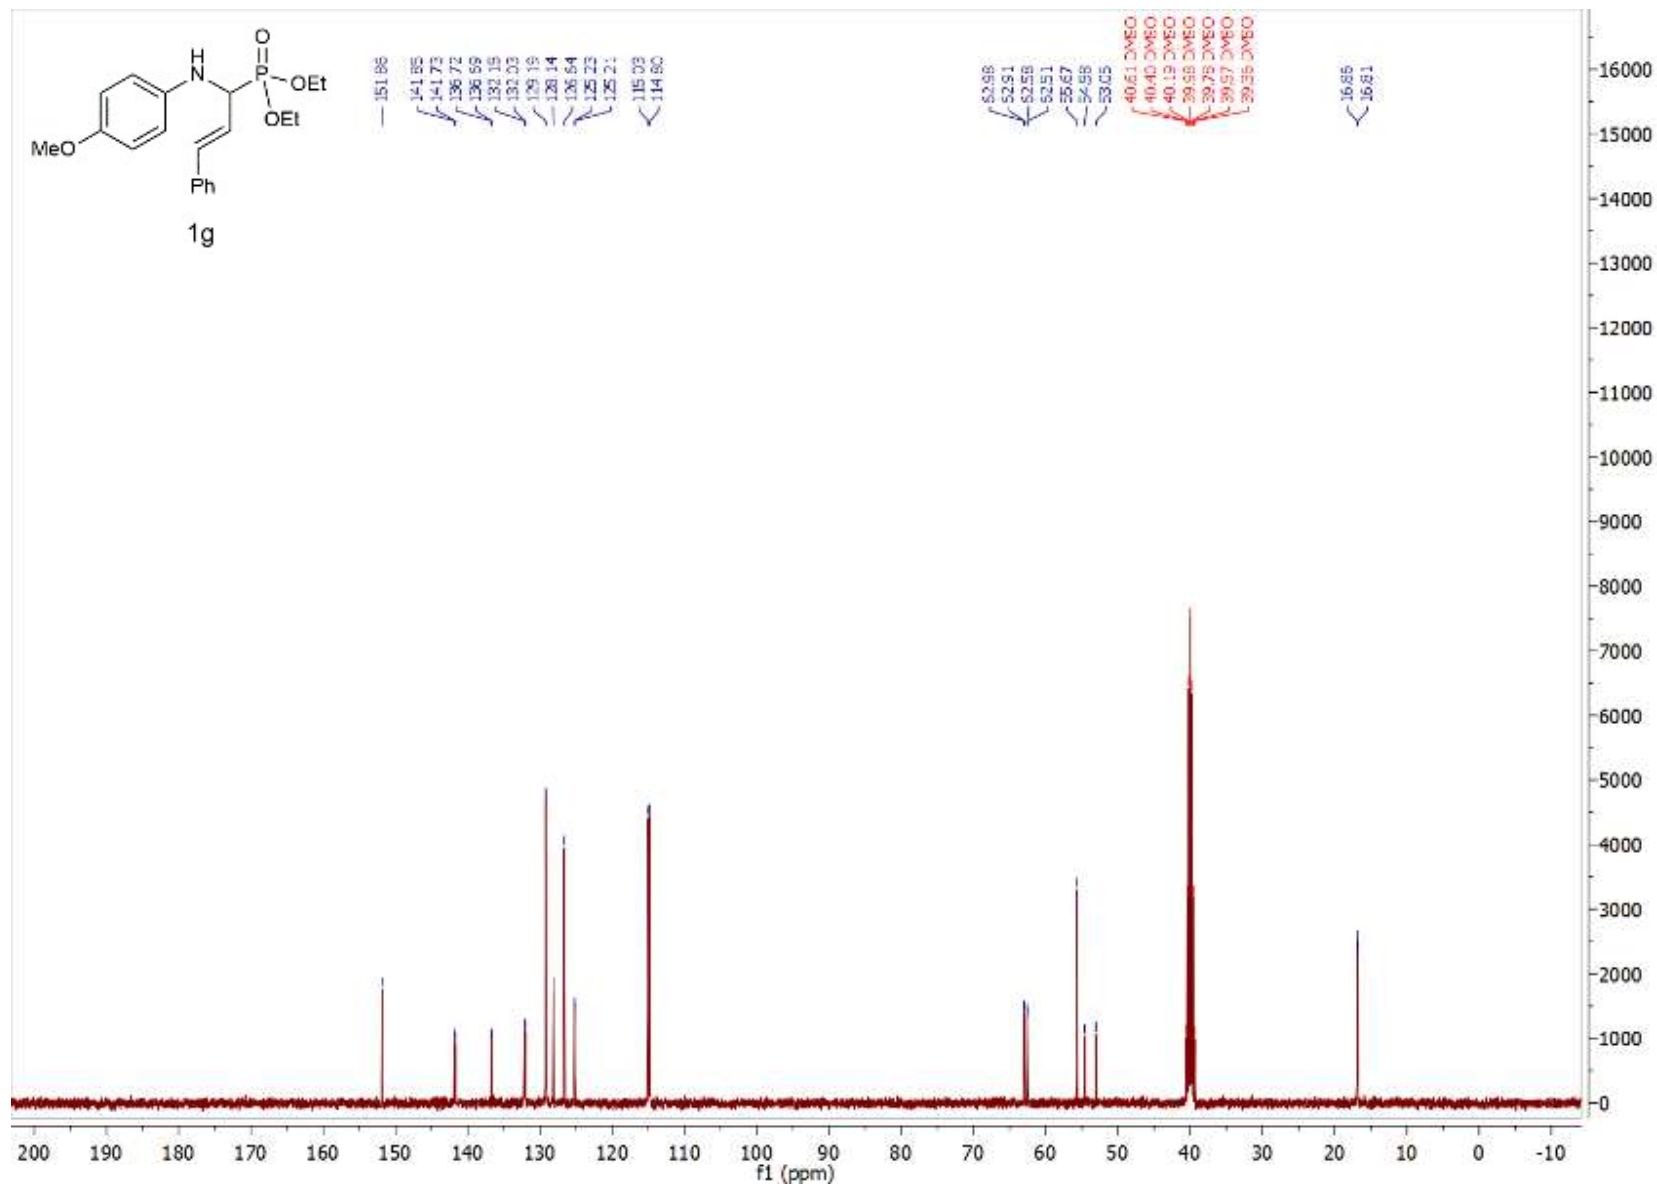

Figure S20:  $^{13}\text{C}$  NMR Spectra of 1g

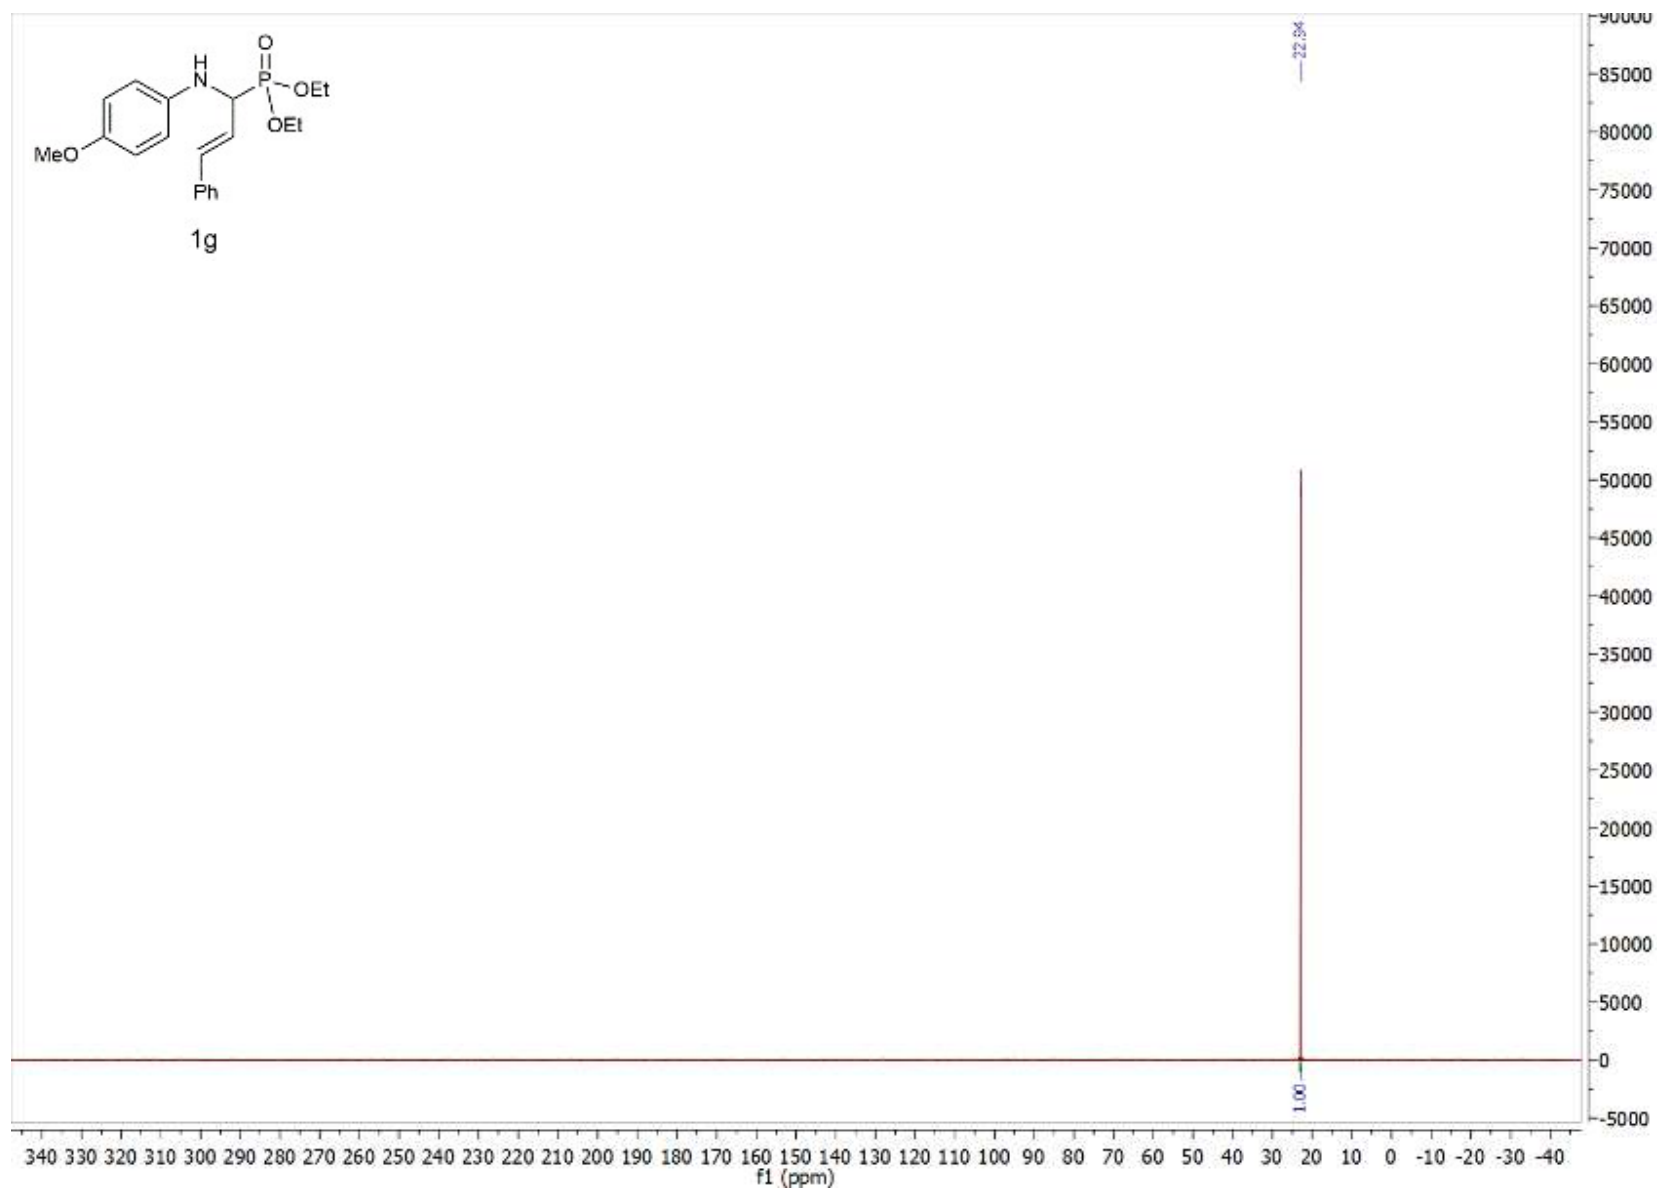

Figure S21:  $^{31}\text{P}$  NMR Spectra of 1g

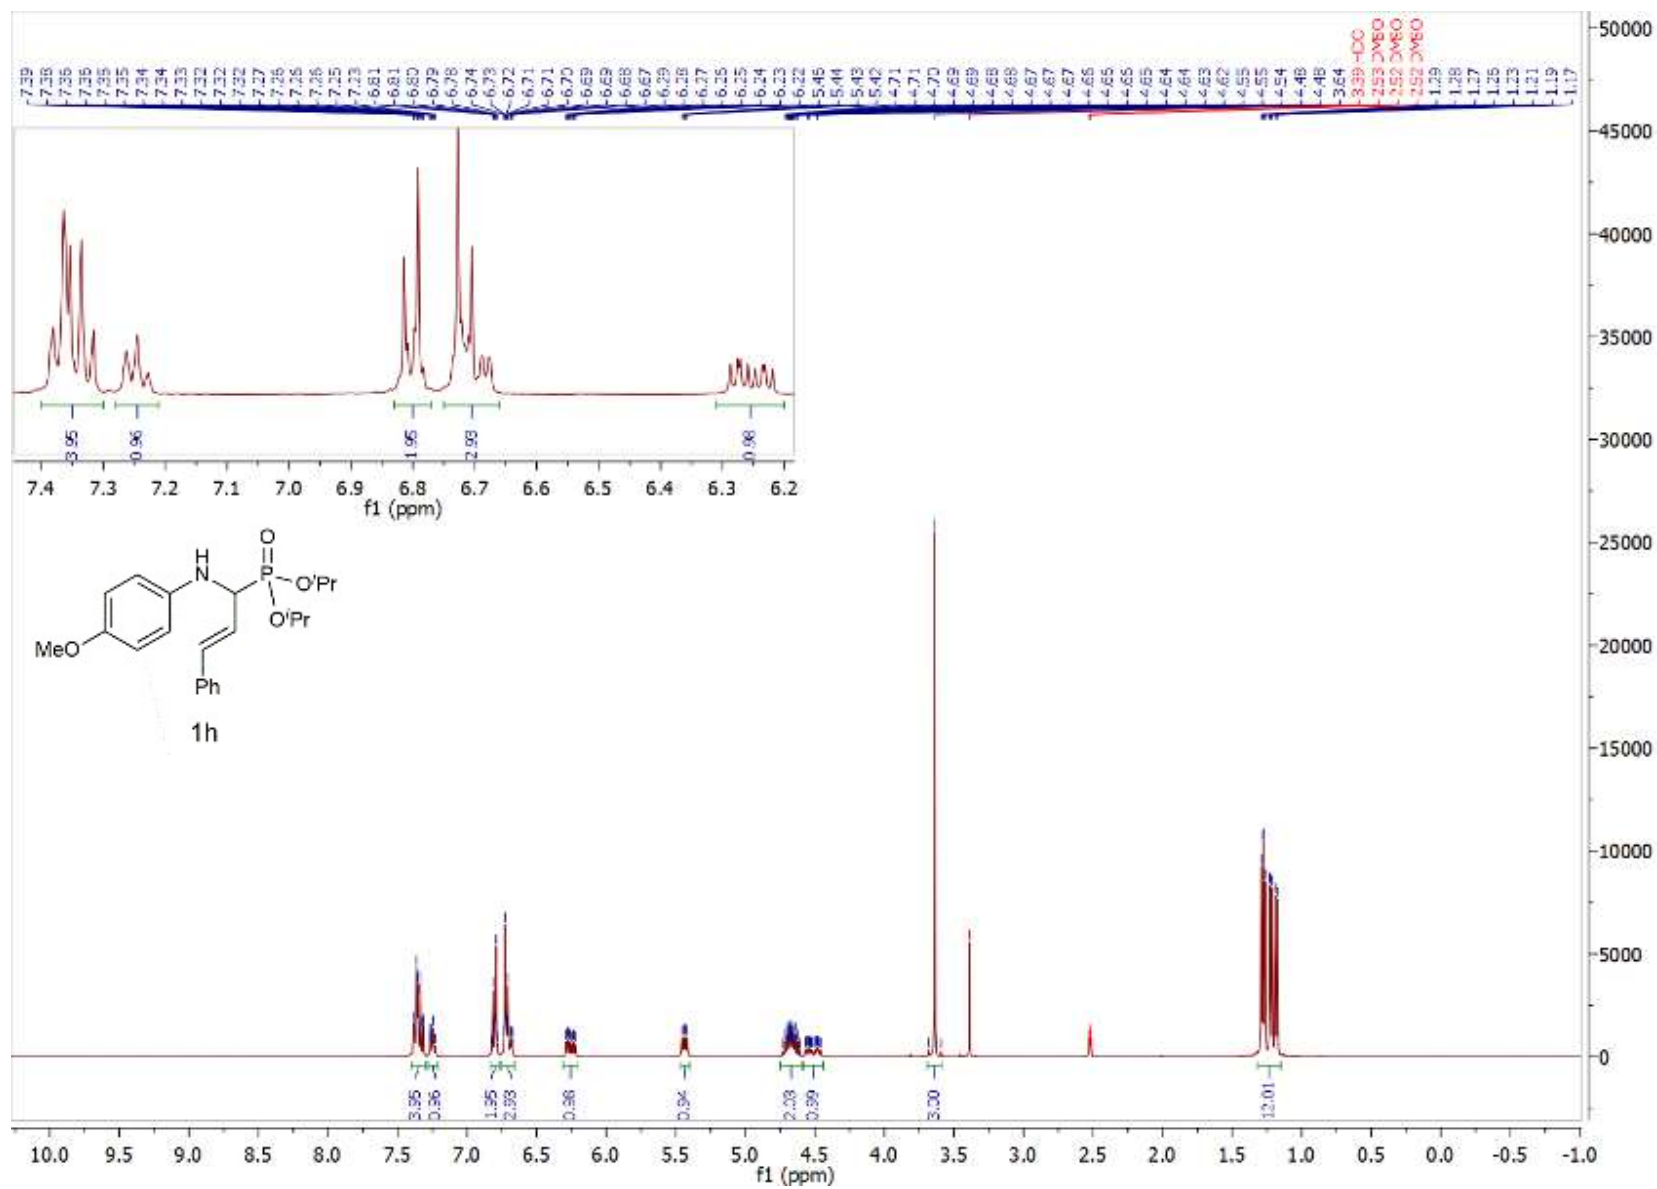

Figure S22:  $^1\text{H}$  NMR Spectra of **1h**

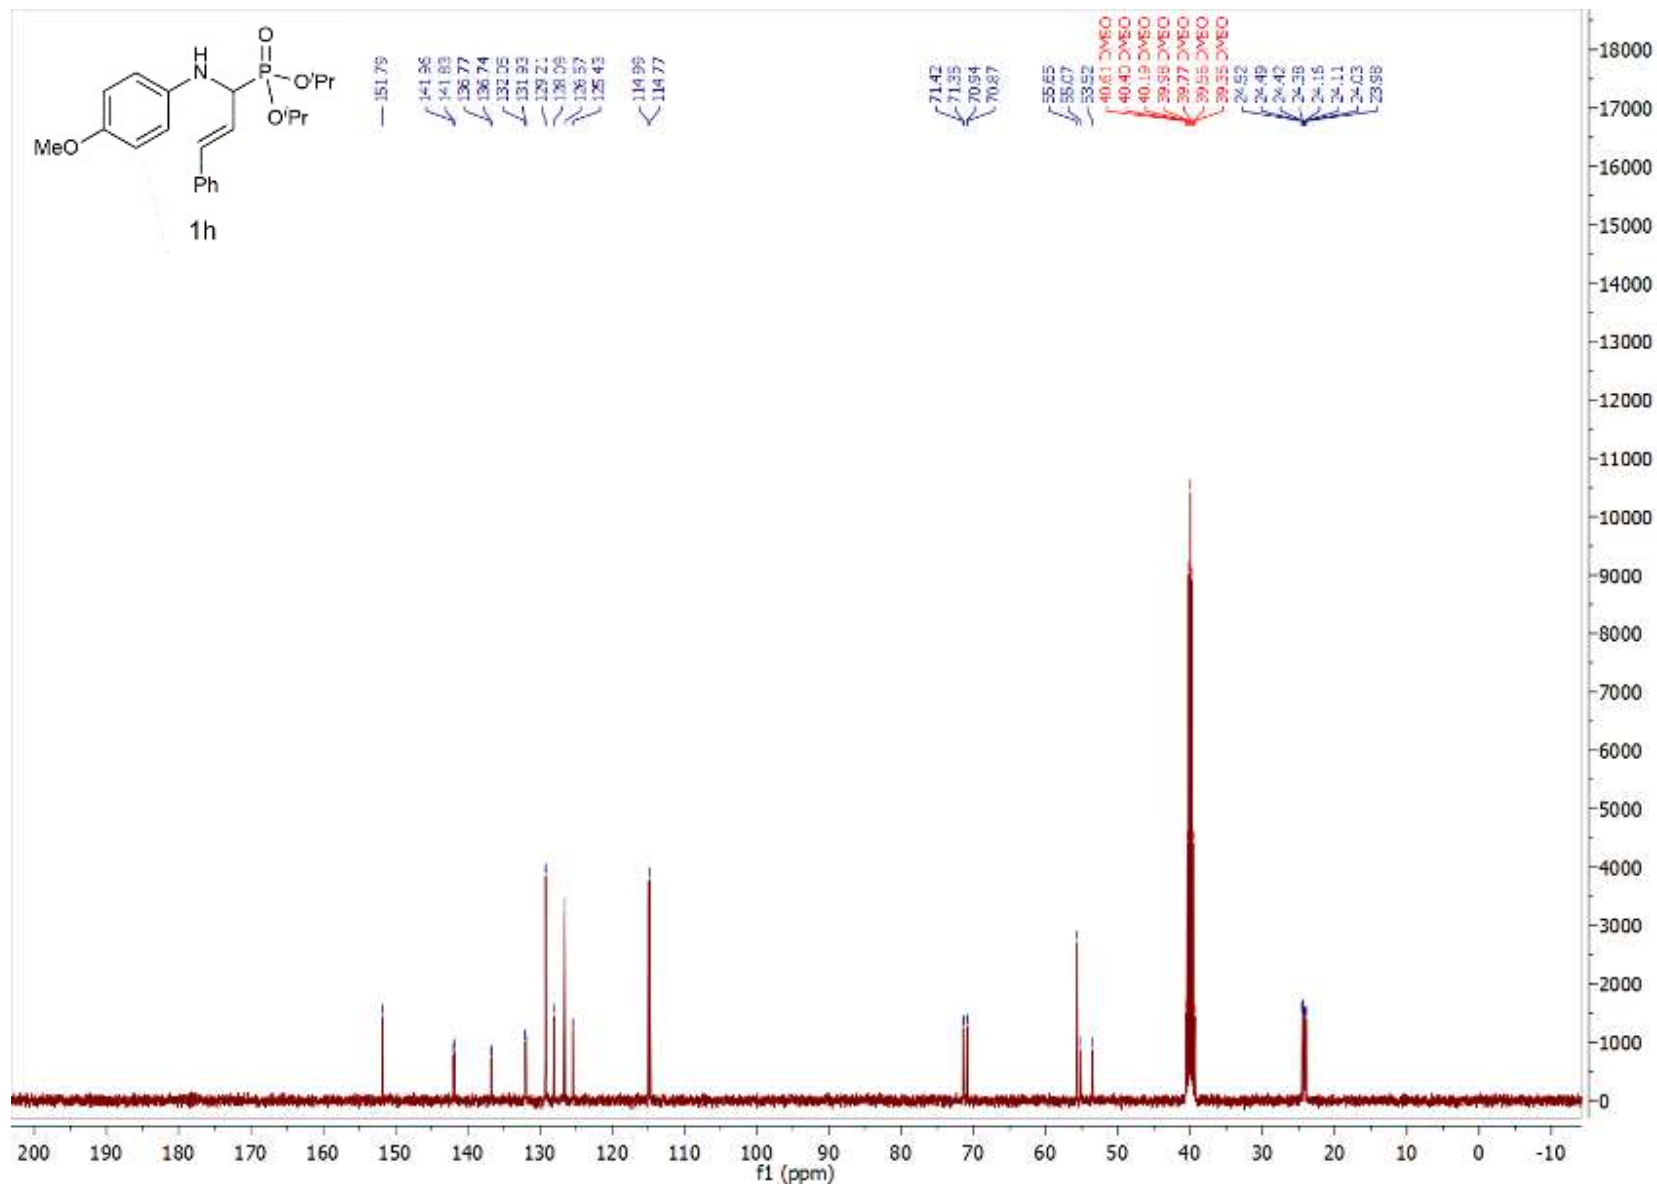

Figure S23:  $^{13}\text{C}$  NMR Spectra of 1h



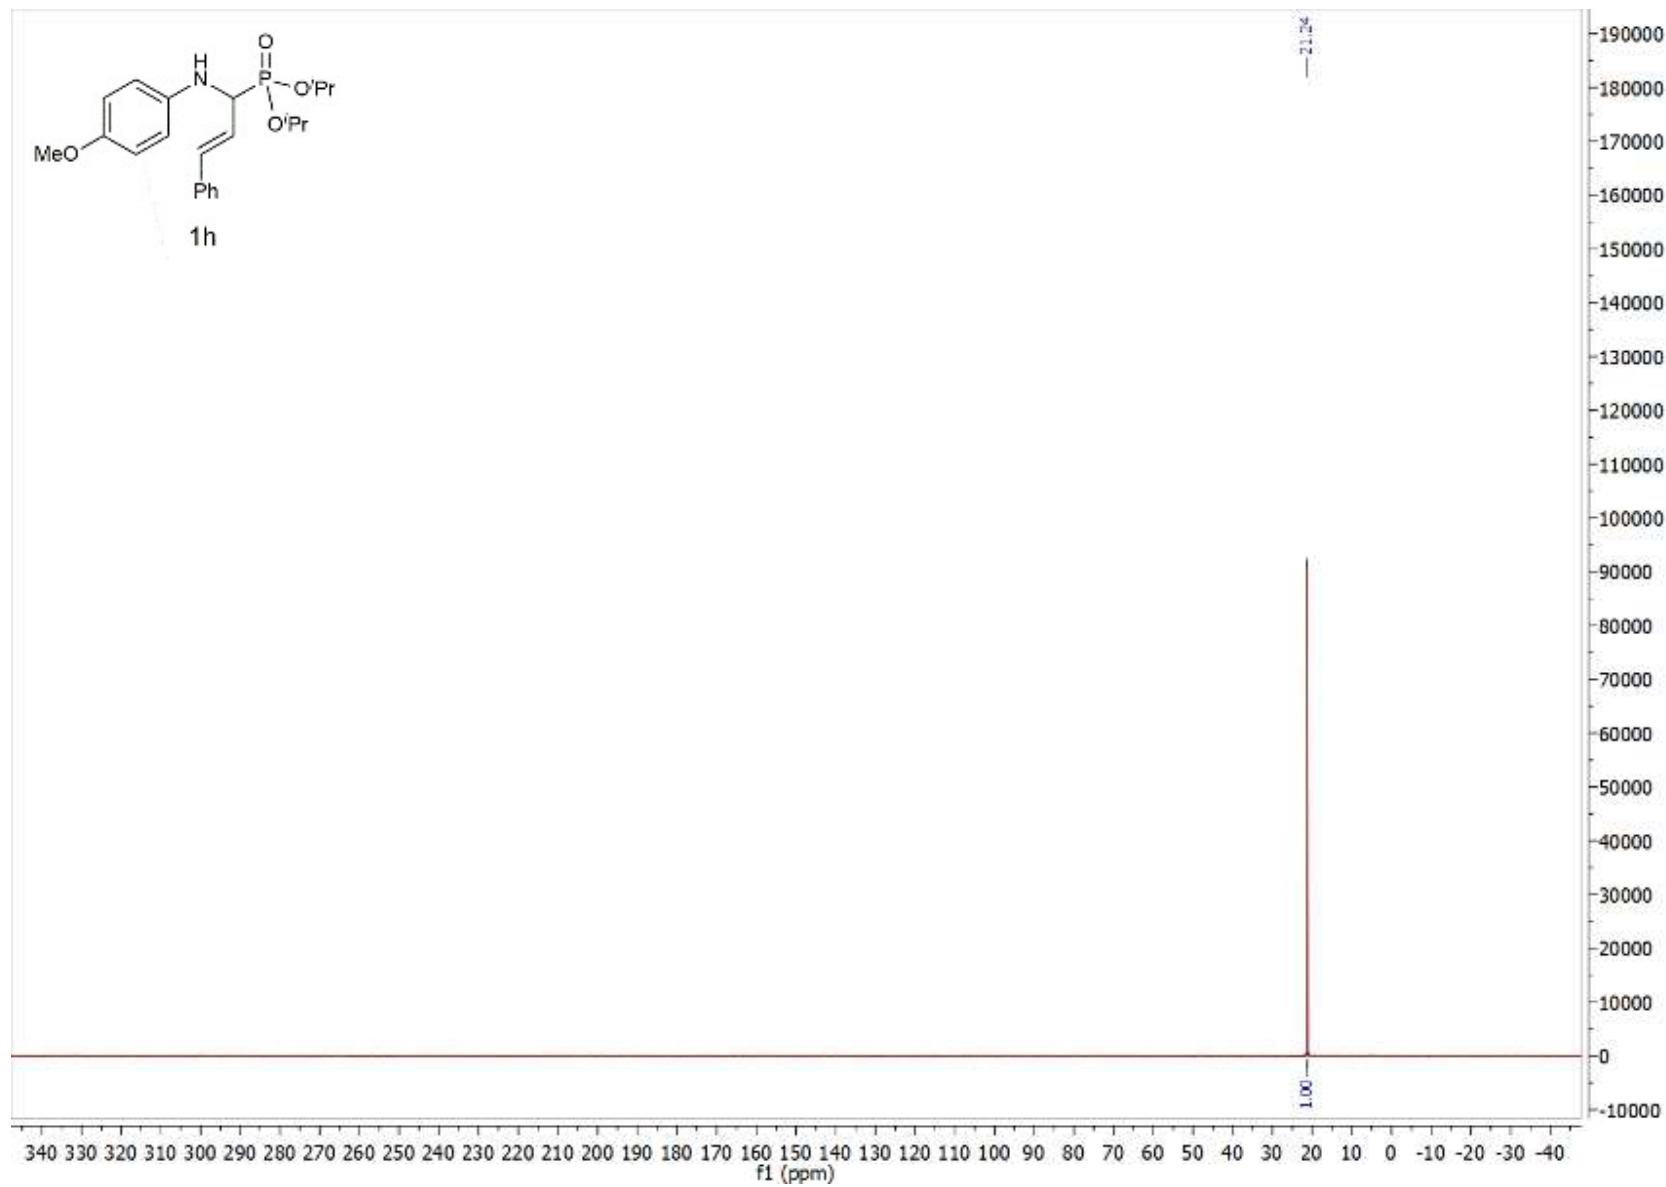

Figure S24:  $^{31}\text{P}$  NMR Spectra of **1h**

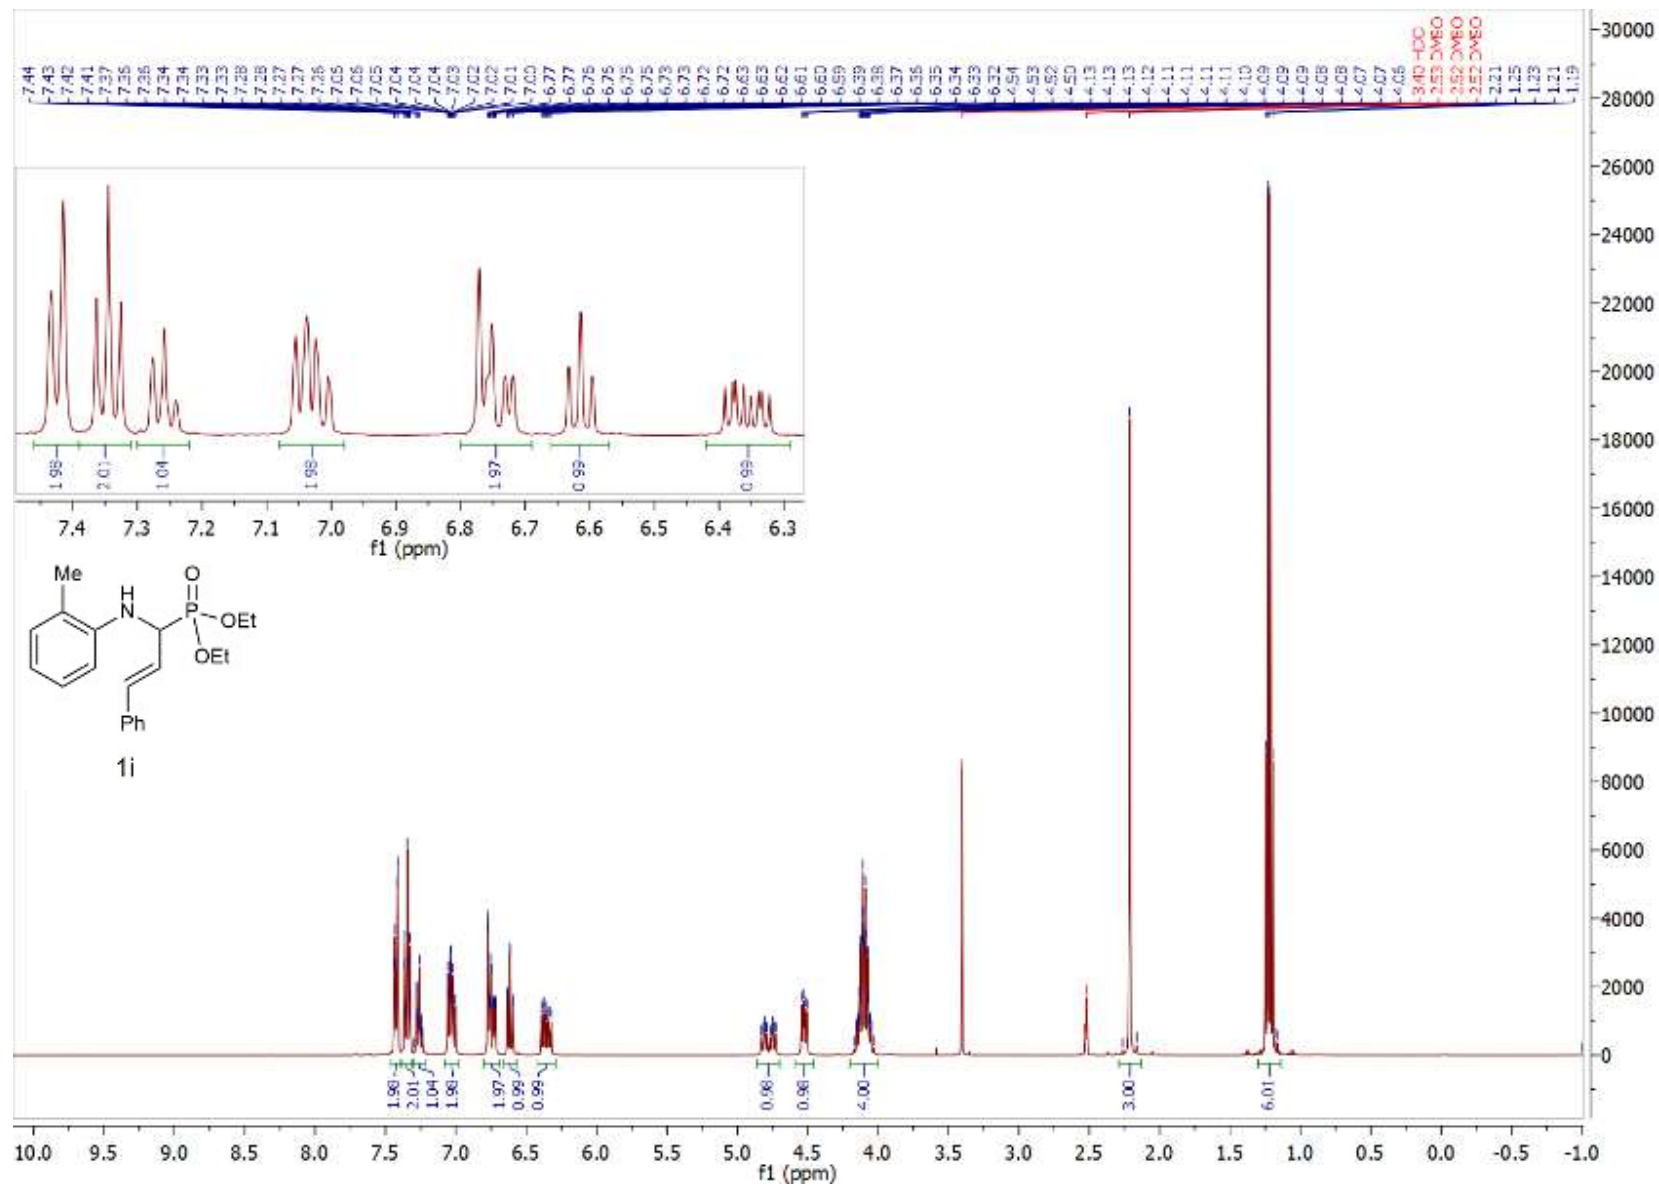

Figure S25:  $^1\text{H}$  NMR Spectra of **1i**

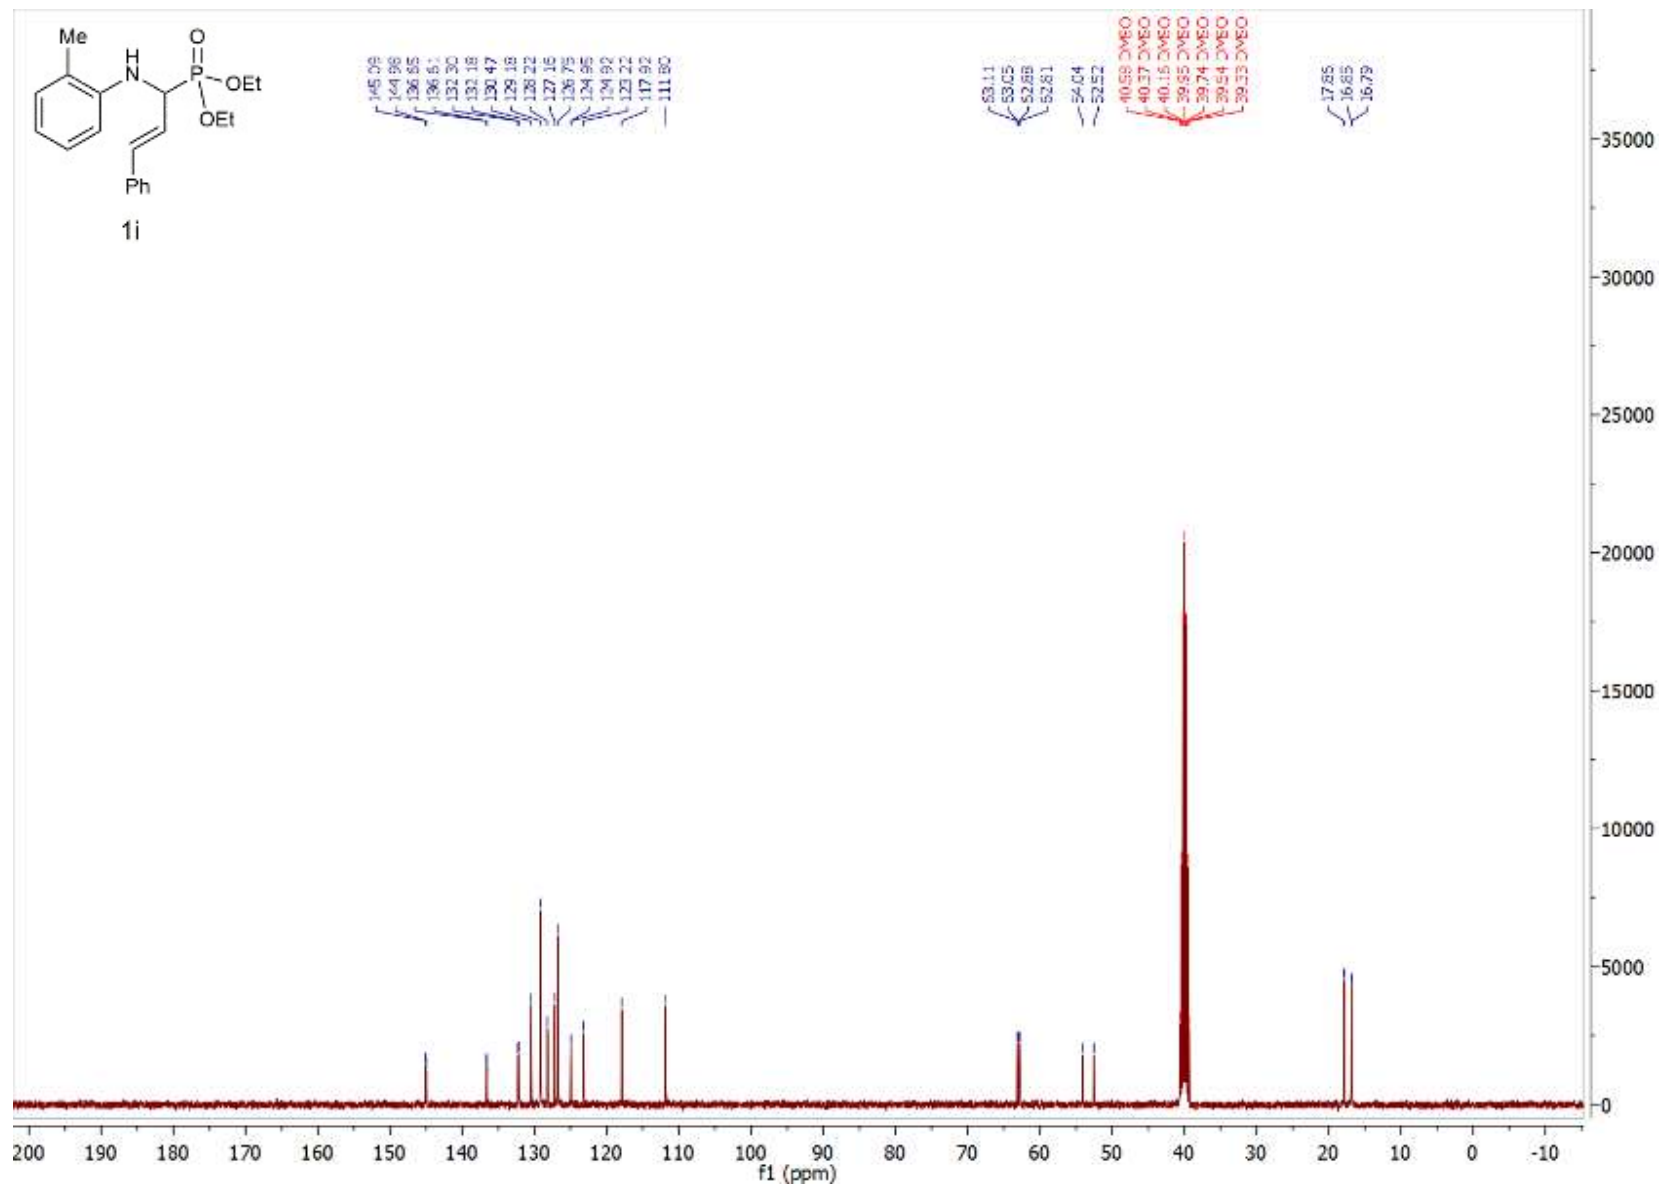

Figure S26: <sup>13</sup>C NMR Spectra of **1i**

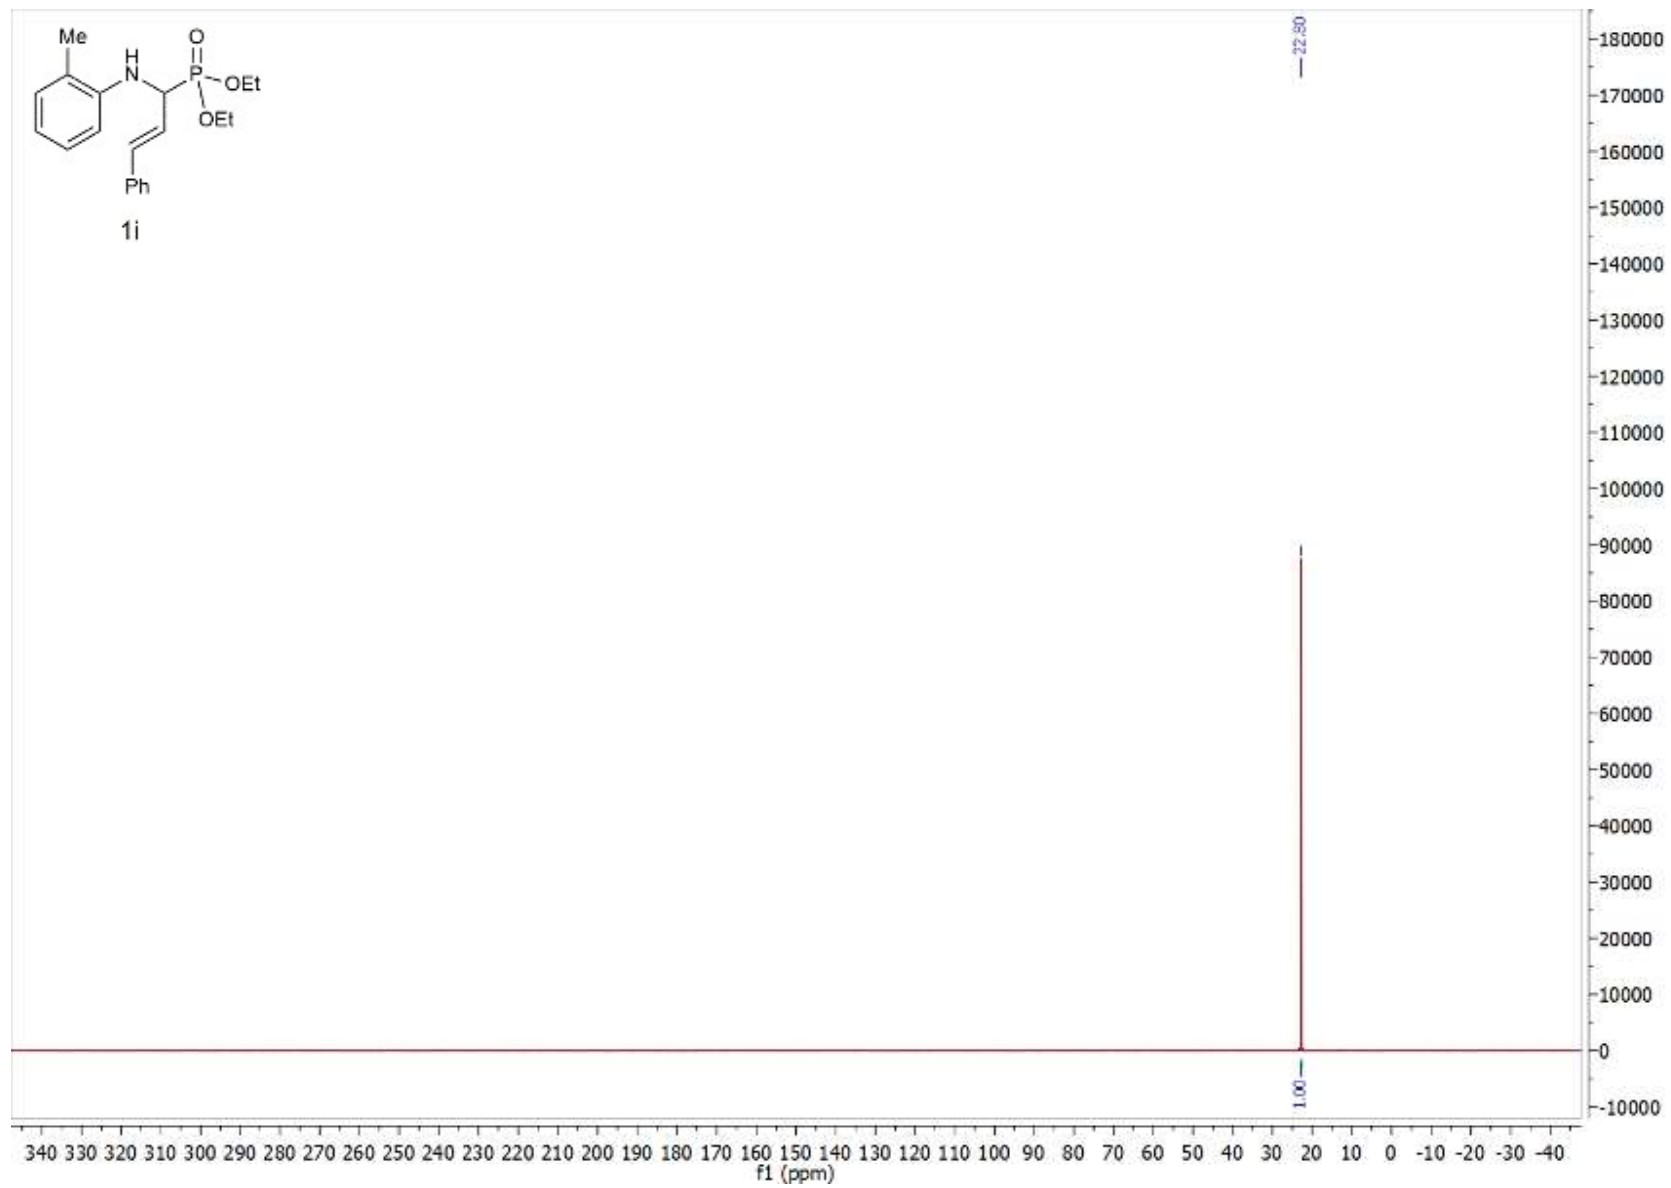

Figure S27:  $^{31}\text{P}$  NMR Spectra of **1i**



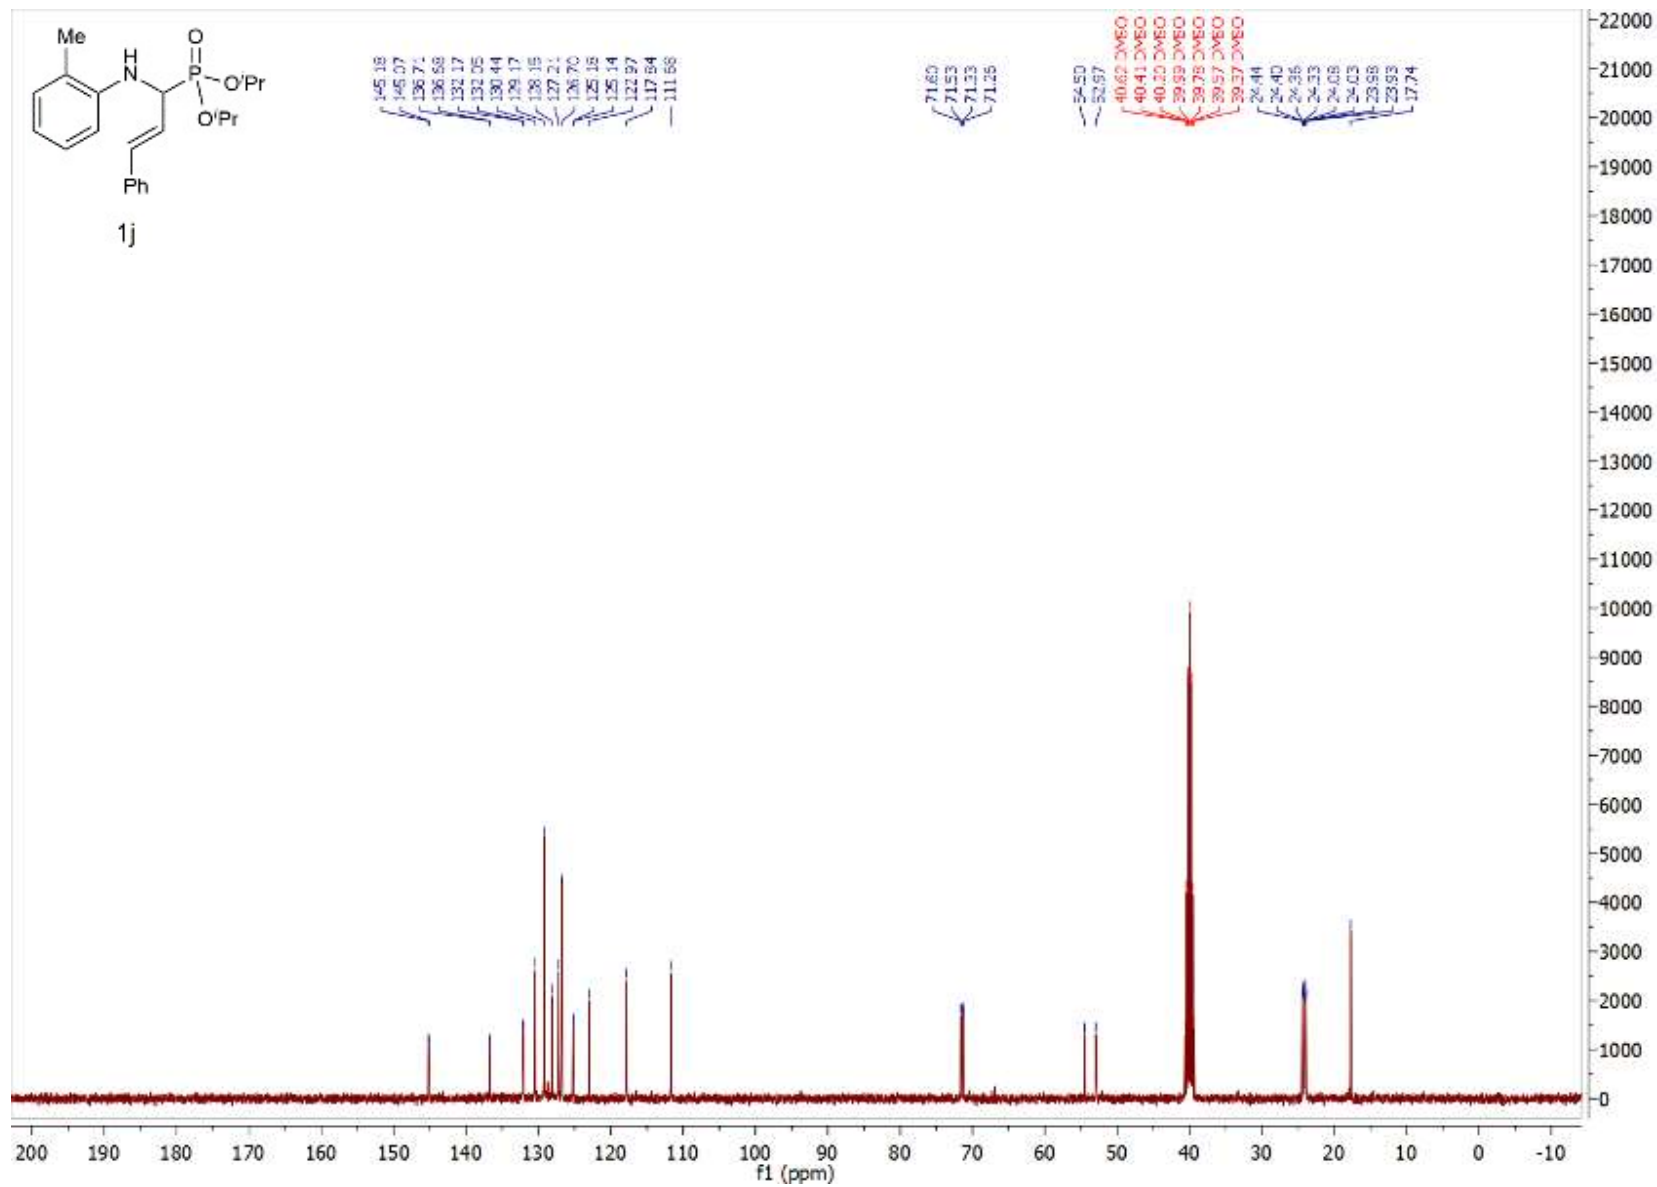

Figure S29: <sup>13</sup>C NMR Spectra of 1j

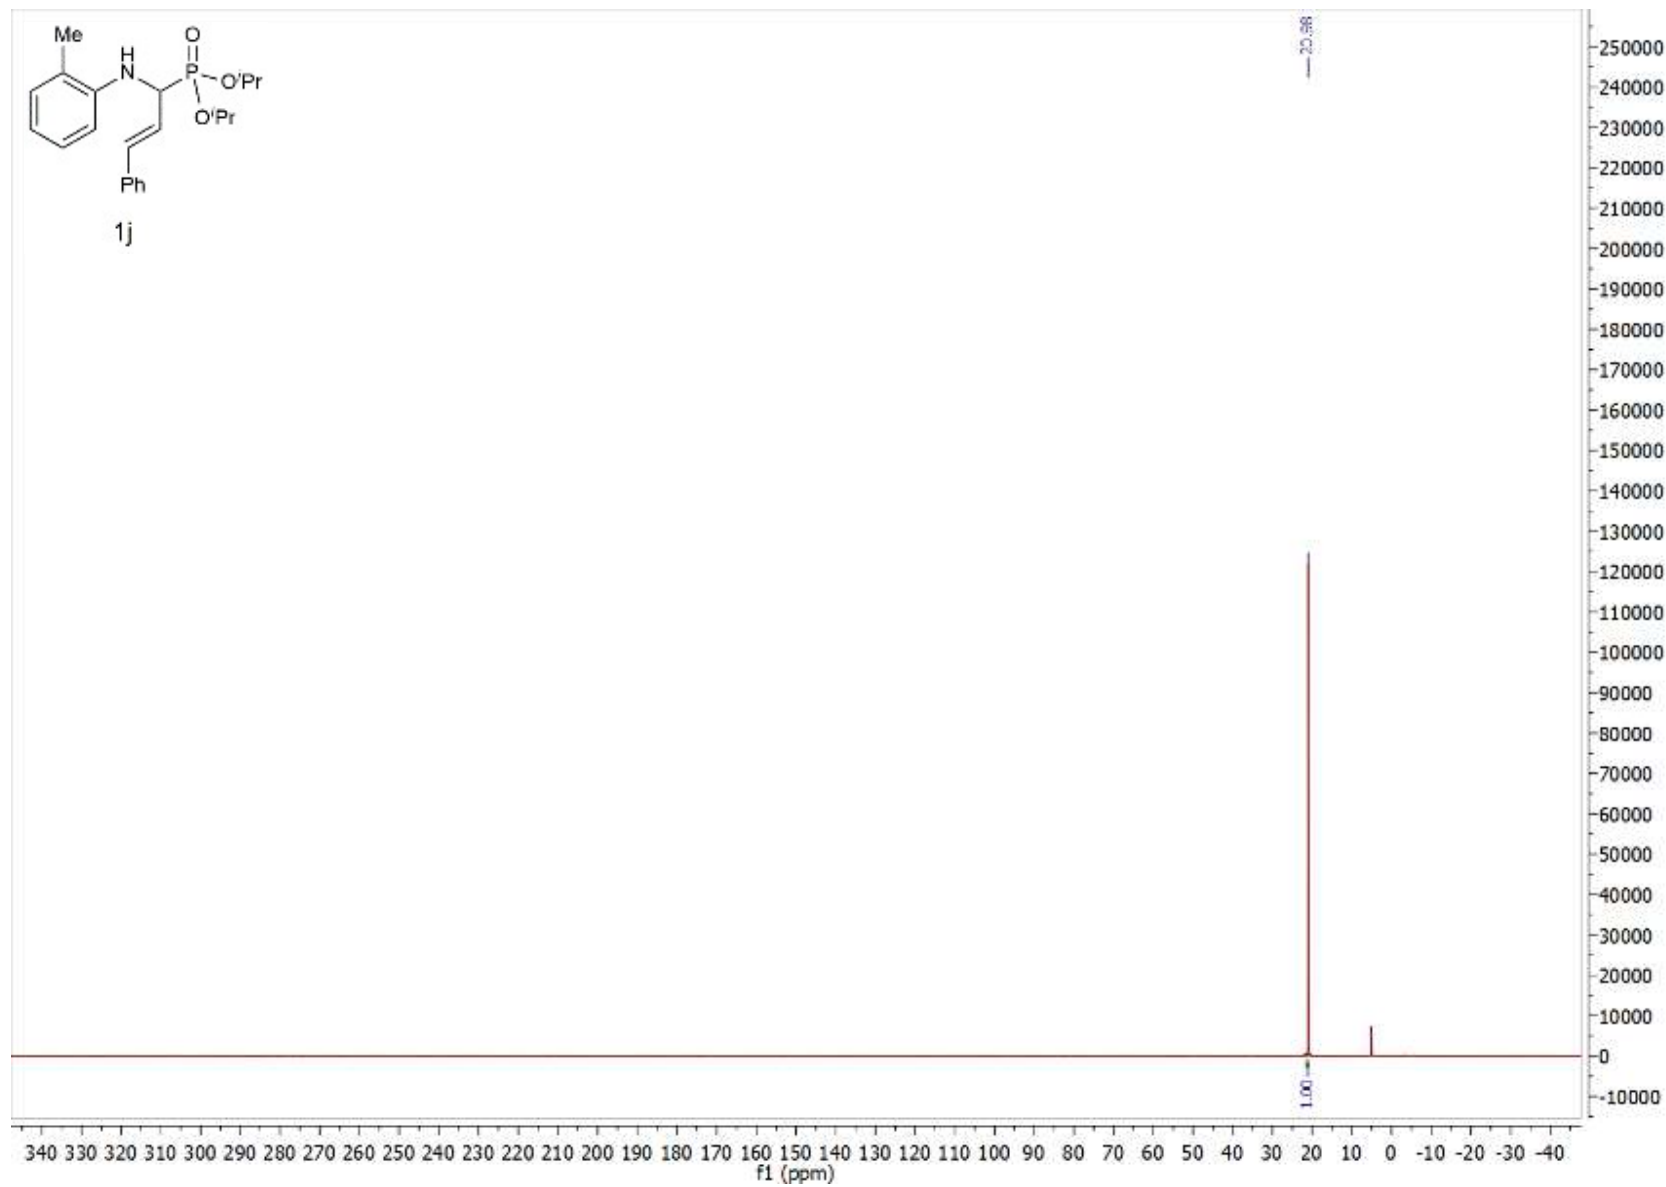

Figure S30:  $^{31}\text{P}$  NMR Spectra of 1j

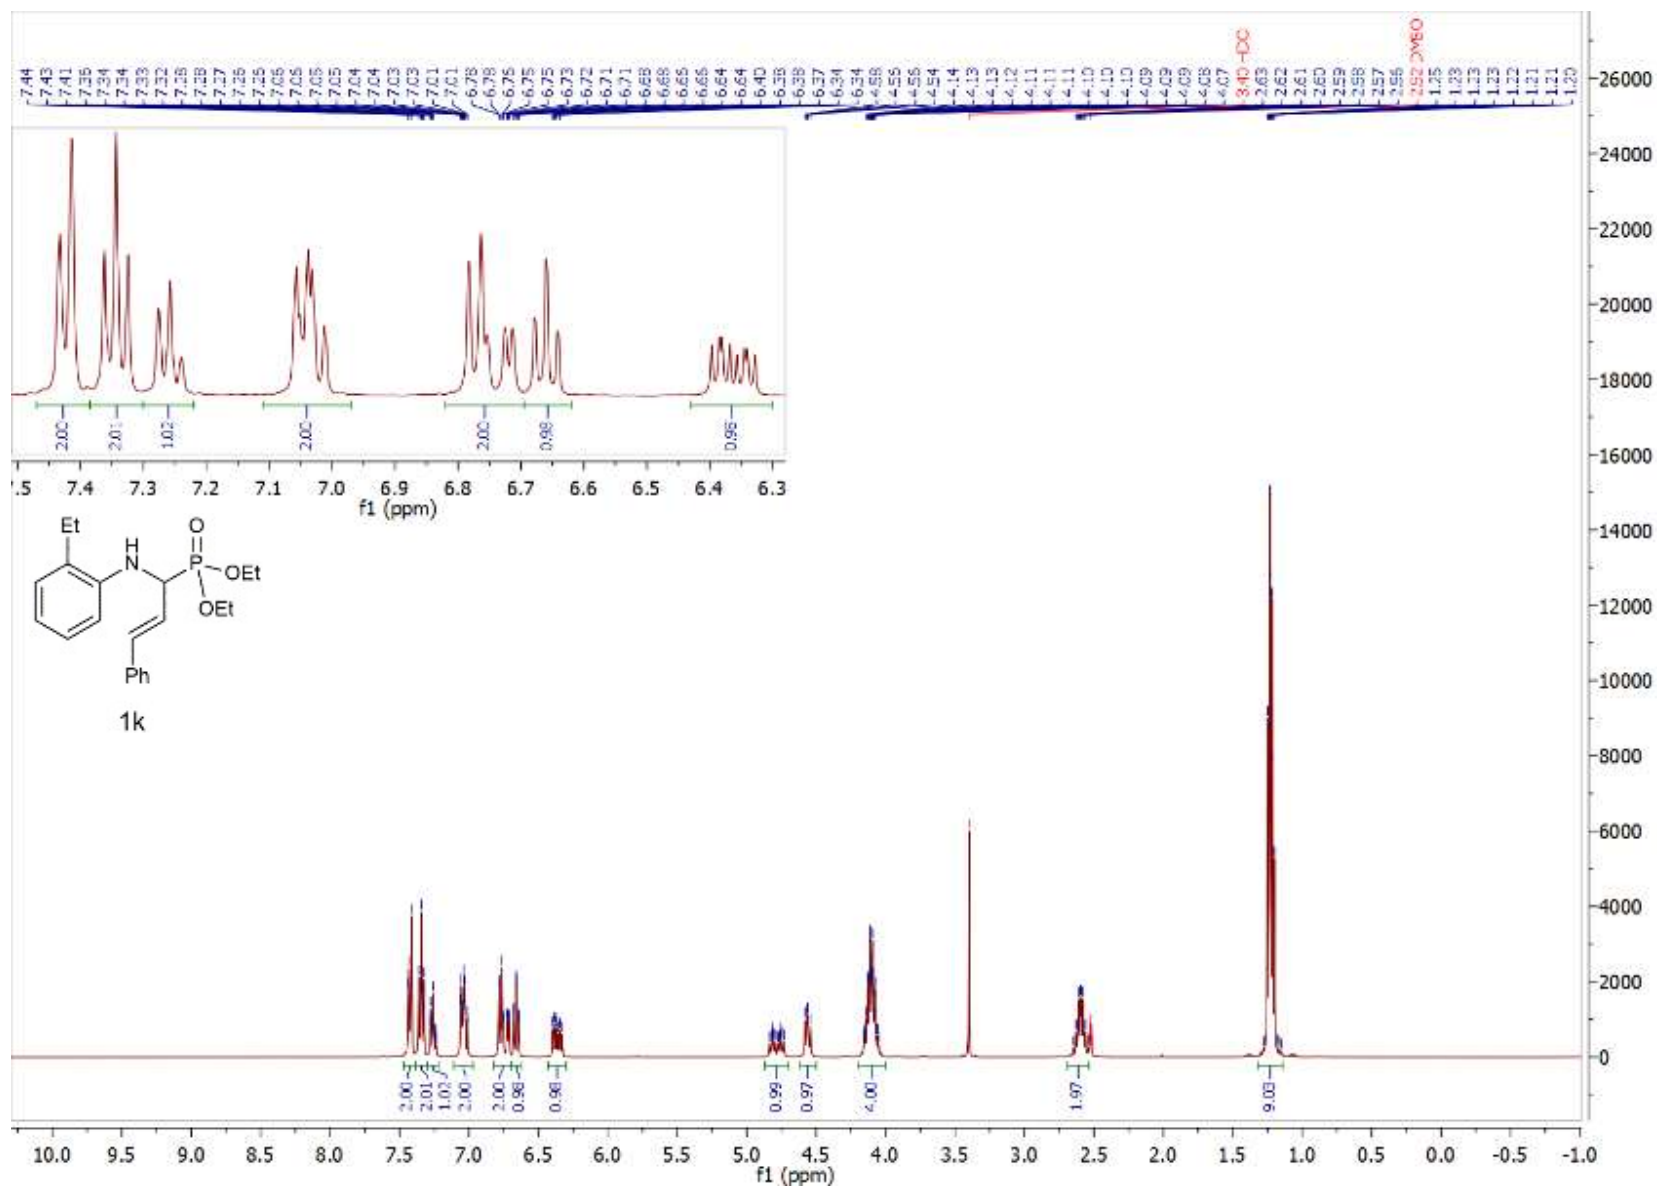

Figure S31:  $^1\text{H}$  NMR Spectra of 1k



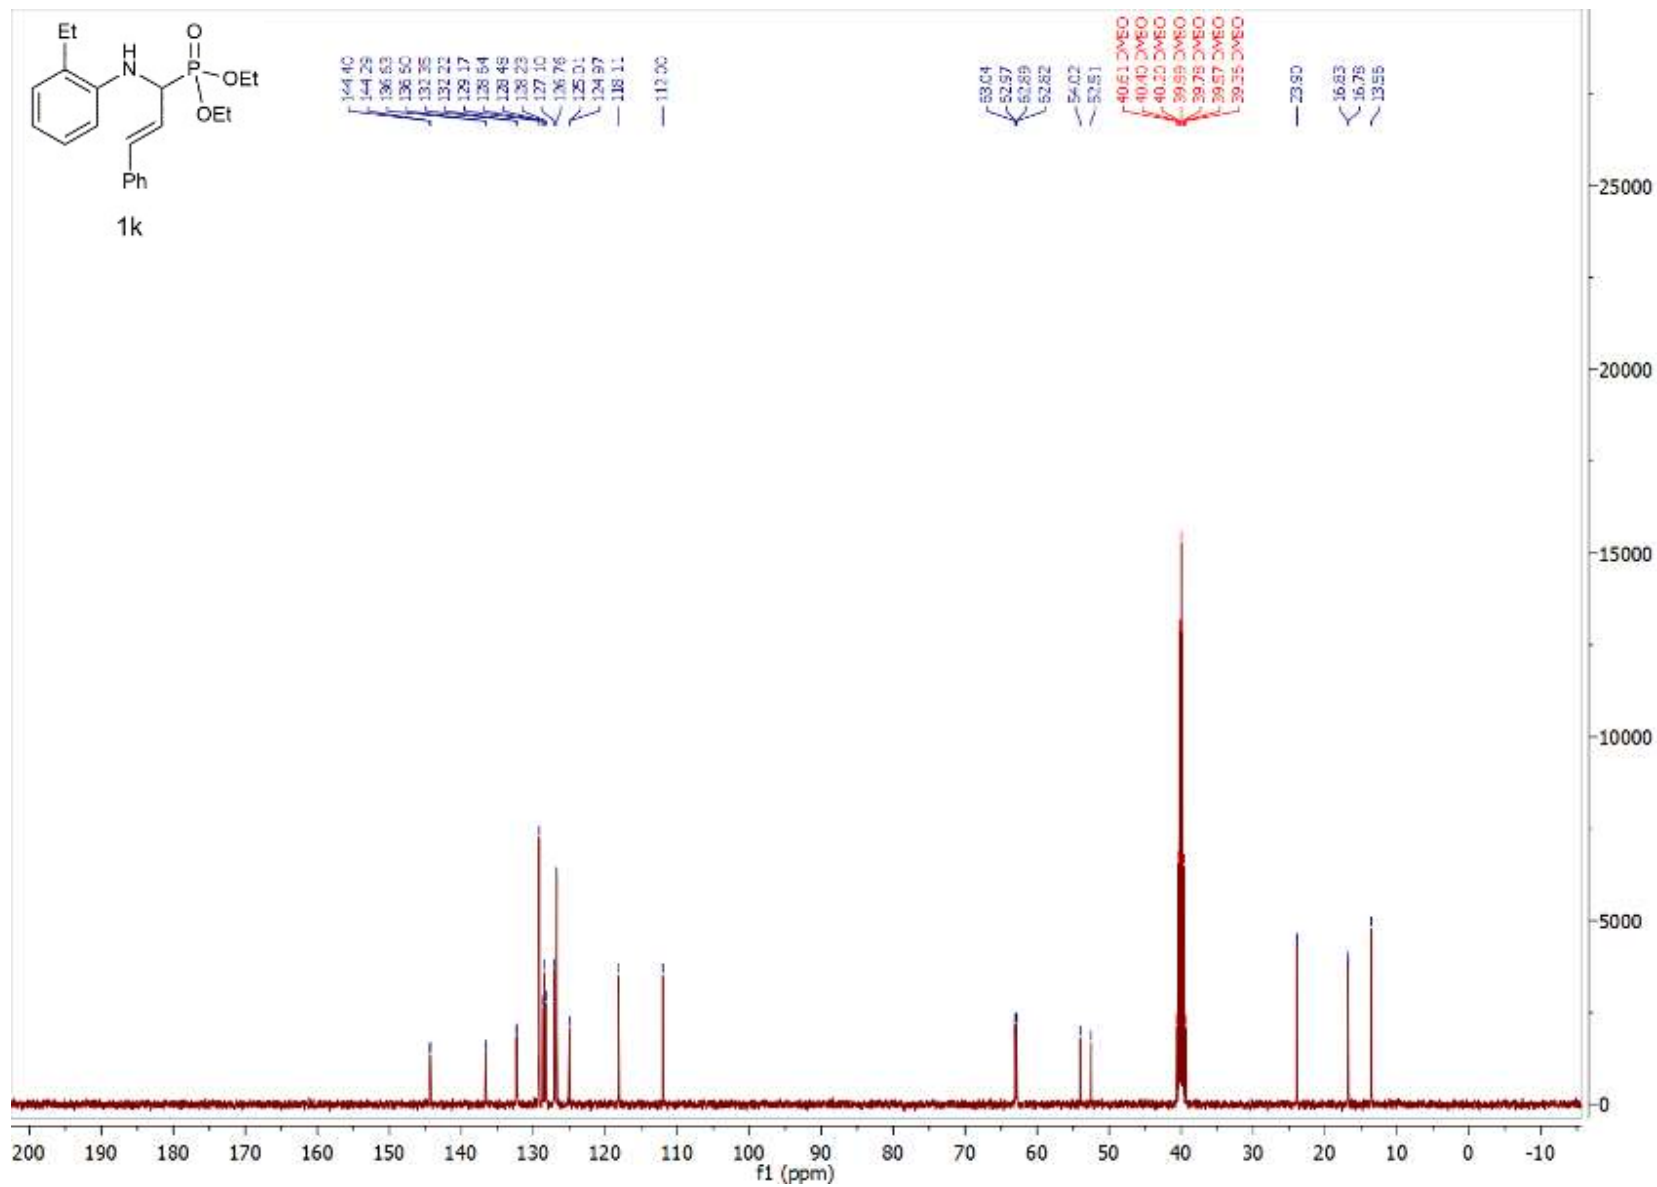

Figure S32: <sup>13</sup>C NMR Spectra of 1k

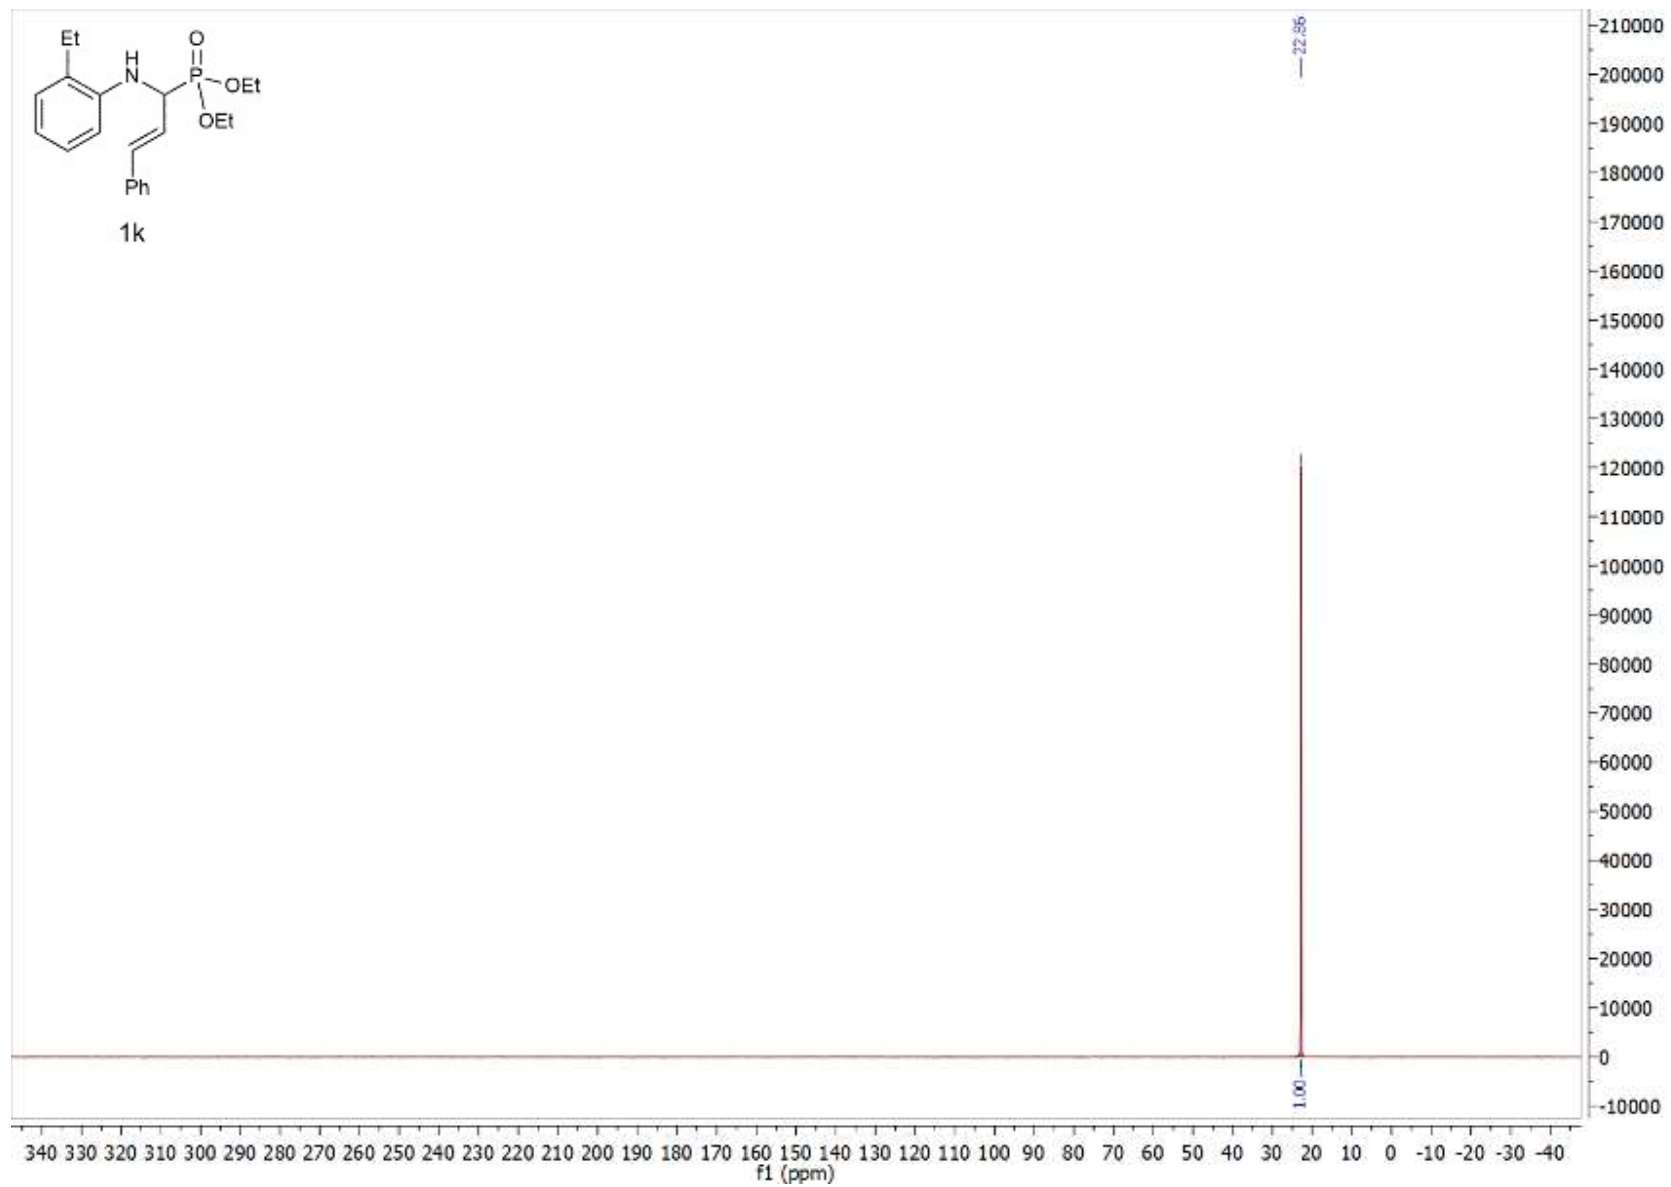

Figure S33:  $^{31}\text{P}$  NMR Spectra of 1k

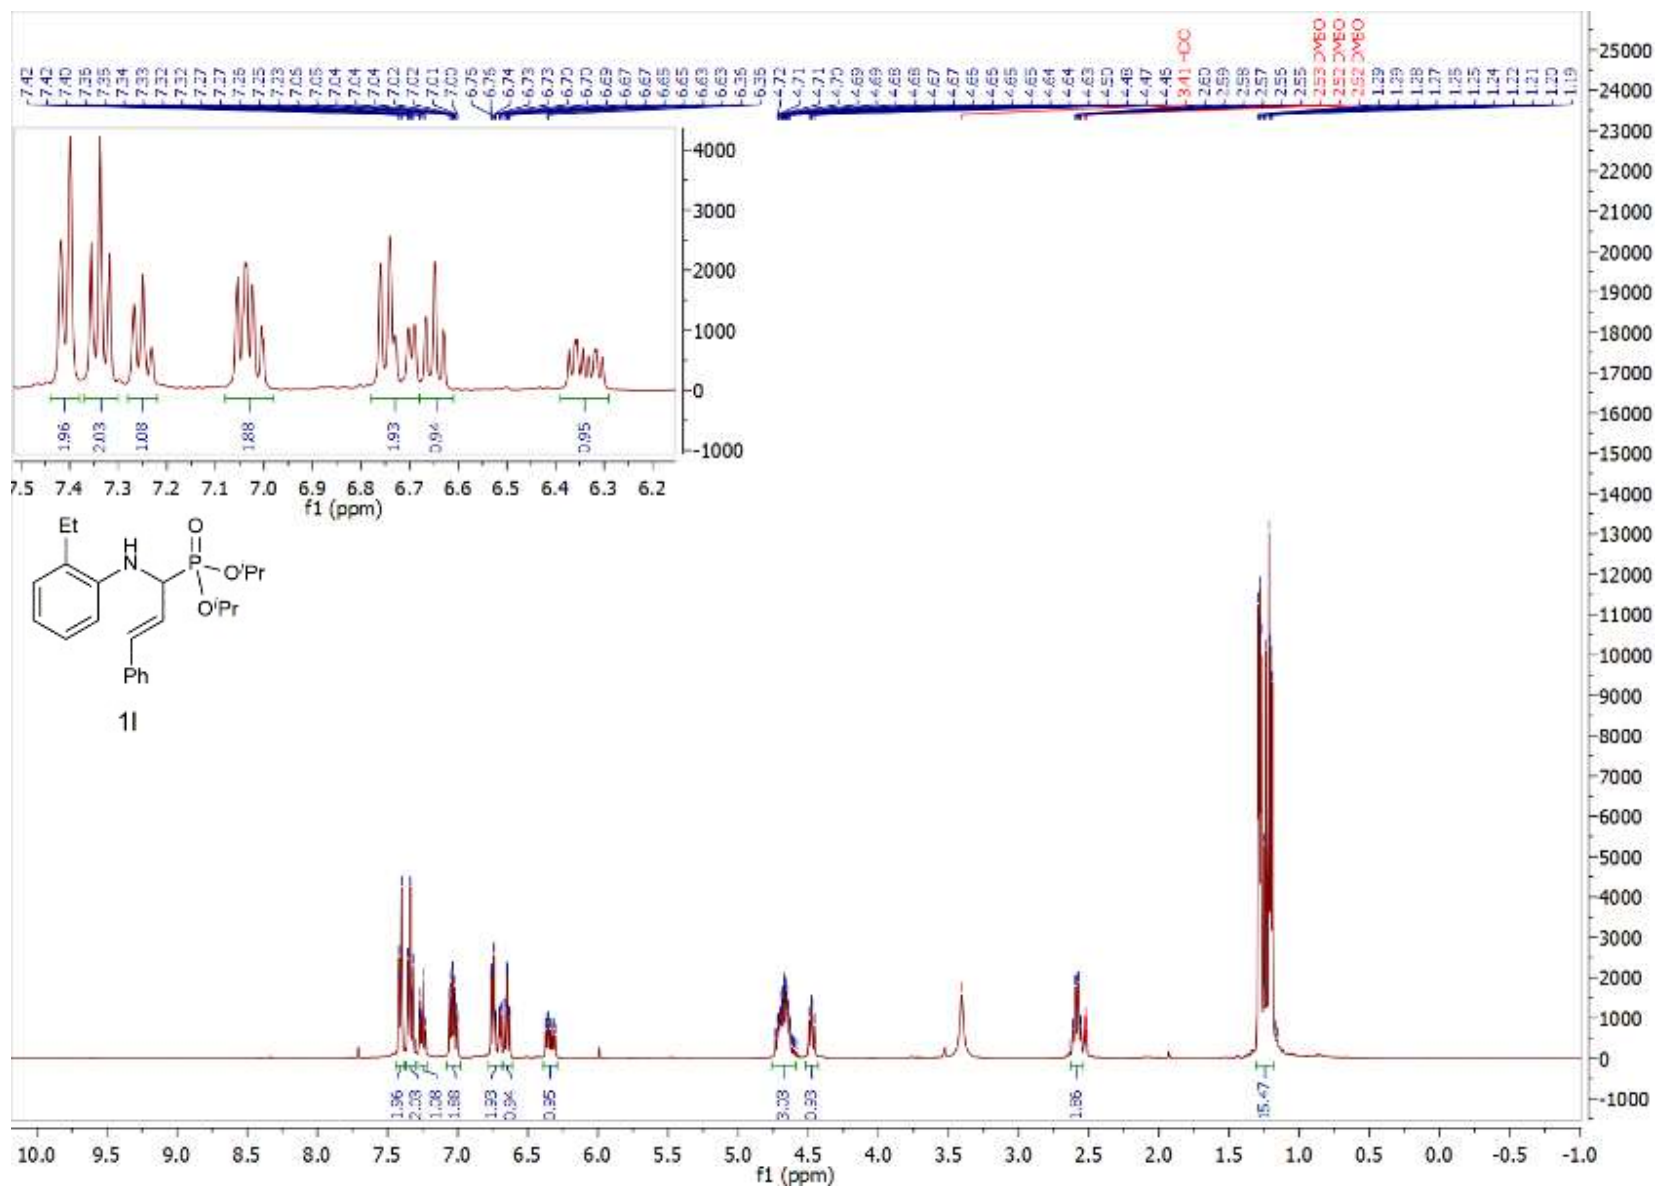

Figure S34: <sup>1</sup>H NMR Spectra of **11**

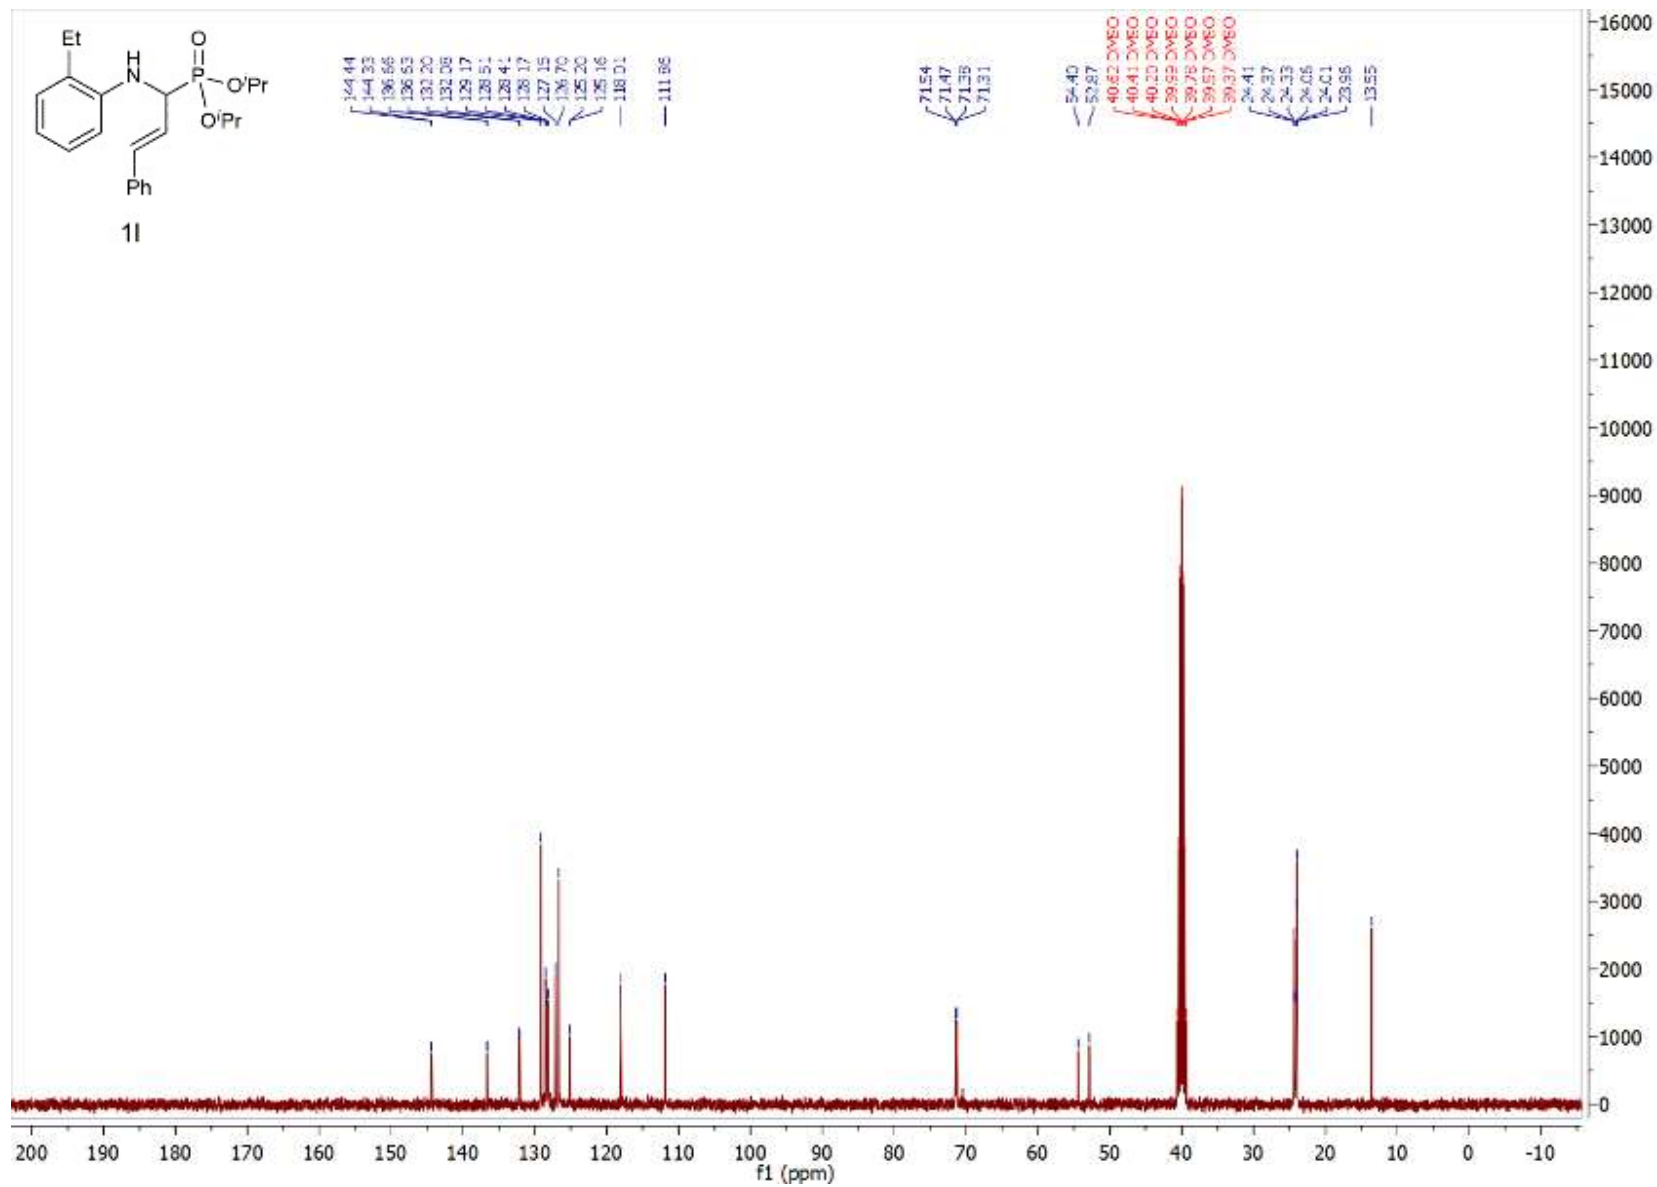

Figure S35:  $^{13}\text{C}$  NMR Spectra of 11

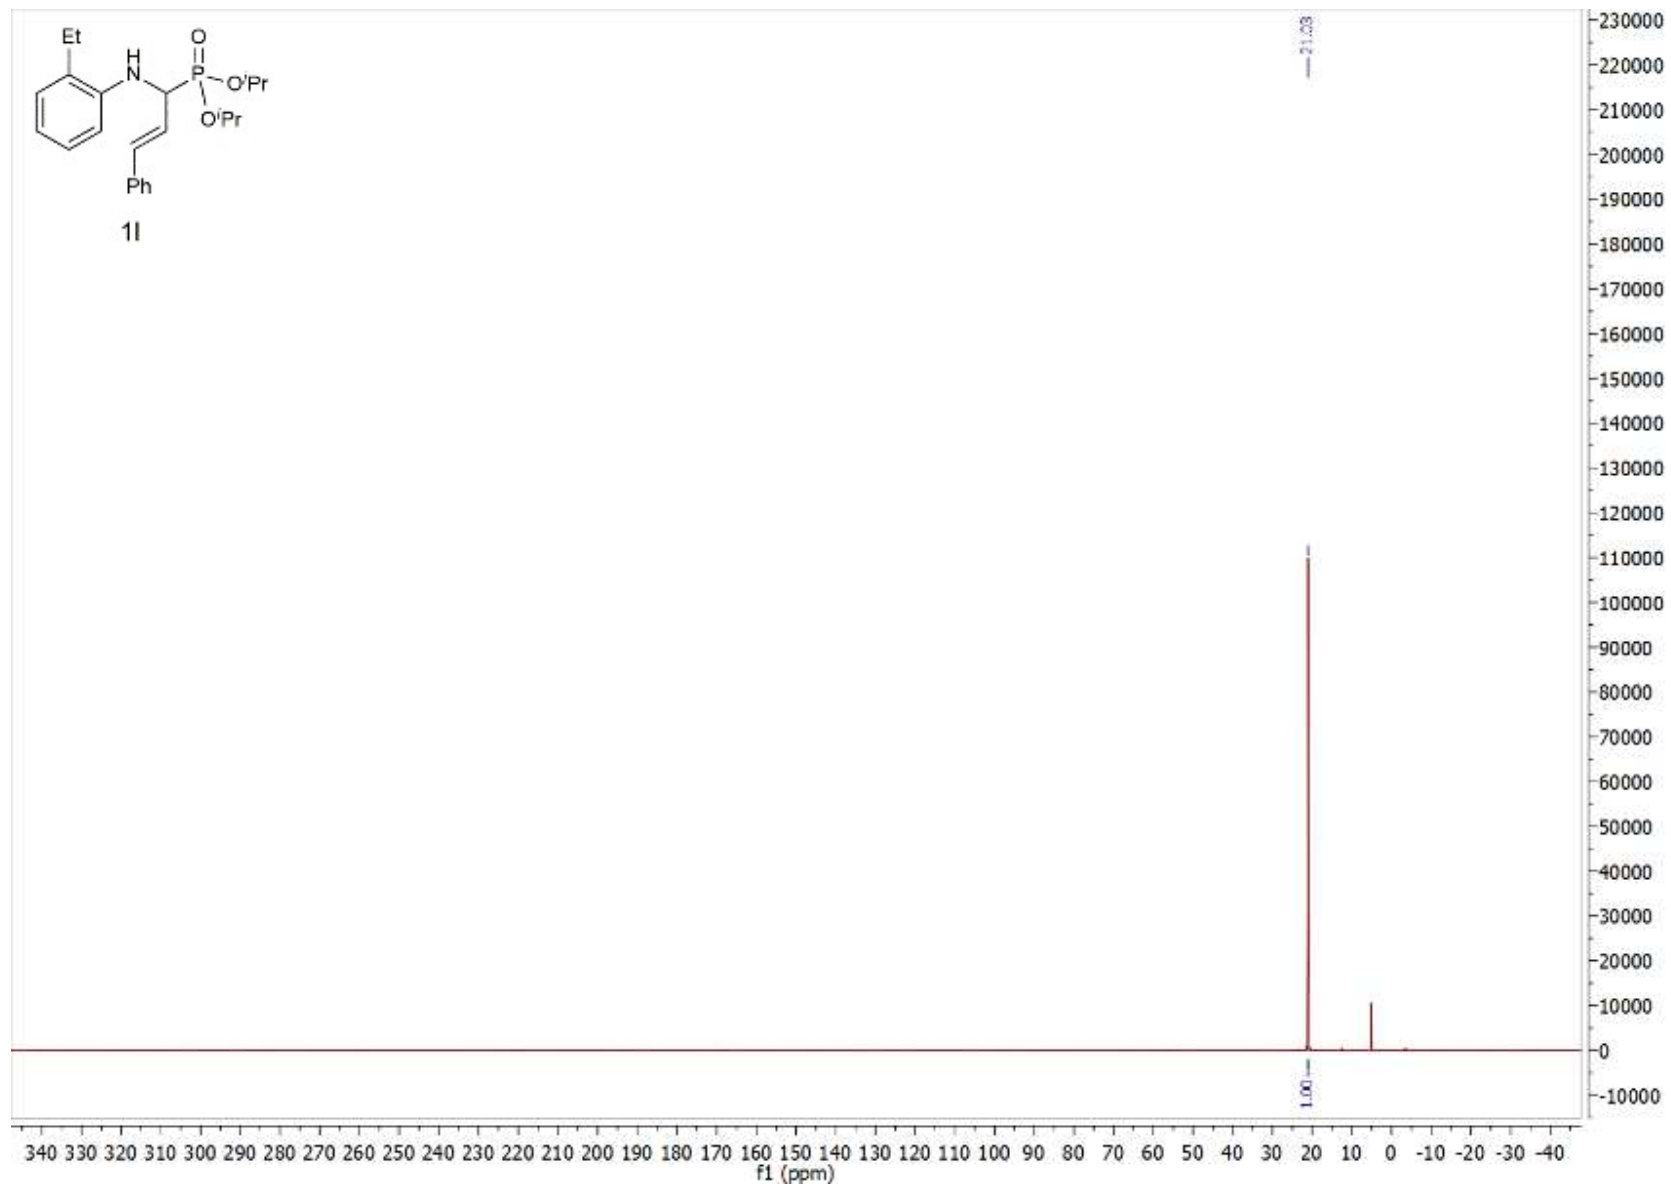

Figure S36:  $^{31}\text{P}$  NMR Spectra of 11

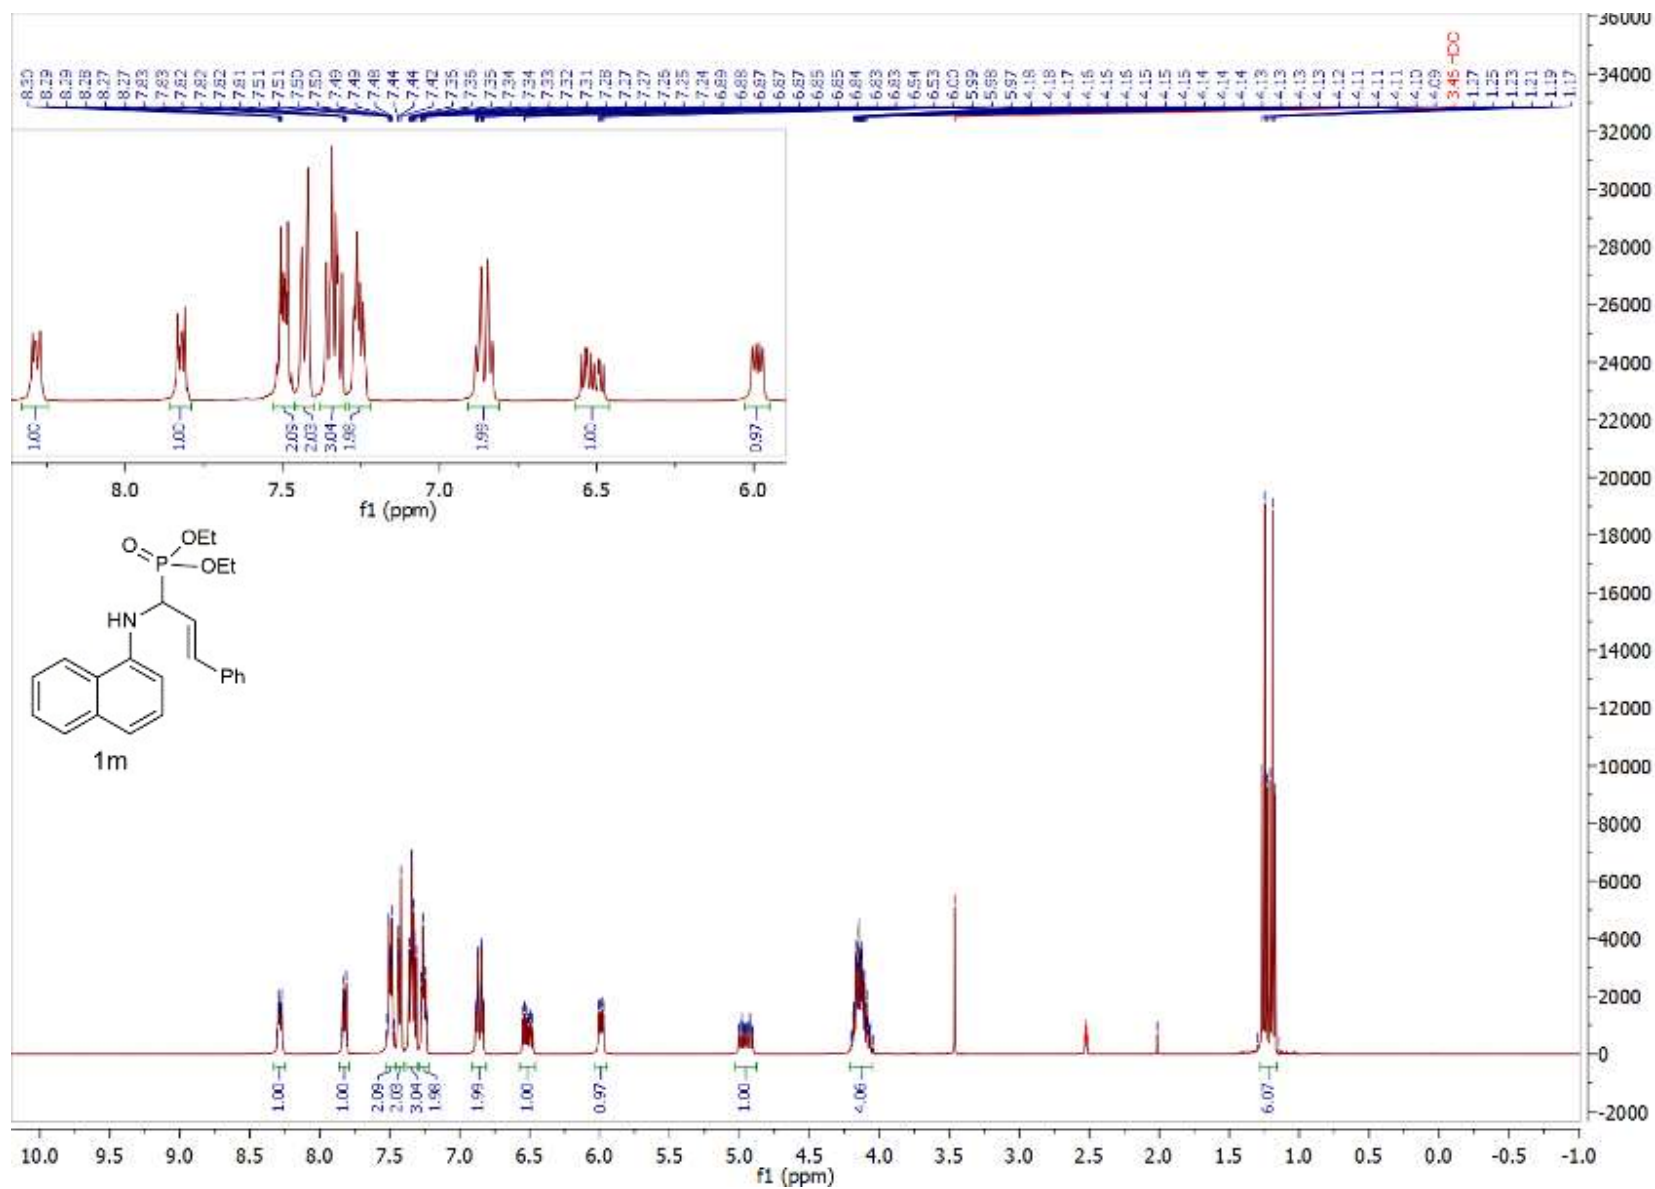

Figure S37: <sup>1</sup>H NMR Spectra of 1m

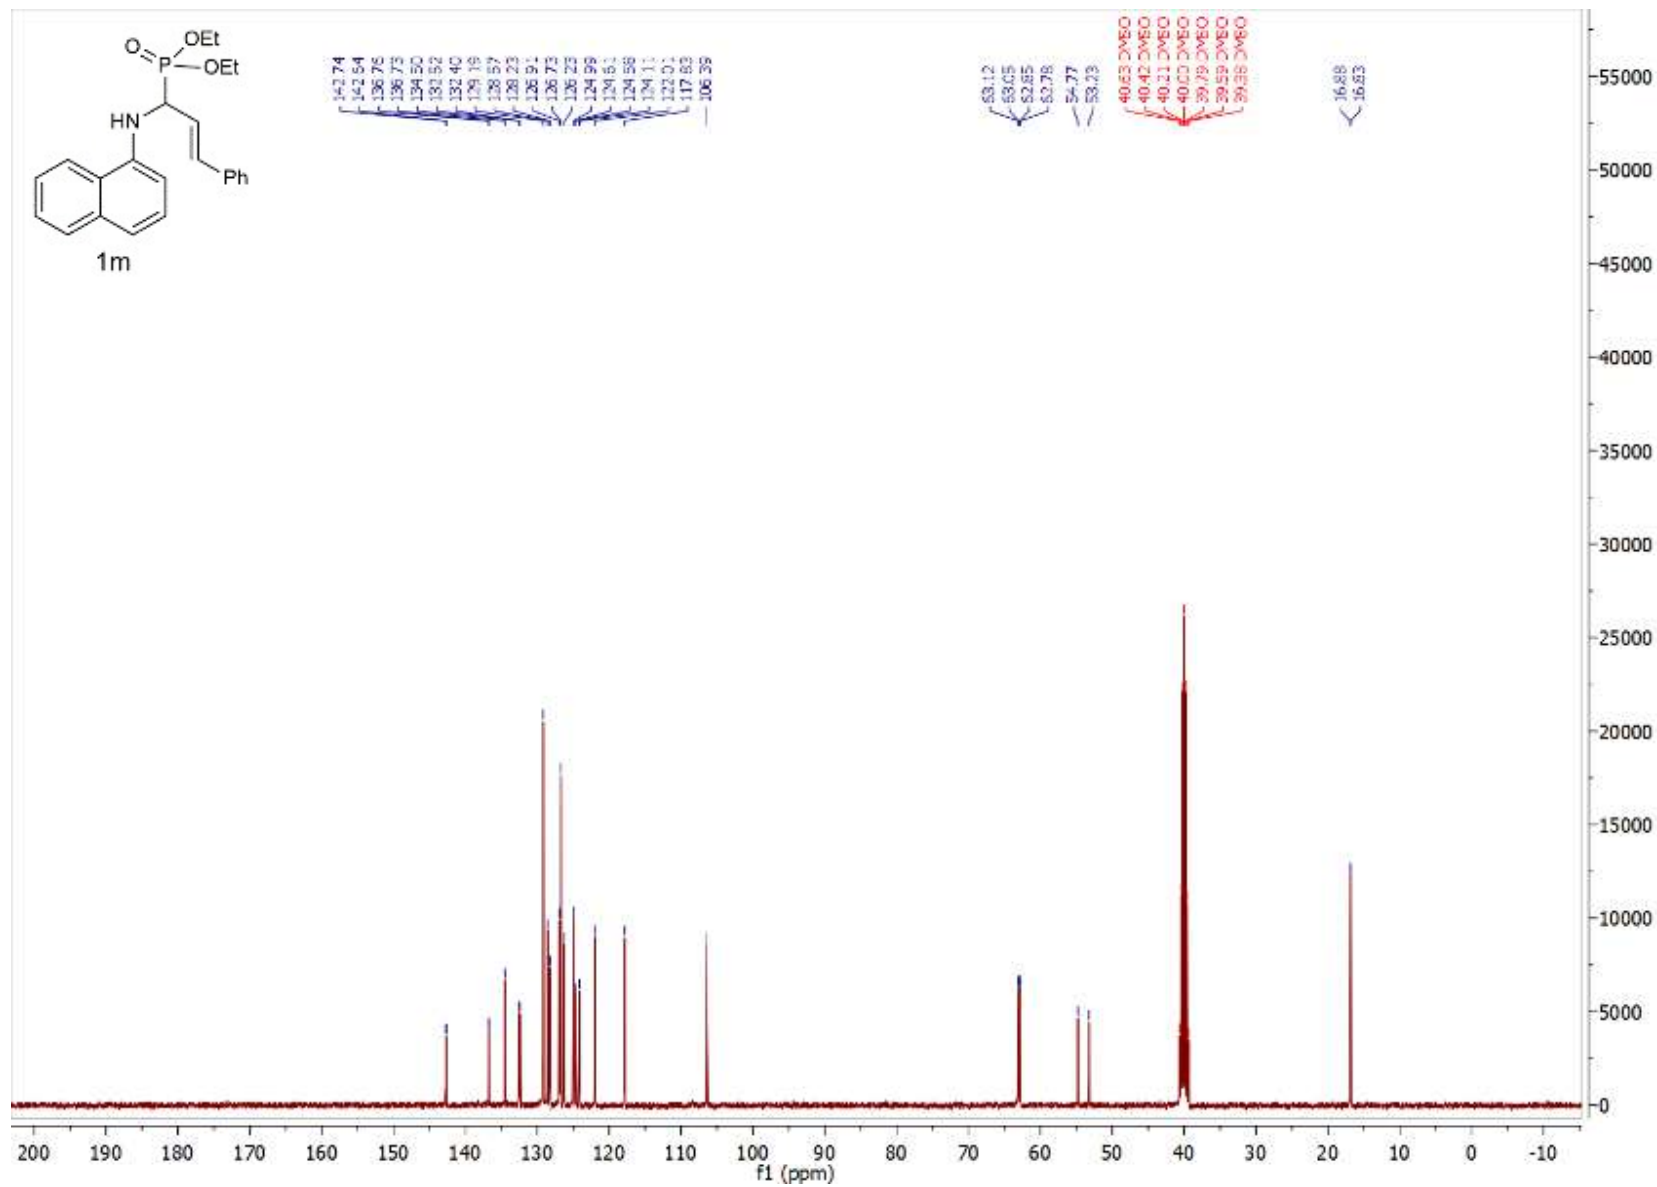

Figure S38: <sup>13</sup>C NMR Spectra of 1m

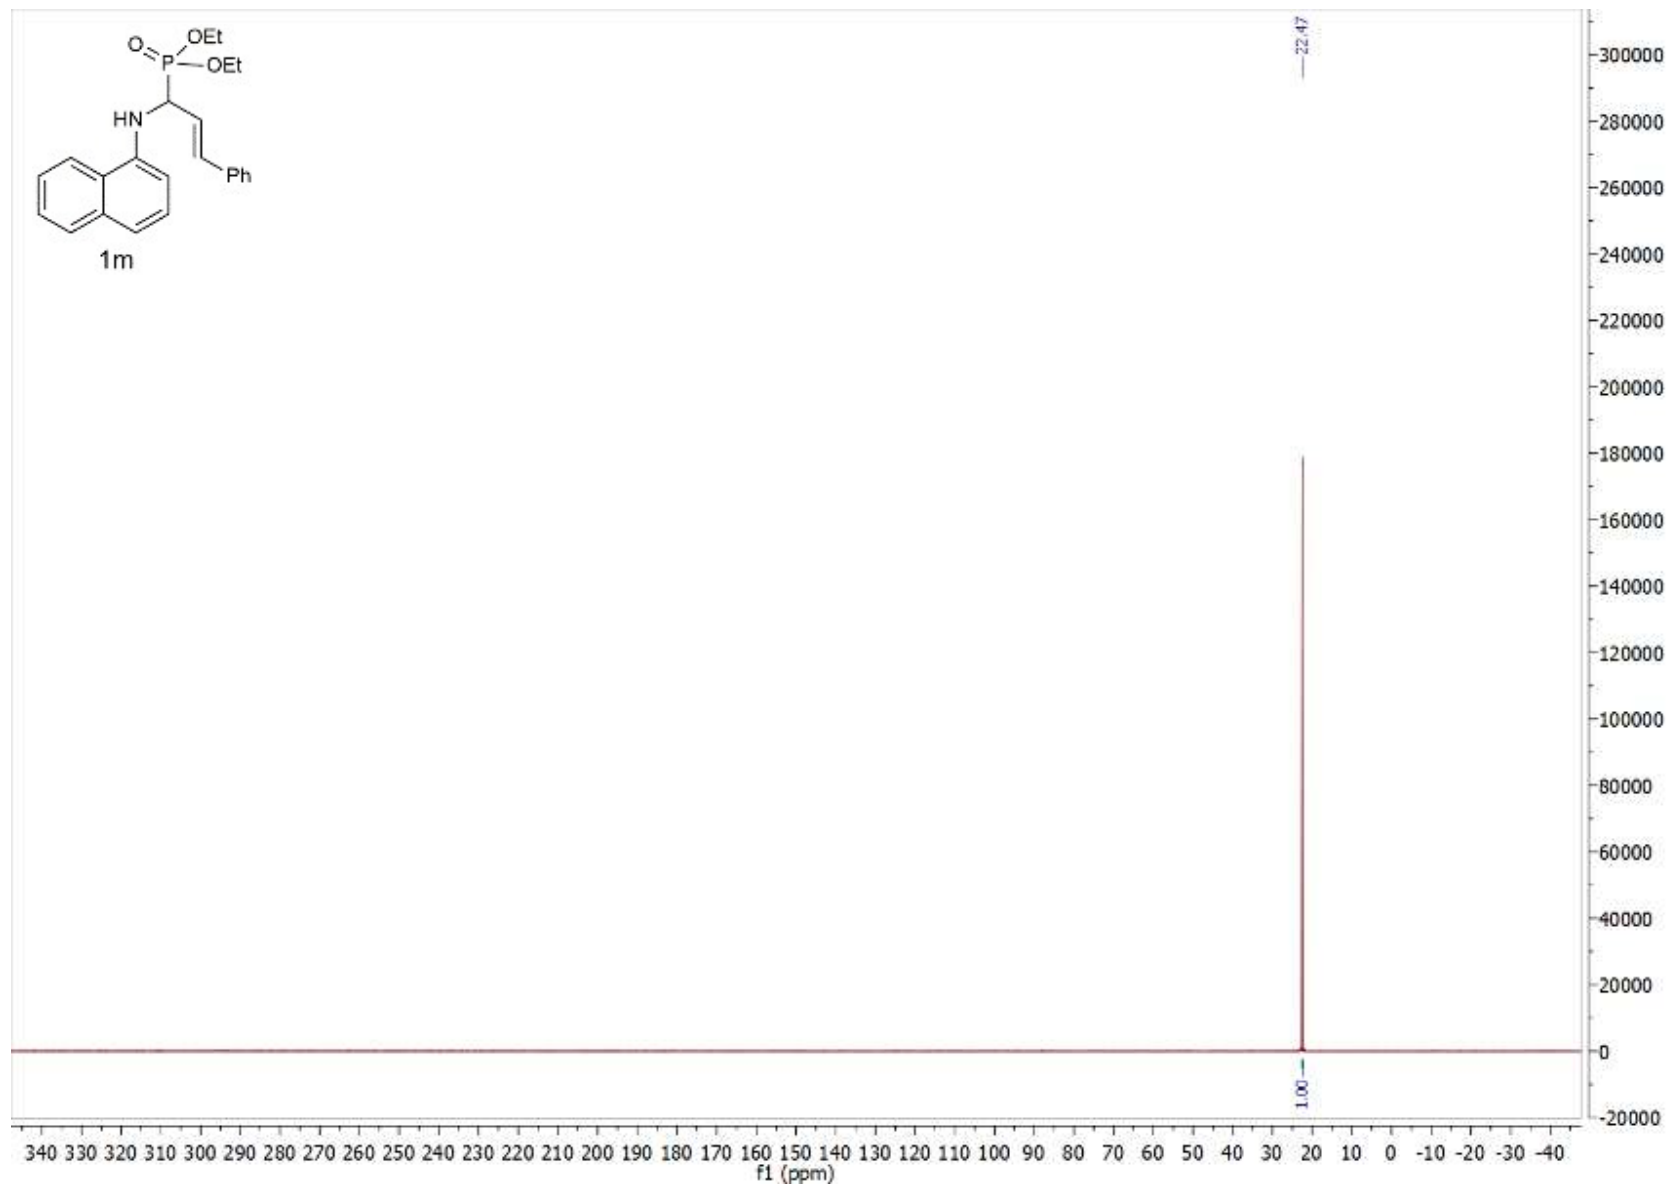

Figure S39:  $^{31}\text{P}$  NMR Spectra of **1m**



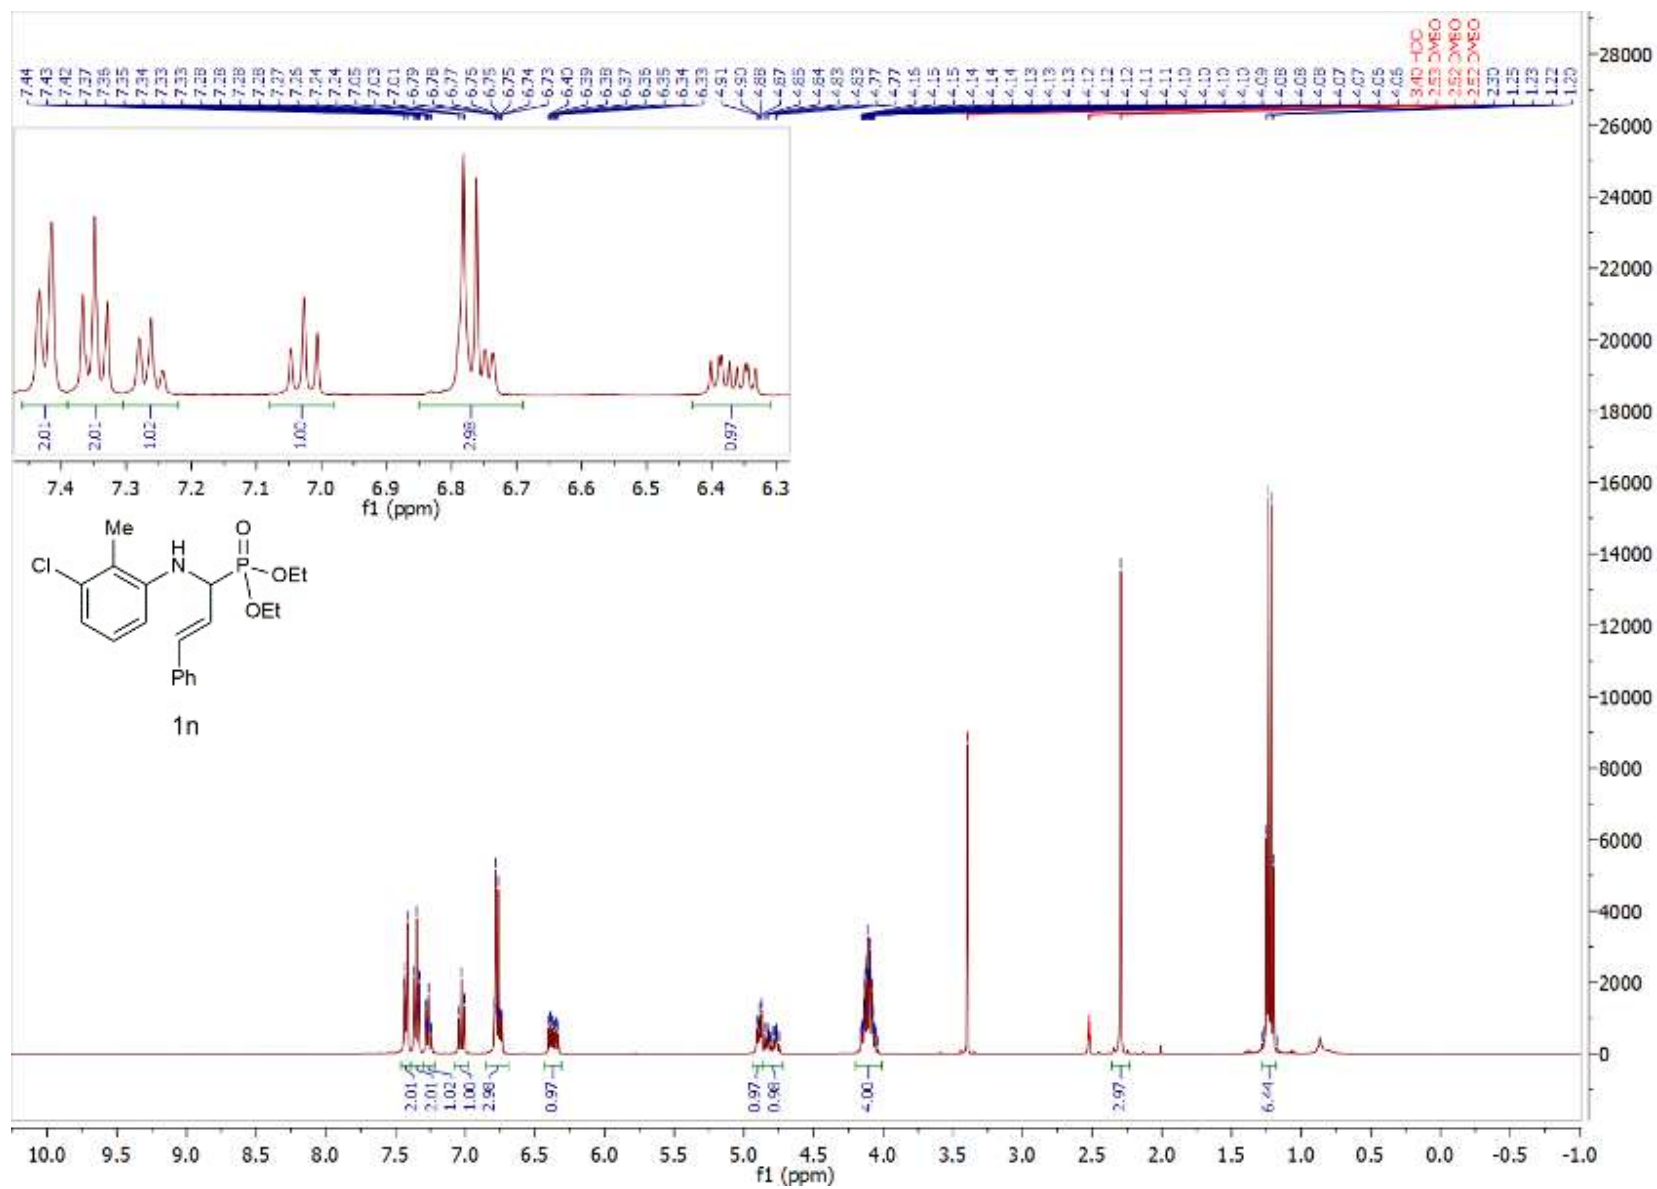

Figure S40: <sup>1</sup>H NMR Spectra of **1n**

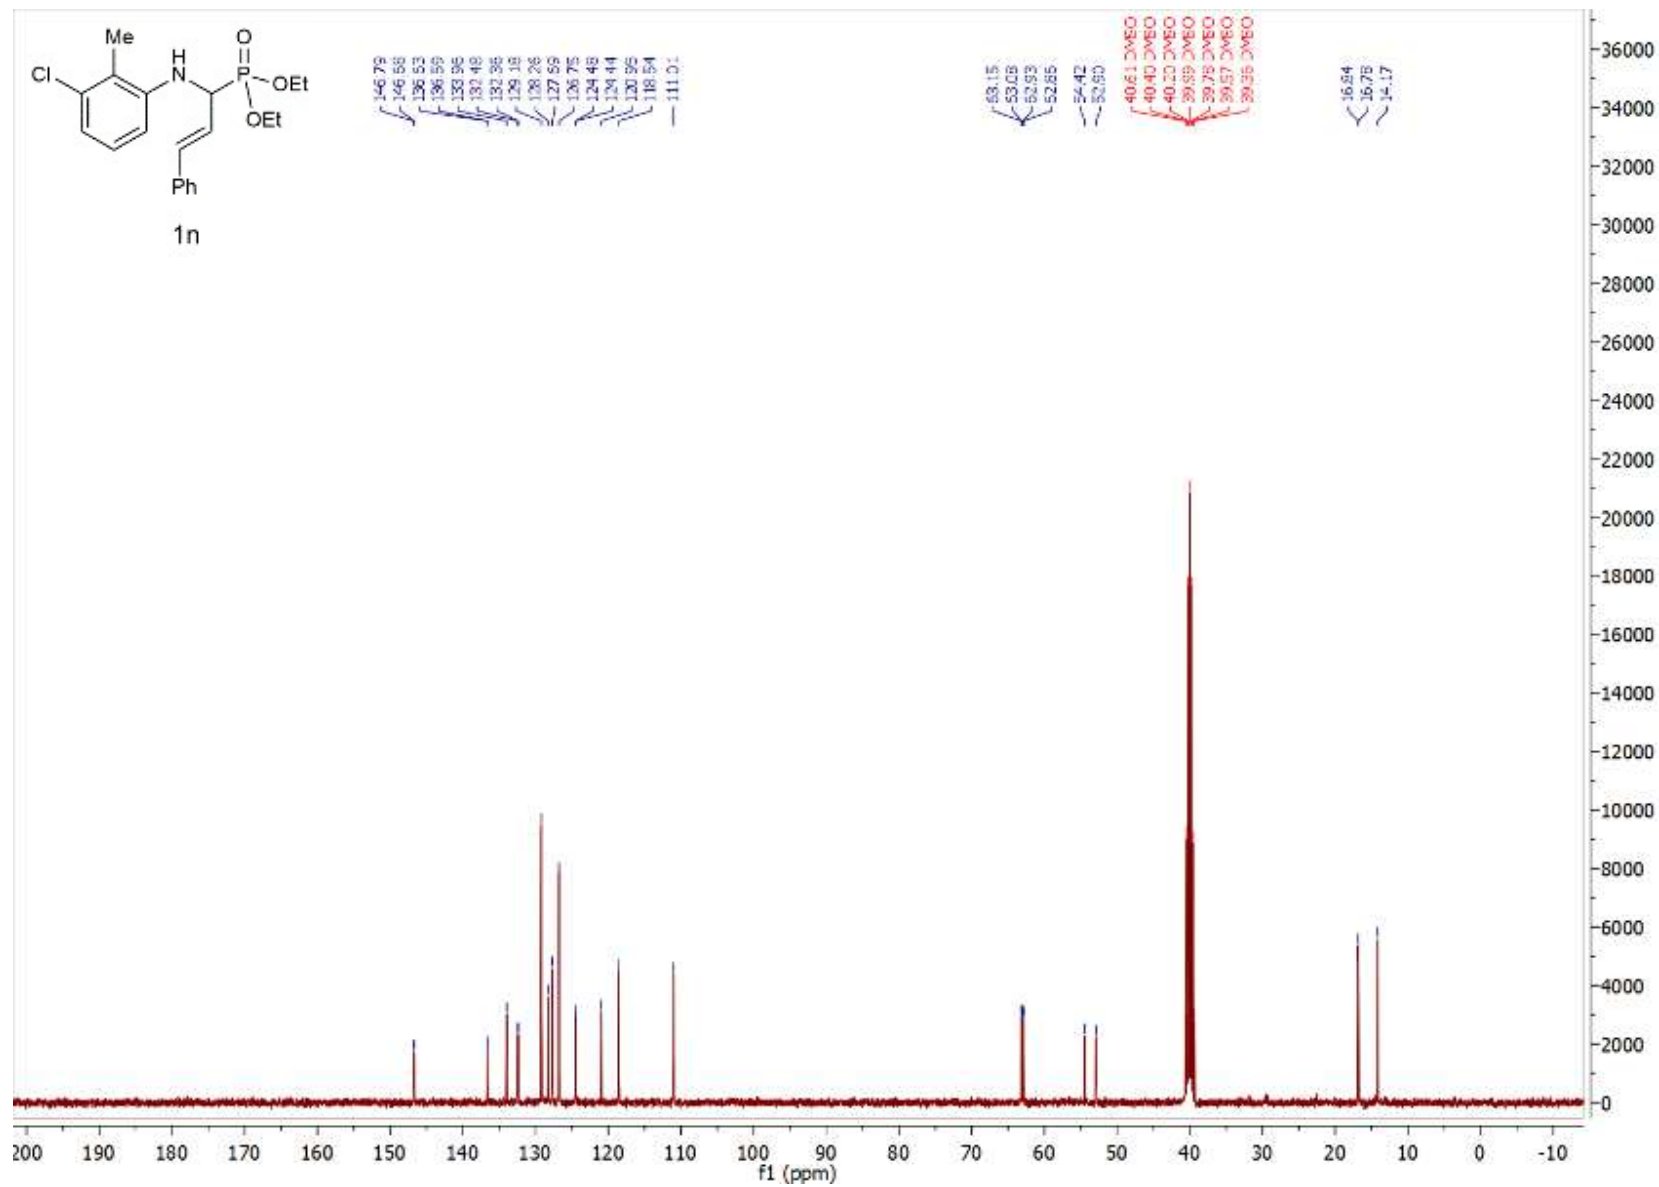

Figure S41:  $^{13}\text{C}$  NMR Spectra of **1n**

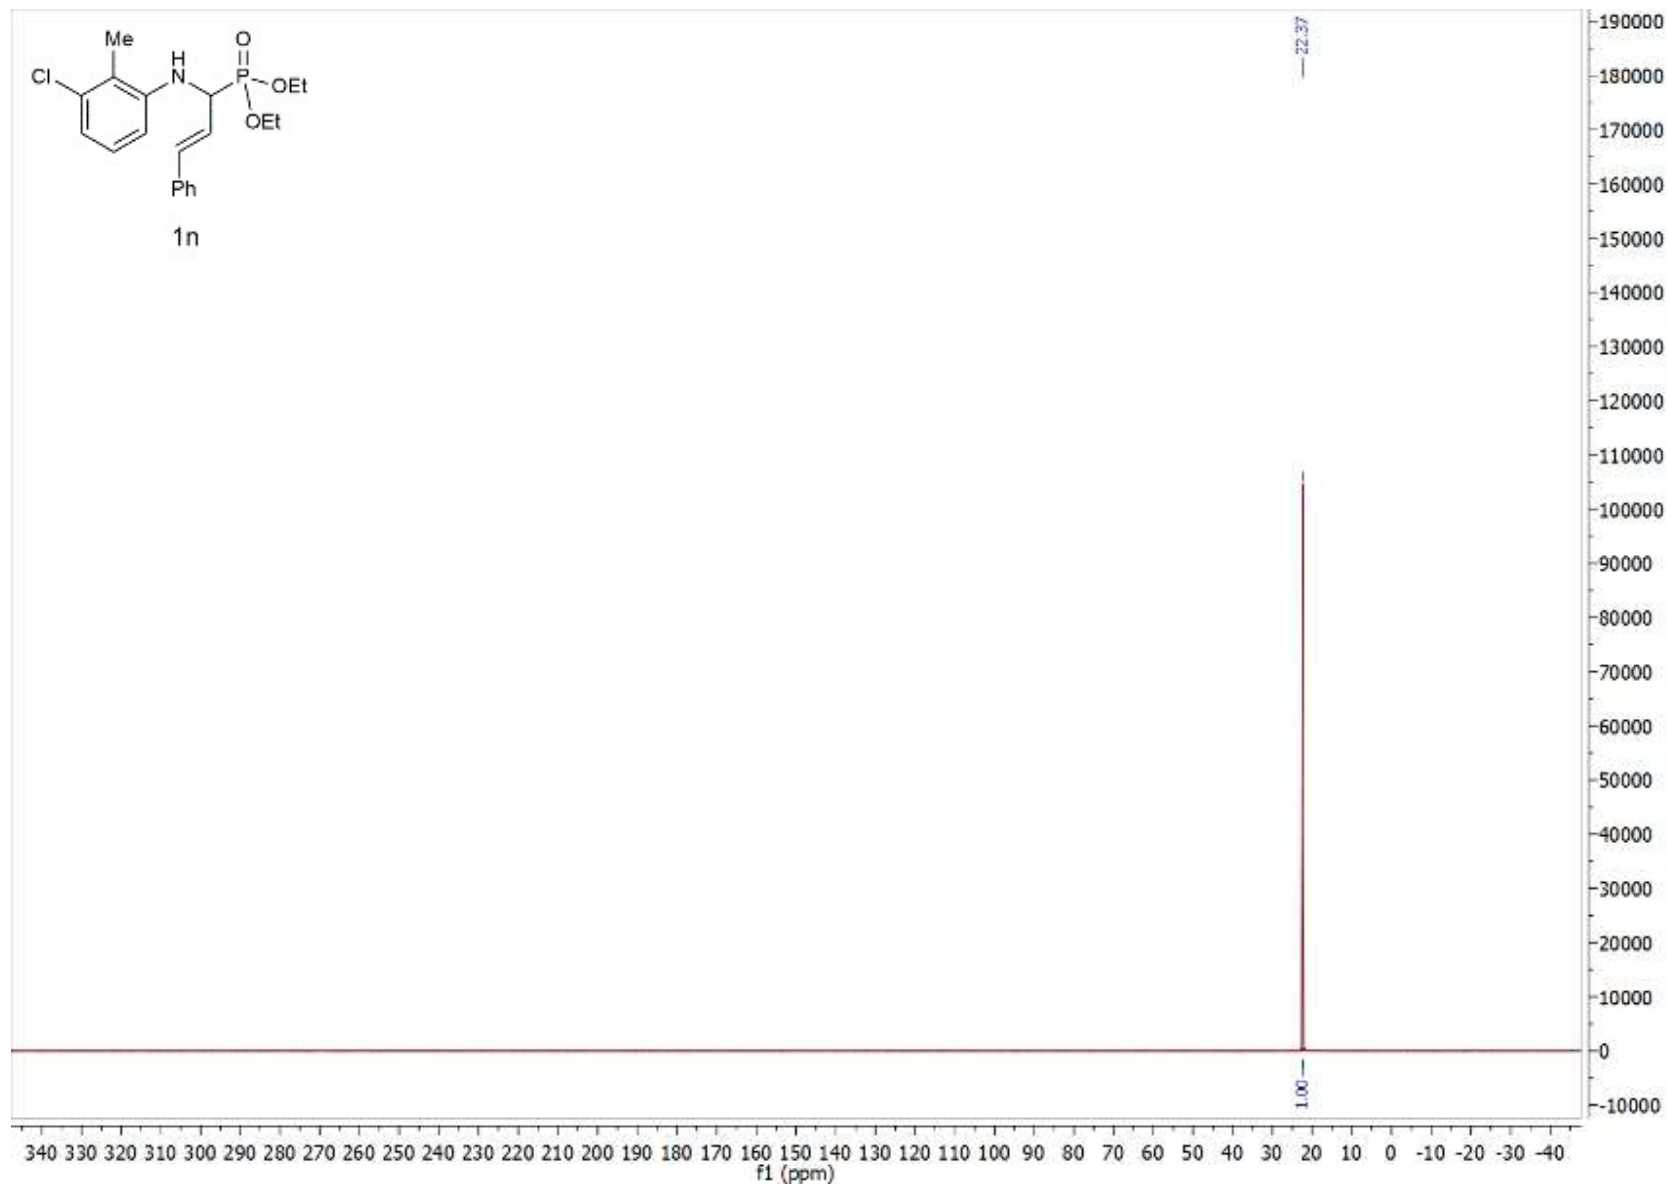

Figure S42:  $^{31}\text{P}$  NMR Spectra of **1n**

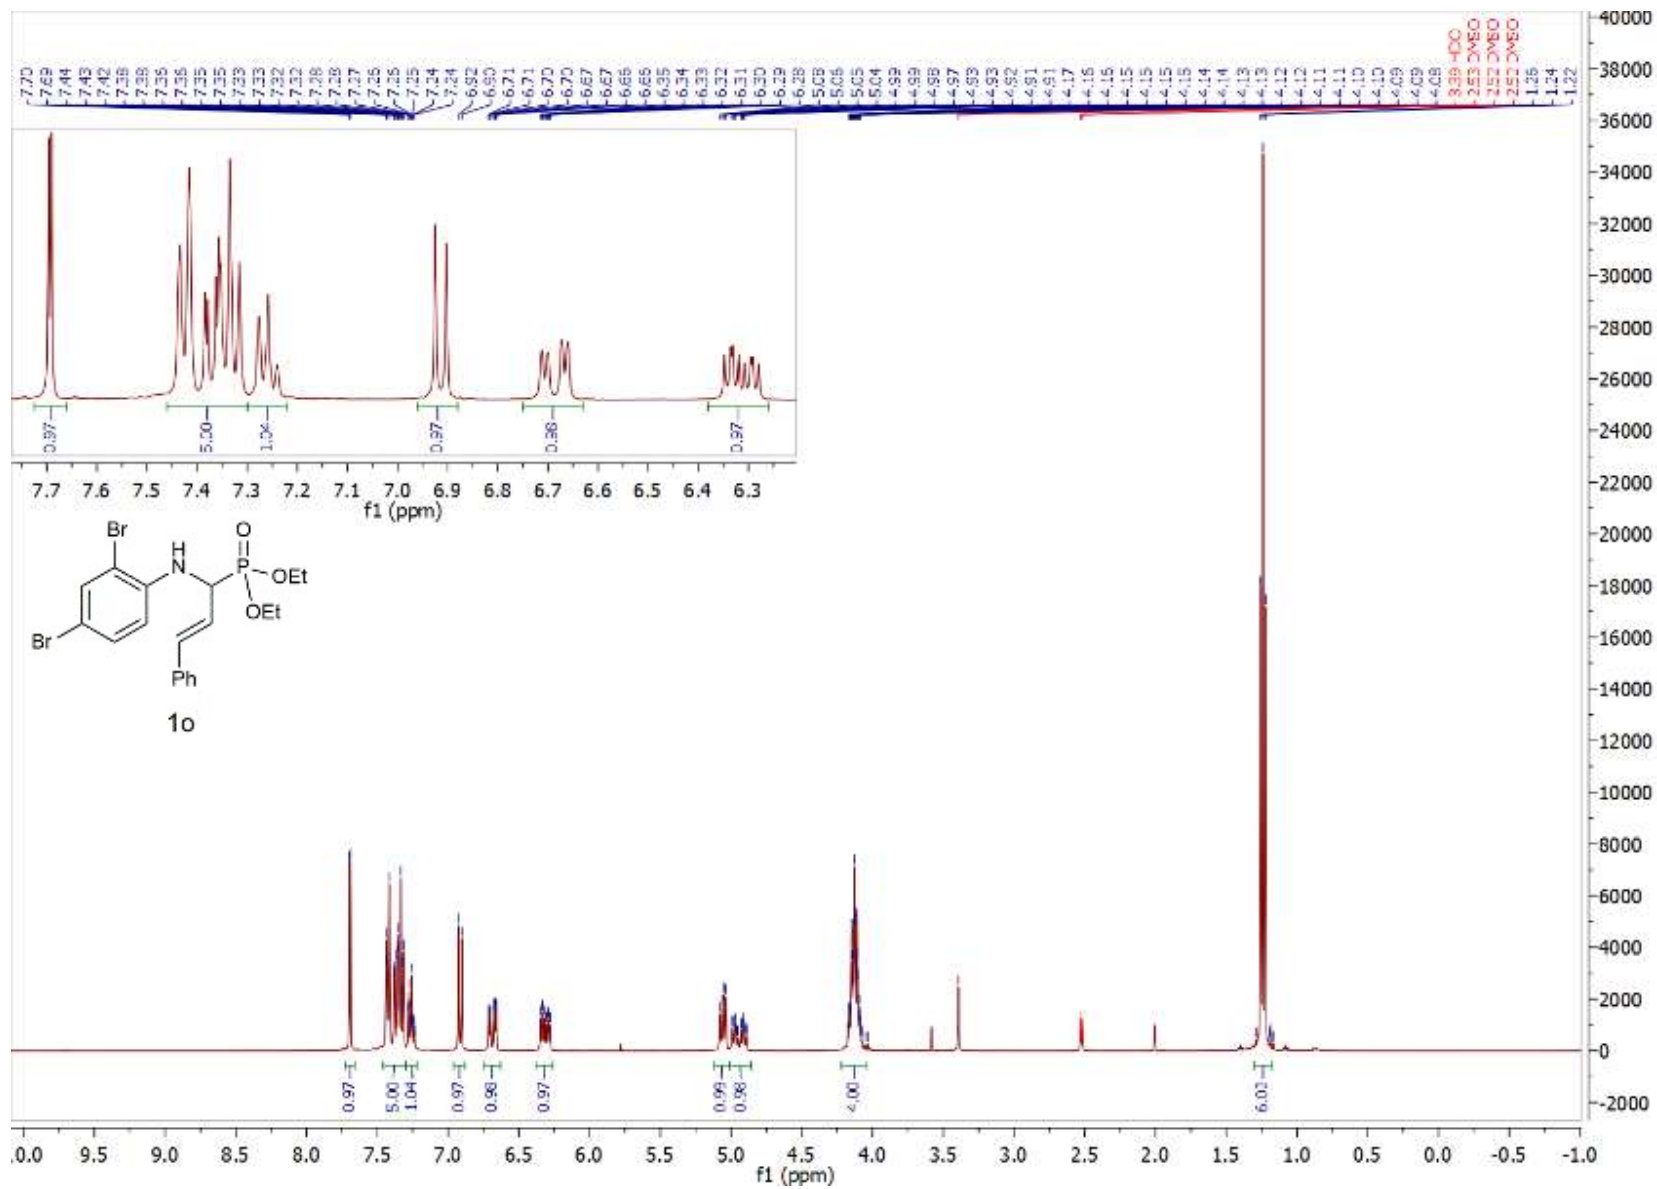

Figure S43: <sup>1</sup>H NMR Spectra of 1o

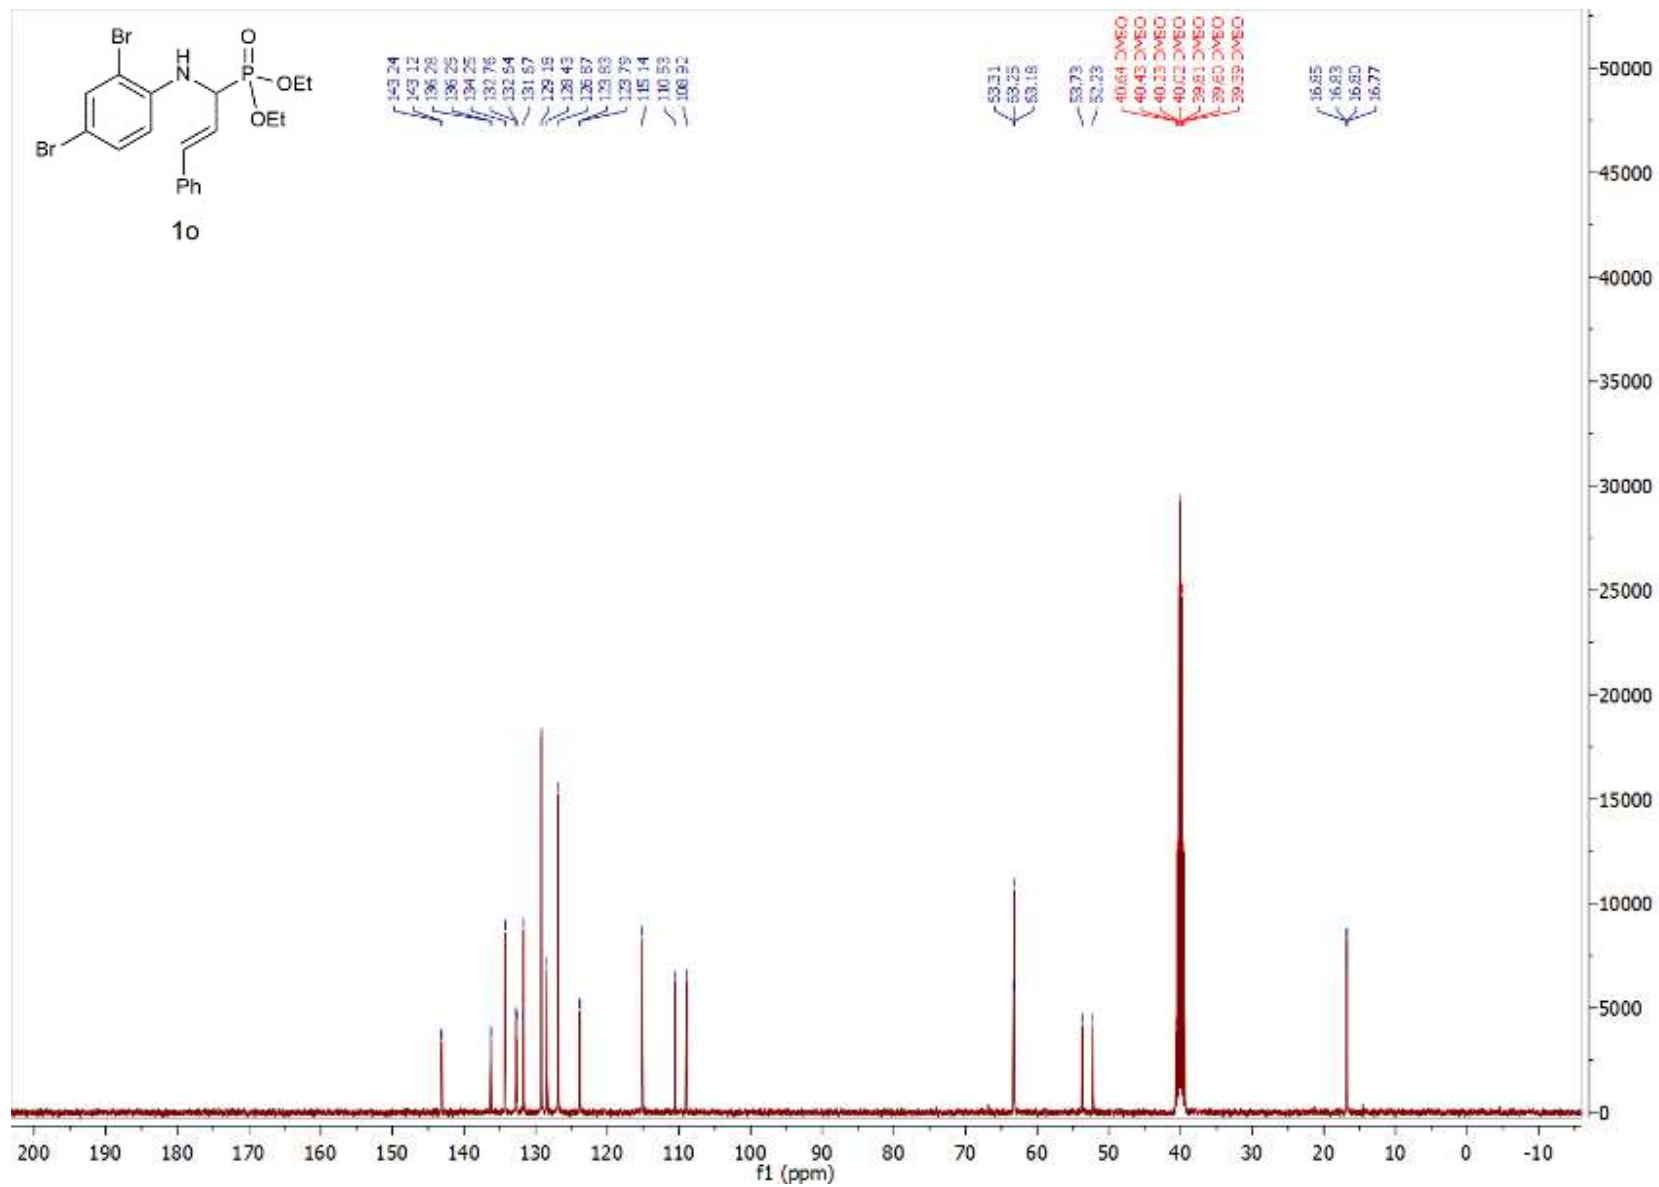

Figure S44: <sup>13</sup>C NMR Spectra of **1o**

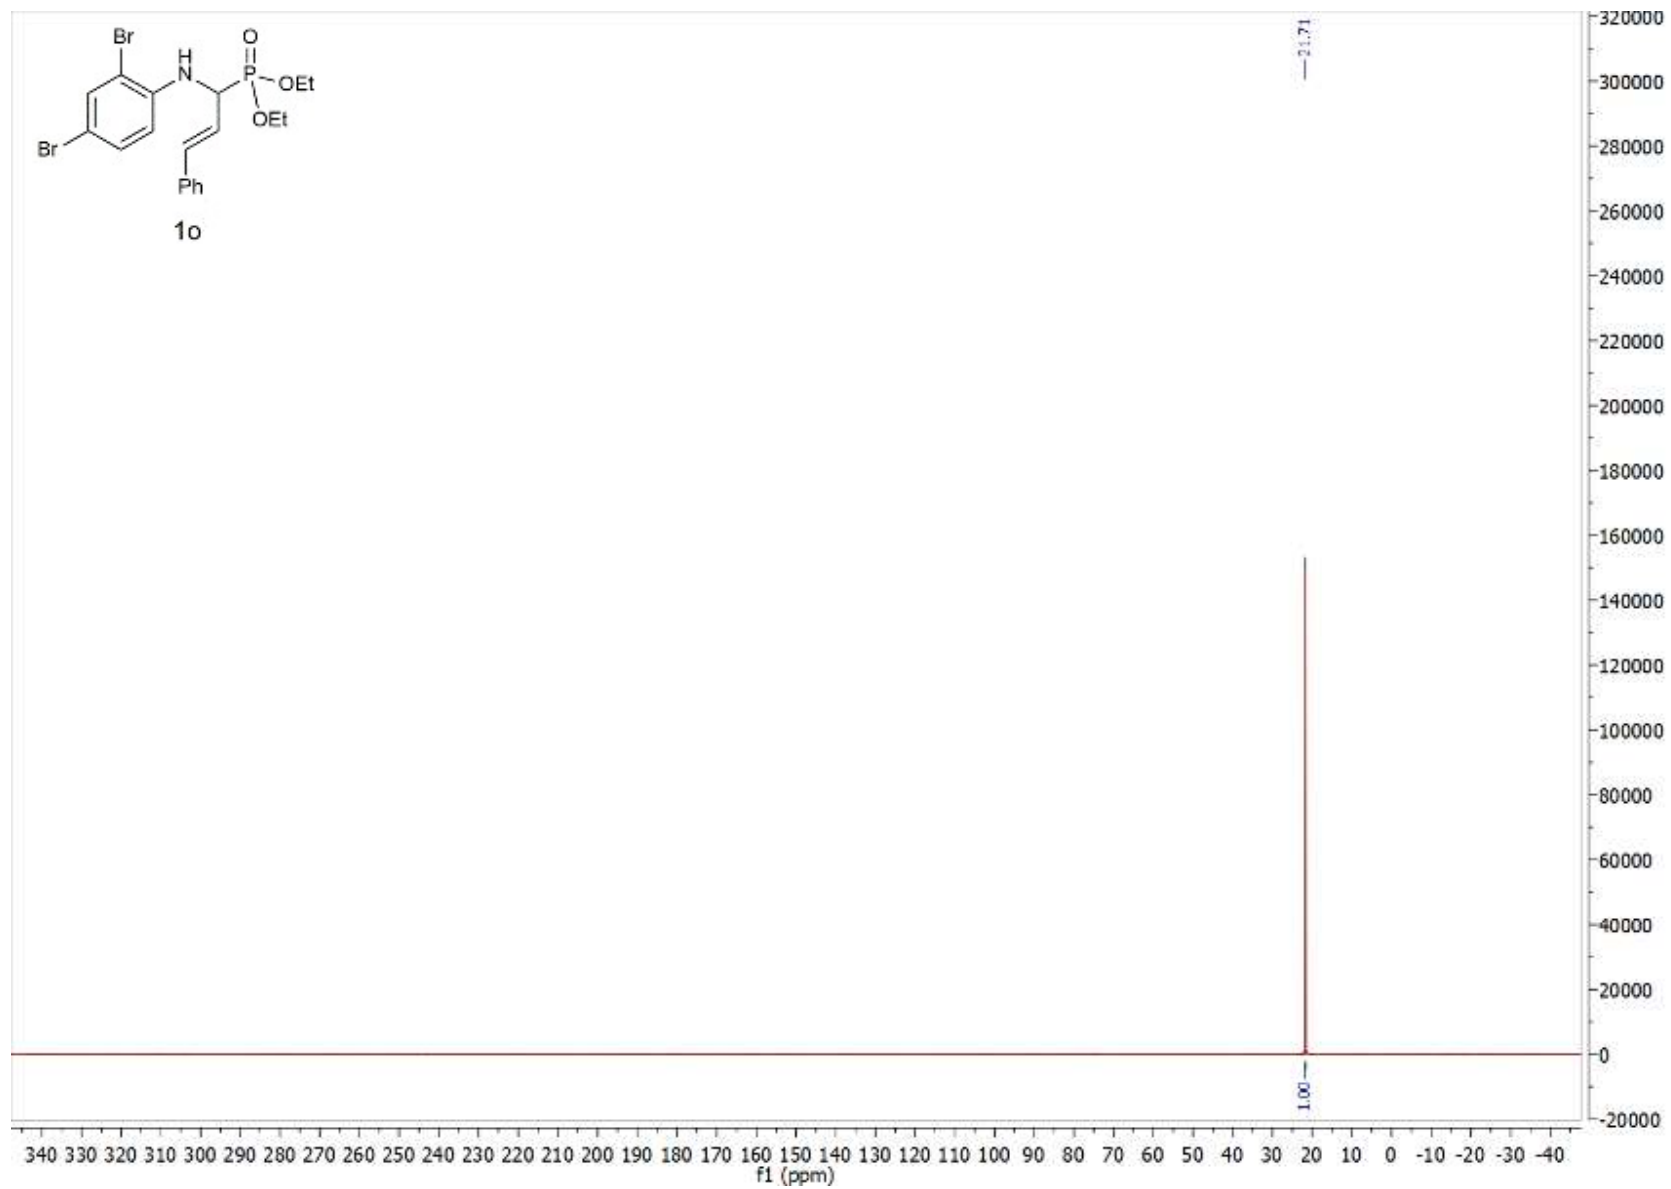

Figure S45:  $^{31}\text{P}$  NMR Spectra of **1o**

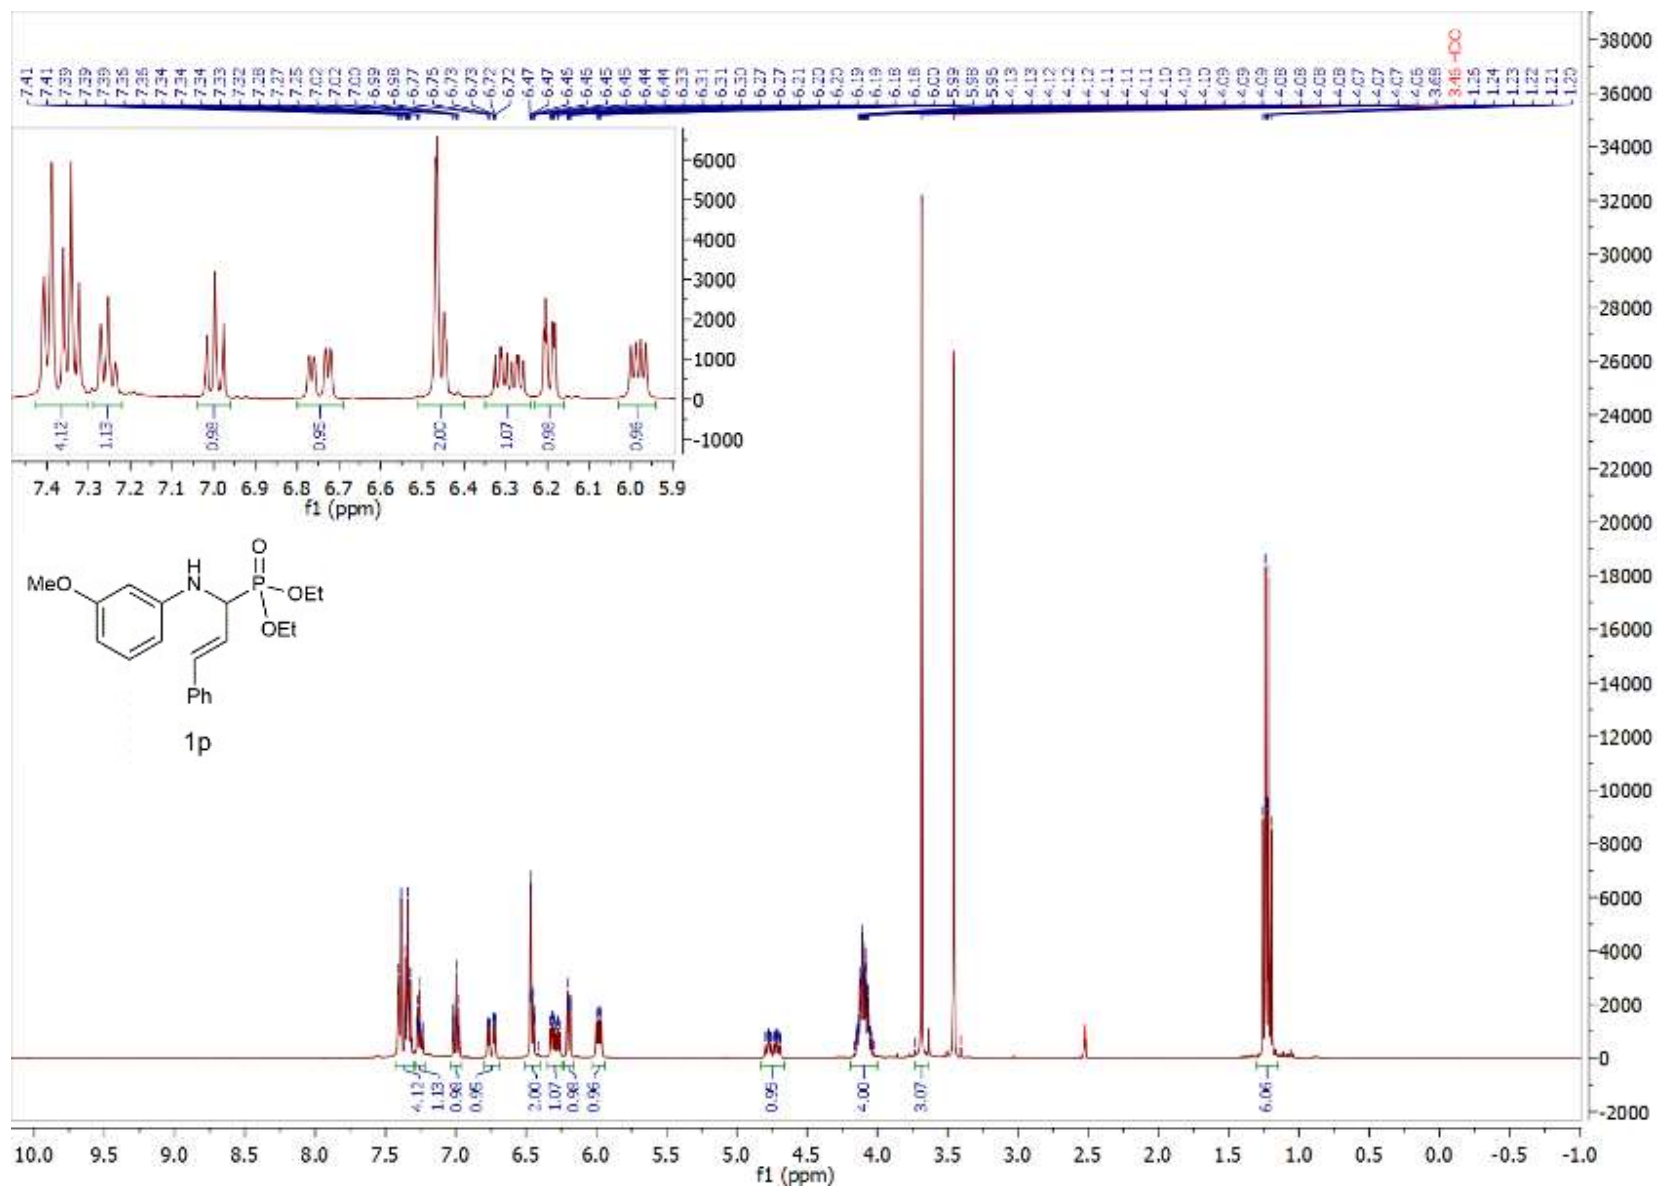

Figure S46: <sup>1</sup>H NMR Spectra of 1p

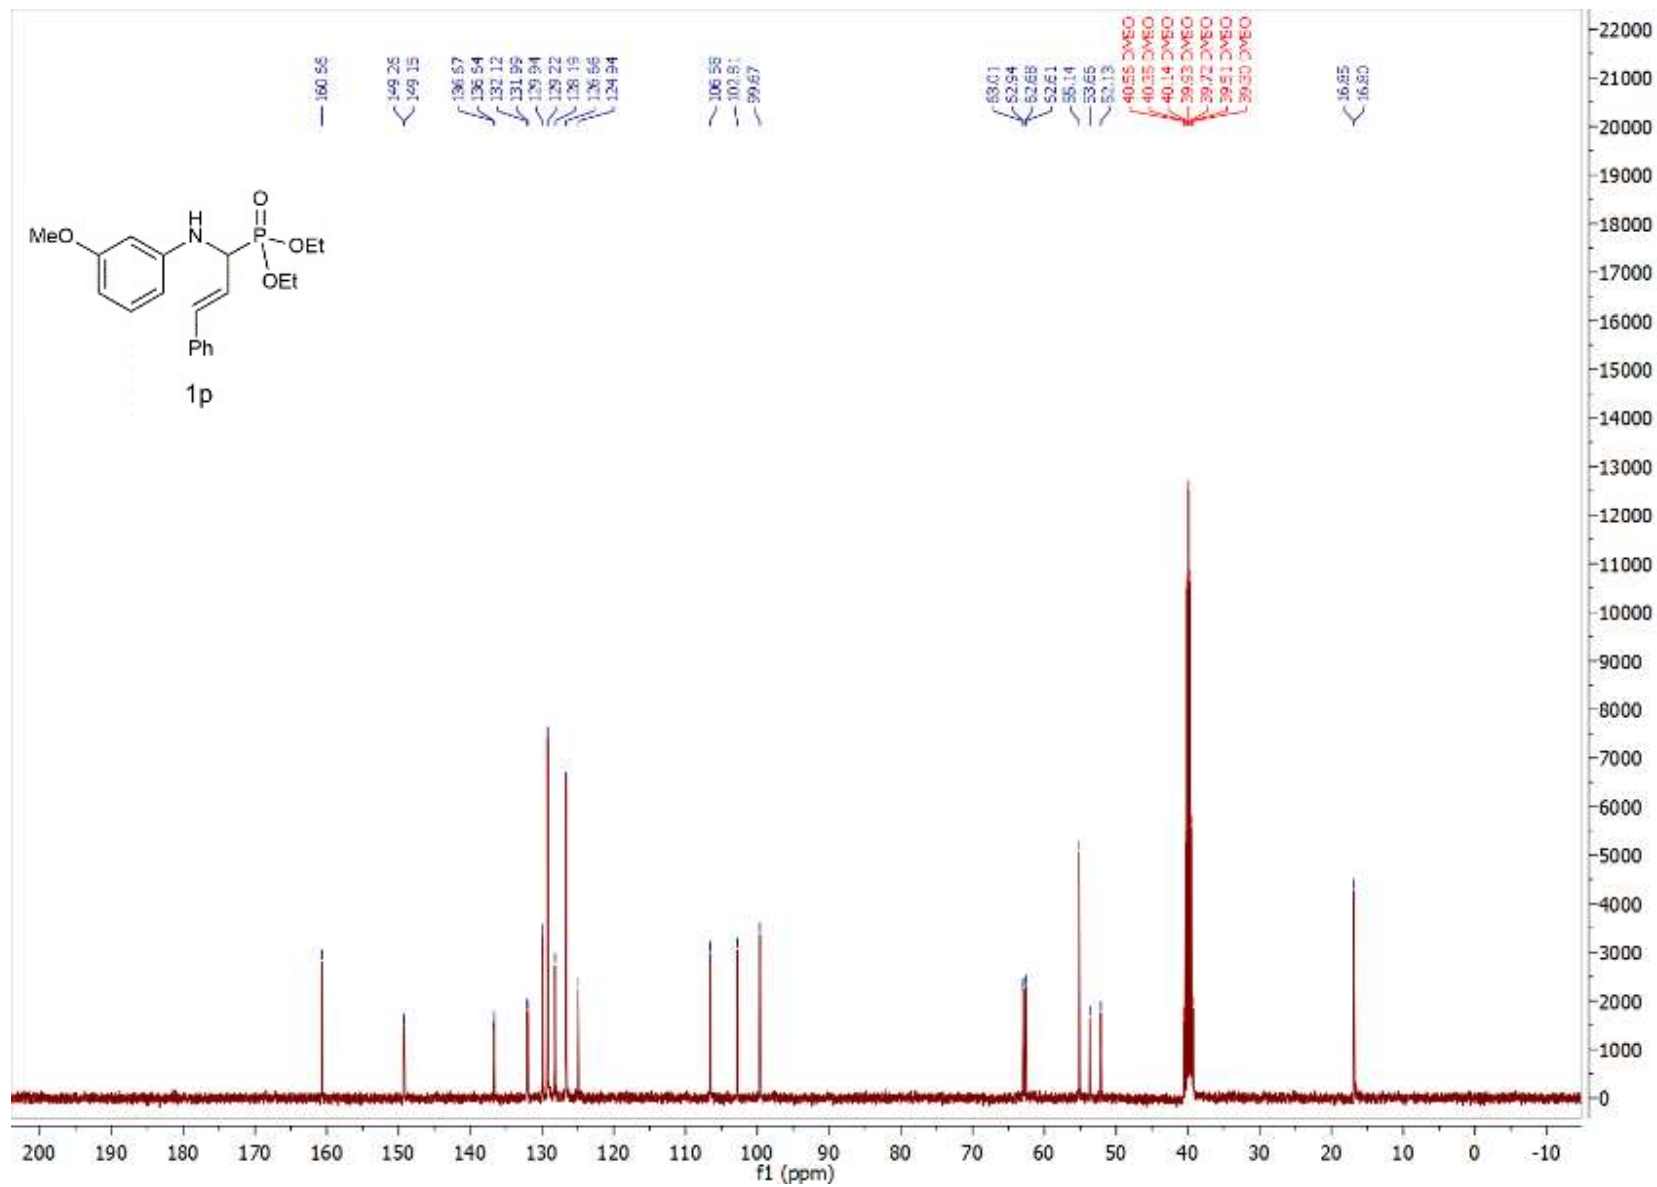

Figure S47: <sup>13</sup>C NMR Spectra of 1p



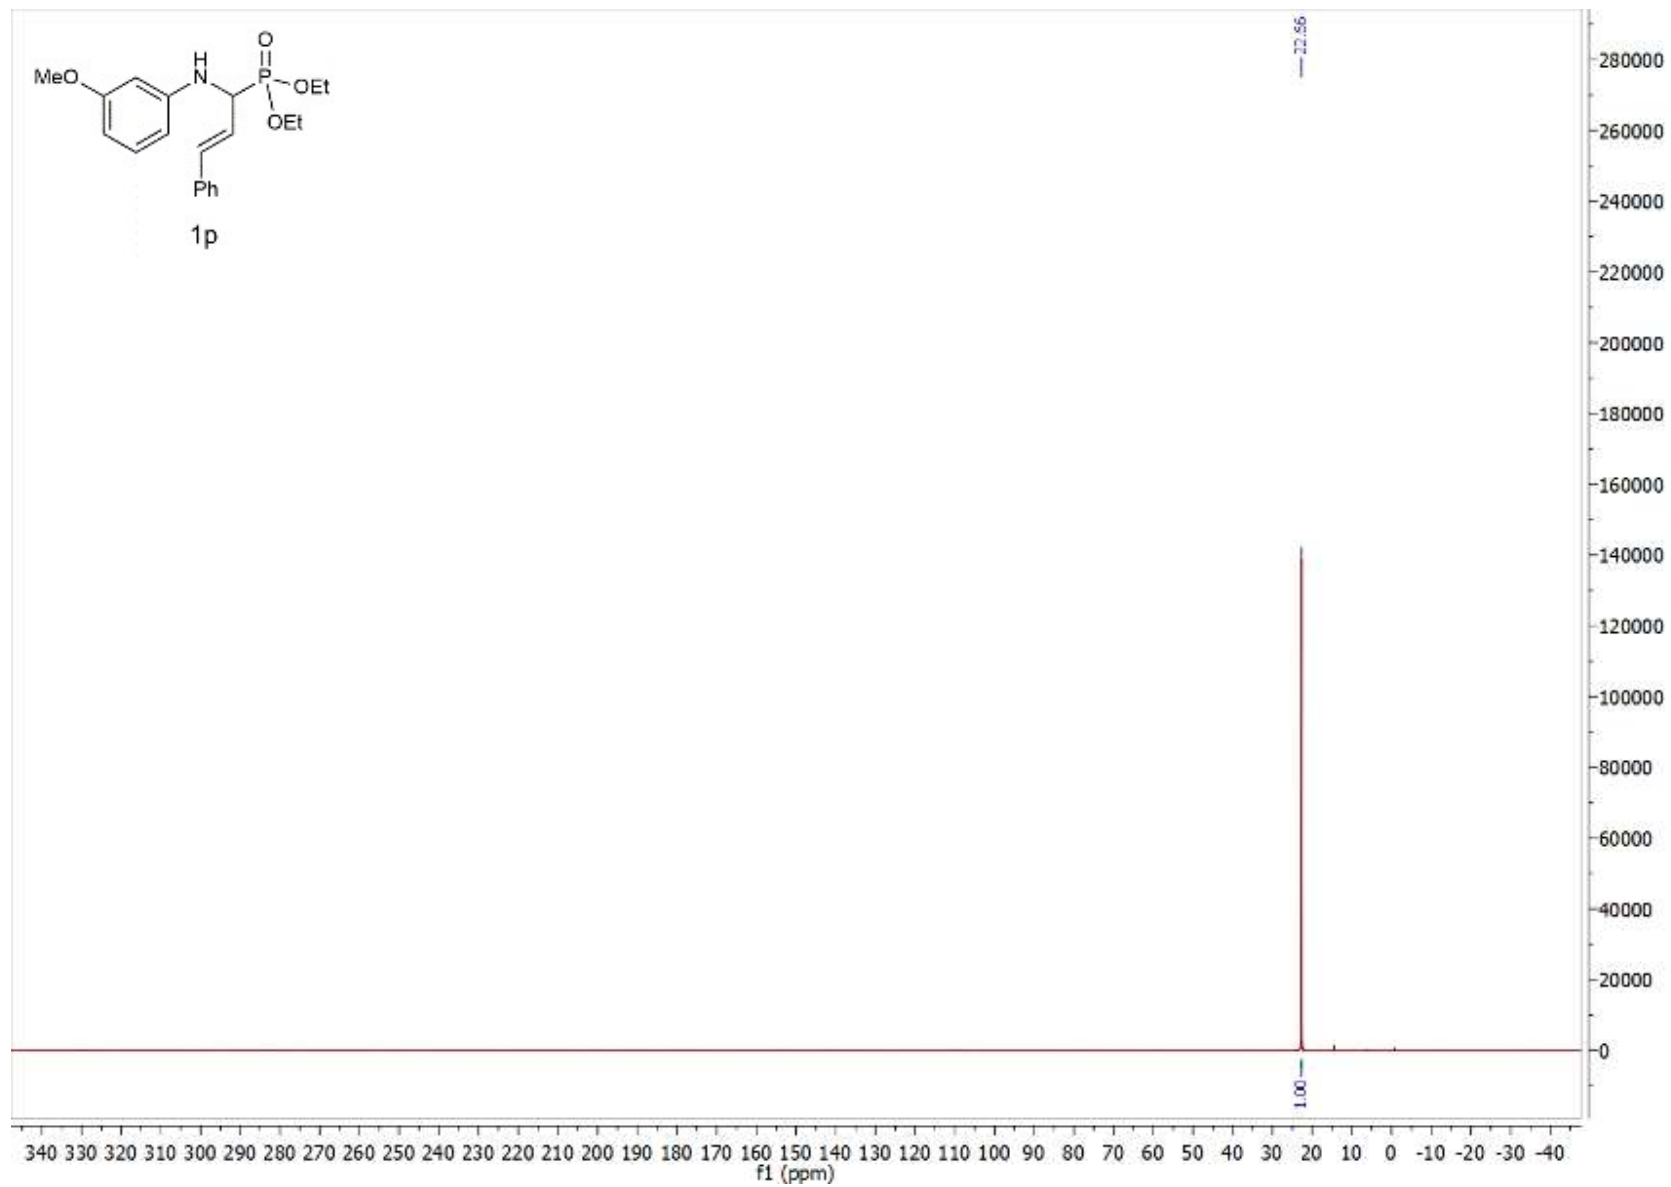

Figure S48:  $^{31}\text{P}$  NMR Spectra of 1p



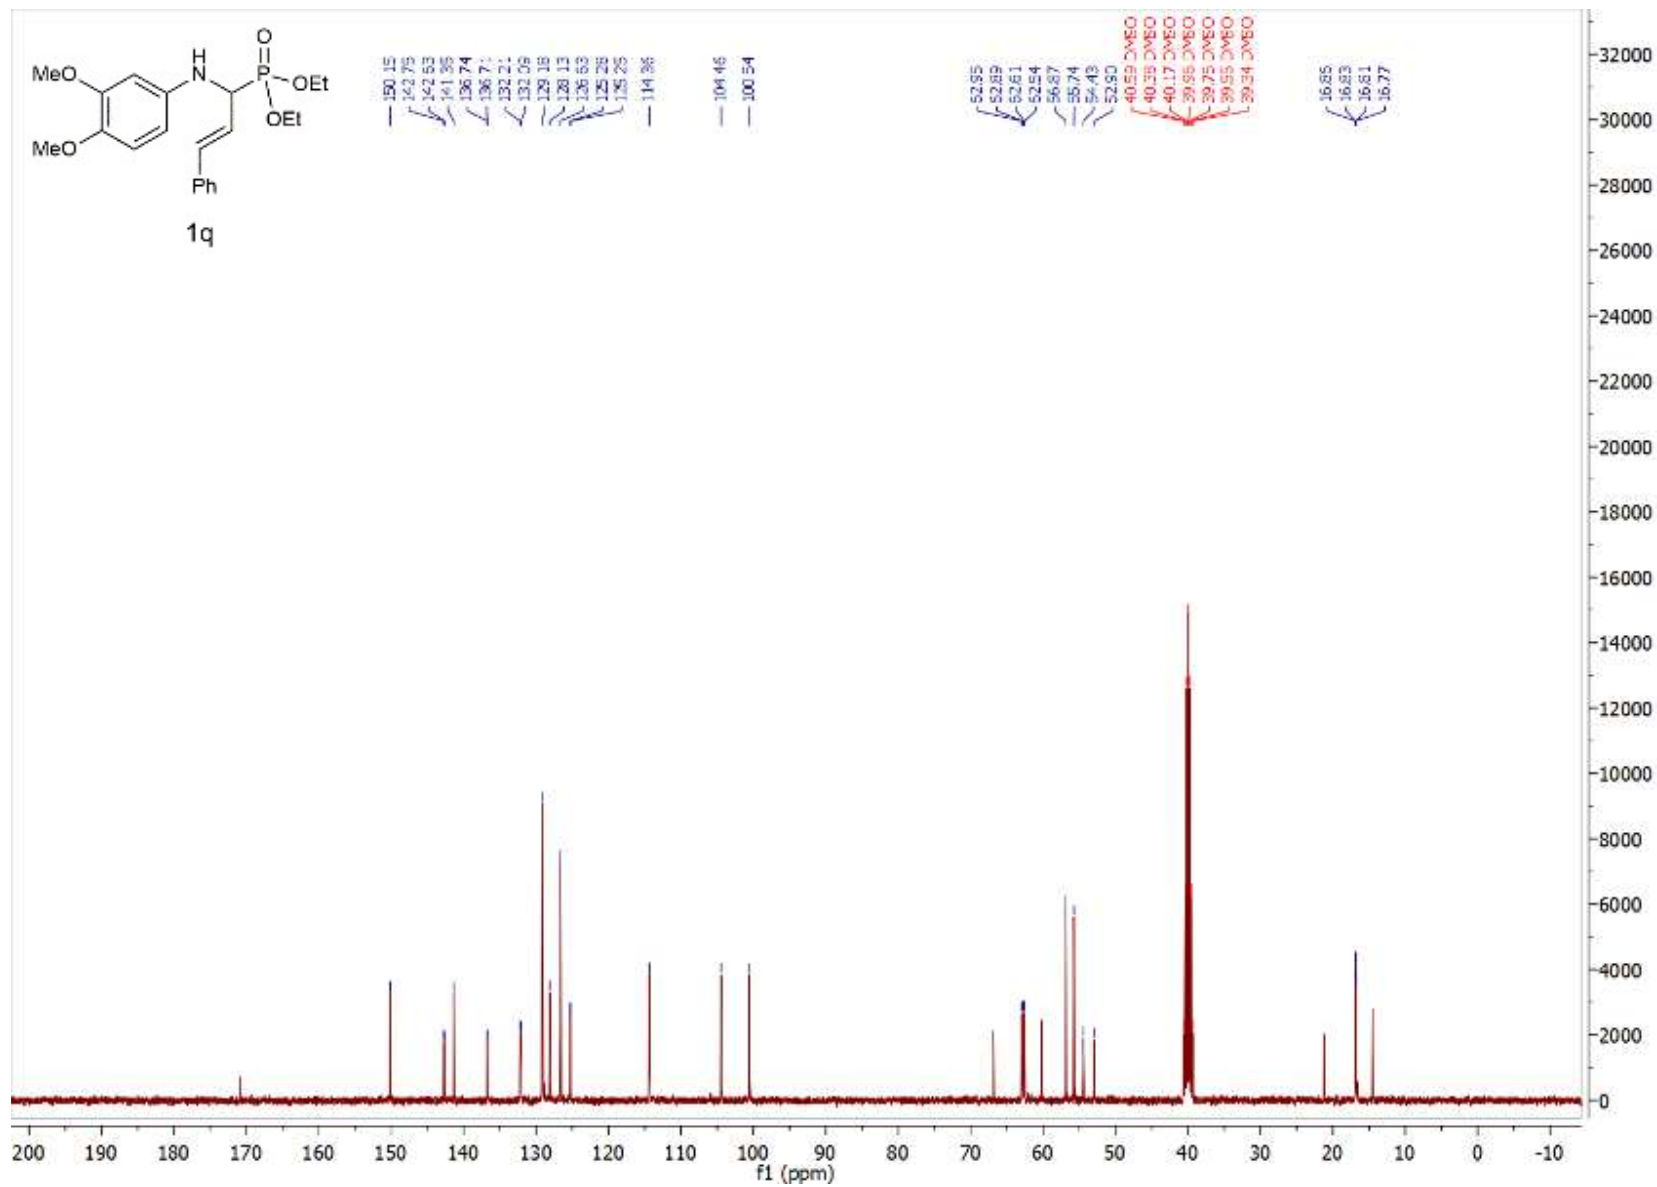

Figure S50: <sup>13</sup>C NMR Spectra of q

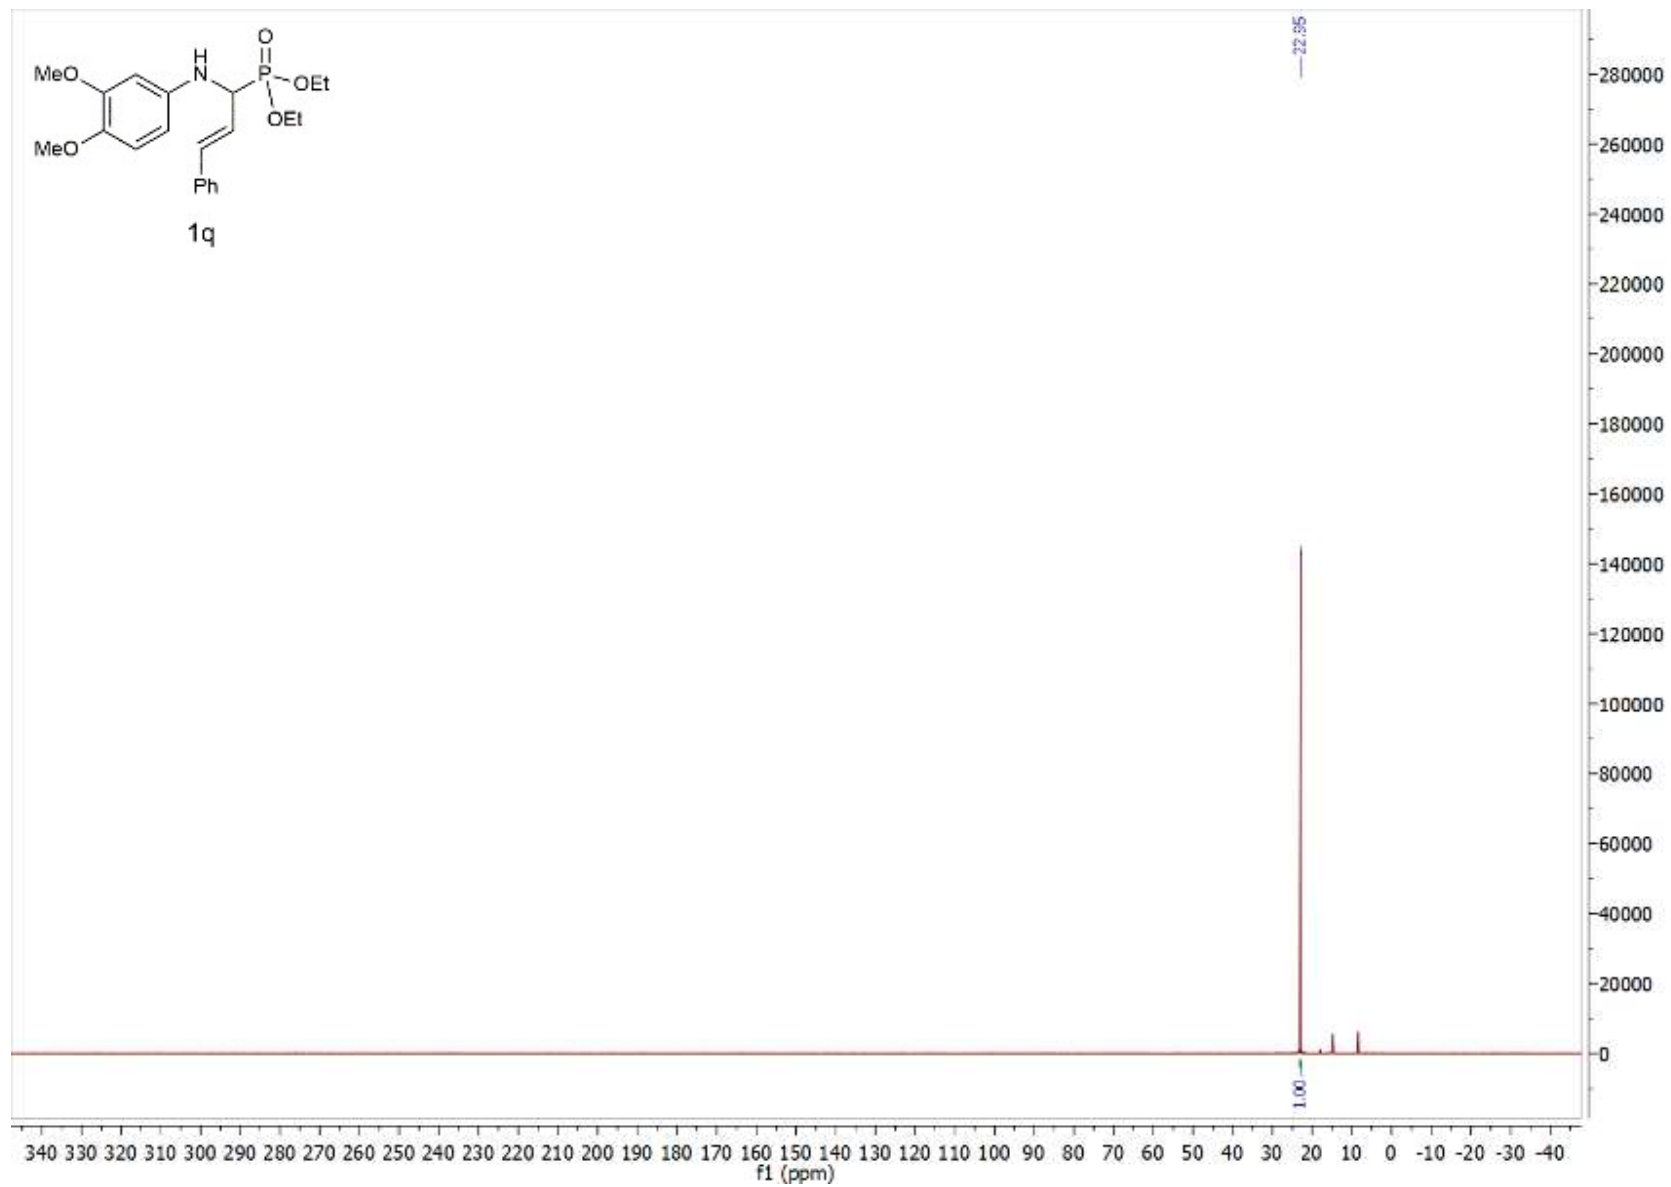

Figure S51:  $^{31}\text{P}$  NMR Spectra of 1q



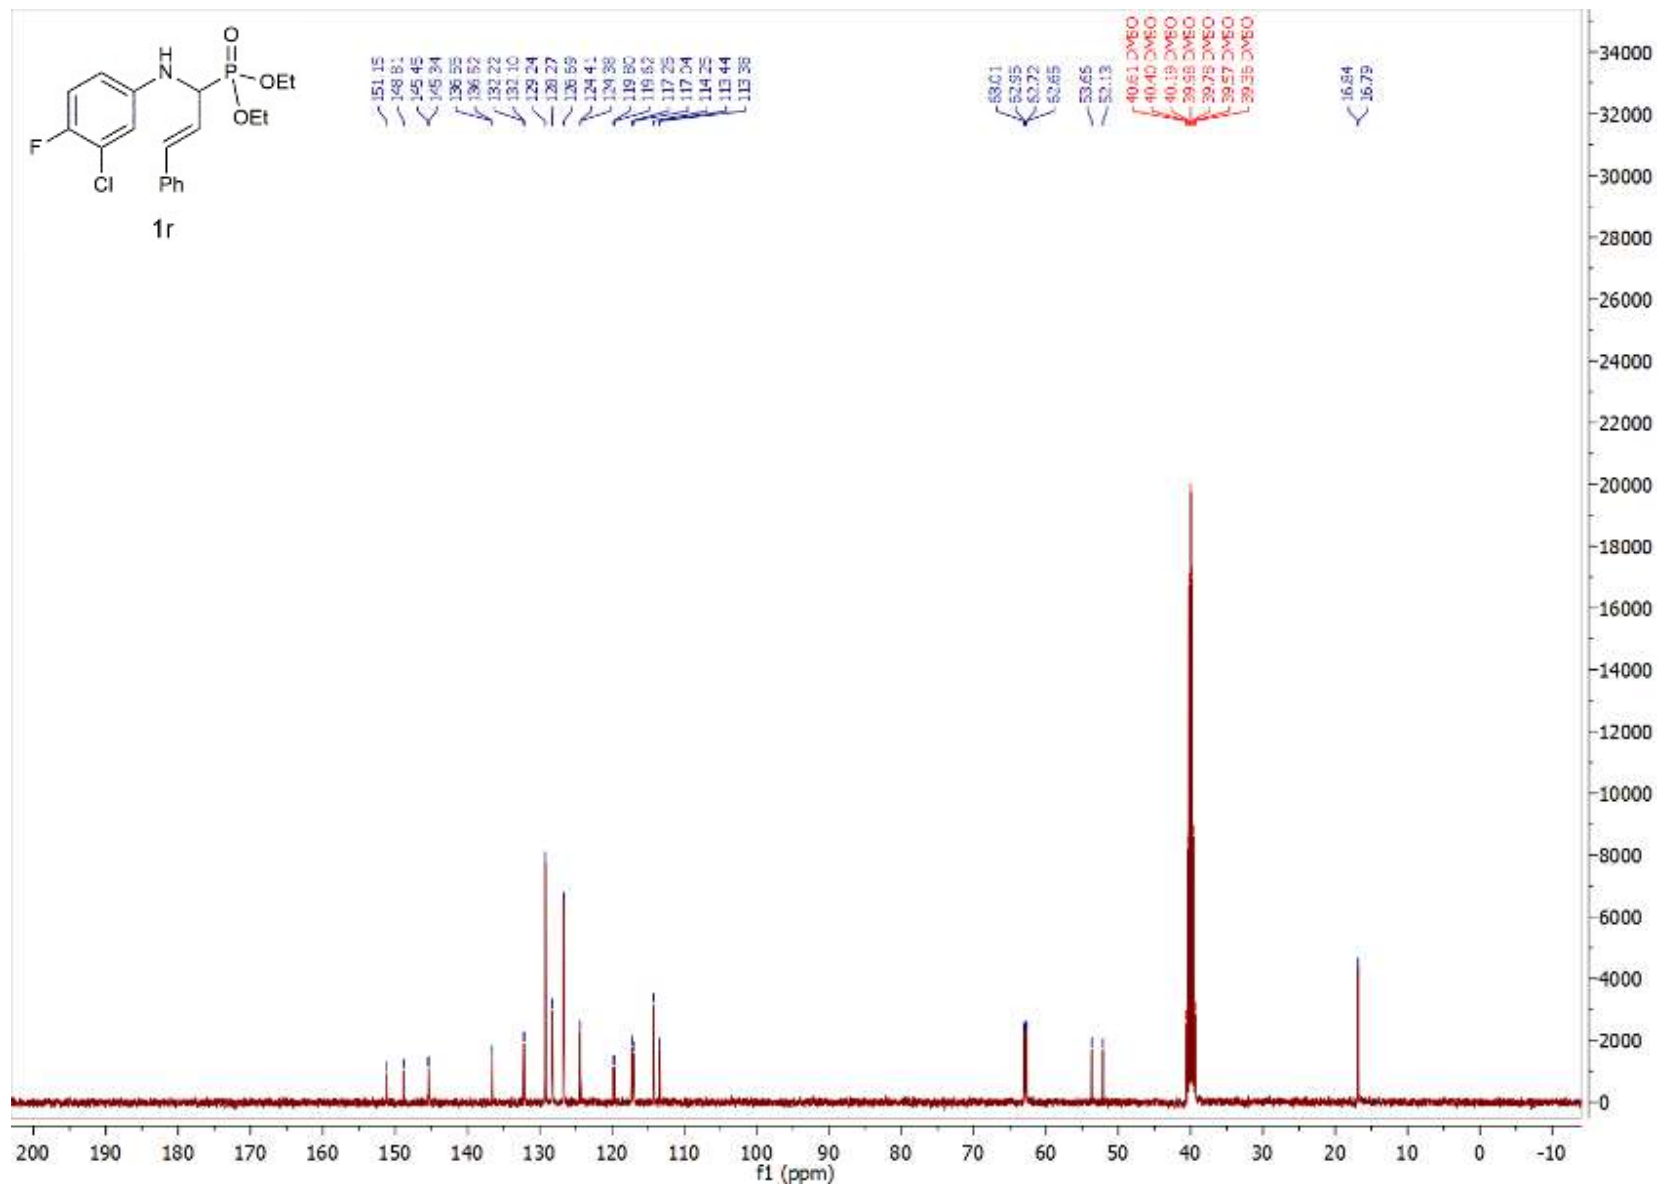

Figure S53:  $^{13}\text{C}$  NMR Spectra of 1r

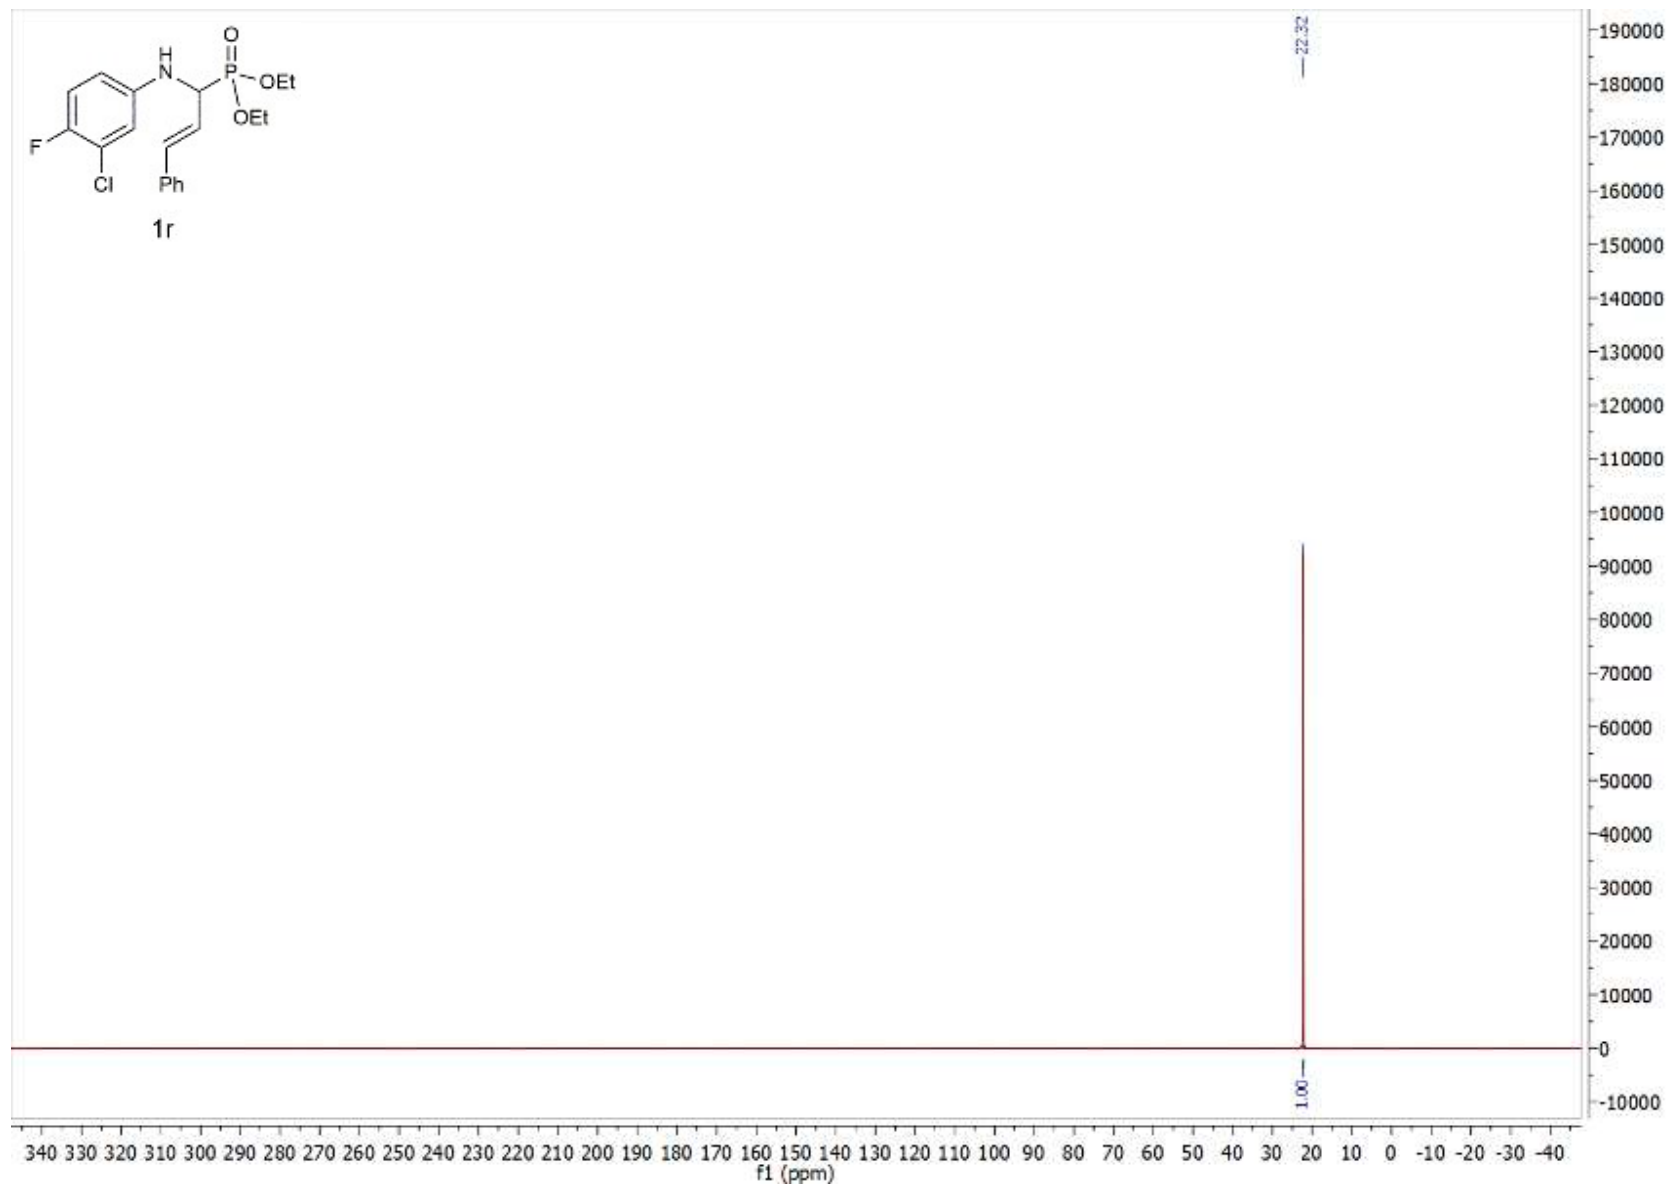

Figure S54:  $^{31}\text{P}$  NMR Spectra of **1r**

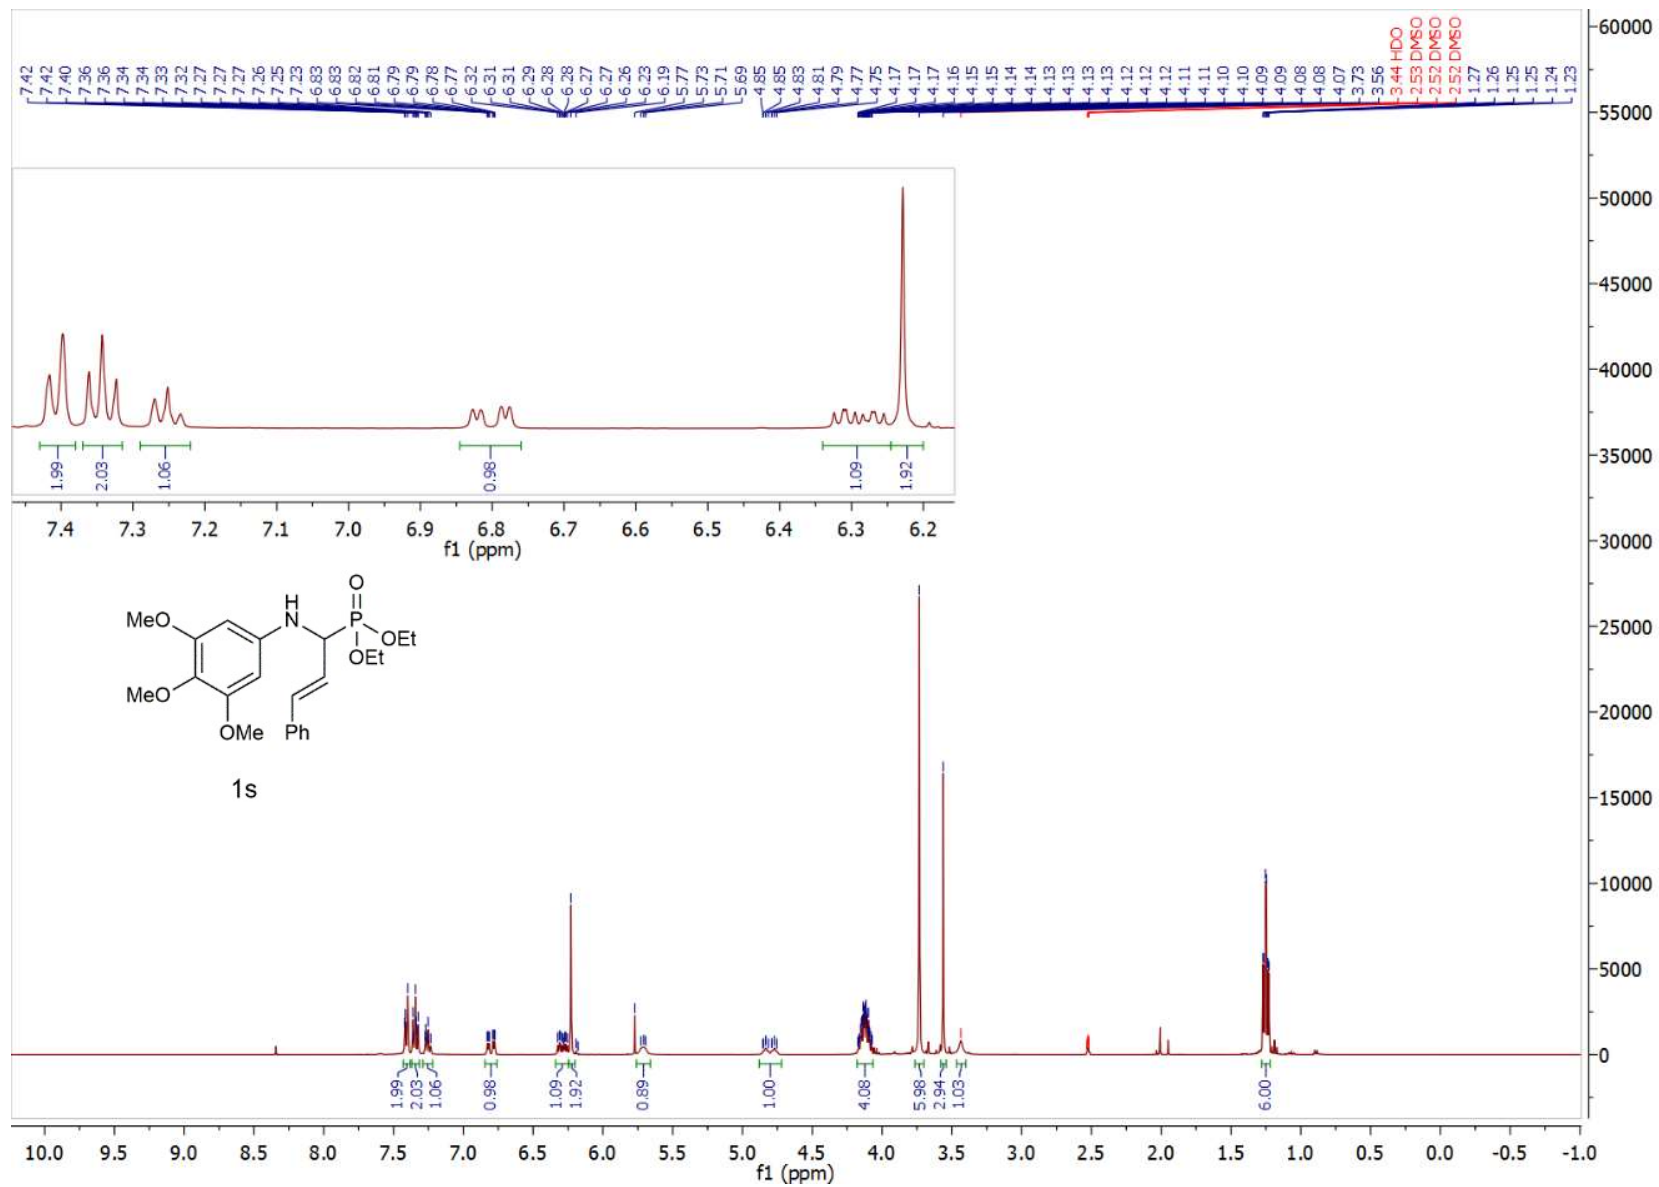

Figure S55: <sup>1</sup>H NMR Spectra of 1s



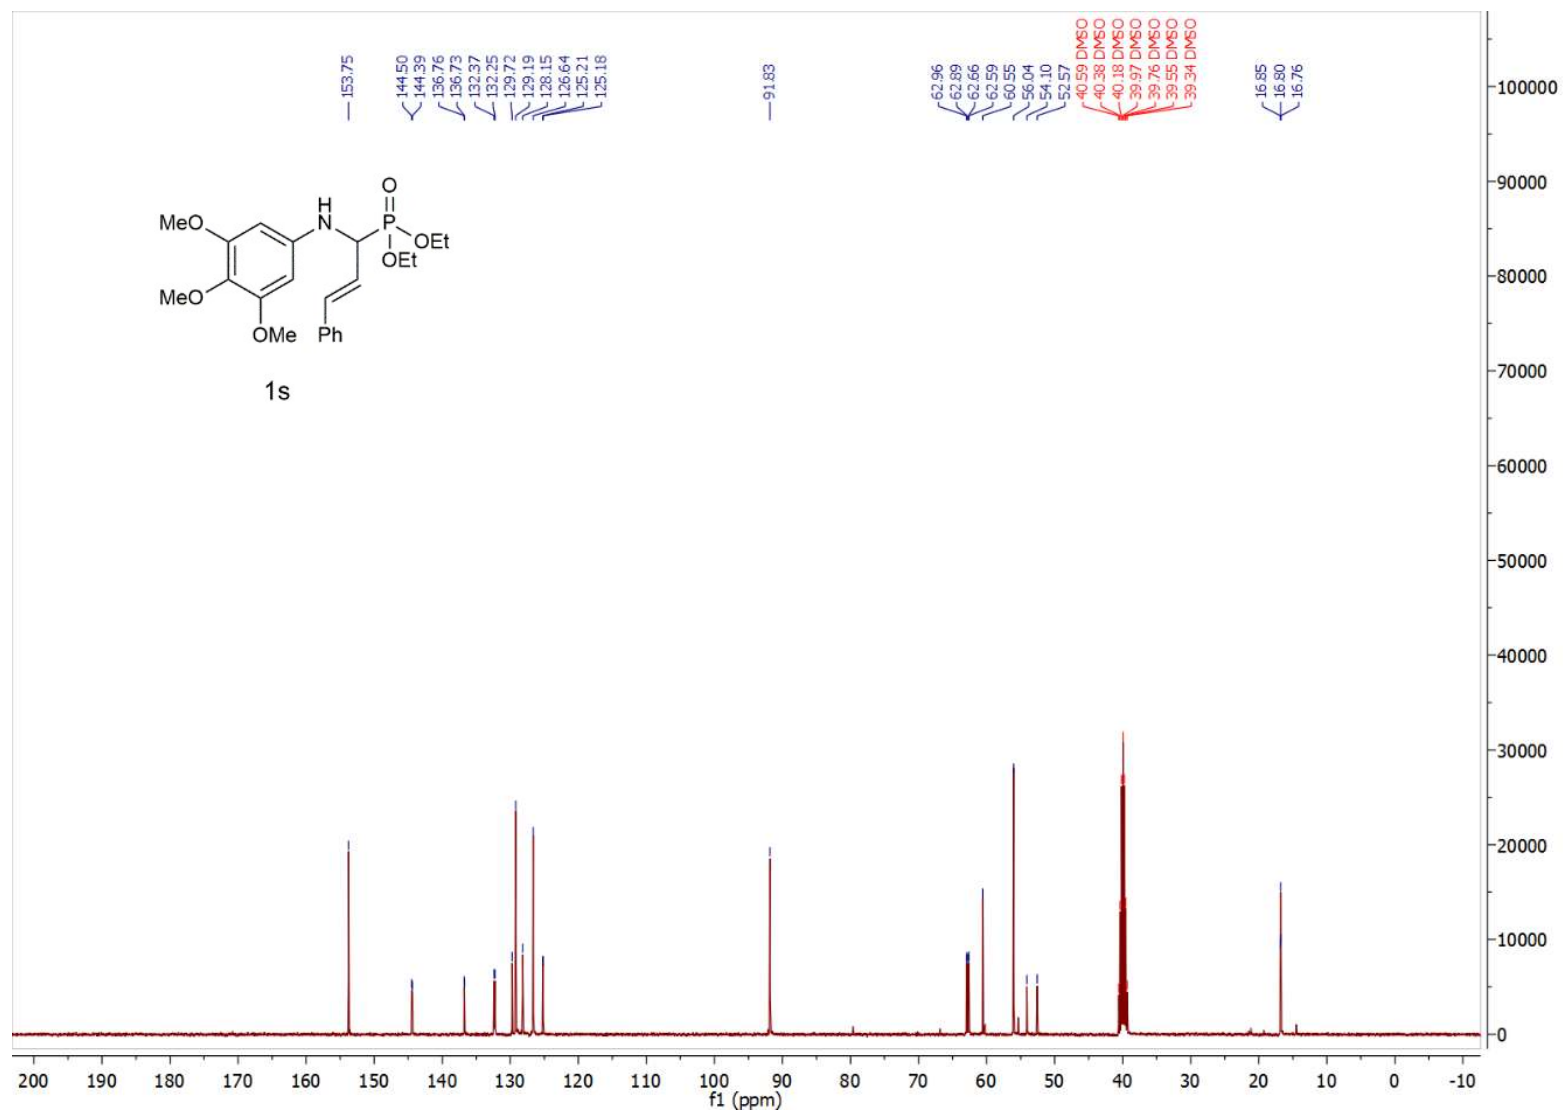

Figure S56:  $^{13}\text{C}$  NMR Spectra of 1s

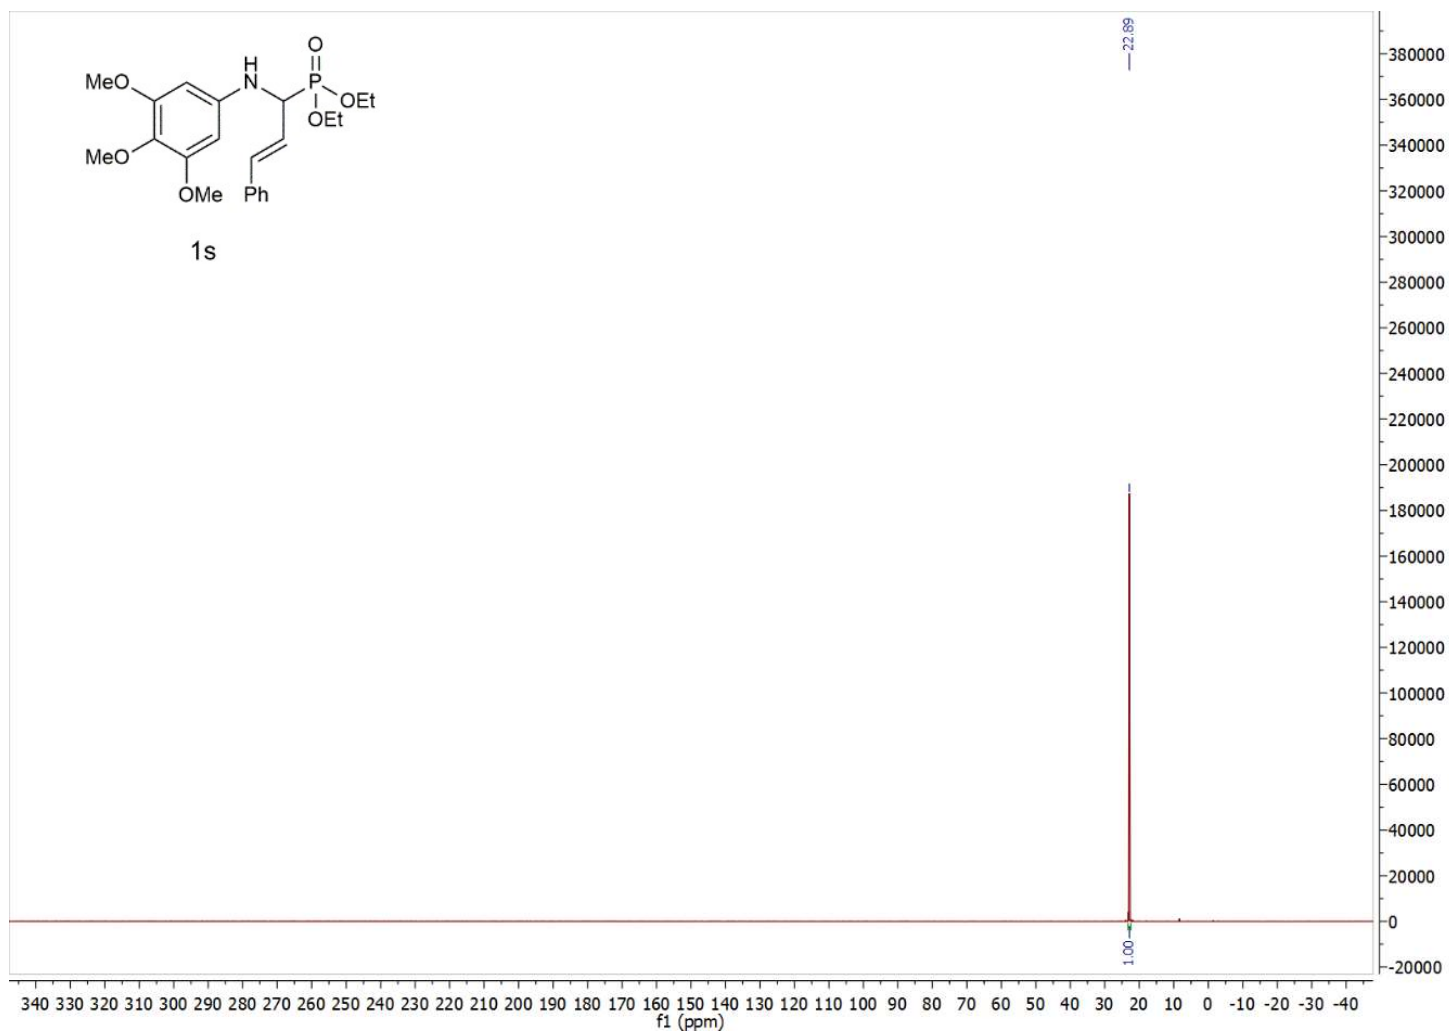

Figure S57:  $^{31}\text{P}$  NMR Spectra of **1s**



Figure S58:  $^1\text{H}$  NMR Spectra of 1t

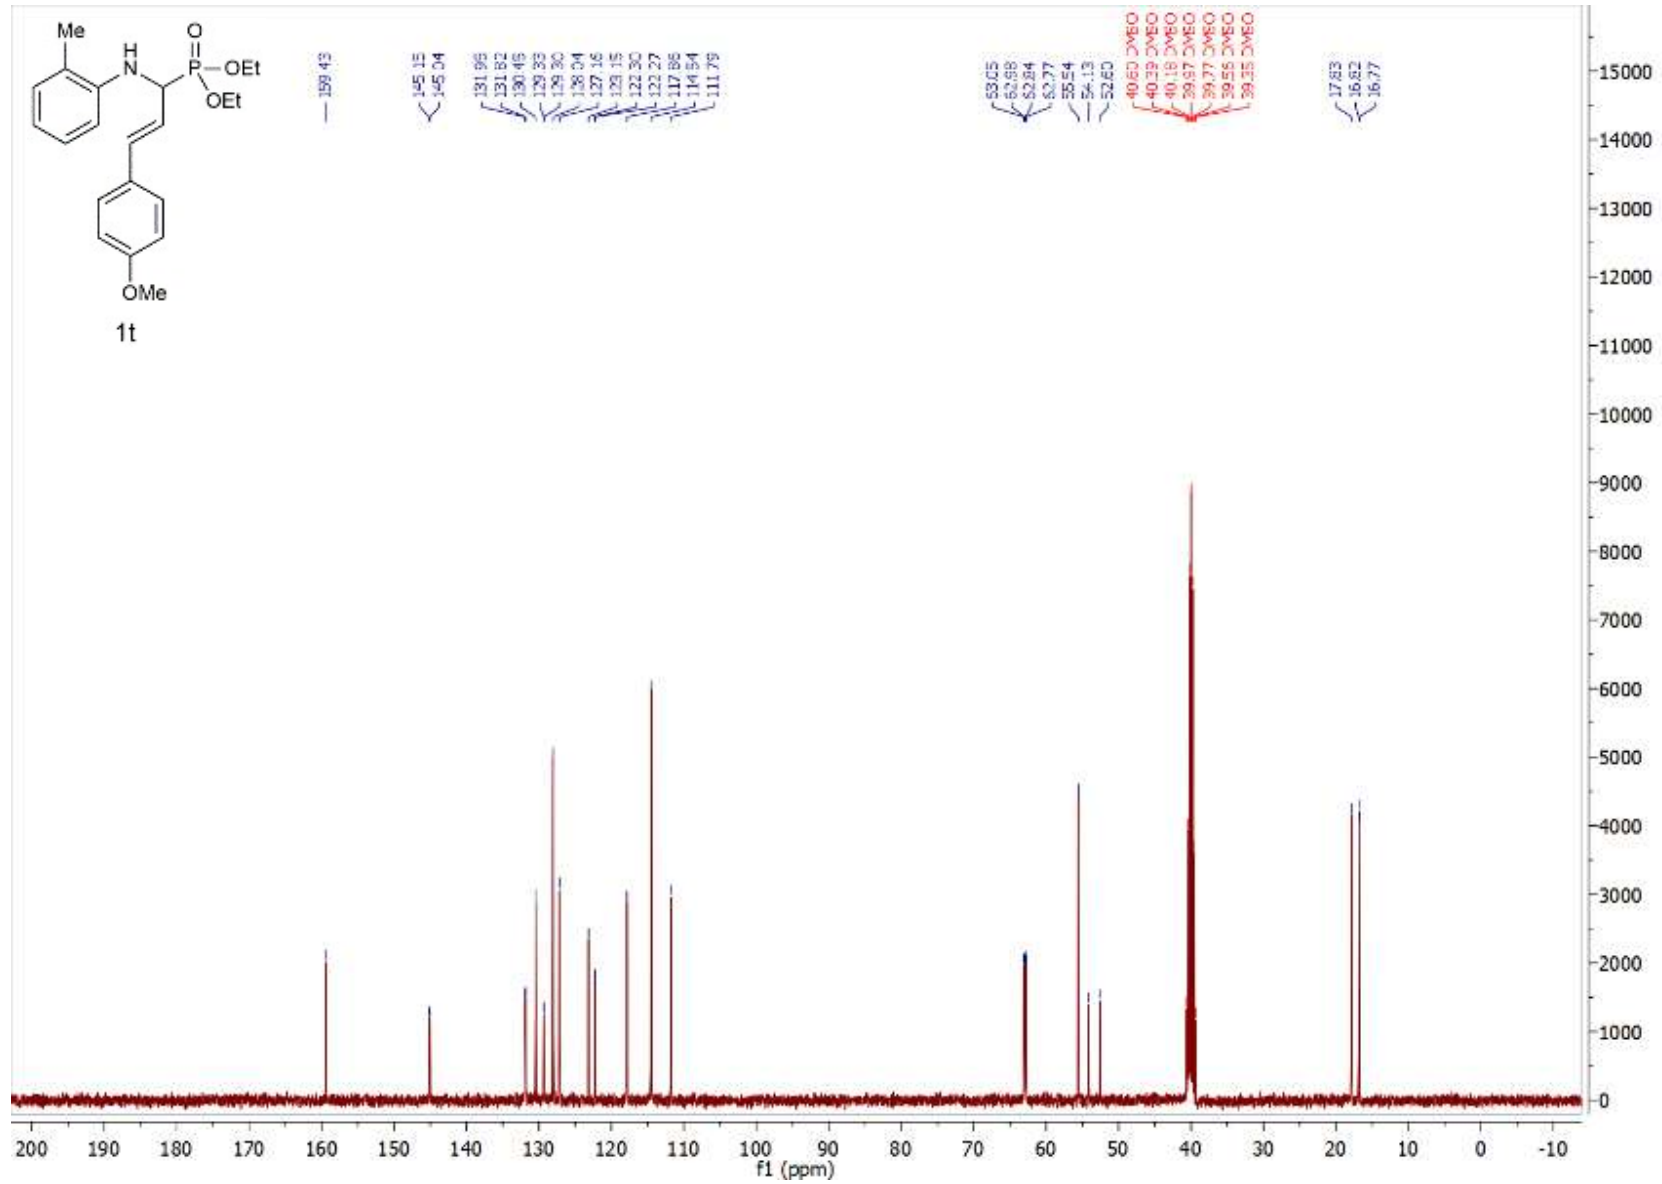

Figure S59:  $^{13}\text{C}$  NMR Spectra of 1t

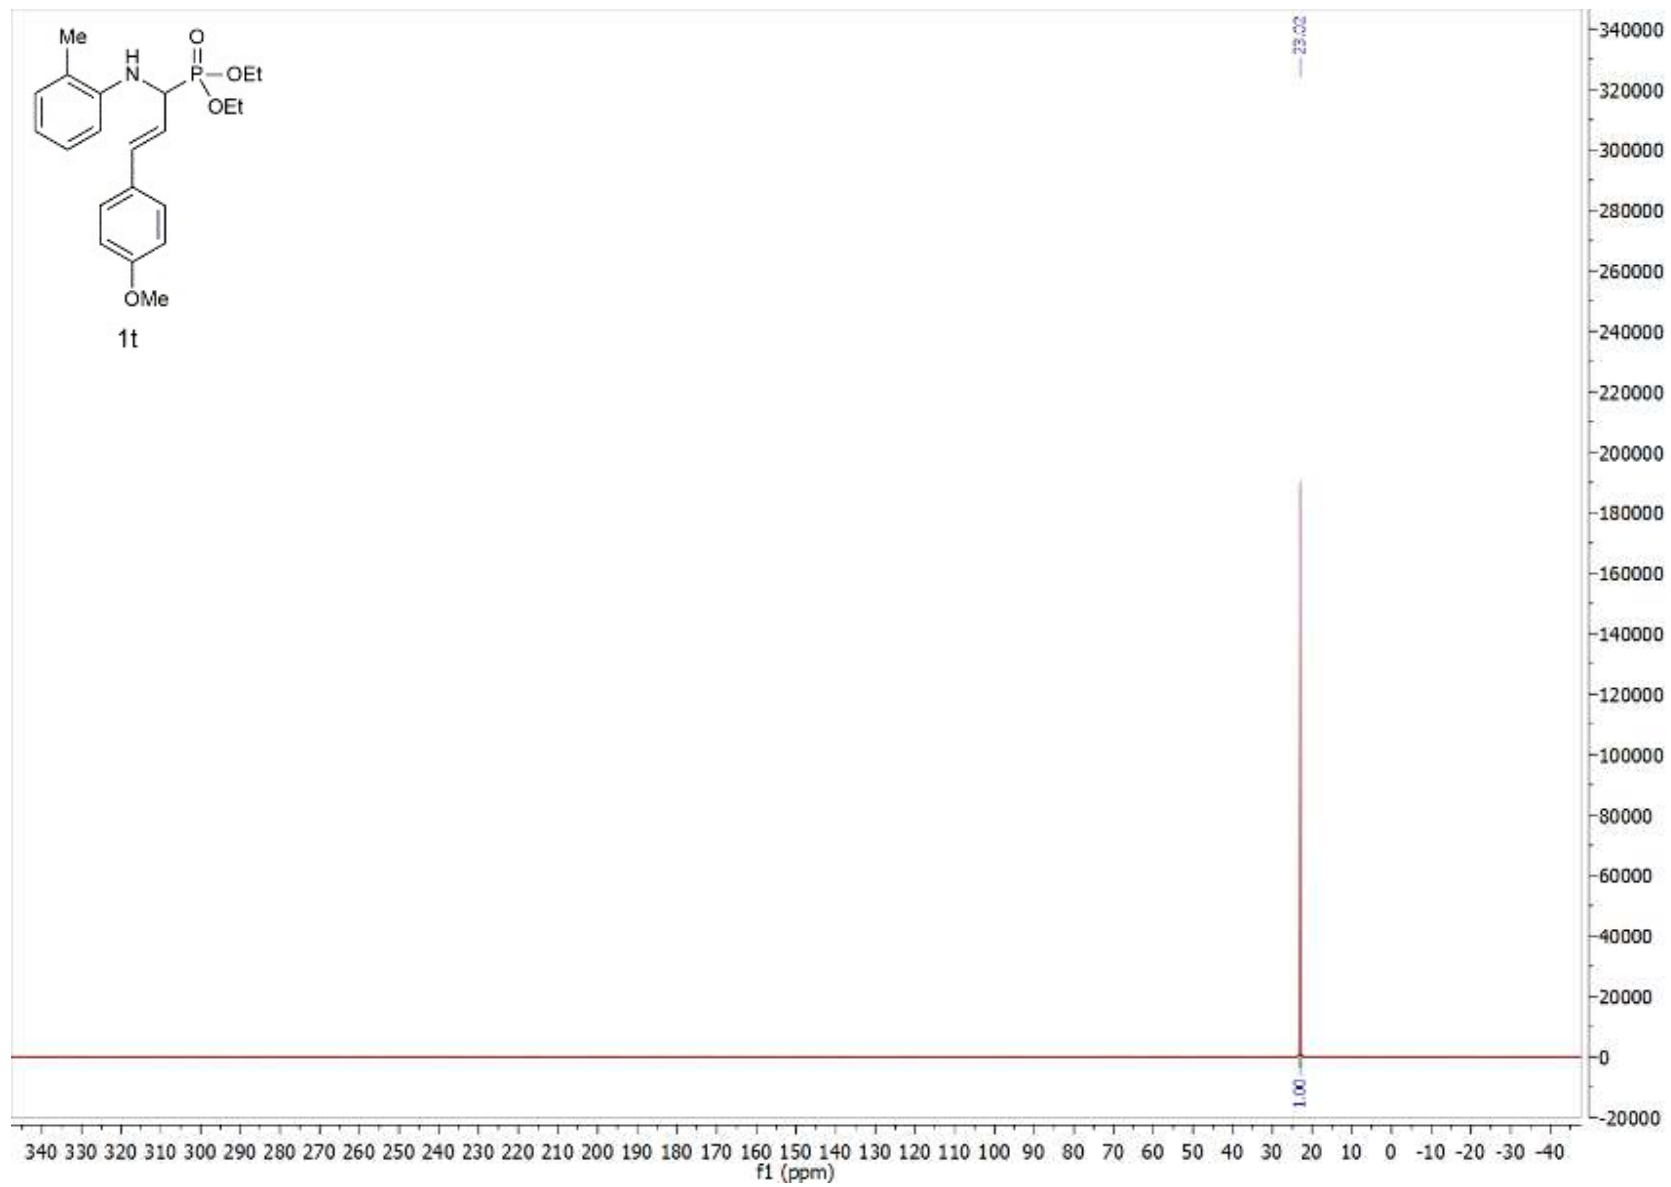

Figure S60:  $^{31}\text{P}$  NMR Spectra of **1t**

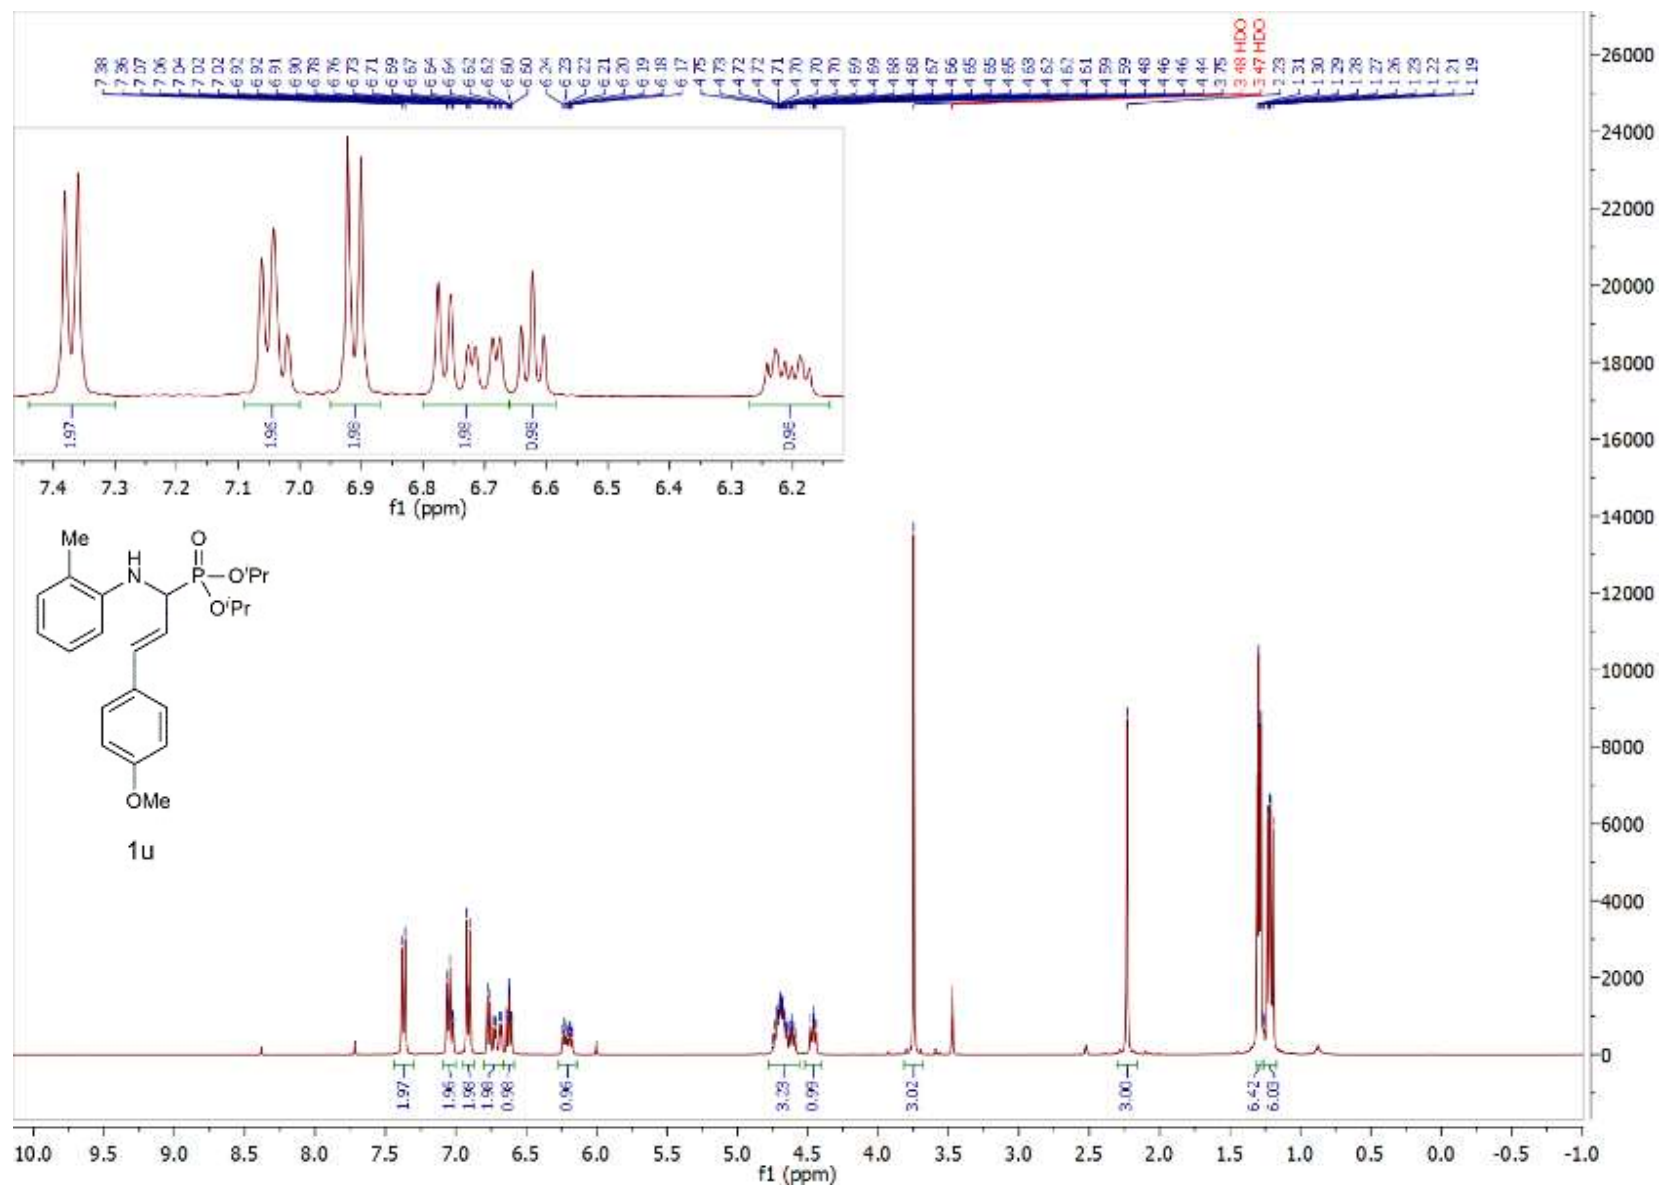

Figure S61: <sup>1</sup>H NMR Spectra of **1u**

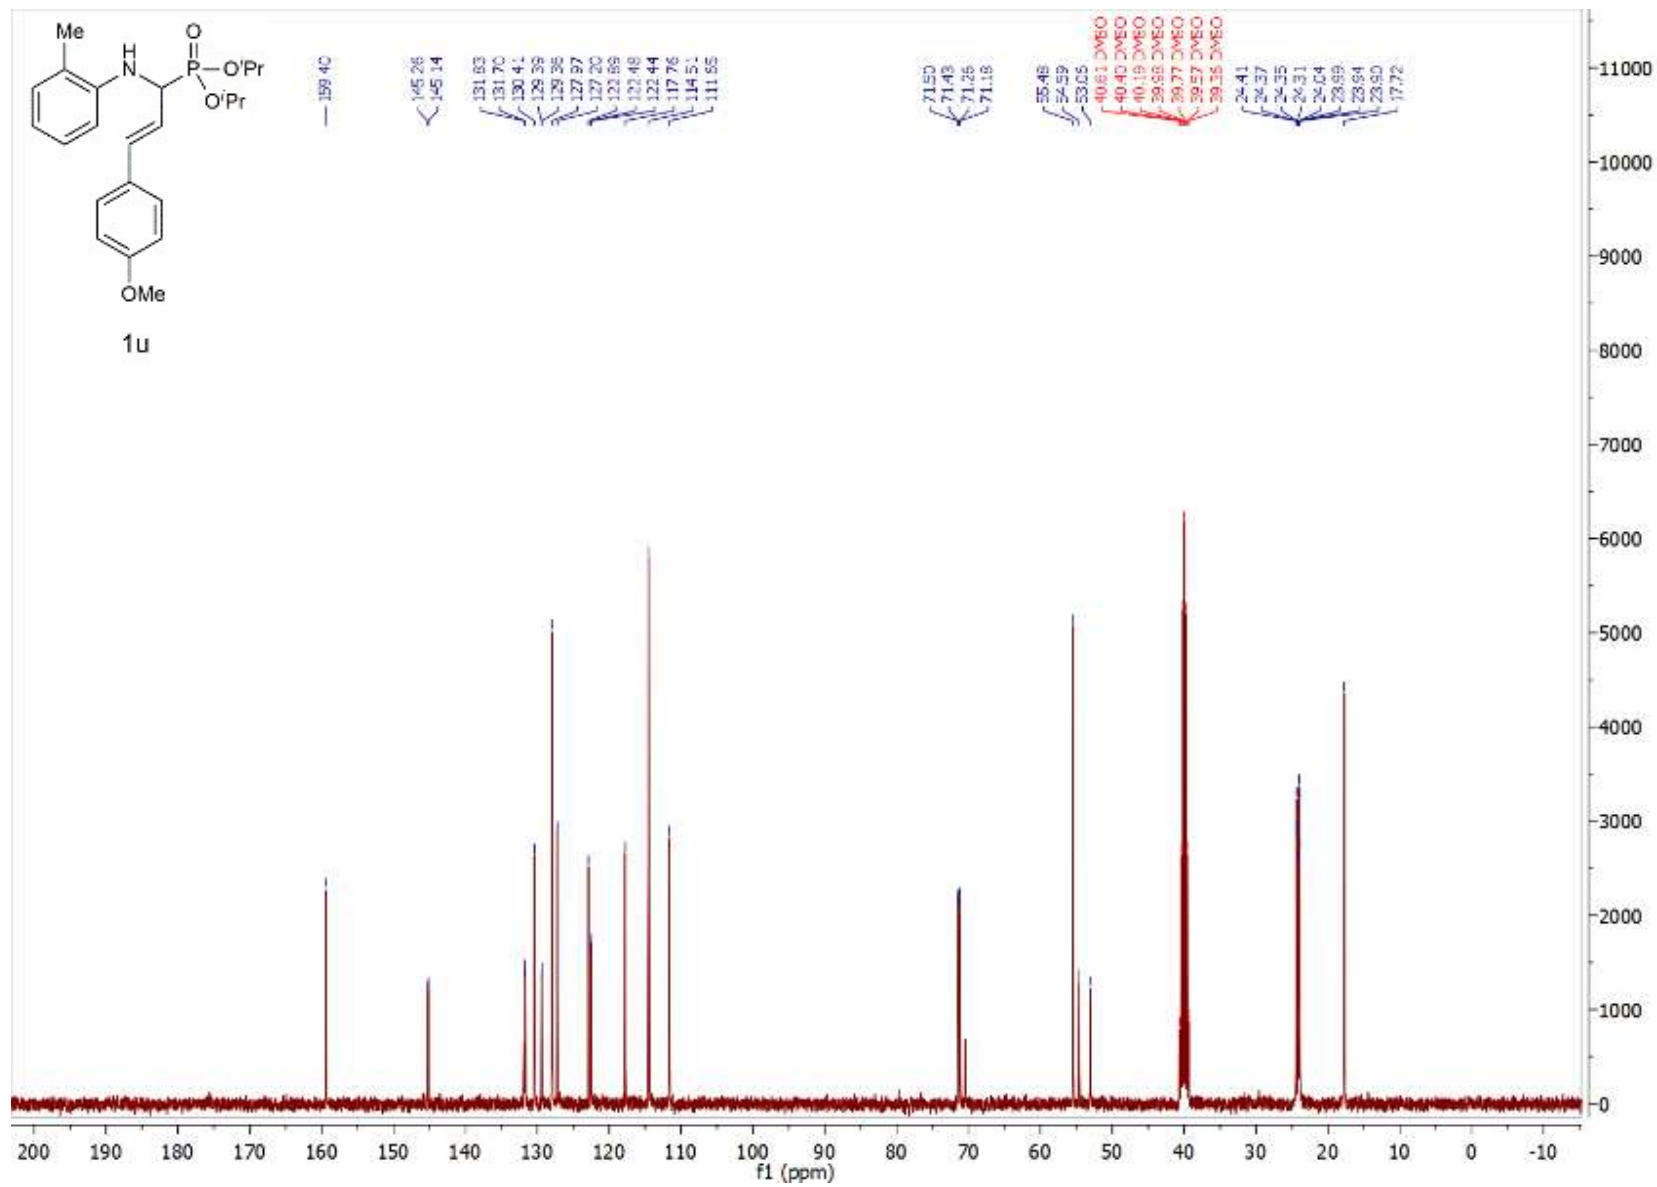

Figure S62: <sup>13</sup>C NMR Spectra of **1u**

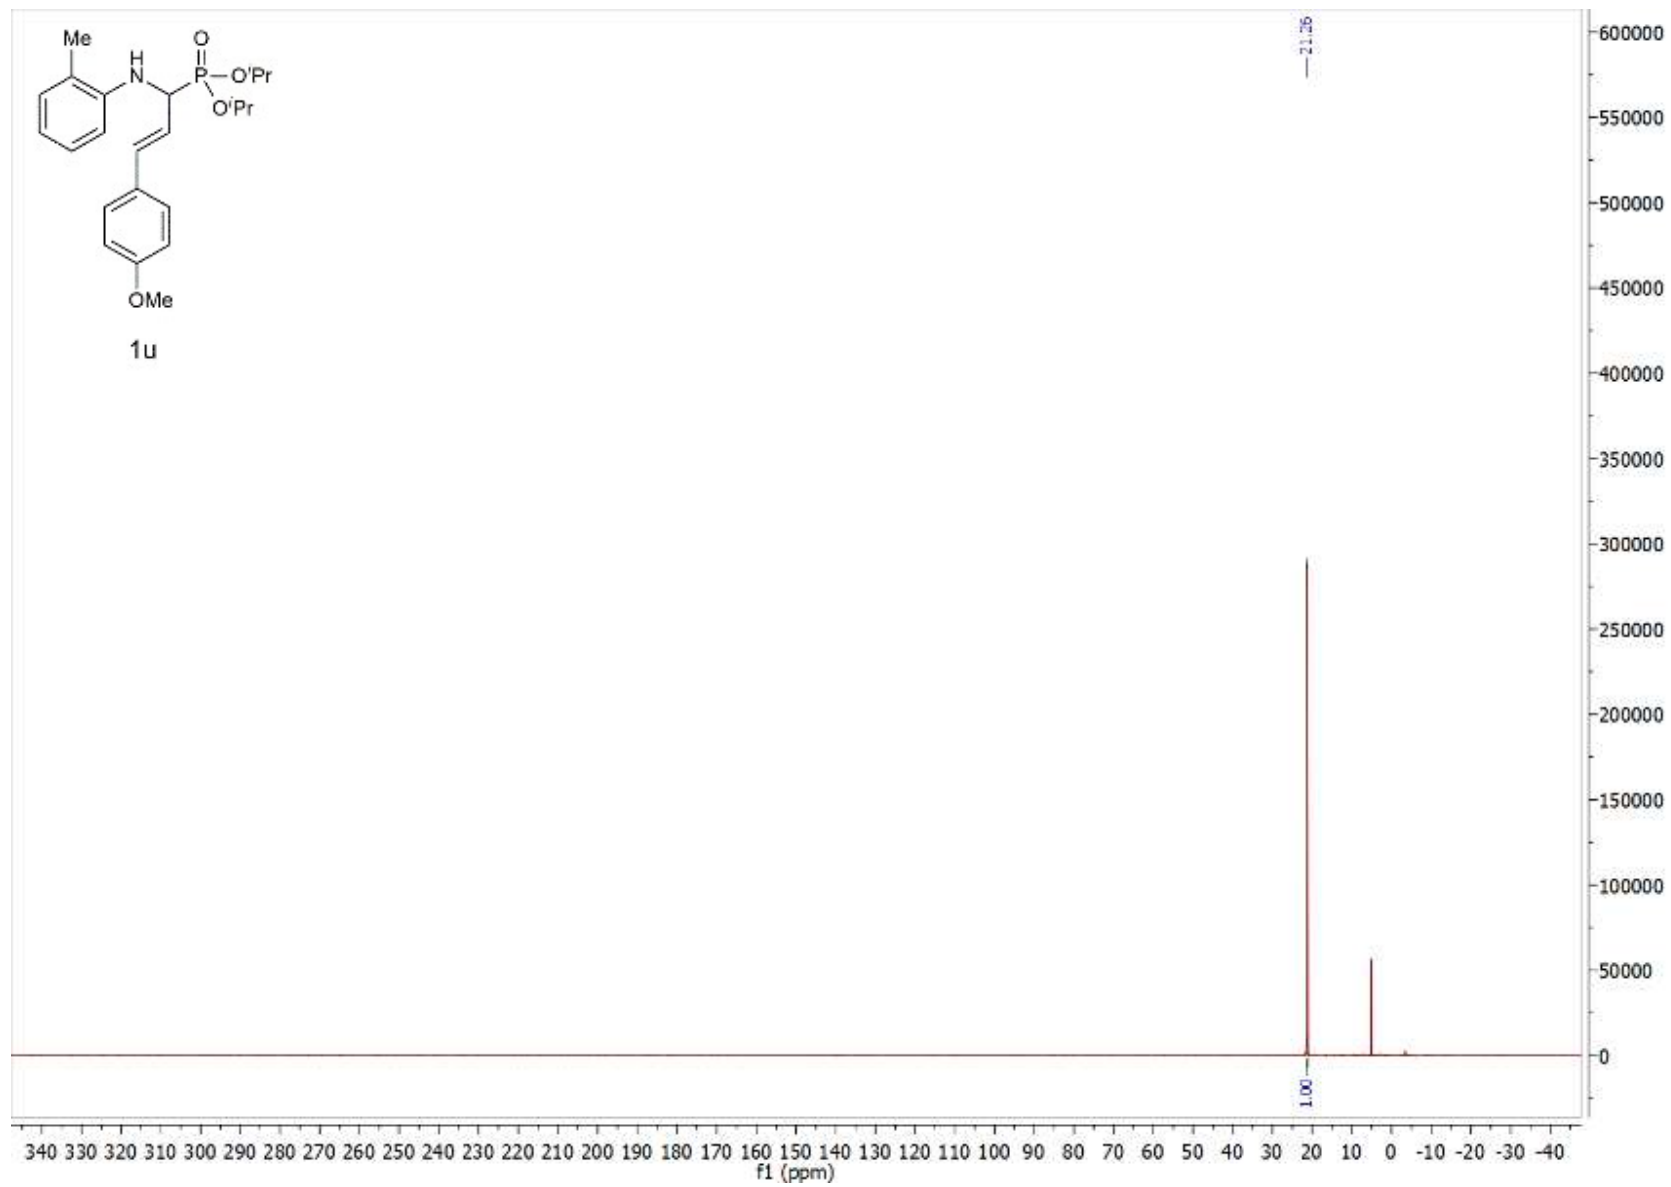

Figure S63:  $^{31}\text{P}$  NMR Spectra of **1u**



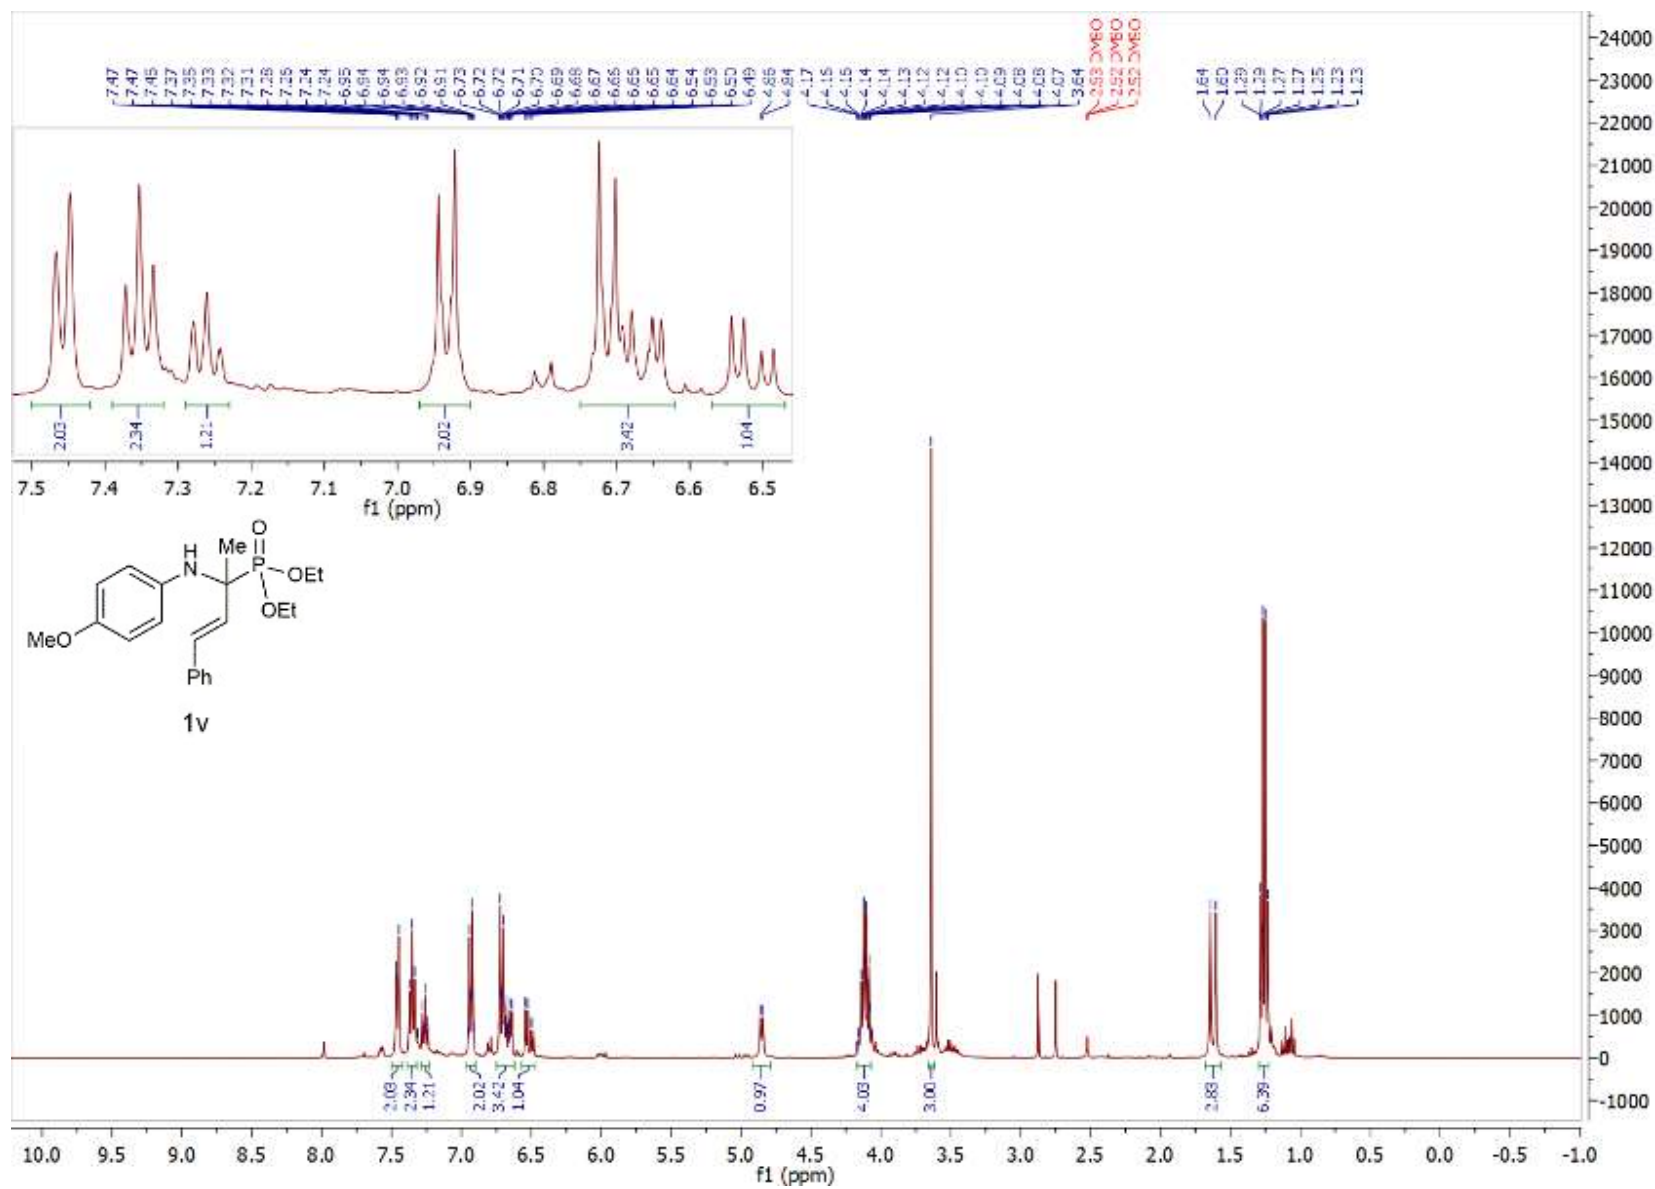

Figure S64: <sup>1</sup>H NMR Spectra of 1v

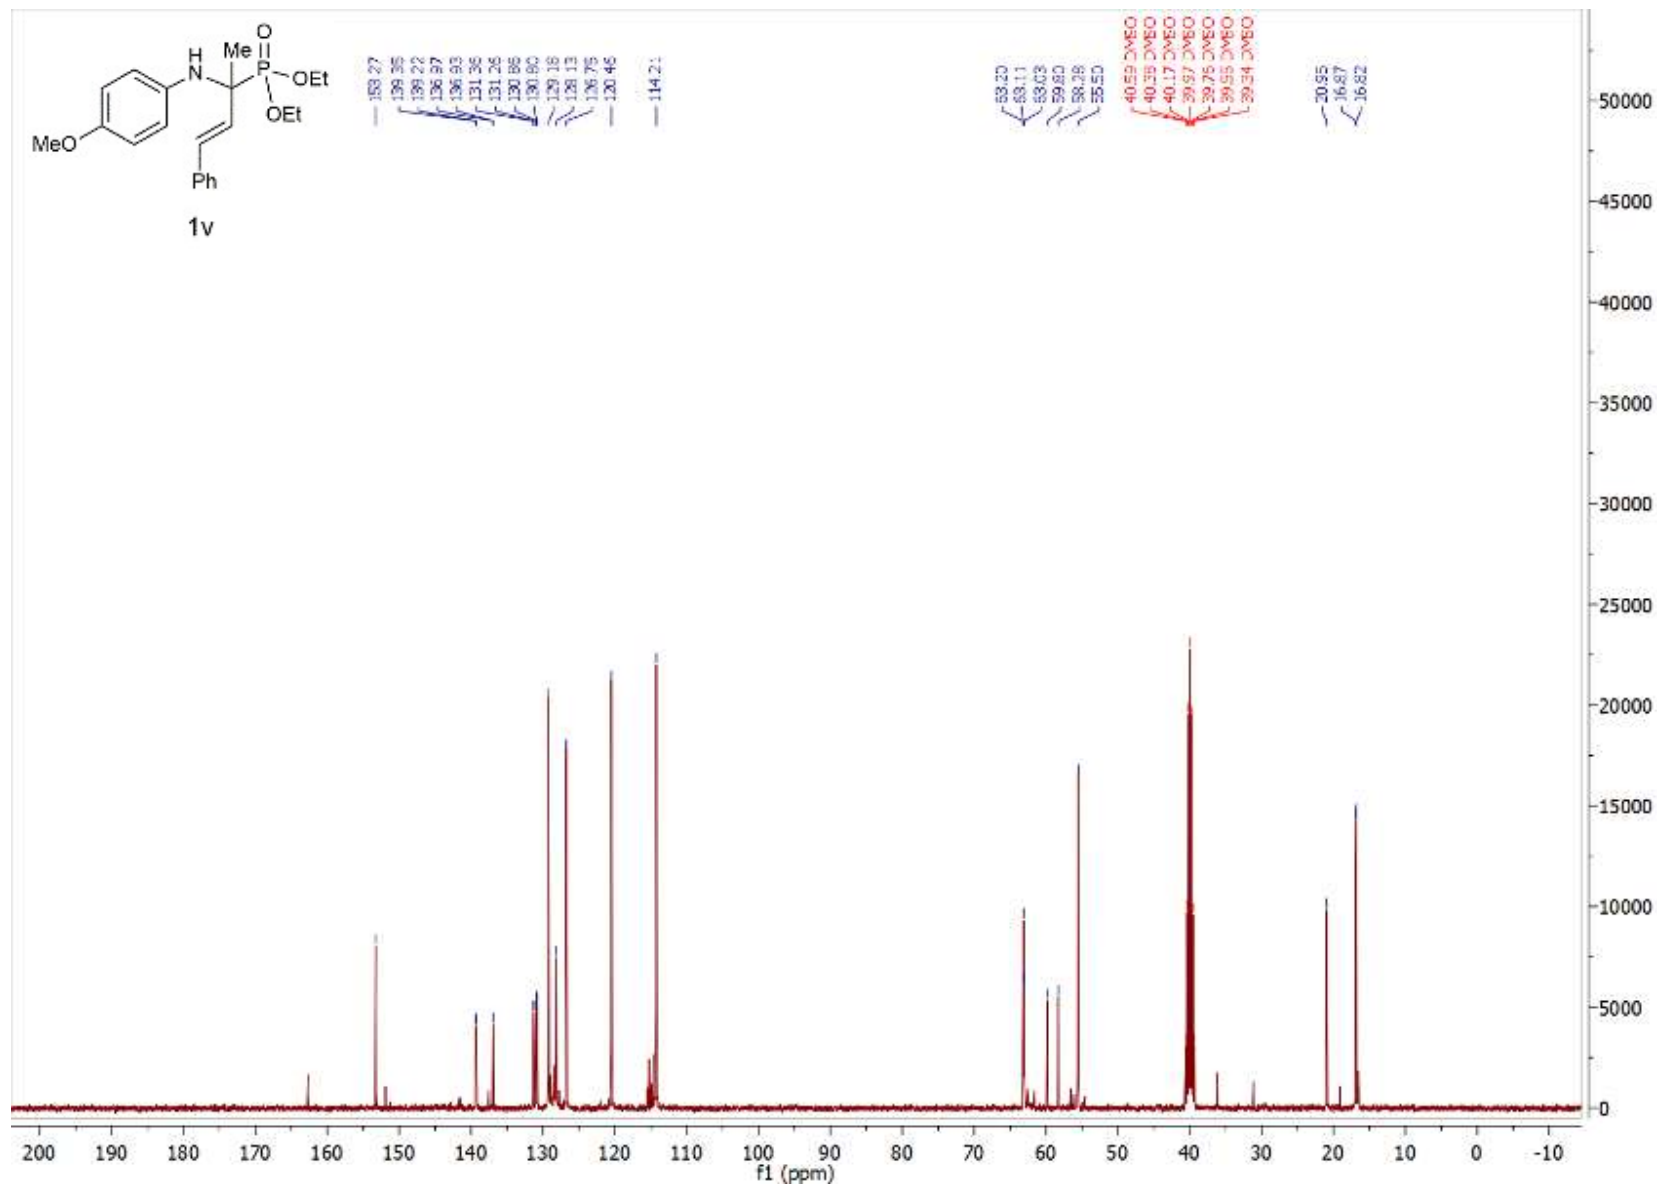

Figure S65: <sup>13</sup>C NMR Spectra of 1v

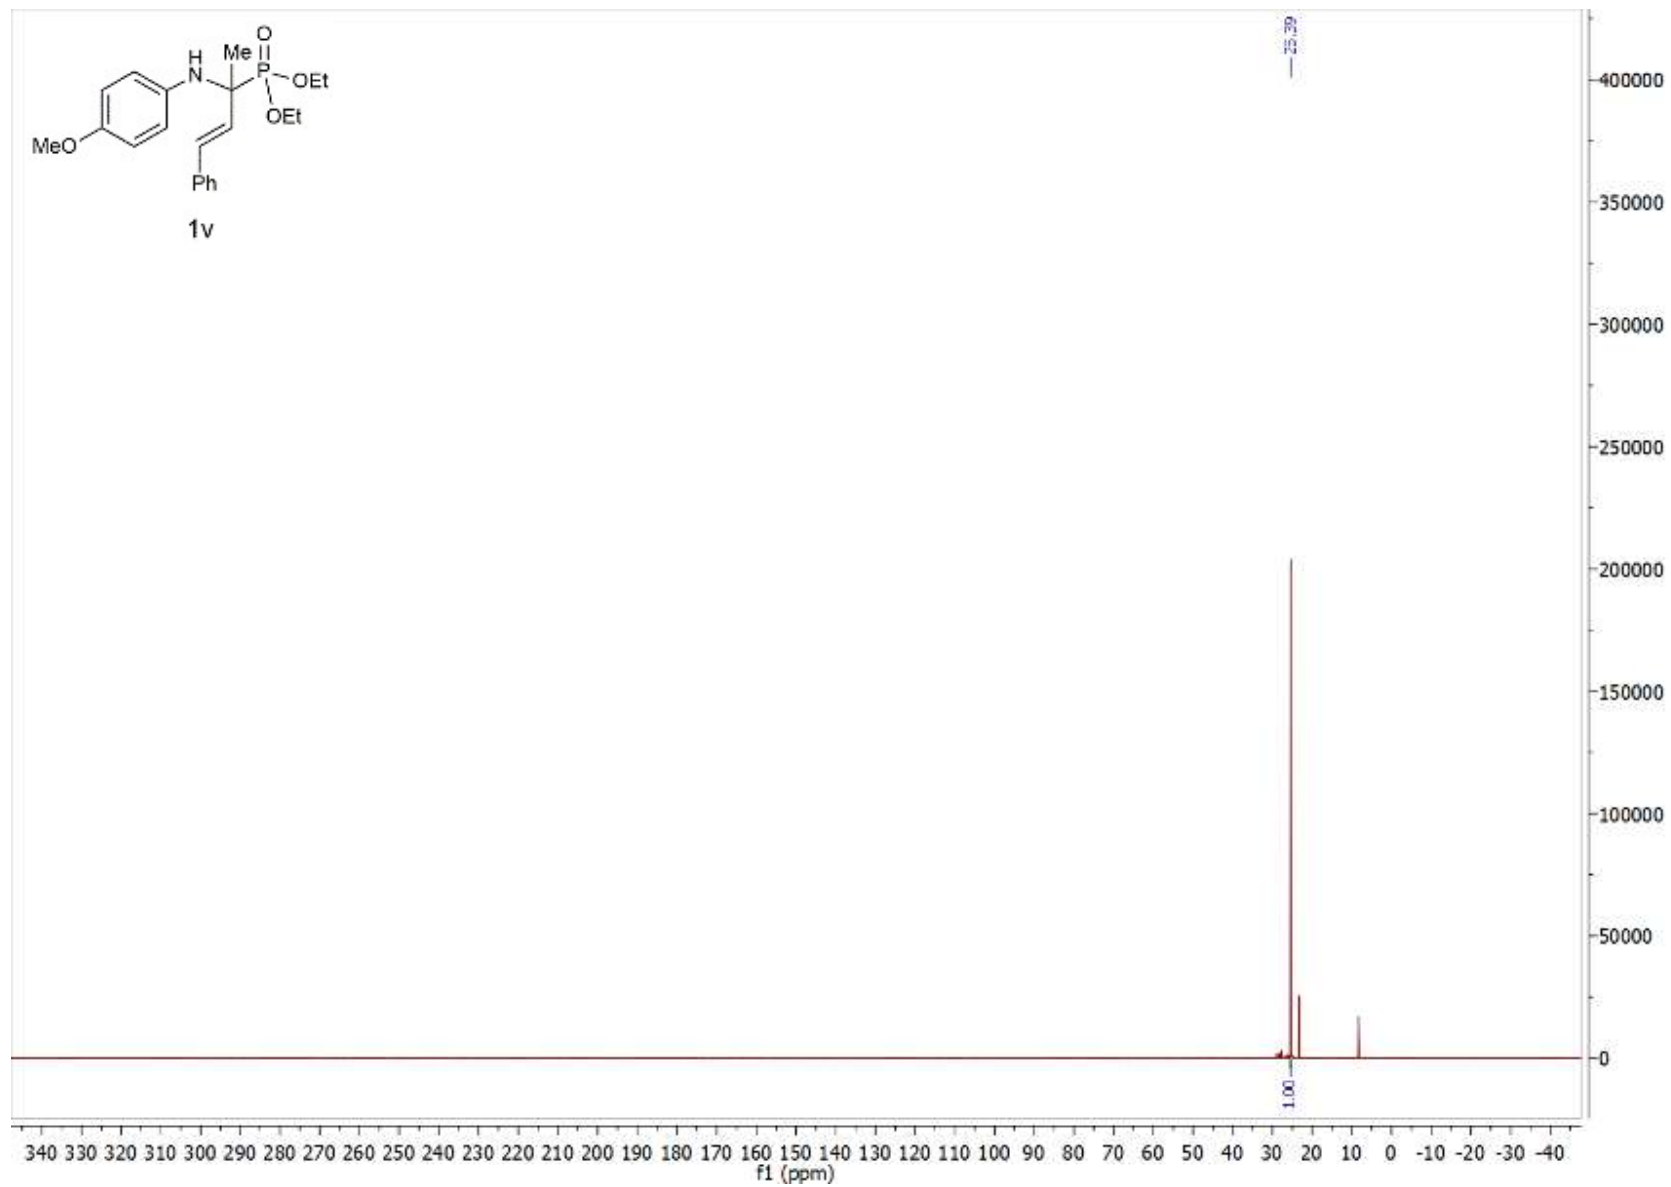

Figure S66:  $^{31}\text{P}$  NMR Spectra of **1v**

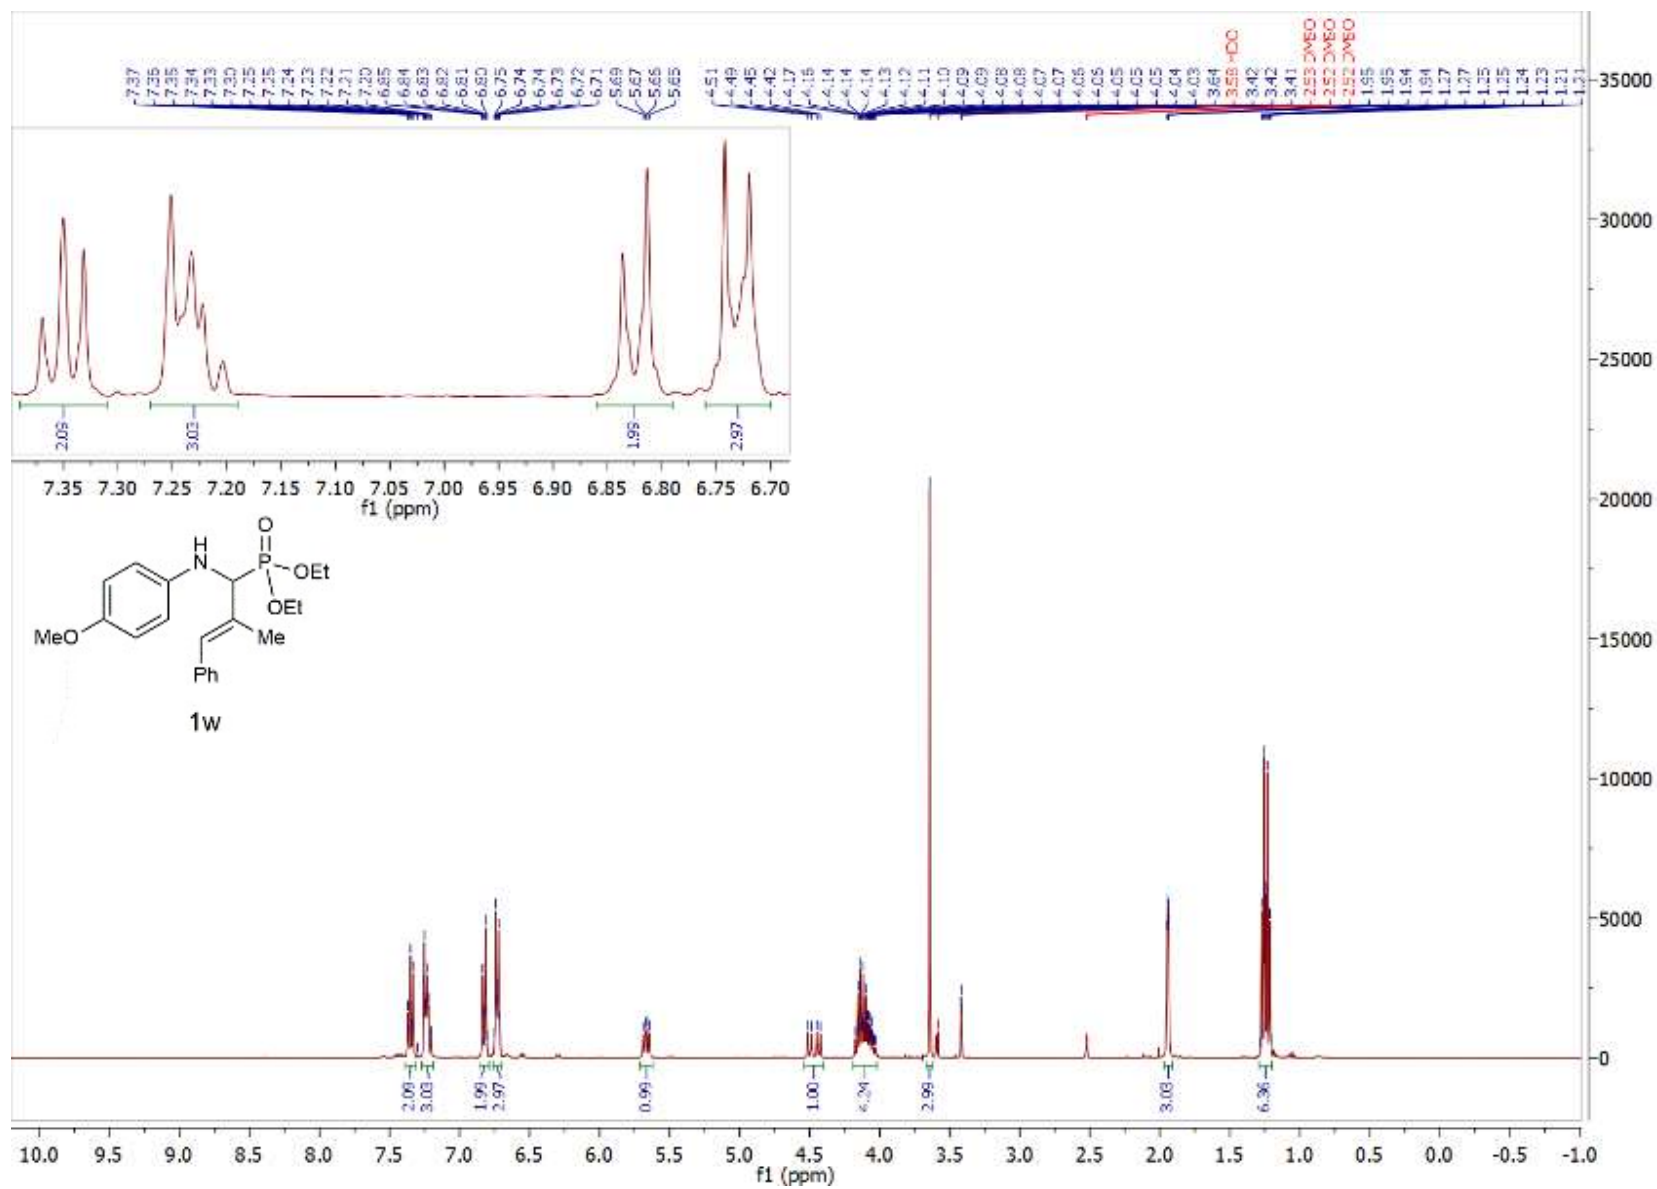

Figure S67: <sup>1</sup>H NMR Spectra of 1w

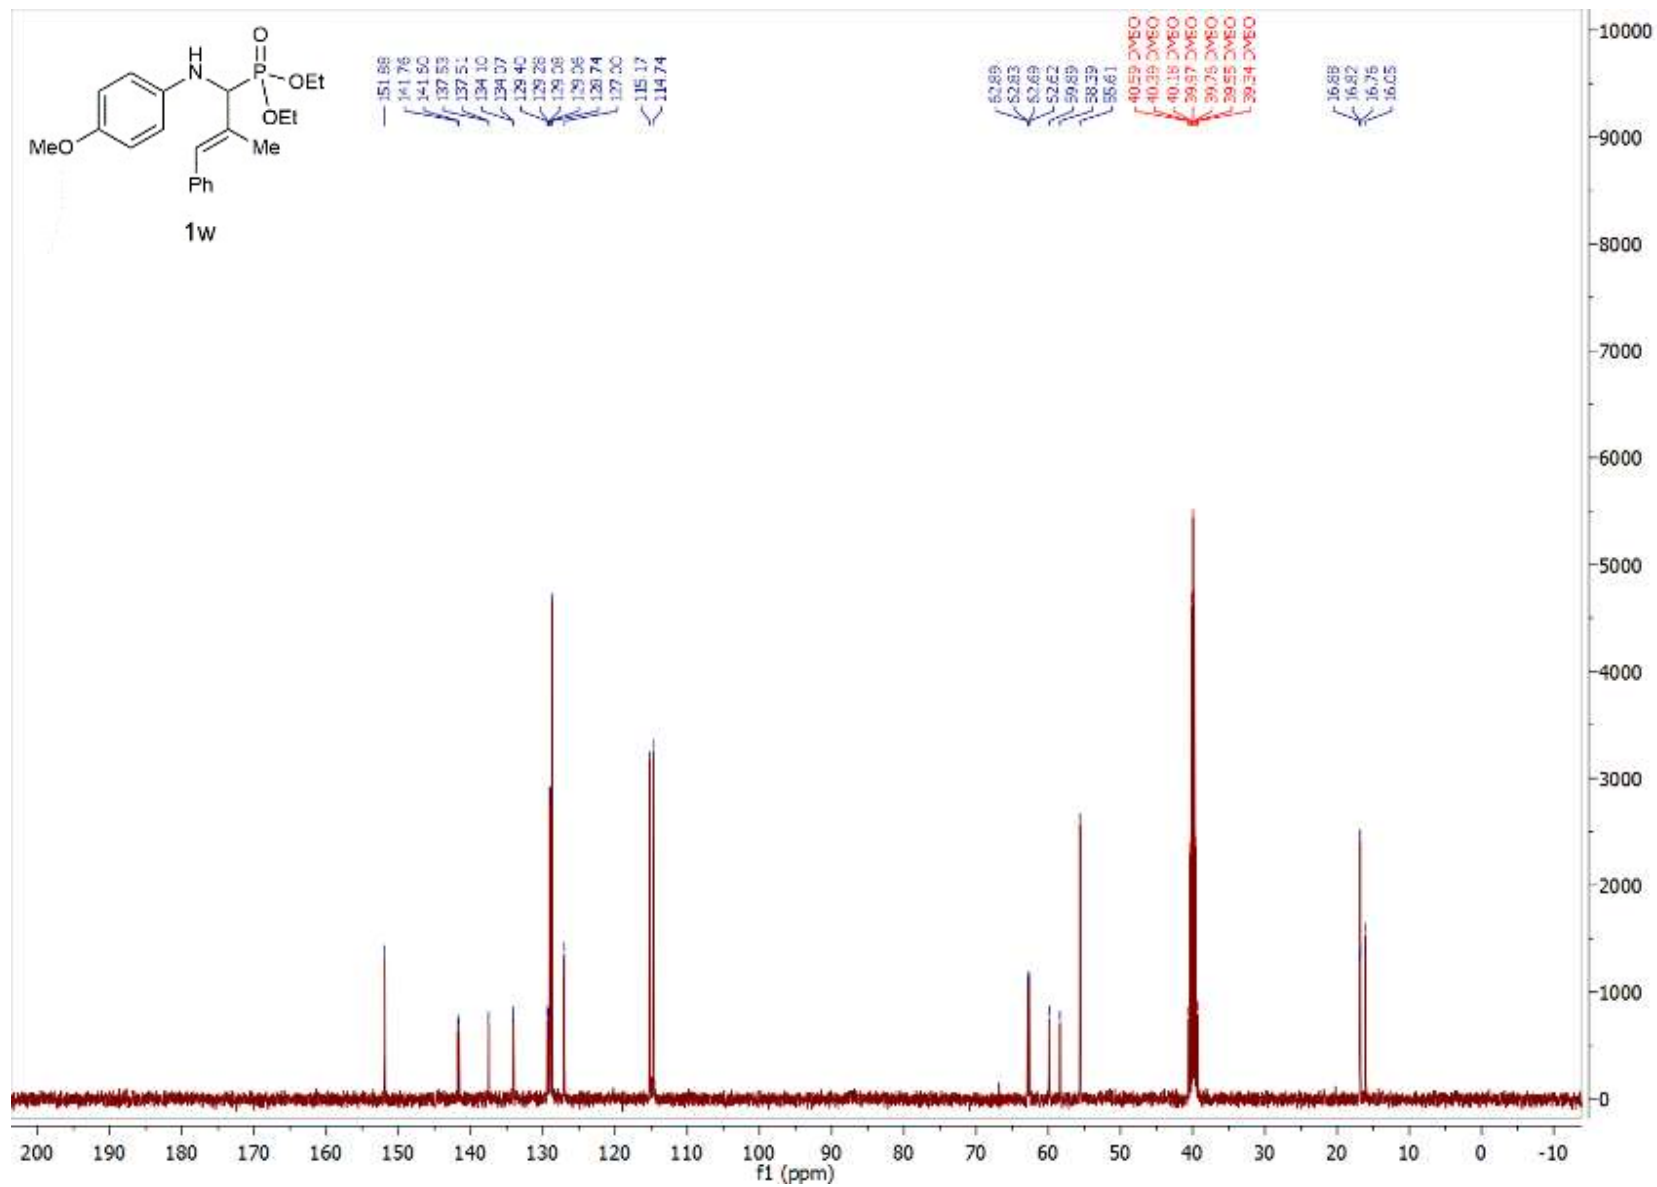

Figure S68: <sup>13</sup>C NMR Spectra of 1w

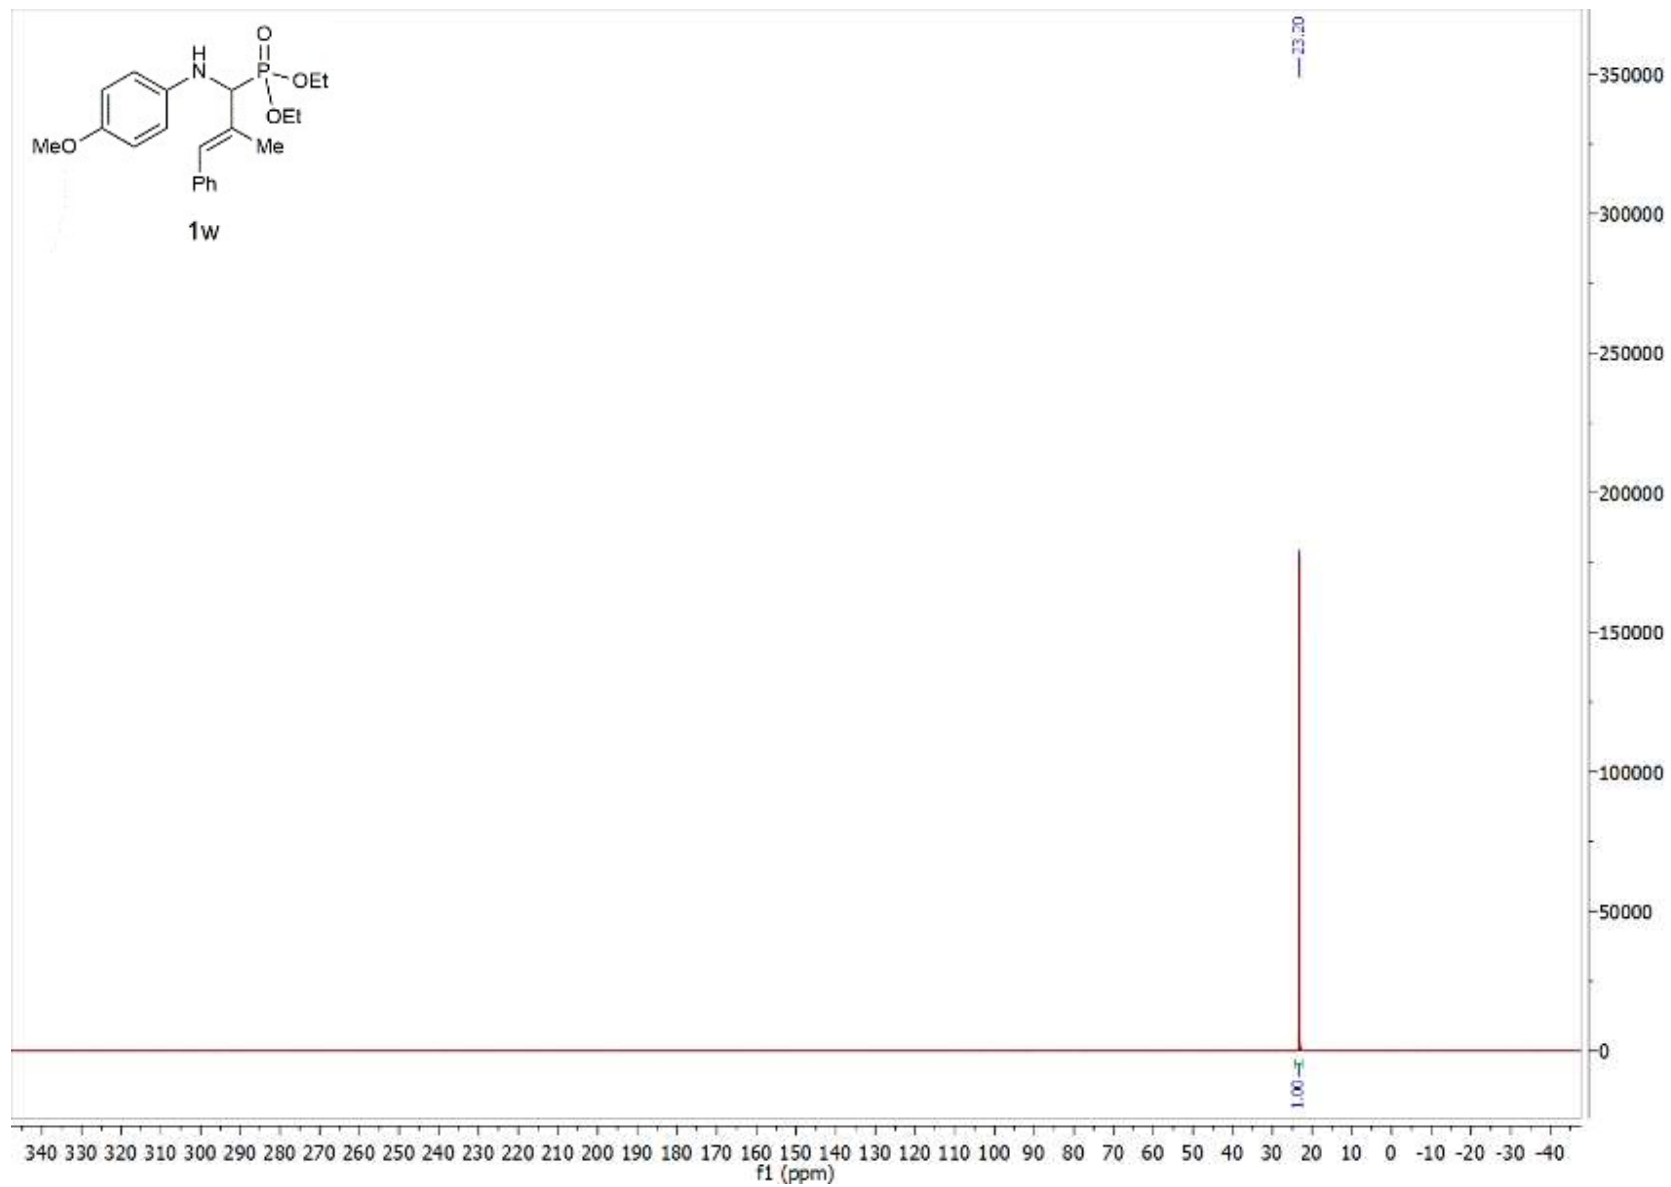

Figure S69:  $^{31}\text{P}$  NMR Spectra of **1w**

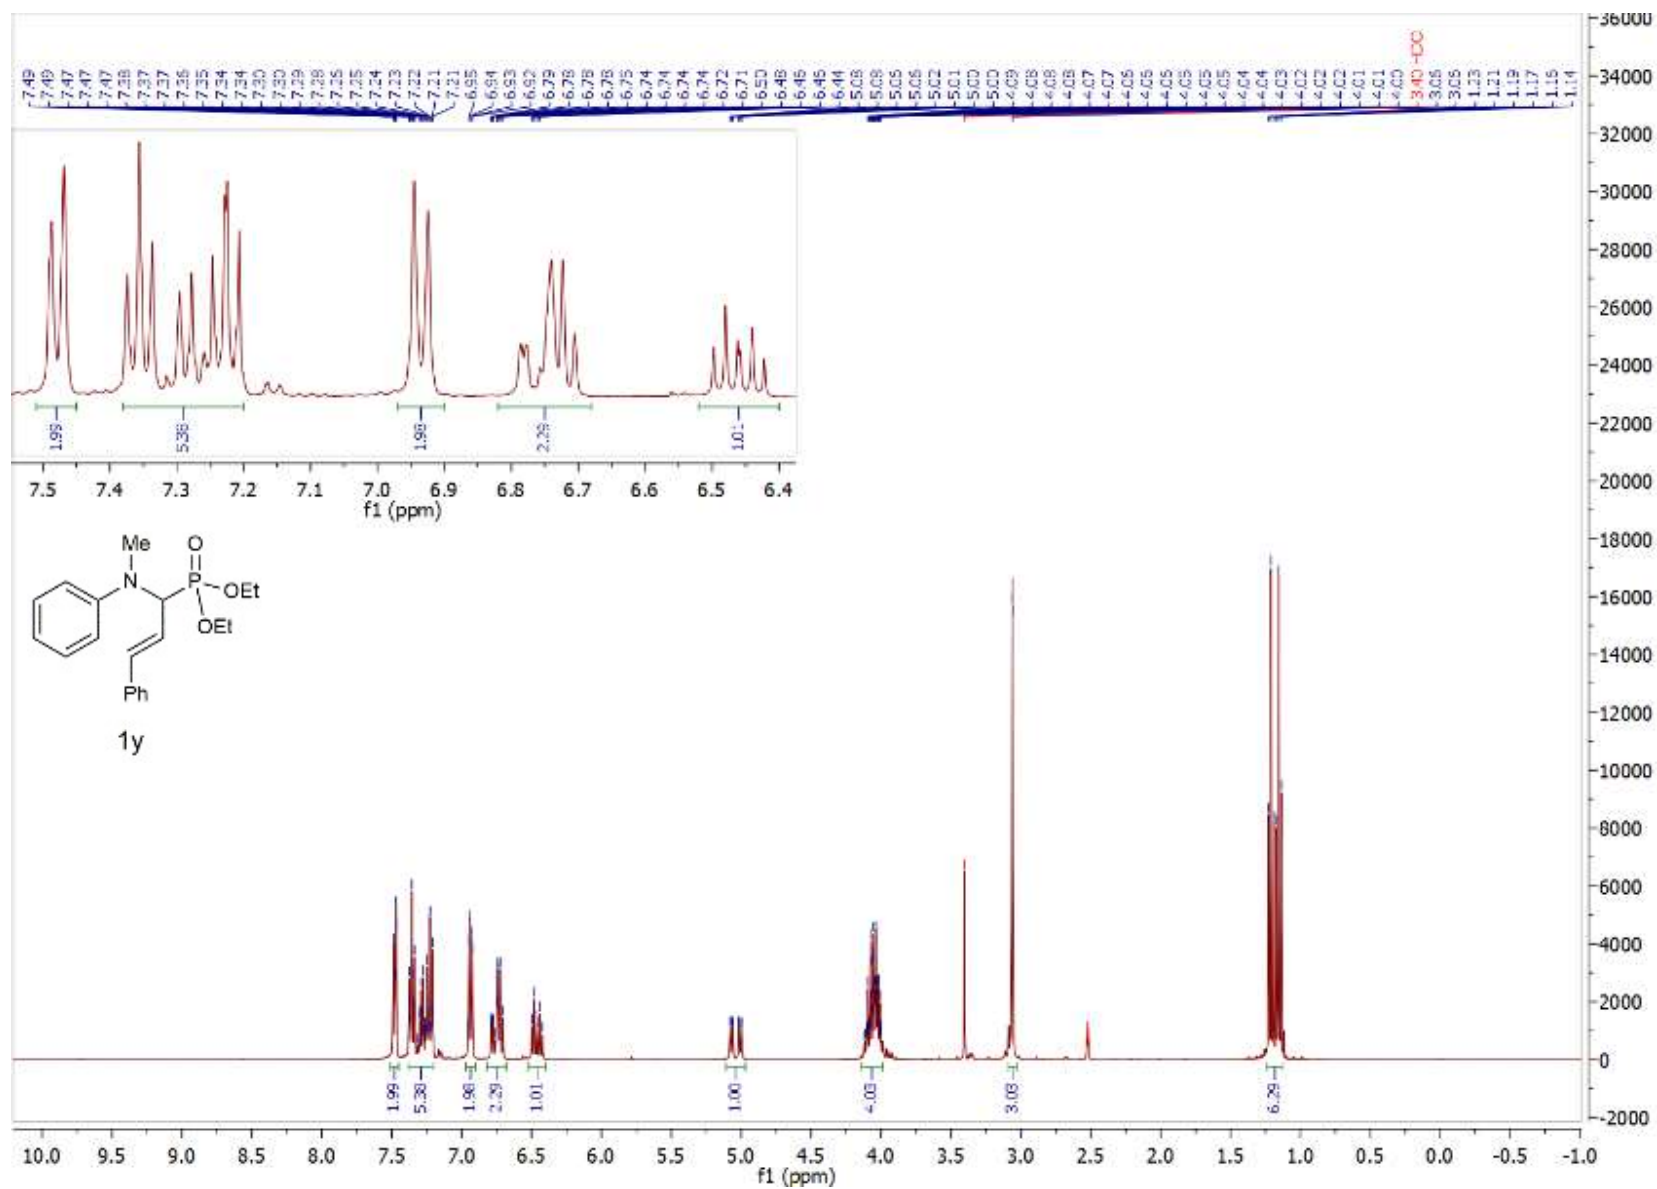

Figure S70:  $^1\text{H}$  NMR Spectra of **1y**

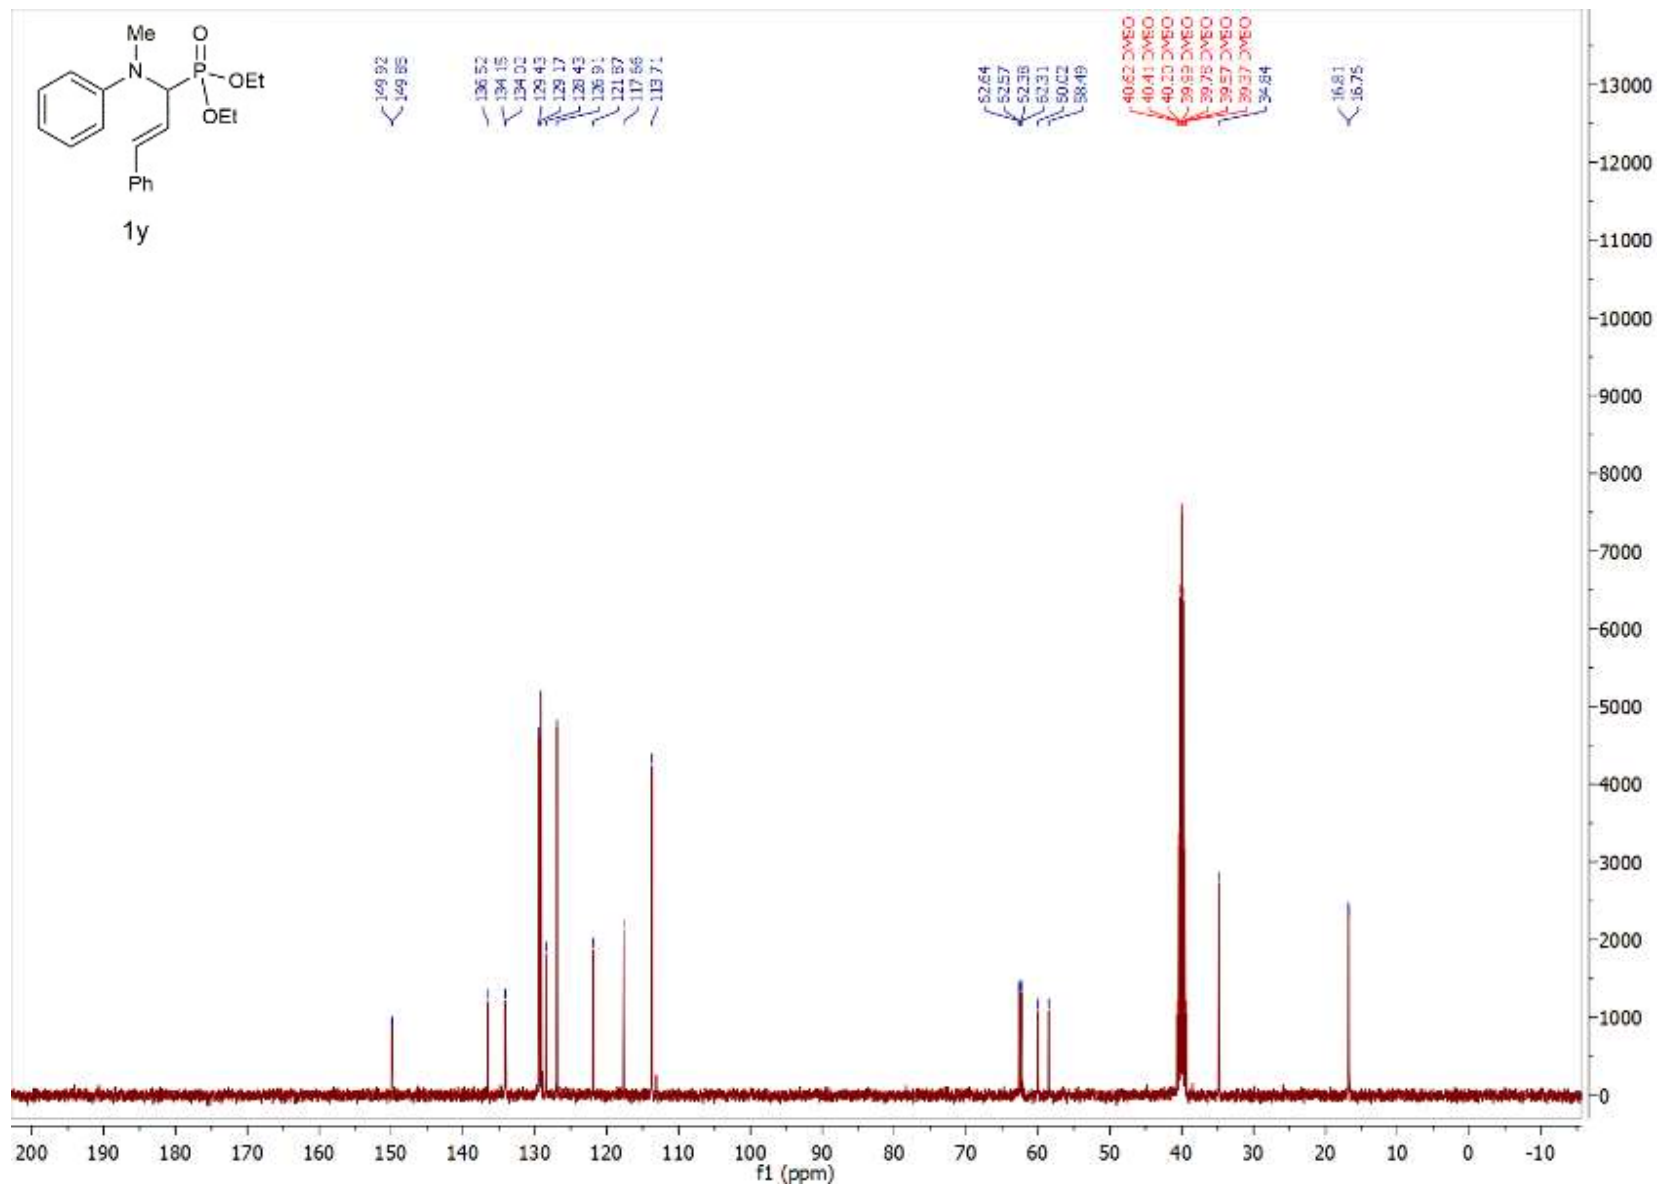

Figure S71: <sup>13</sup>C NMR Spectra of **1y**



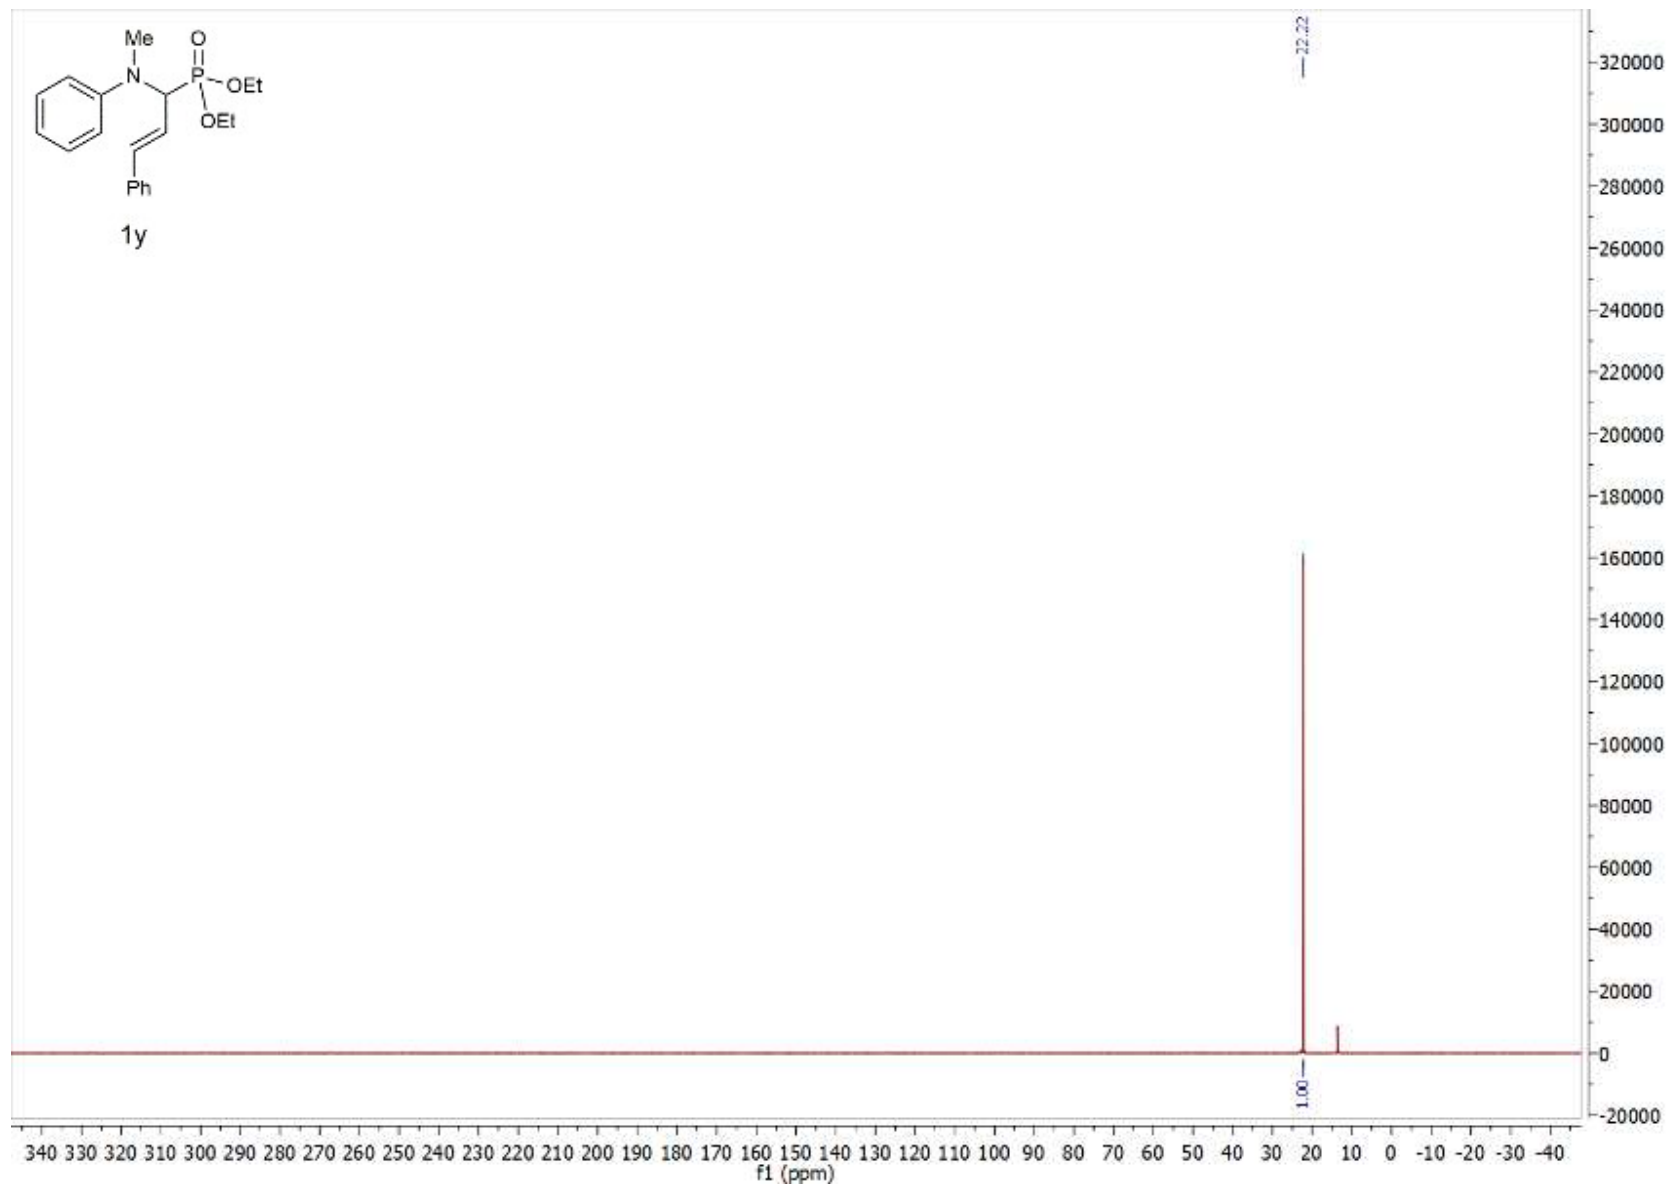

Figure S72:  $^{31}\text{P}$  NMR Spectra of **1y**

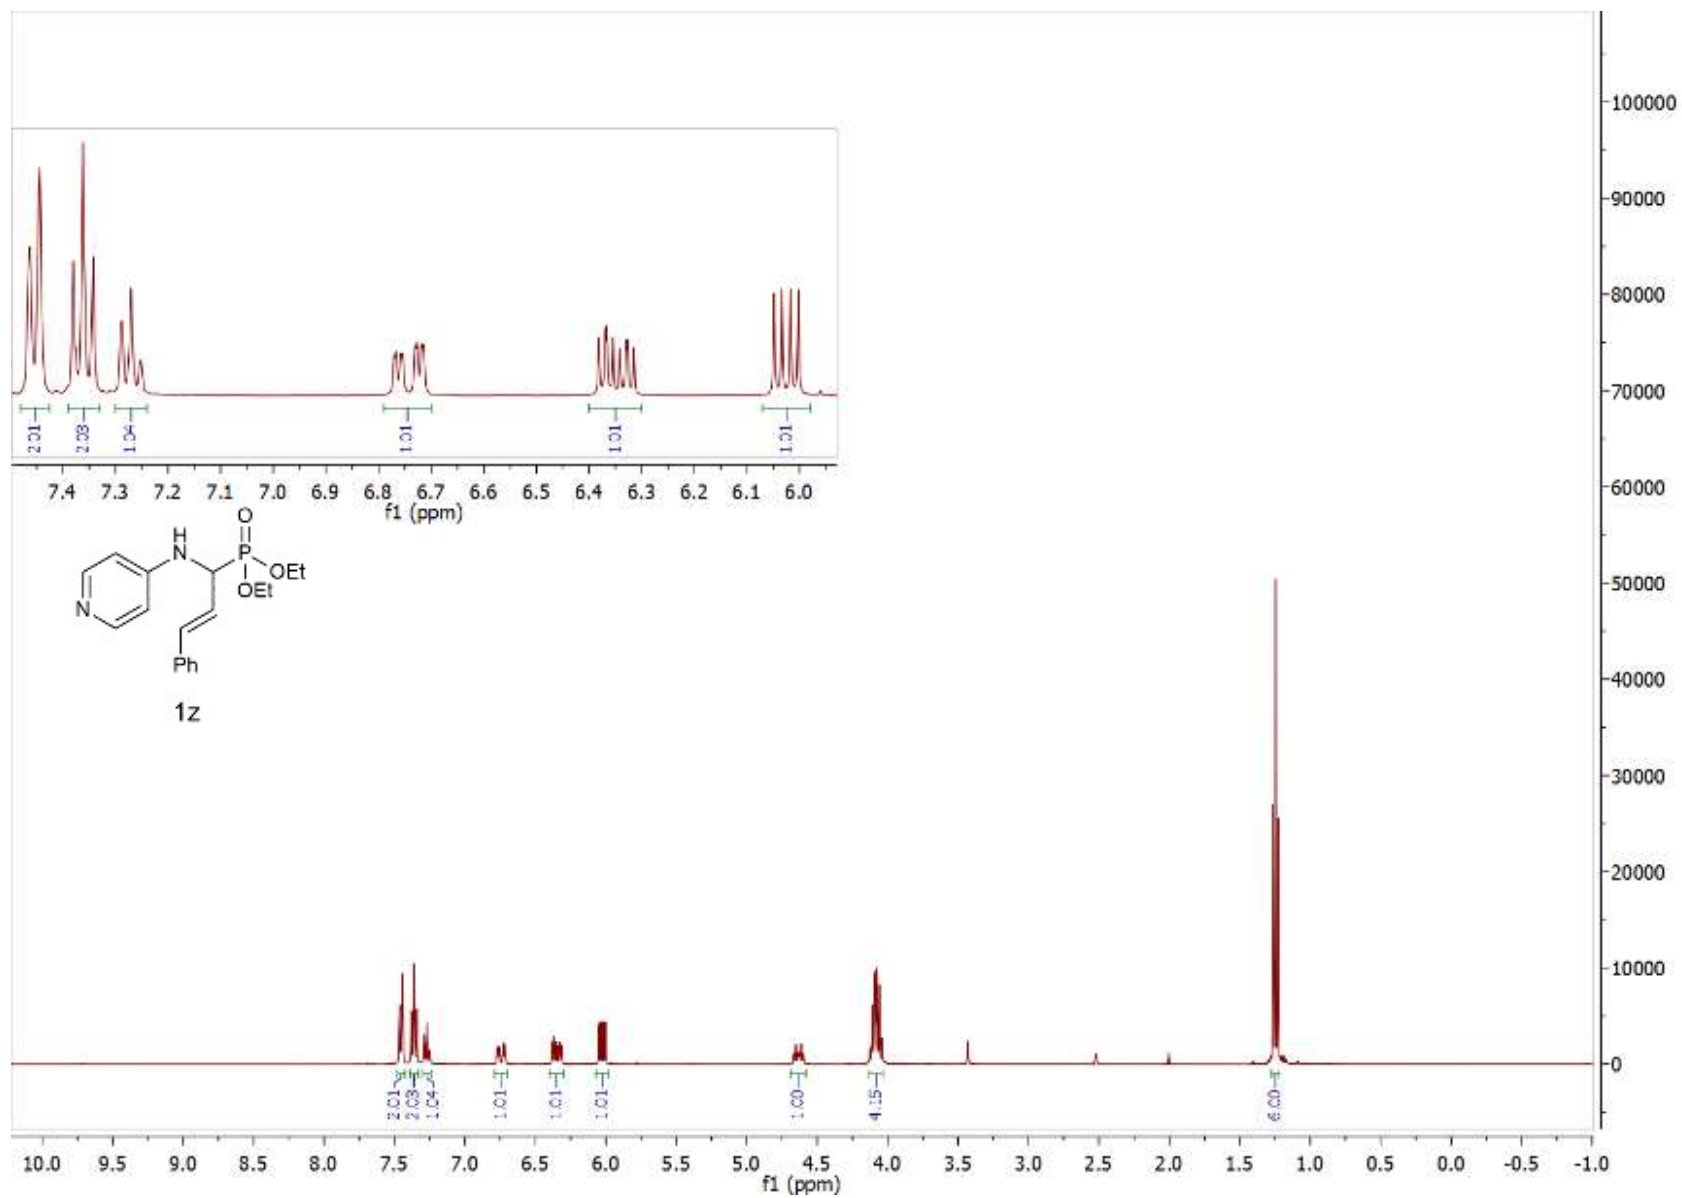

Figure S73:  $^1\text{H}$  NMR Spectra of **1z**

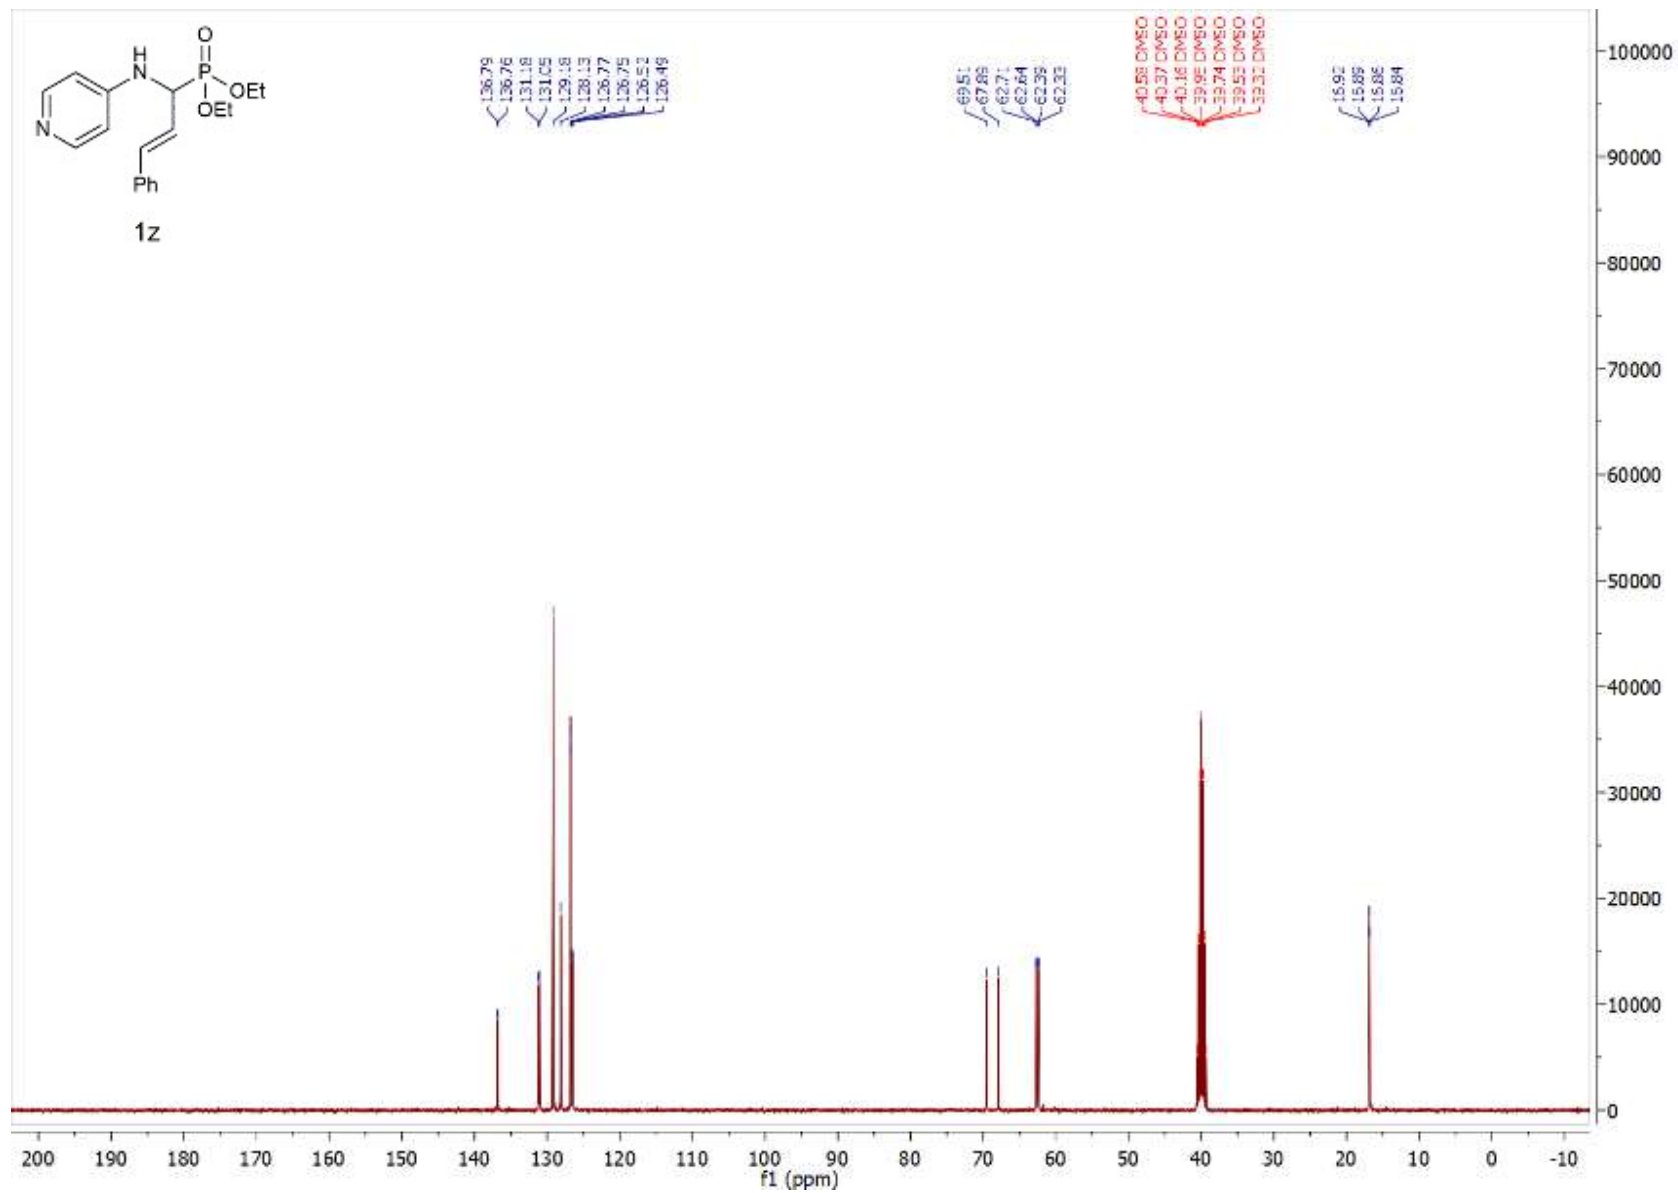

Figure S74:  $^{13}\text{C}$  NMR Spectra of 1z

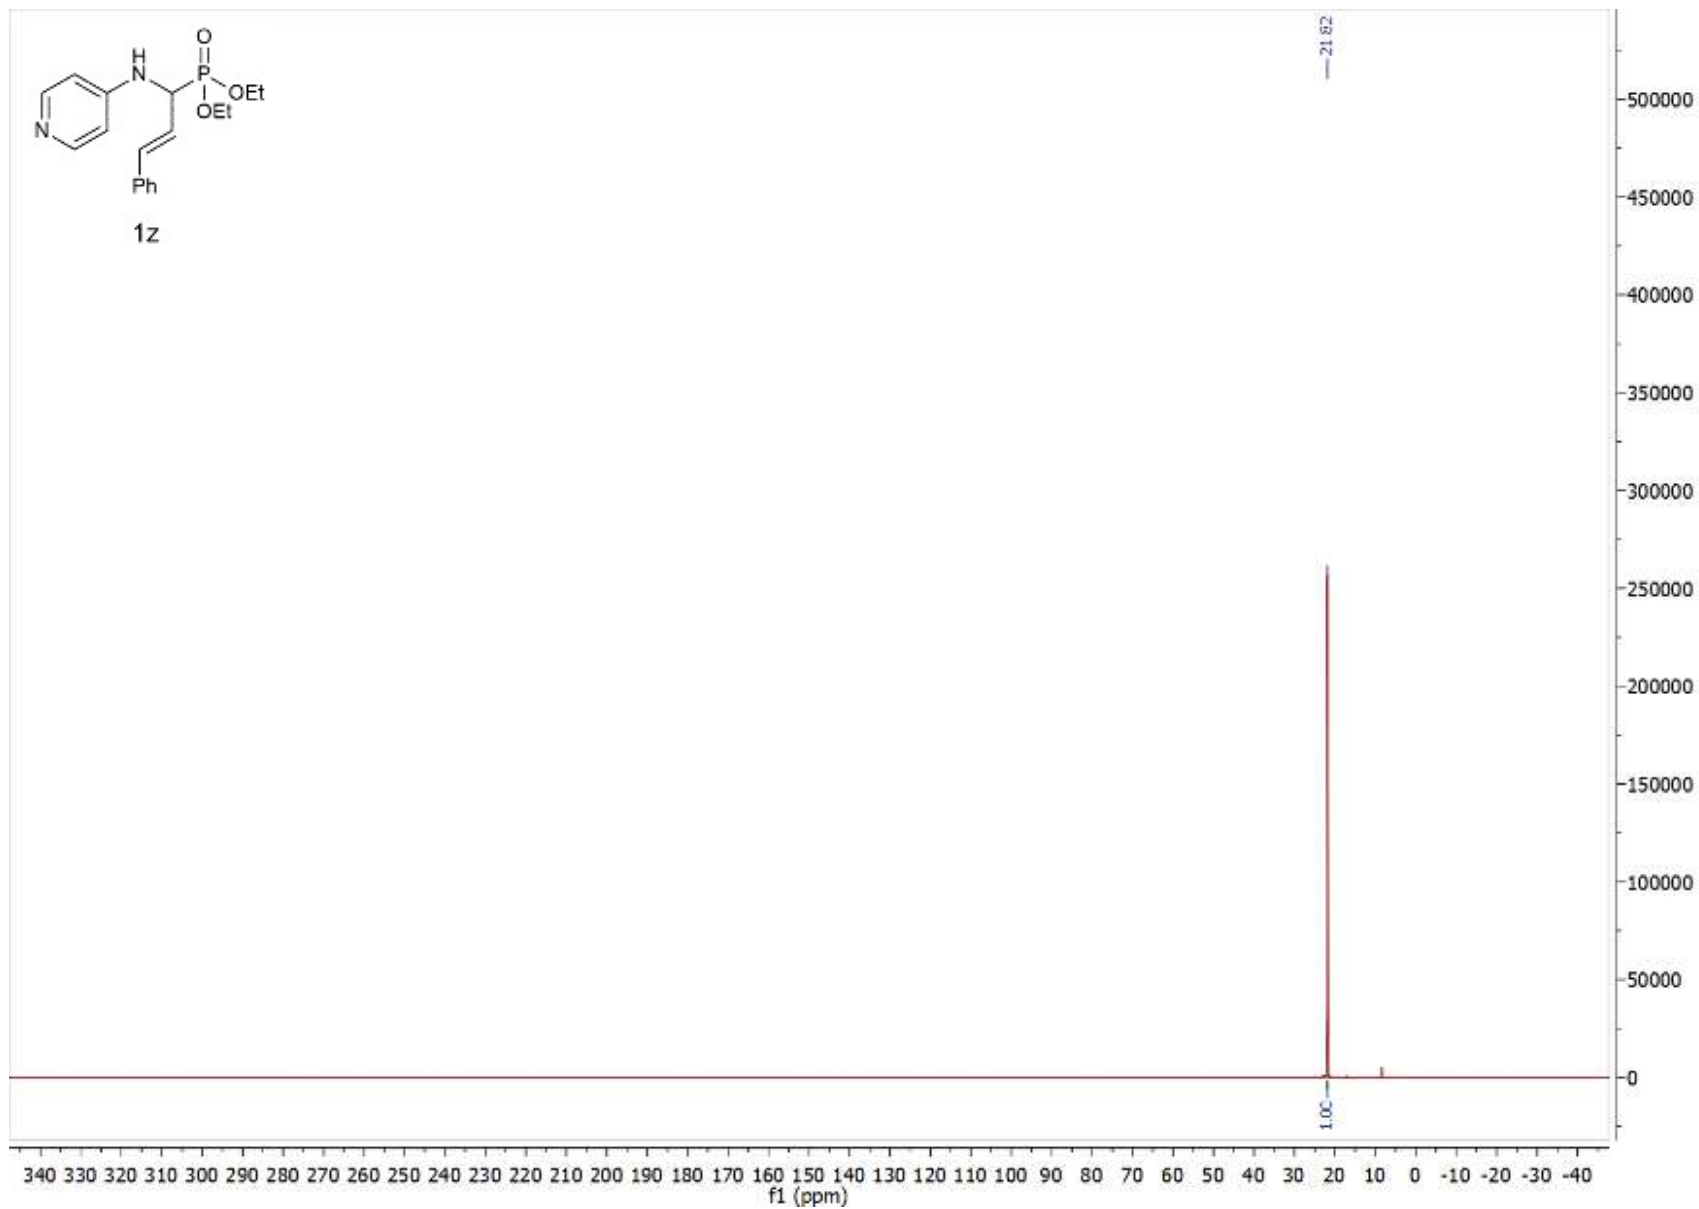

Figure S75:  $^{31}\text{P}$  NMR Spectra of **1z**

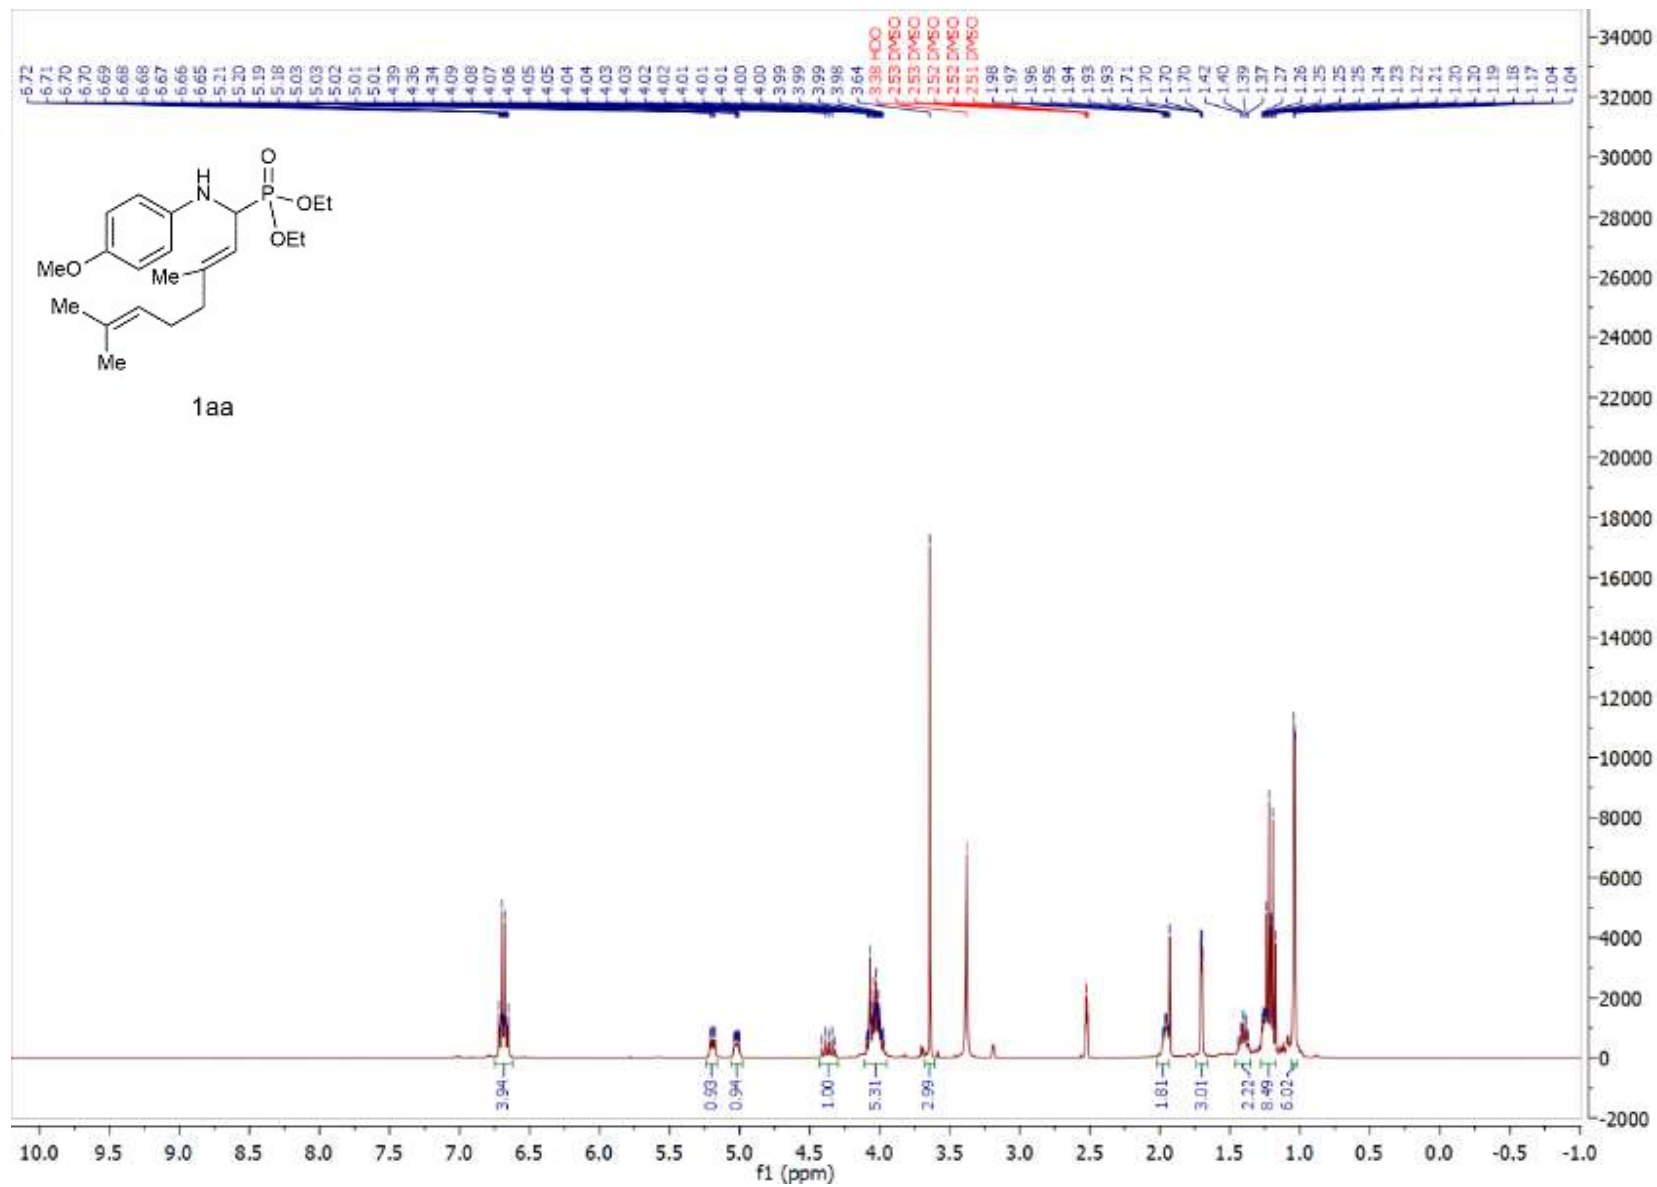

Figure S76: <sup>1</sup>H NMR Spectra of 1aa

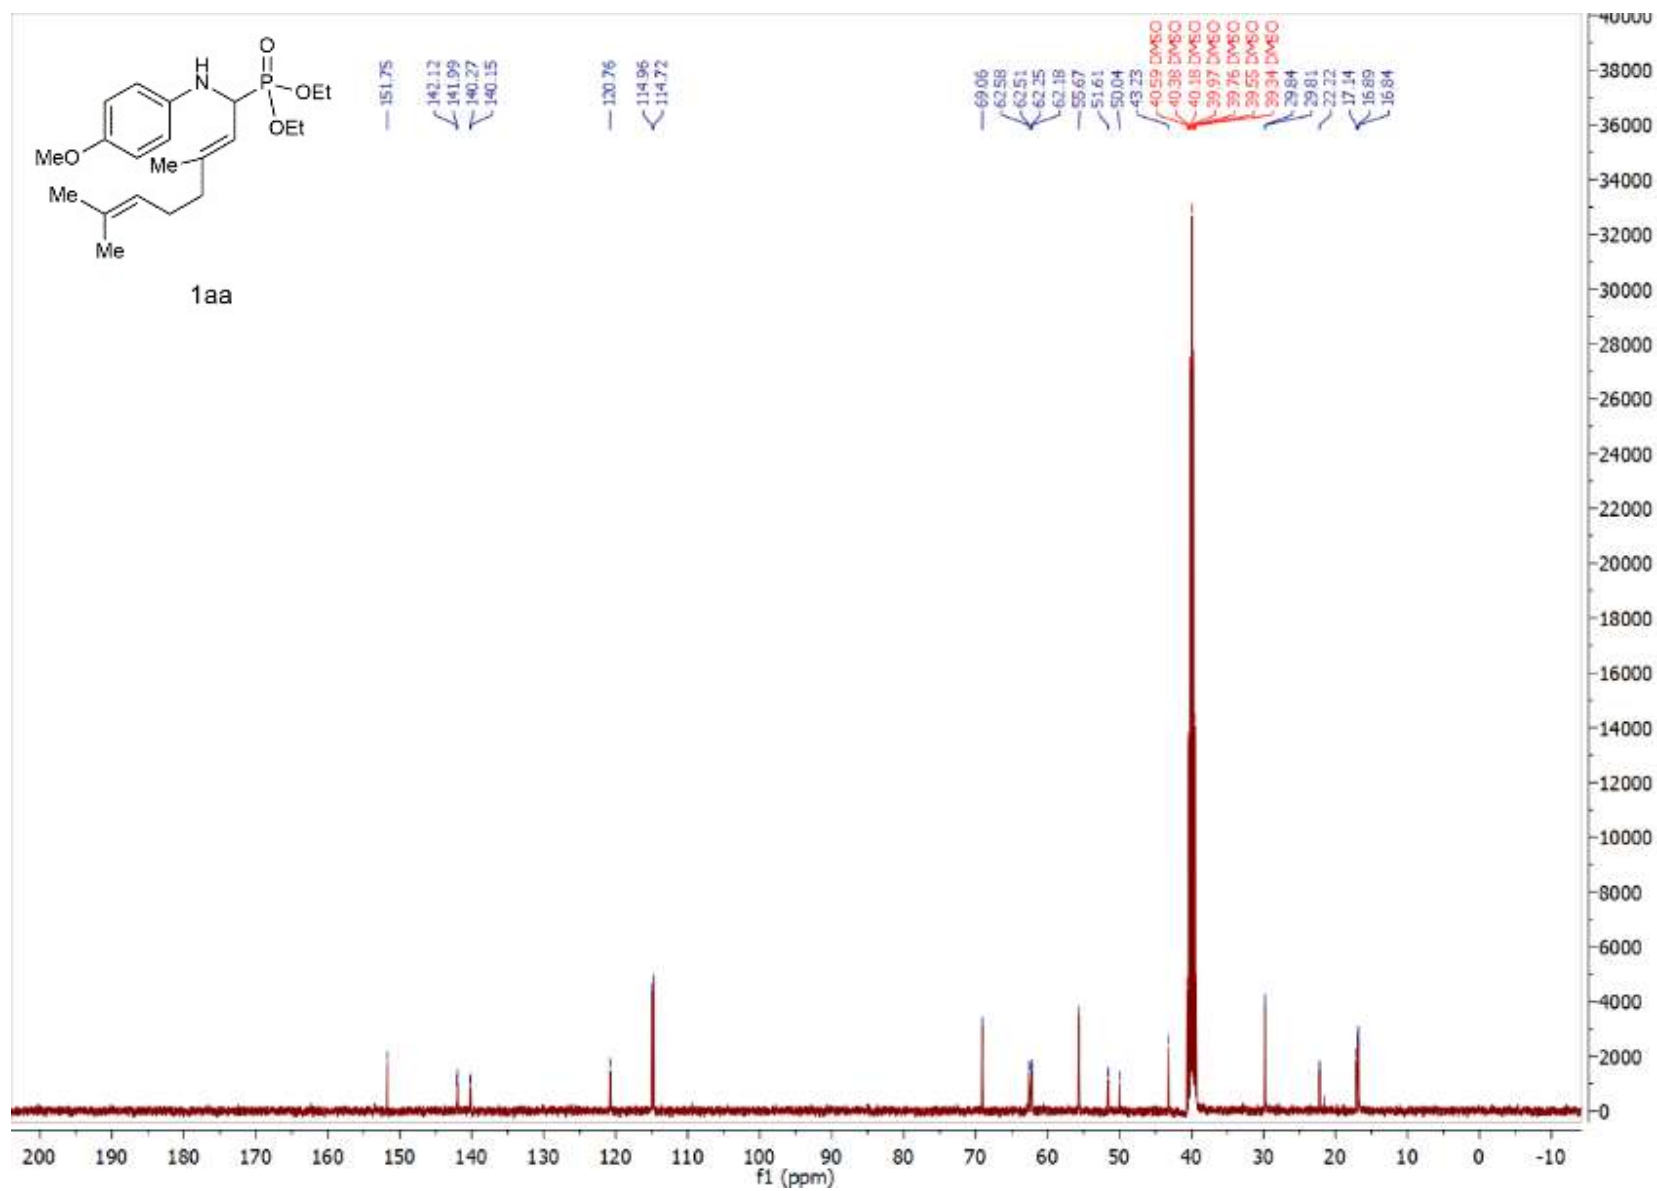

Figure S77: <sup>13</sup>C NMR Spectra of 1aa

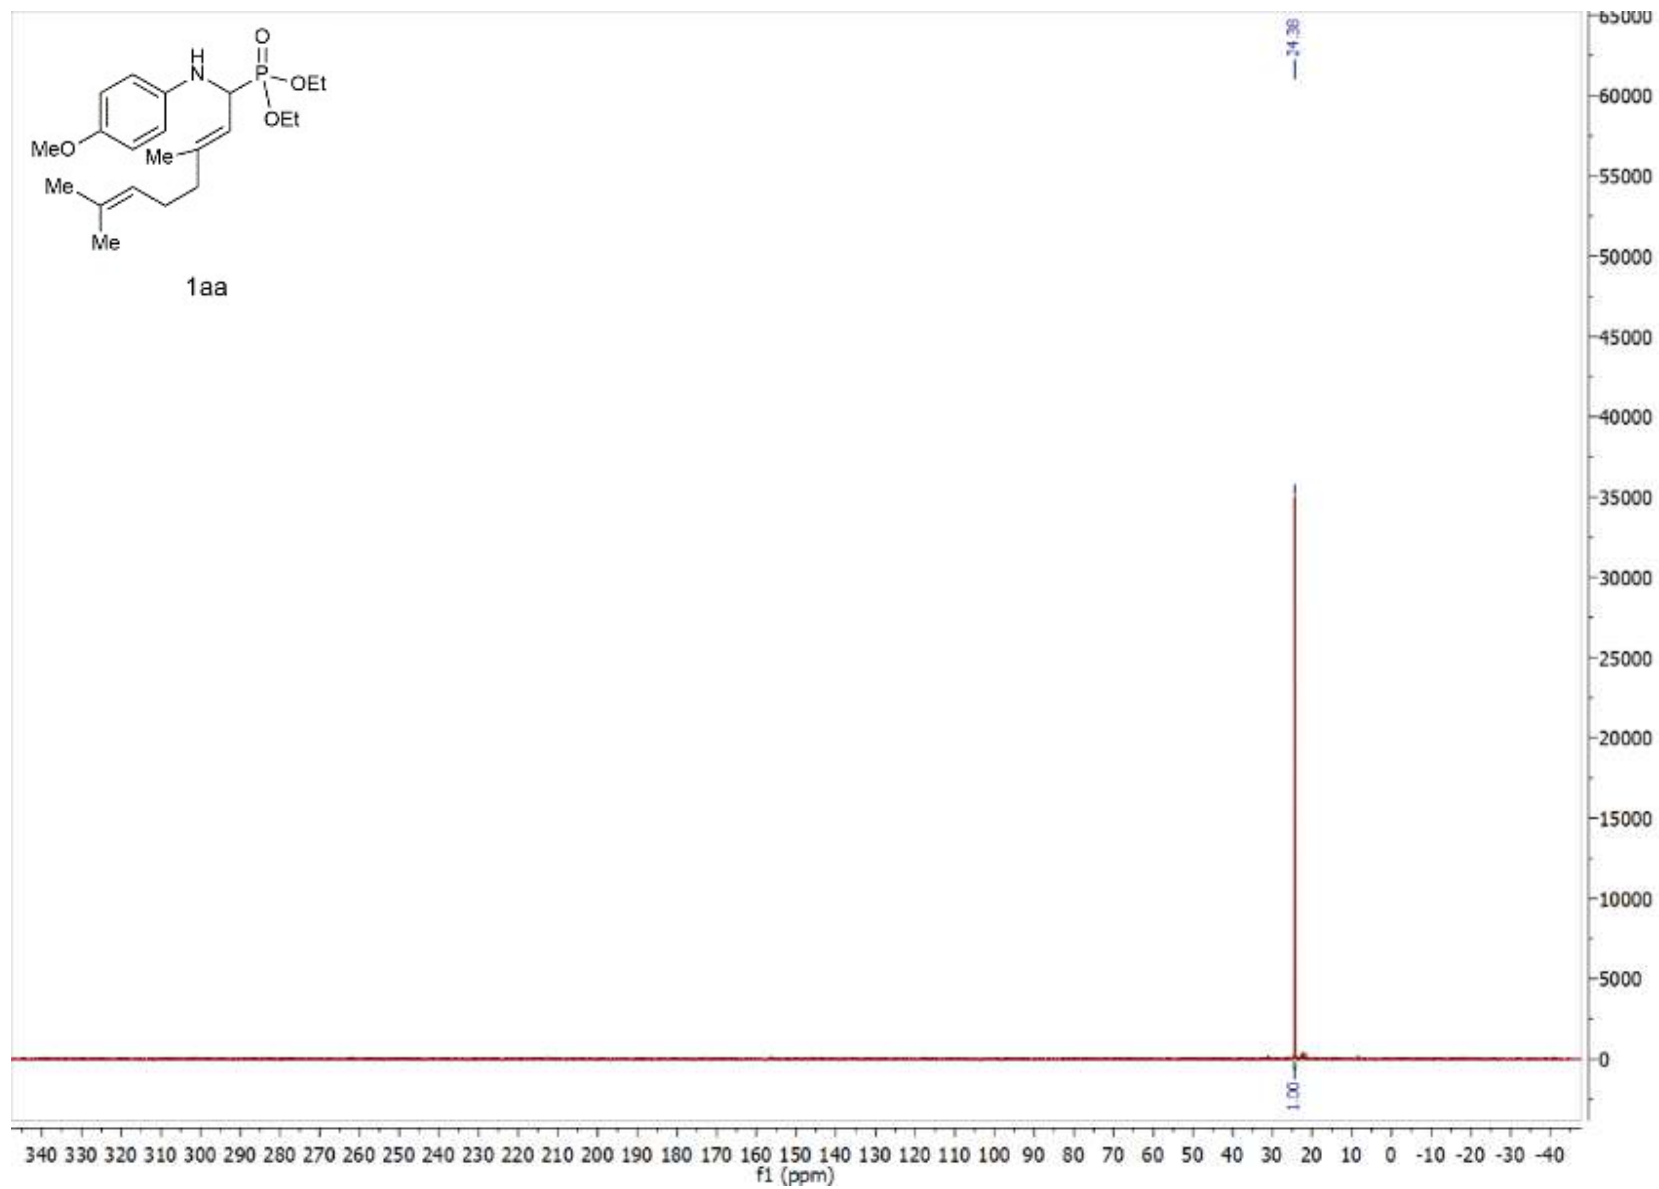

Figure S78:  $^{31}\text{P}$  NMR Spectra of 1aa

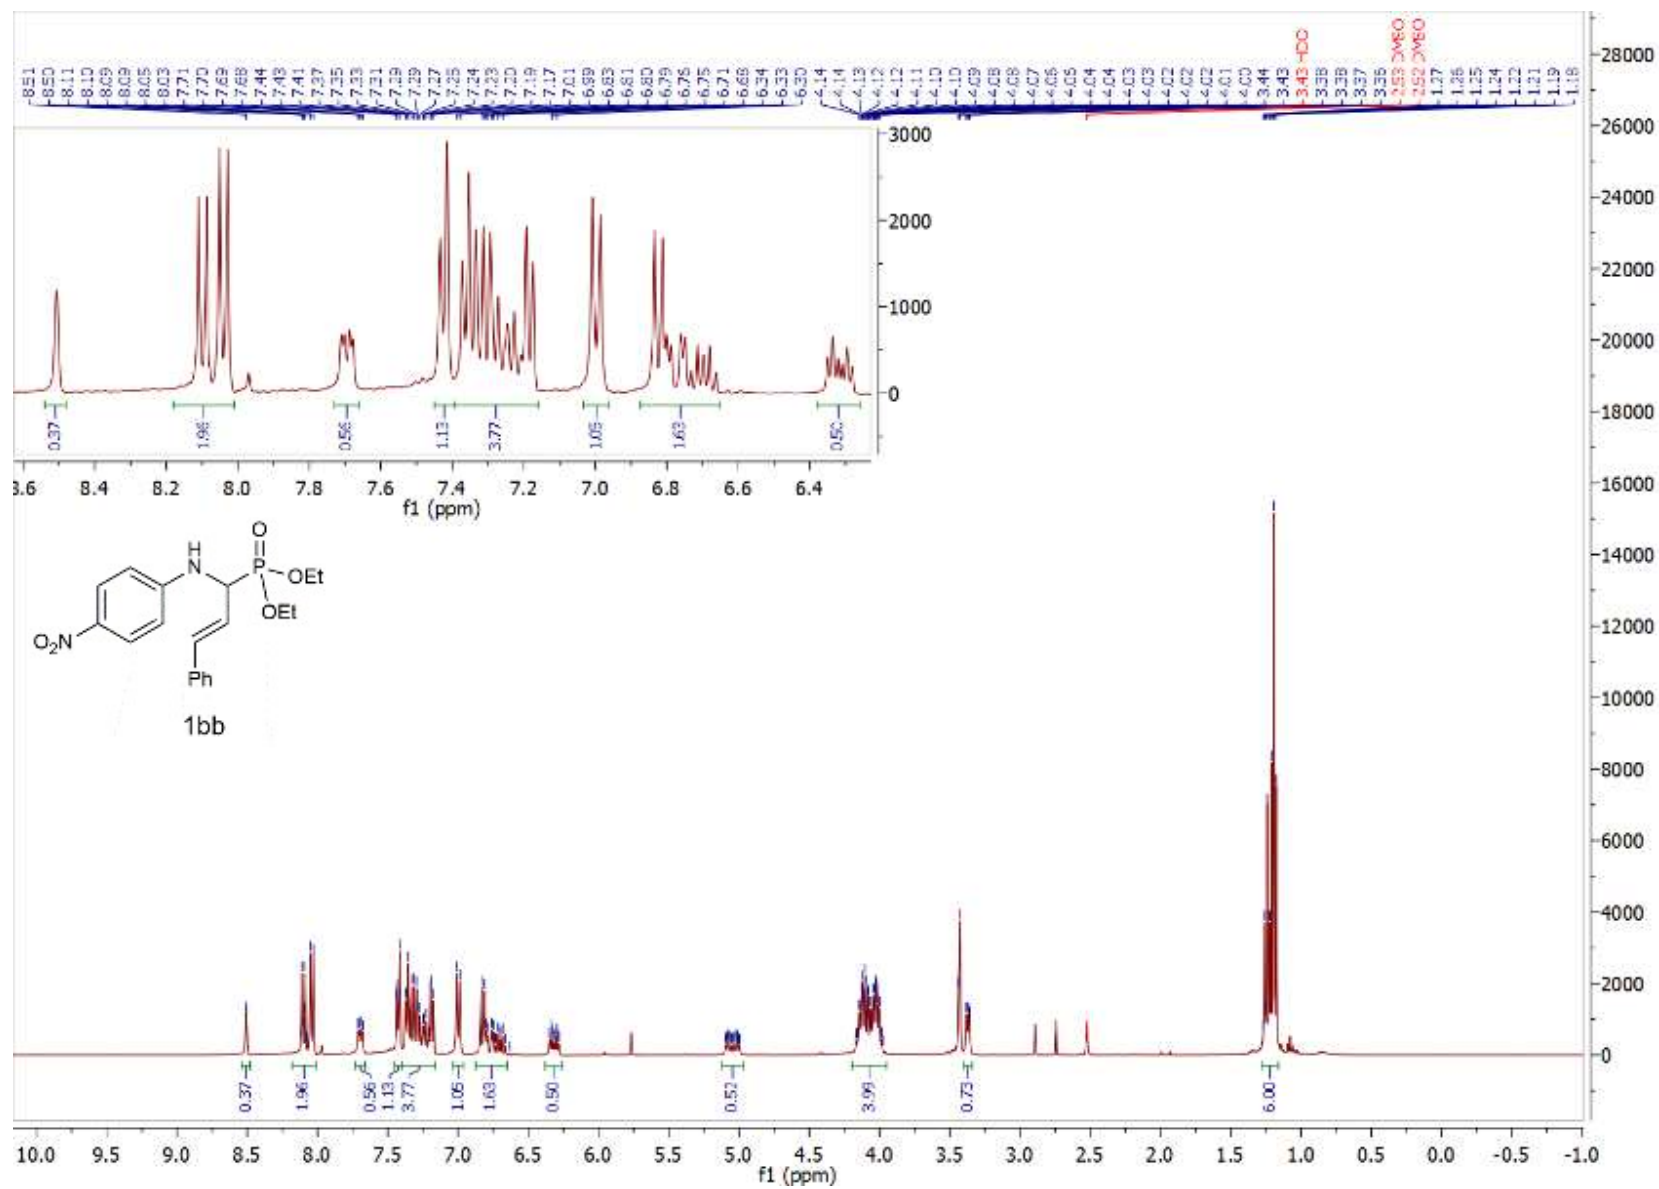



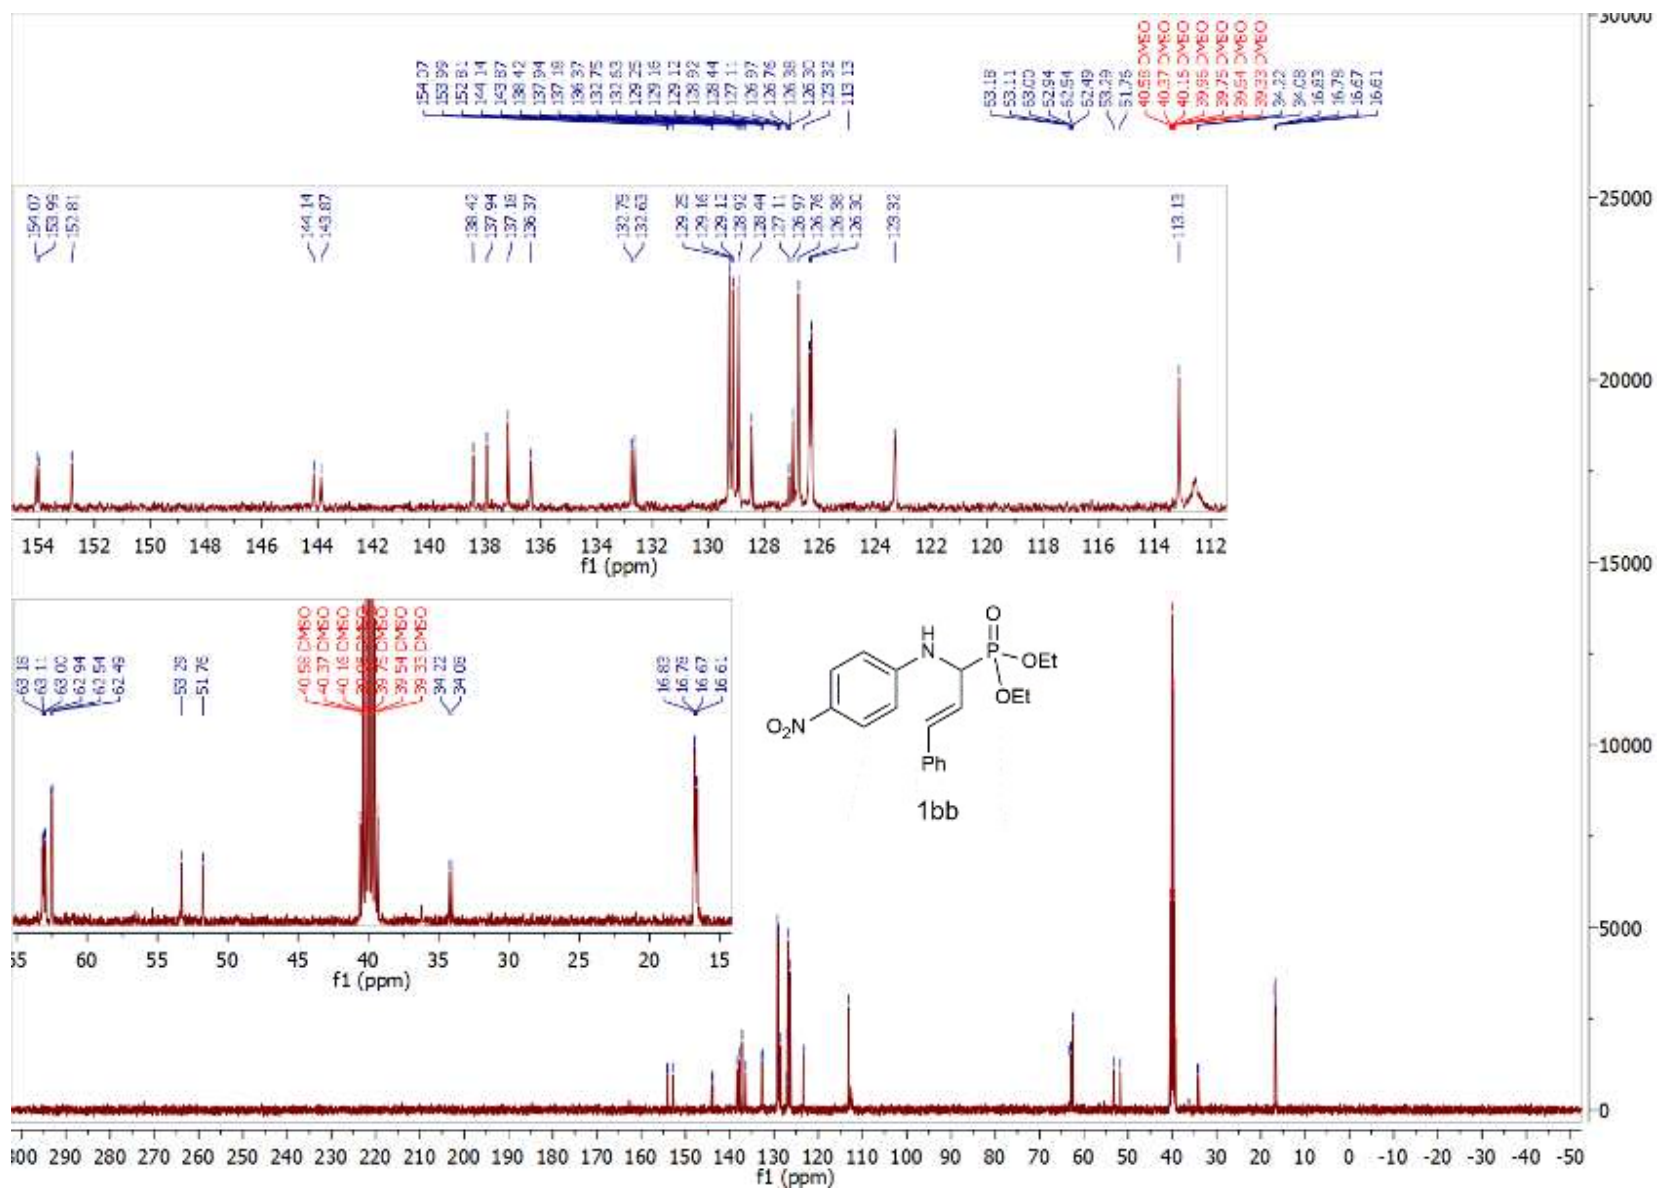

Figure S80:  $^{13}\text{C}$  NMR Spectra of 1bb

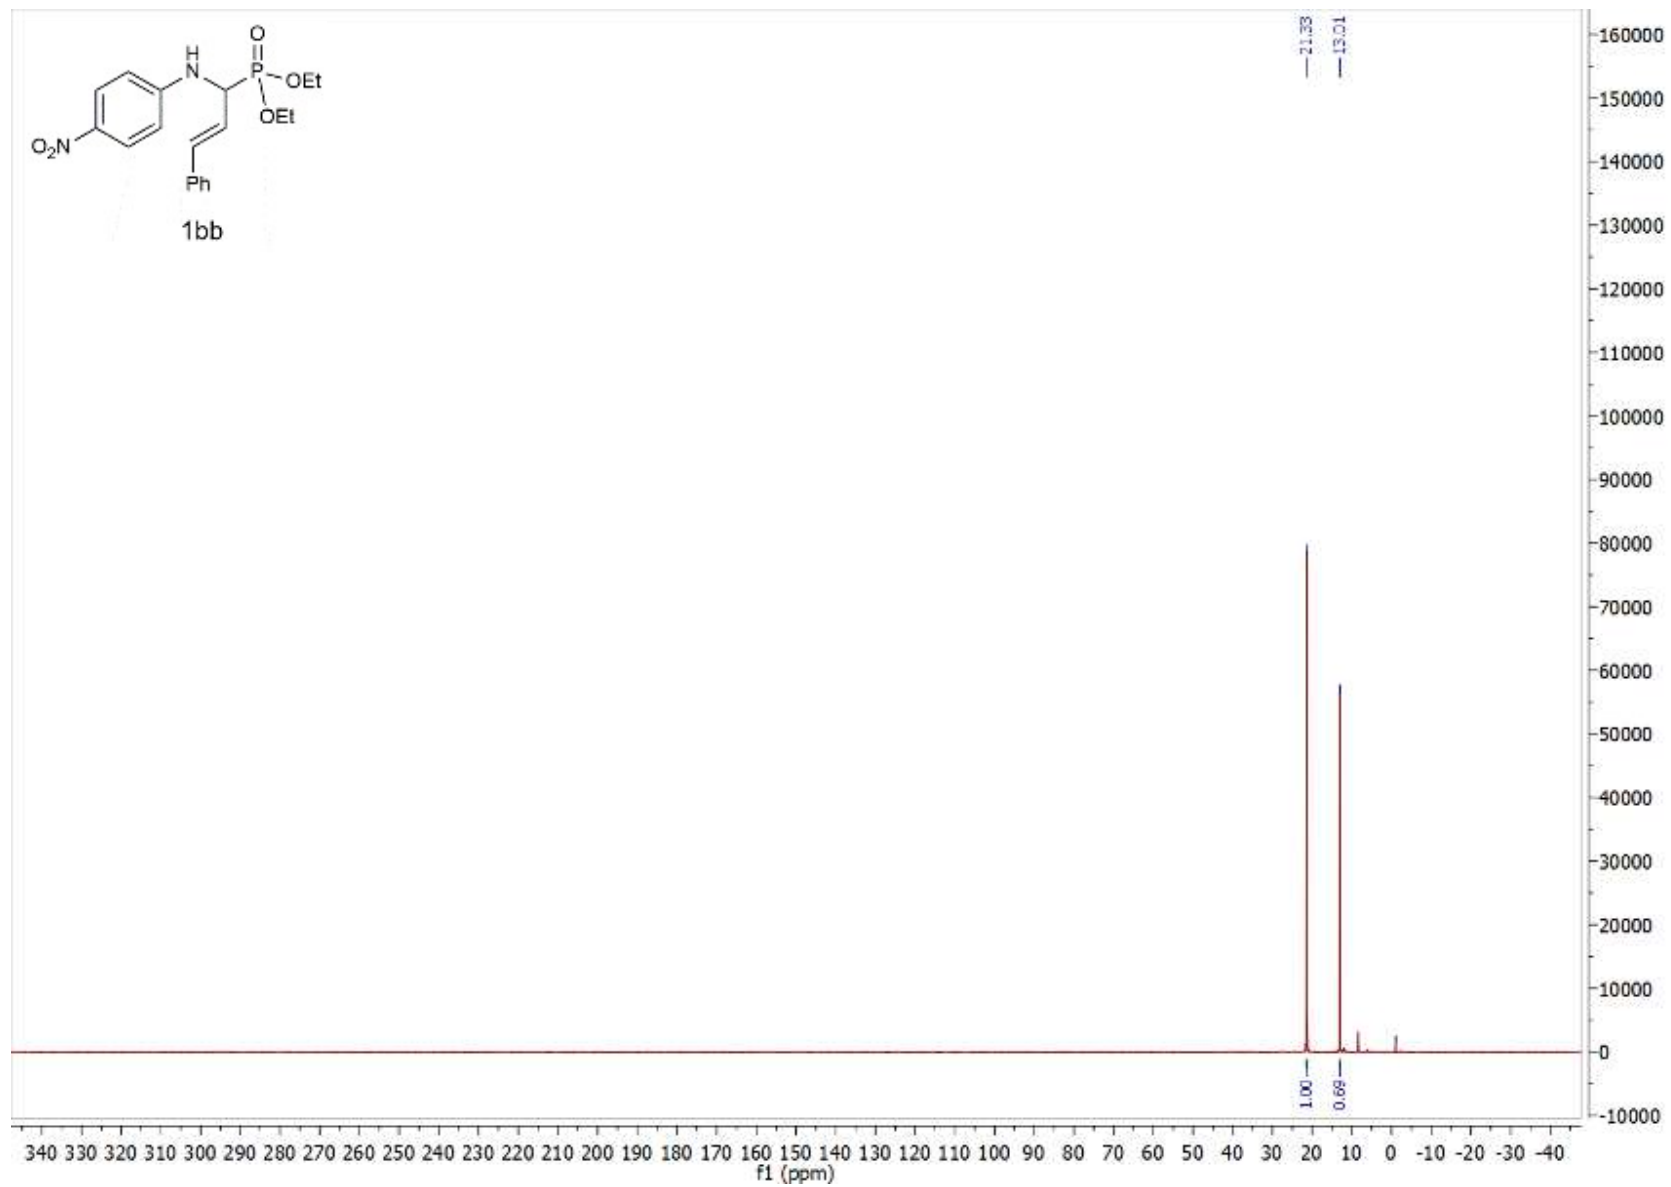

Figure S81: <sup>31</sup>P NMR Spectra of 1bb

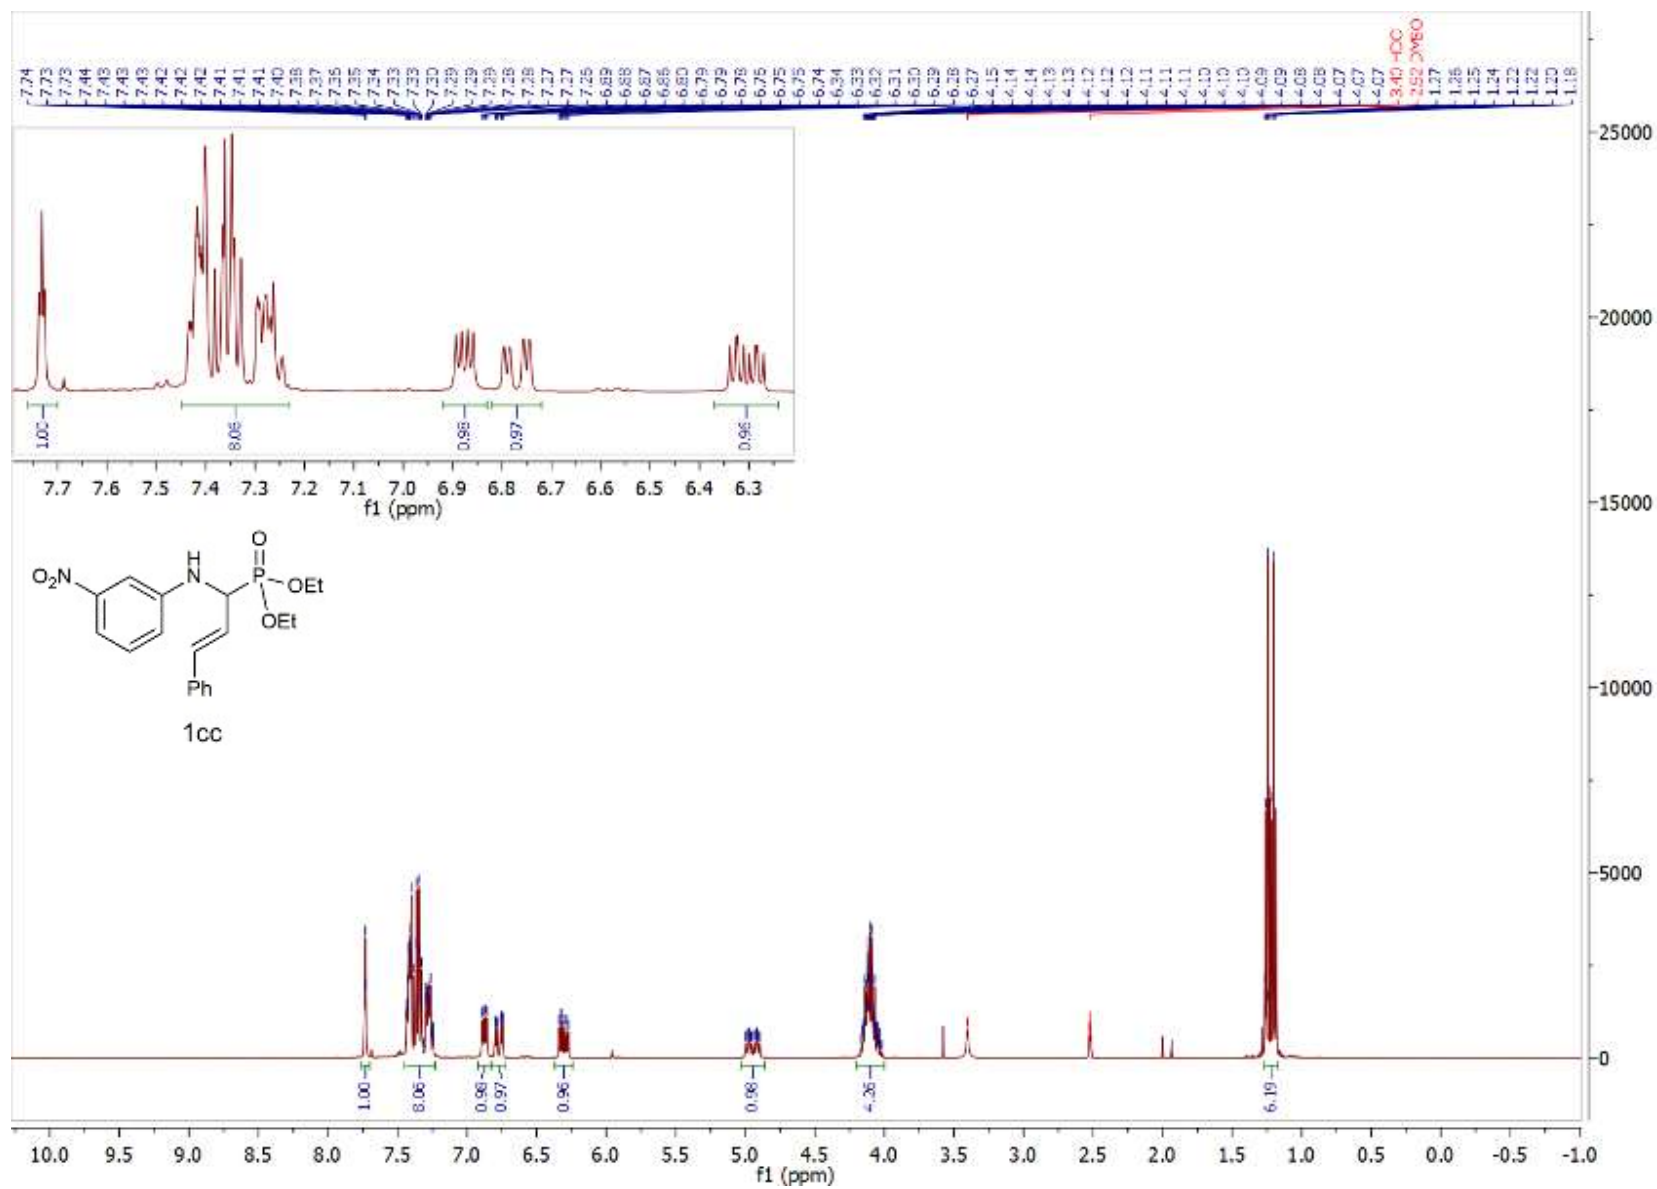

Figure S82:  $^1\text{H}$  NMR Spectra of **1cc**

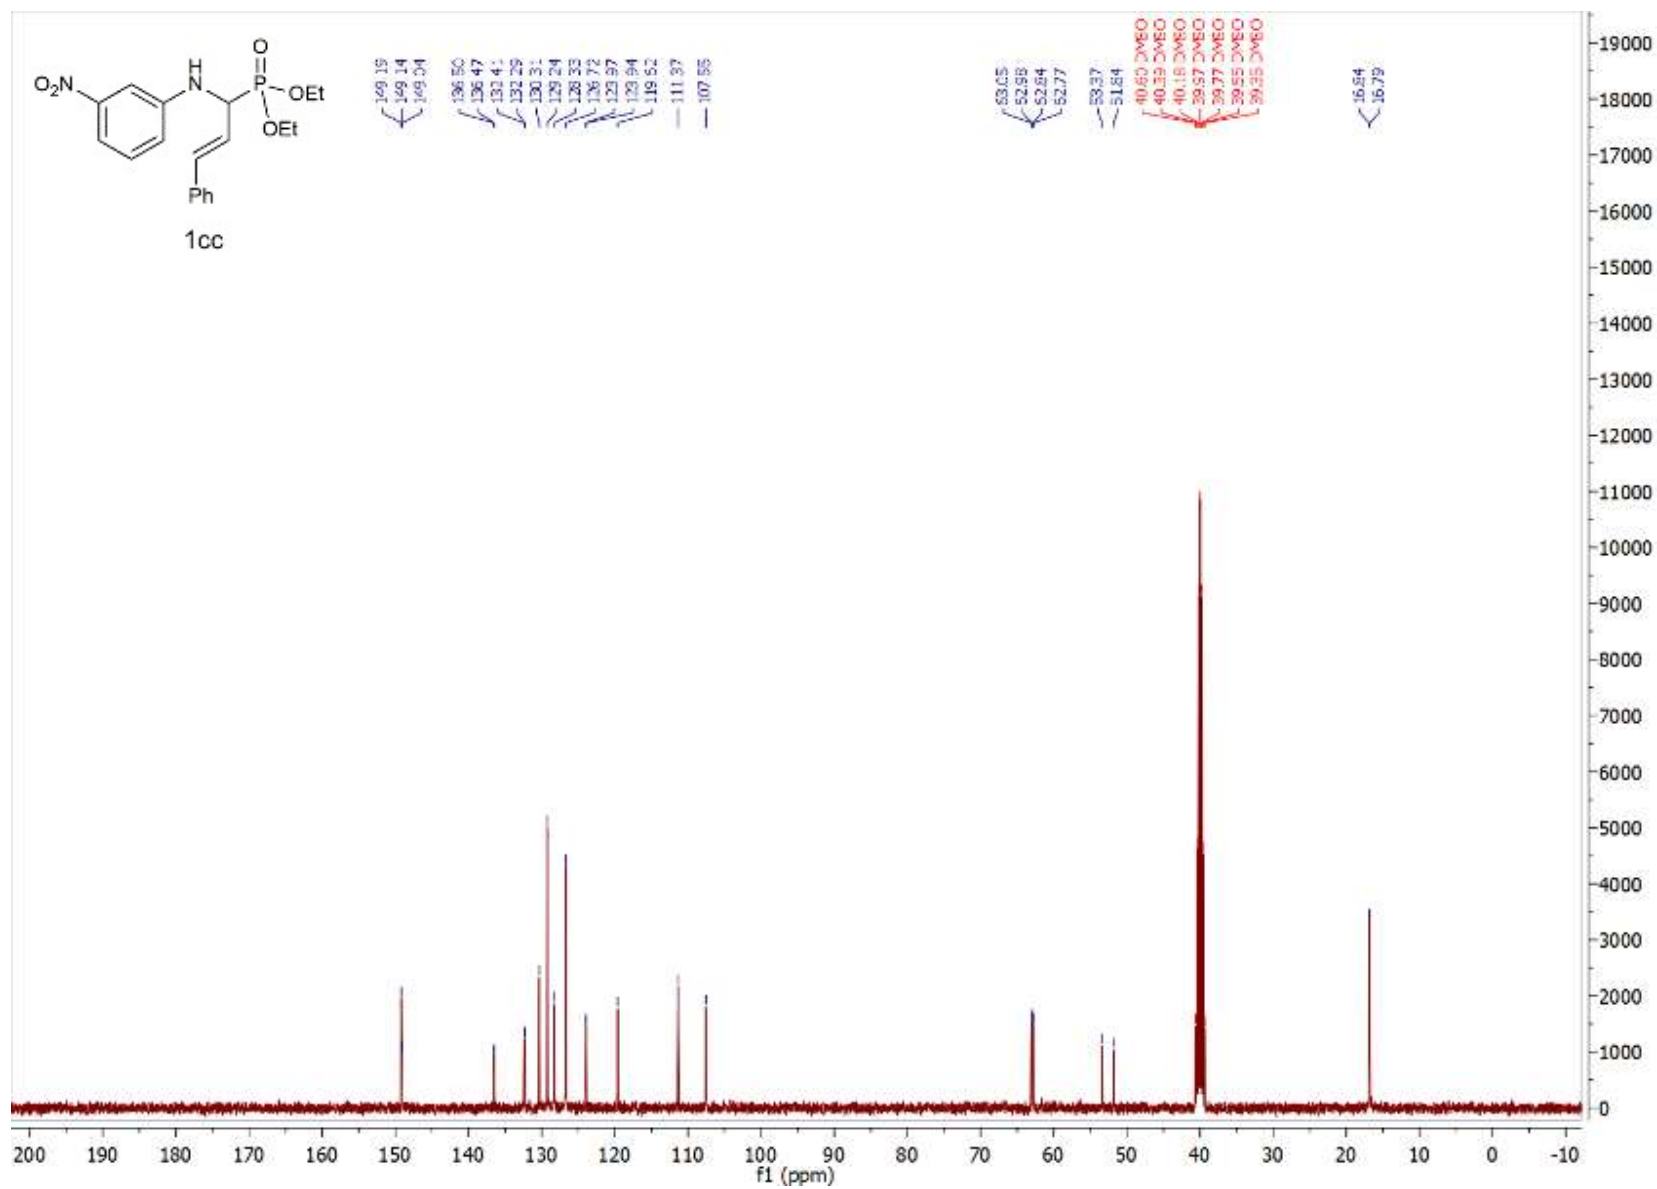

Figure S83:  $^{13}\text{C}$  NMR Spectra of 1cc

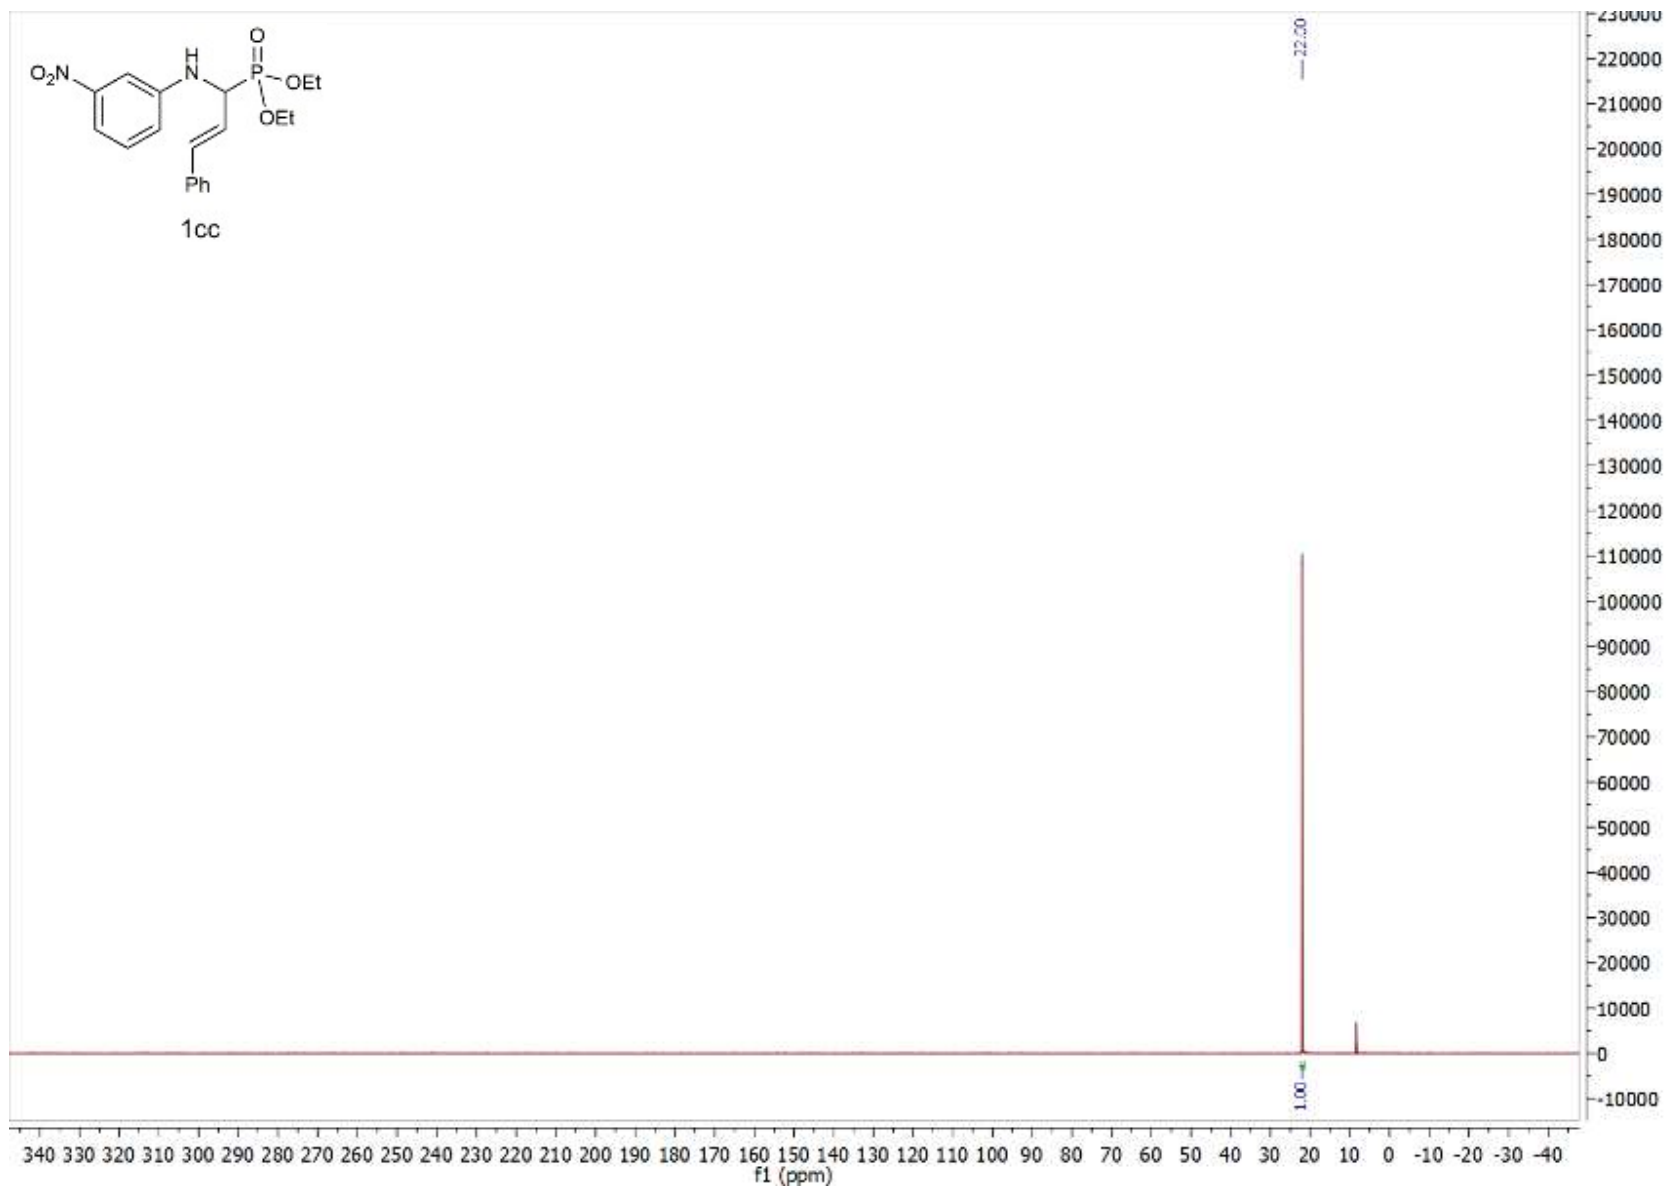

Figure S84:  $^{31}\text{P}$  NMR Spectra of 1cc

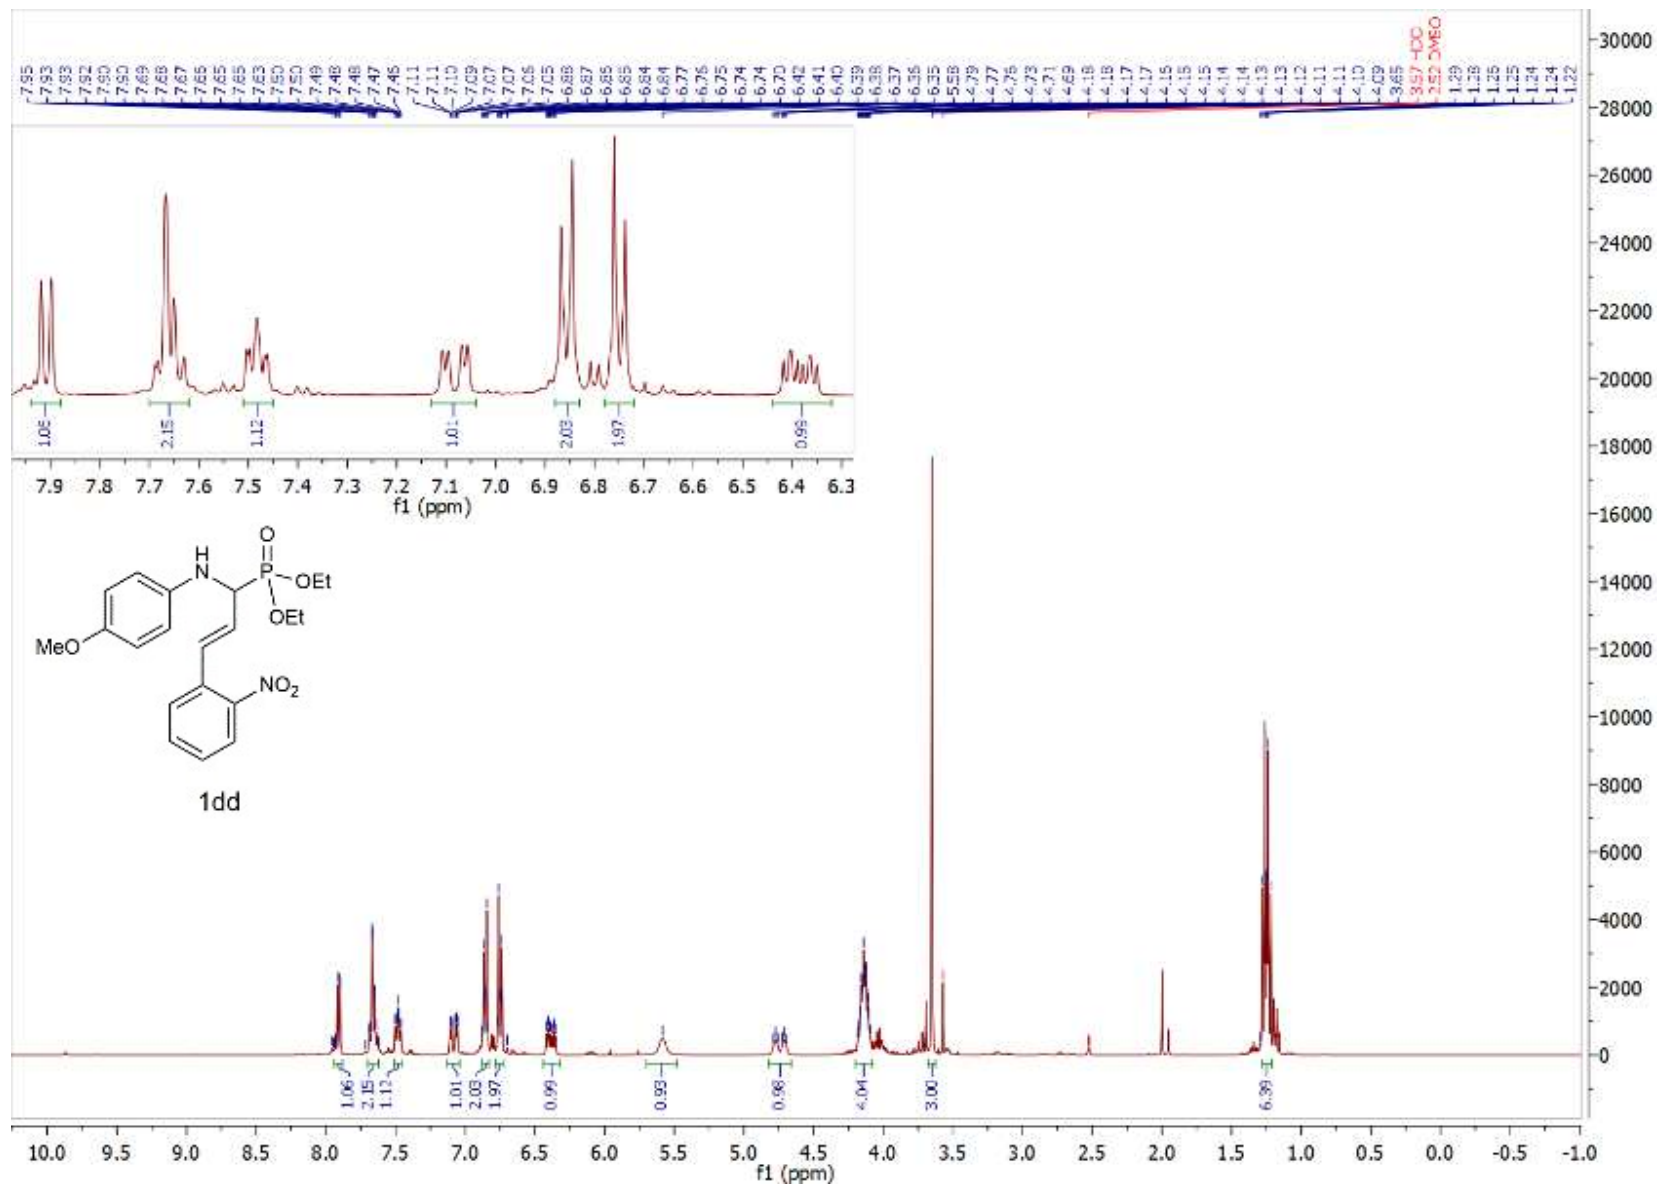

Figure S85: <sup>1</sup>H NMR Spectra of 1dd

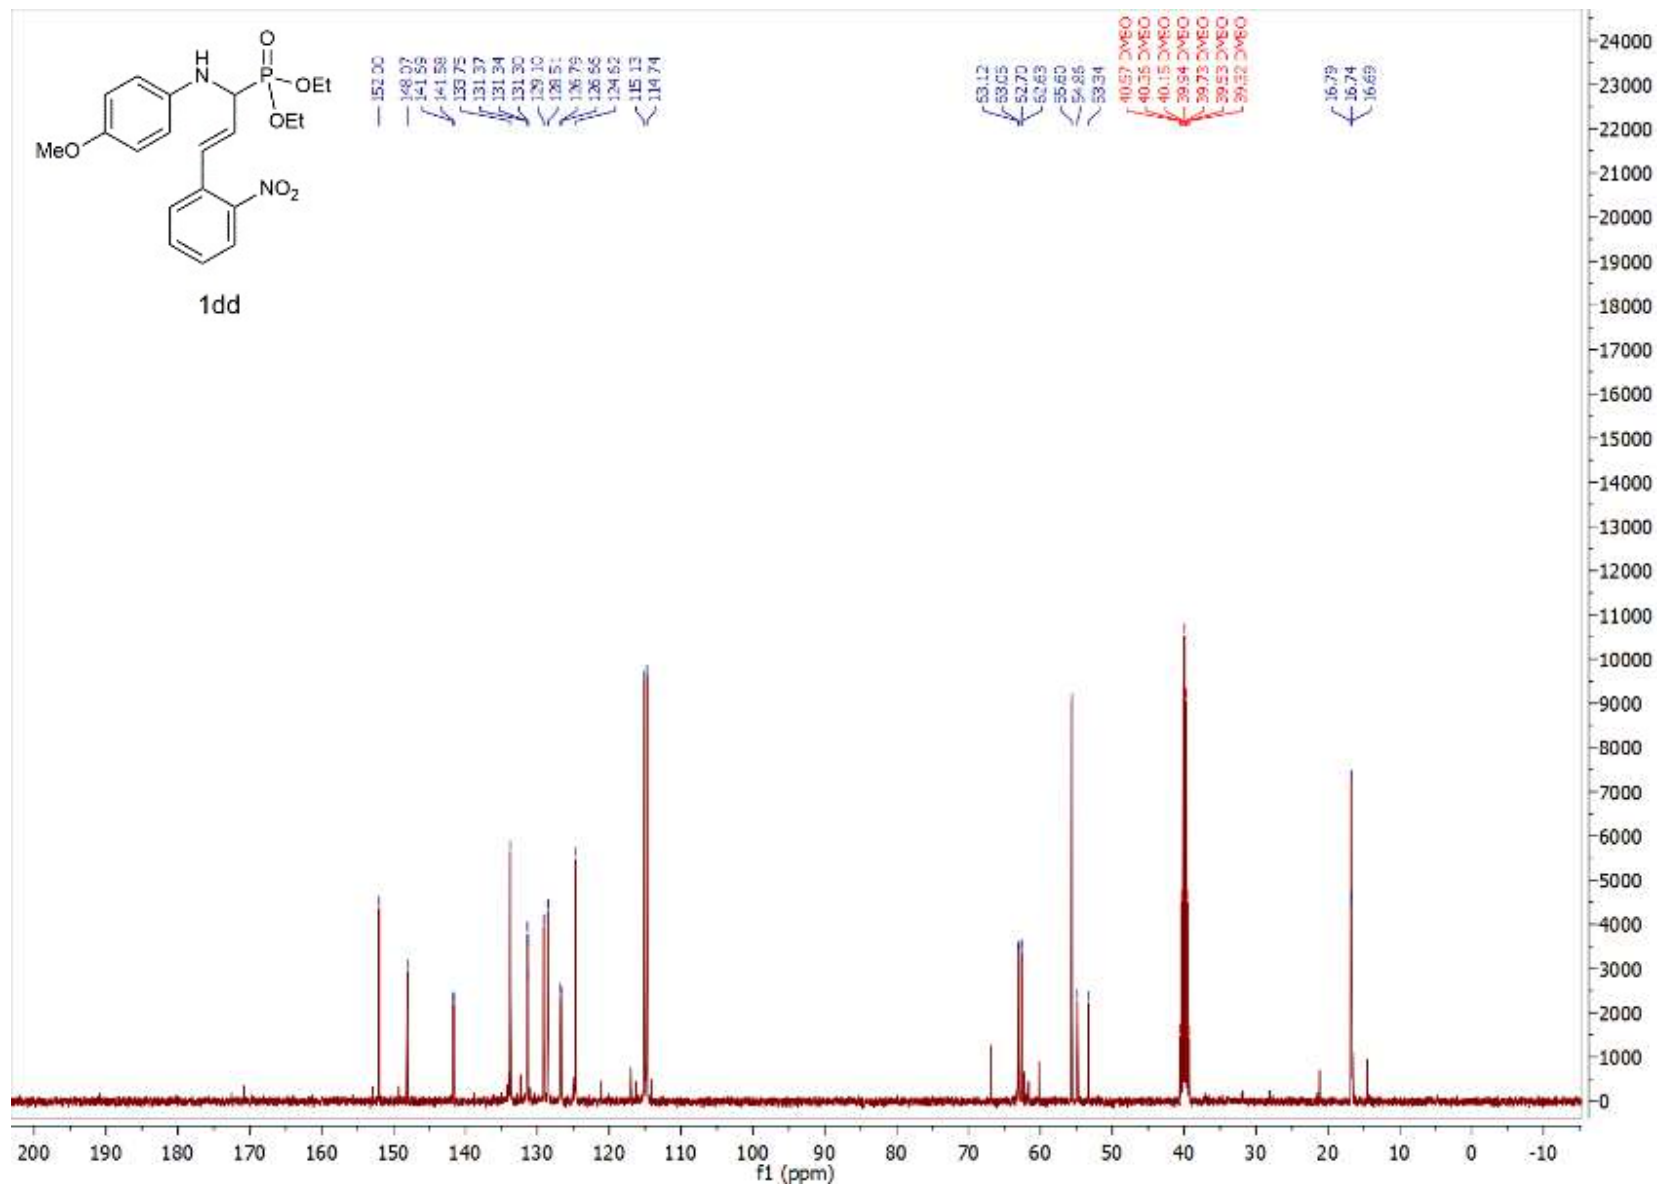

Figure S86: <sup>13</sup>C NMR Spectra of 1dd

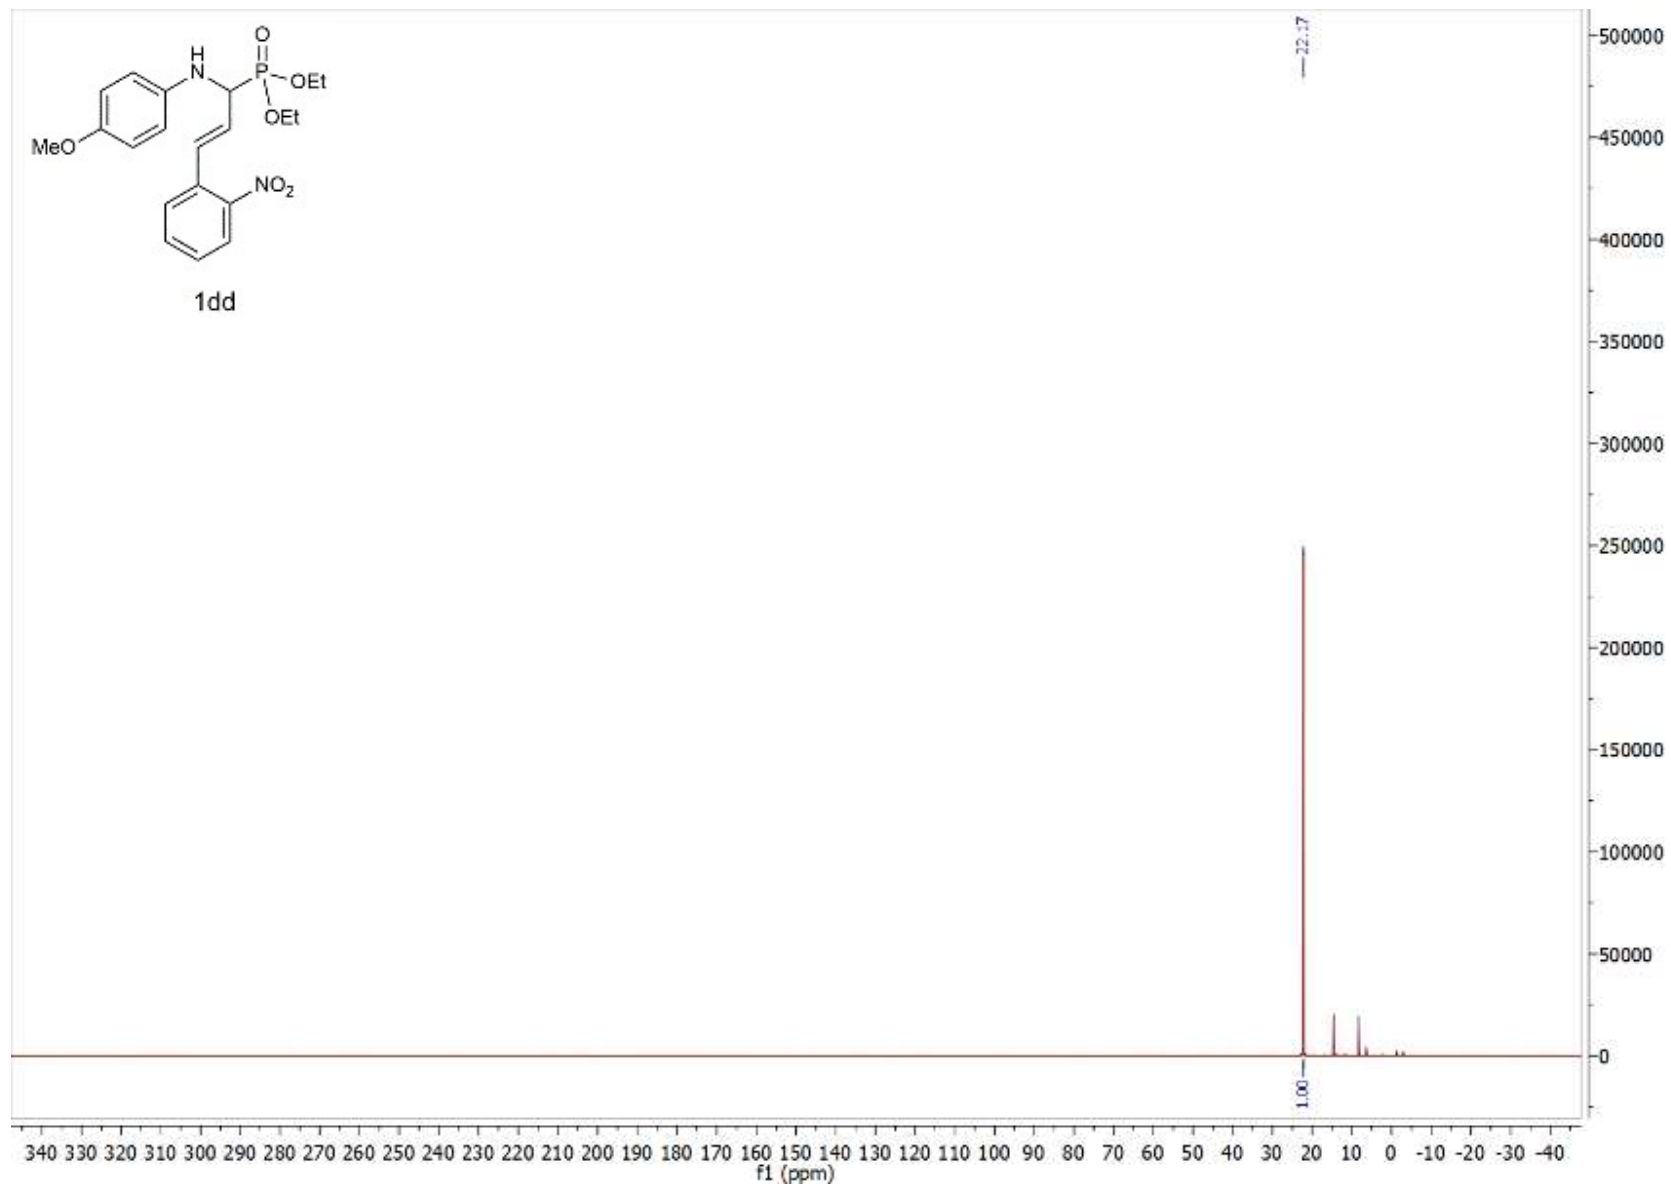

Figure S87:  $^{31}\text{P}$  NMR Spectra of 1dd



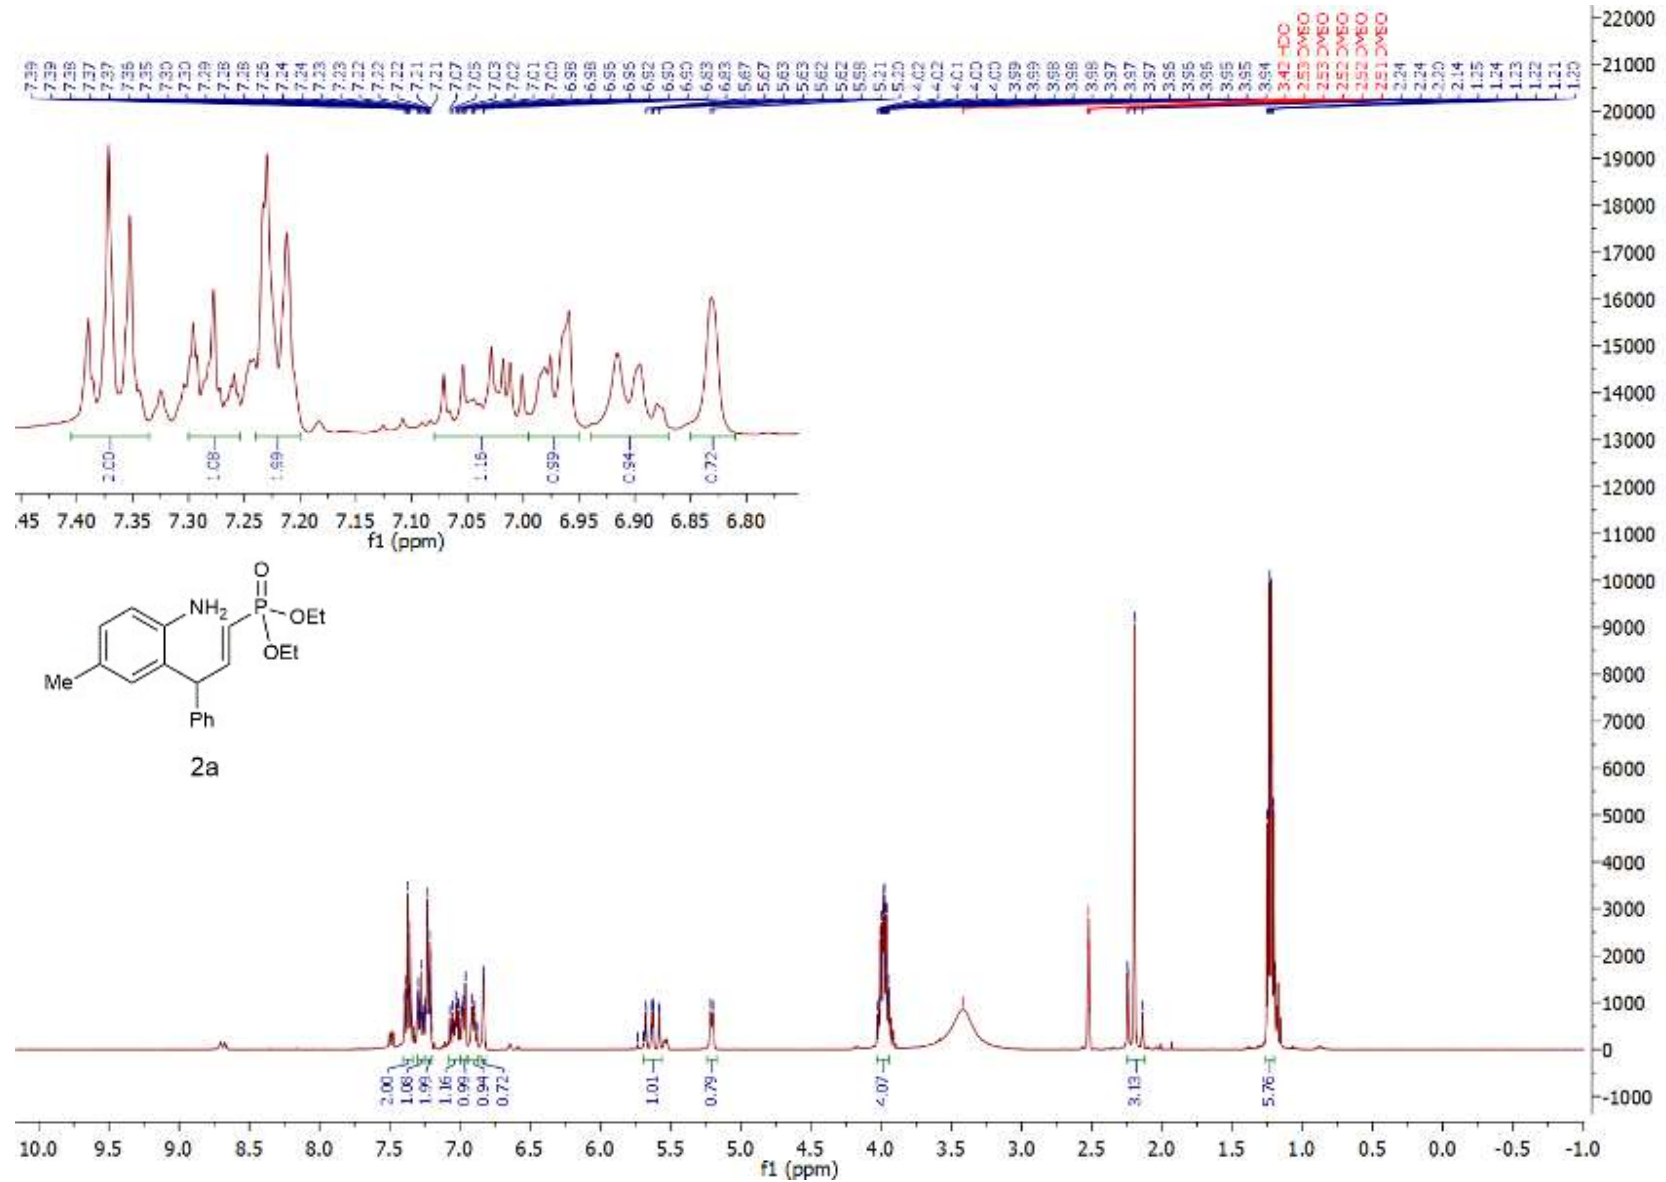

Figure S88:  $^1\text{H}$  NMR Spectra of 2a

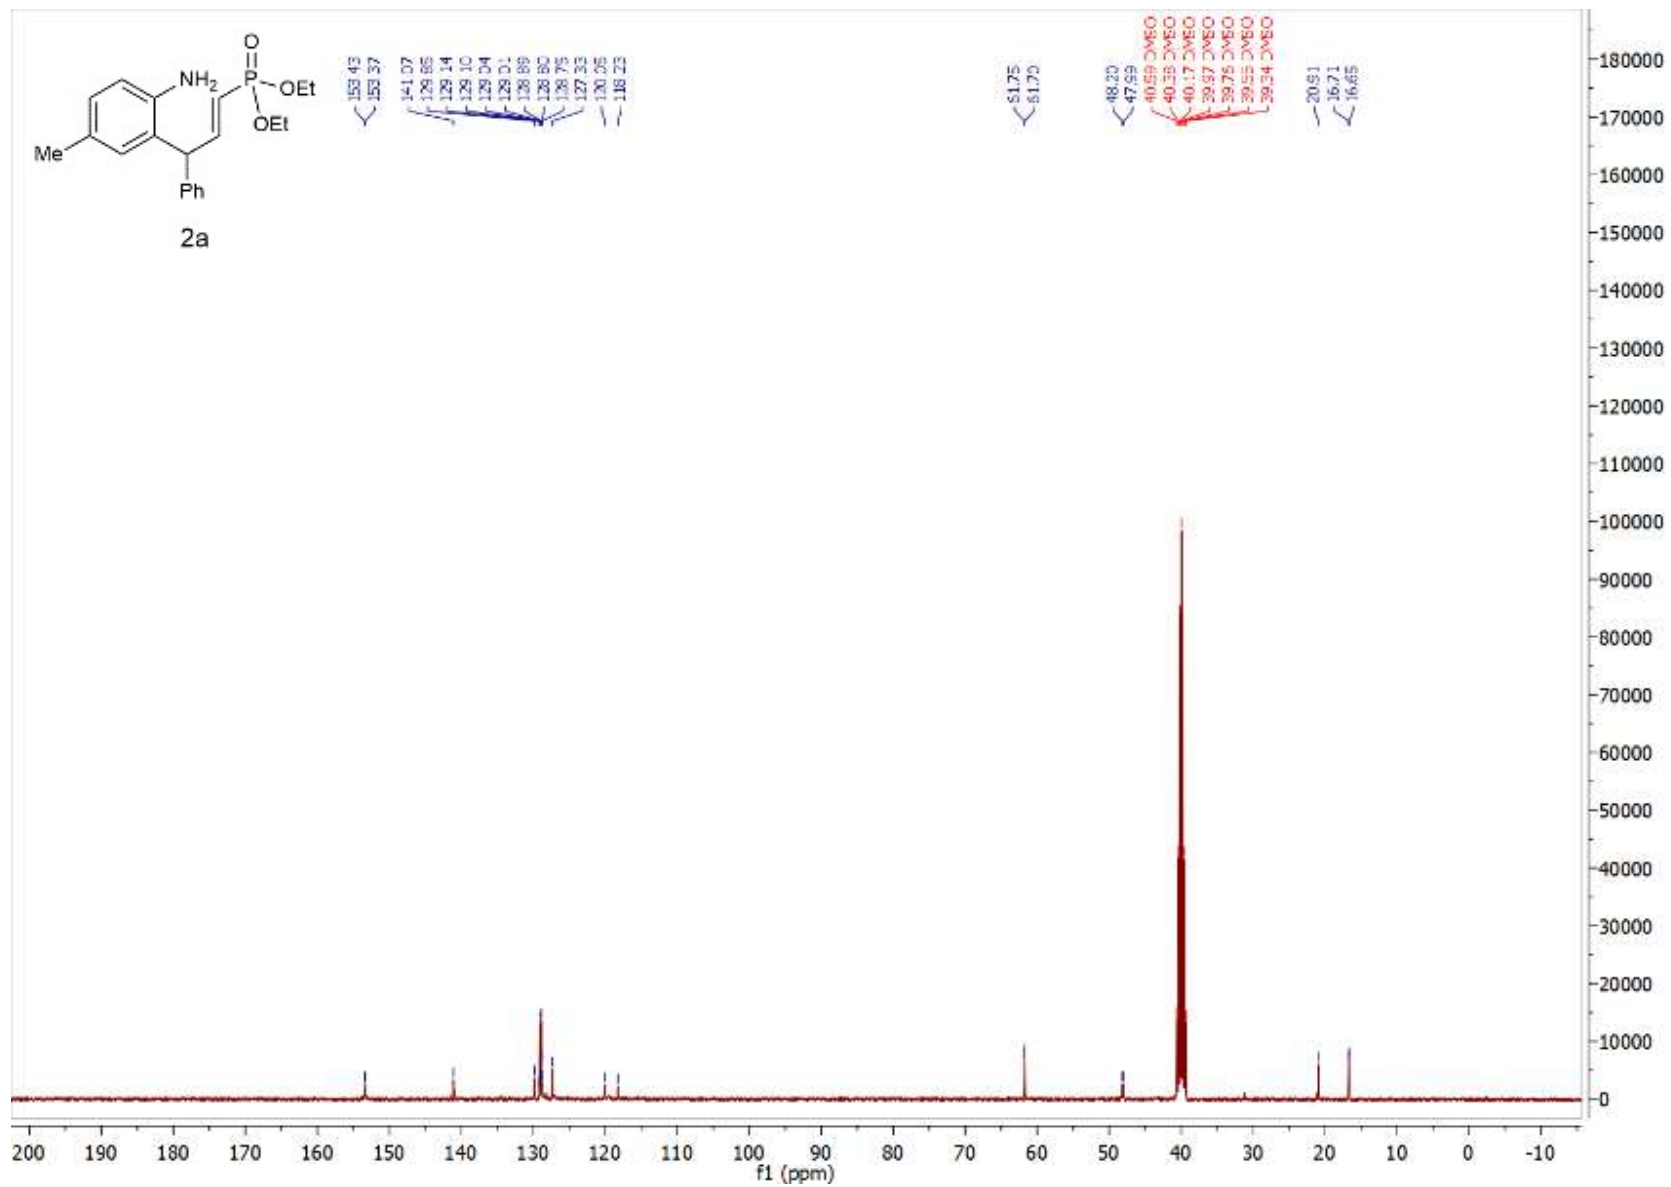

Figure S89: <sup>13</sup>C NMR Spectra of 2a

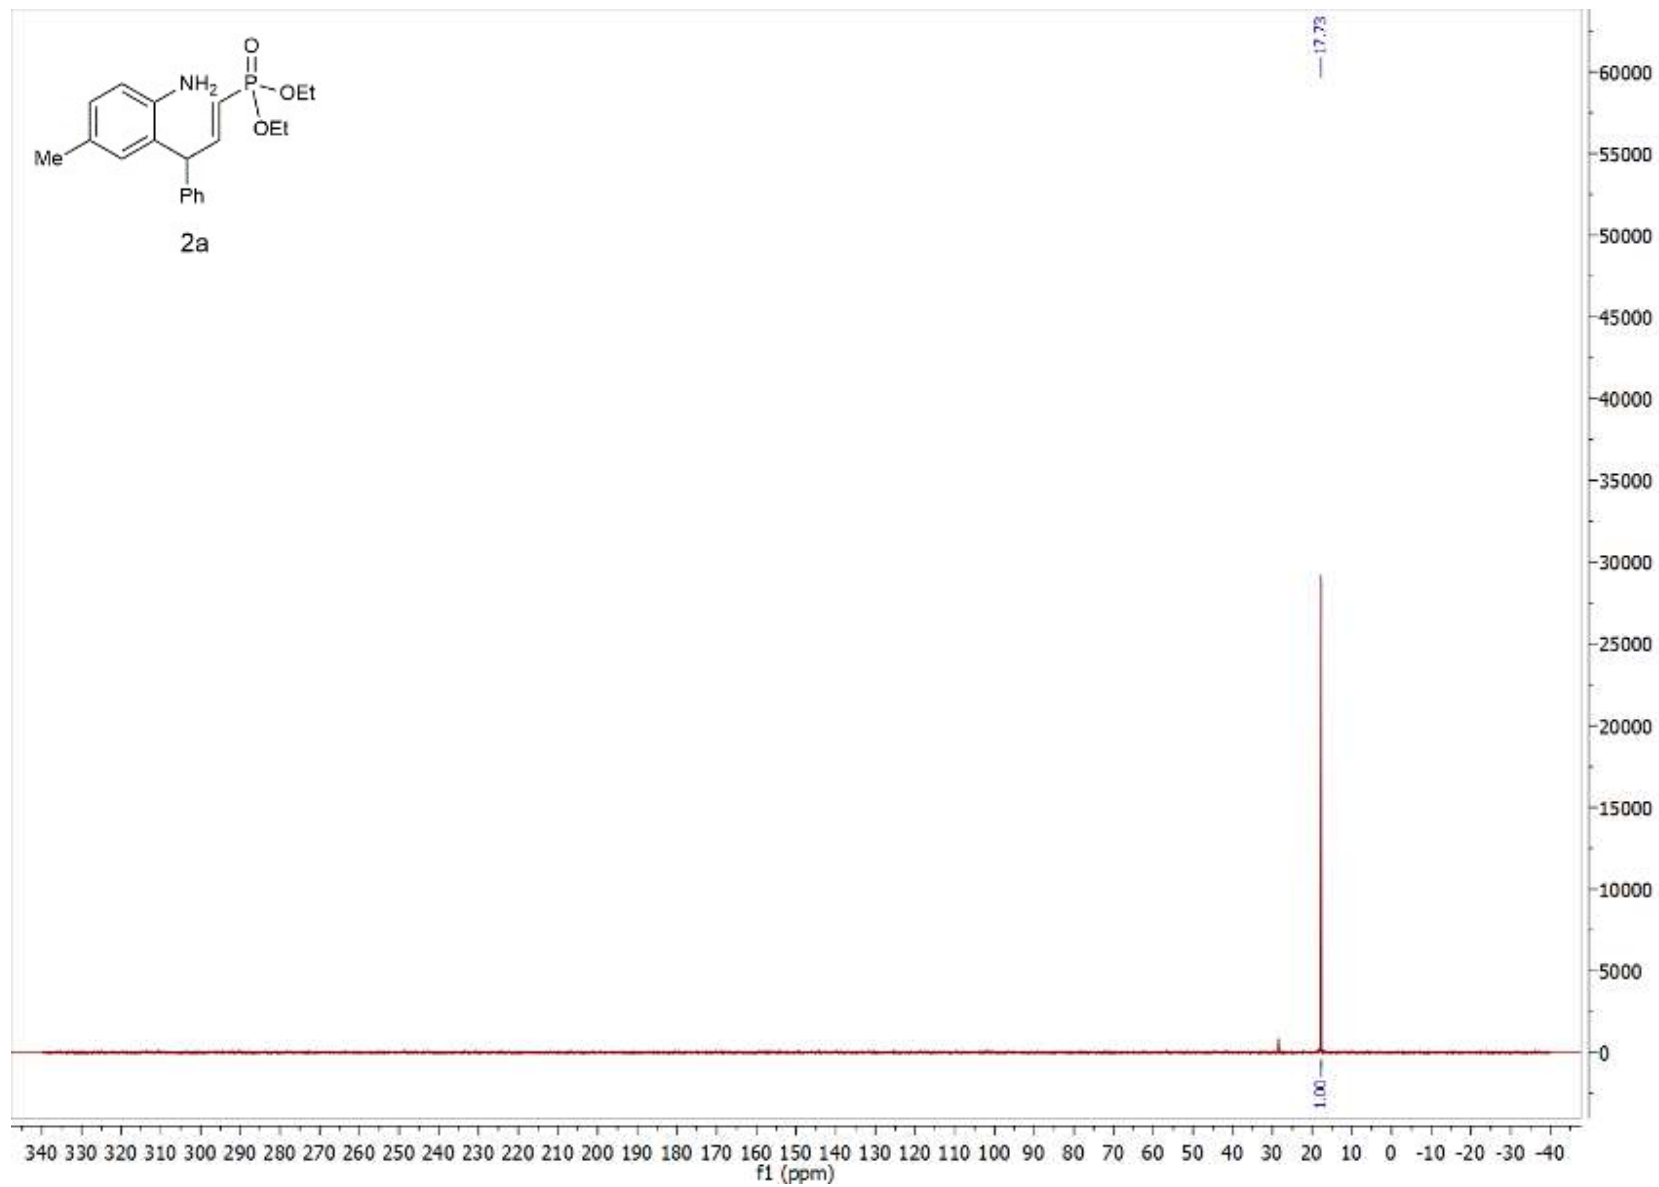

Figure S90:  $^{31}\text{P}$  NMR Spectra of 2a

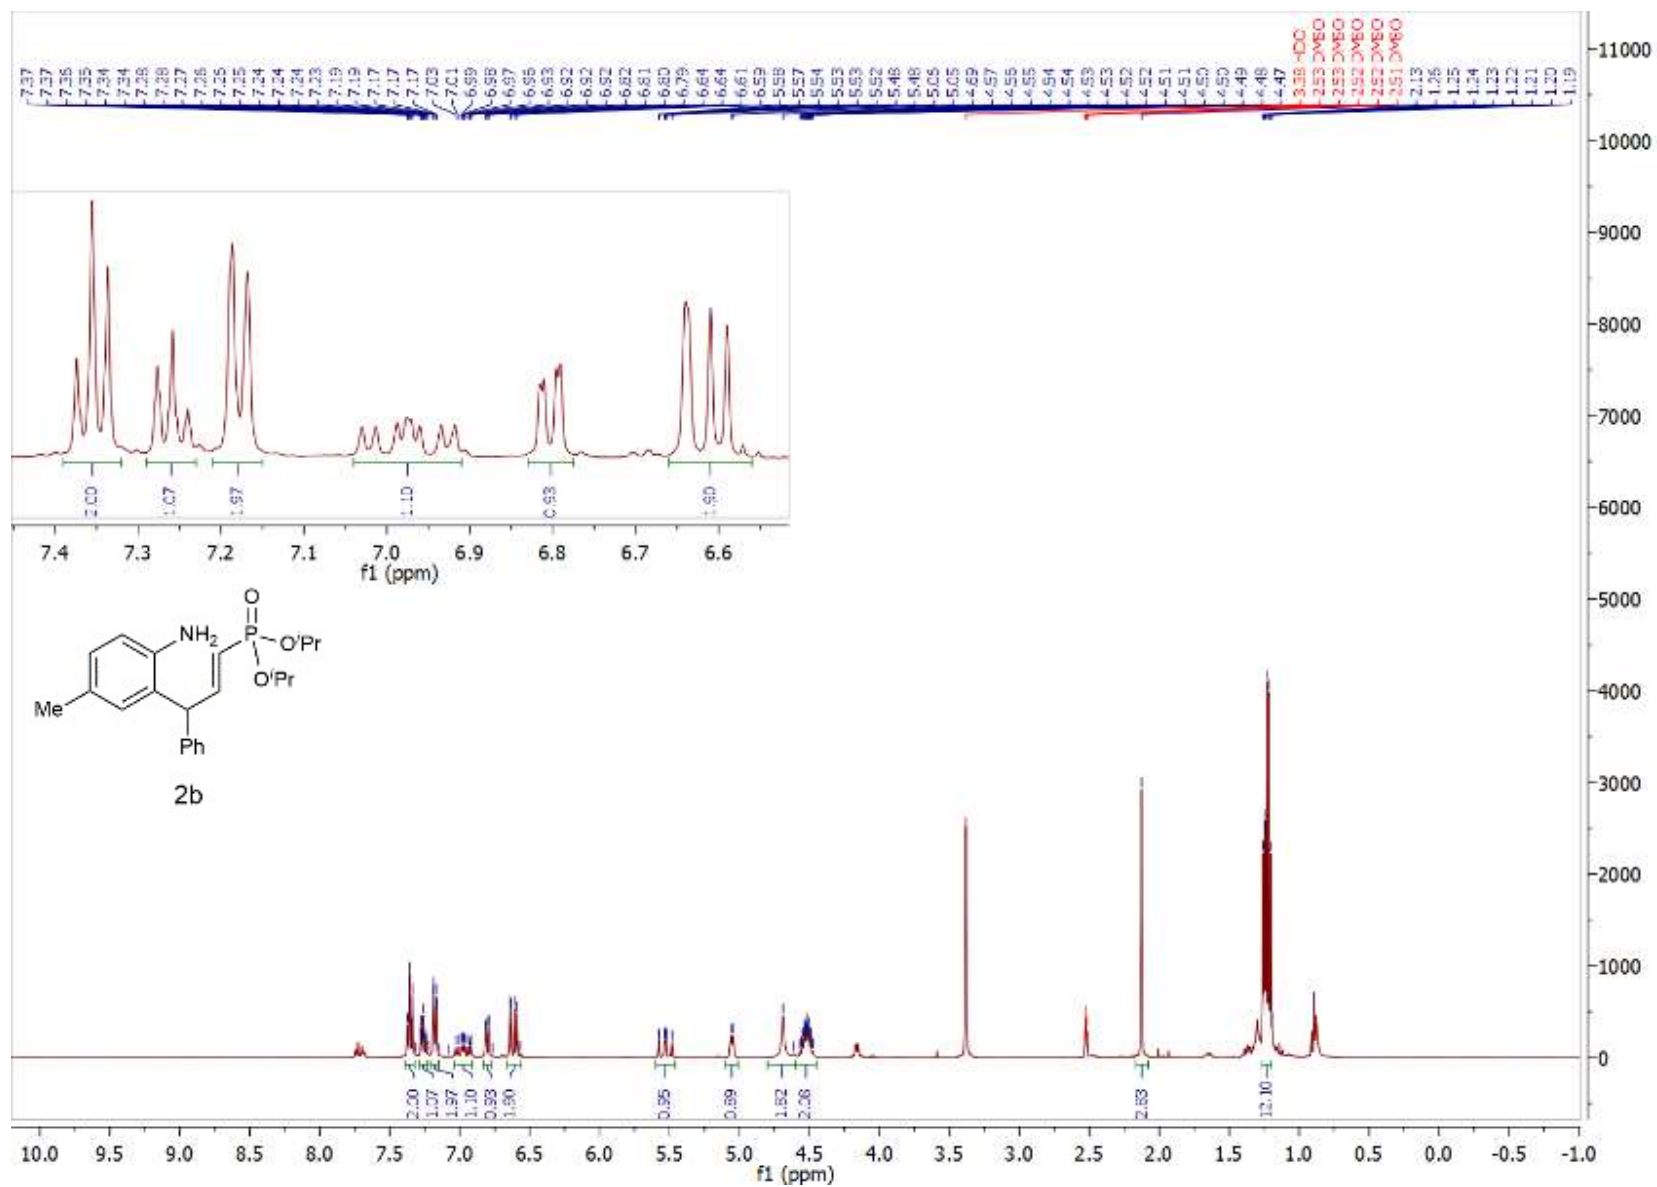

Figure S91: <sup>1</sup>H NMR Spectra of 2b

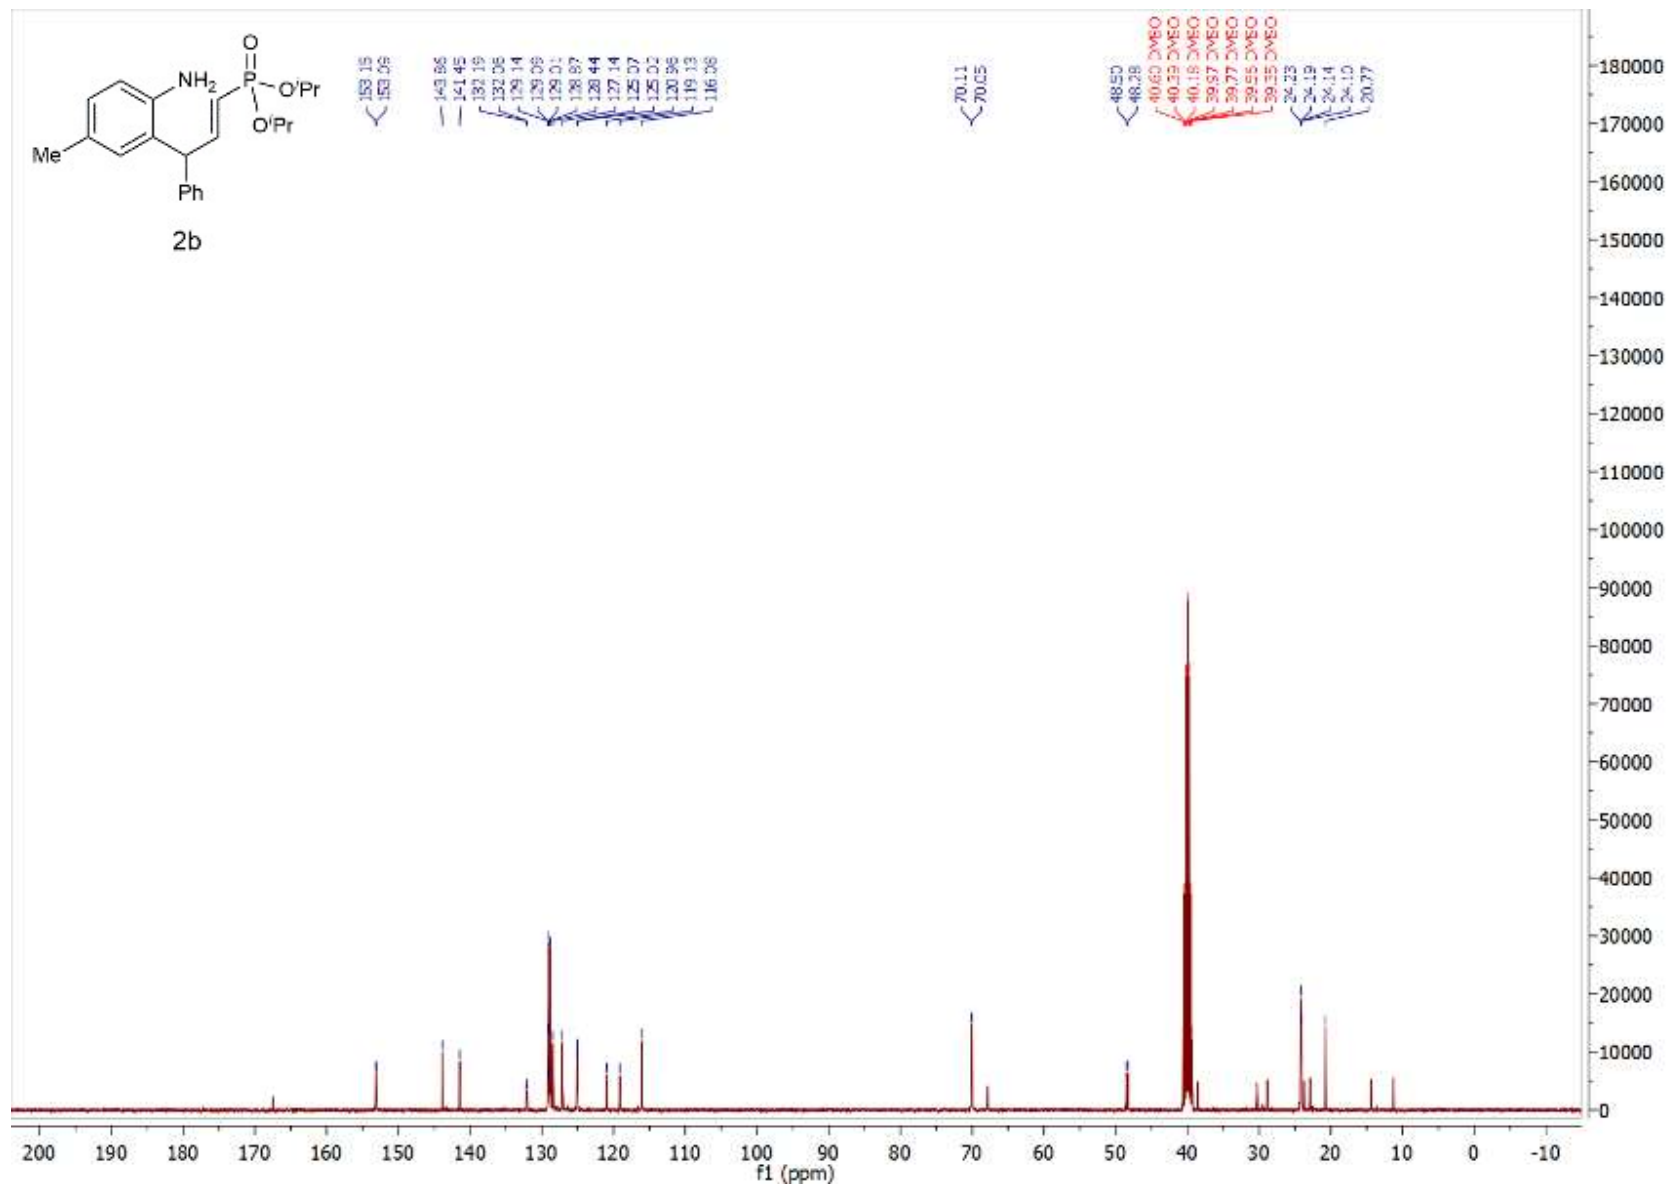

Figure S92:  $^{13}\text{C}$  NMR Spectra of 2b

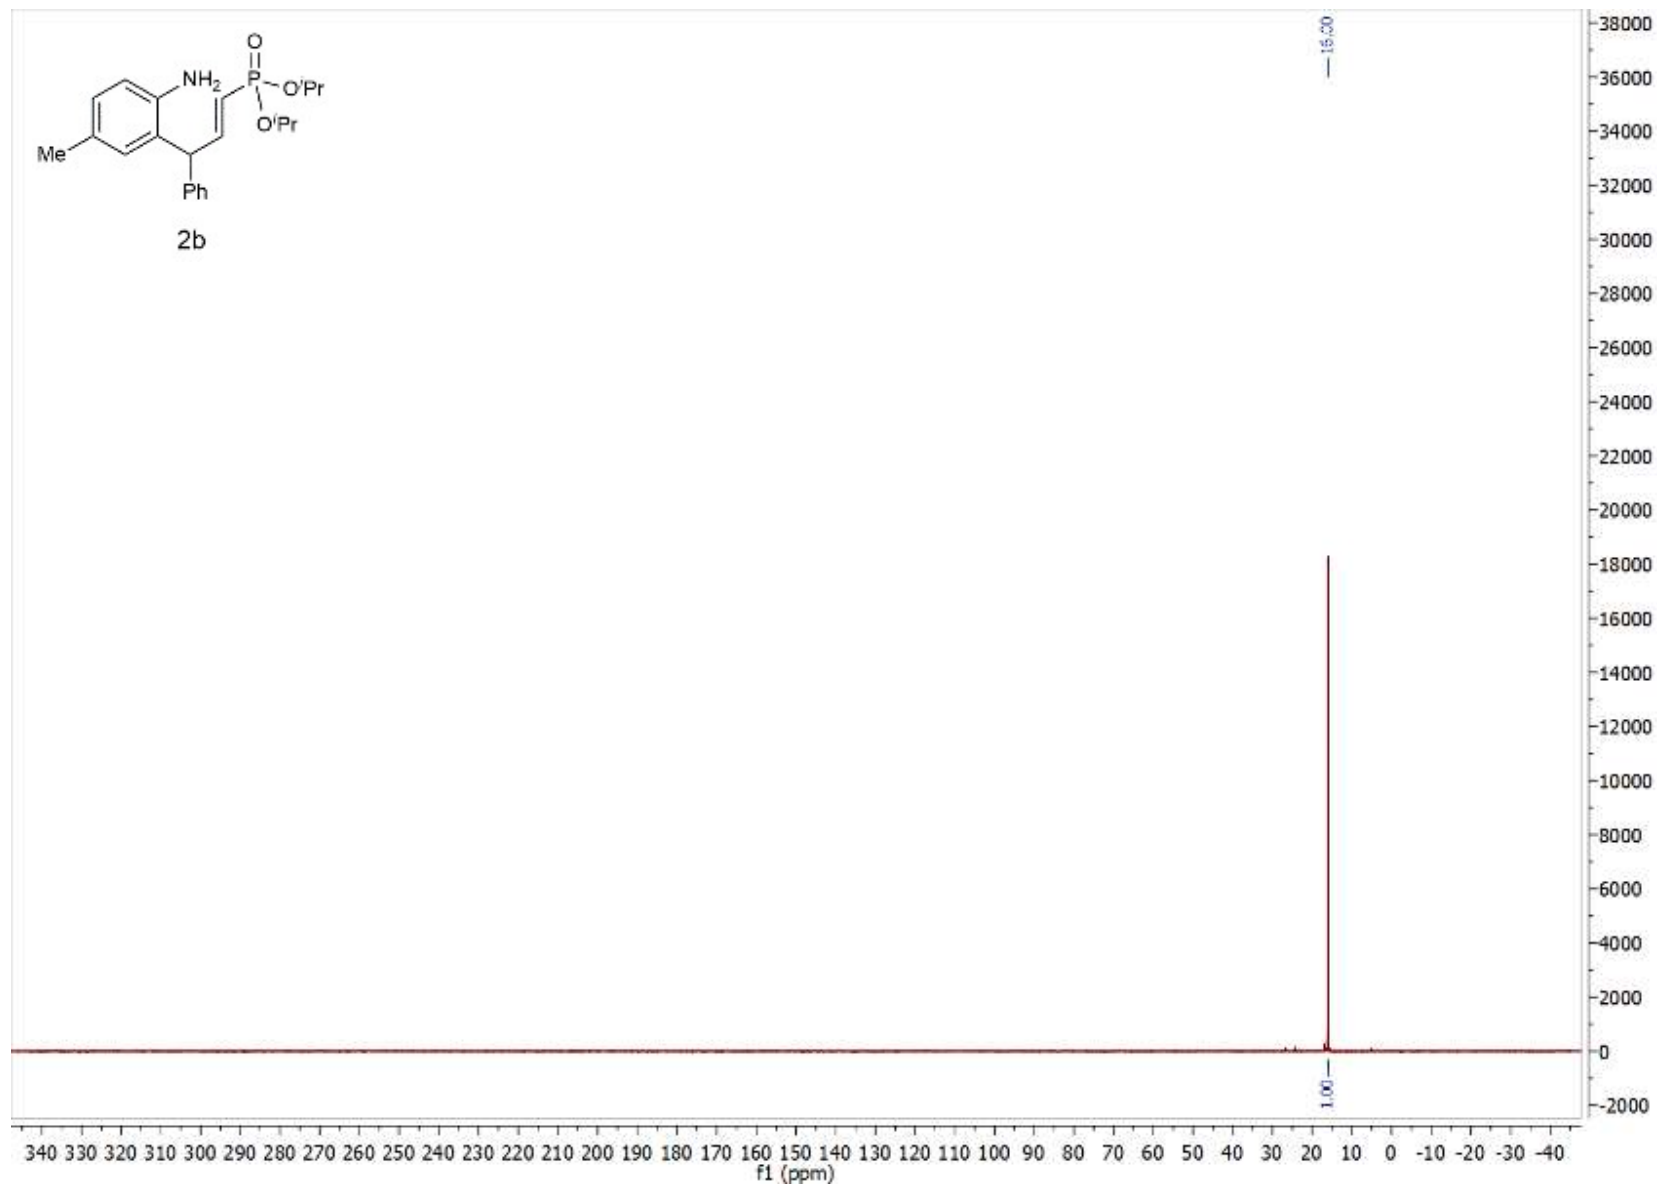

Figure S93:  $^{31}\text{P}$  NMR Spectra of 2b

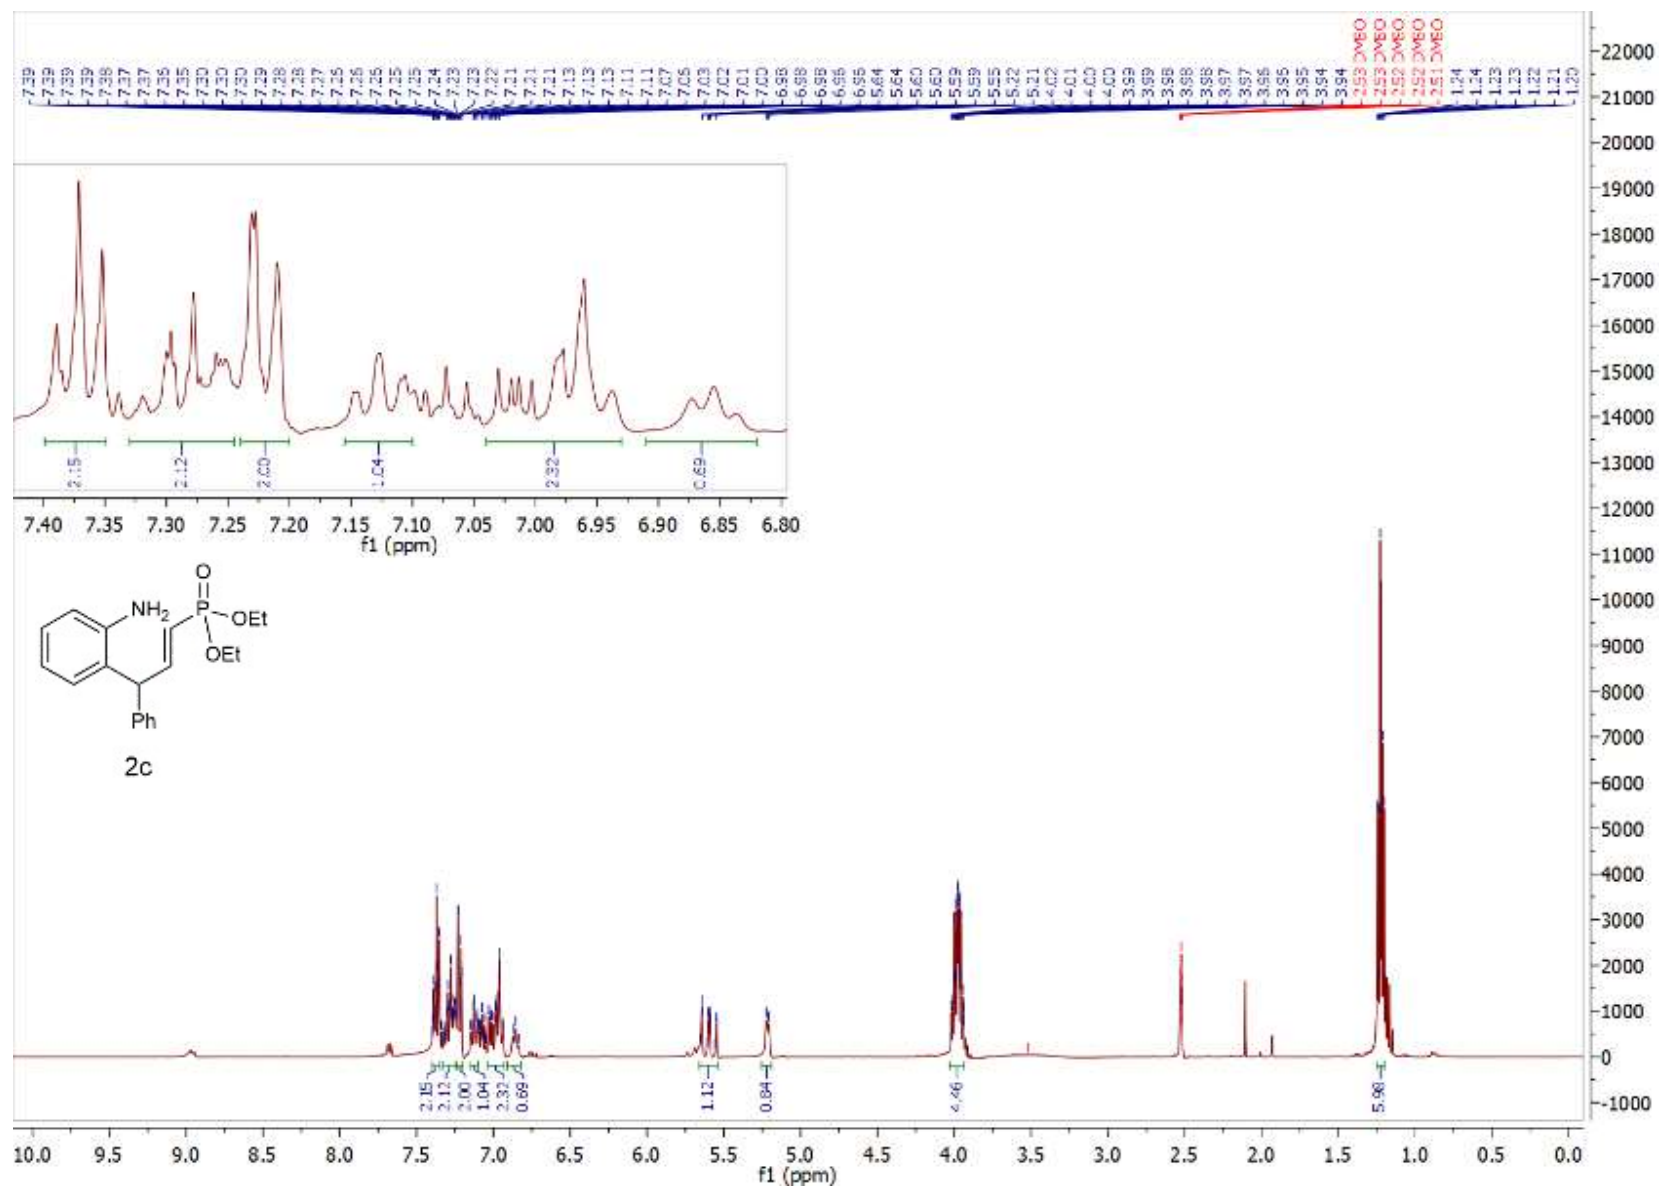

Figure S94: <sup>1</sup>H NMR Spectra of 2c

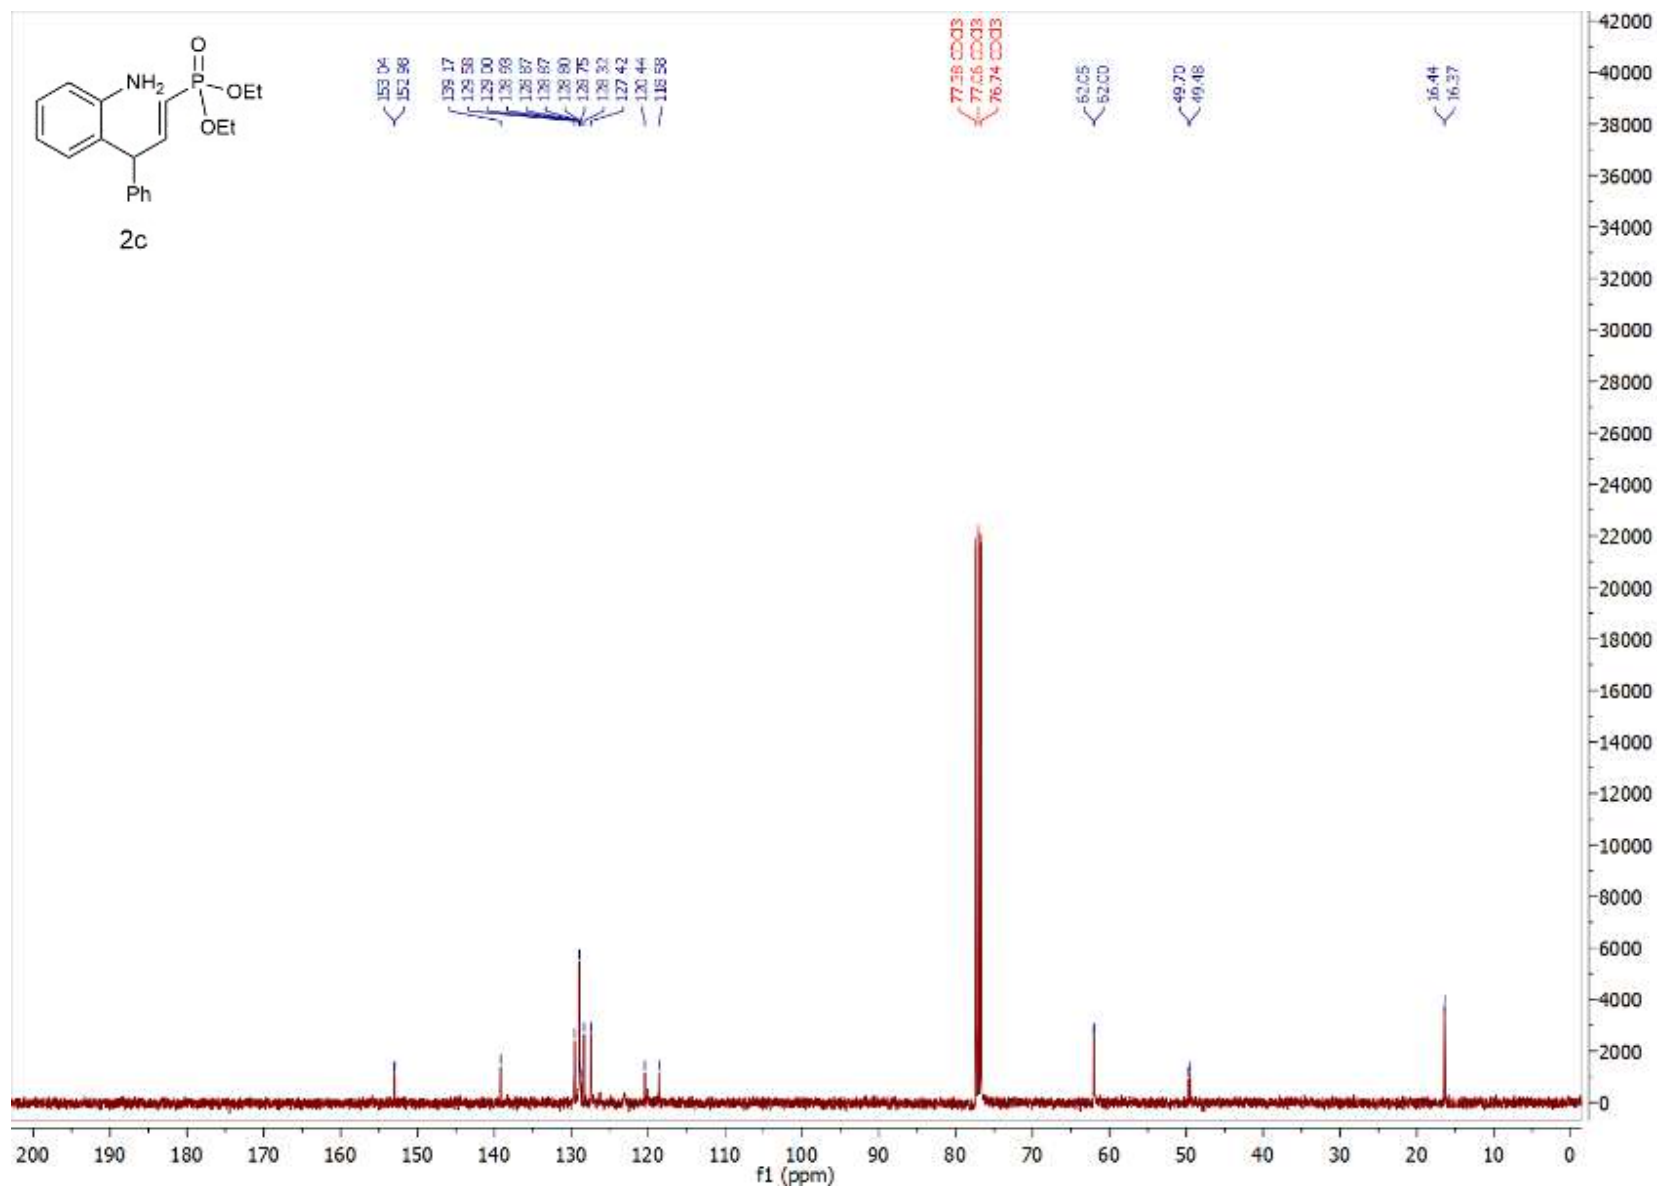

Figure S95: <sup>13</sup>C NMR Spectra of 2c



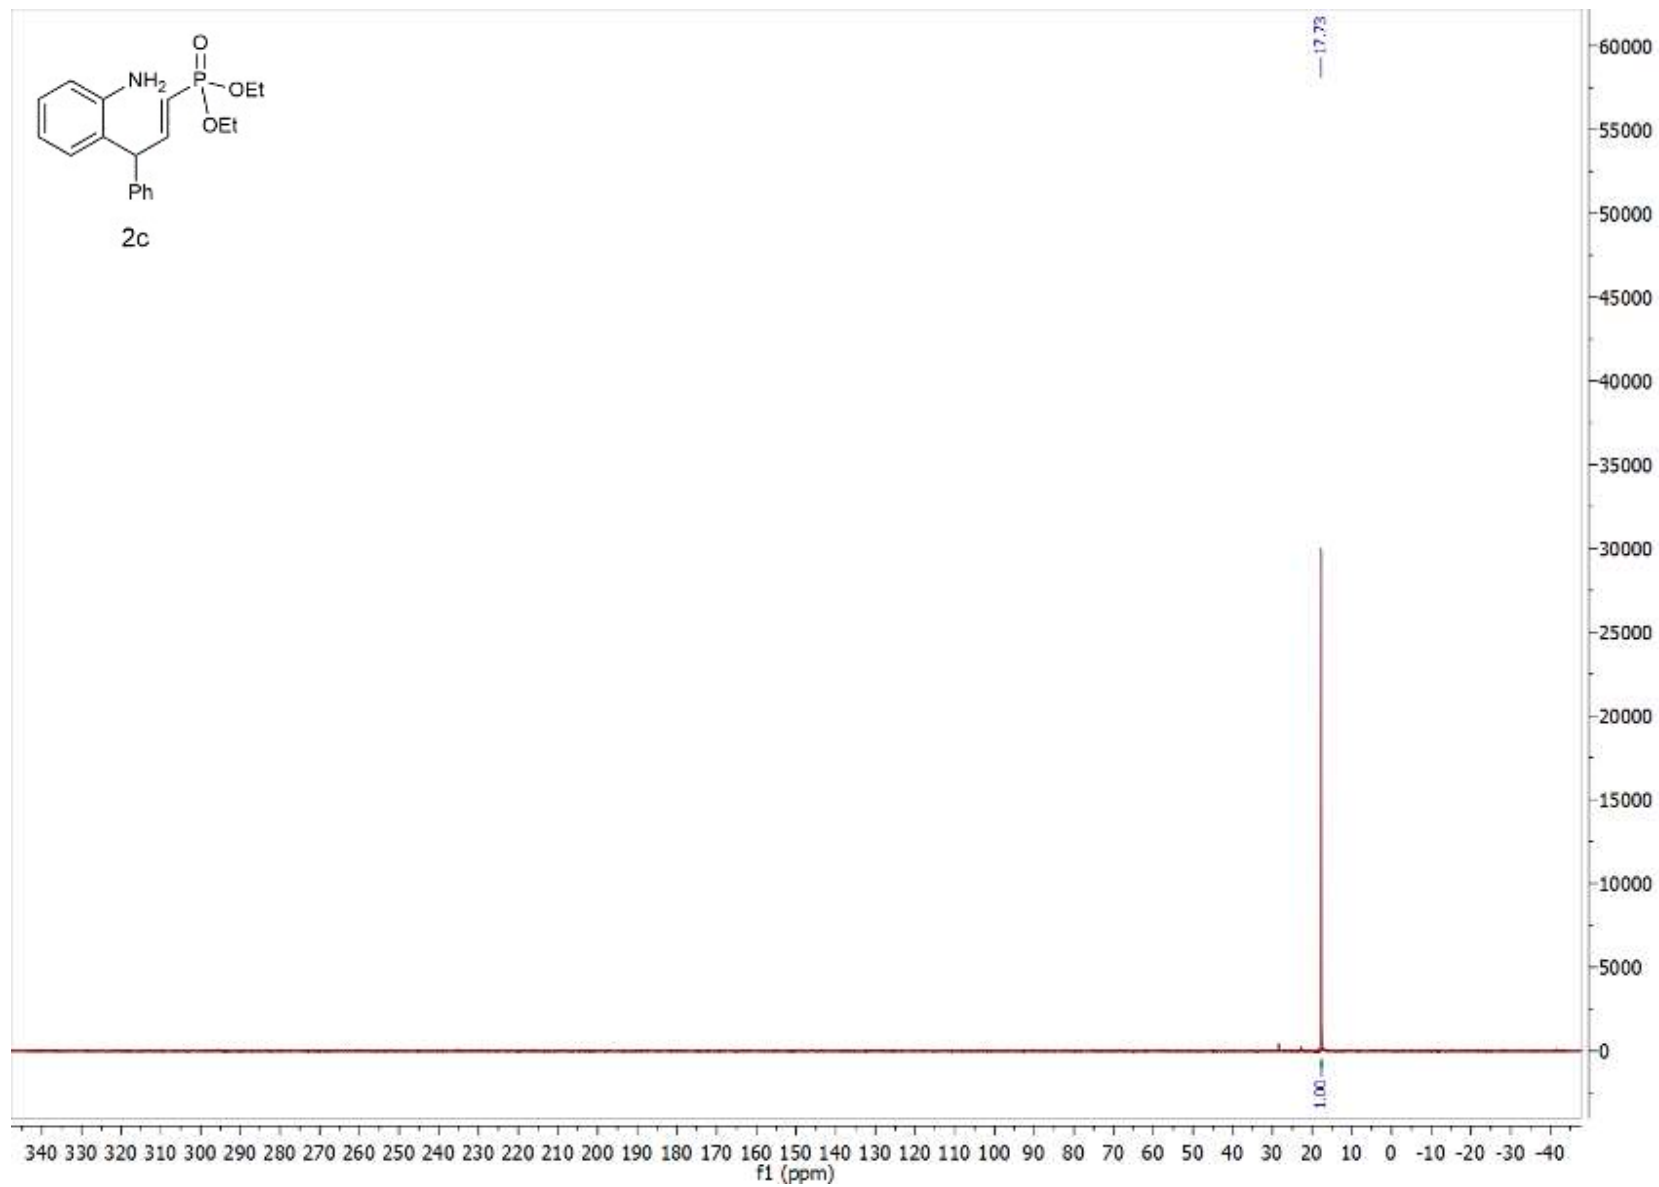

Figure S96:  $^{31}\text{P}$  NMR Spectra of 2c

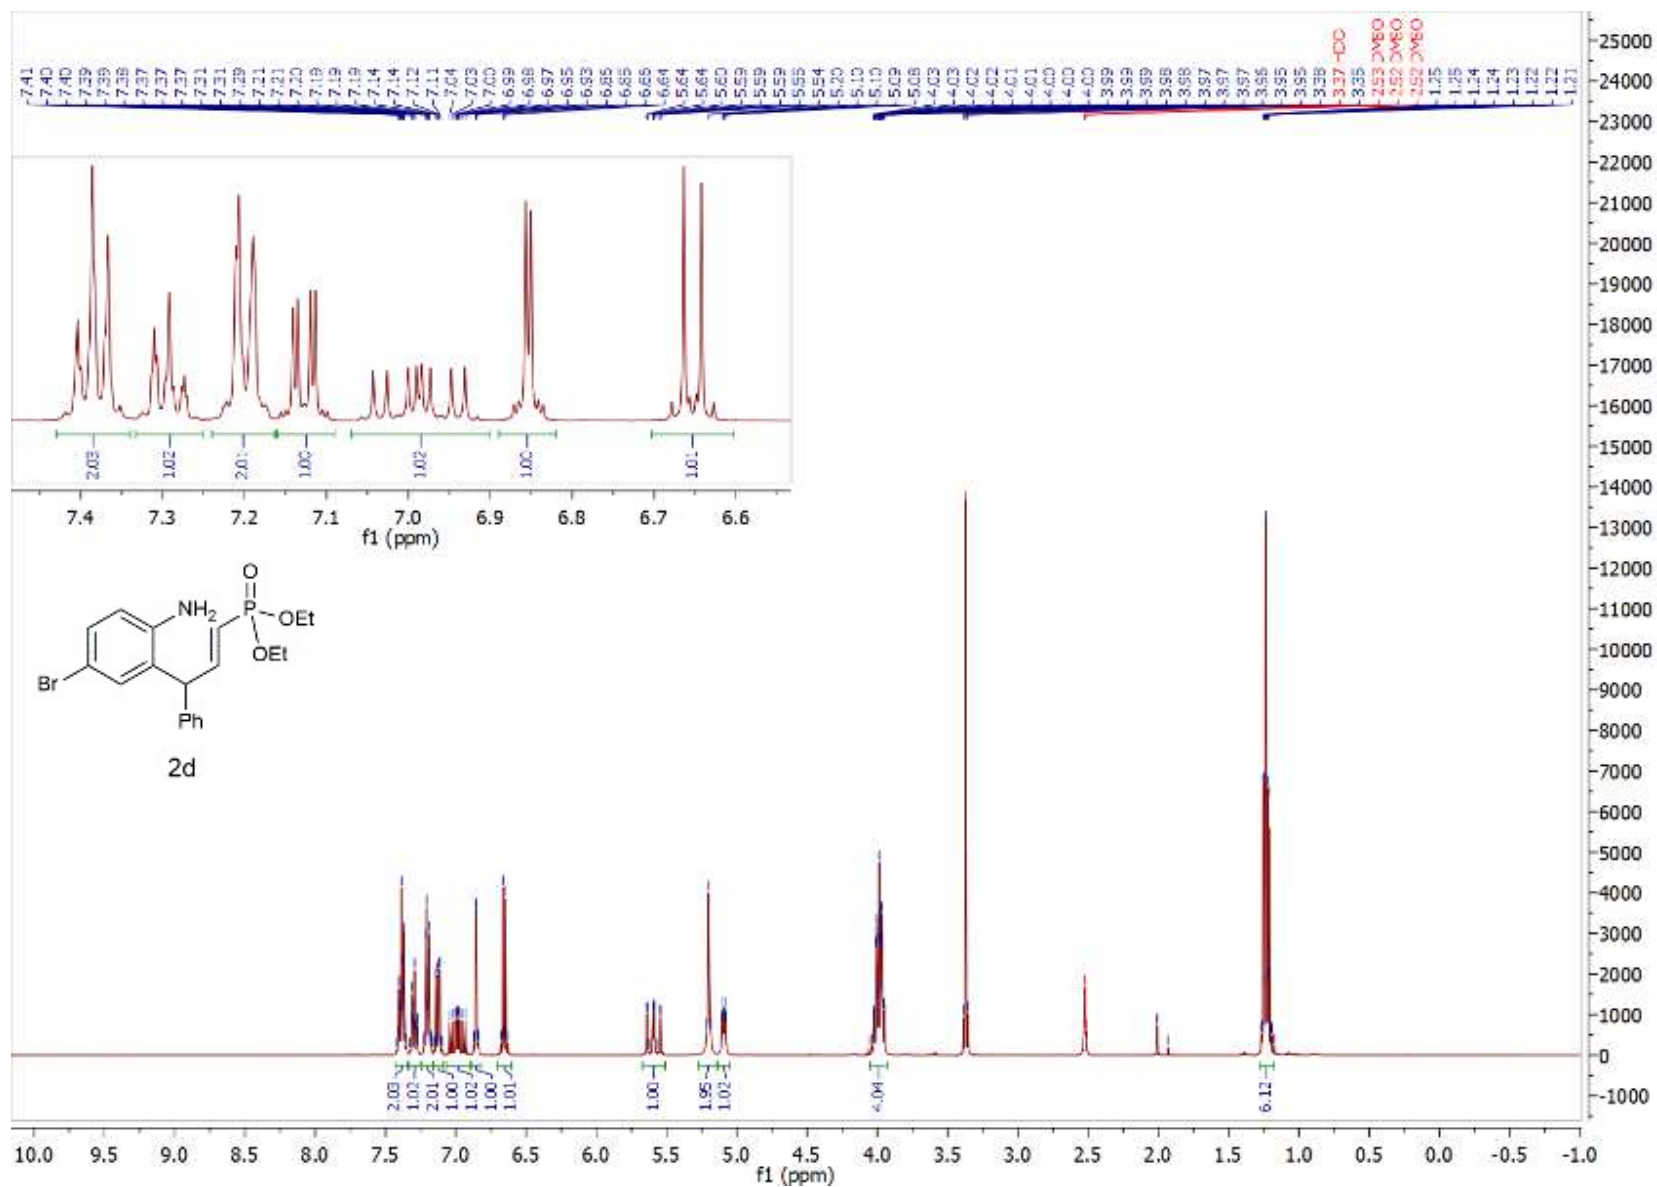

Figure S97: <sup>1</sup>H NMR Spectra of 2d

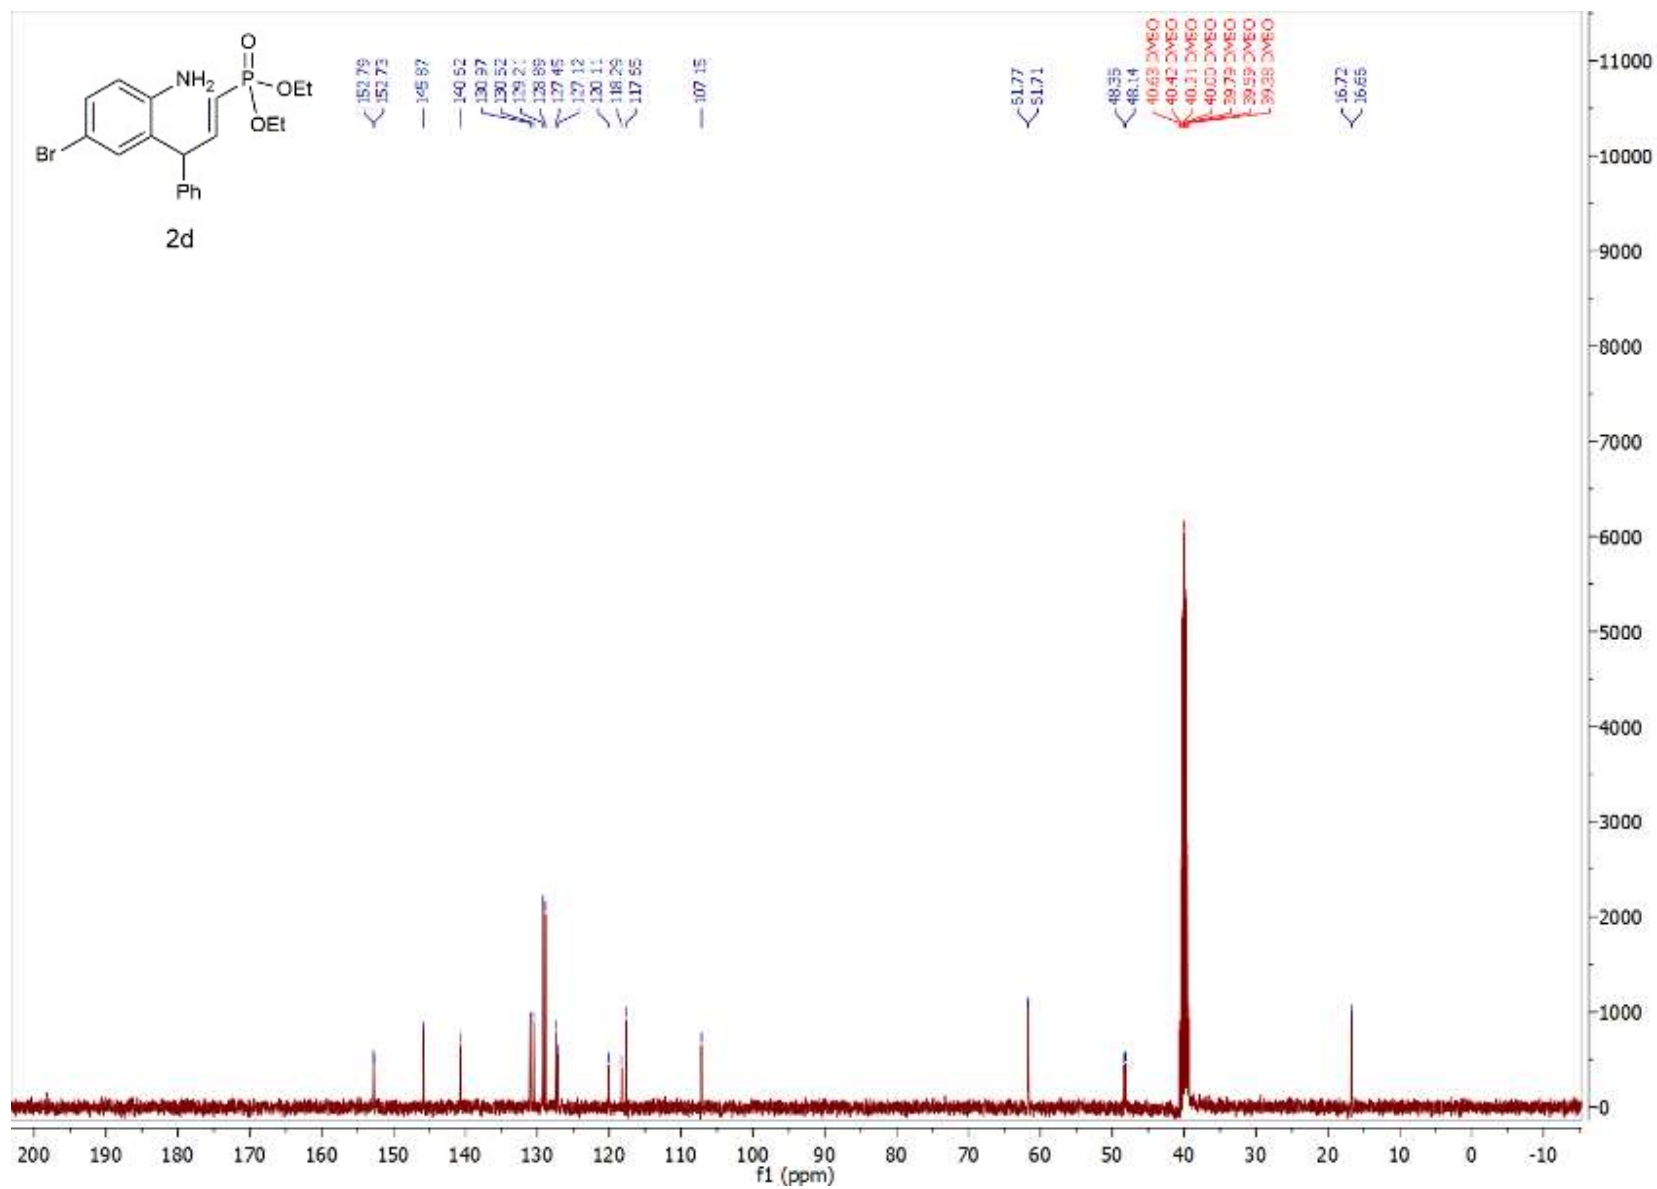

Figure S98: <sup>13</sup>C NMR Spectra of 2d

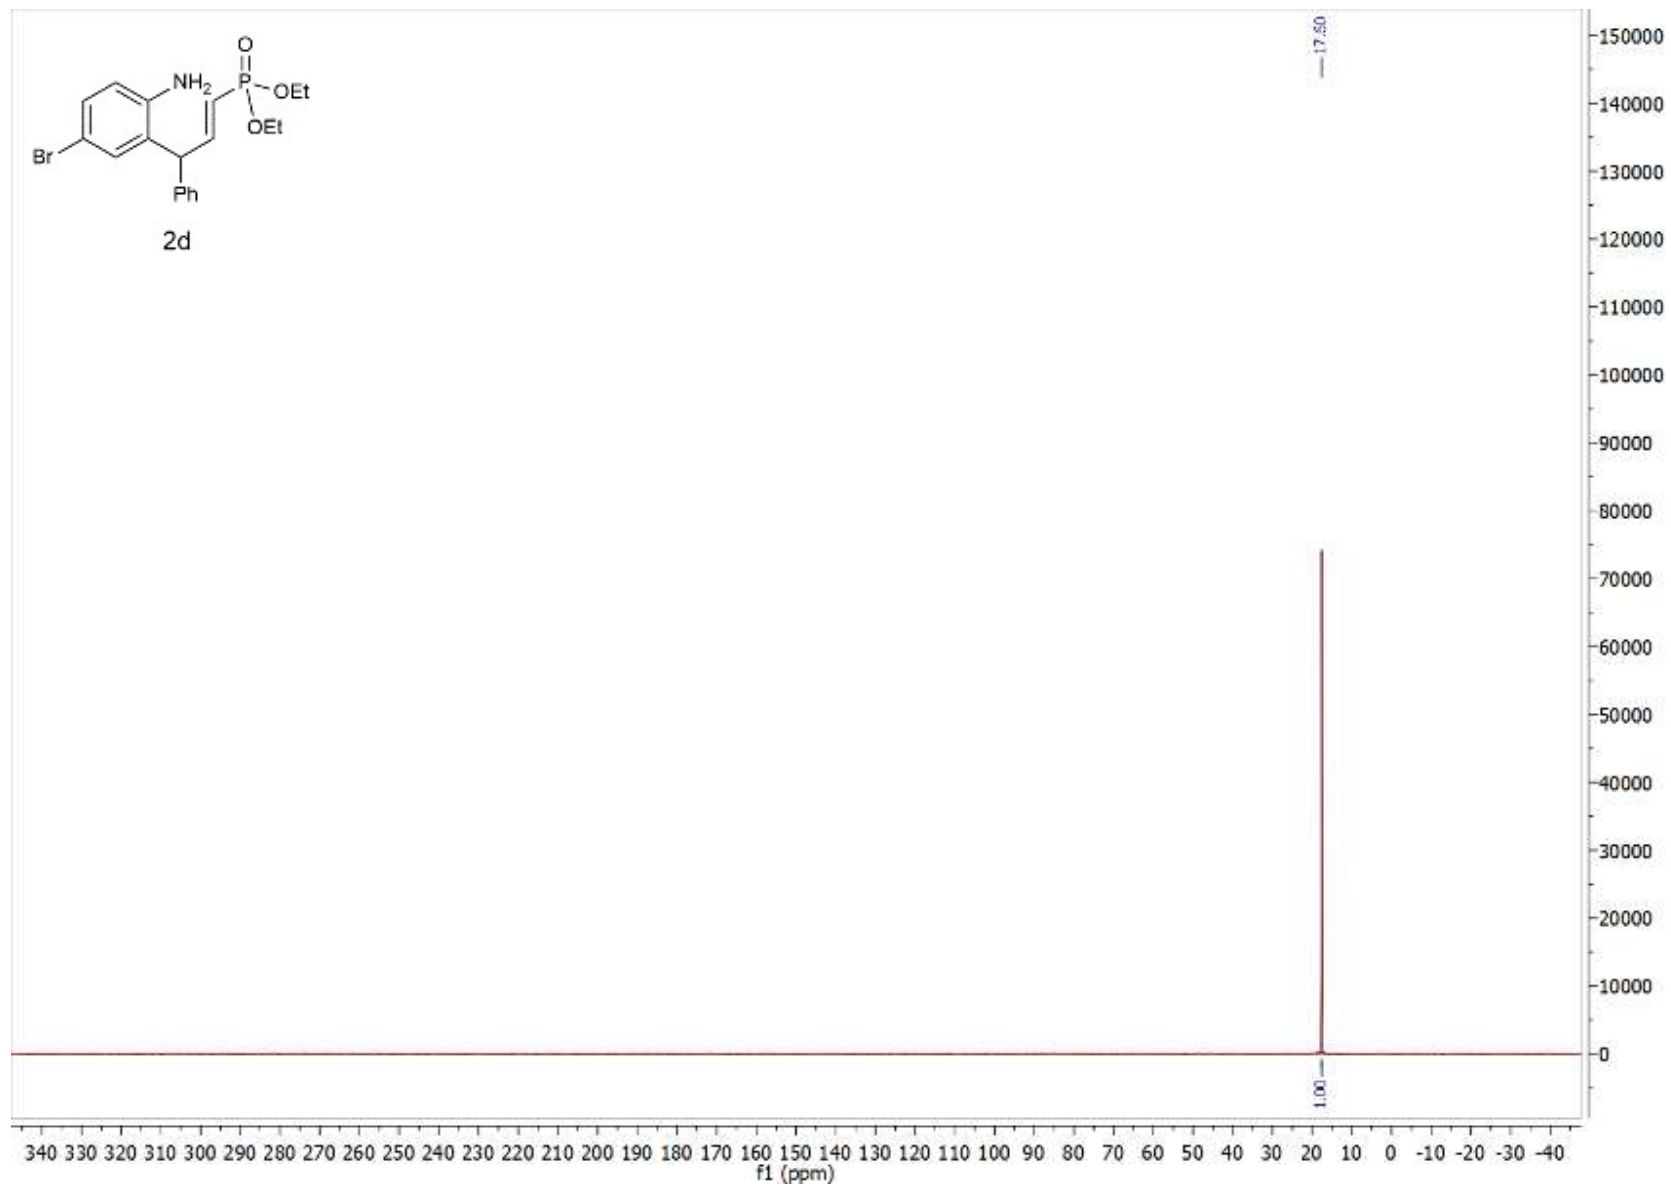

Figure S99:  $^{31}\text{P}$  NMR Spectra of 2d



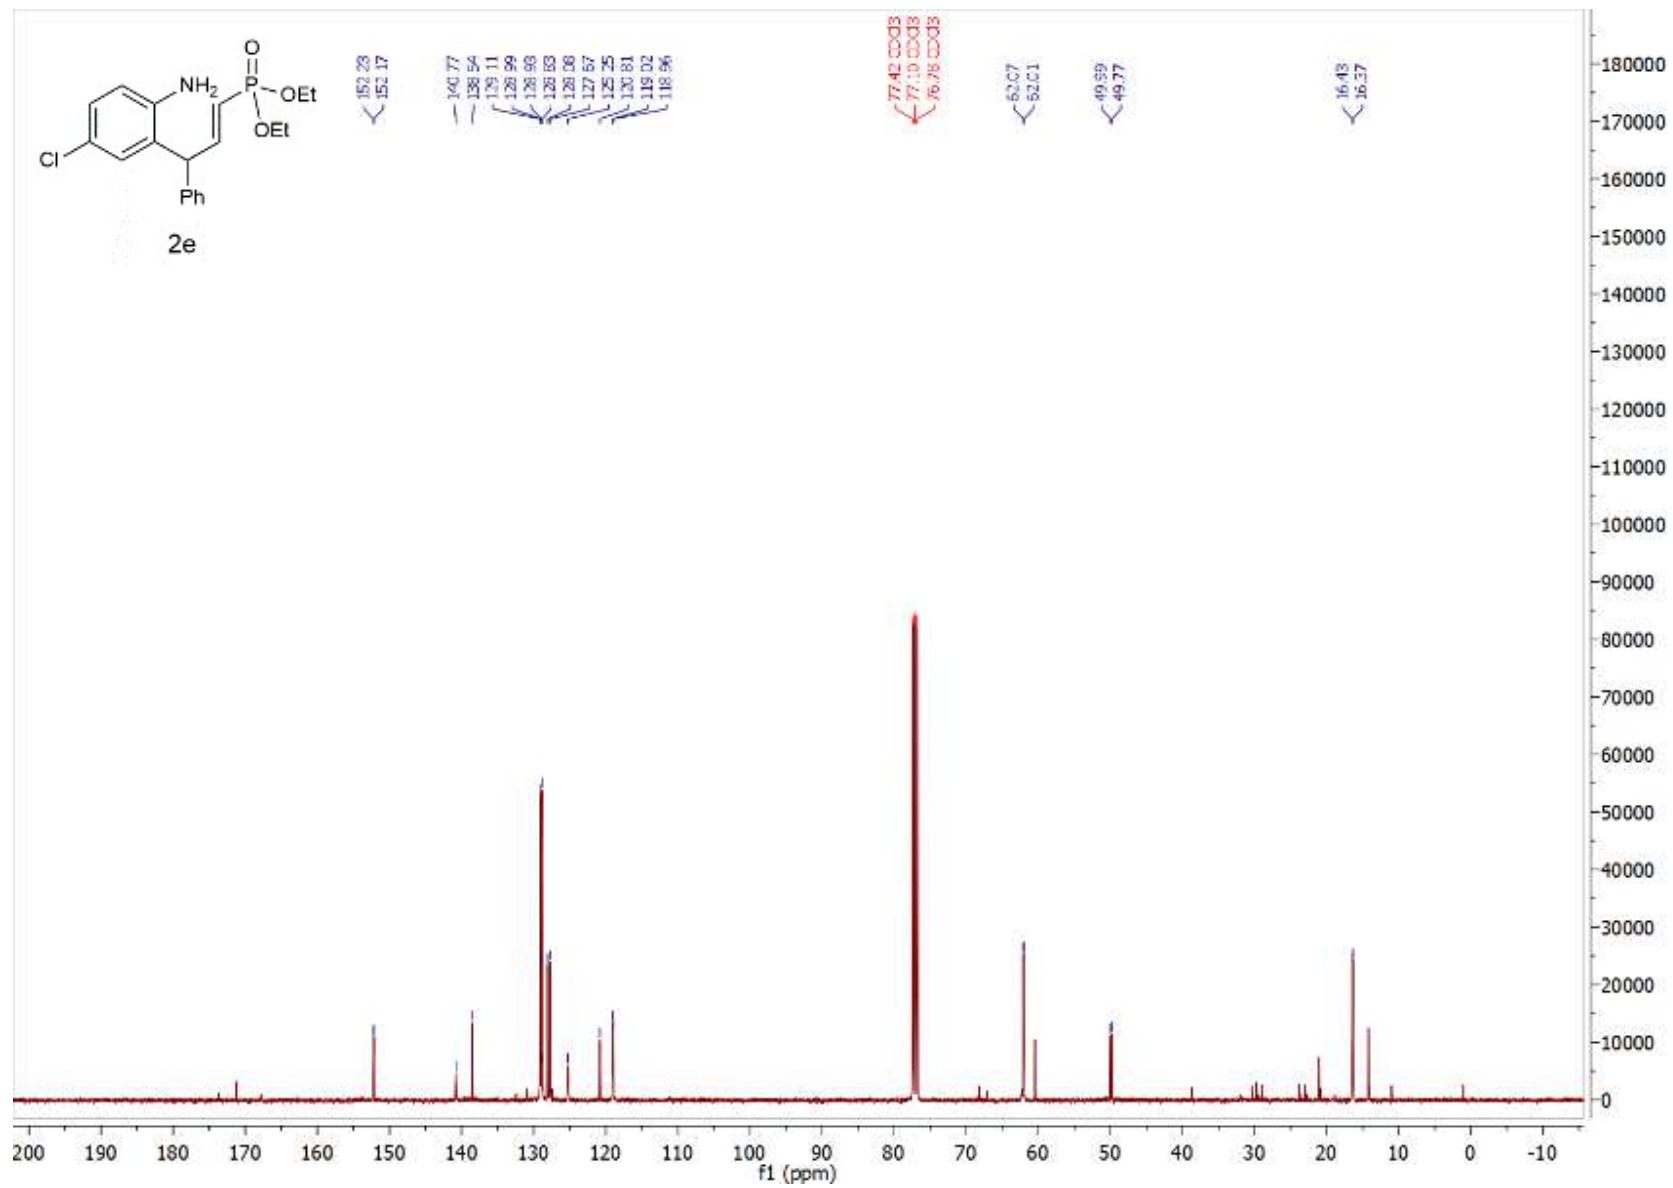

Figure S101:  $^{13}\text{C}$  NMR Spectra of 2e

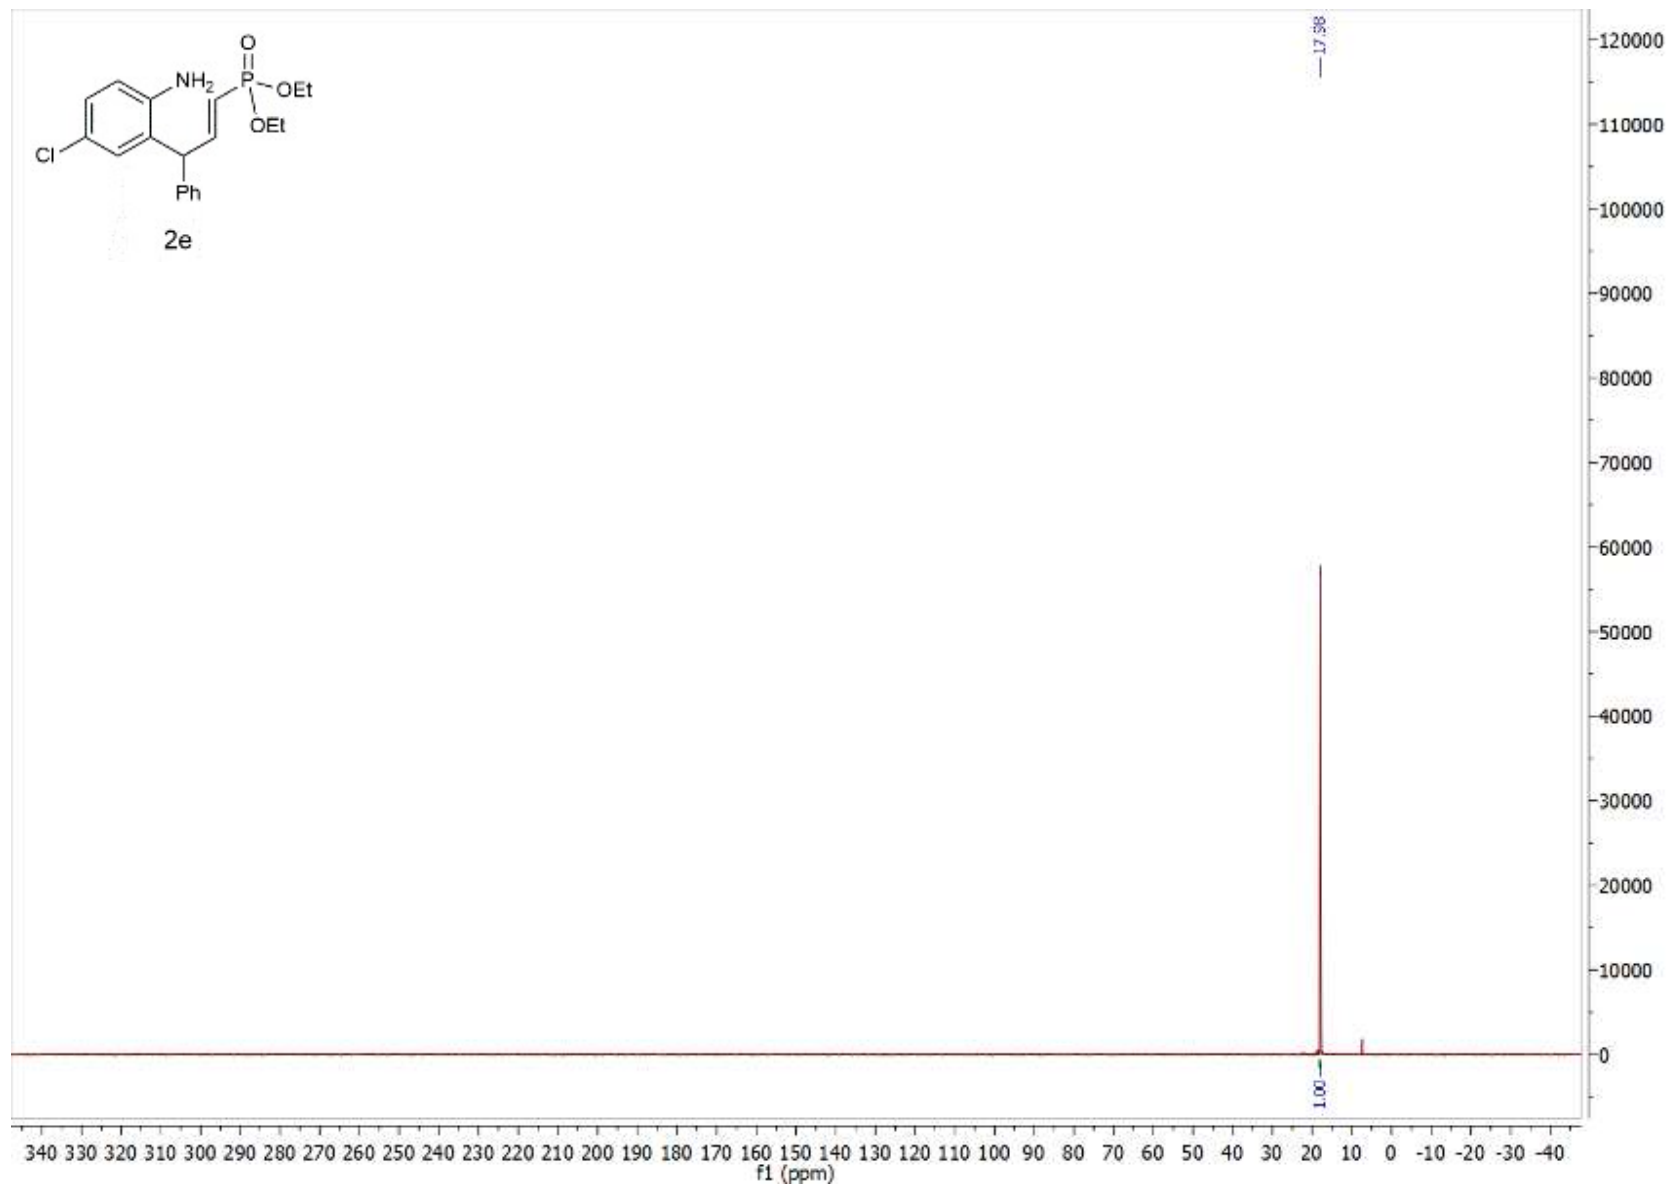

Figure S102:  $^{31}\text{P}$  NMR Spectra of 2e

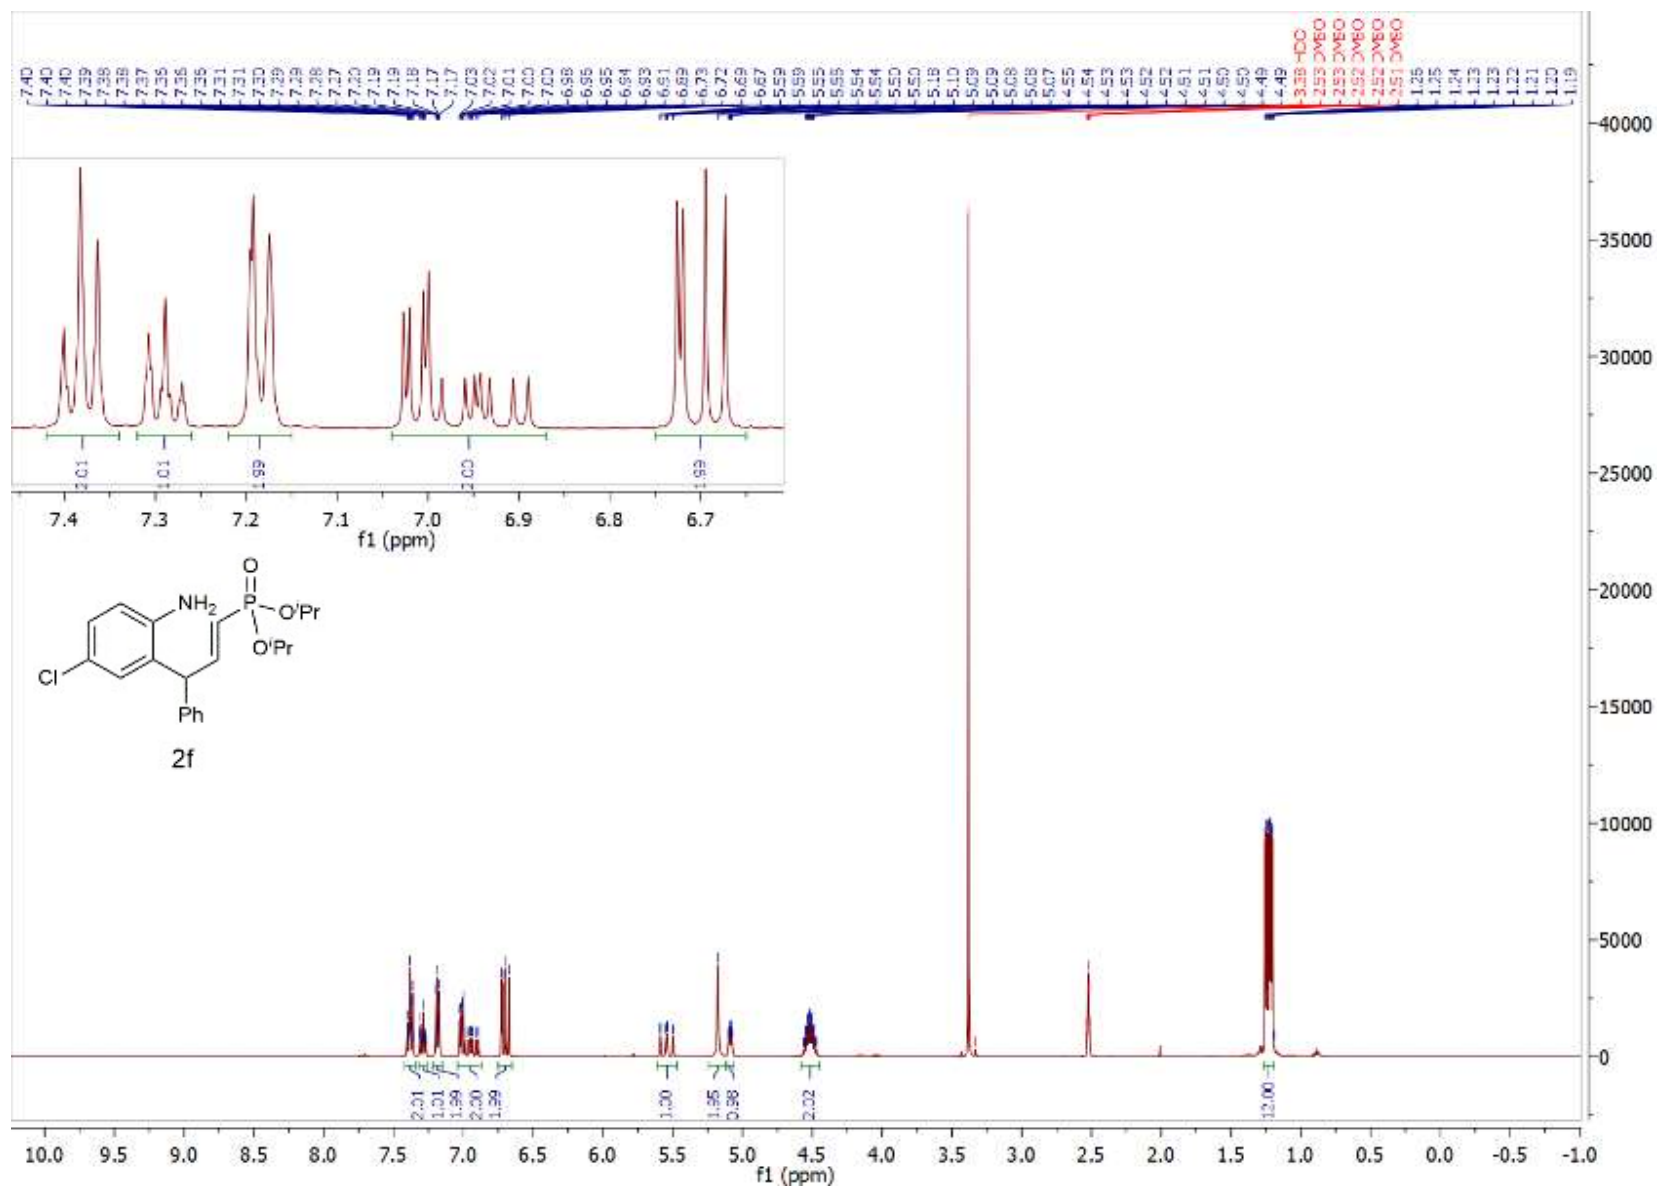

Figure S103: <sup>1</sup>H NMR Spectra of **2f**



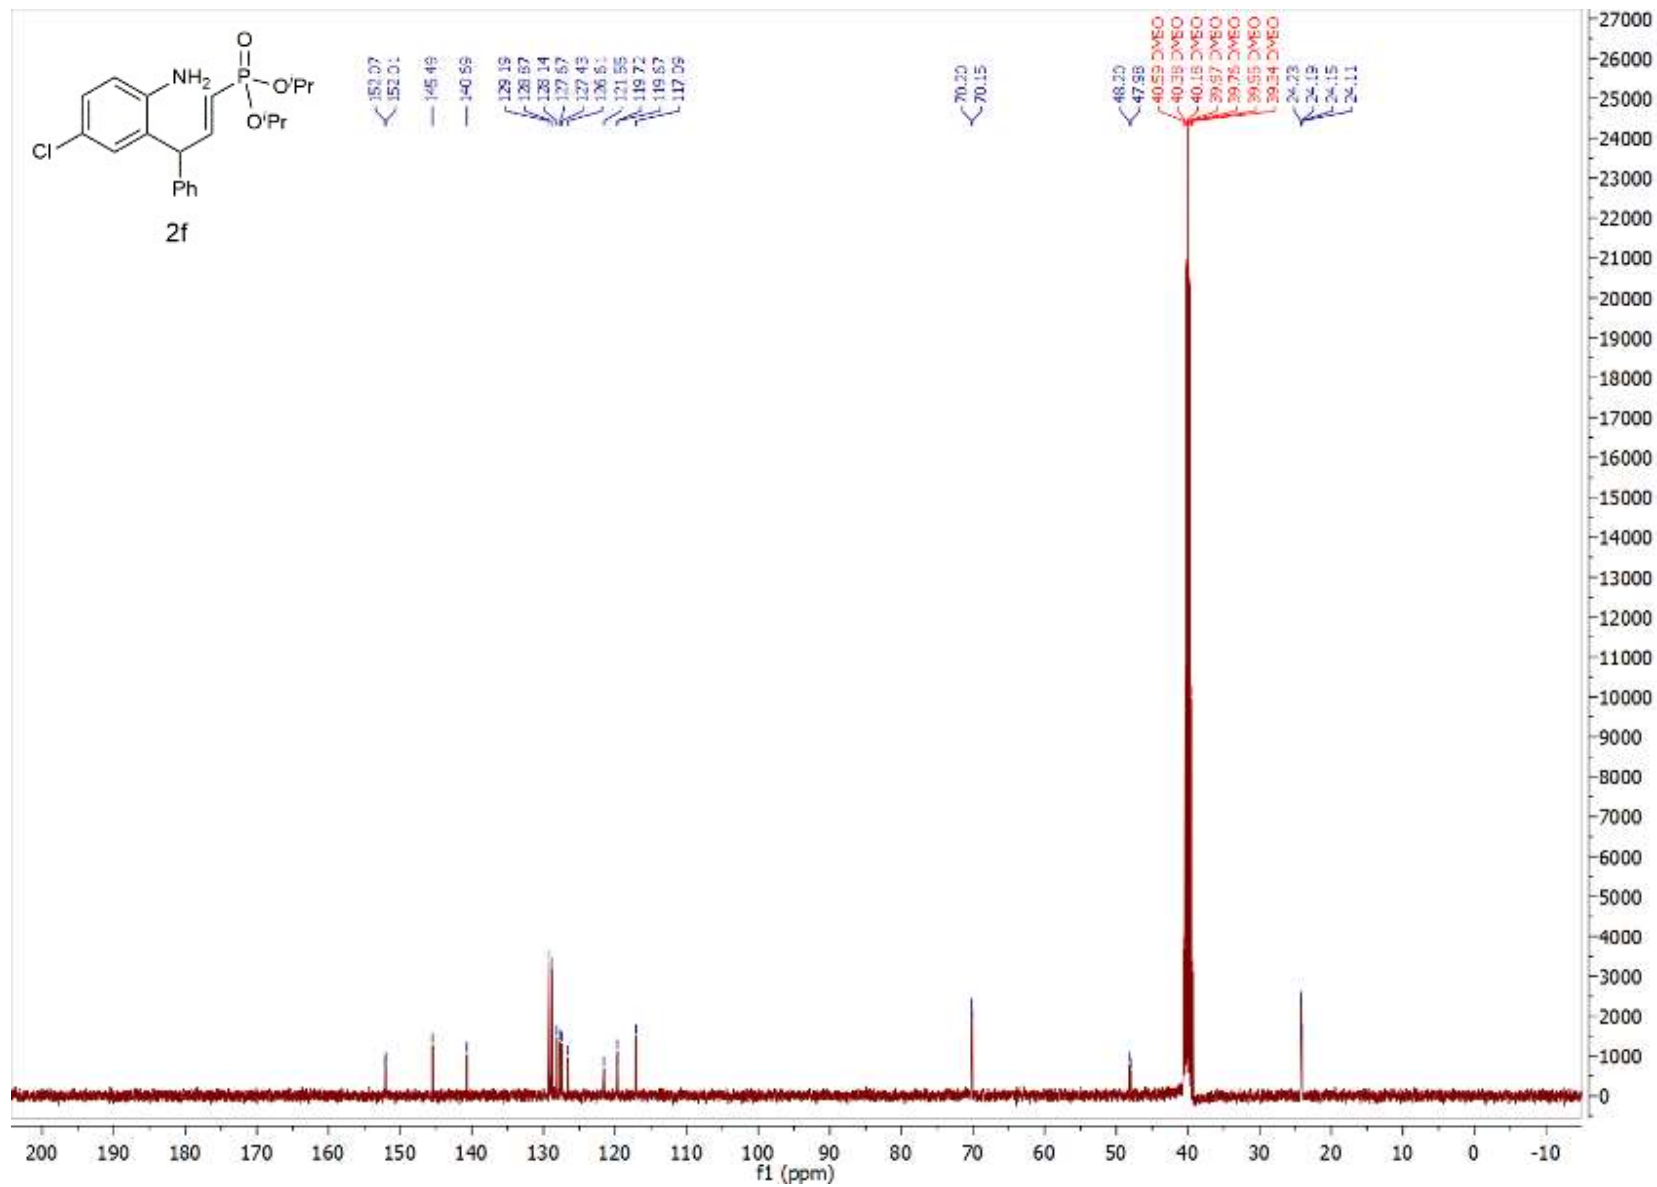

Figure S104: <sup>13</sup>C NMR Spectra of 2f

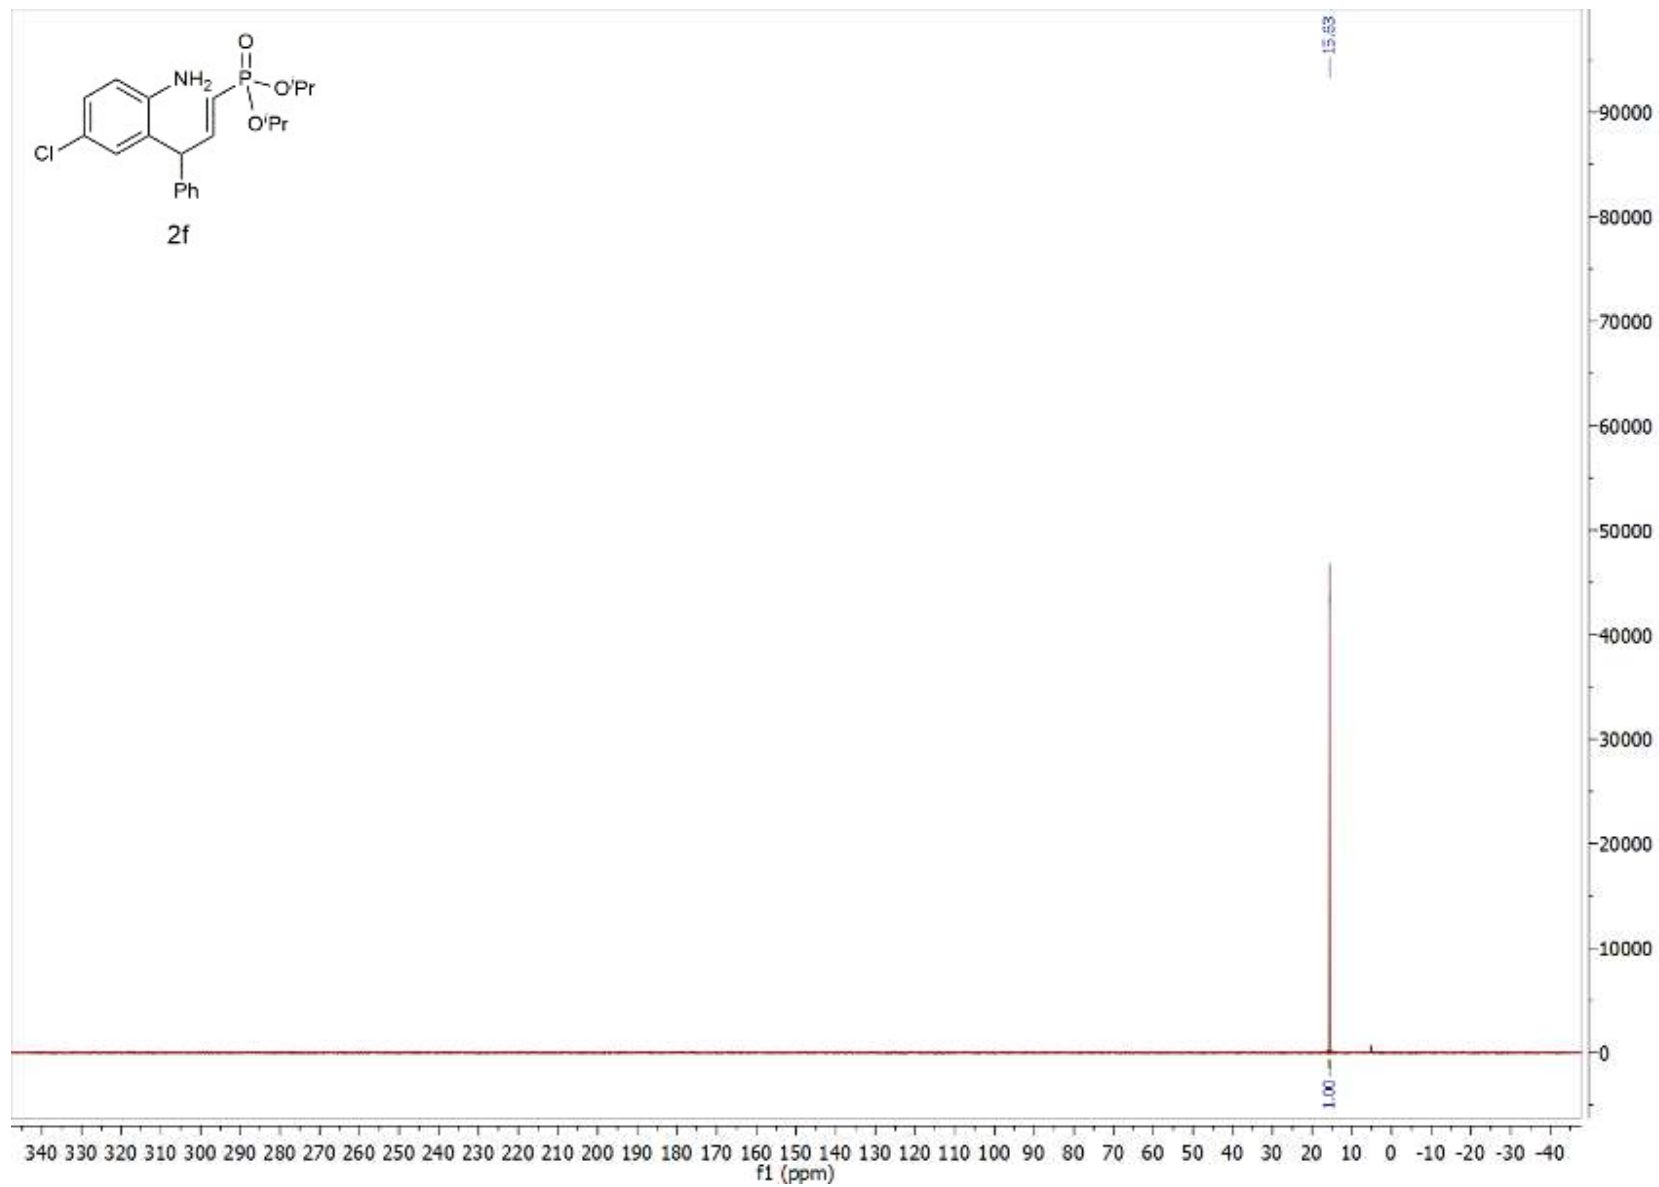

Figure S105:  $^{31}\text{P}$  NMR Spectra of **2f**

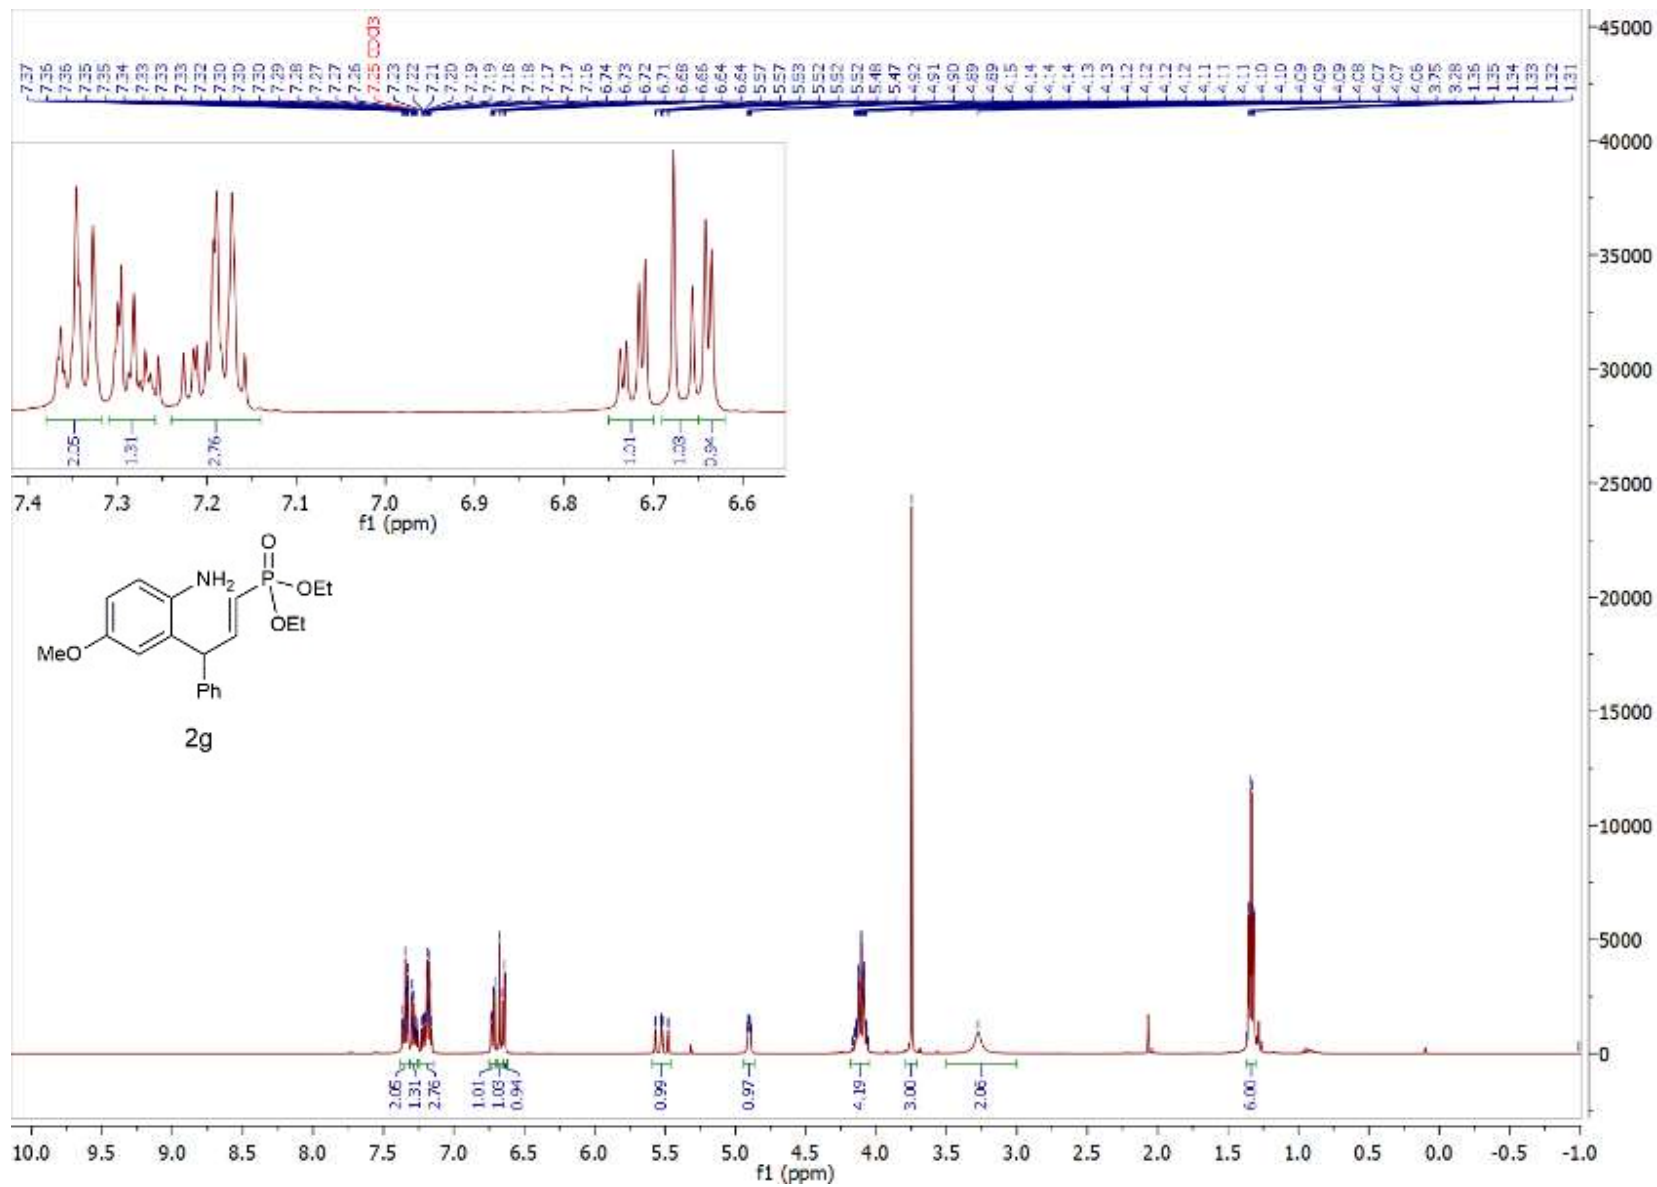

Figure S106: <sup>1</sup>H NMR Spectra of **2g**

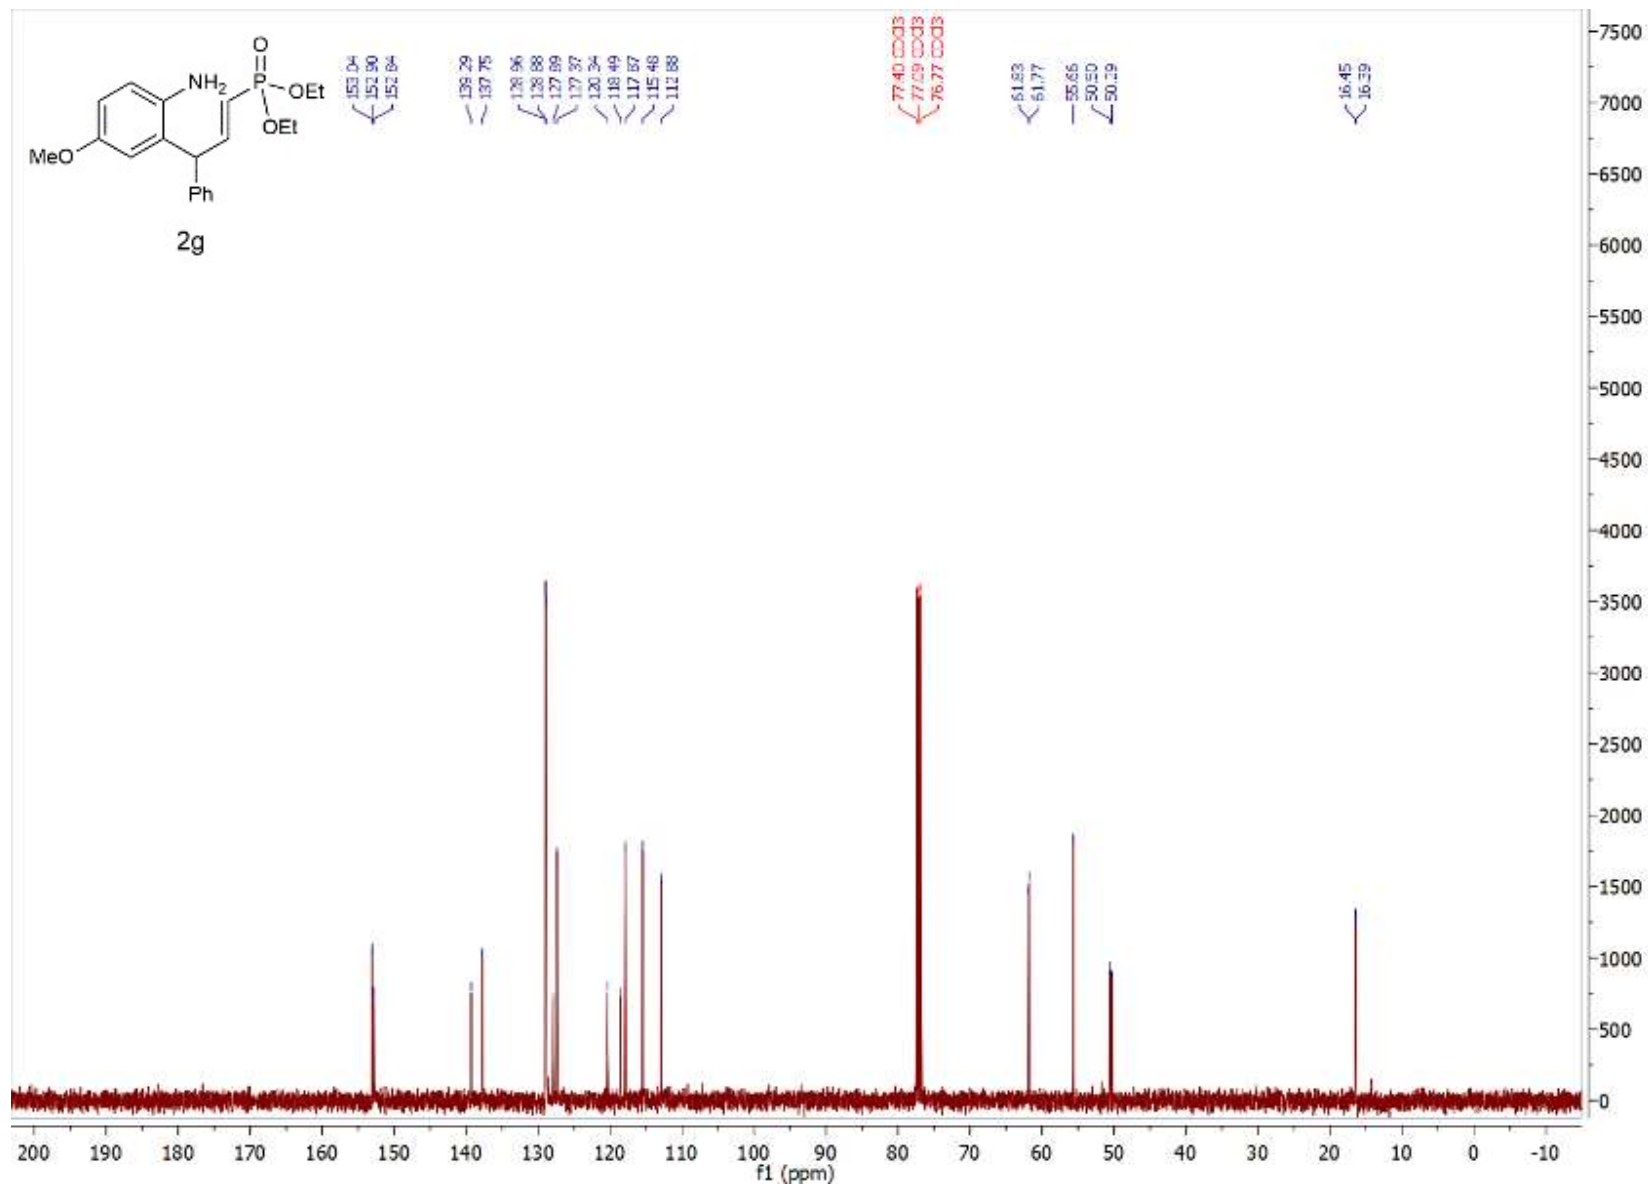

Figure S107: <sup>13</sup>C NMR Spectra of 2g

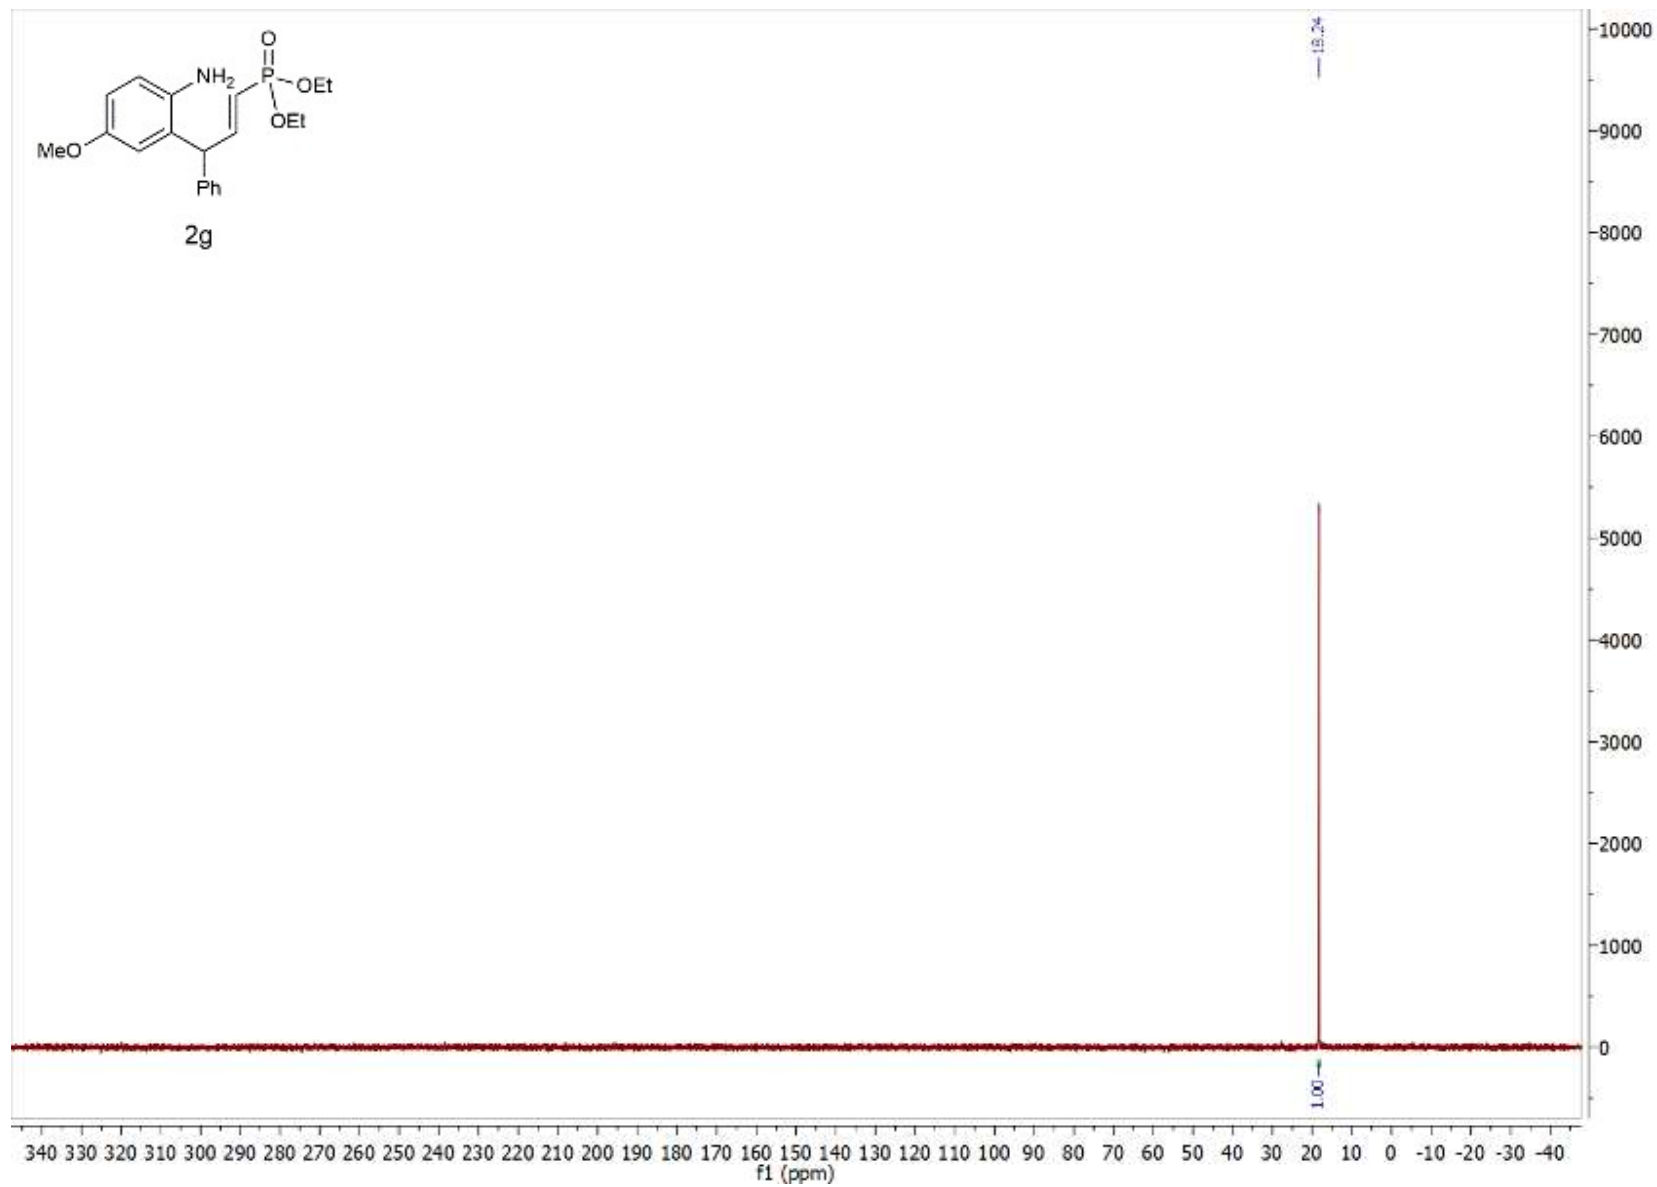

Figure S108: <sup>31</sup>P NMR Spectra of 2g



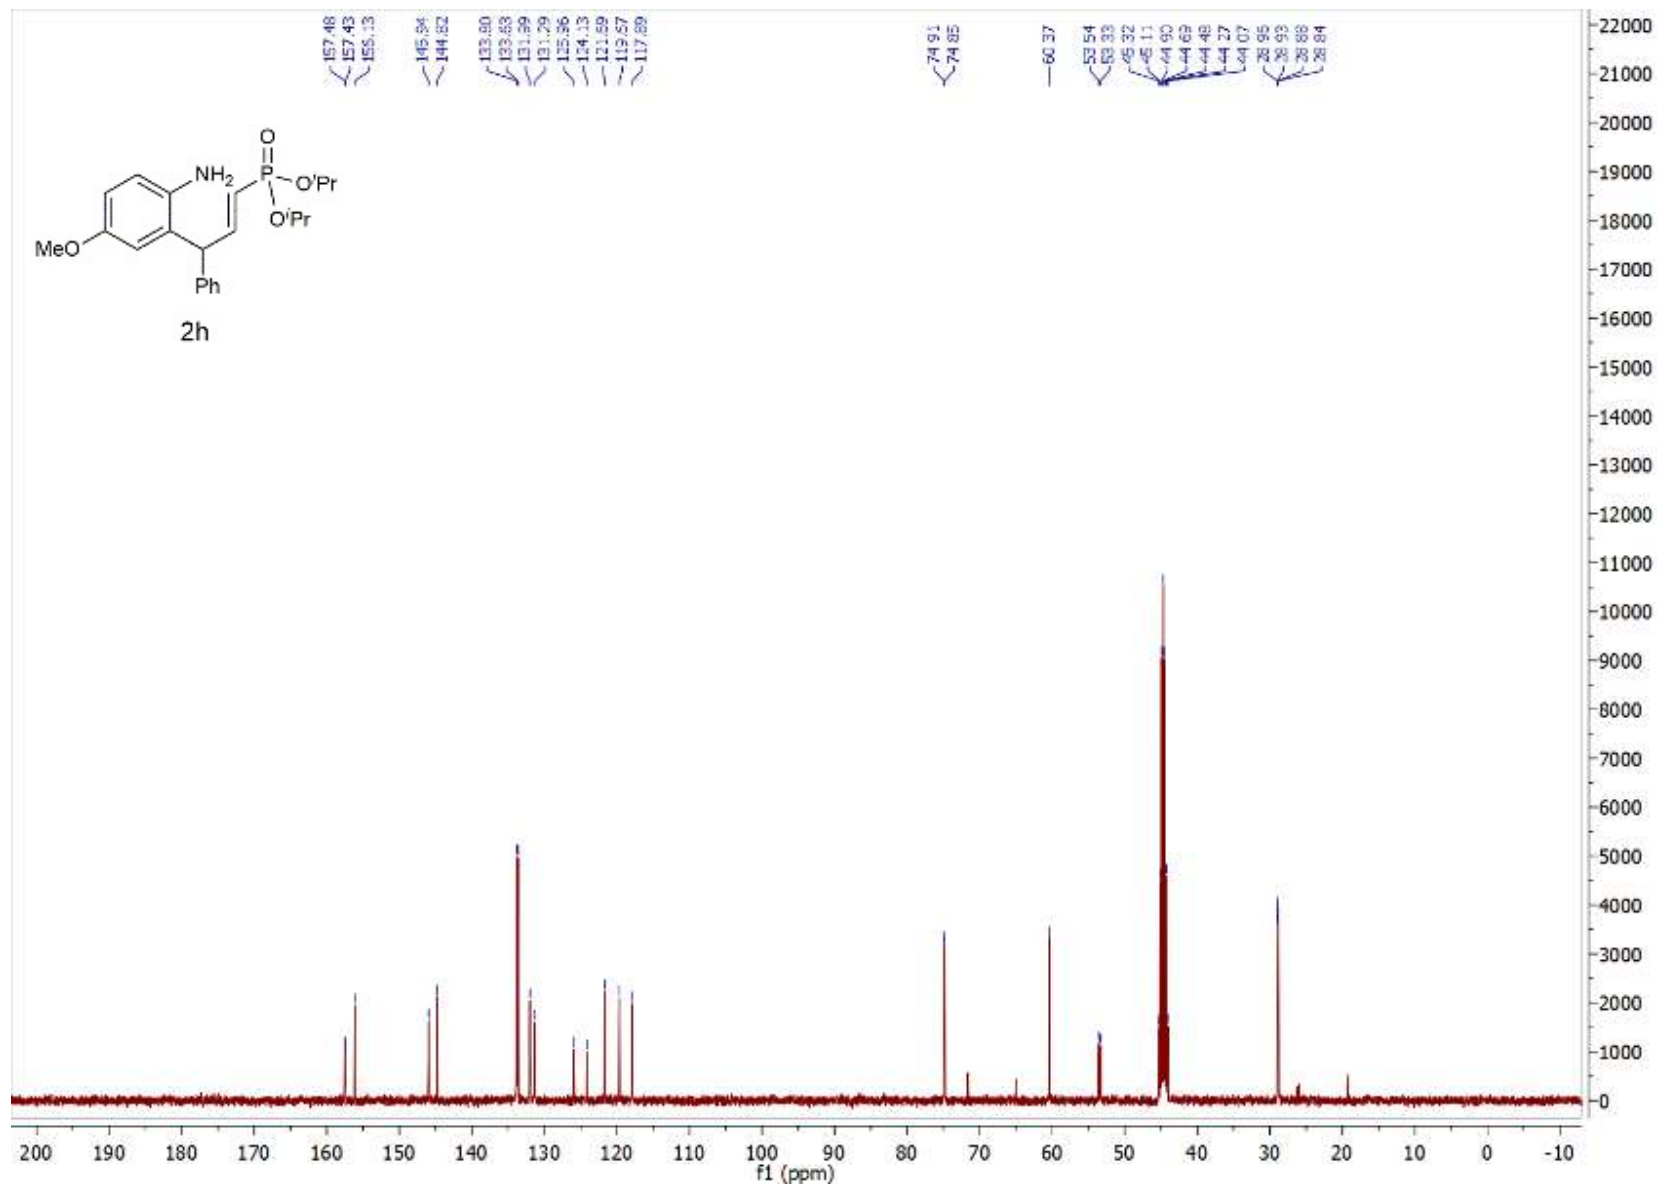

Figure S110: <sup>13</sup>C NMR Spectra of 2h

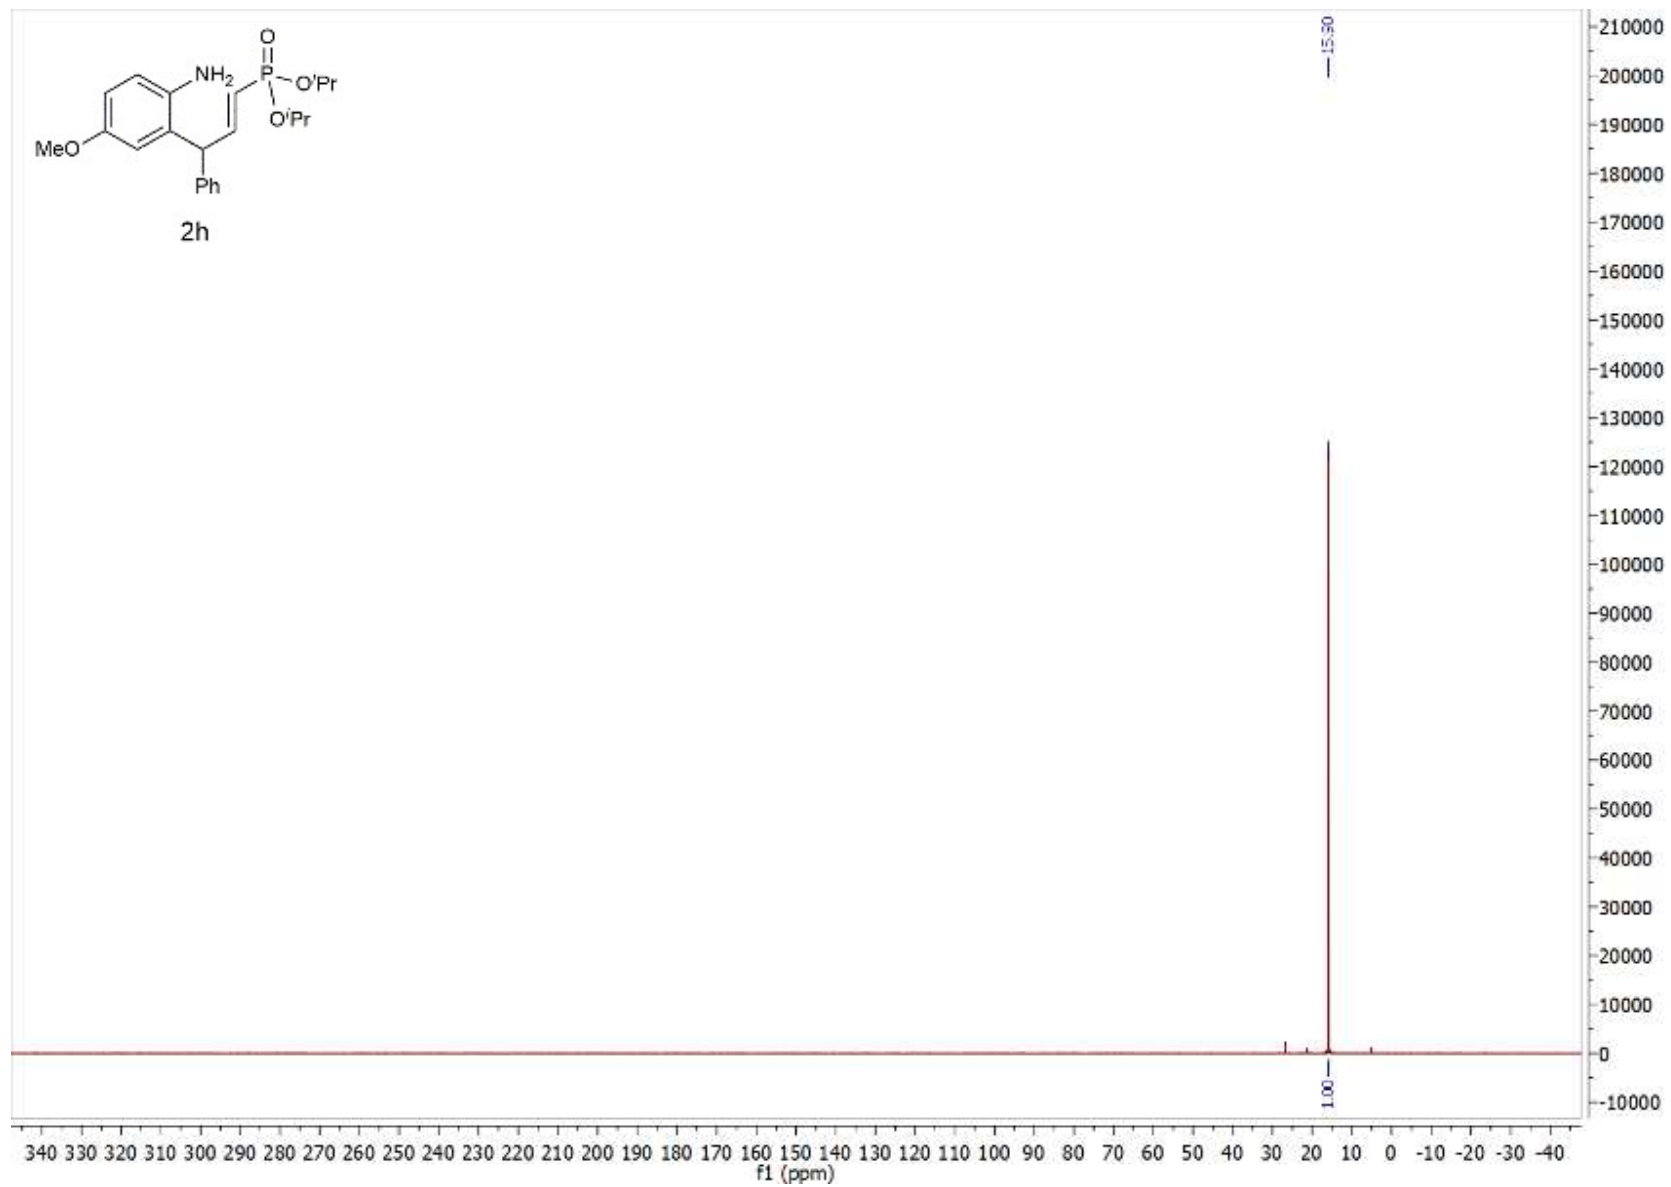

Figure S111:  $^{31}\text{P}$  NMR Spectra of **2h**



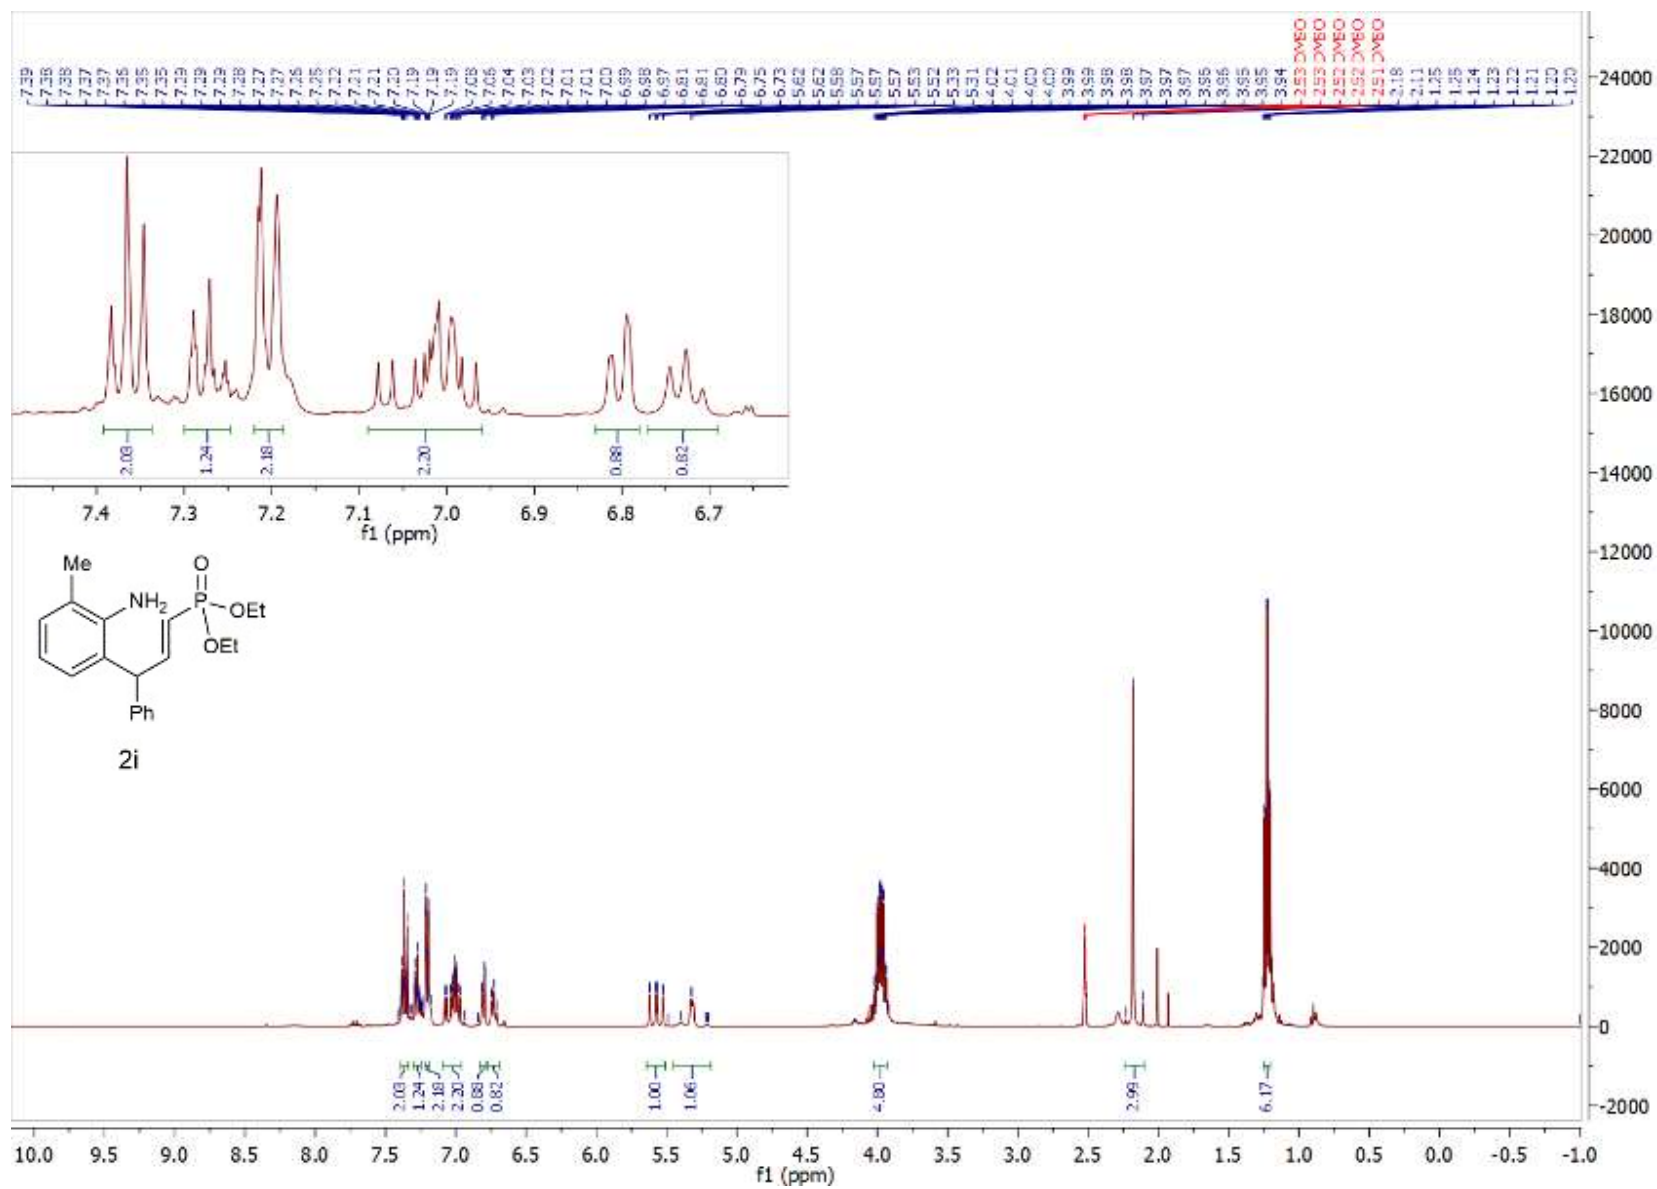

Figure S112:  $^1\text{H}$  NMR Spectra of **2i**

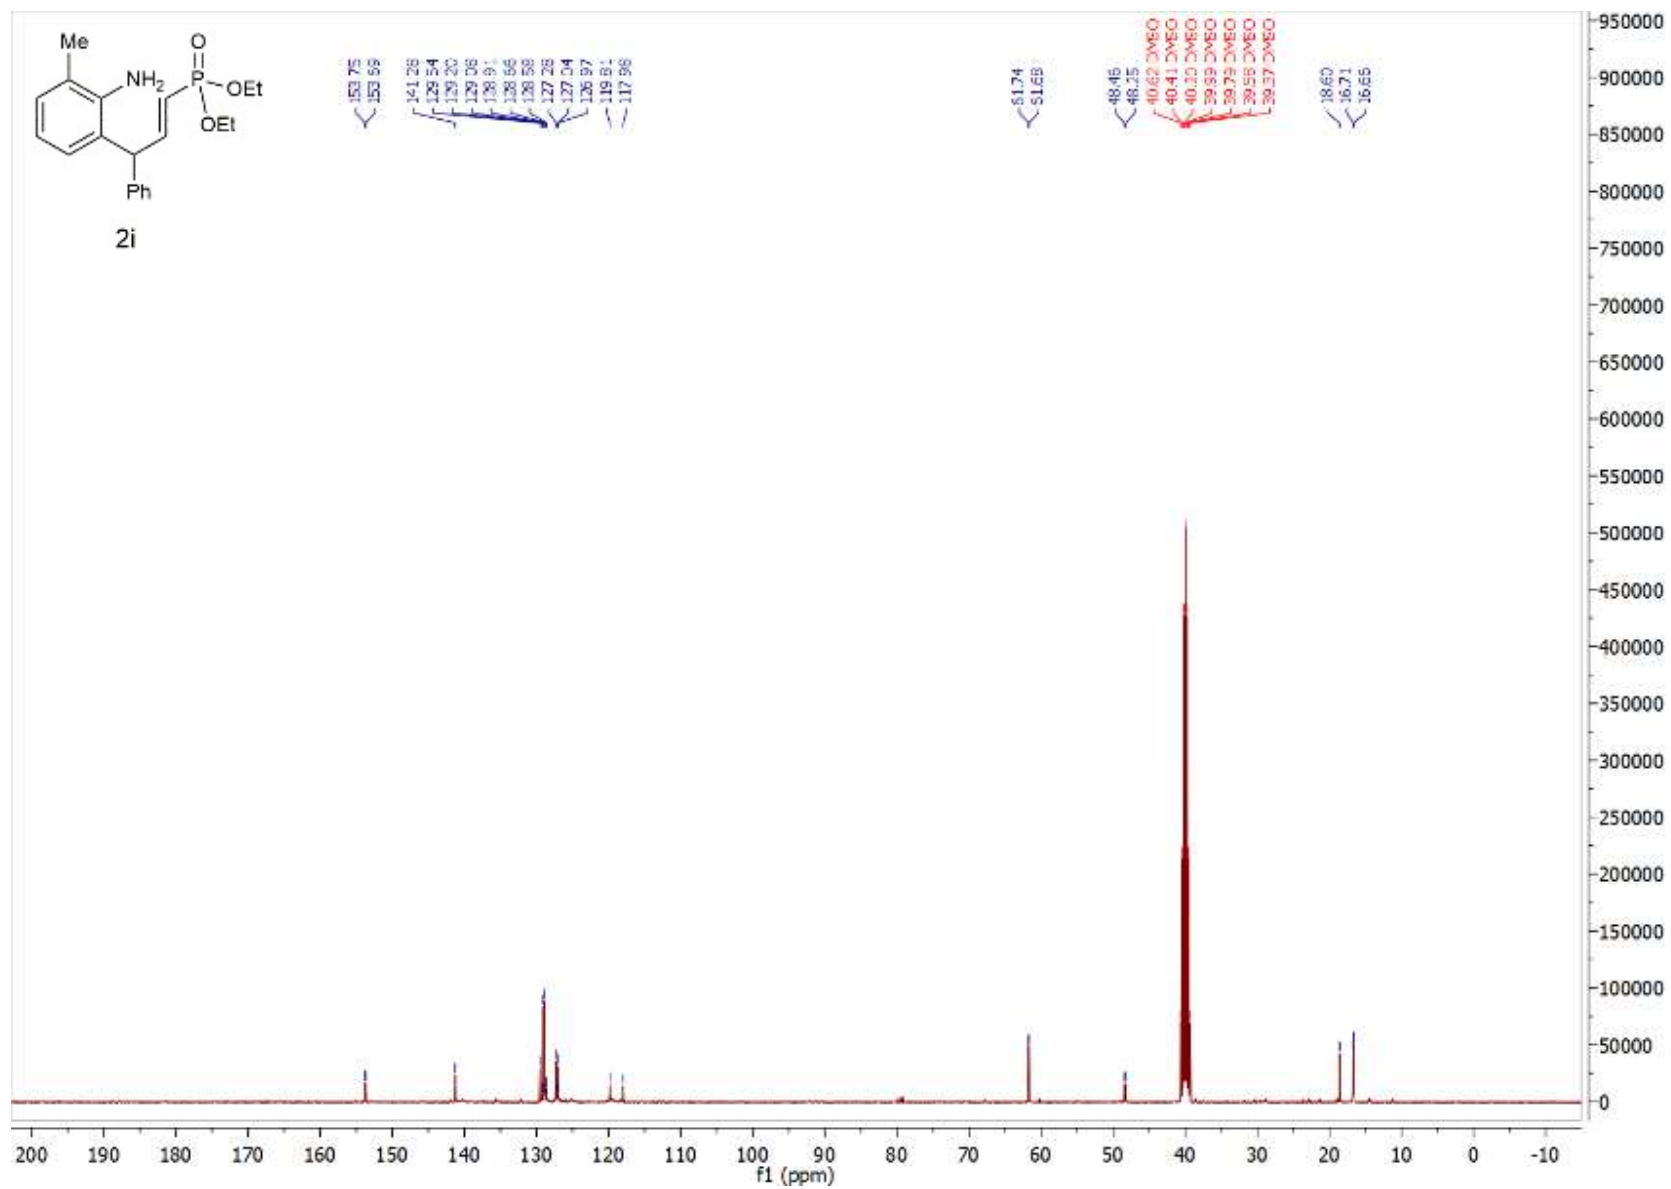

Figure S113: <sup>13</sup>C NMR Spectra of 2i

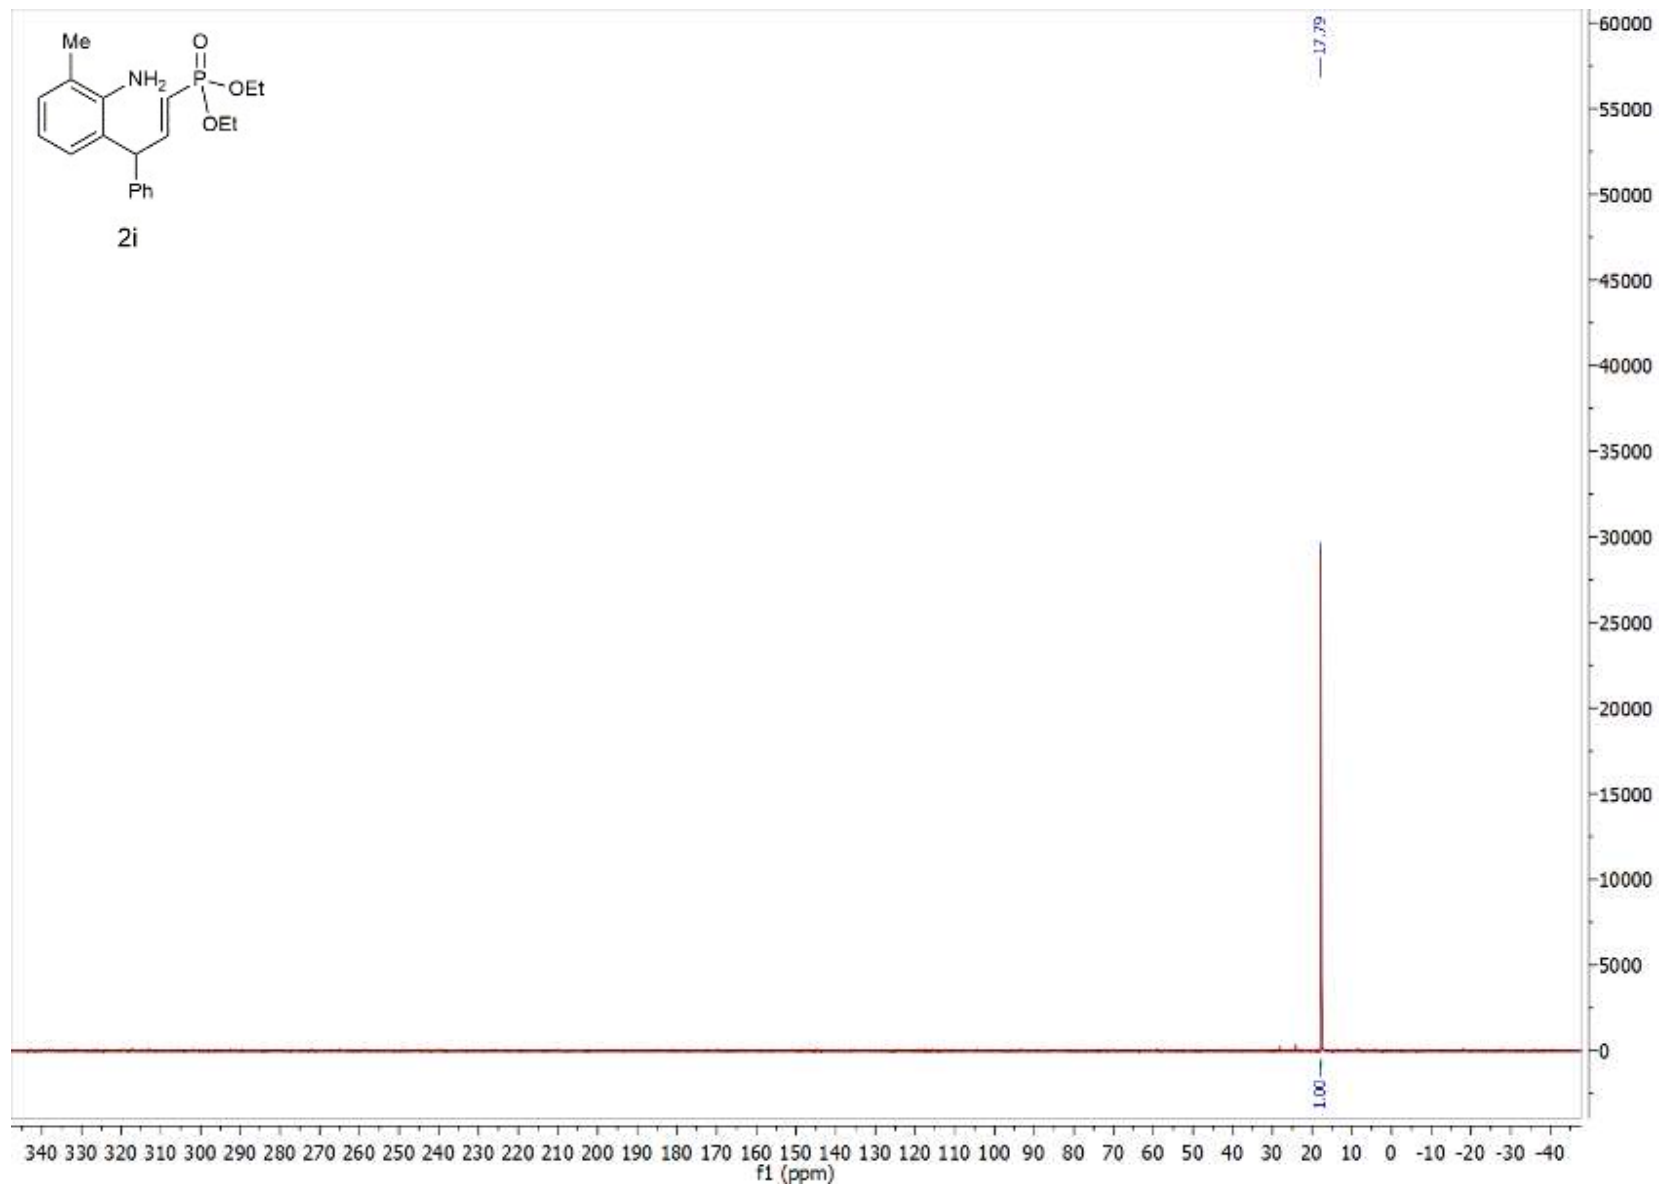

Figure S114:  $^{31}\text{P}$  NMR Spectra of **2i**



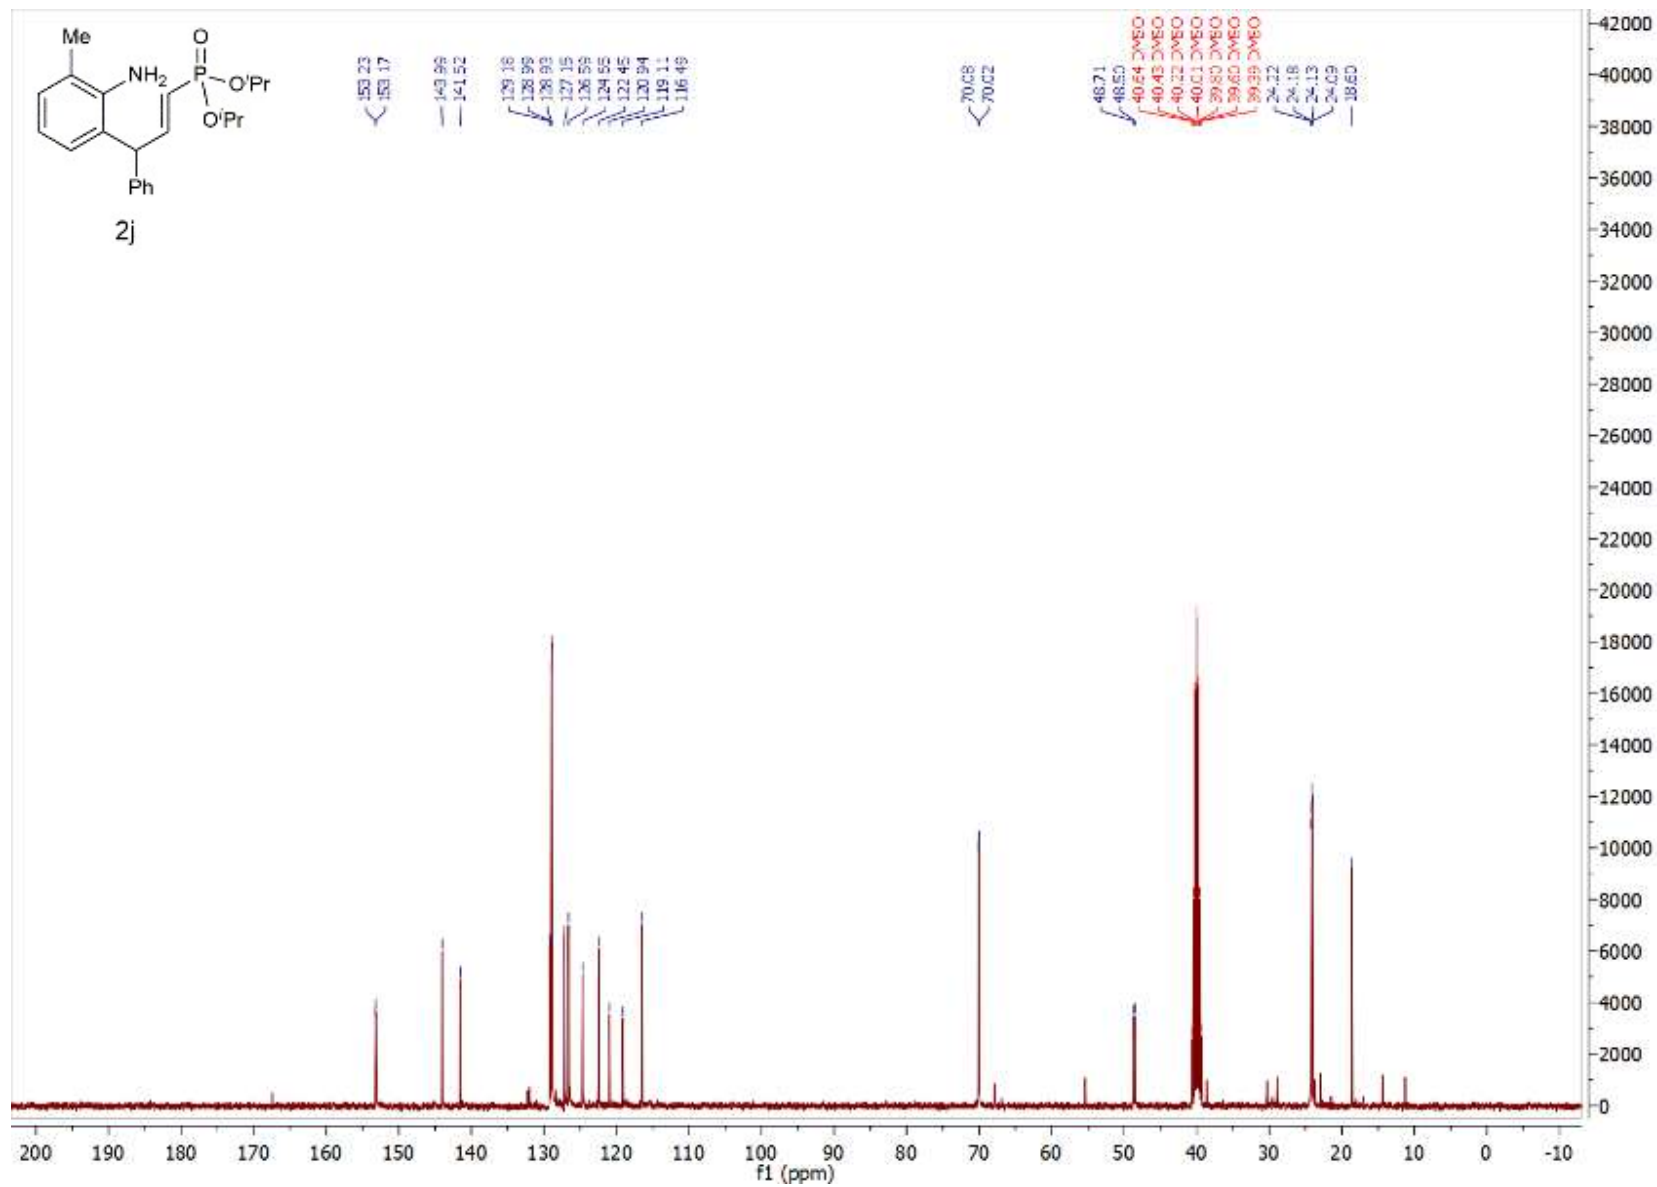

Figure S116:  $^{13}\text{C}$  NMR Spectra of 2j

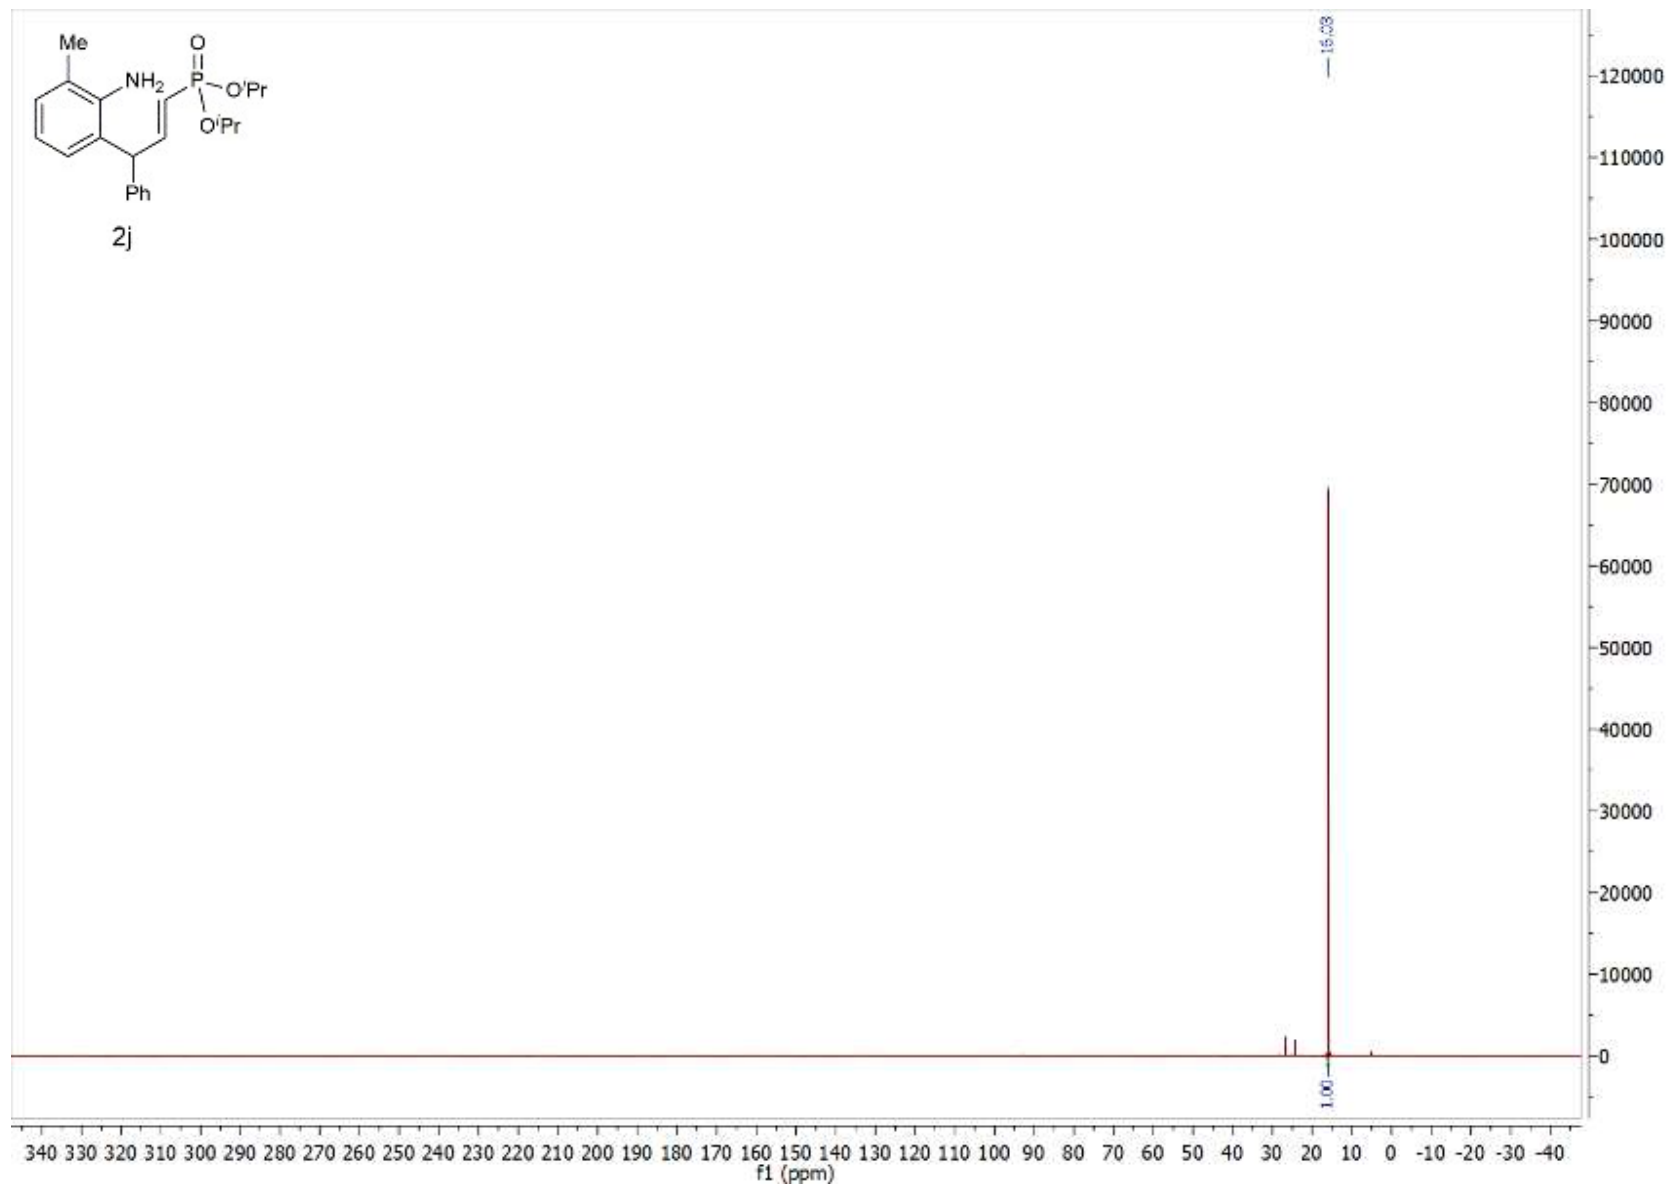

Figure S117:  $^{31}\text{P}$  NMR Spectra of **2j**

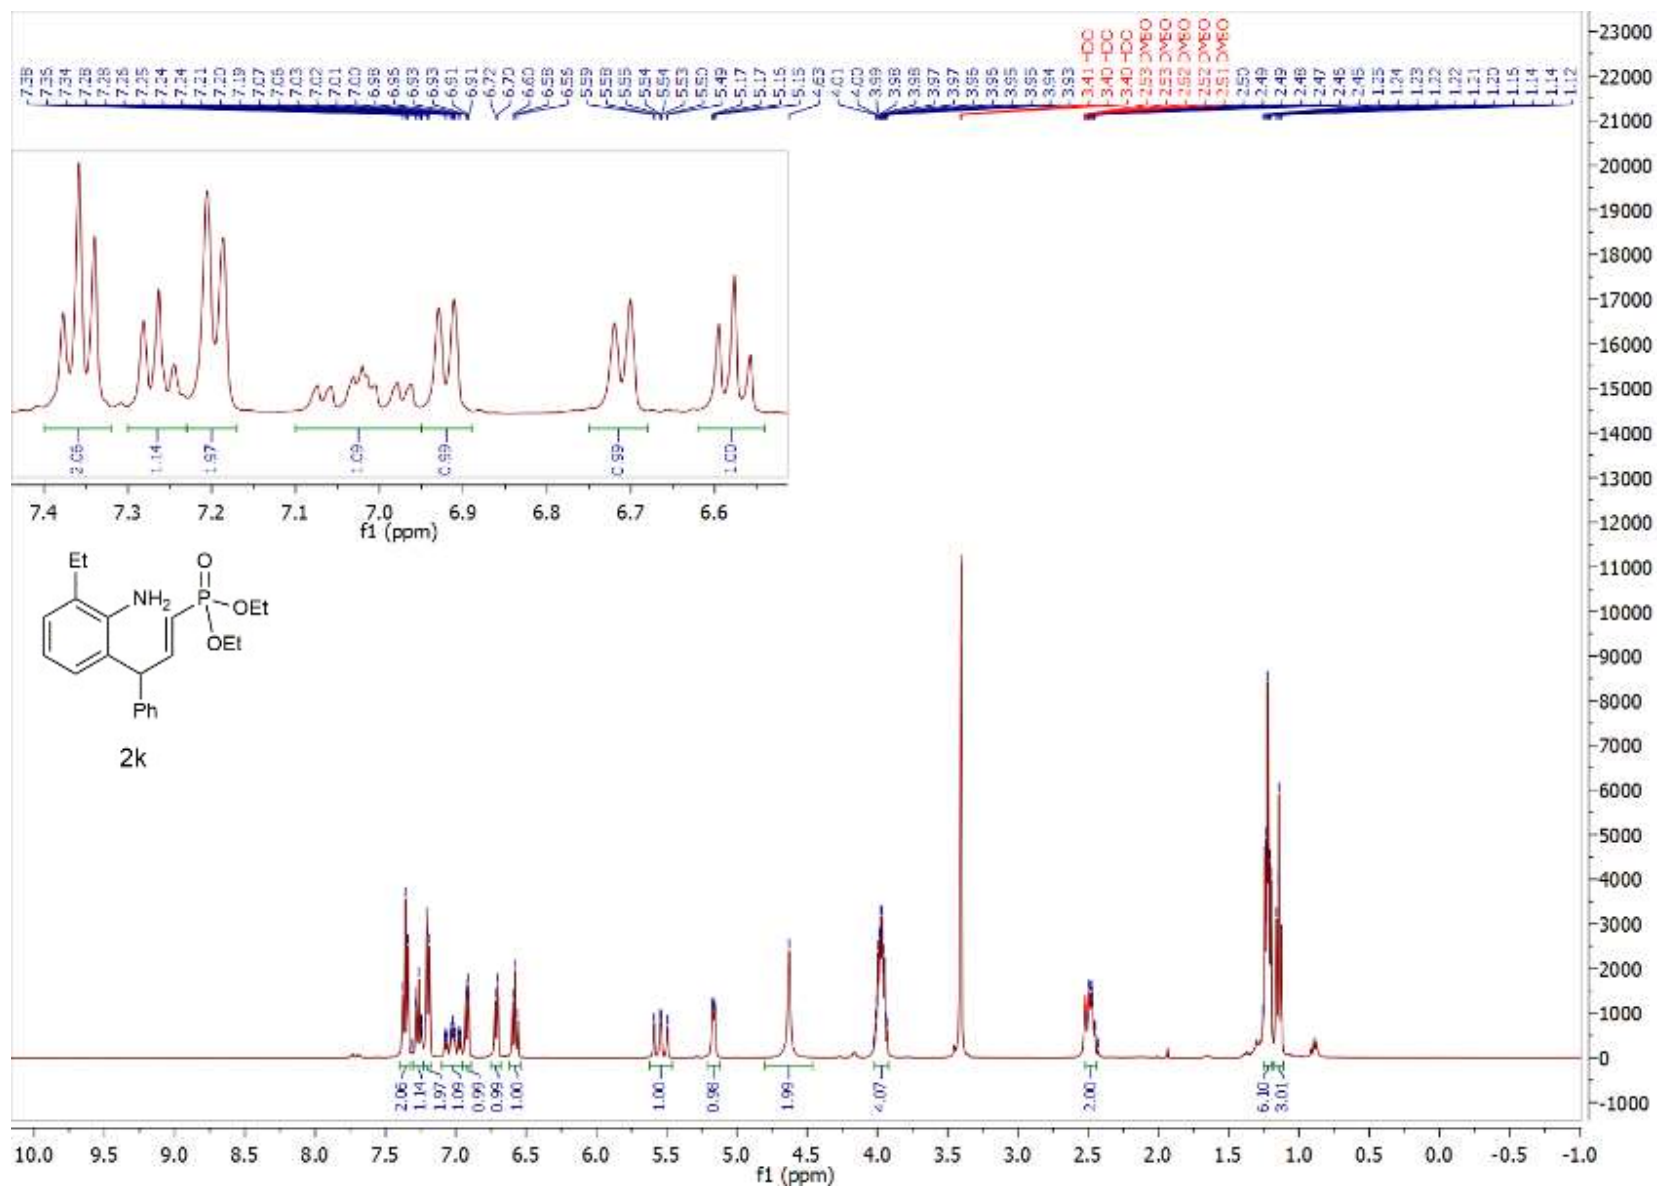

Figure S118: <sup>1</sup>H NMR Spectra of 2k

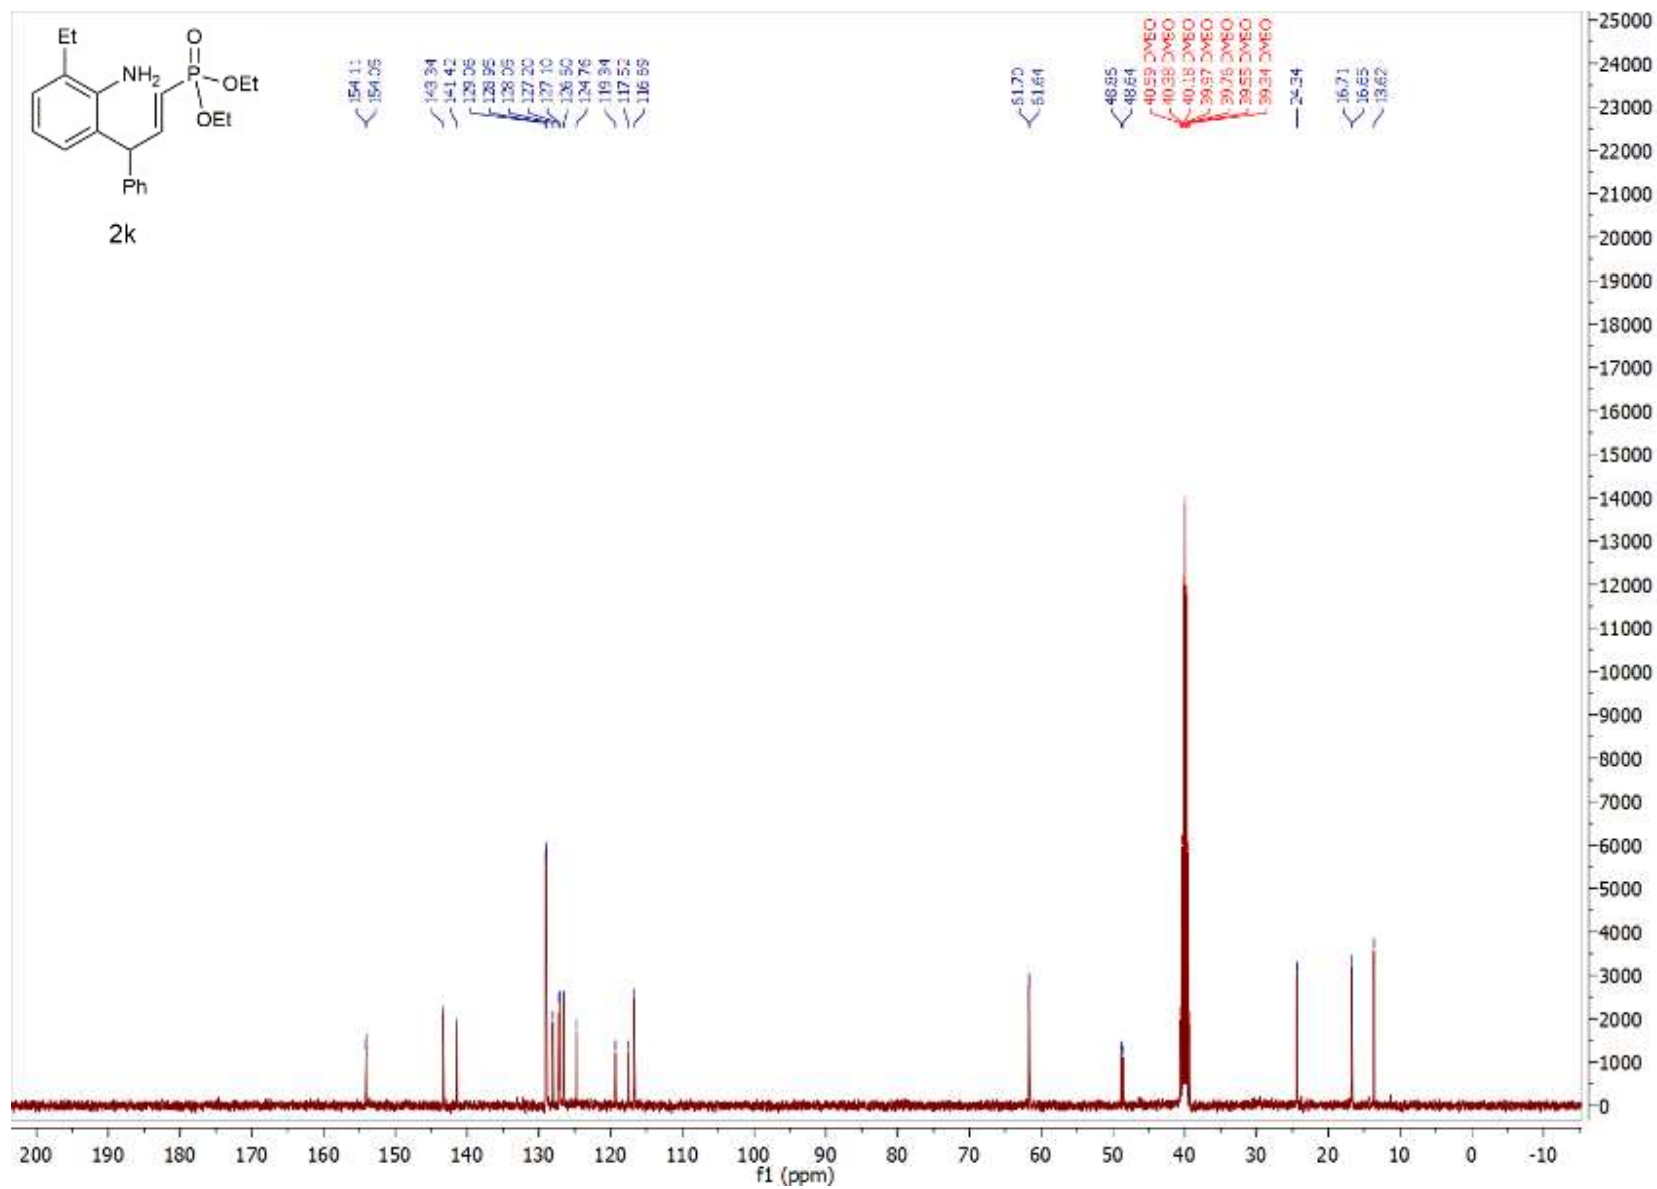

Figure S119: <sup>13</sup>C NMR Spectra of 2k



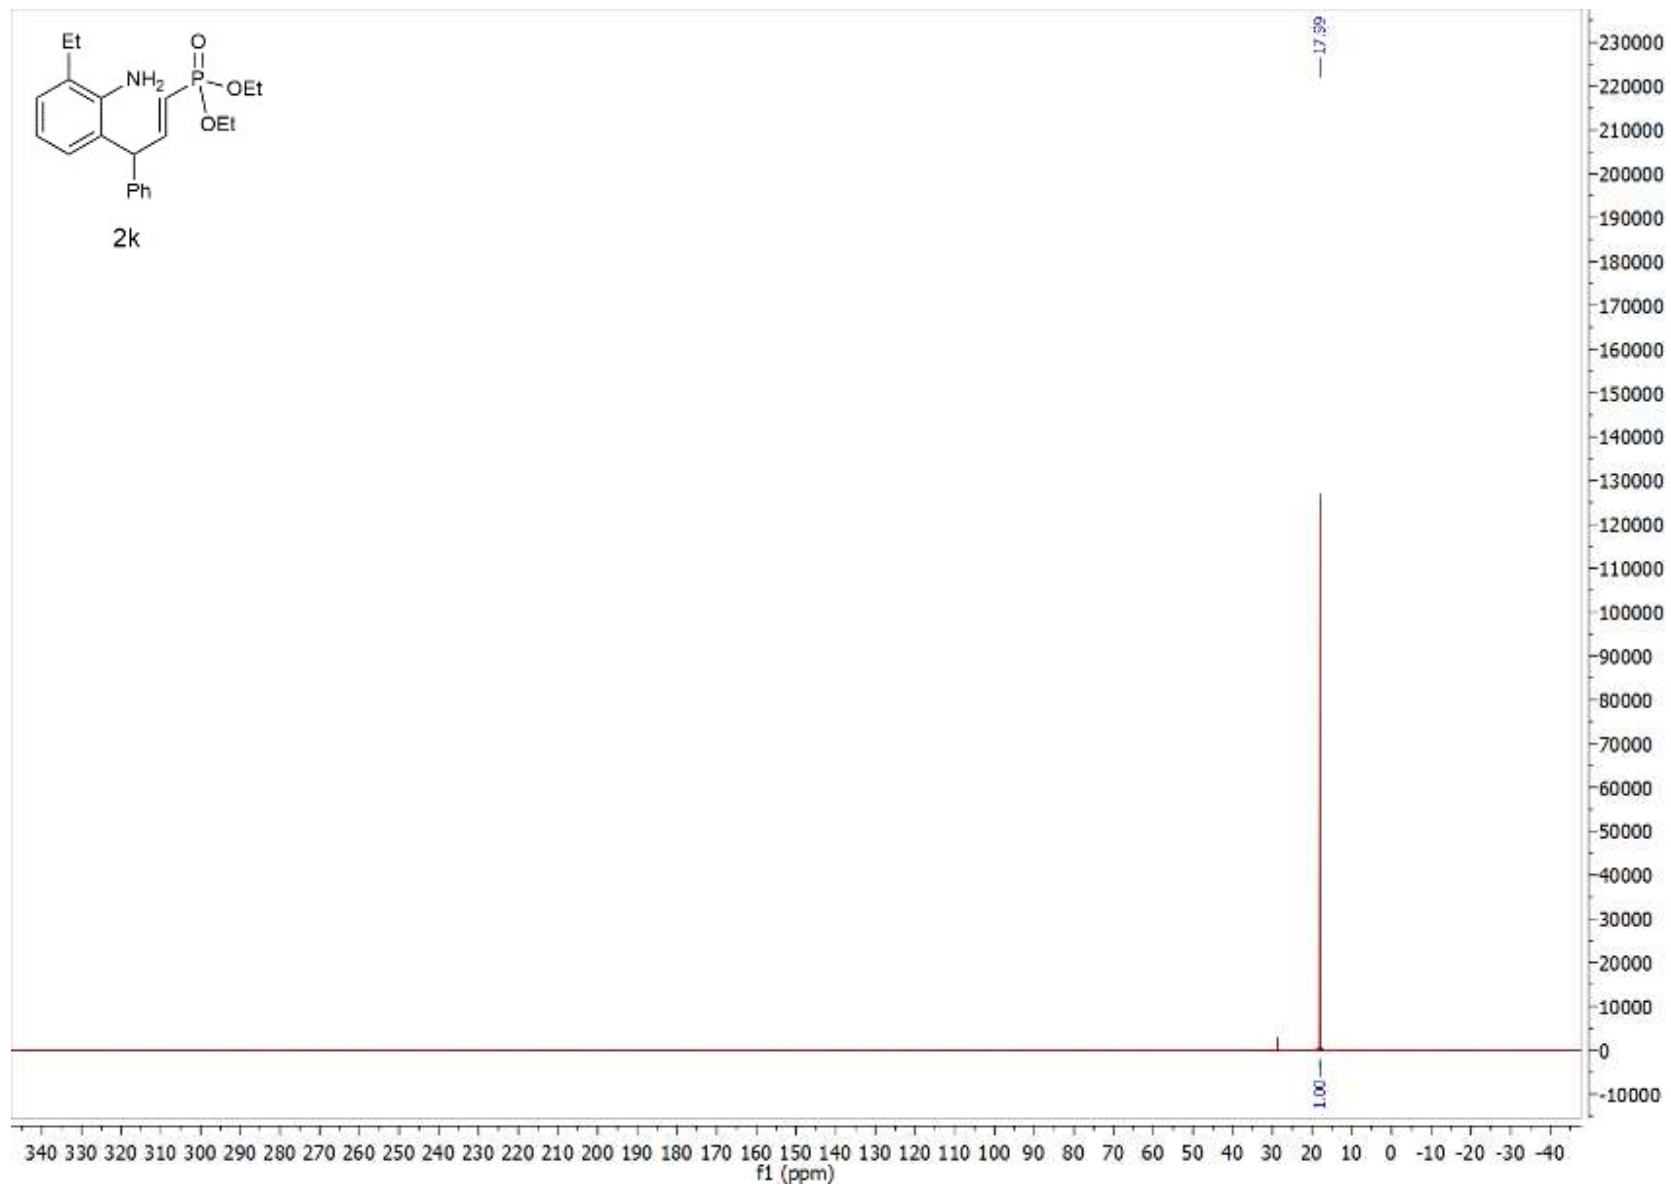

Figure S120:  $^{31}\text{P}$  NMR Spectra of 2k

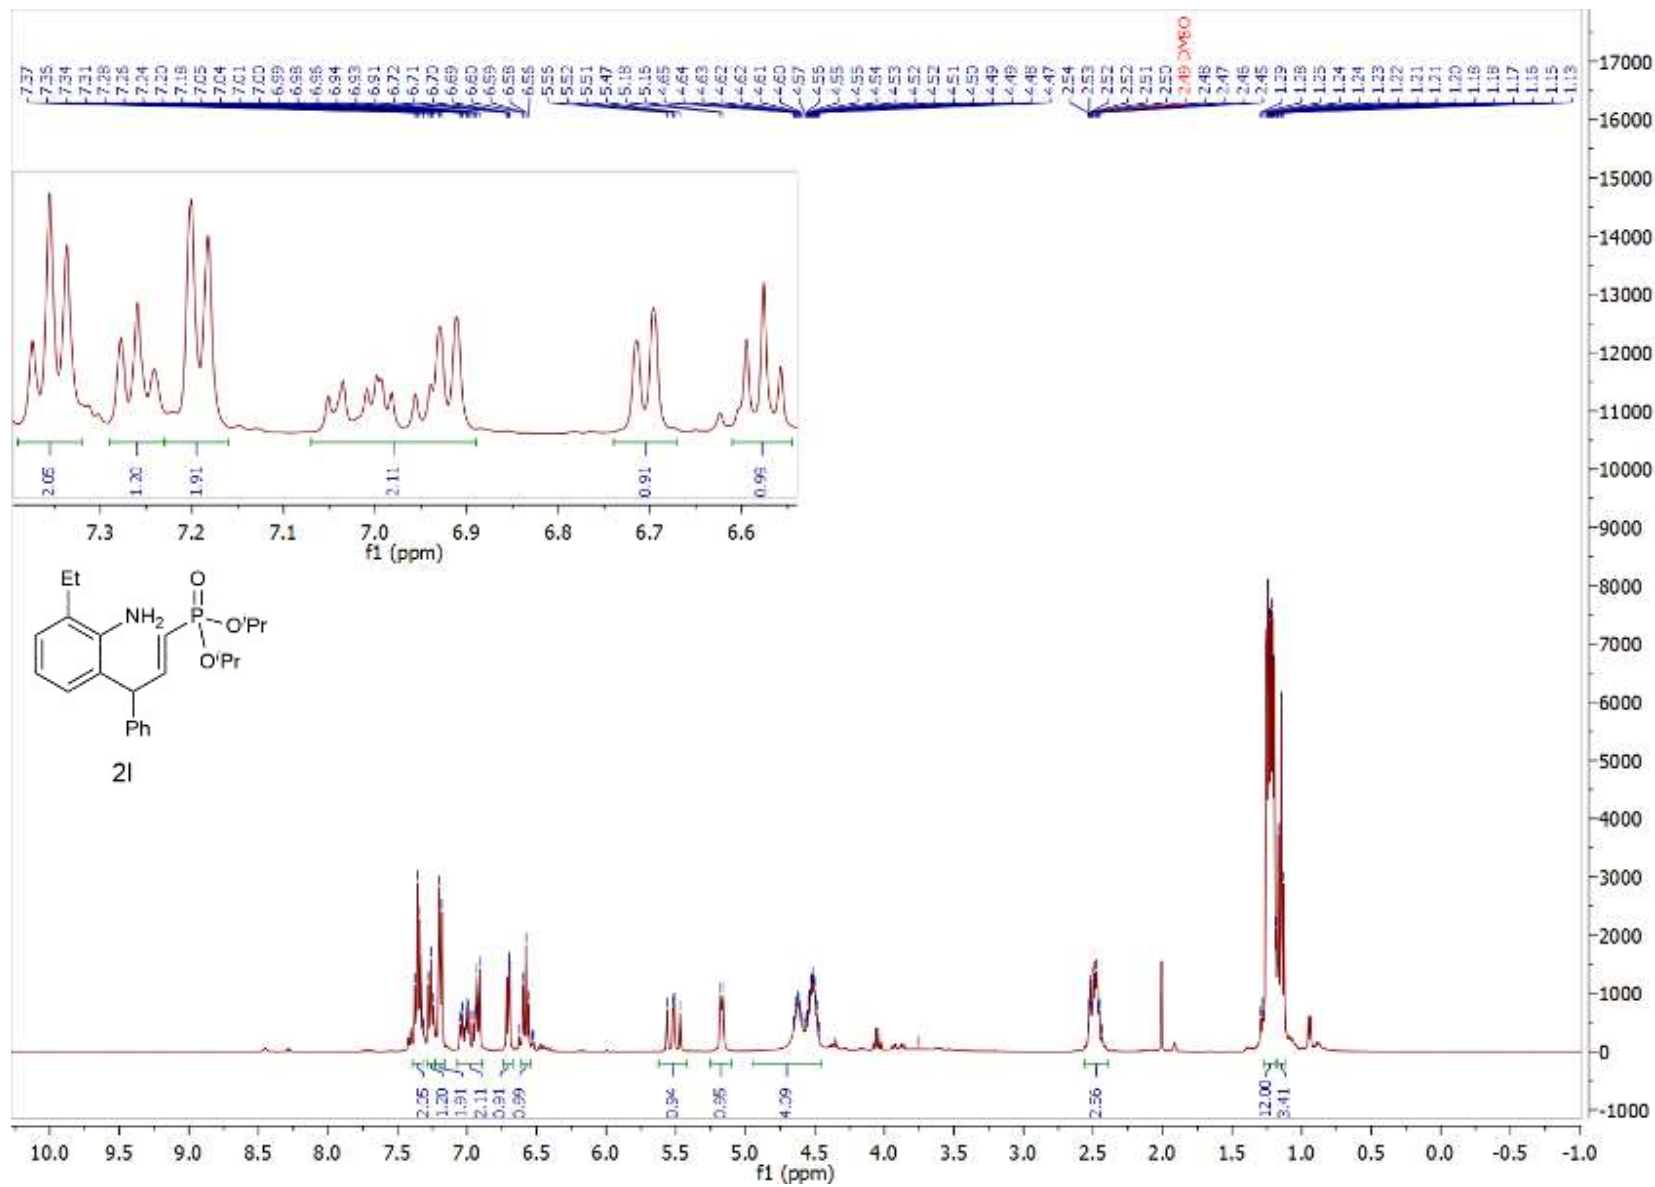

Figure S121: <sup>1</sup>H NMR Spectra of 2I

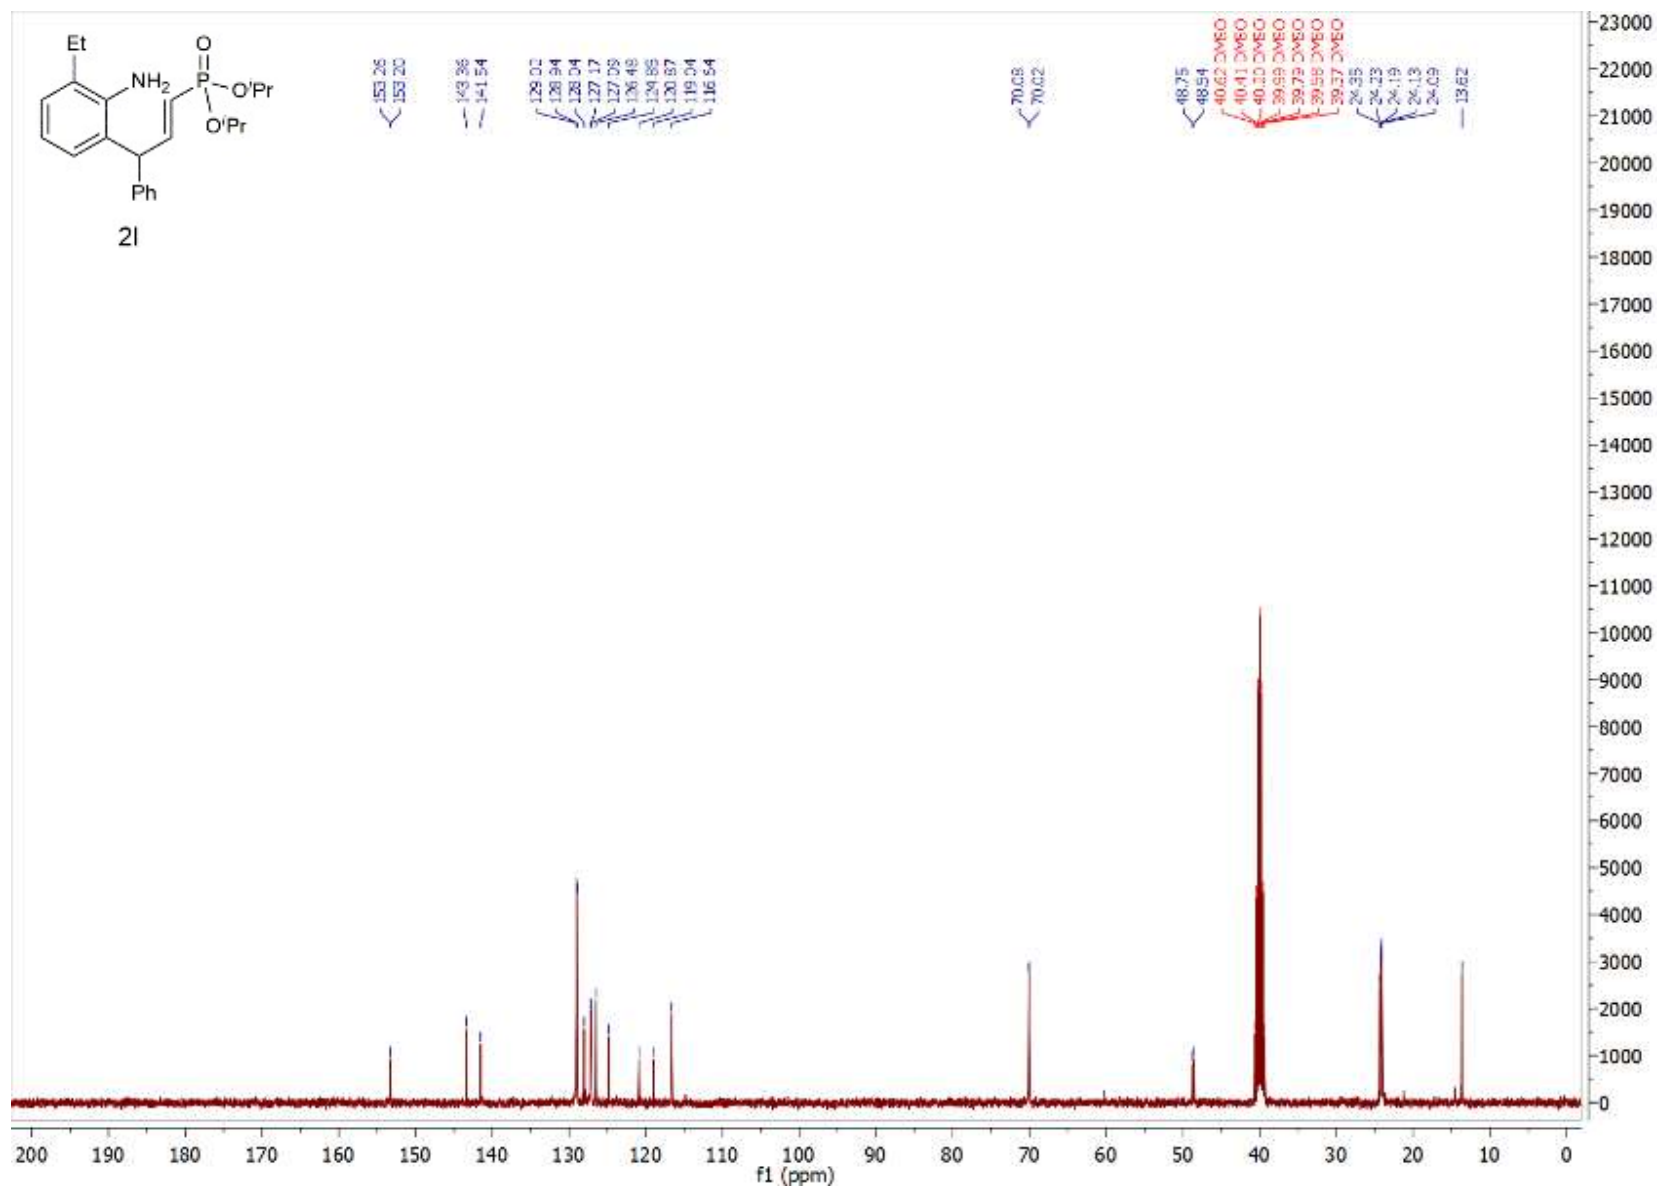

Figure S122: <sup>13</sup>C NMR Spectra of 2I

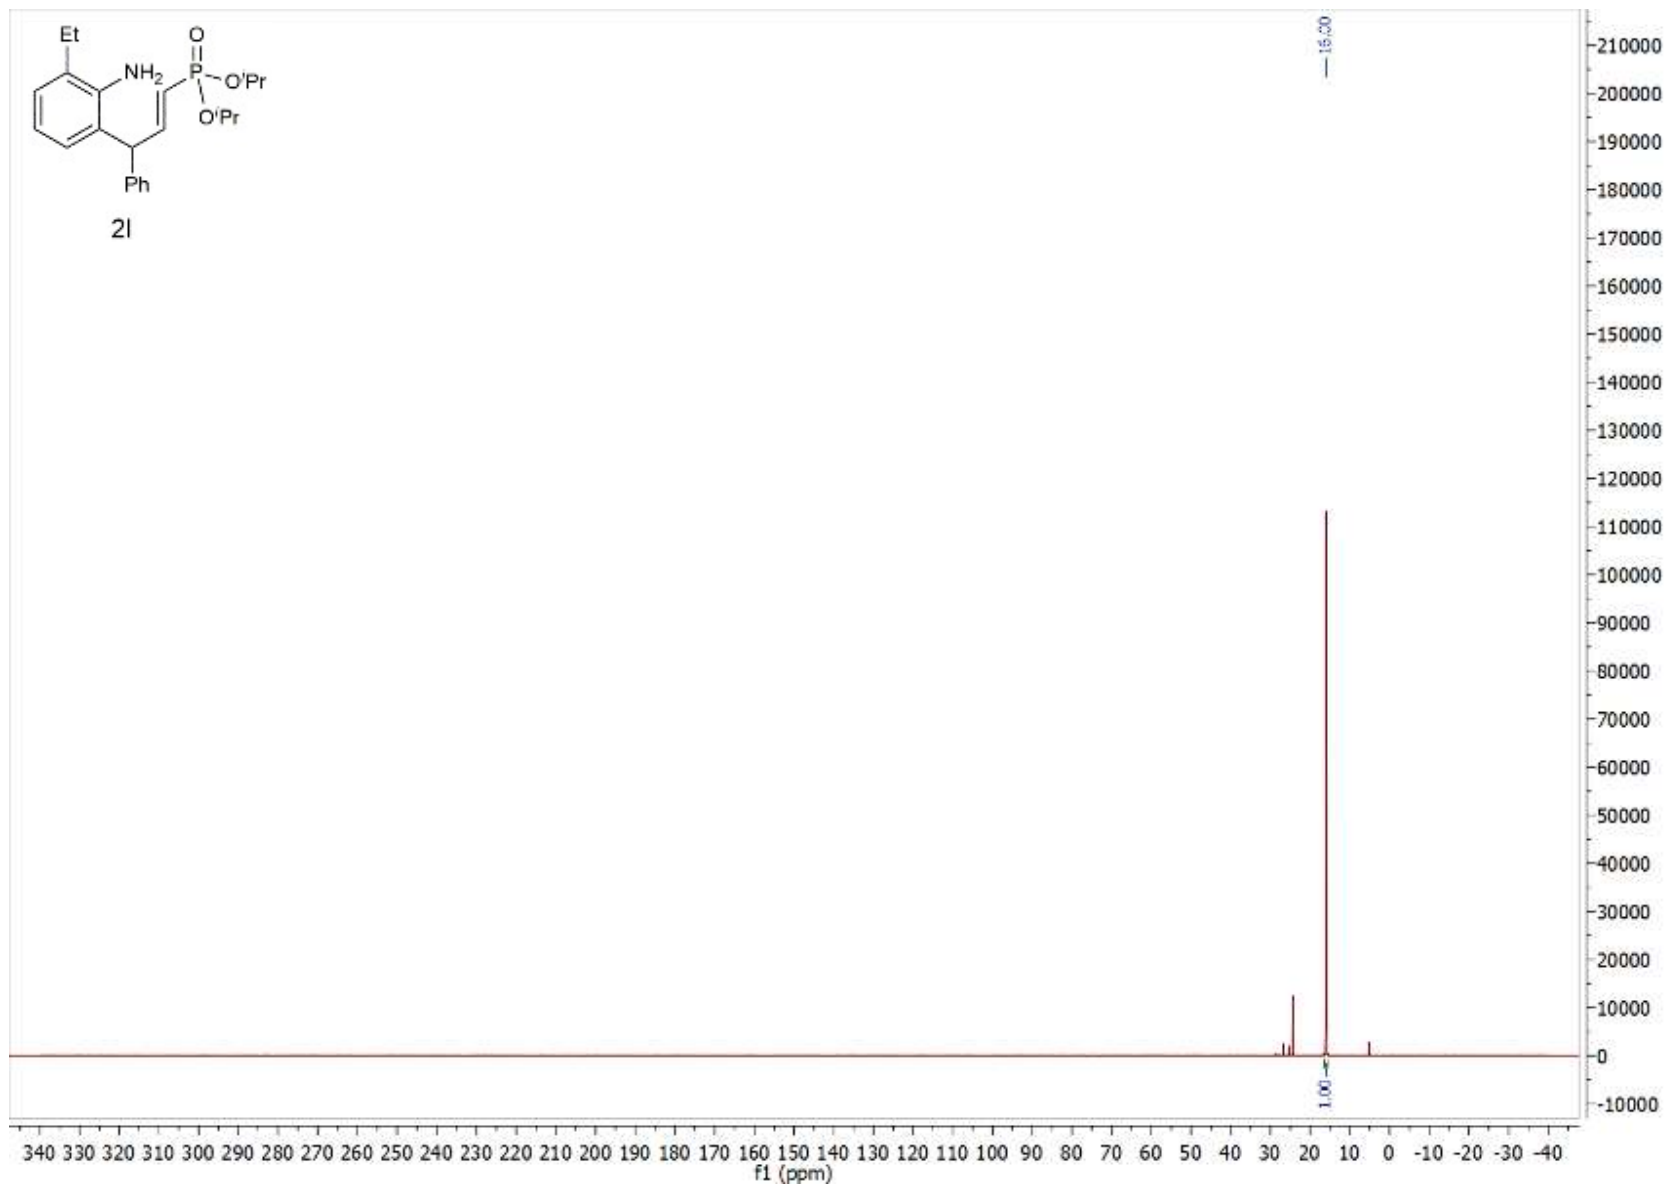

Figure S123:  $^{31}\text{P}$  NMR Spectra of 2I

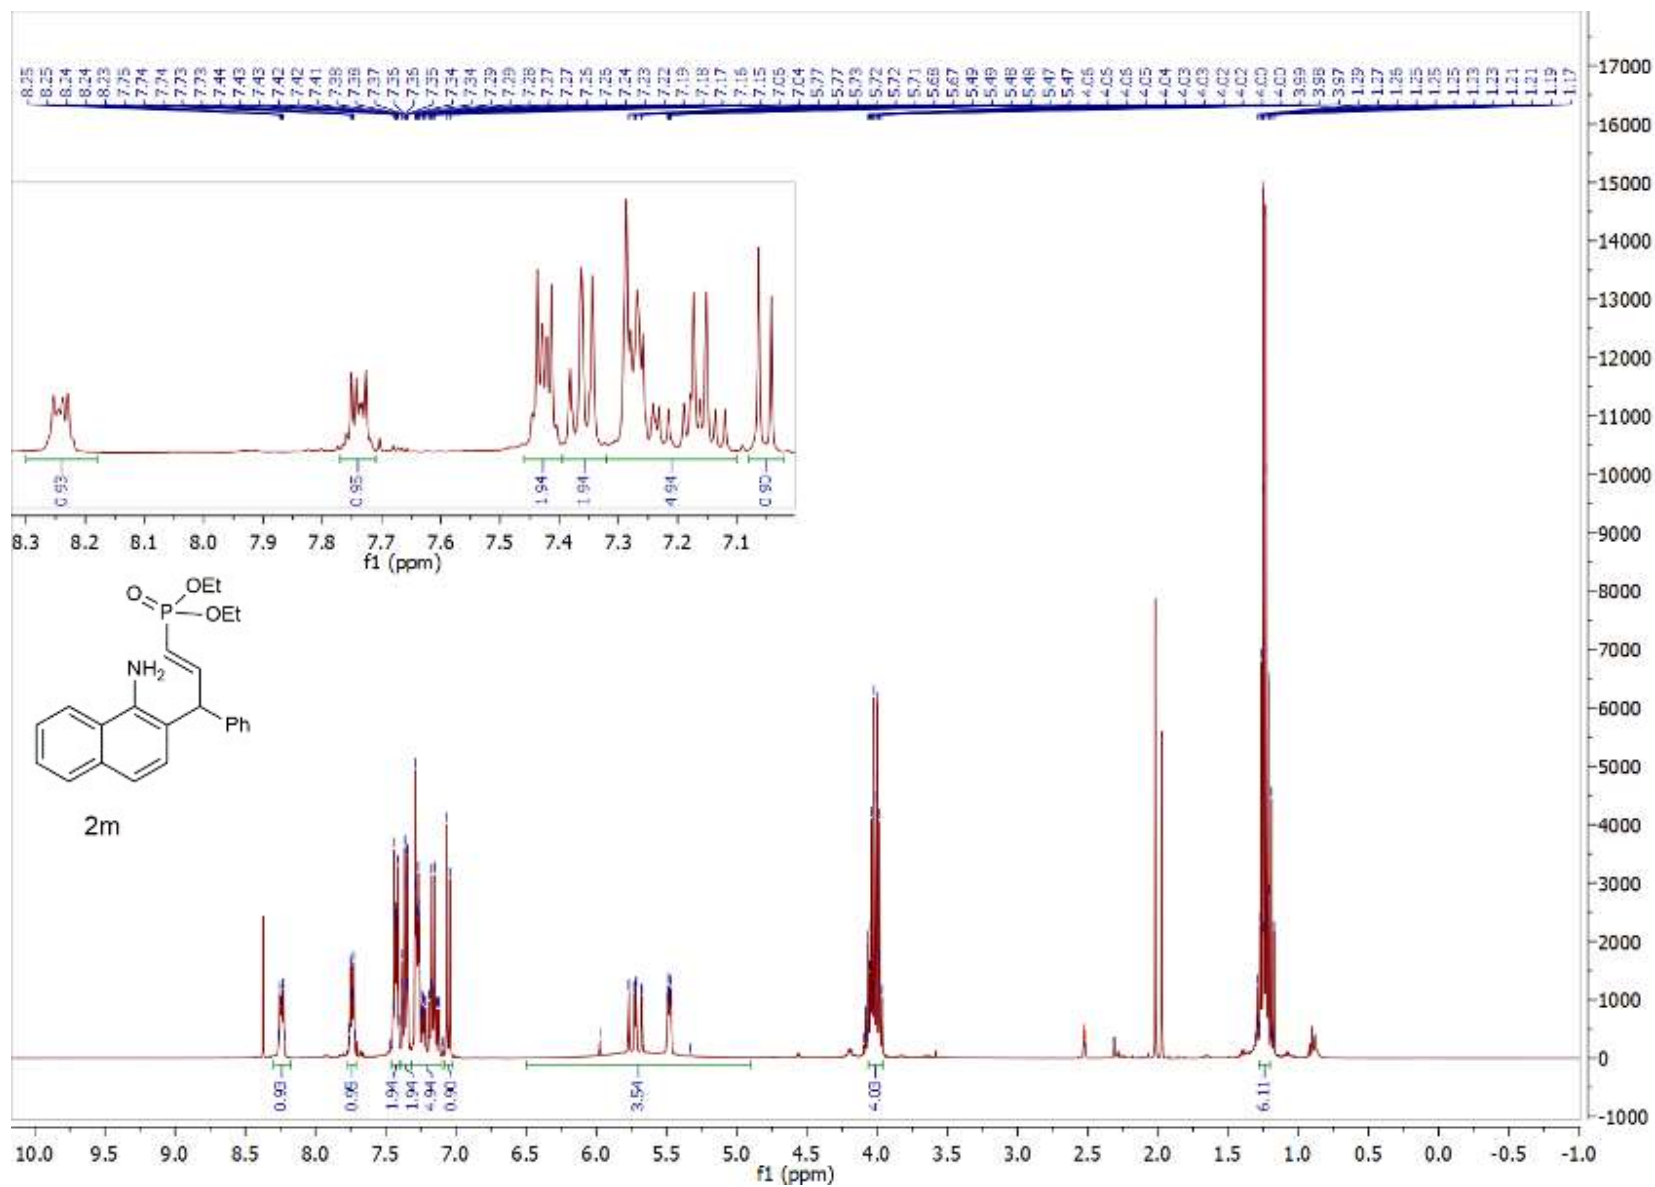

Figure S124: <sup>1</sup>H NMR Spectra of 2m

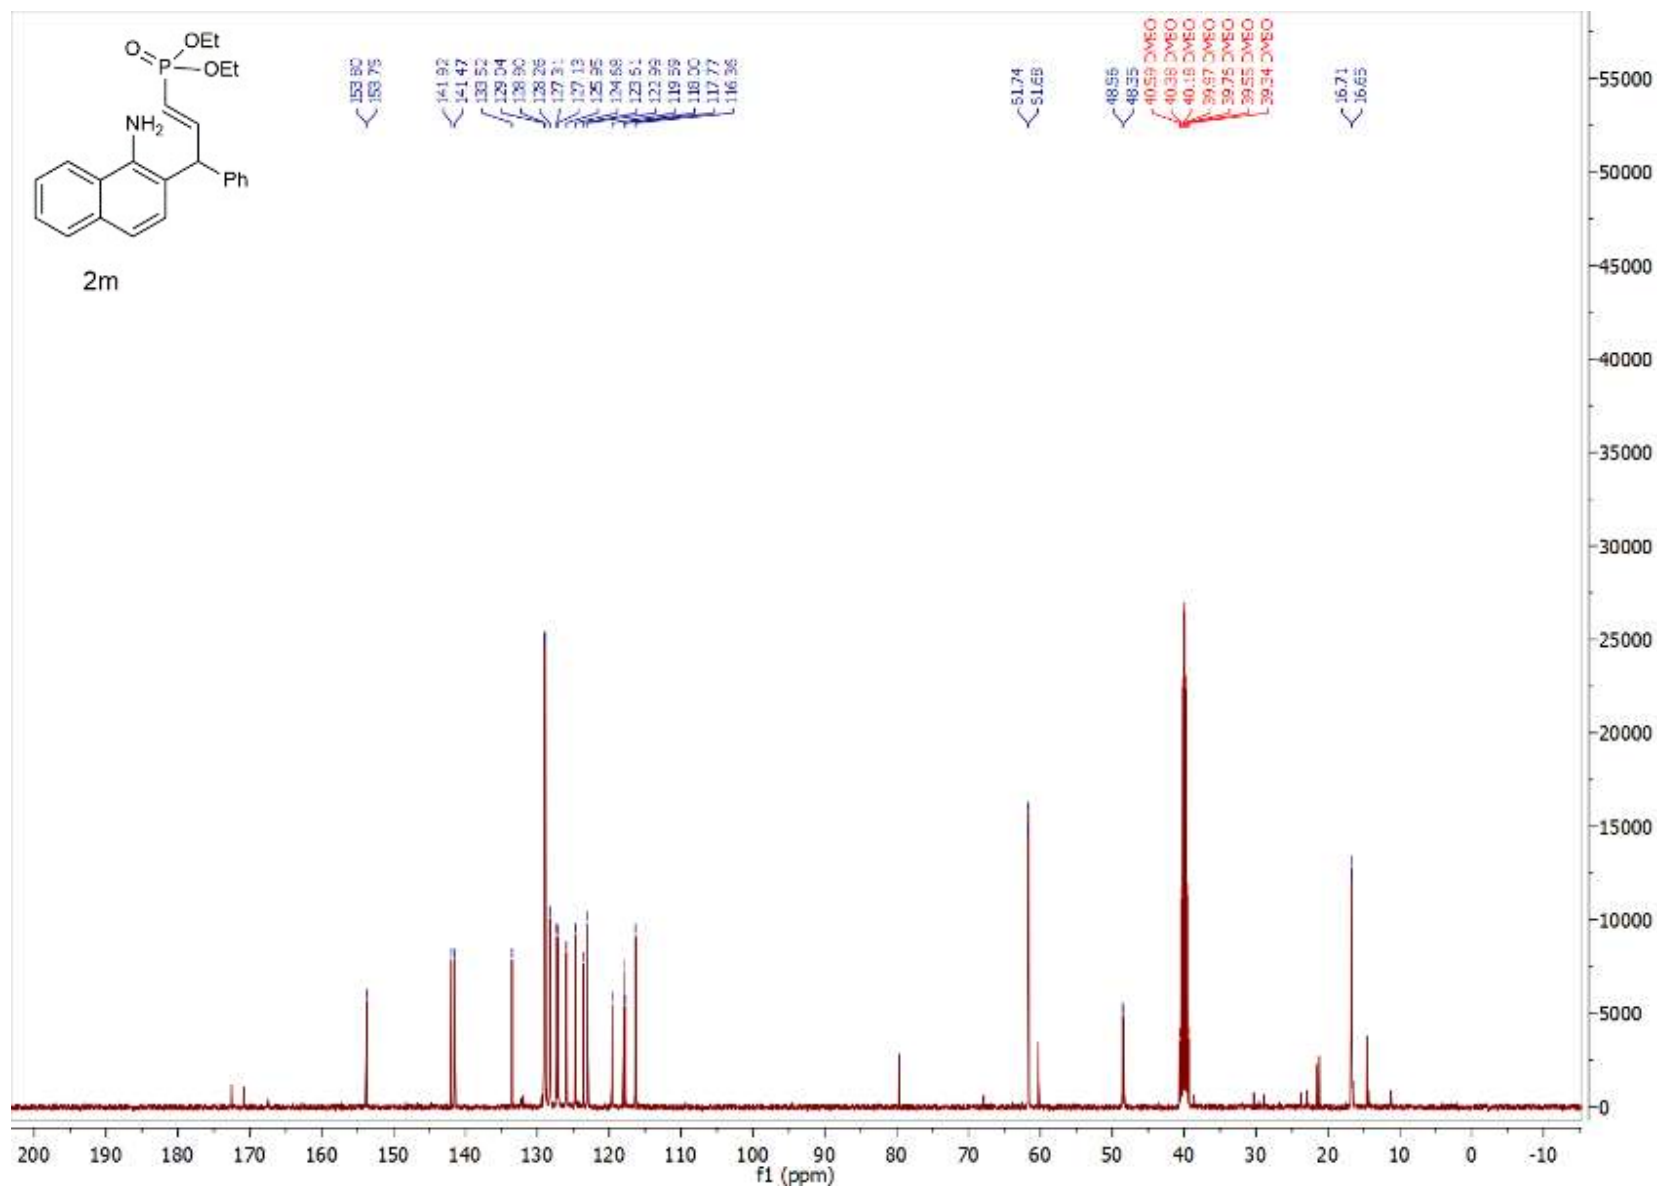

Figure S125: <sup>13</sup>C NMR Spectra of 2m

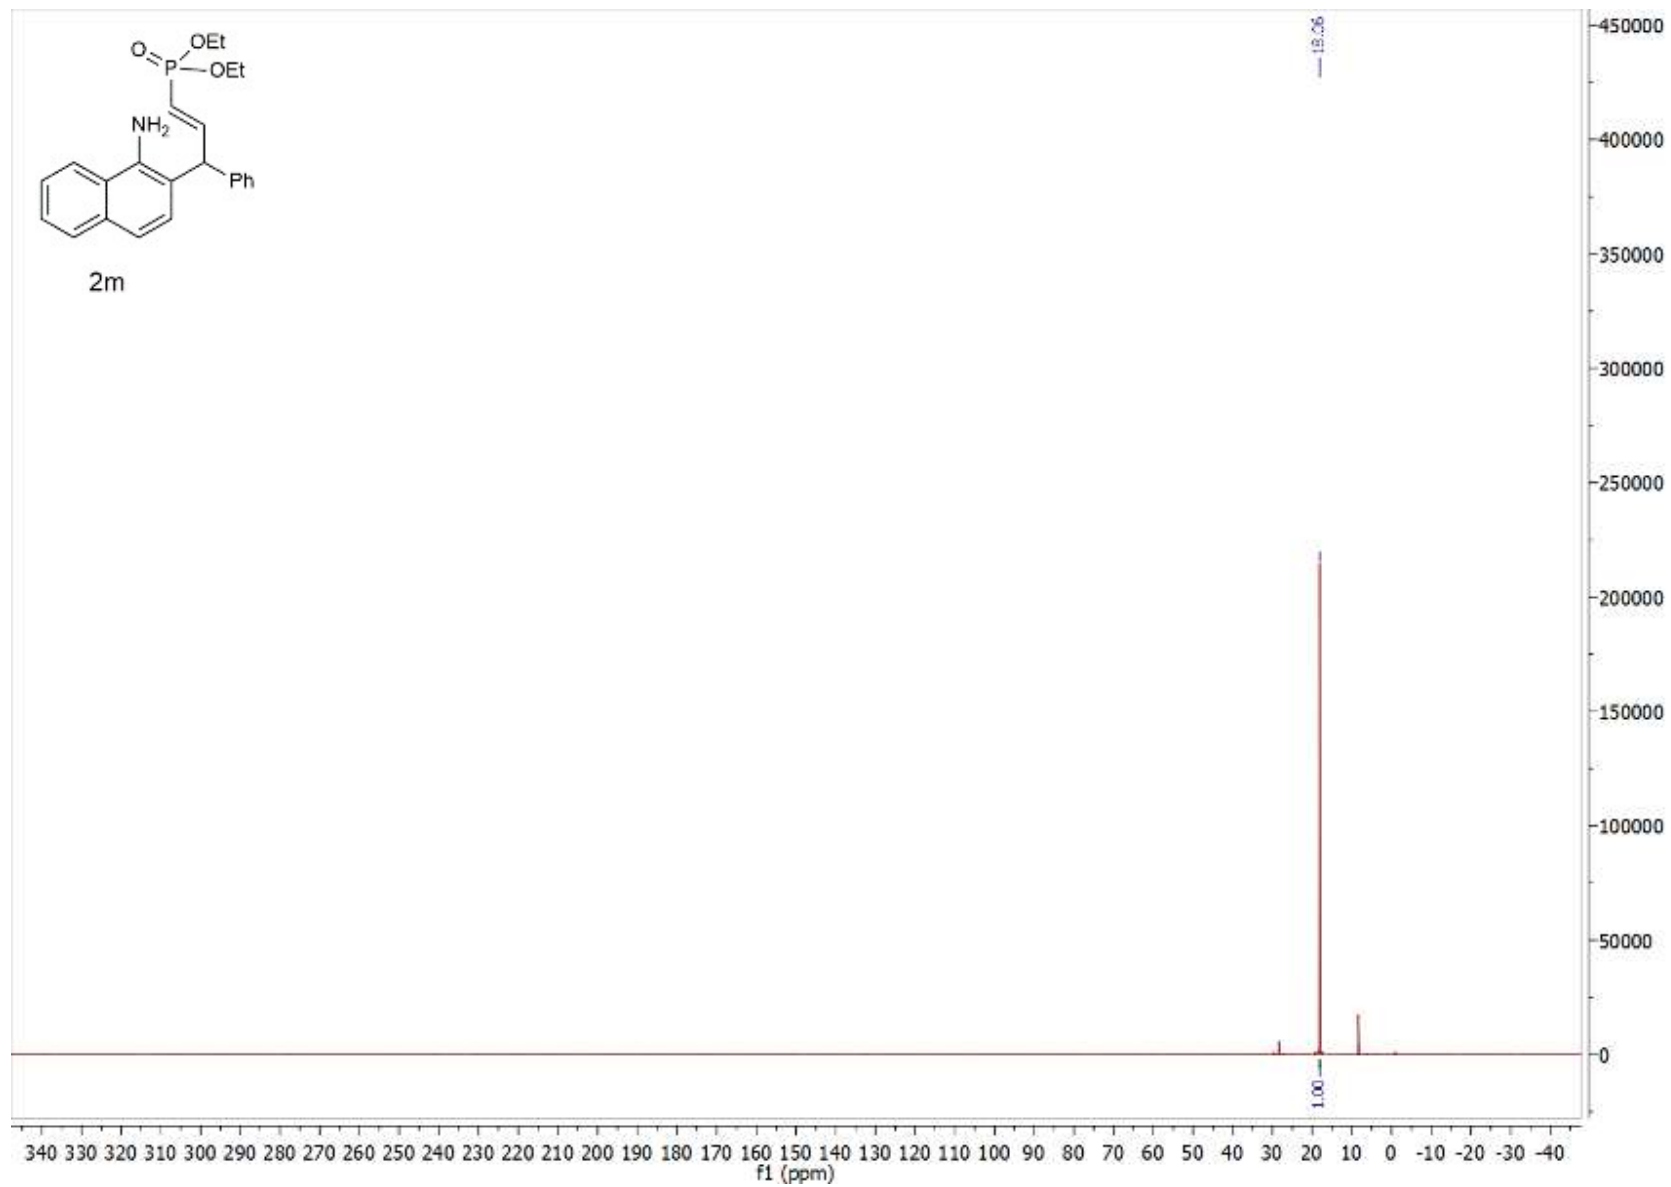

Figure S126:  $^{31}\text{P}$  NMR Spectra of 2m

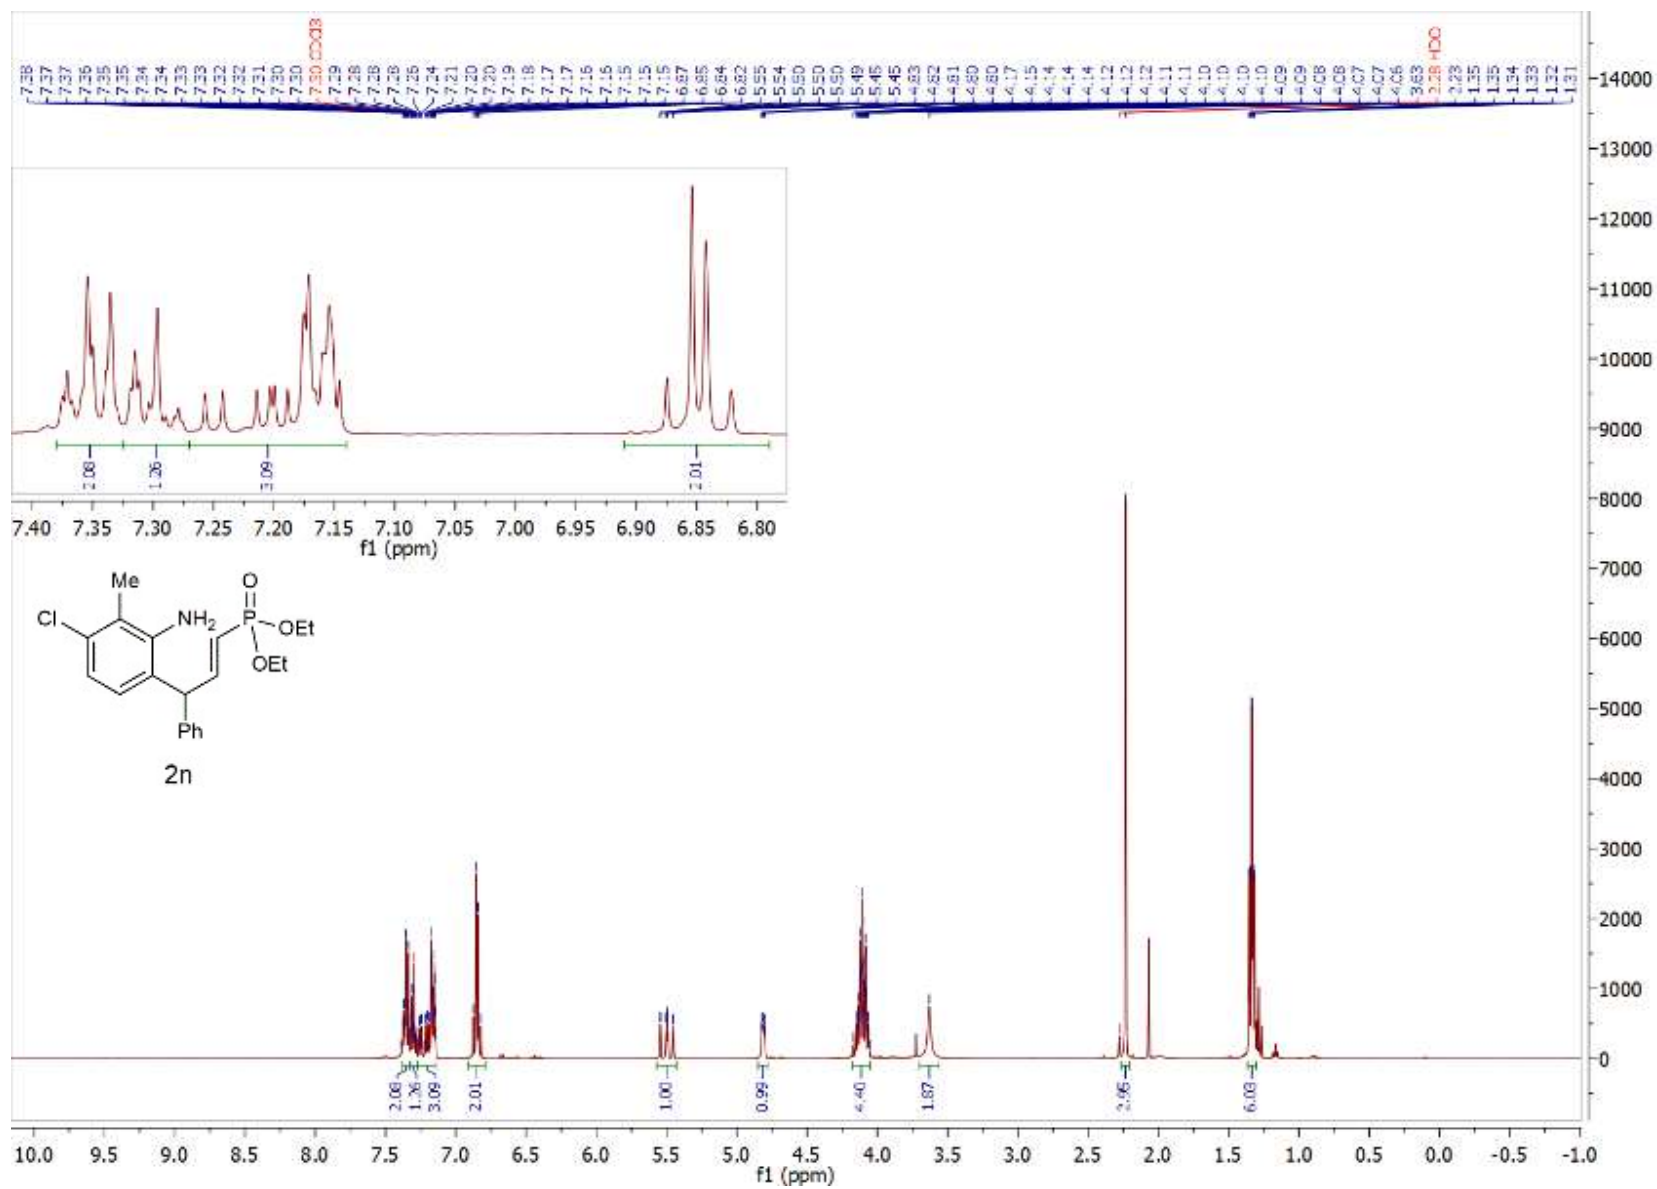

Figure S127: <sup>1</sup>H NMR Spectra of 2n



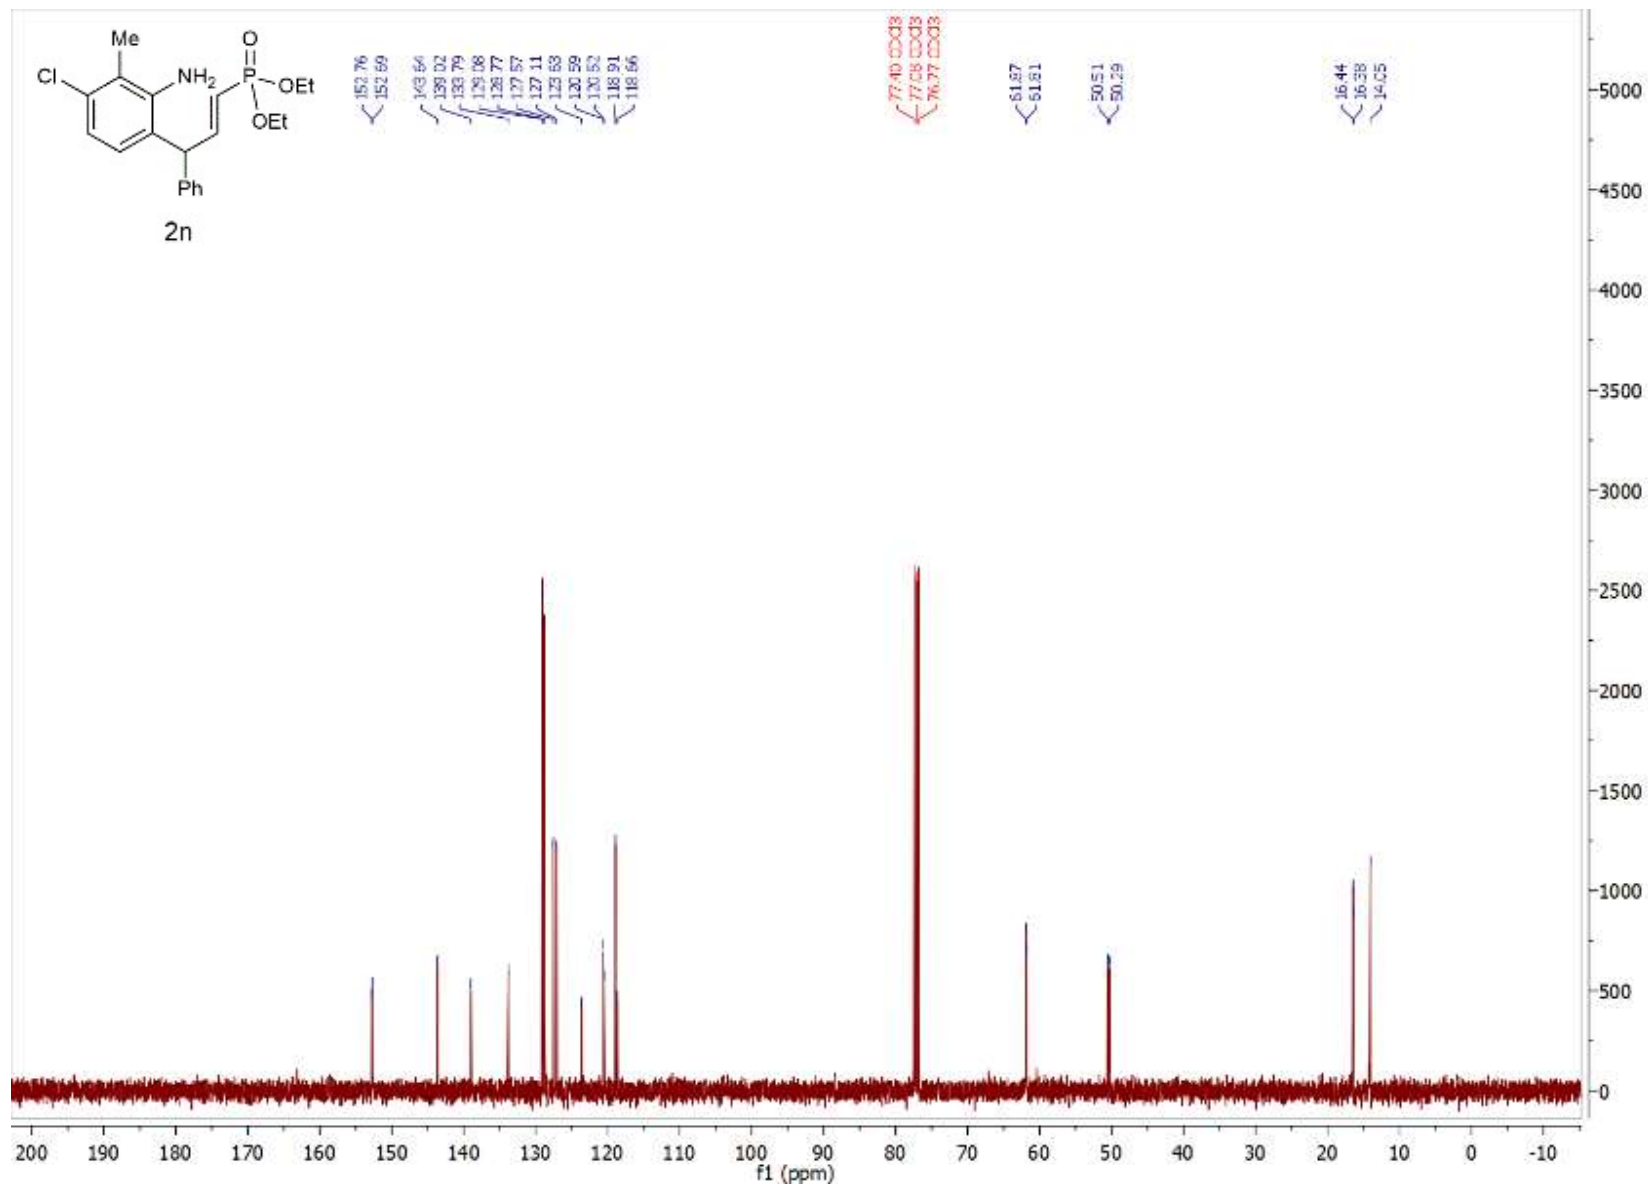

Figure S128: <sup>13</sup>C NMR Spectra of 2n

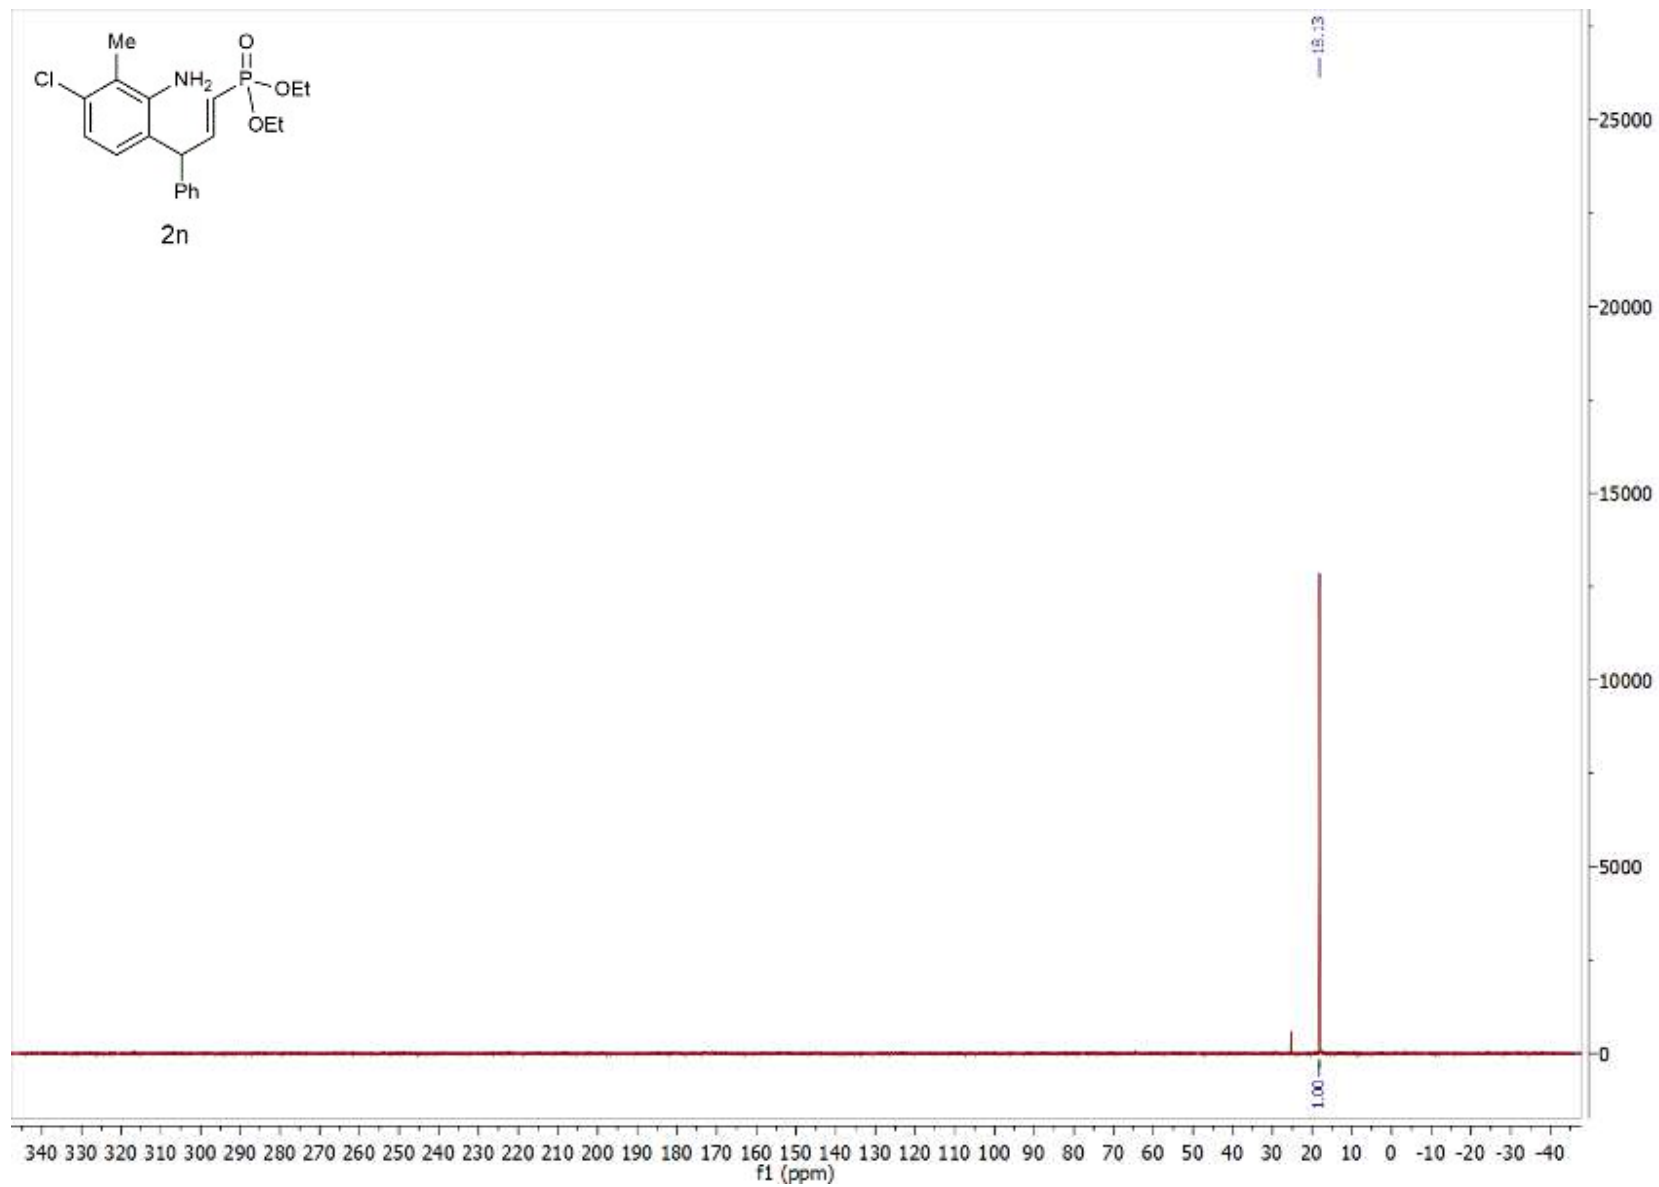

Figure S129:  $^{31}\text{P}$  NMR Spectra of 2n

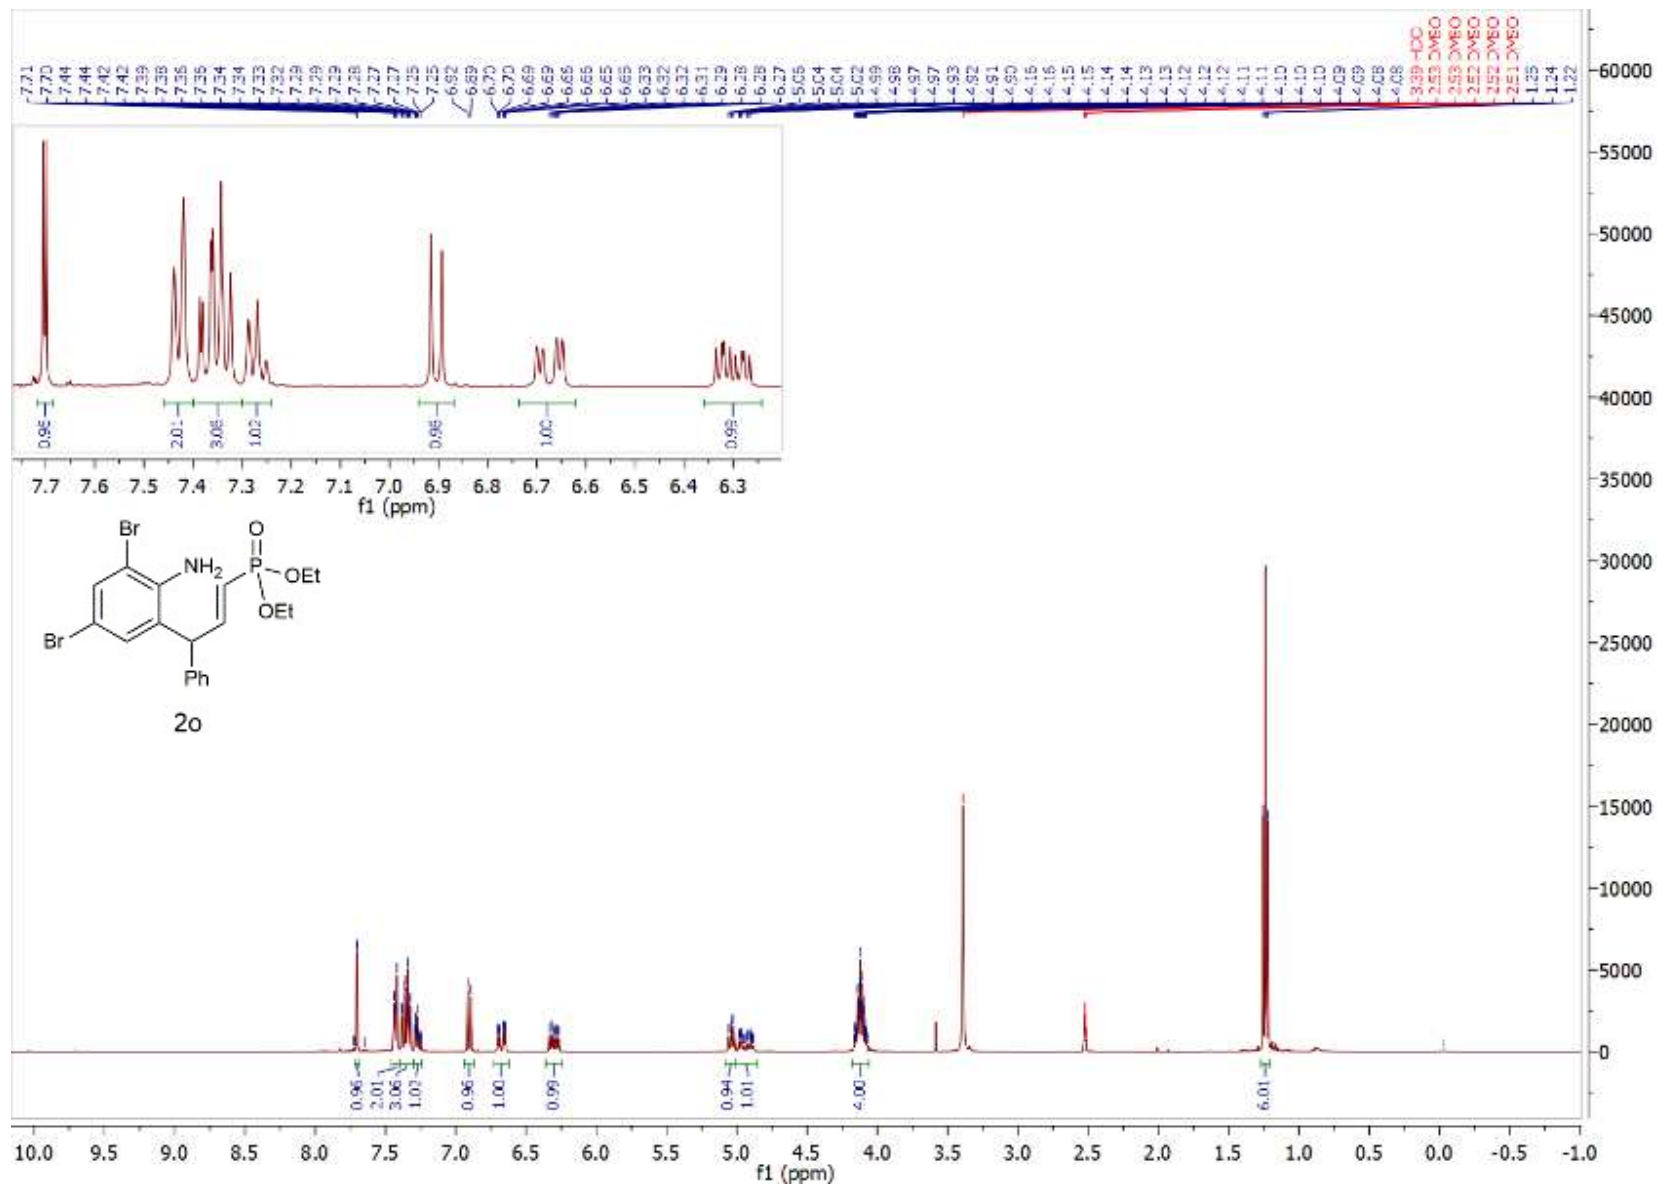

Figure S130: <sup>1</sup>H NMR Spectra of **2o**

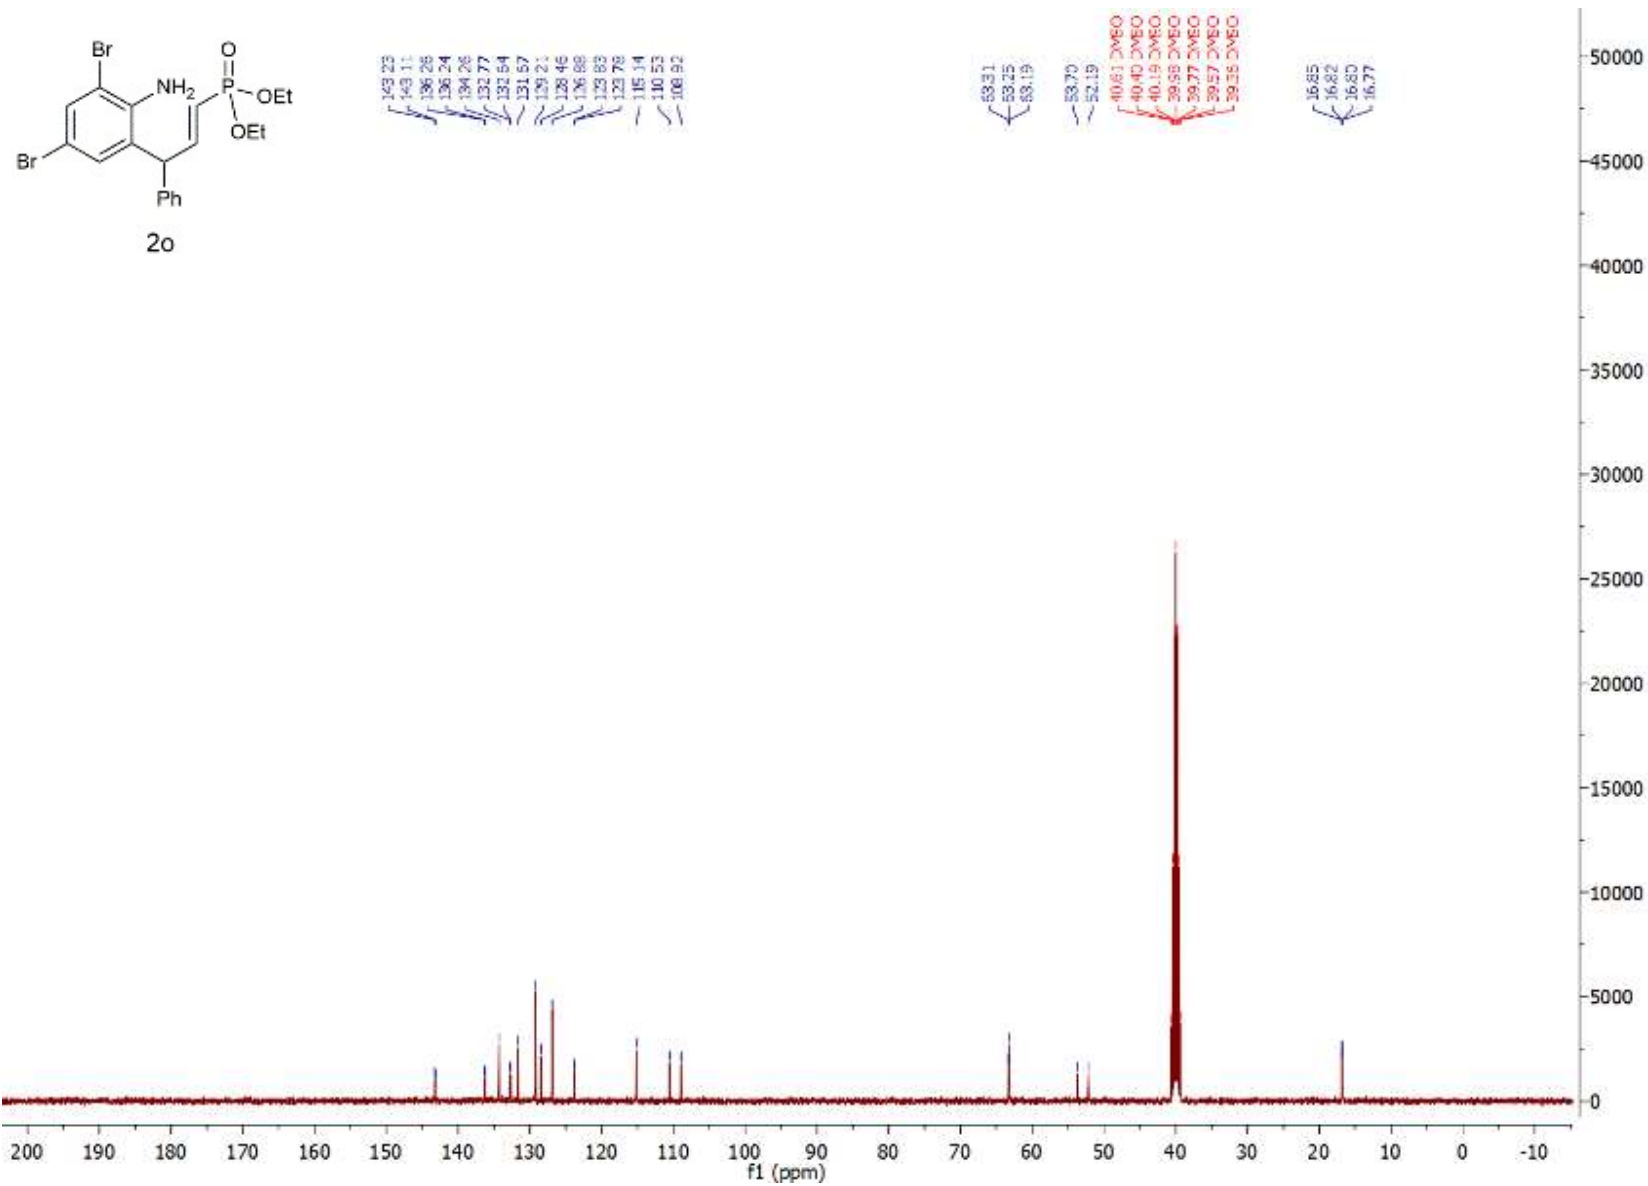

Figure S131:  $^{13}\text{C}$  NMR Spectra of 2o

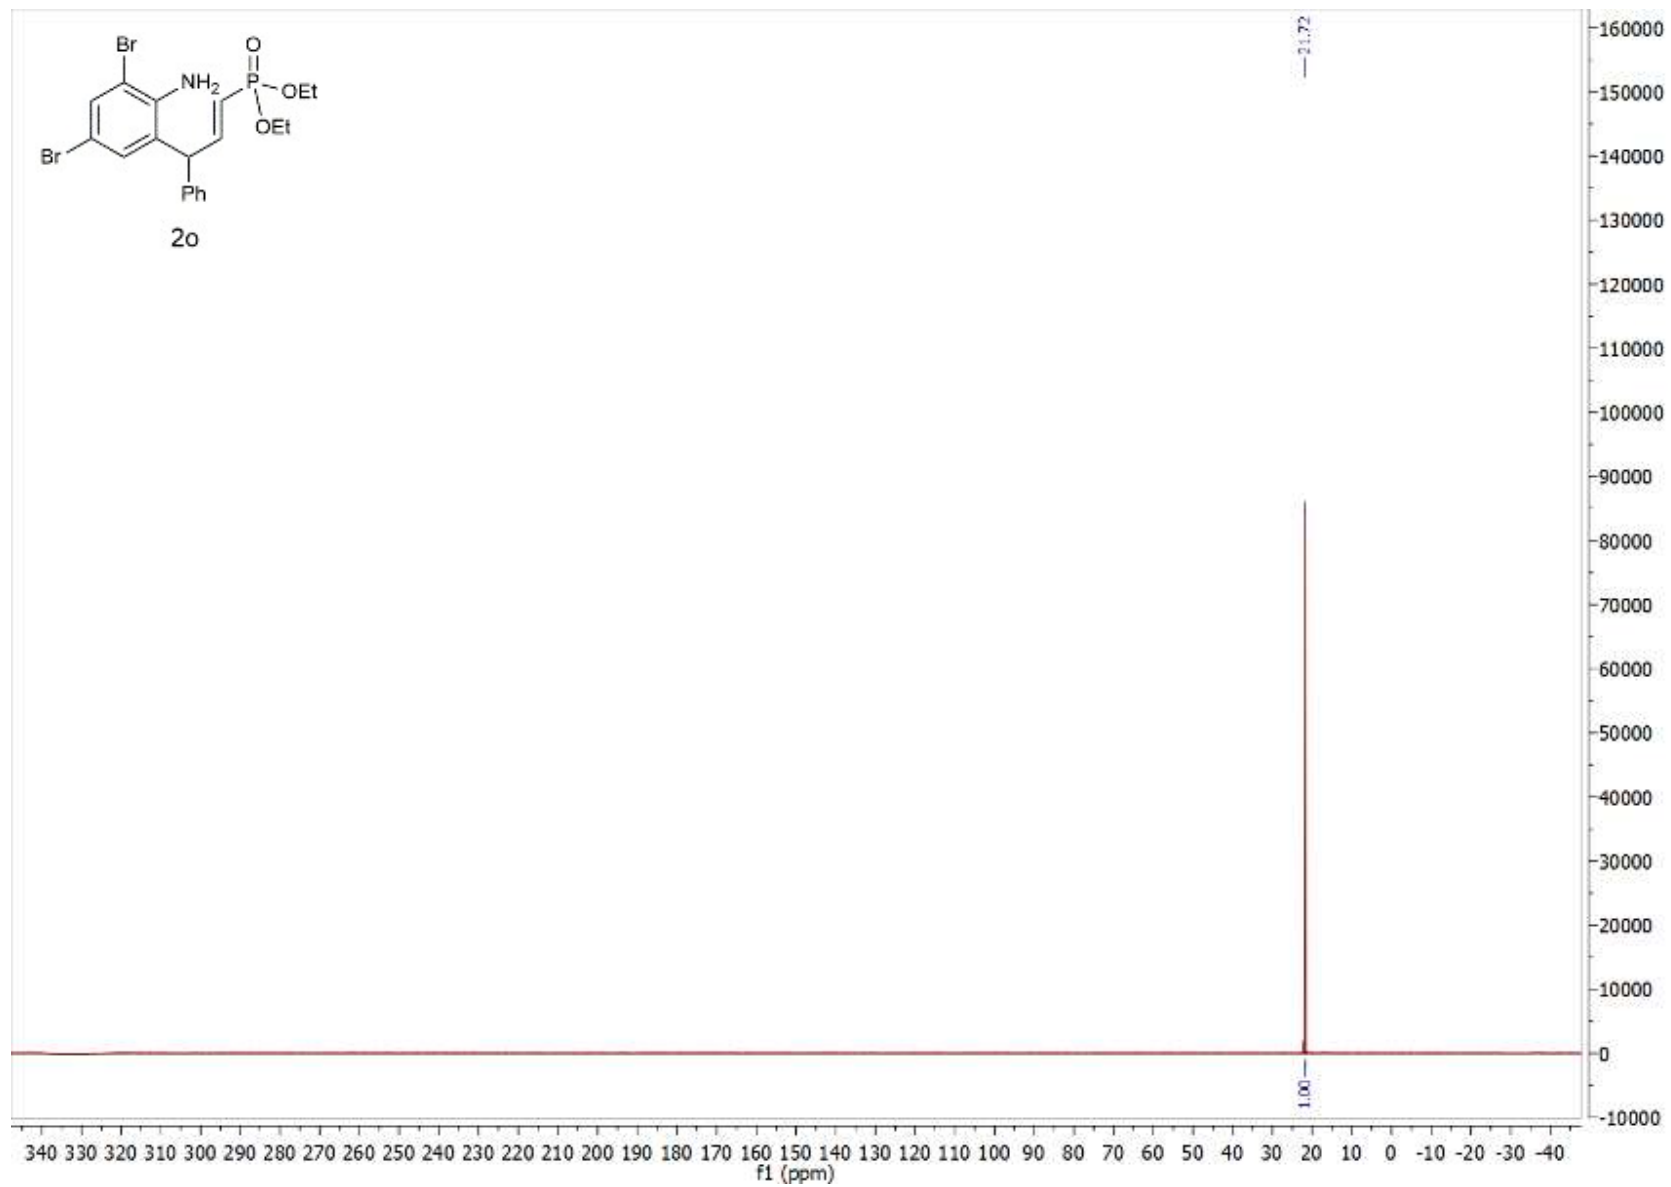

Figure S132:  $^{31}\text{P}$  NMR Spectra of 2o

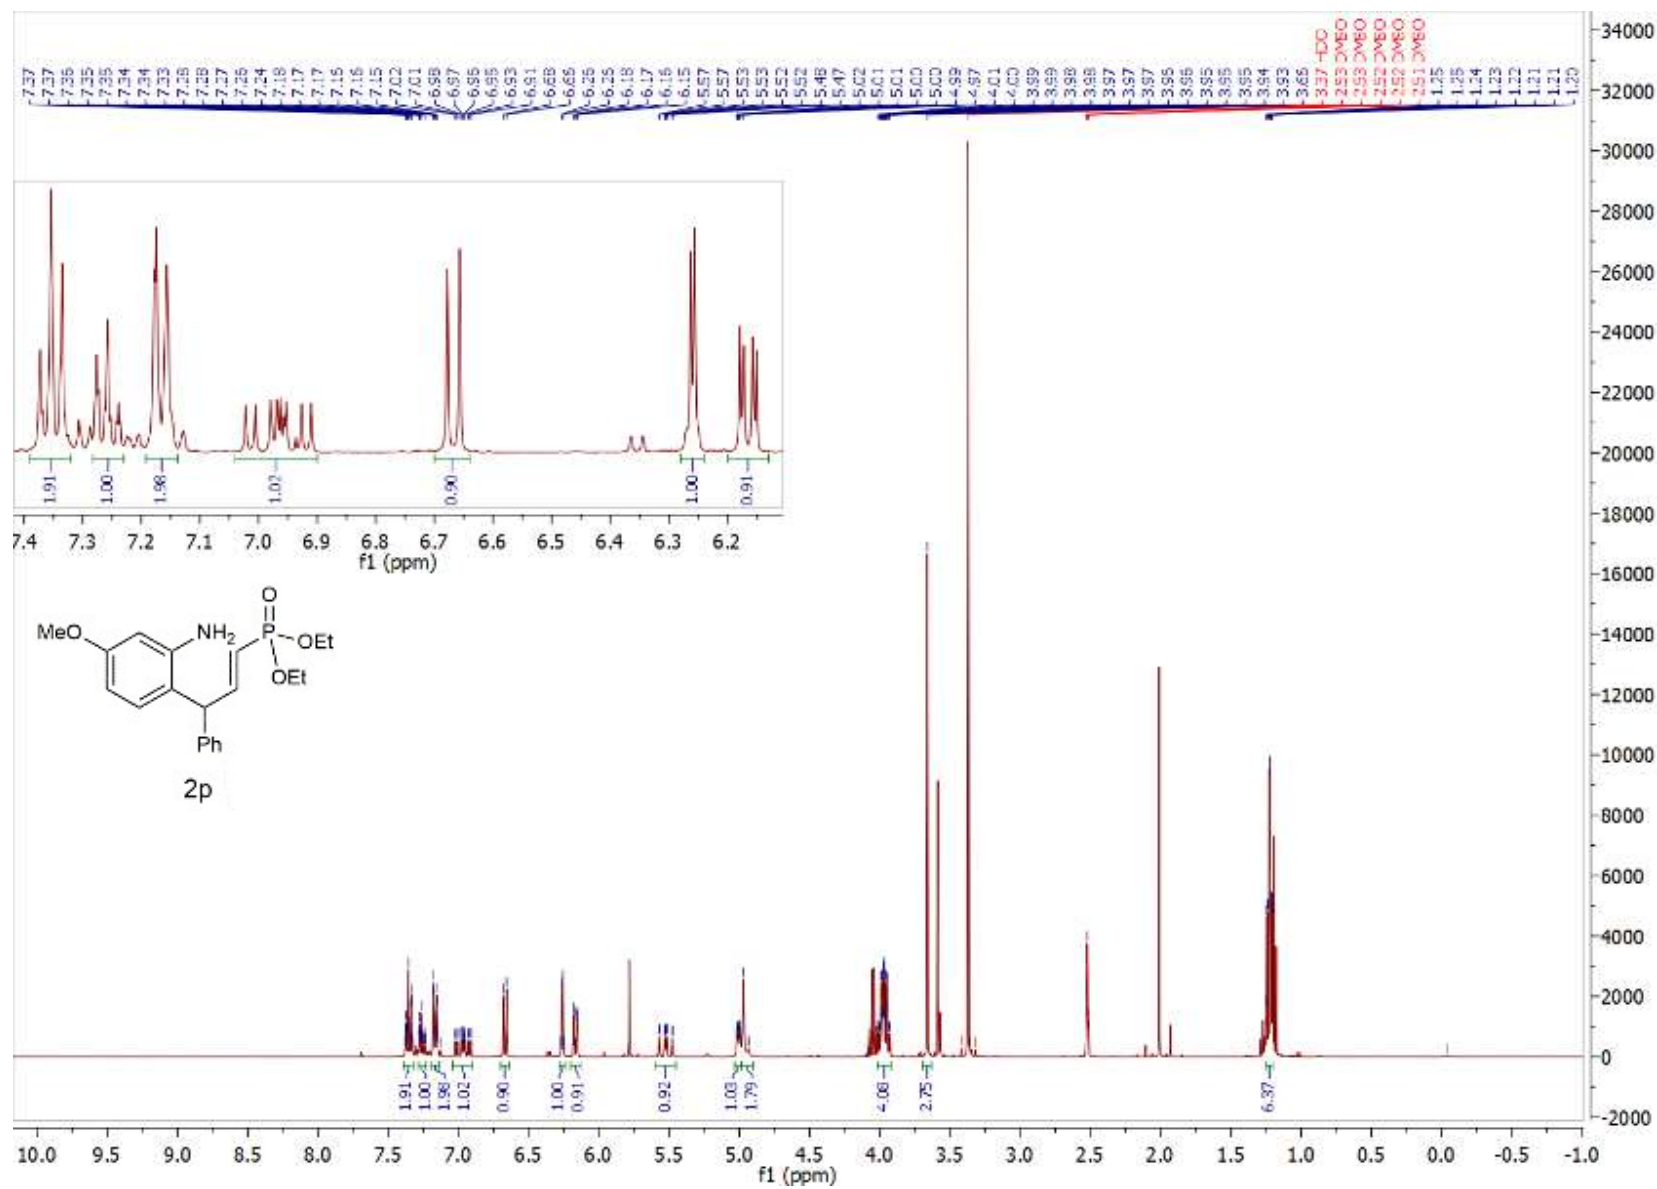

Figure S133: <sup>1</sup>H NMR Spectra of 2p

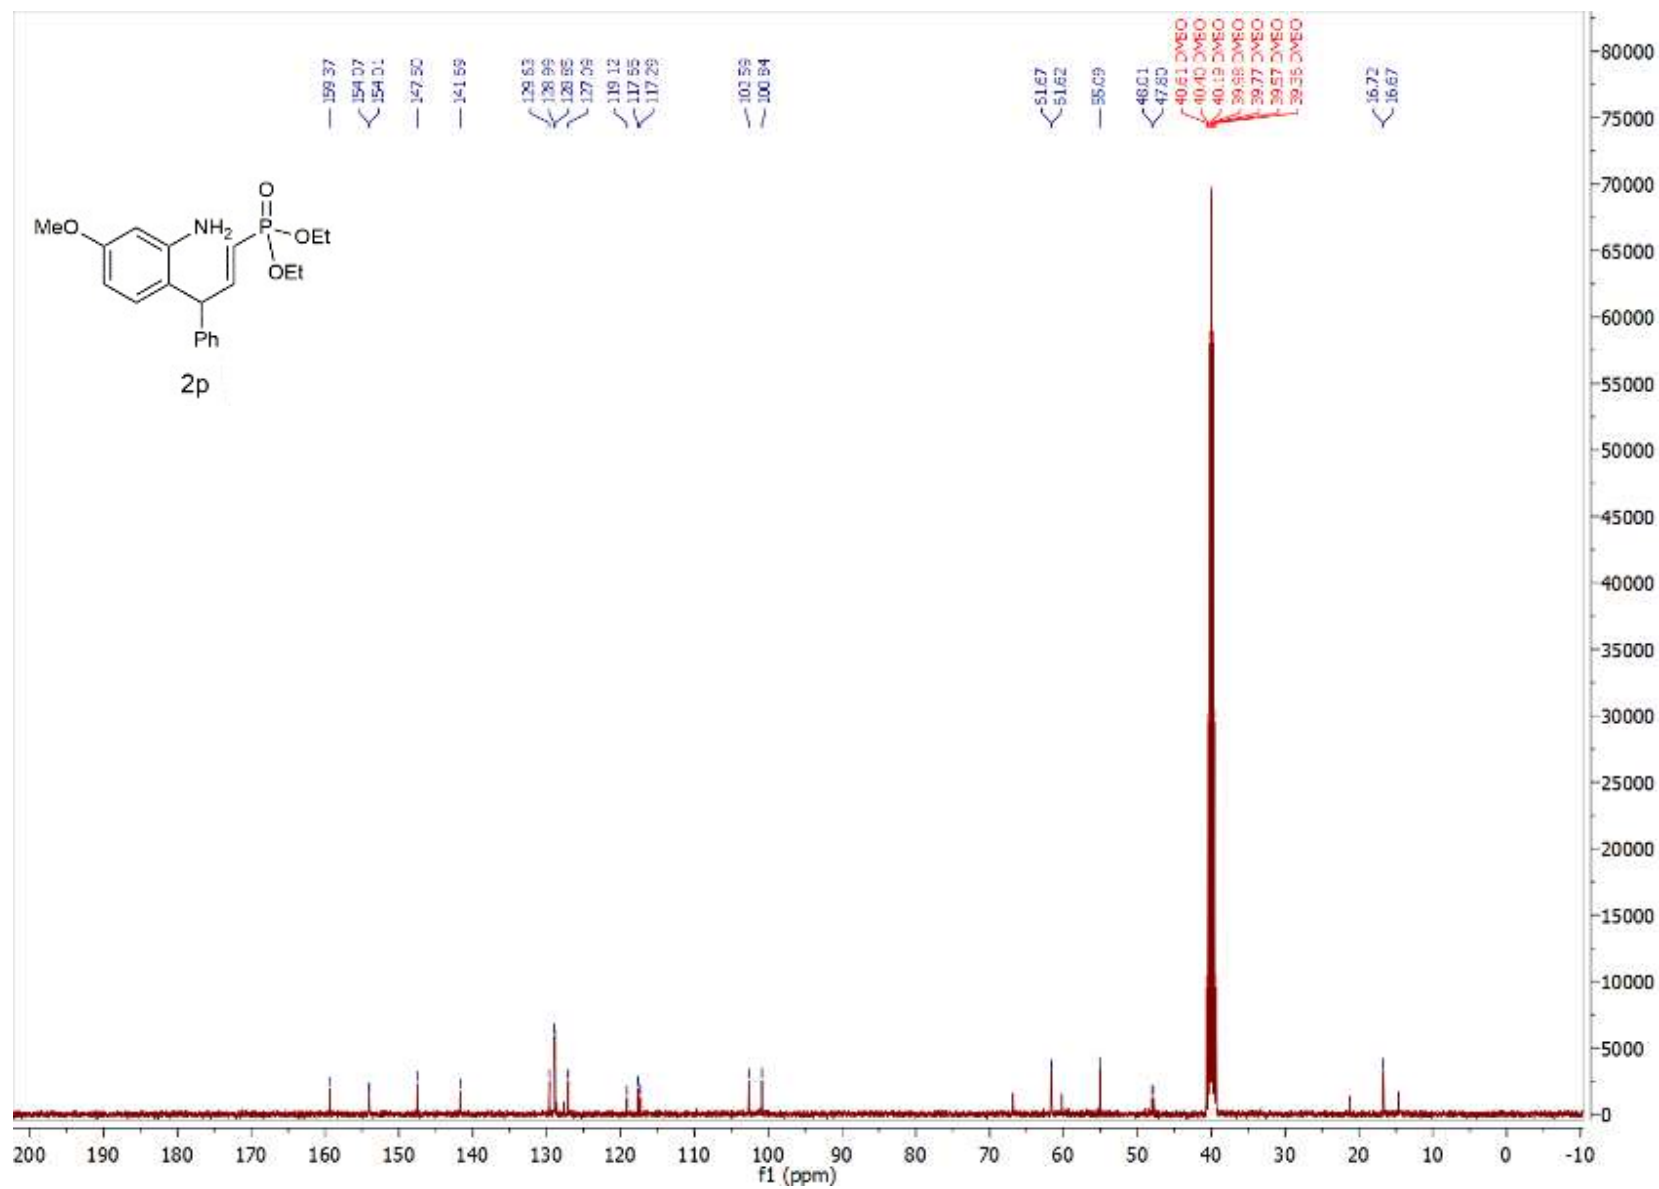

Figure S134: <sup>13</sup>C NMR Spectra of 2p

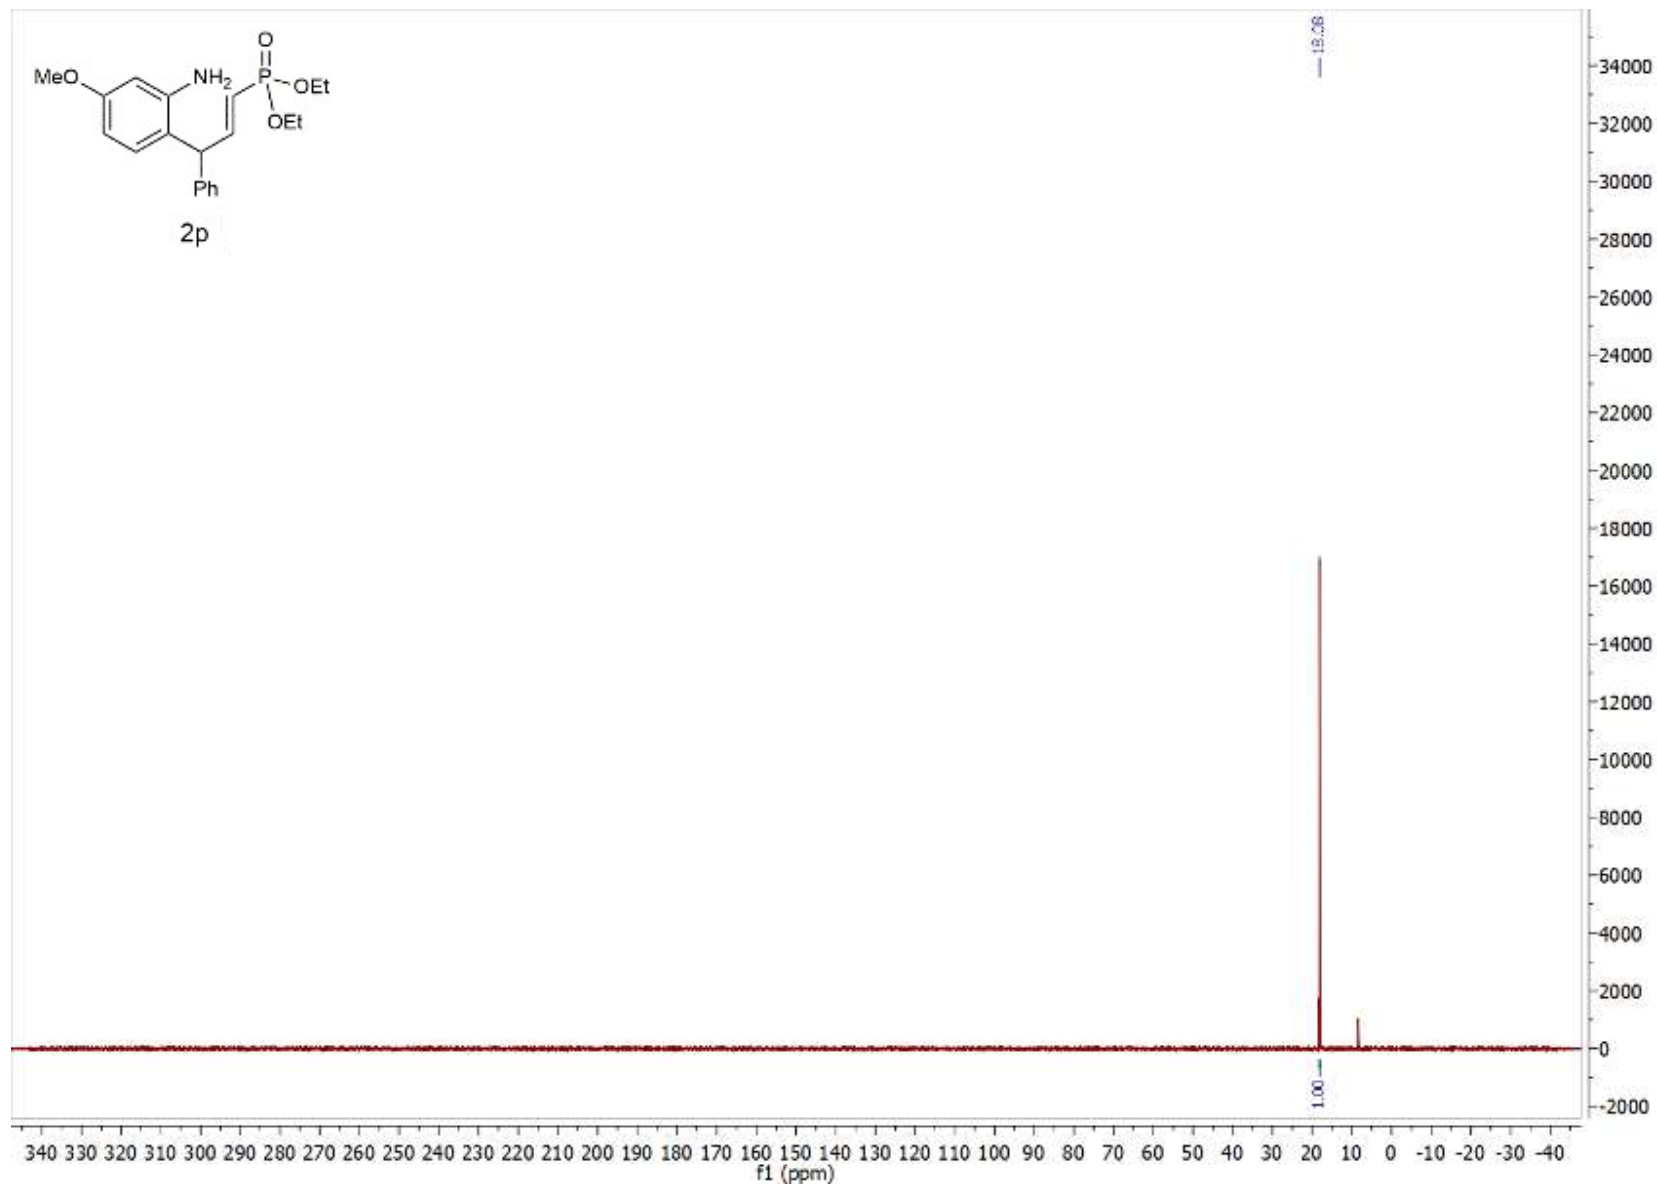

Figure S135:  $^{31}\text{P}$  NMR Spectra of 2p



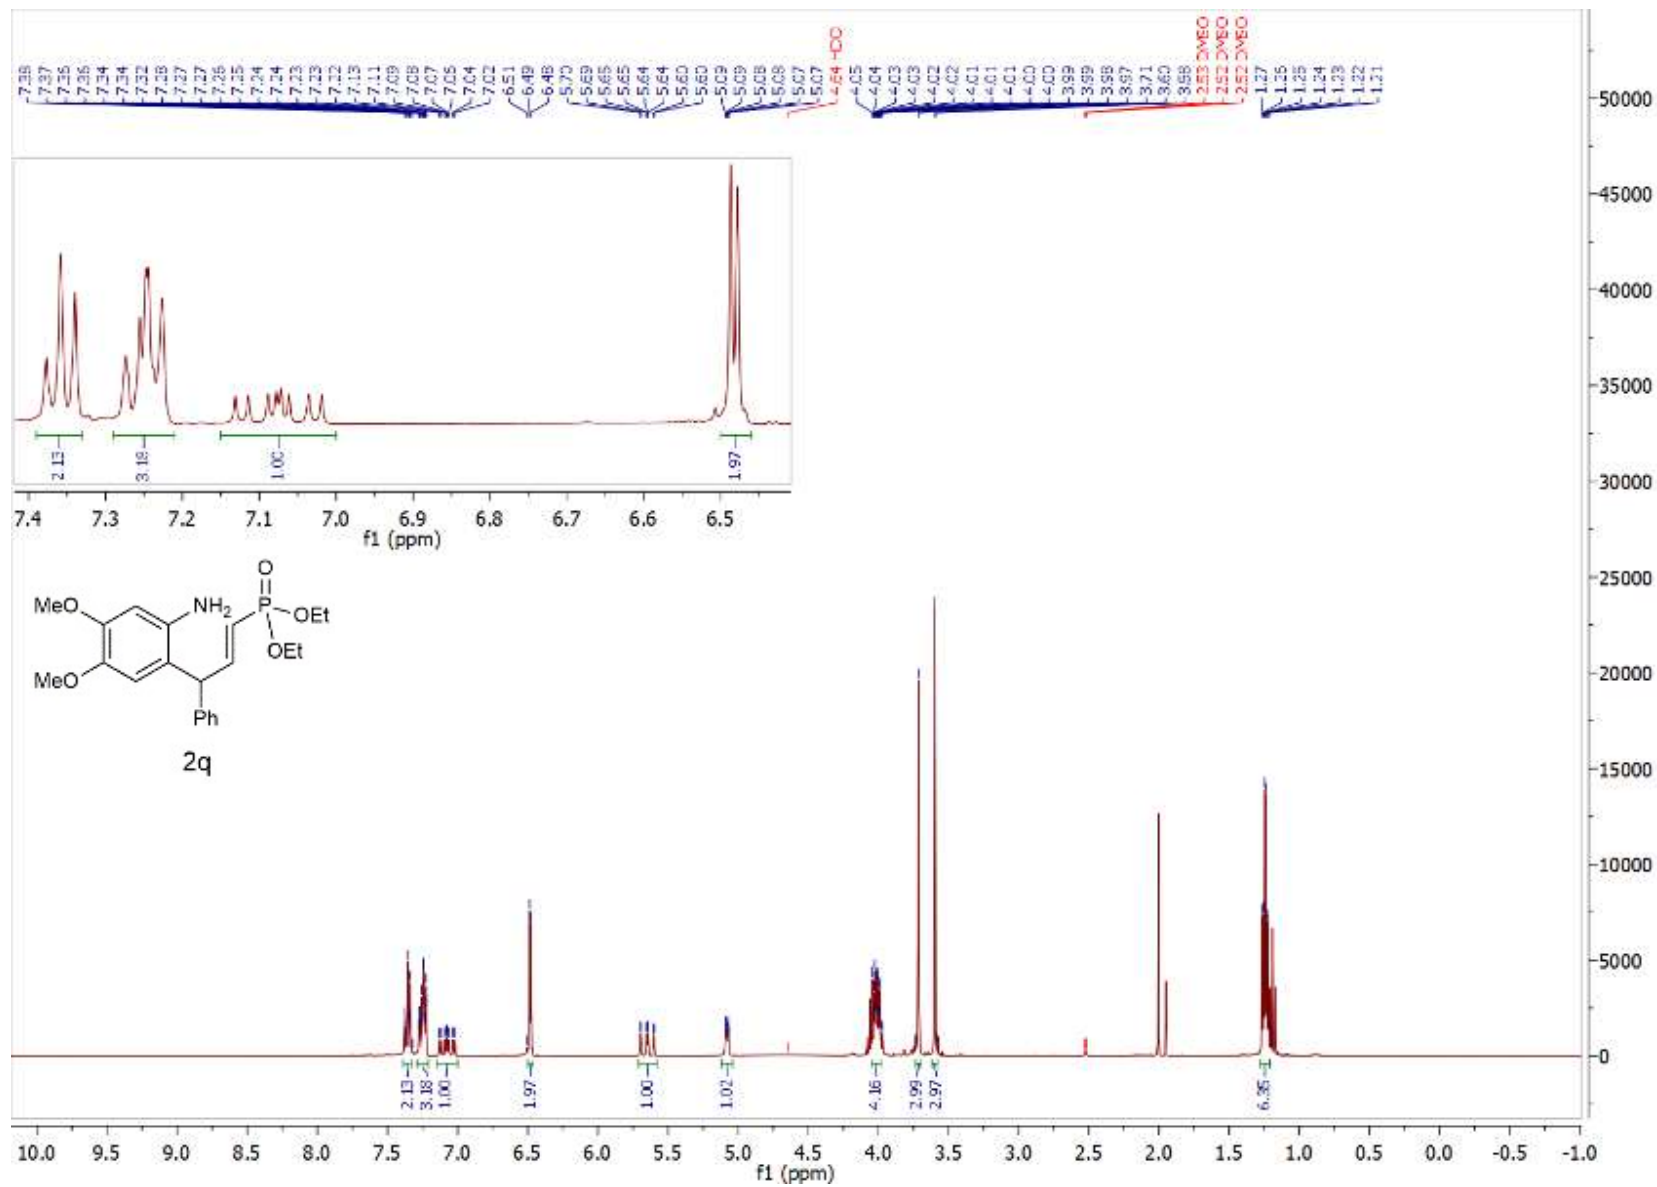

Figure S136: <sup>1</sup>H NMR Spectra of 2q

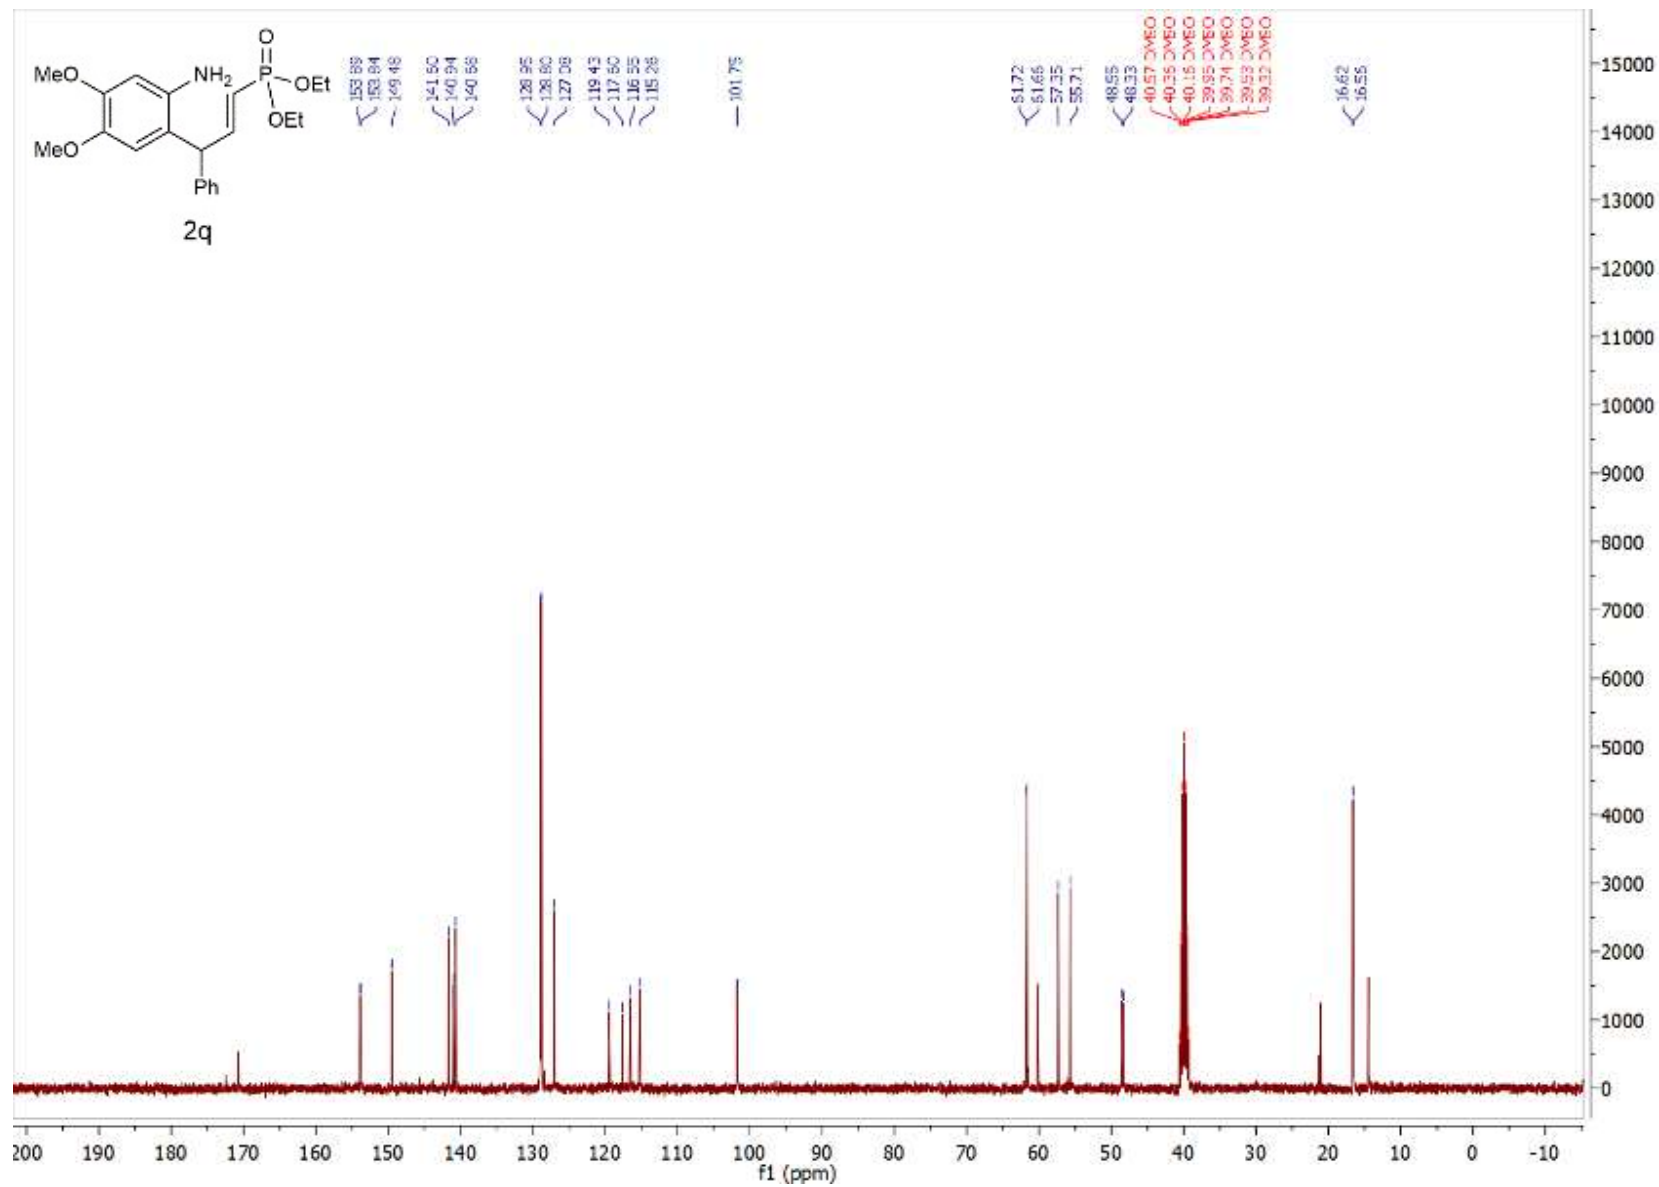

Figure S137:  $^{13}\text{C}$  NMR Spectra of 2q

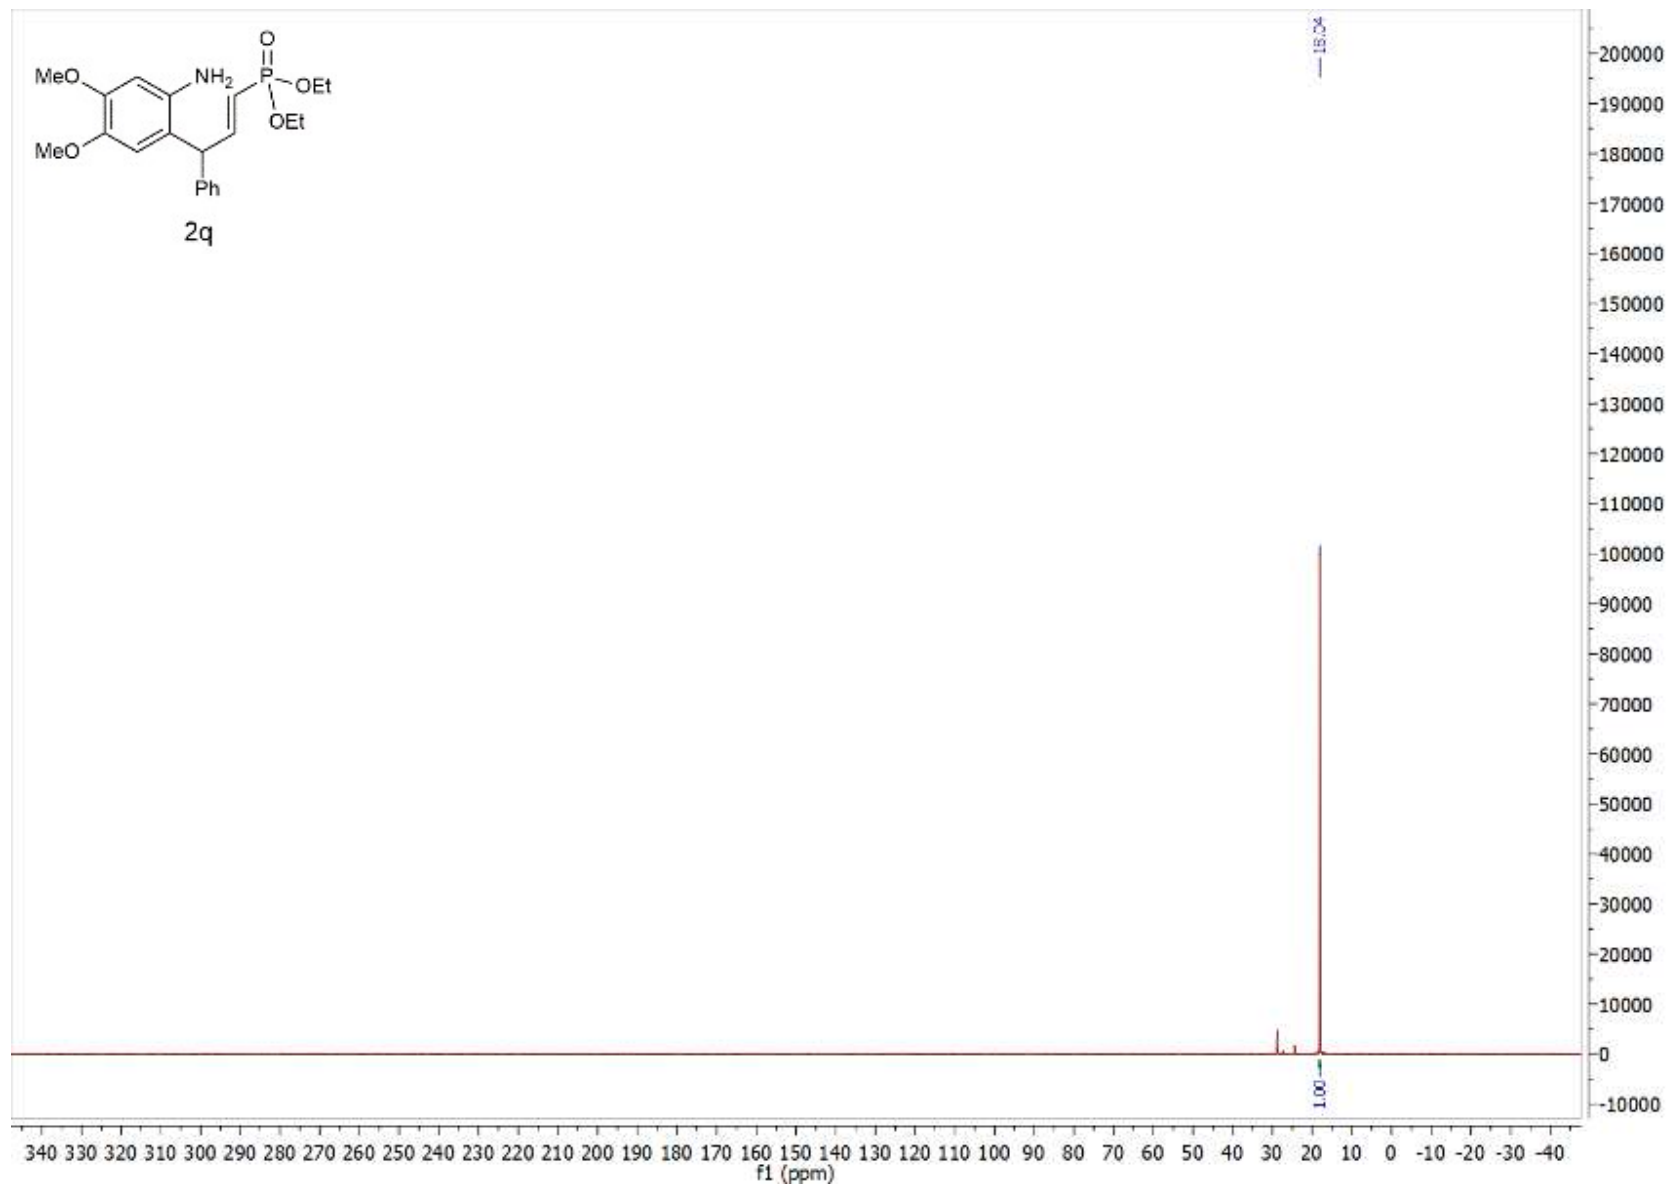

Figure S138:  $^{31}\text{P}$  NMR Spectra of 2q

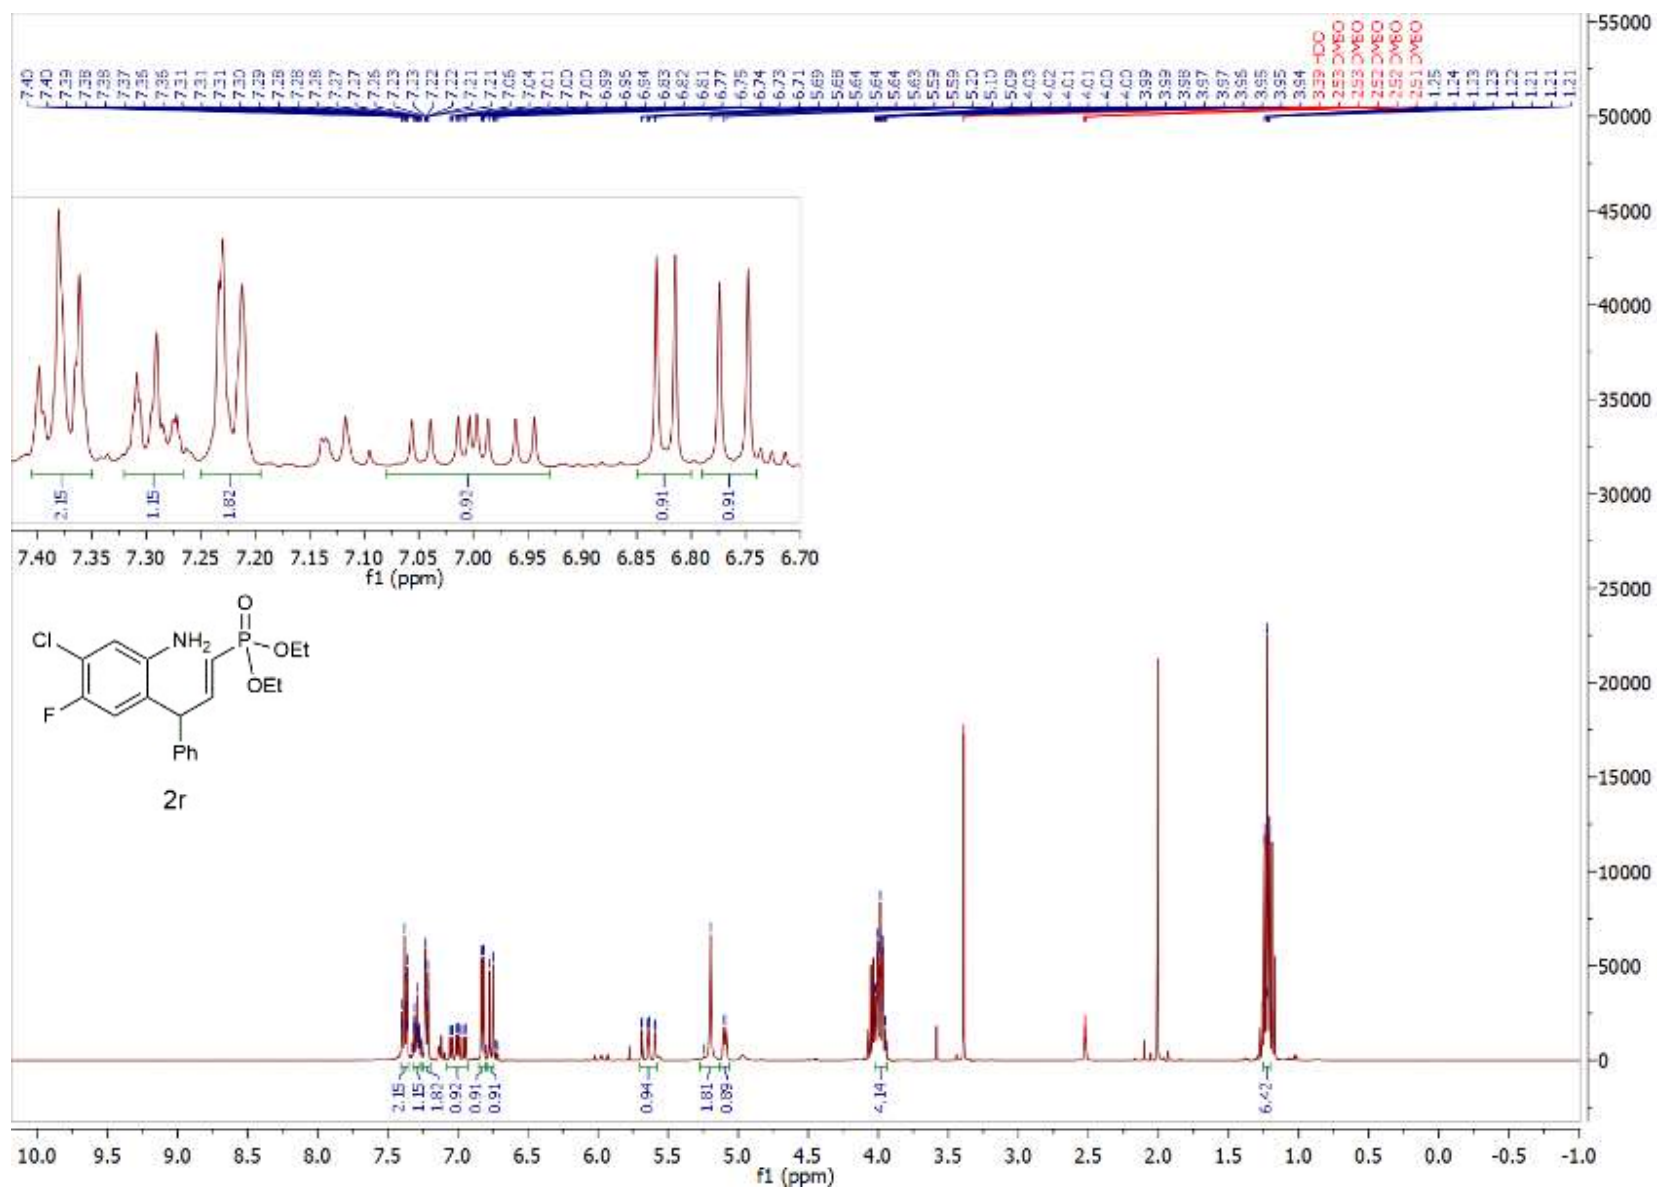

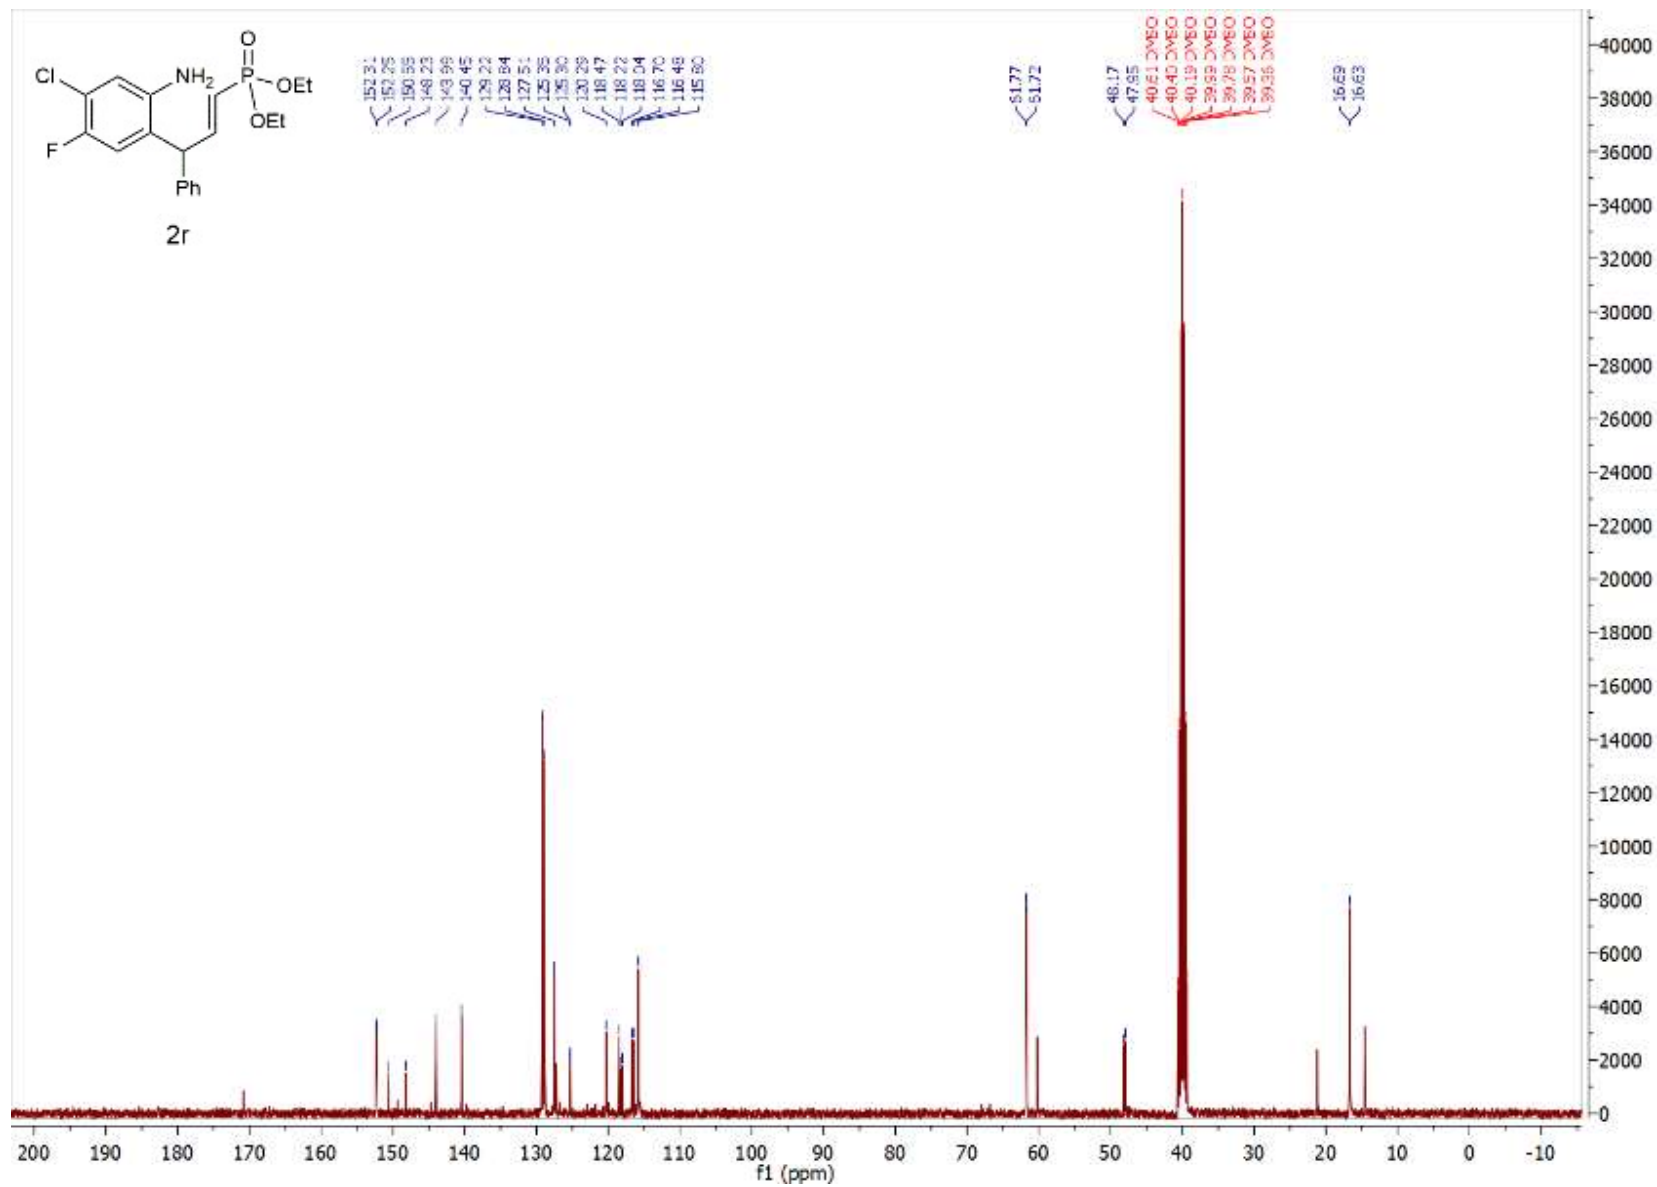

Figure S140: <sup>13</sup>C NMR Spectra of 2r

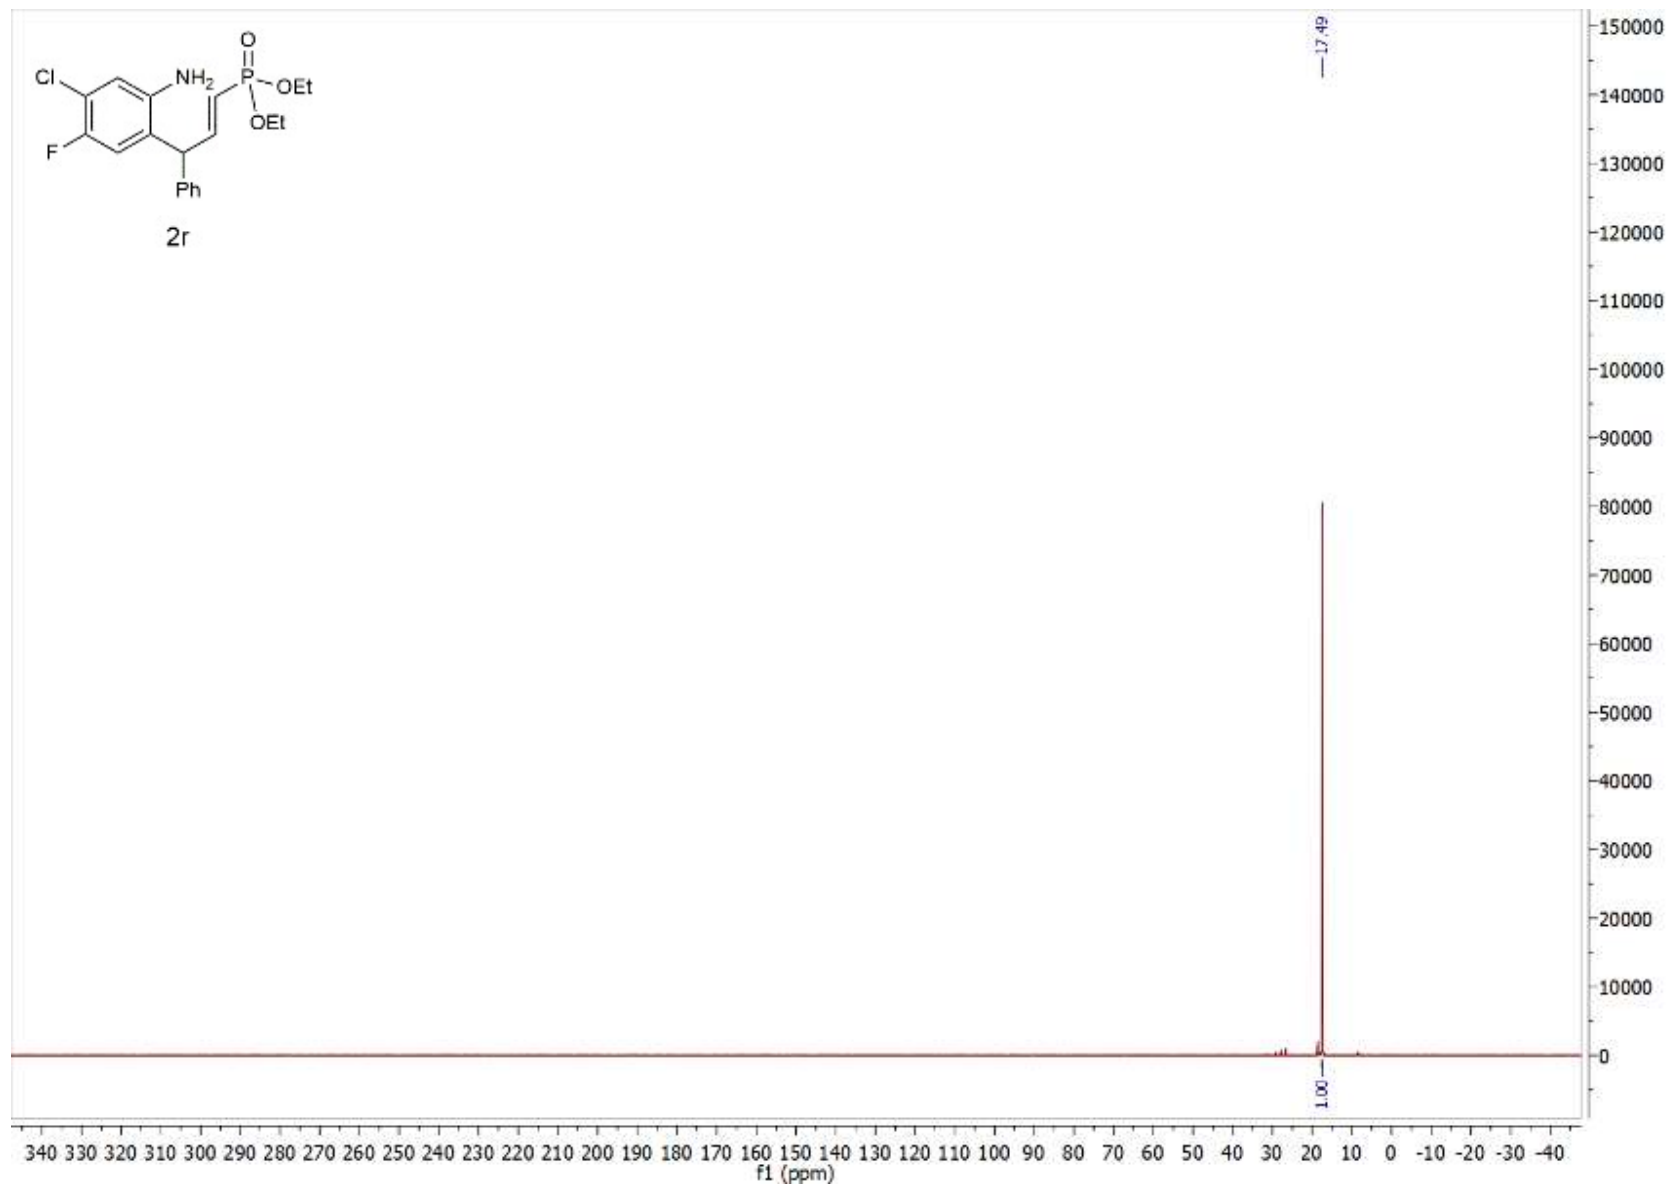

Figure S141:  $^{31}\text{P}$  NMR Spectra of 2r

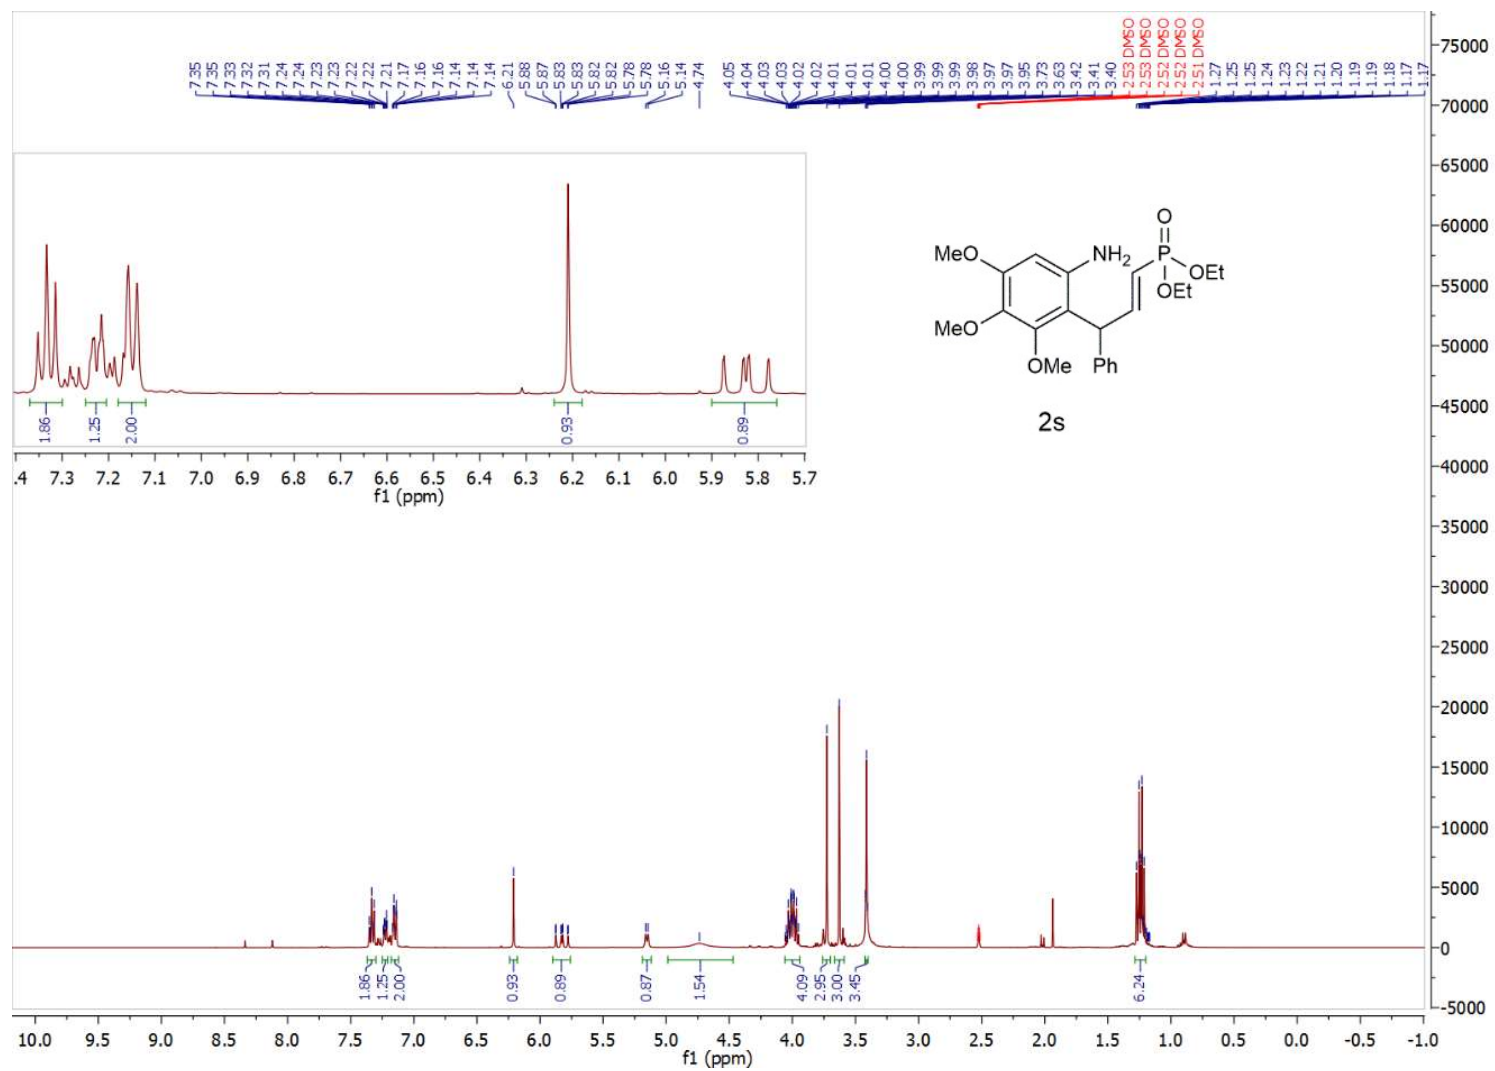

Figure S142: <sup>1</sup>H NMR Spectra of **2s**

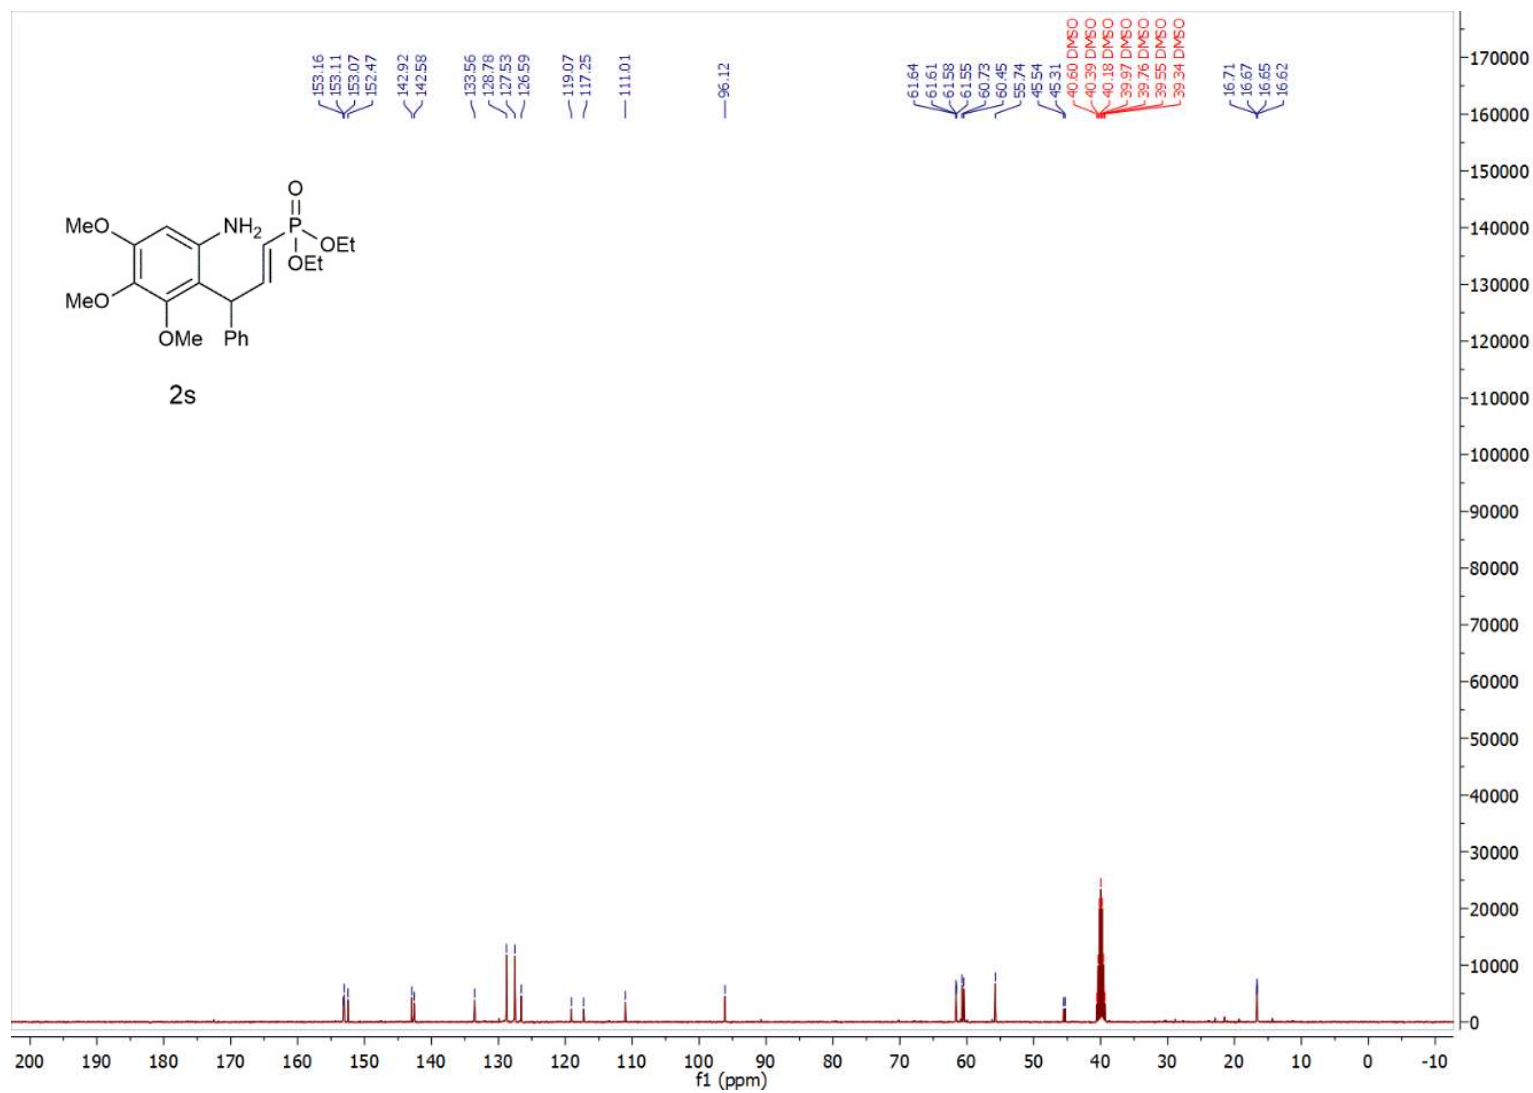

Figure S143:  $^{13}\text{C}$  NMR Spectra of **2s**



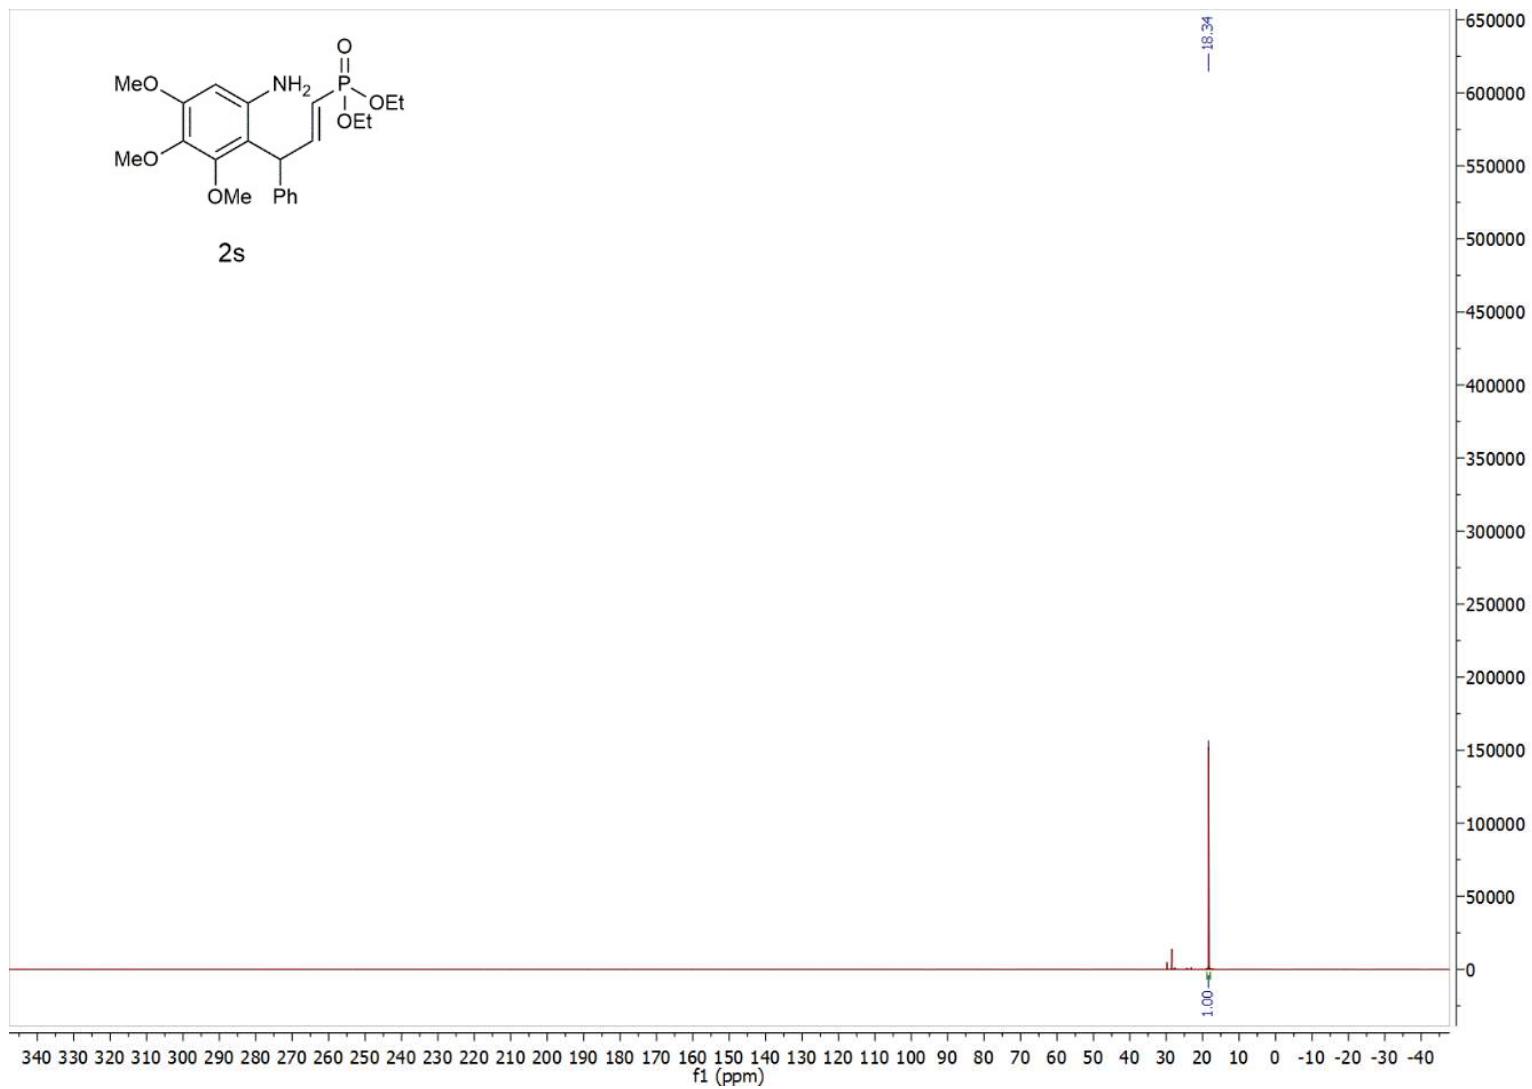

Figure S144:  $^{31}\text{P}$  NMR Spectra of **2s**

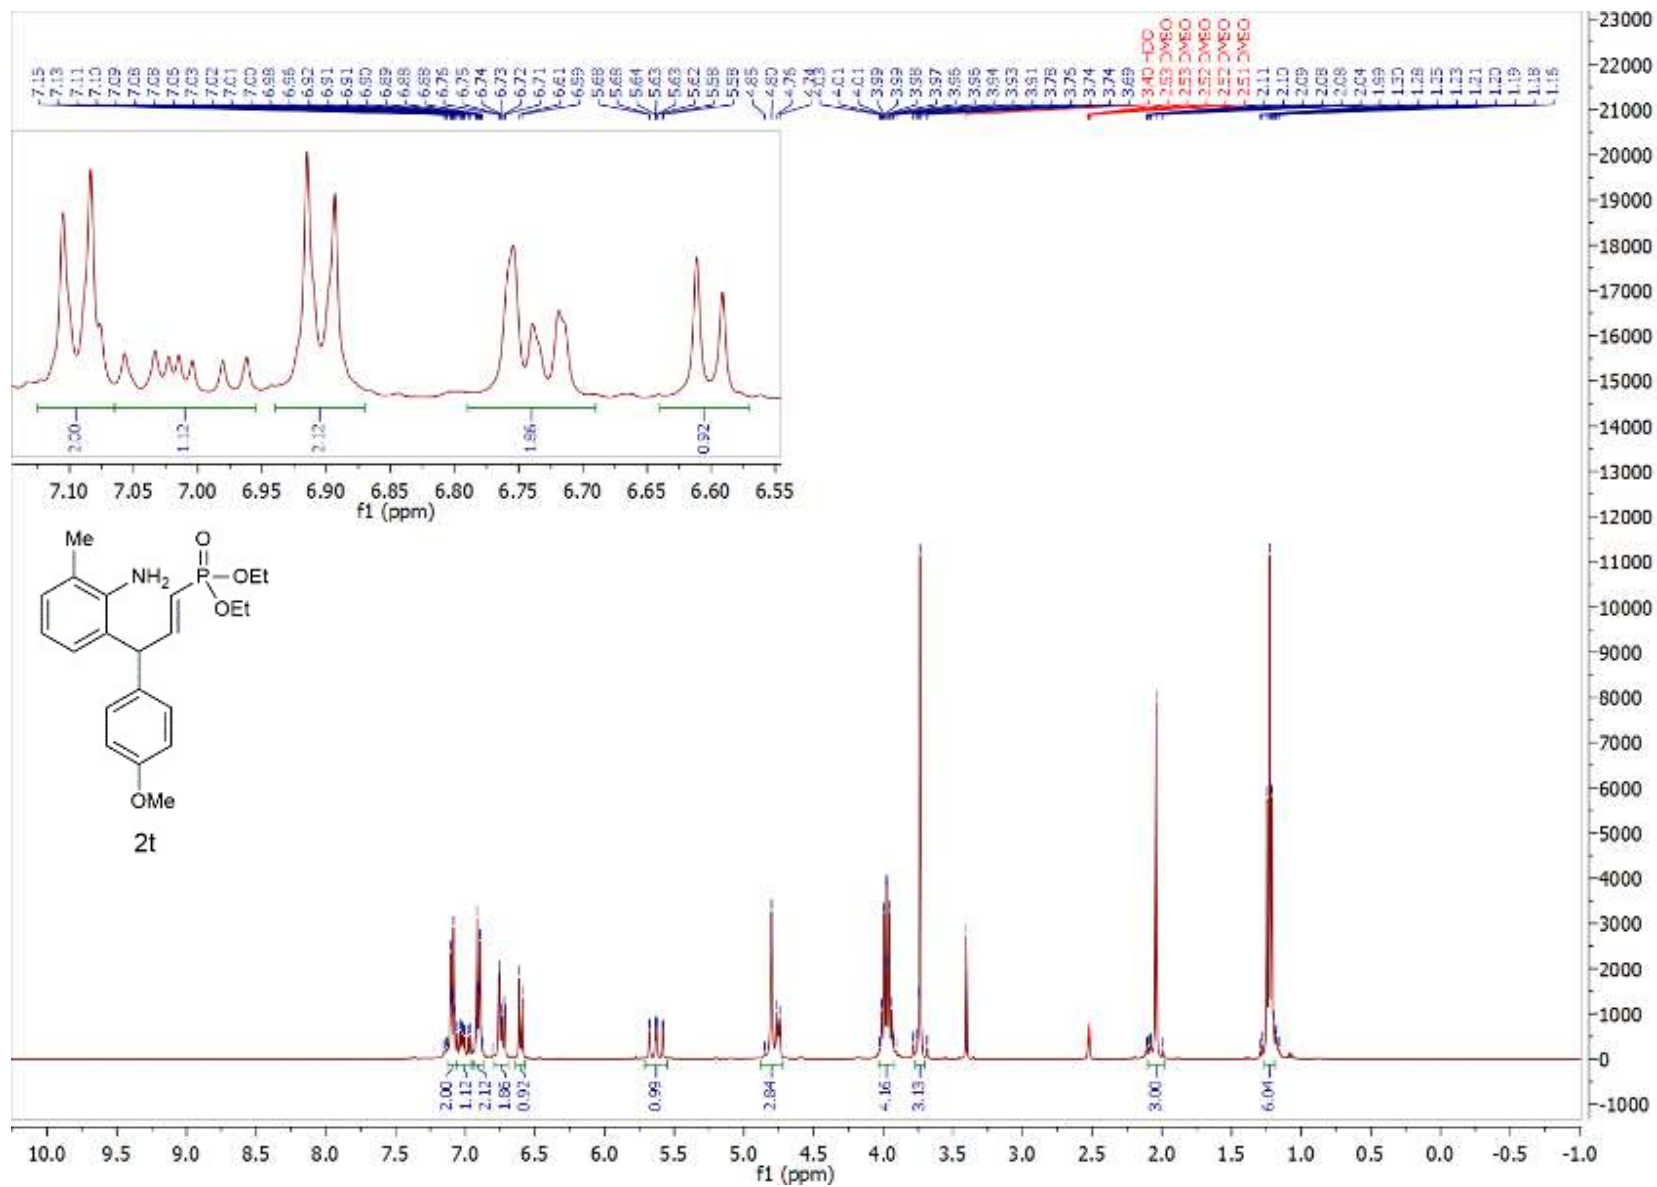

Figure S145: <sup>1</sup>H NMR Spectra of 2t

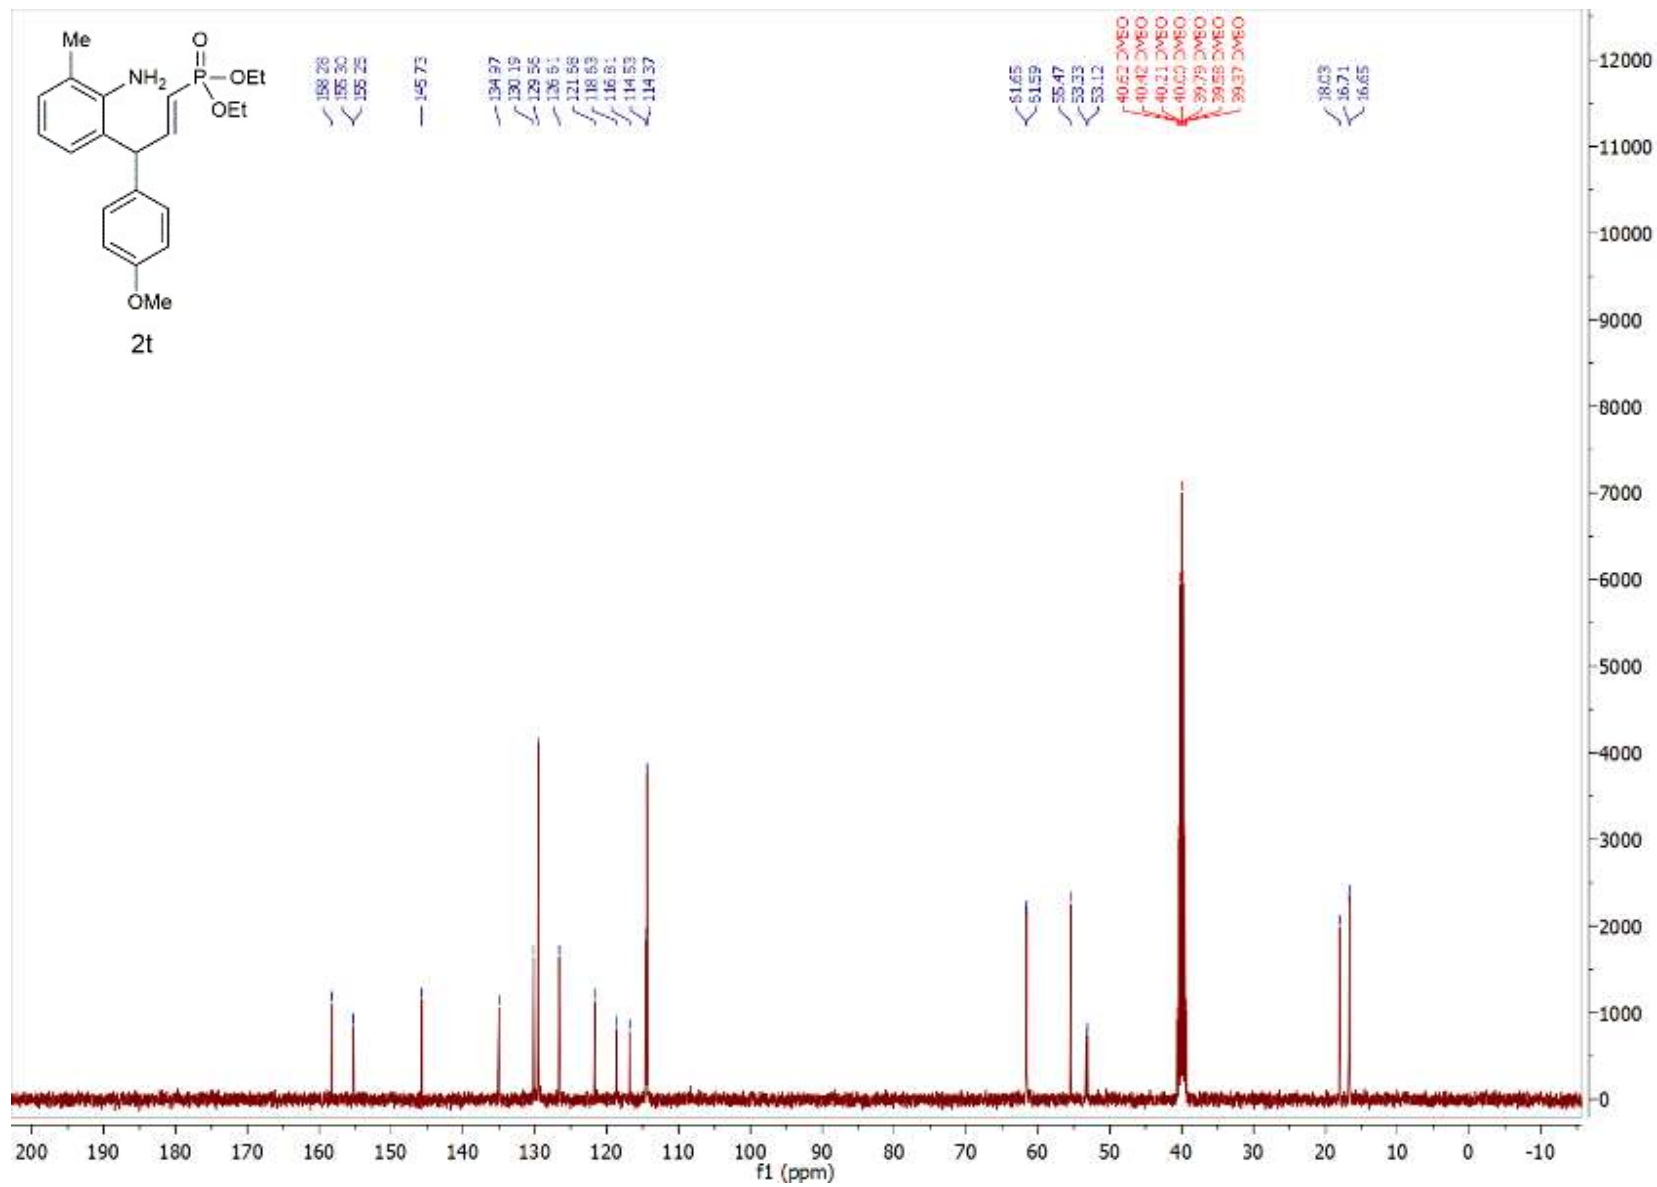

Figure S146:  $^{13}\text{C}$  NMR Spectra of 2t

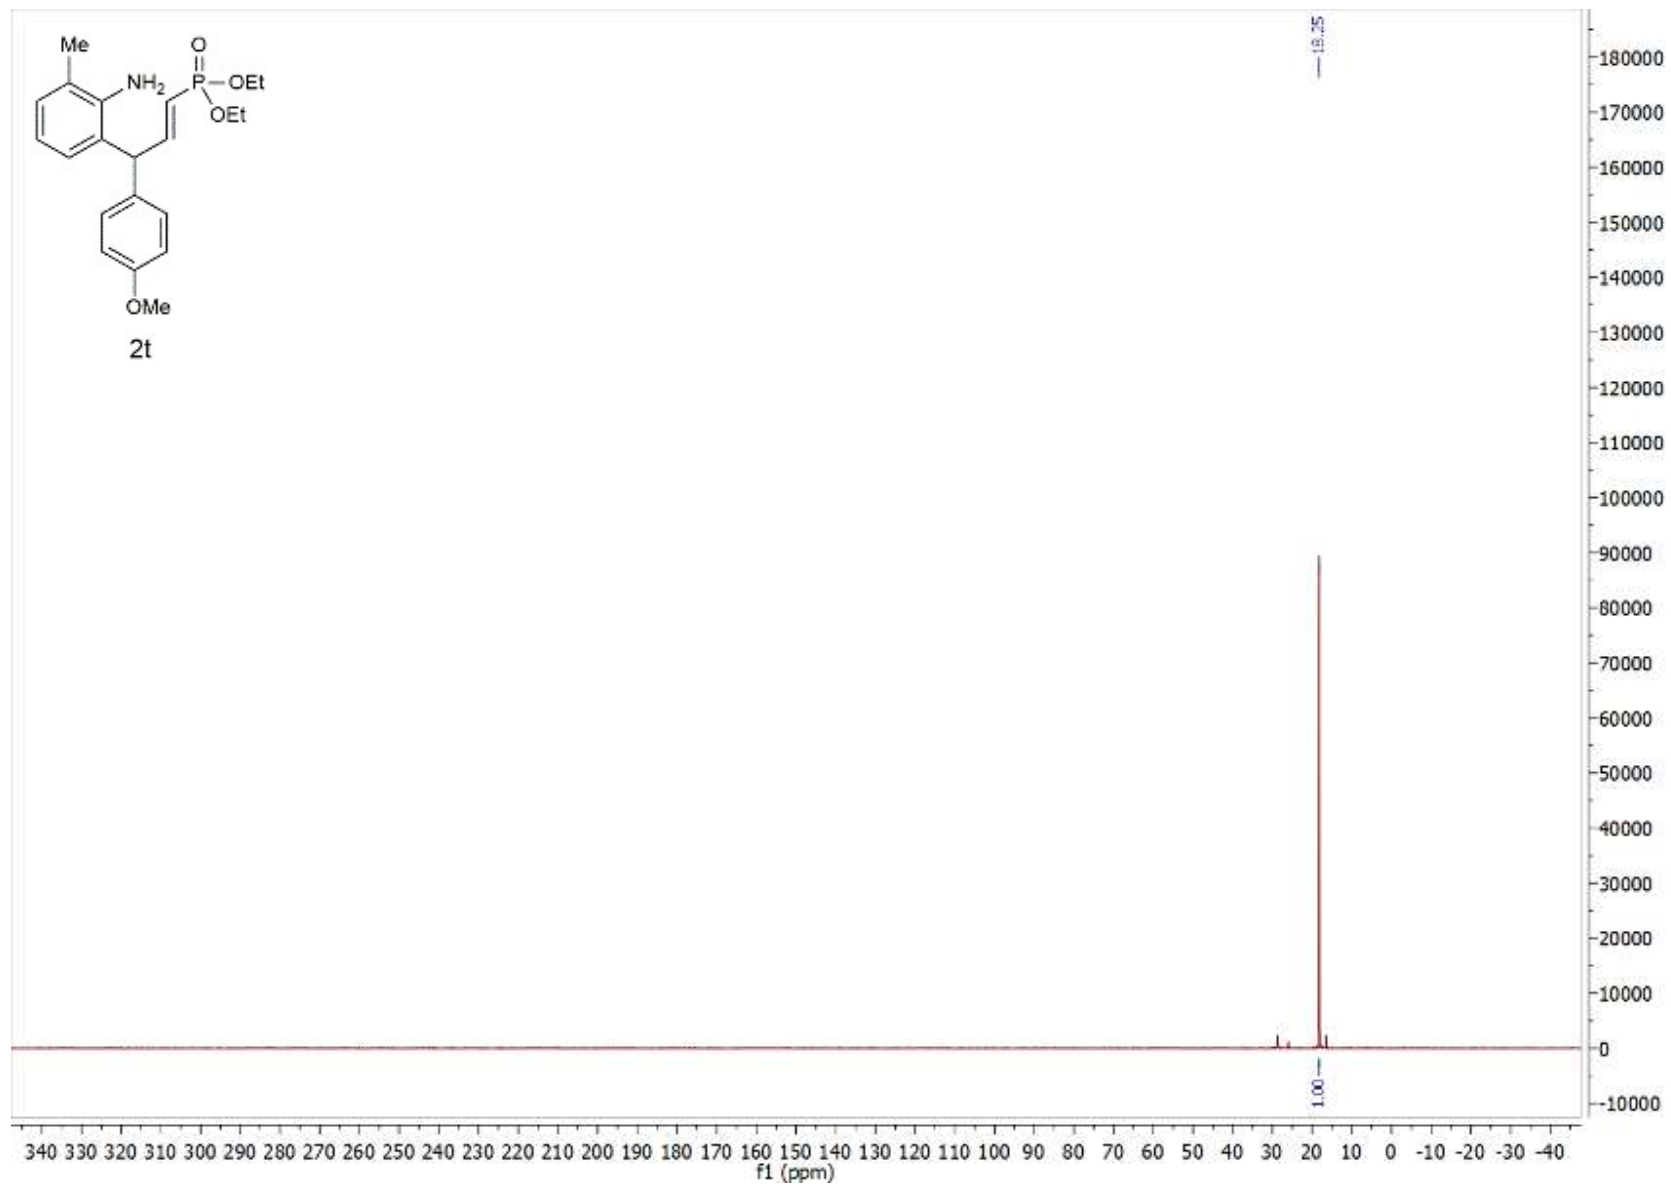

Figure S147: <sup>31</sup>P NMR Spectra of **2t**

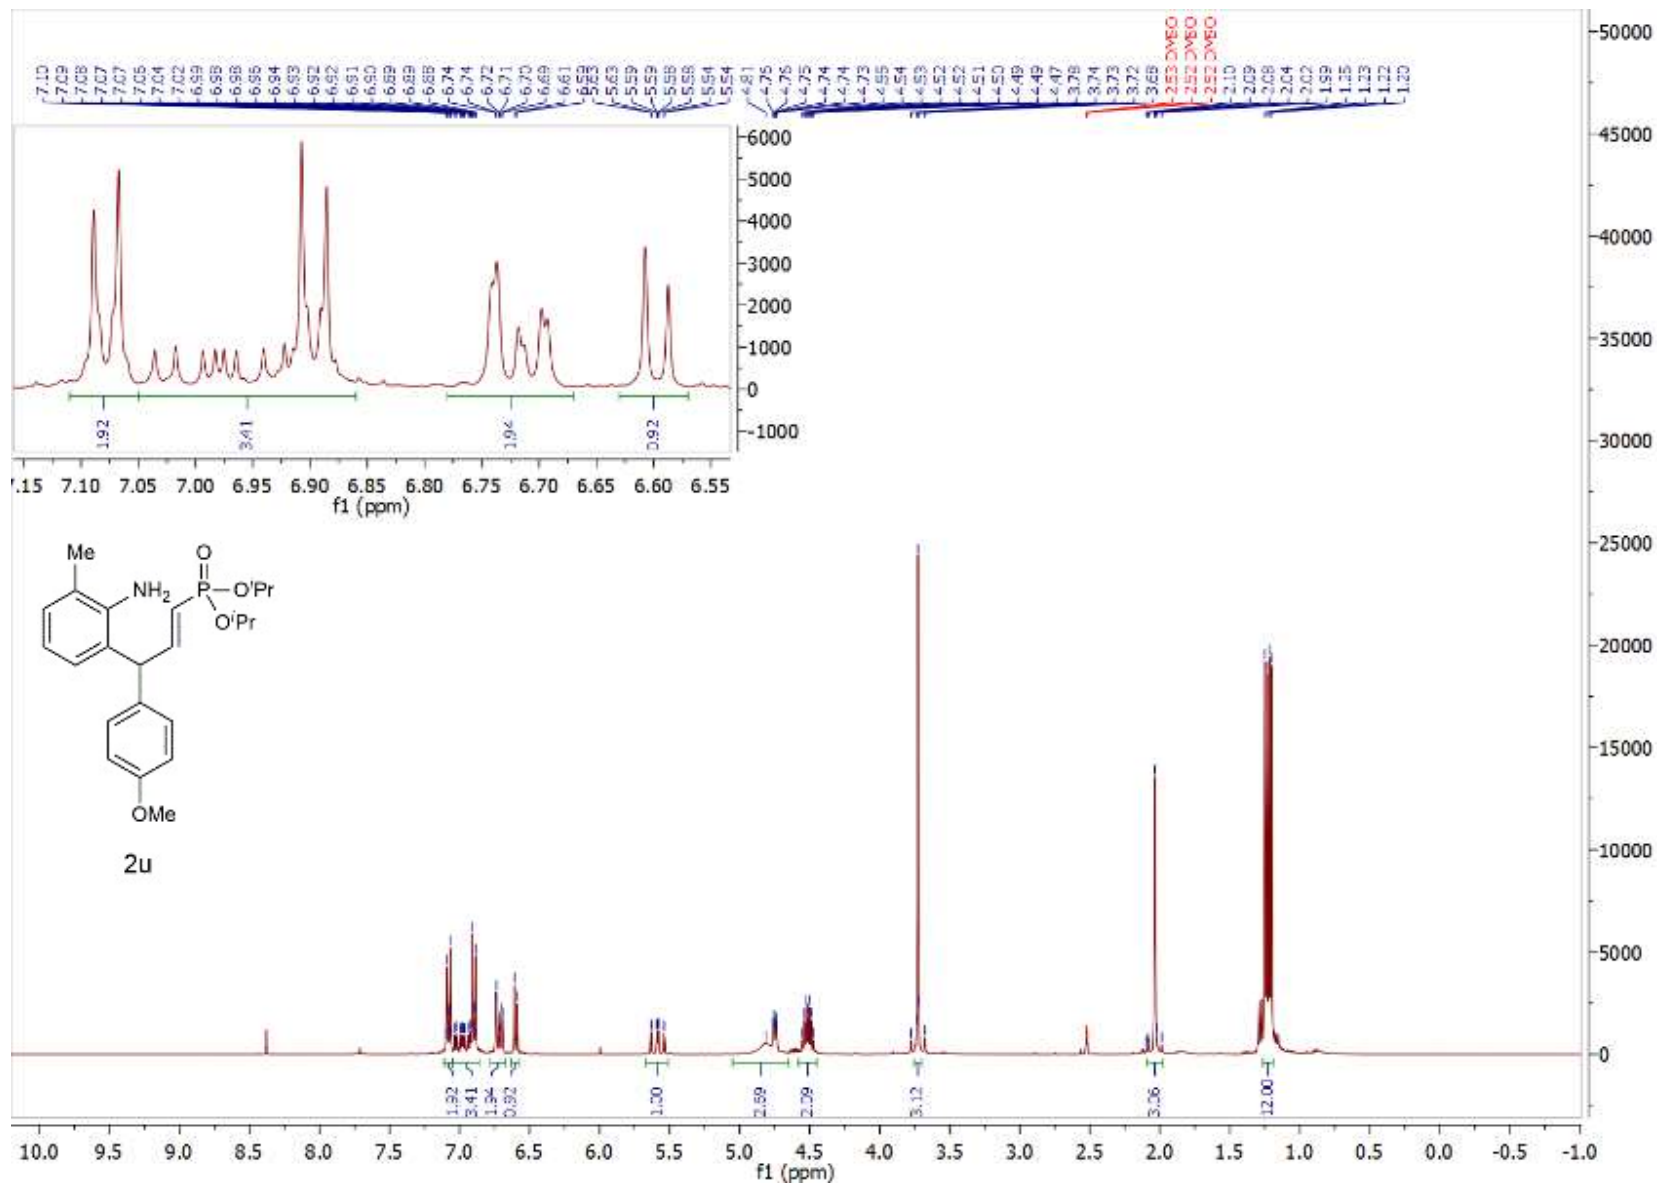

Figure S148: <sup>1</sup>H NMR Spectra of 2u

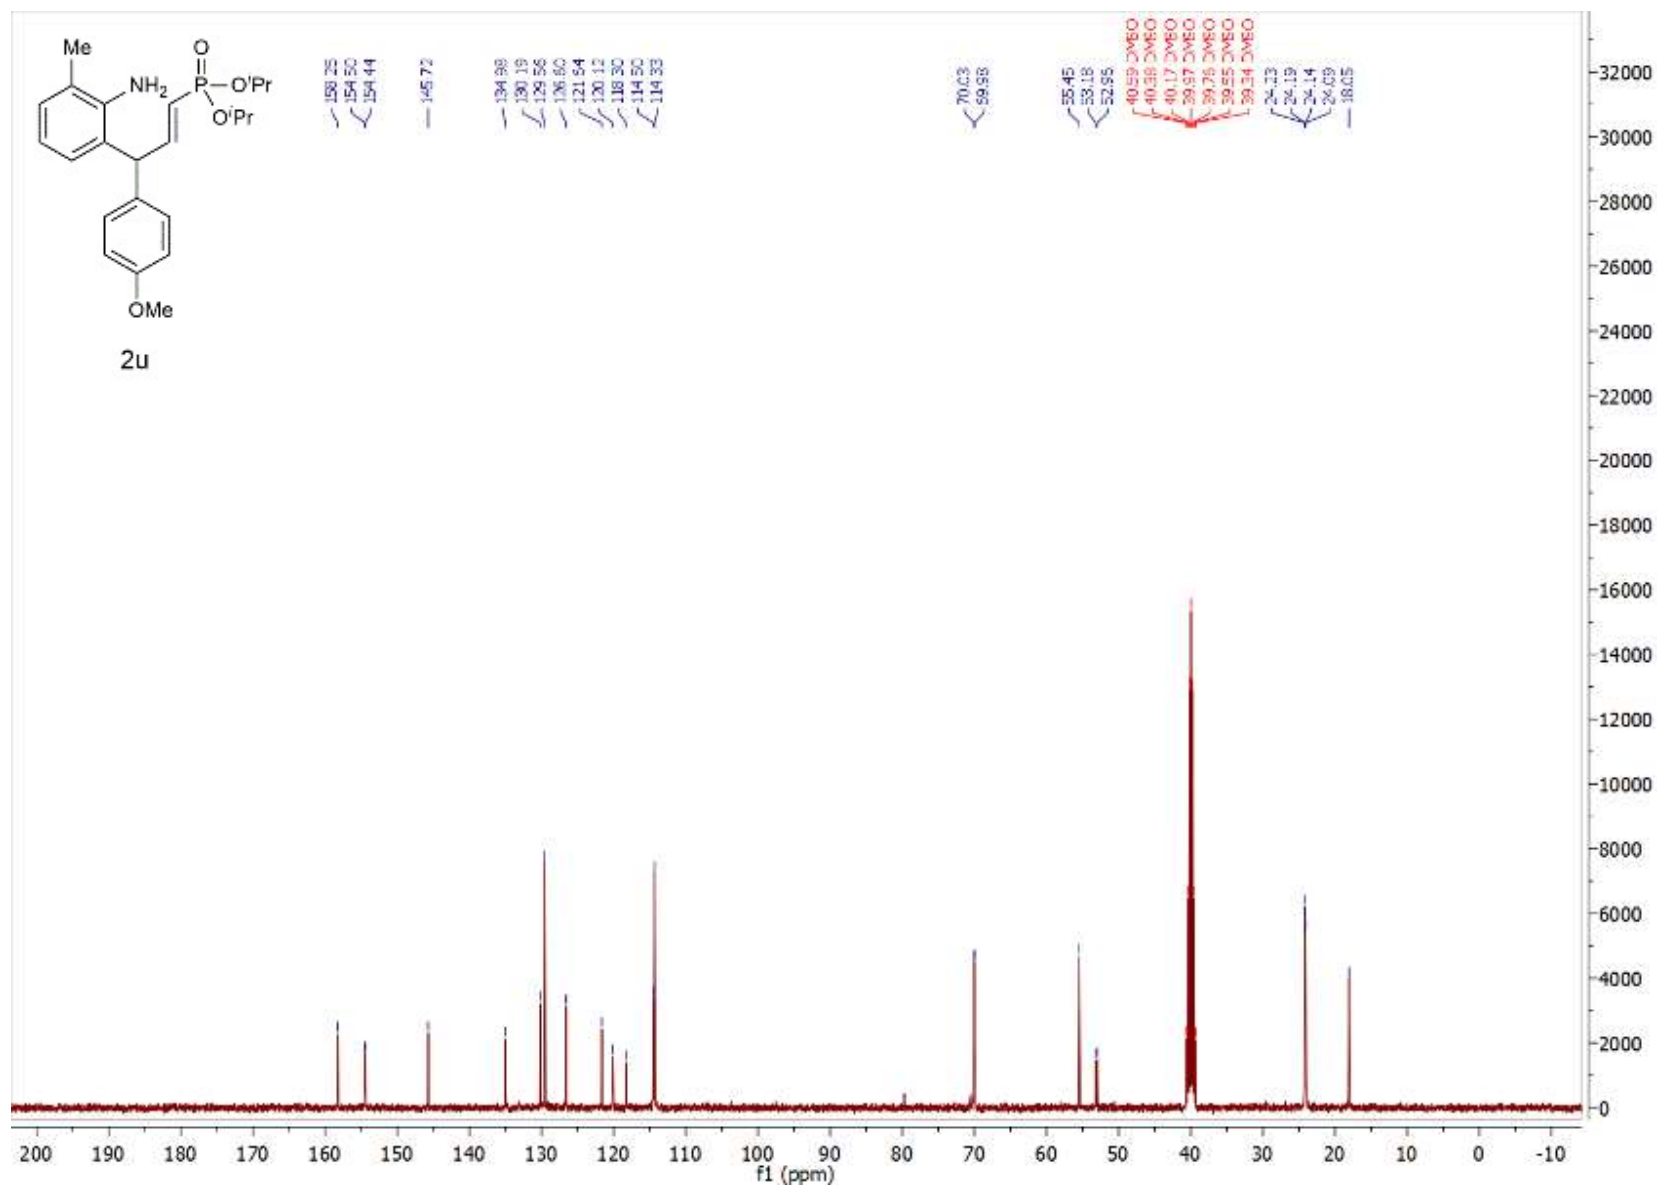

Figure S149: <sup>13</sup>C NMR Spectra of 2u

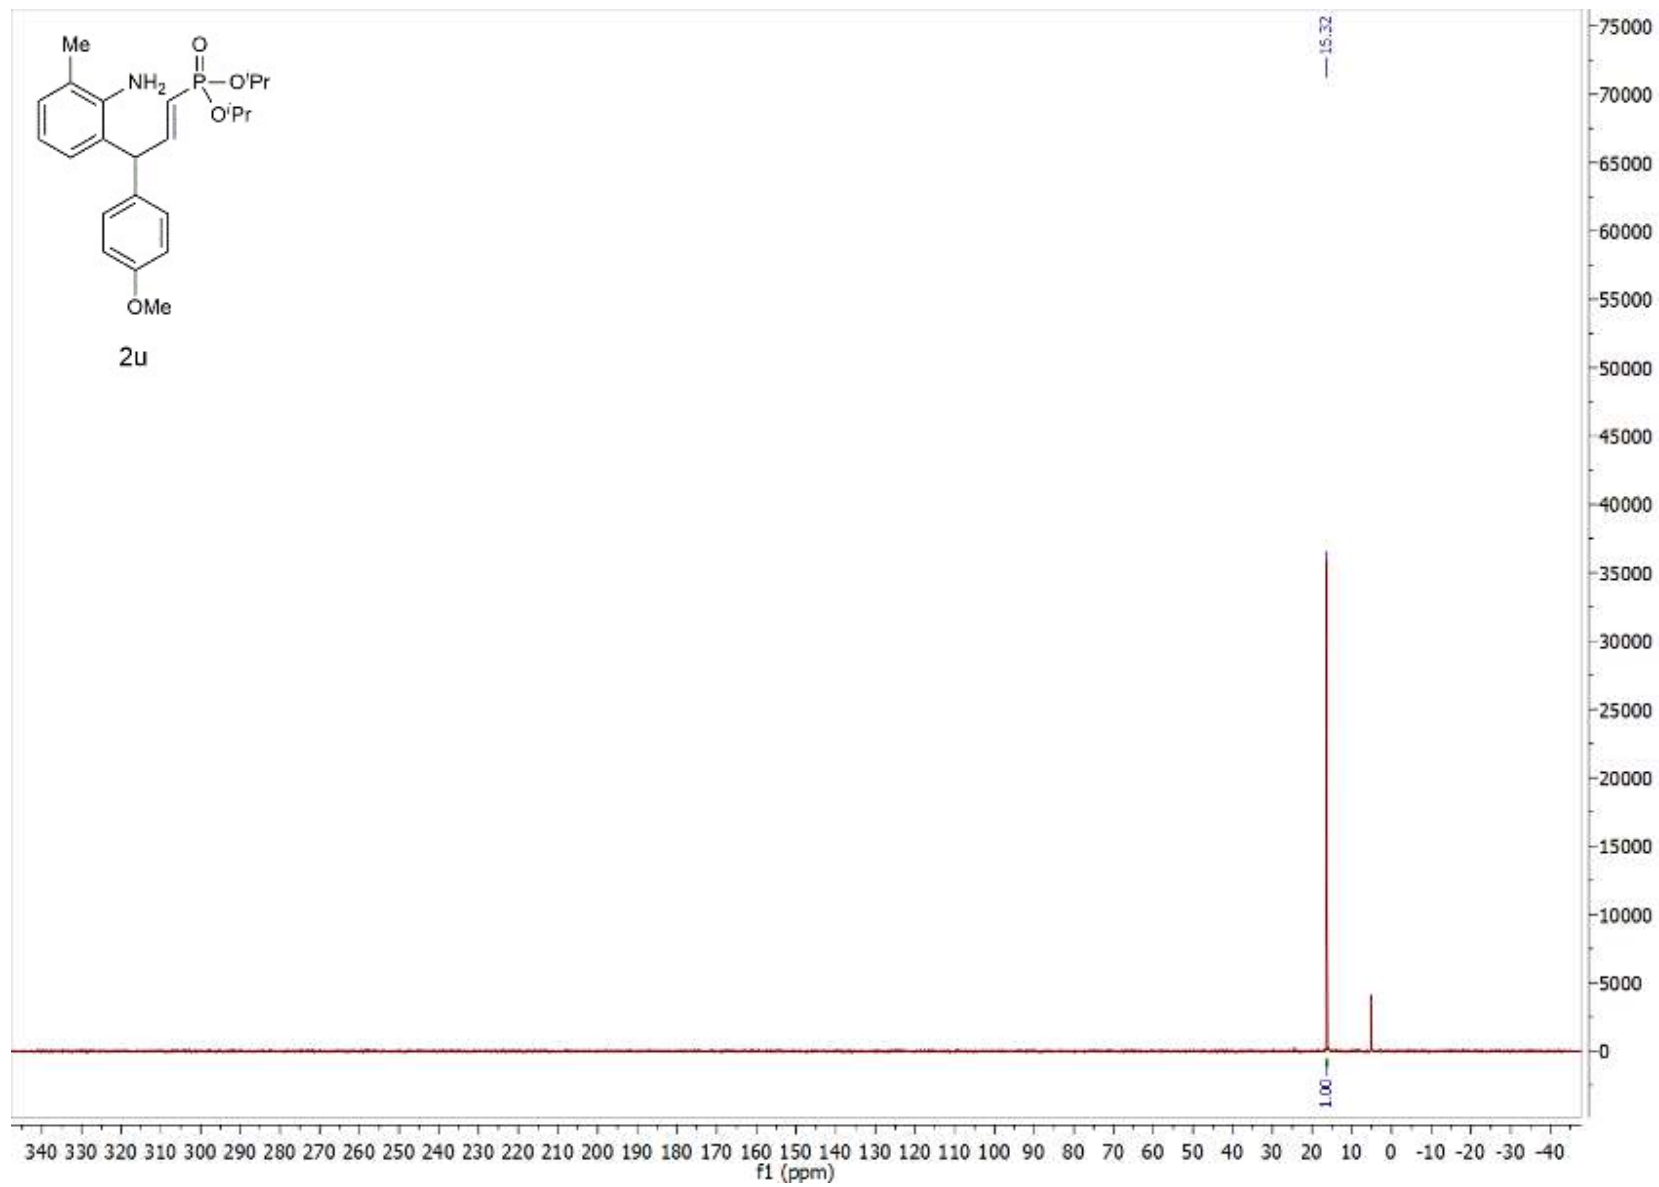

Figure S150:  $^{31}\text{P}$  NMR Spectra of 2u

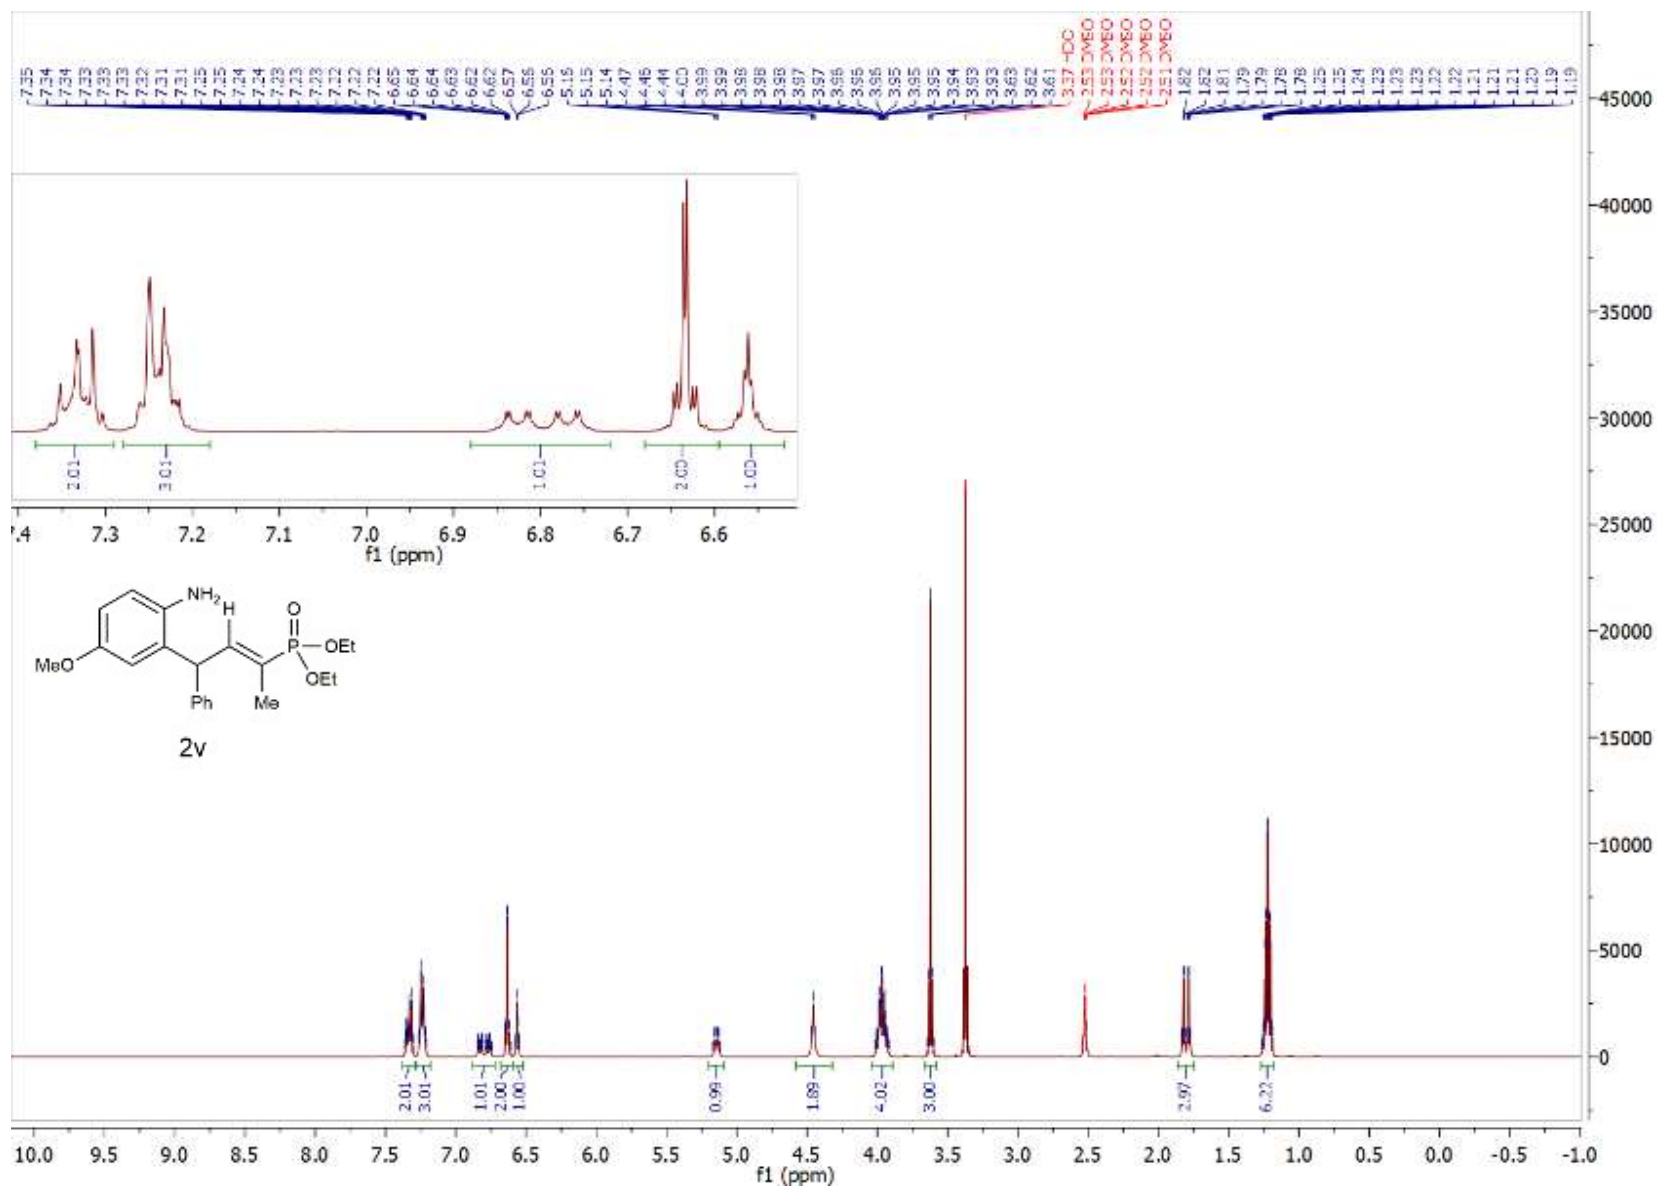

Figure S151: <sup>1</sup>H NMR Spectra of 2v



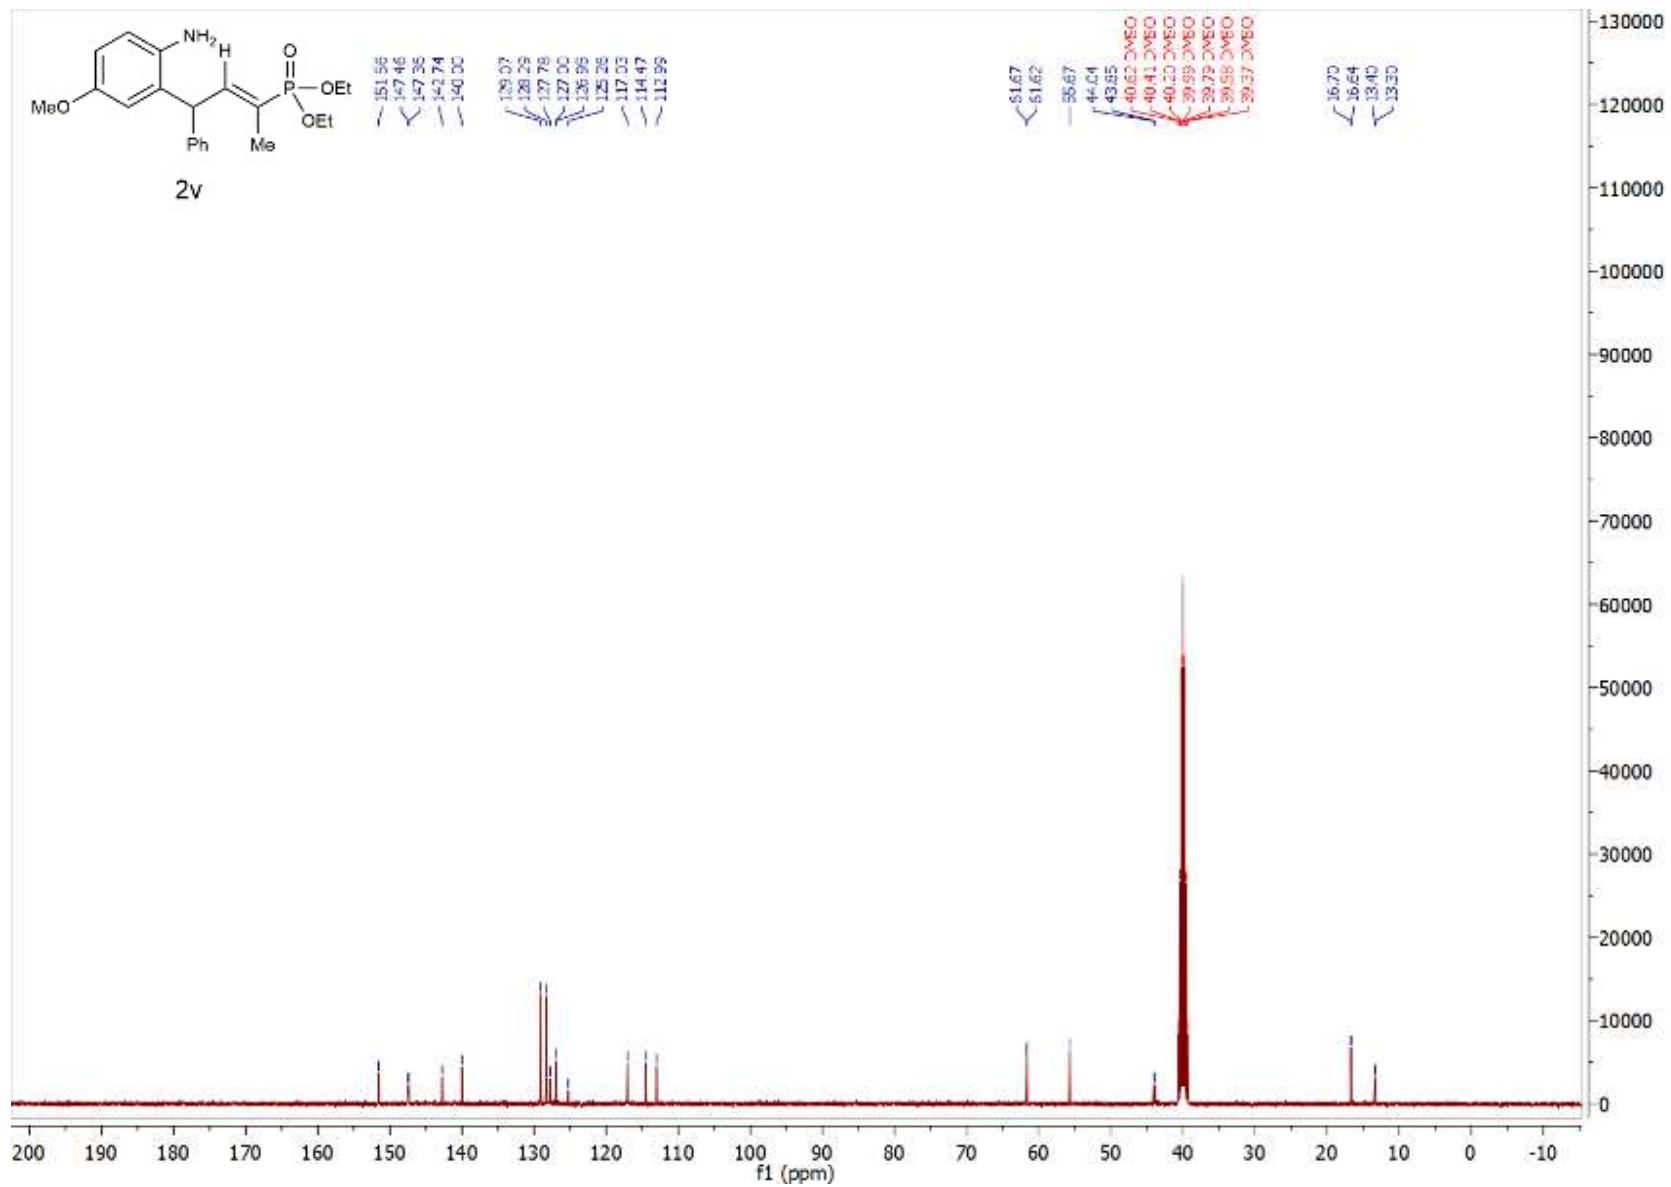

Figure S152: <sup>13</sup>C NMR Spectra of 2v

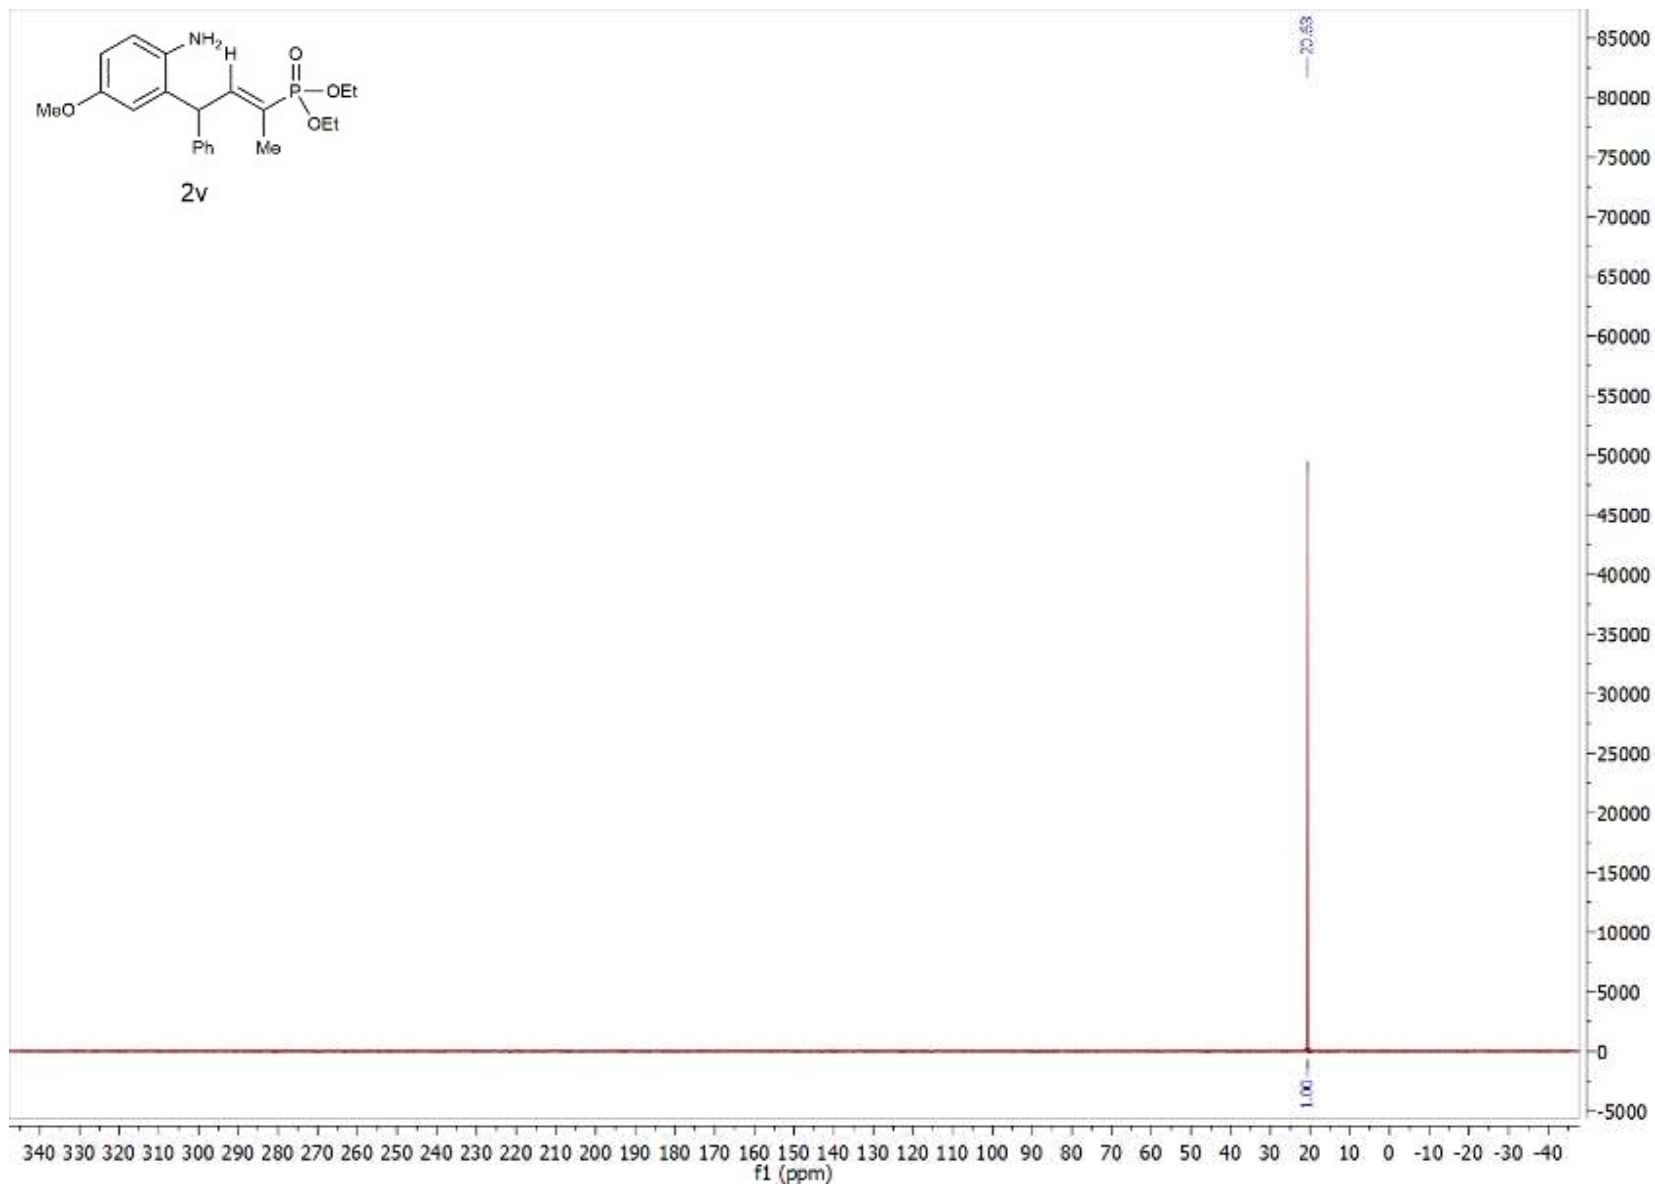

Figure S153: <sup>31</sup>P NMR Spectra of **2v**

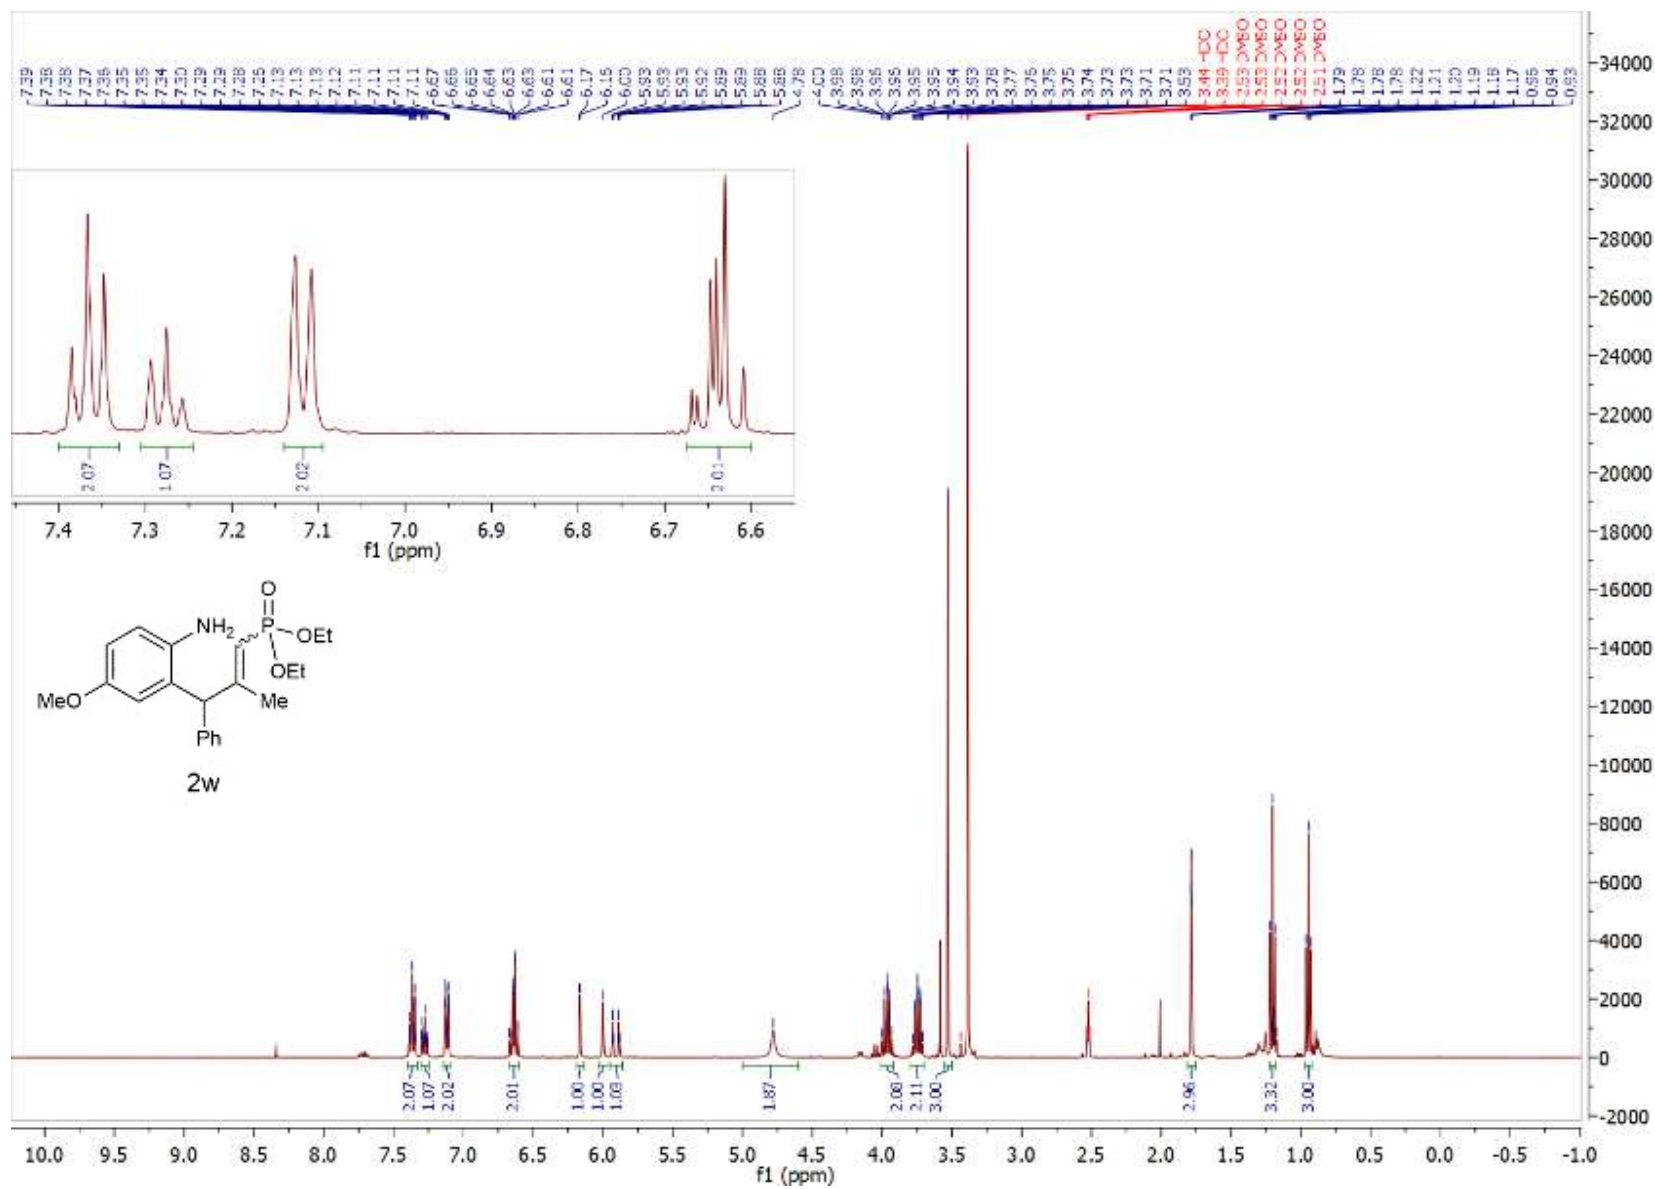

Figure S154: <sup>1</sup>H NMR Spectra of 2w

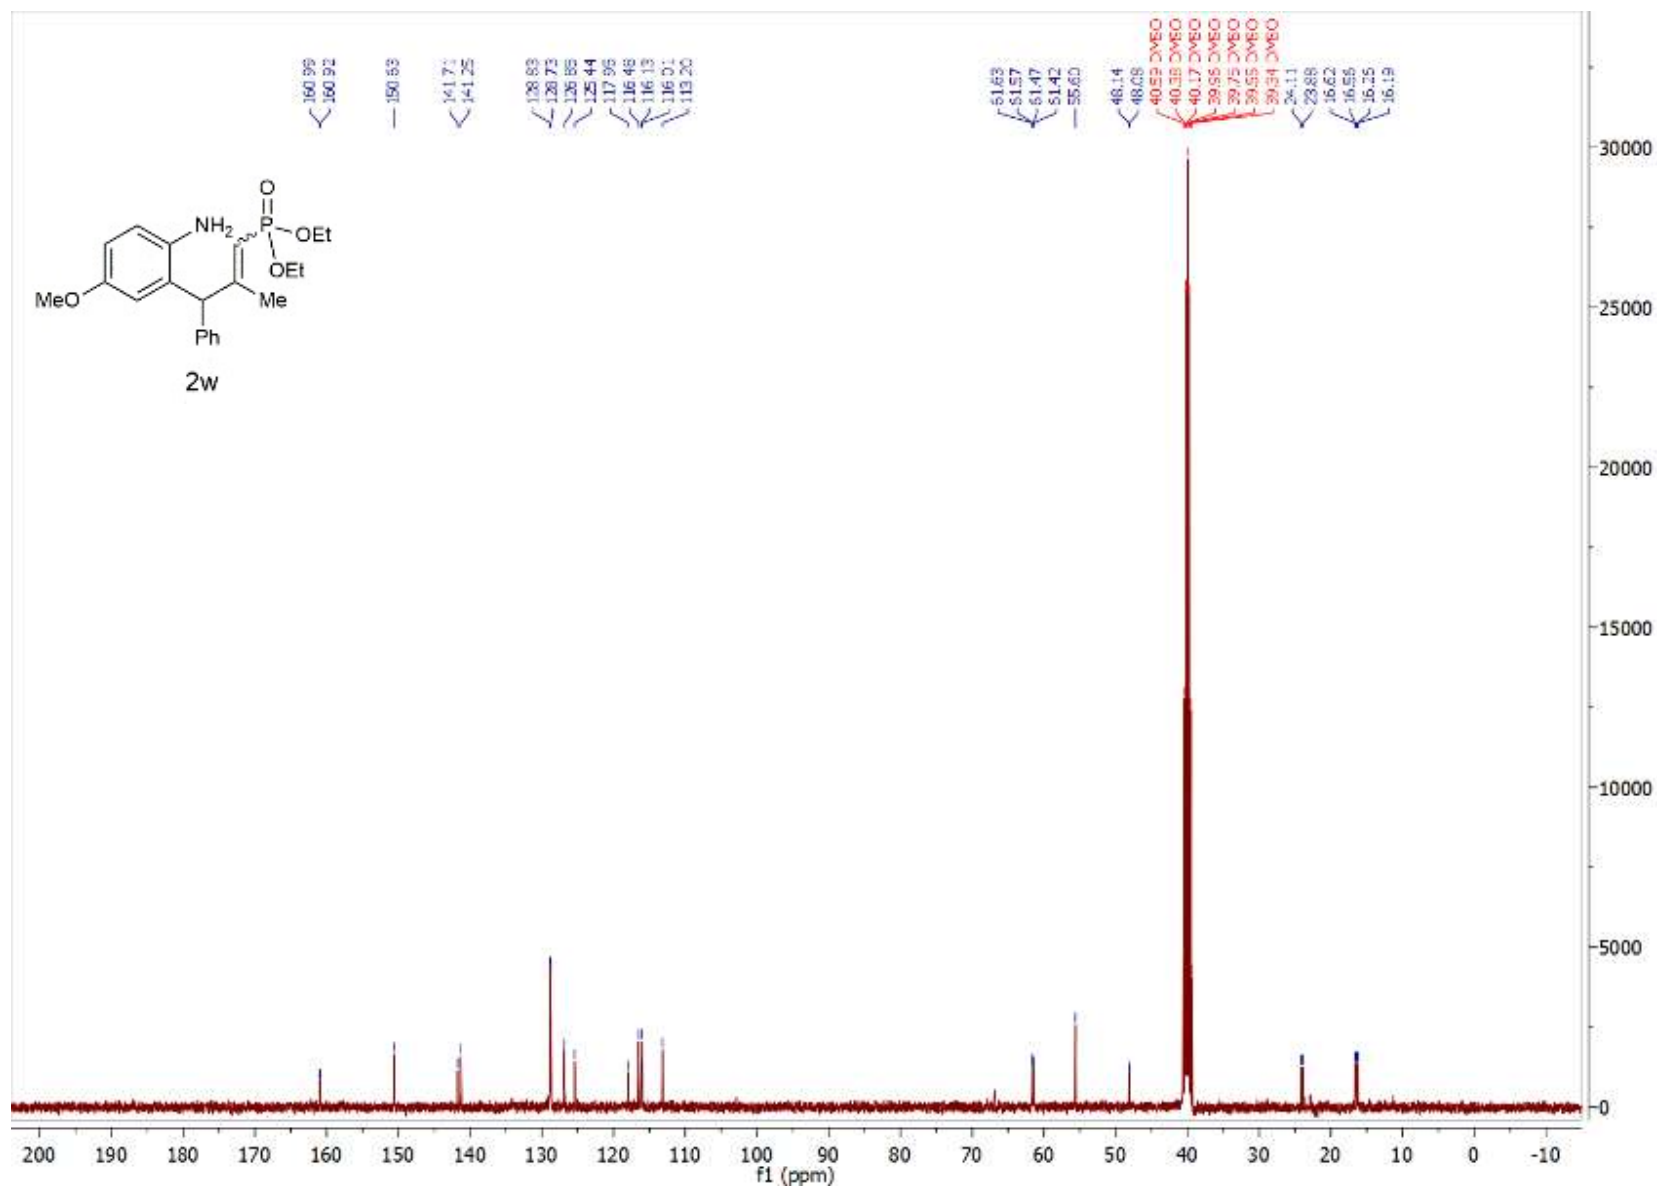

Figure S155: <sup>13</sup>C NMR Spectra of 2w

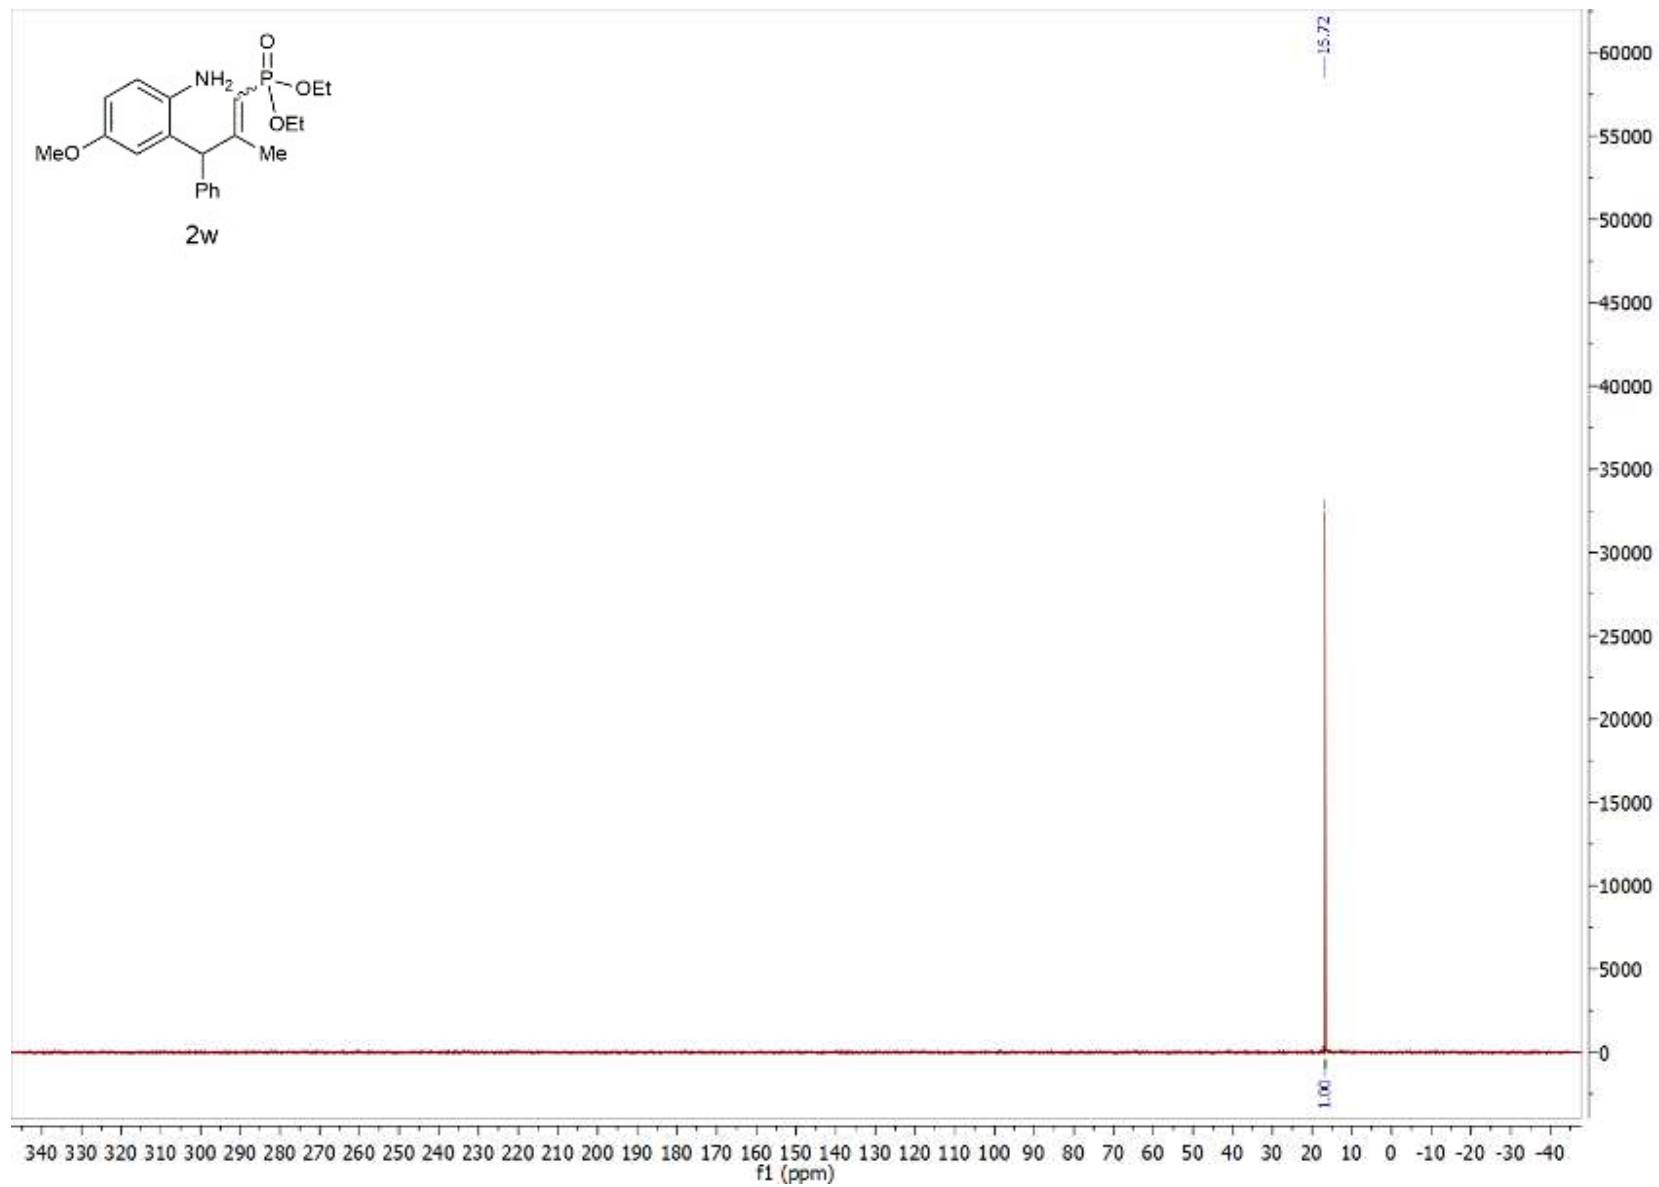

Figure S156:  $^{31}\text{P}$  NMR Spectra of 2w



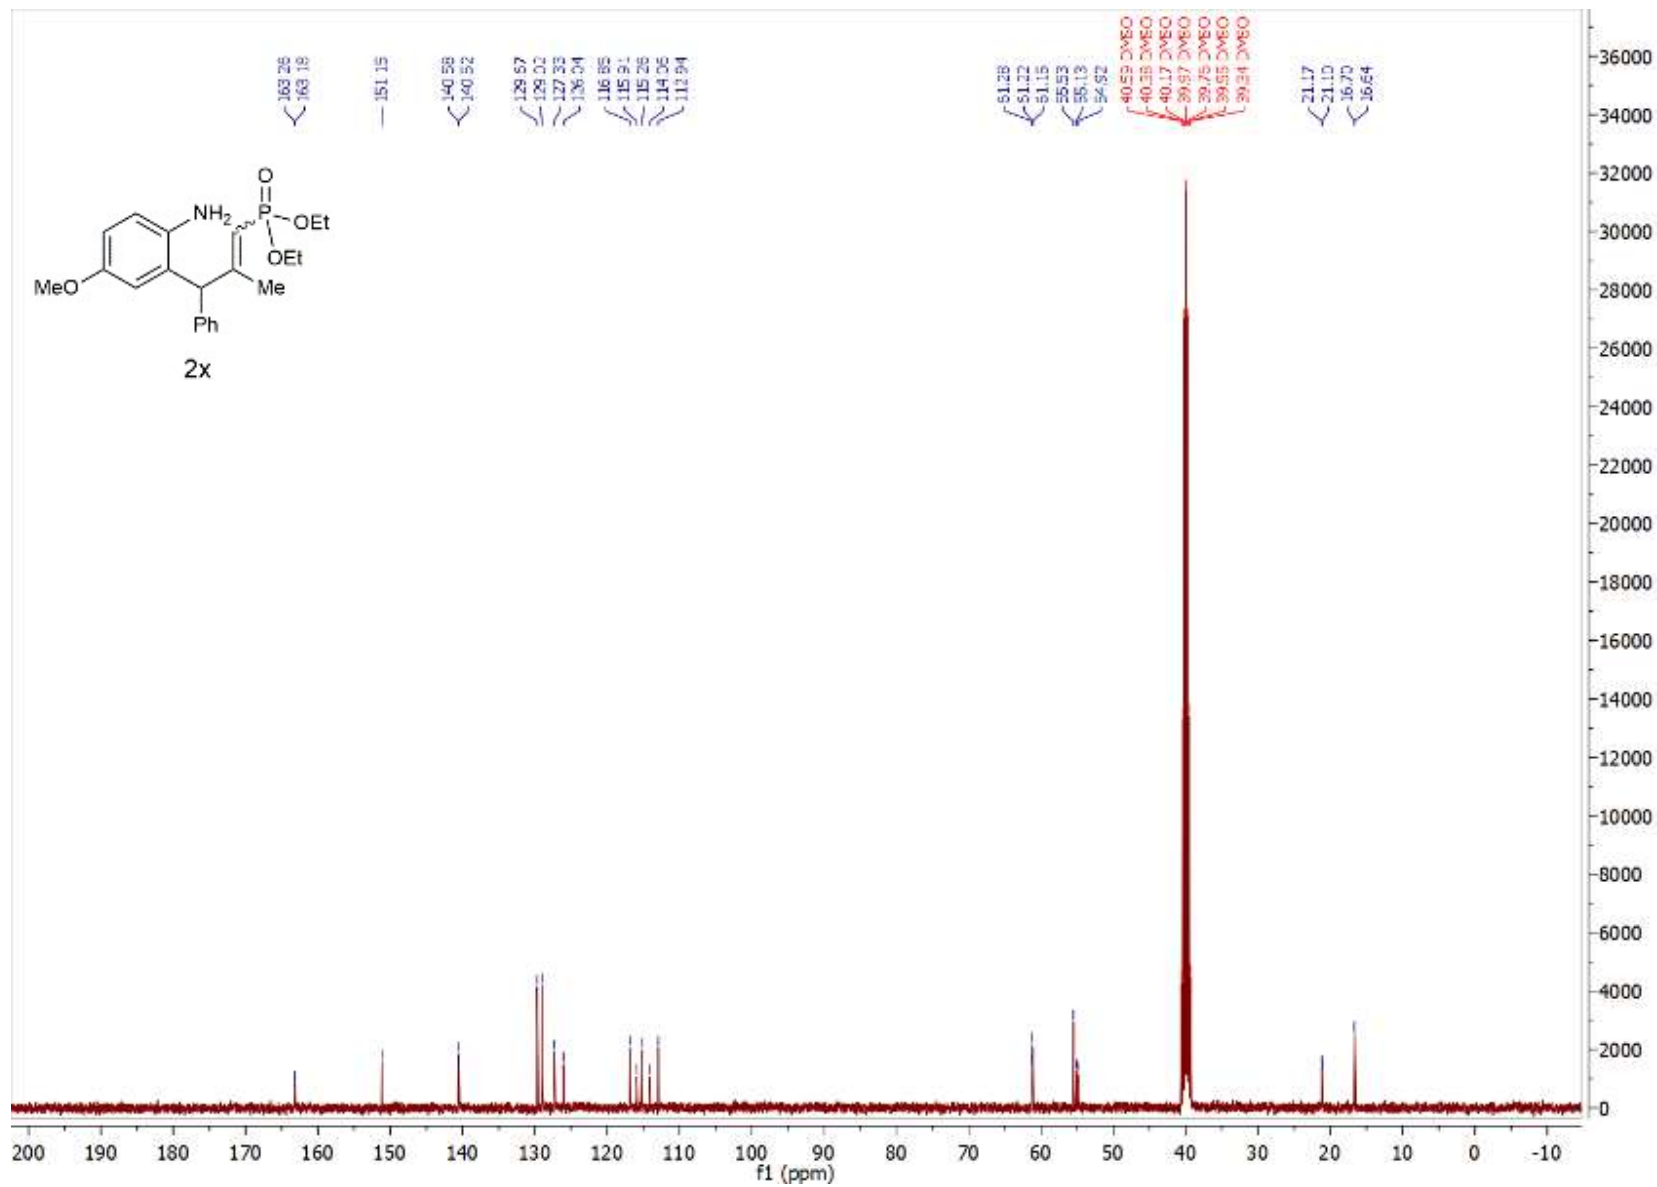

Figure S158:  $^{13}\text{C}$  NMR Spectra of 2x

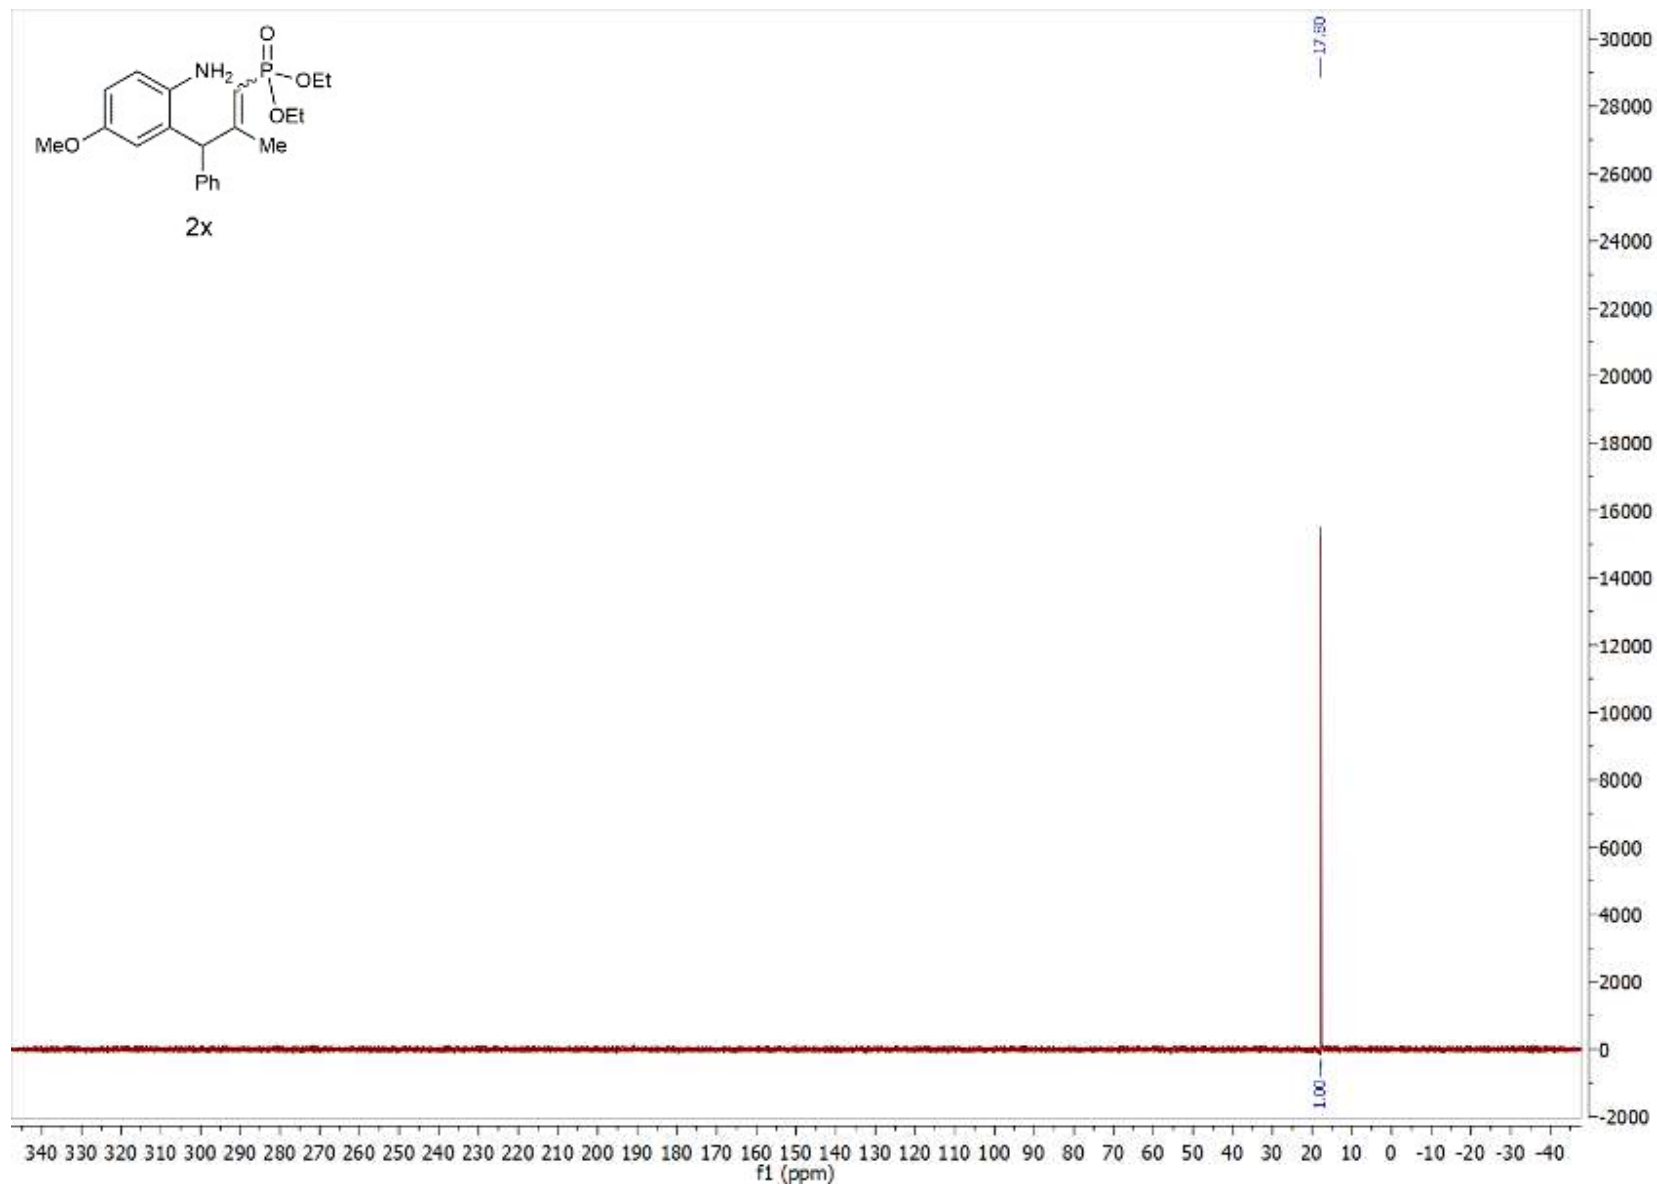

Figure S159:  $^{31}\text{P}$  NMR Spectra of 2x



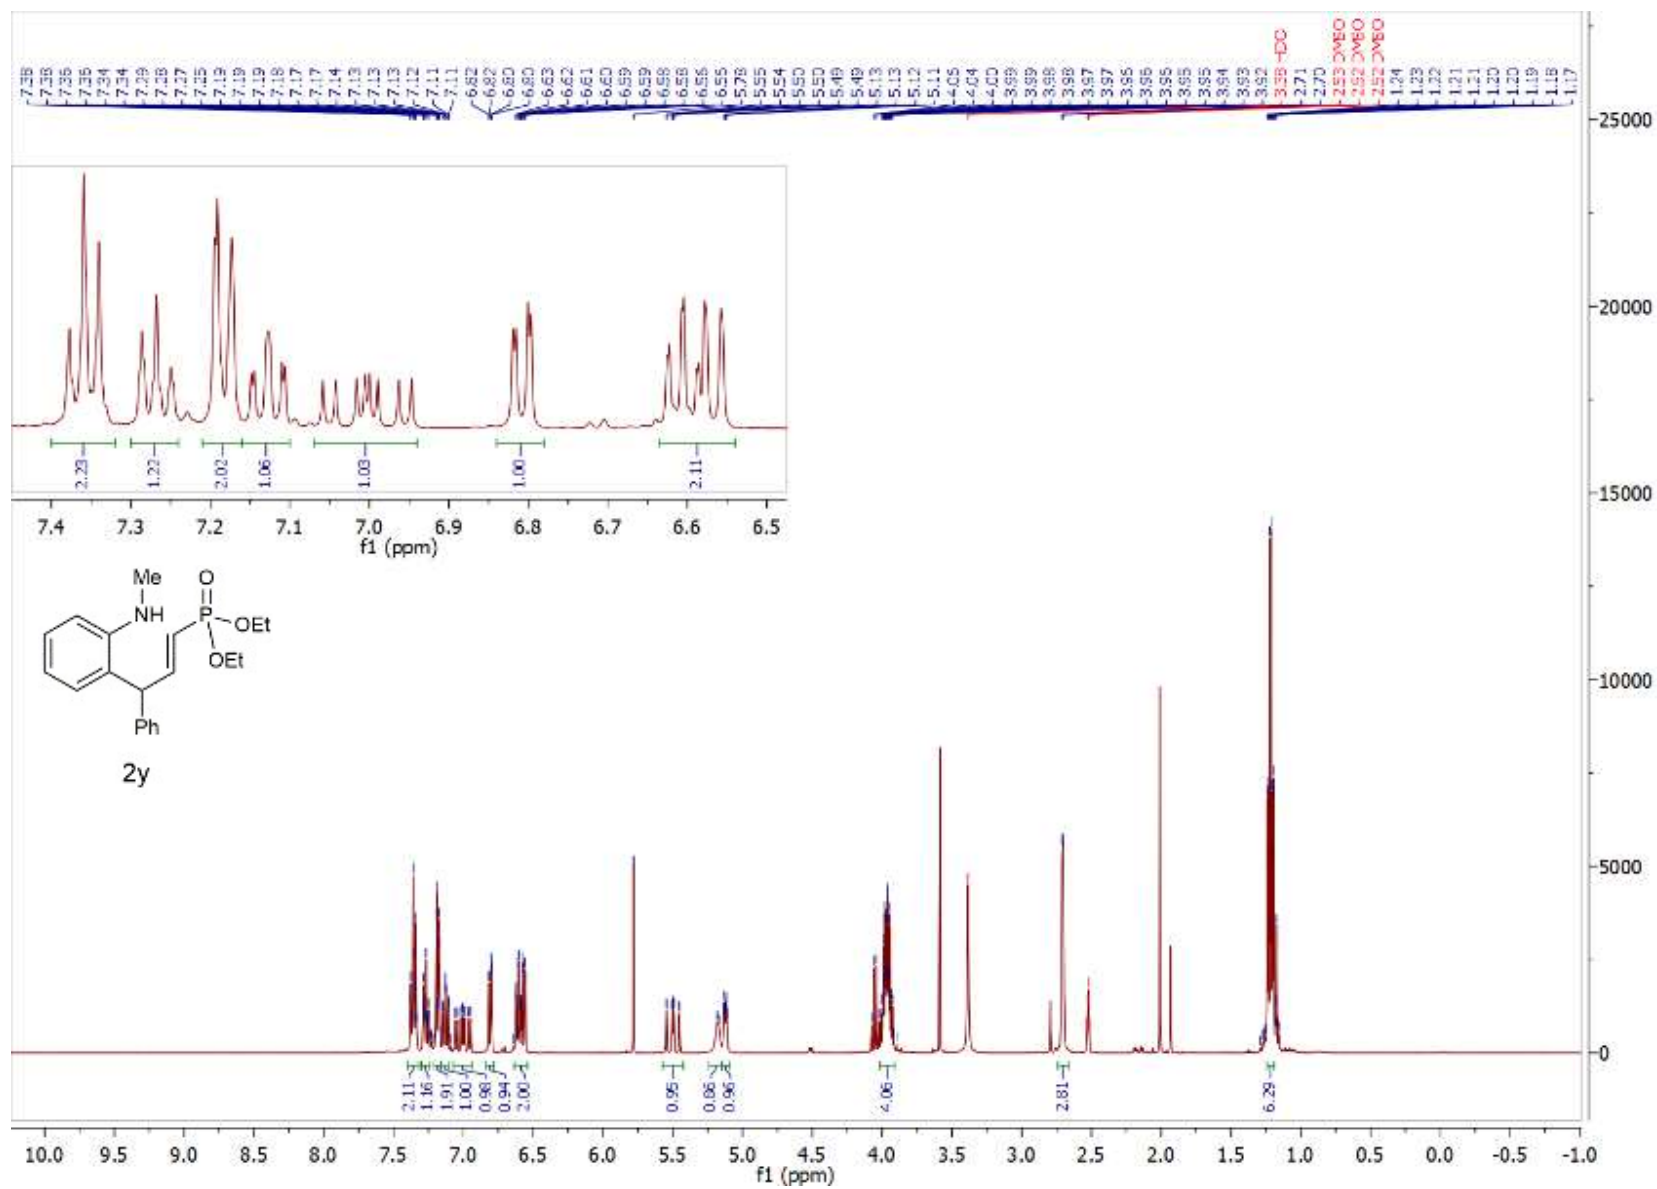

Figure S160: <sup>1</sup>H NMR Spectra of 2y

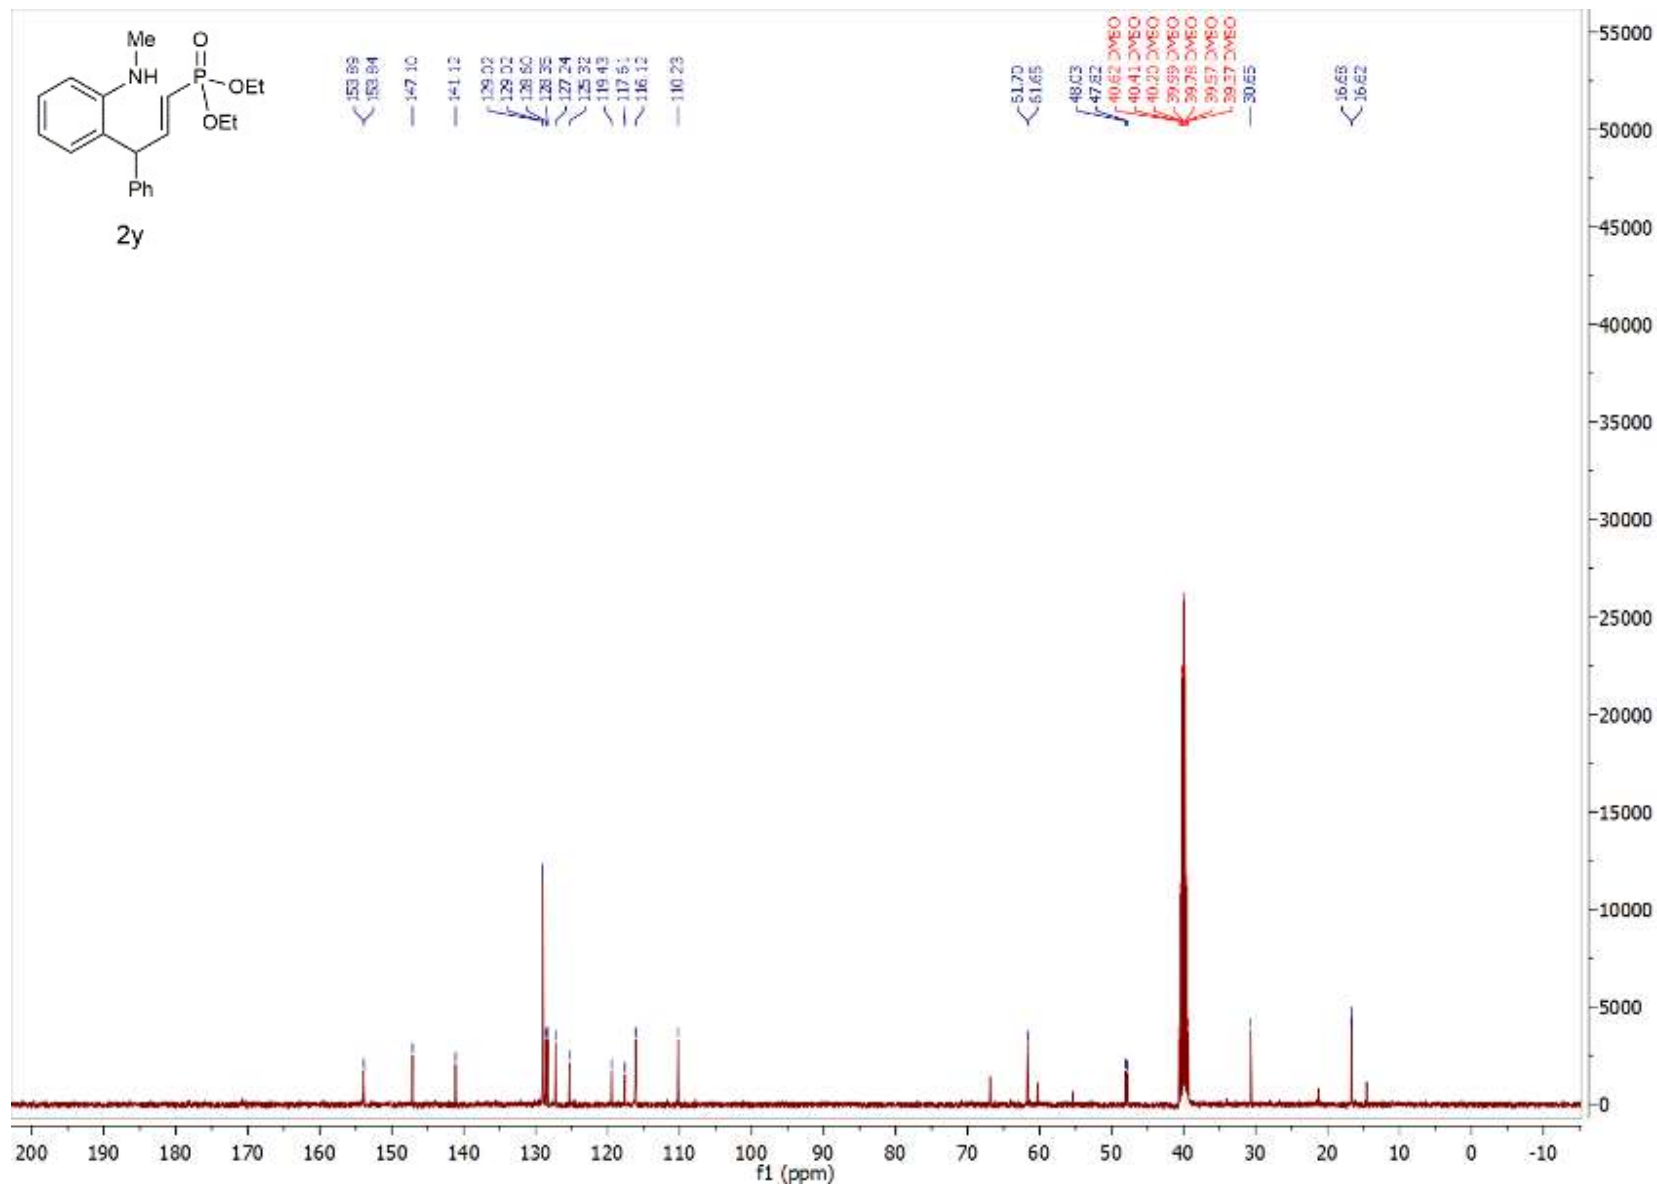

Figure S161:  $^{13}\text{C}$  NMR Spectra of 2y

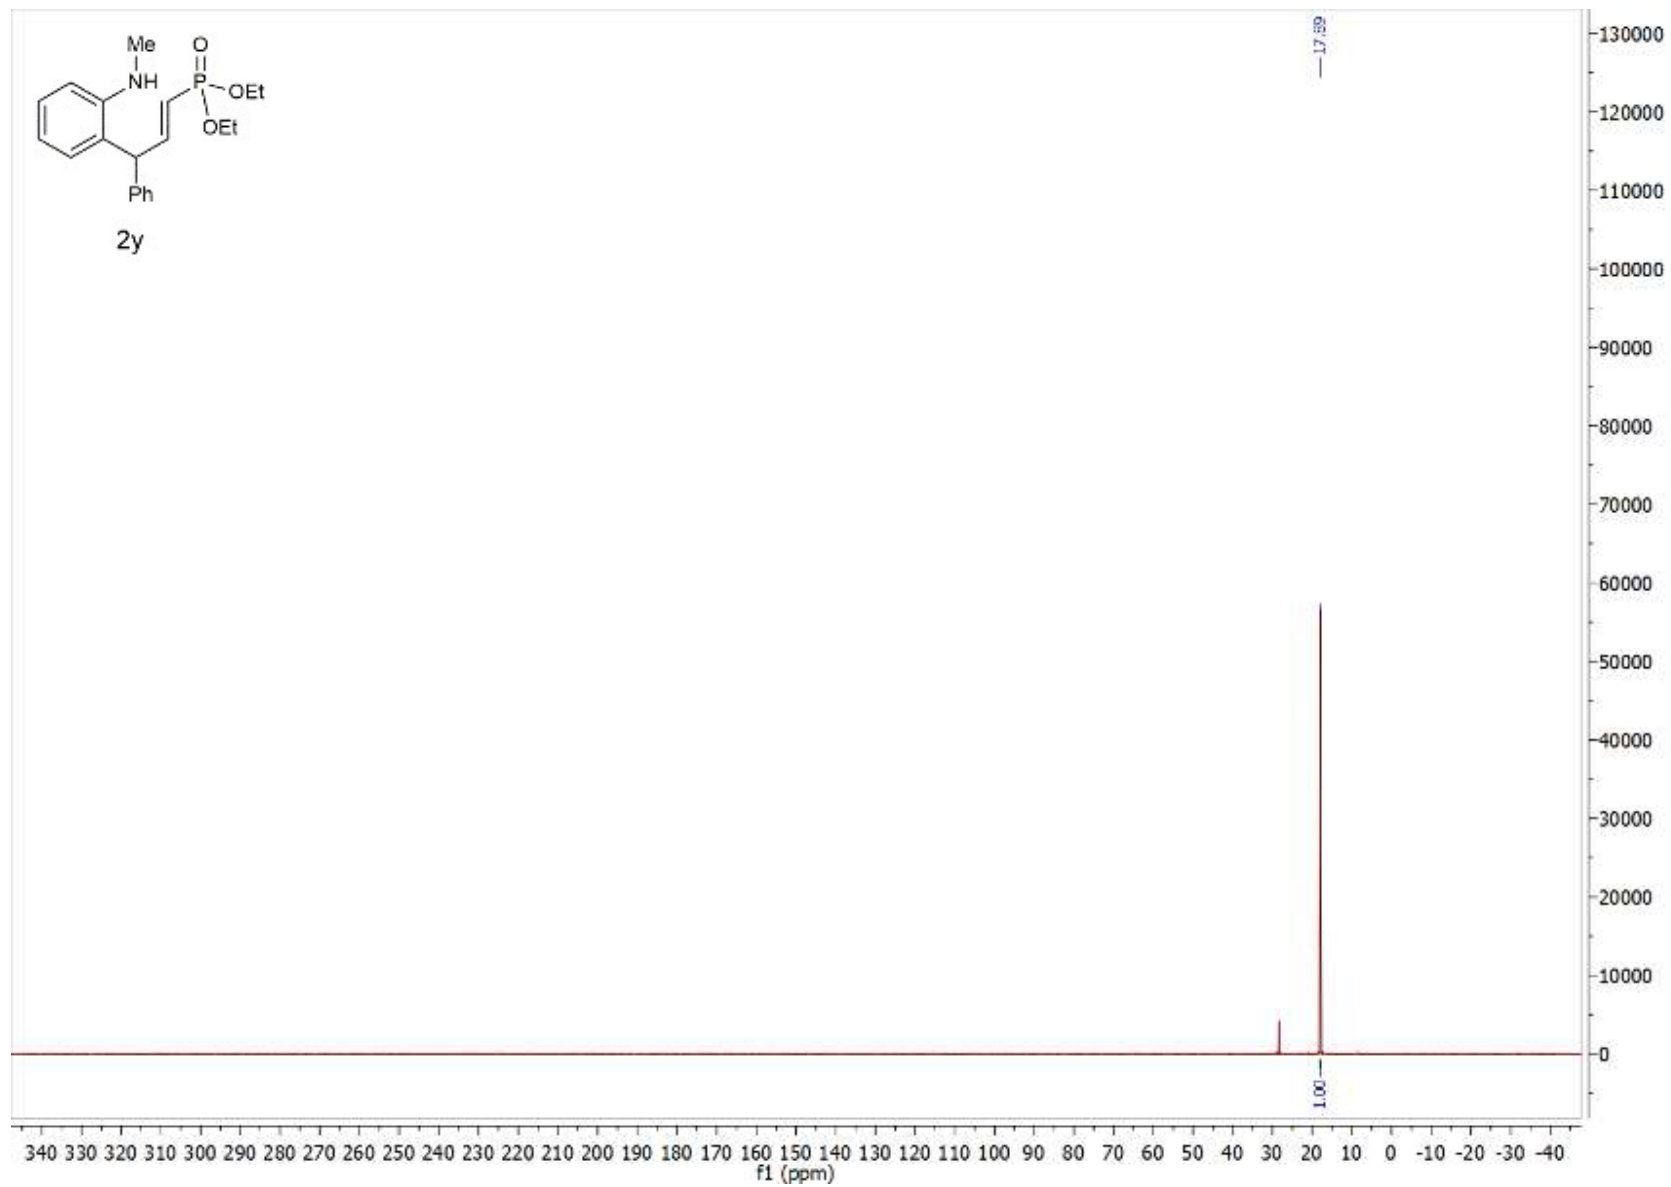

Figure S162:  $^{31}\text{P}$  NMR Spectra of 2y

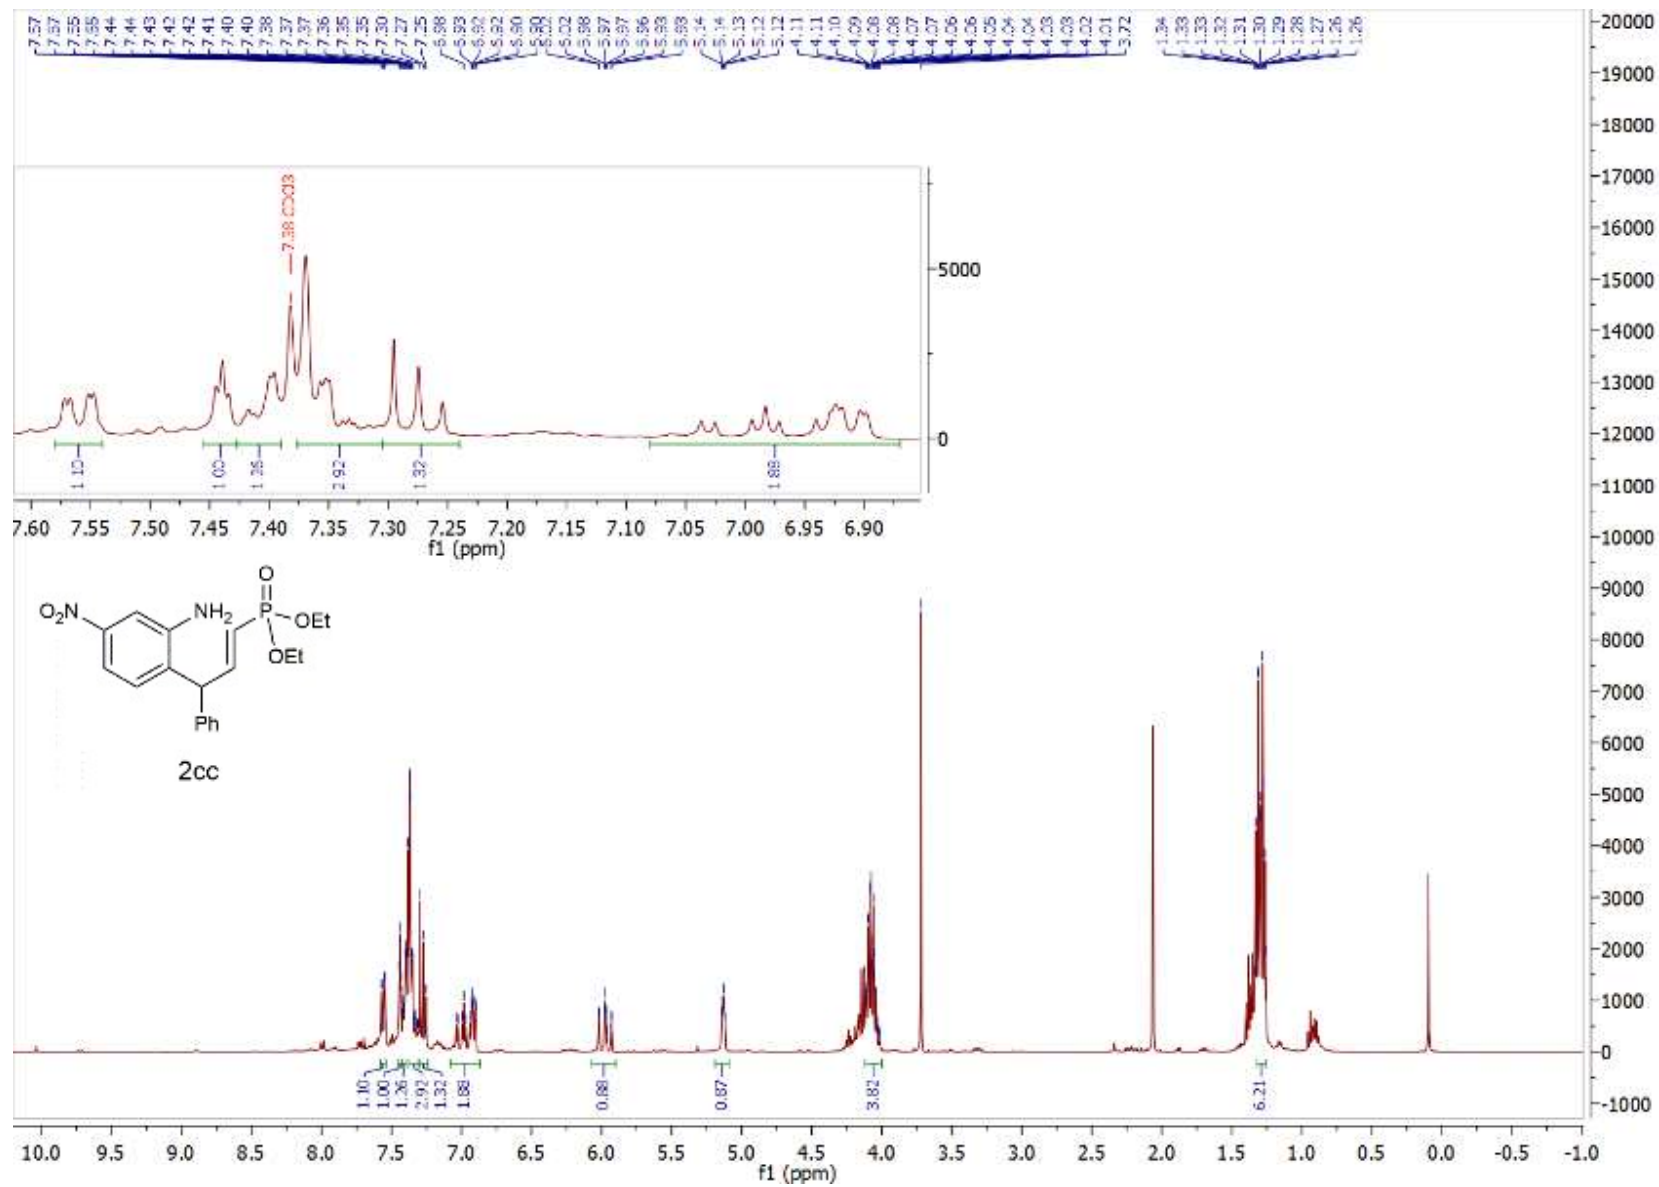

Figure S163: <sup>1</sup>H NMR Spectra of 2cc

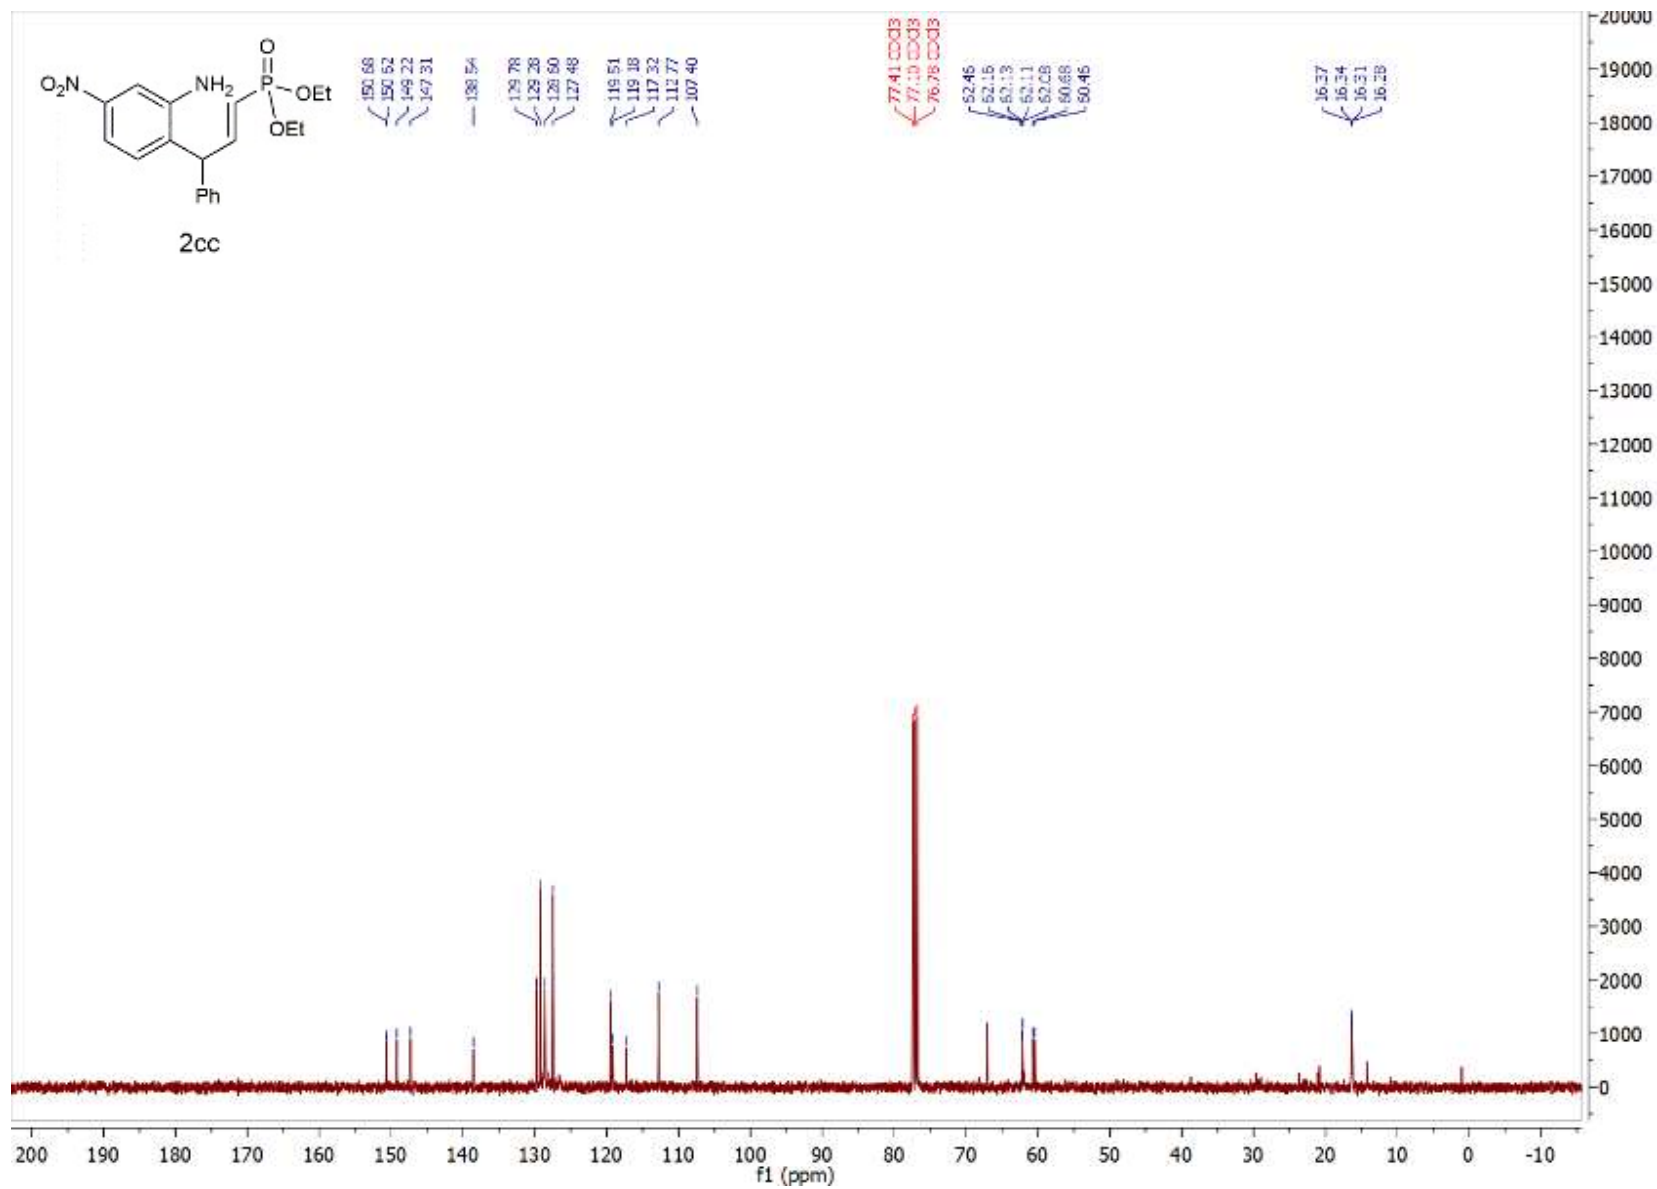

Figure S164: <sup>13</sup>C NMR Spectra of 2cc

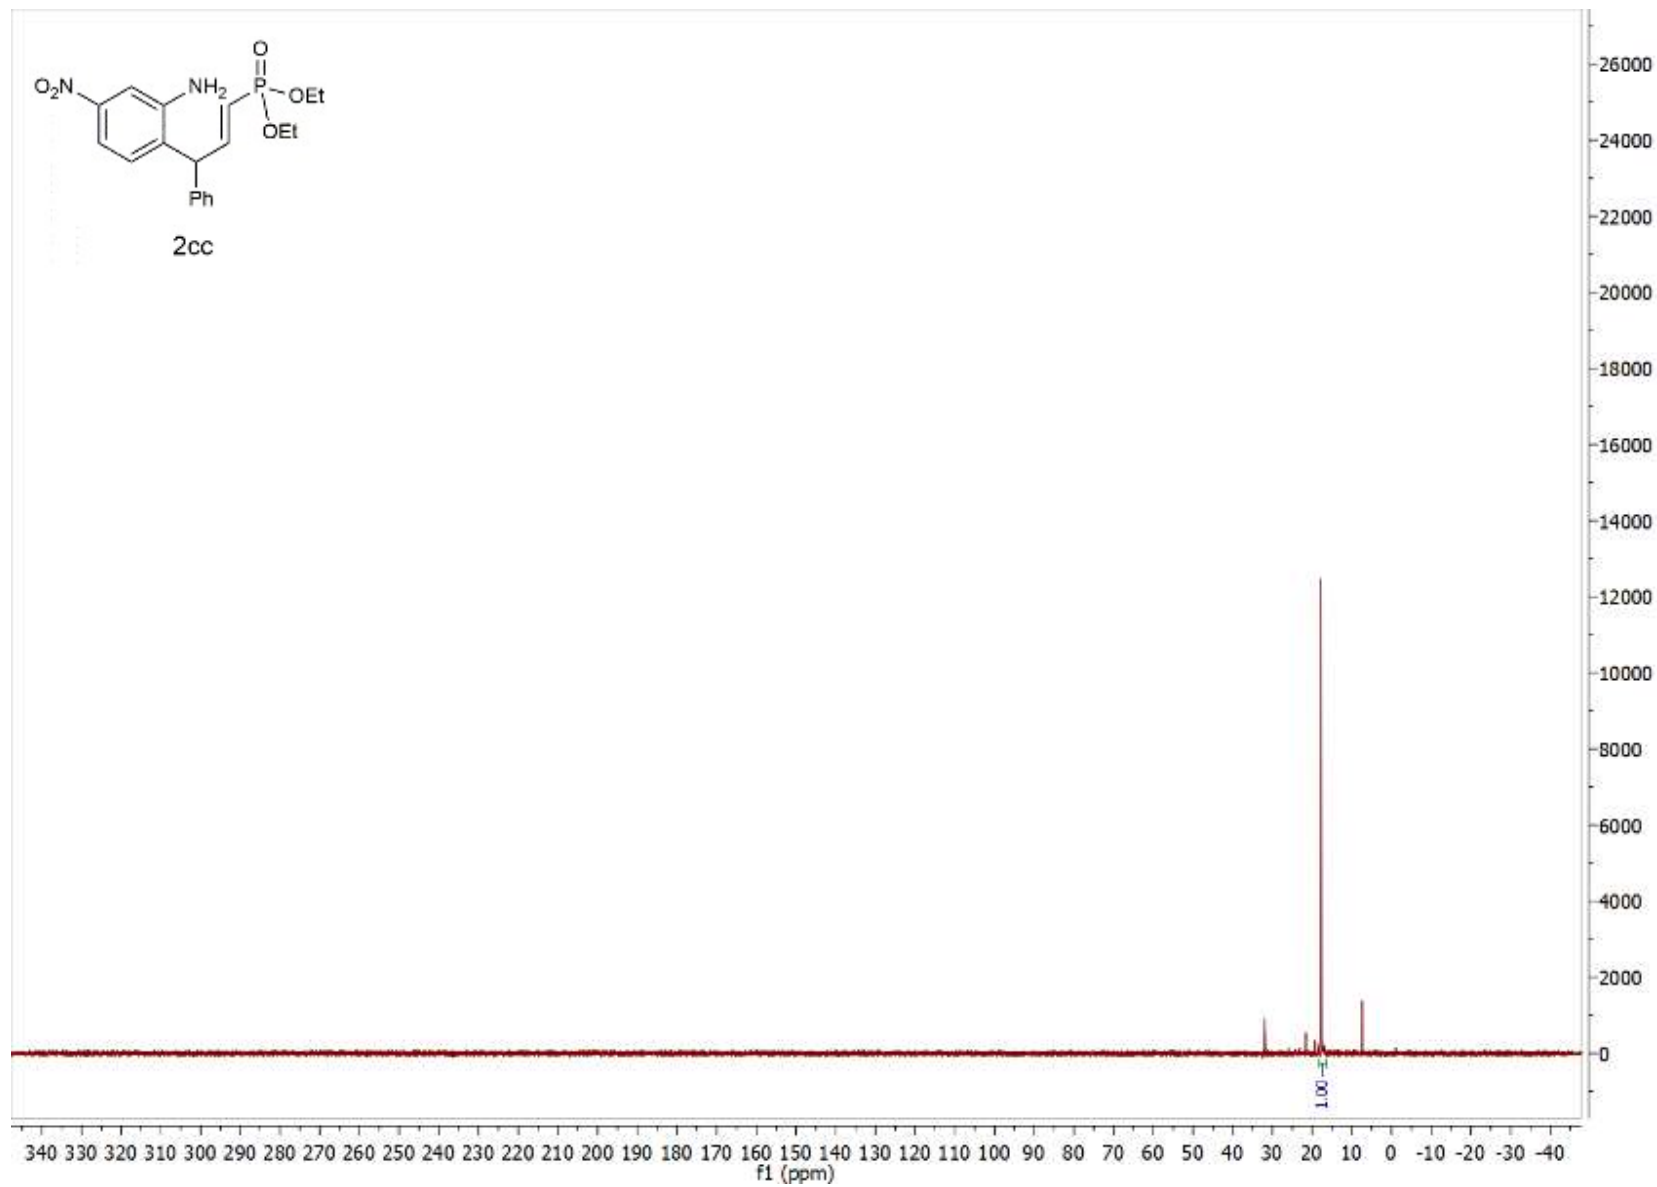

Figure S165:  $^{31}\text{P}$  NMR Spectra of 2cc

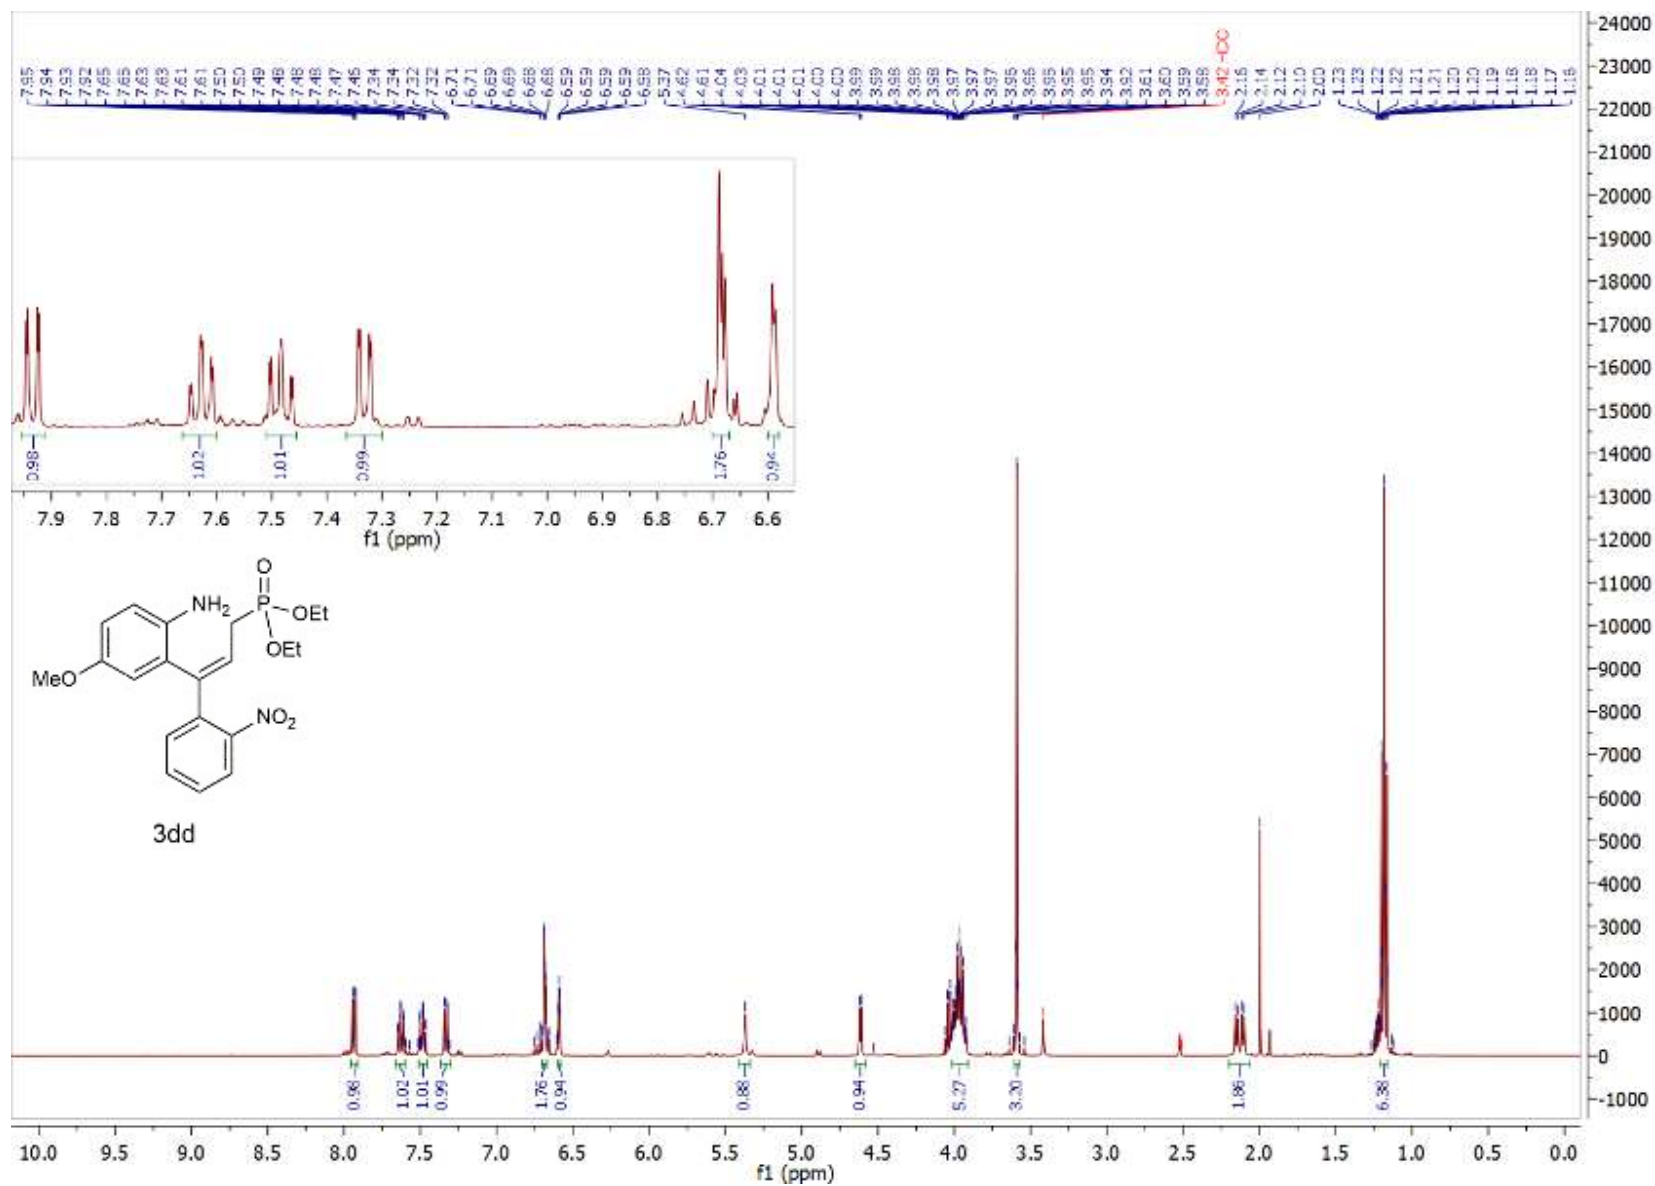

Figure S166: <sup>1</sup>H NMR Spectra of 3dd

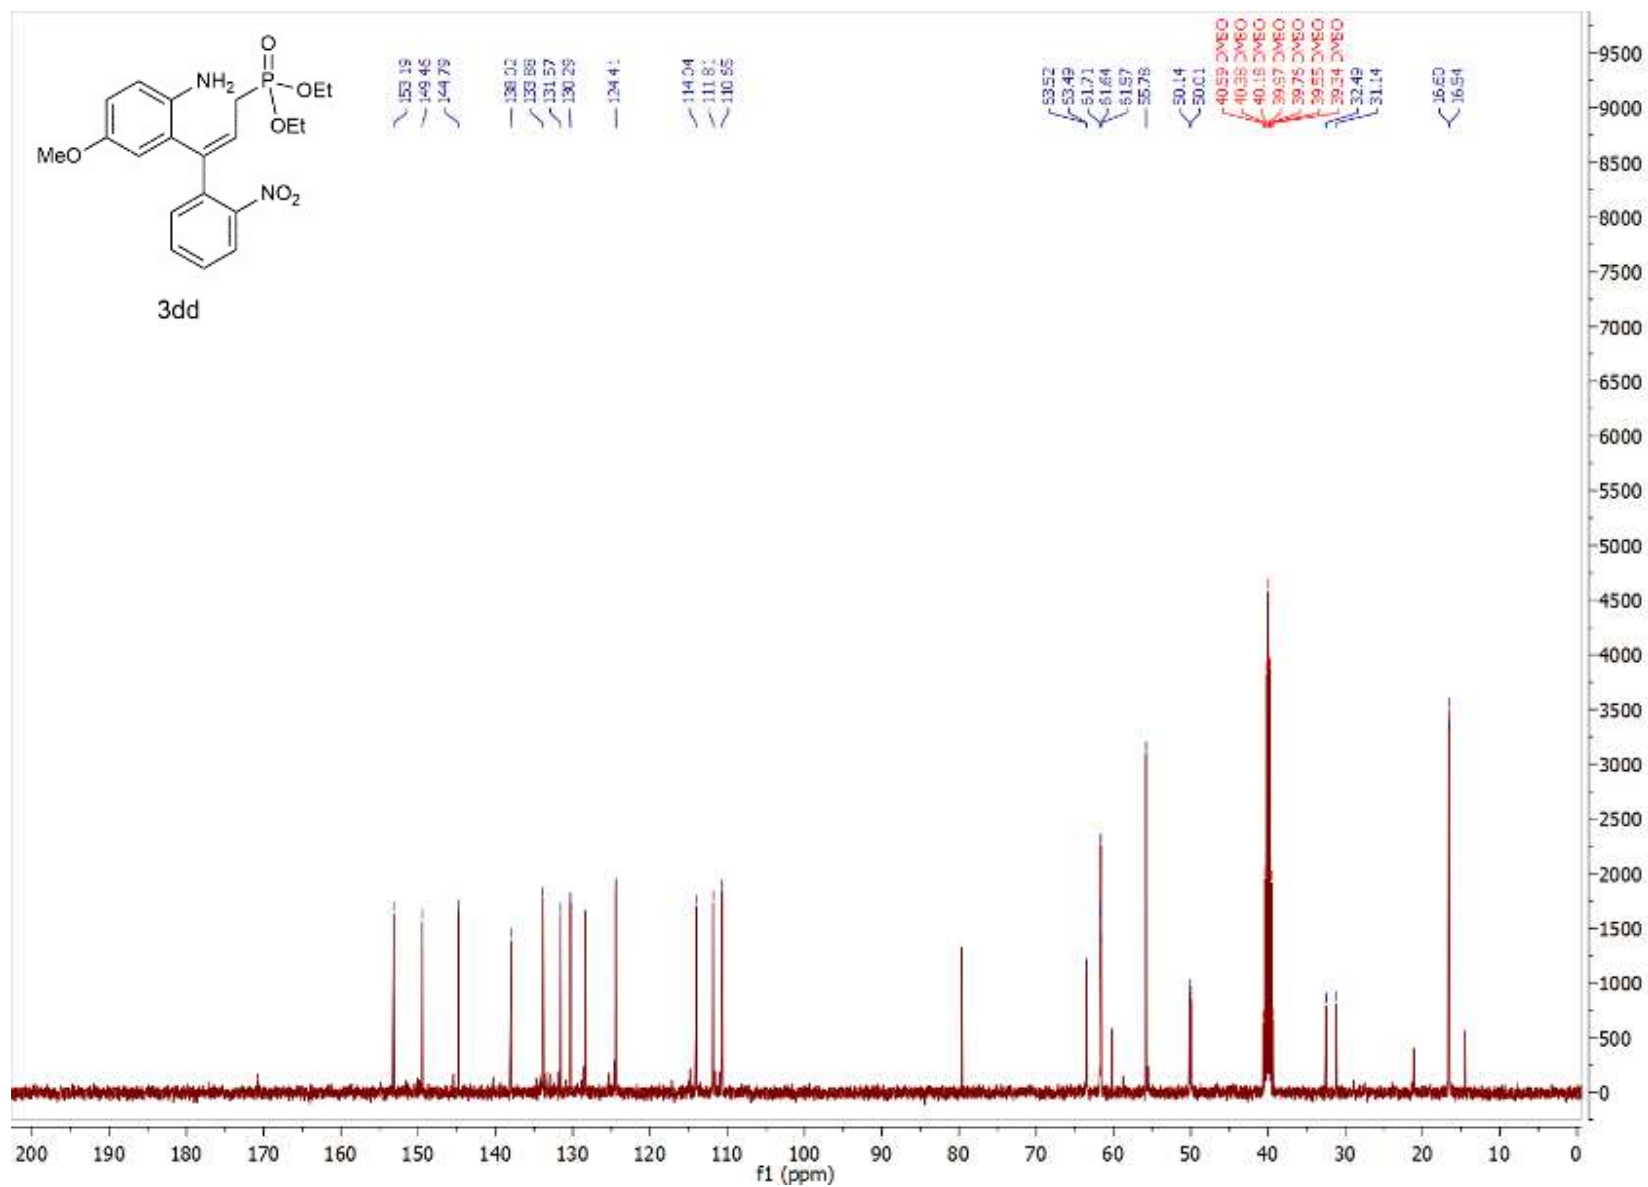

Figure S167: <sup>13</sup>C NMR Spectra of 3dd



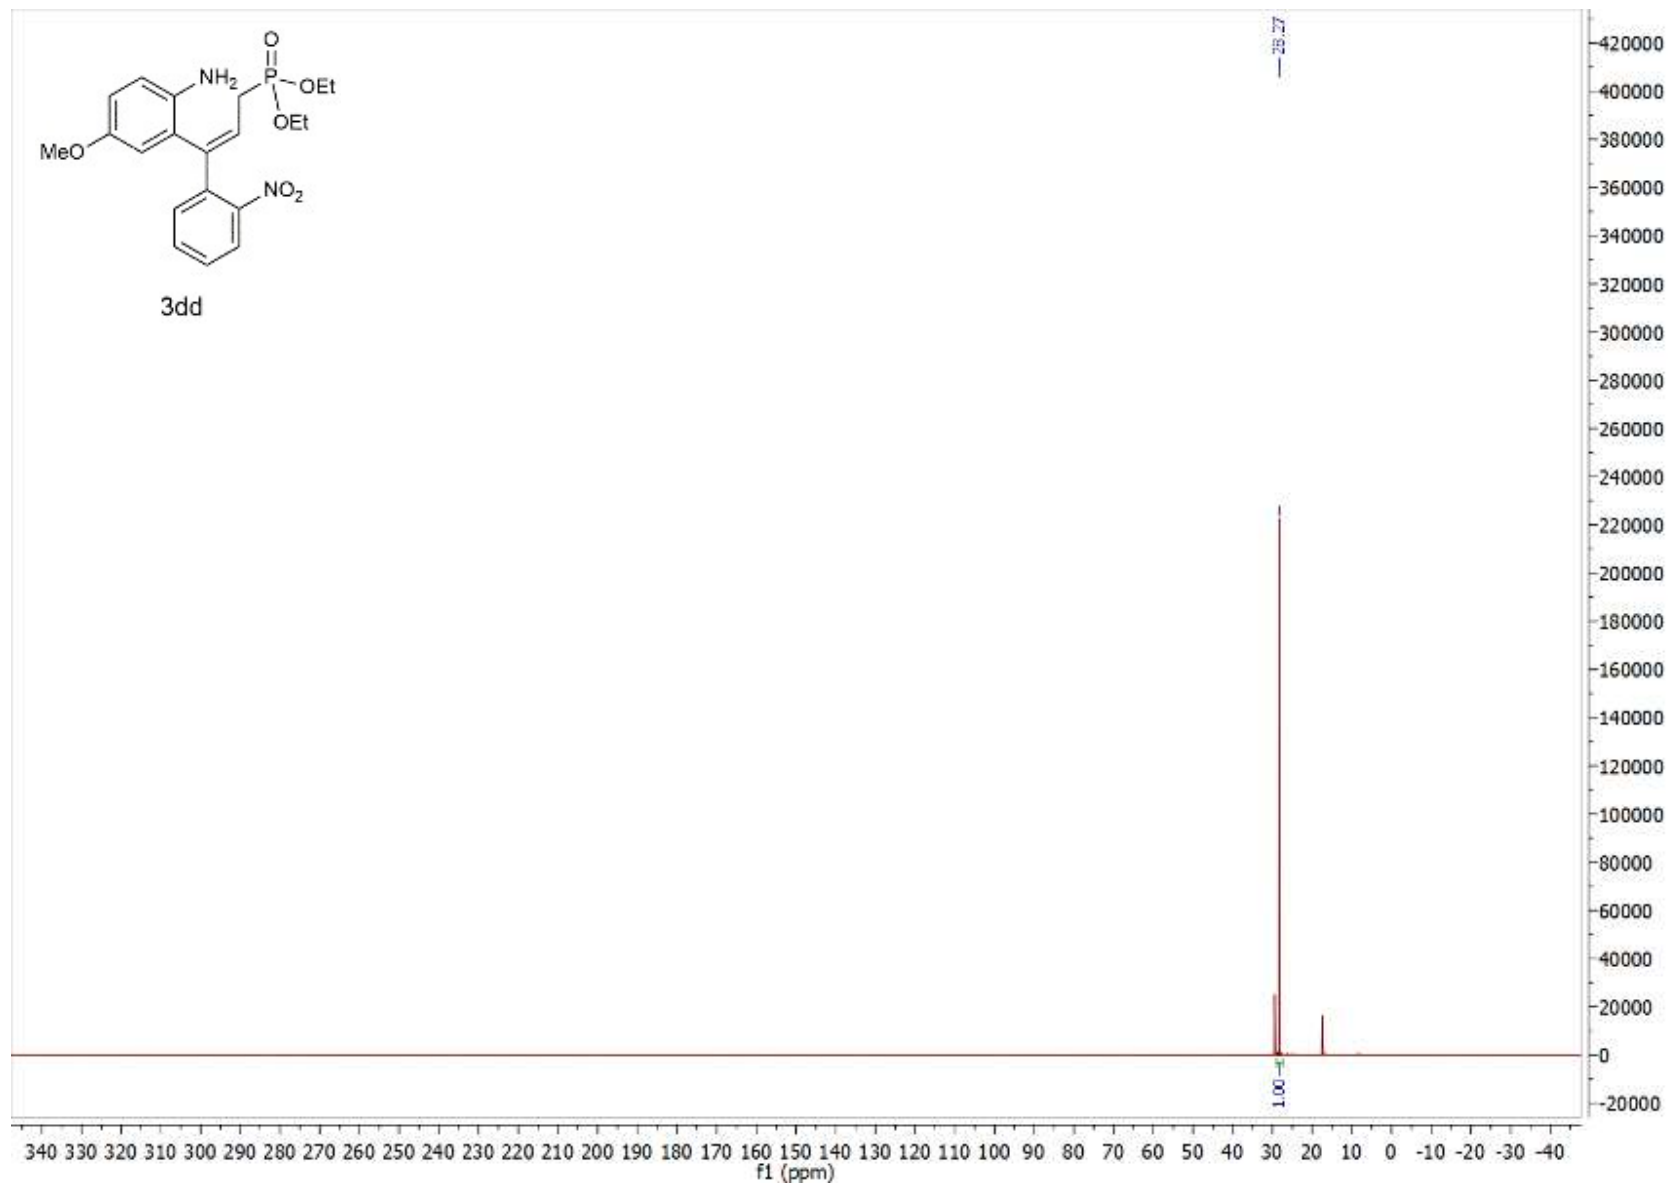

Figure S168:  $^{31}\text{P}$  NMR Spectra of 3dd

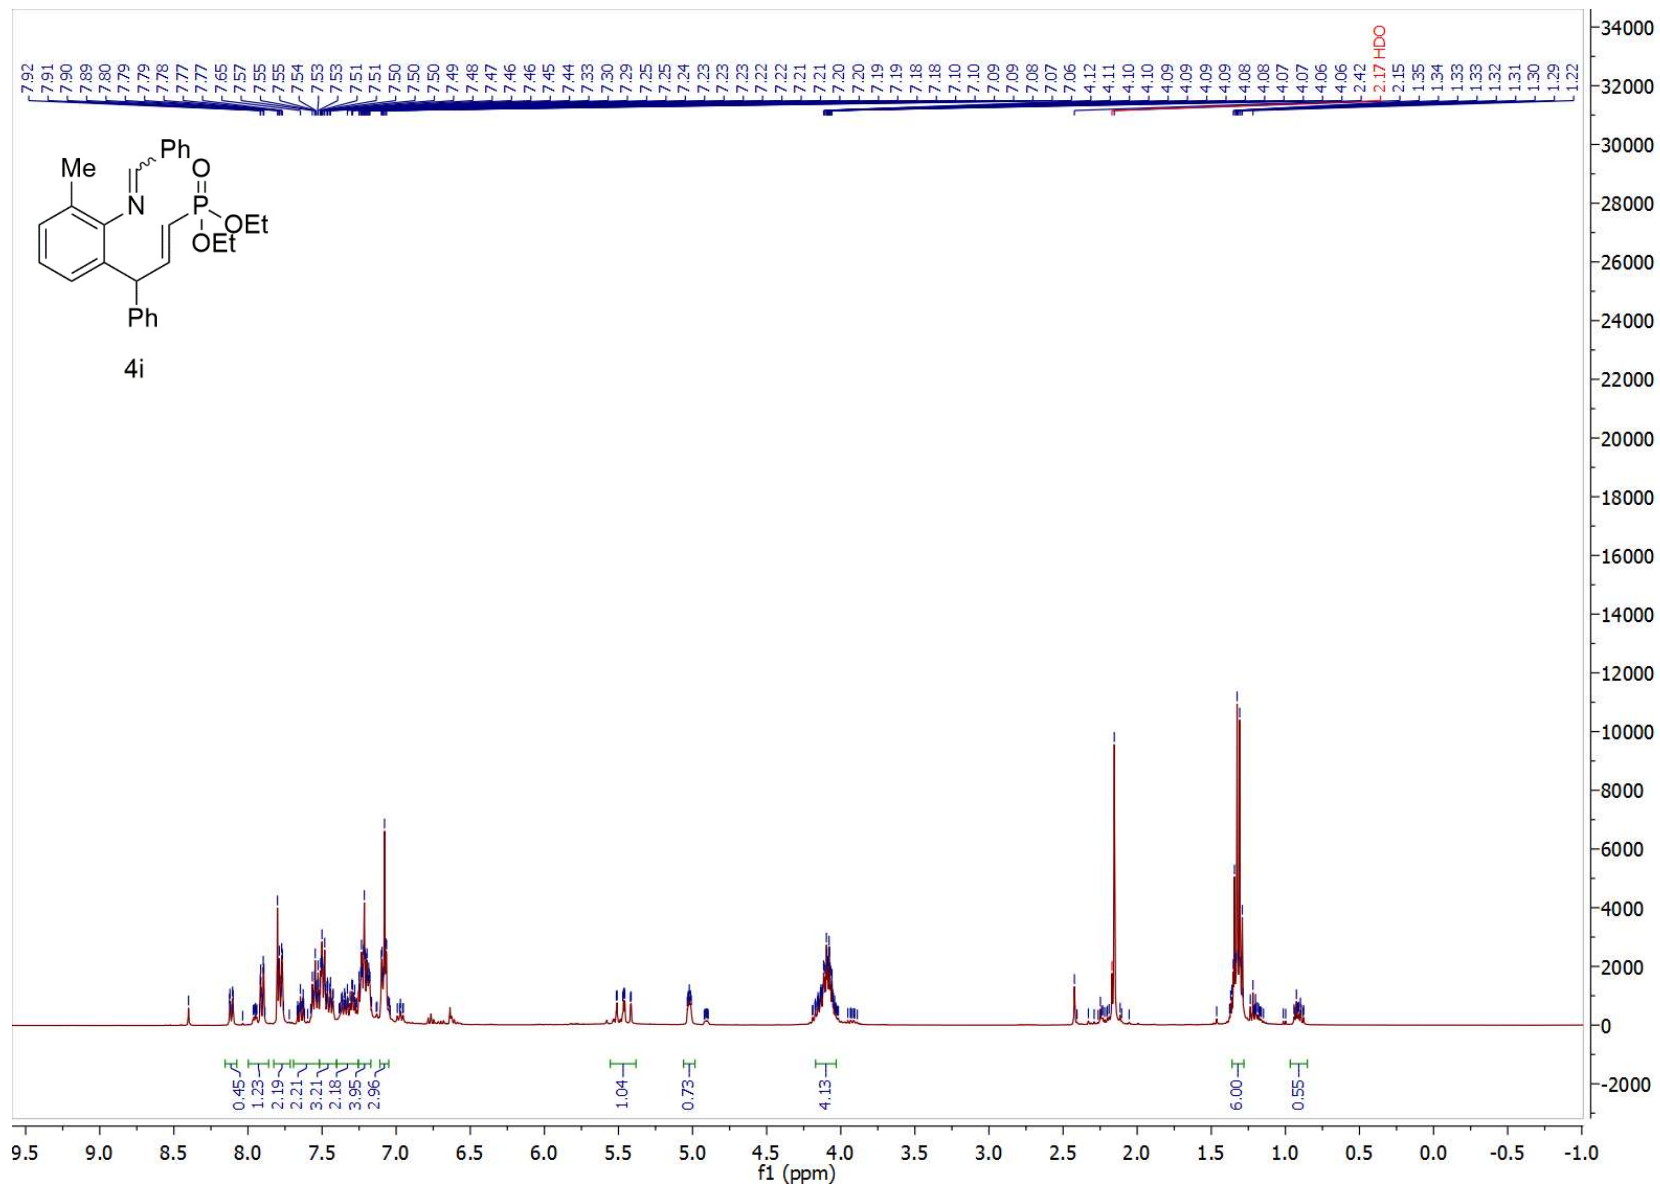

Figure S169: <sup>1</sup>H NMR Spectra of the reaction mixture of 4i

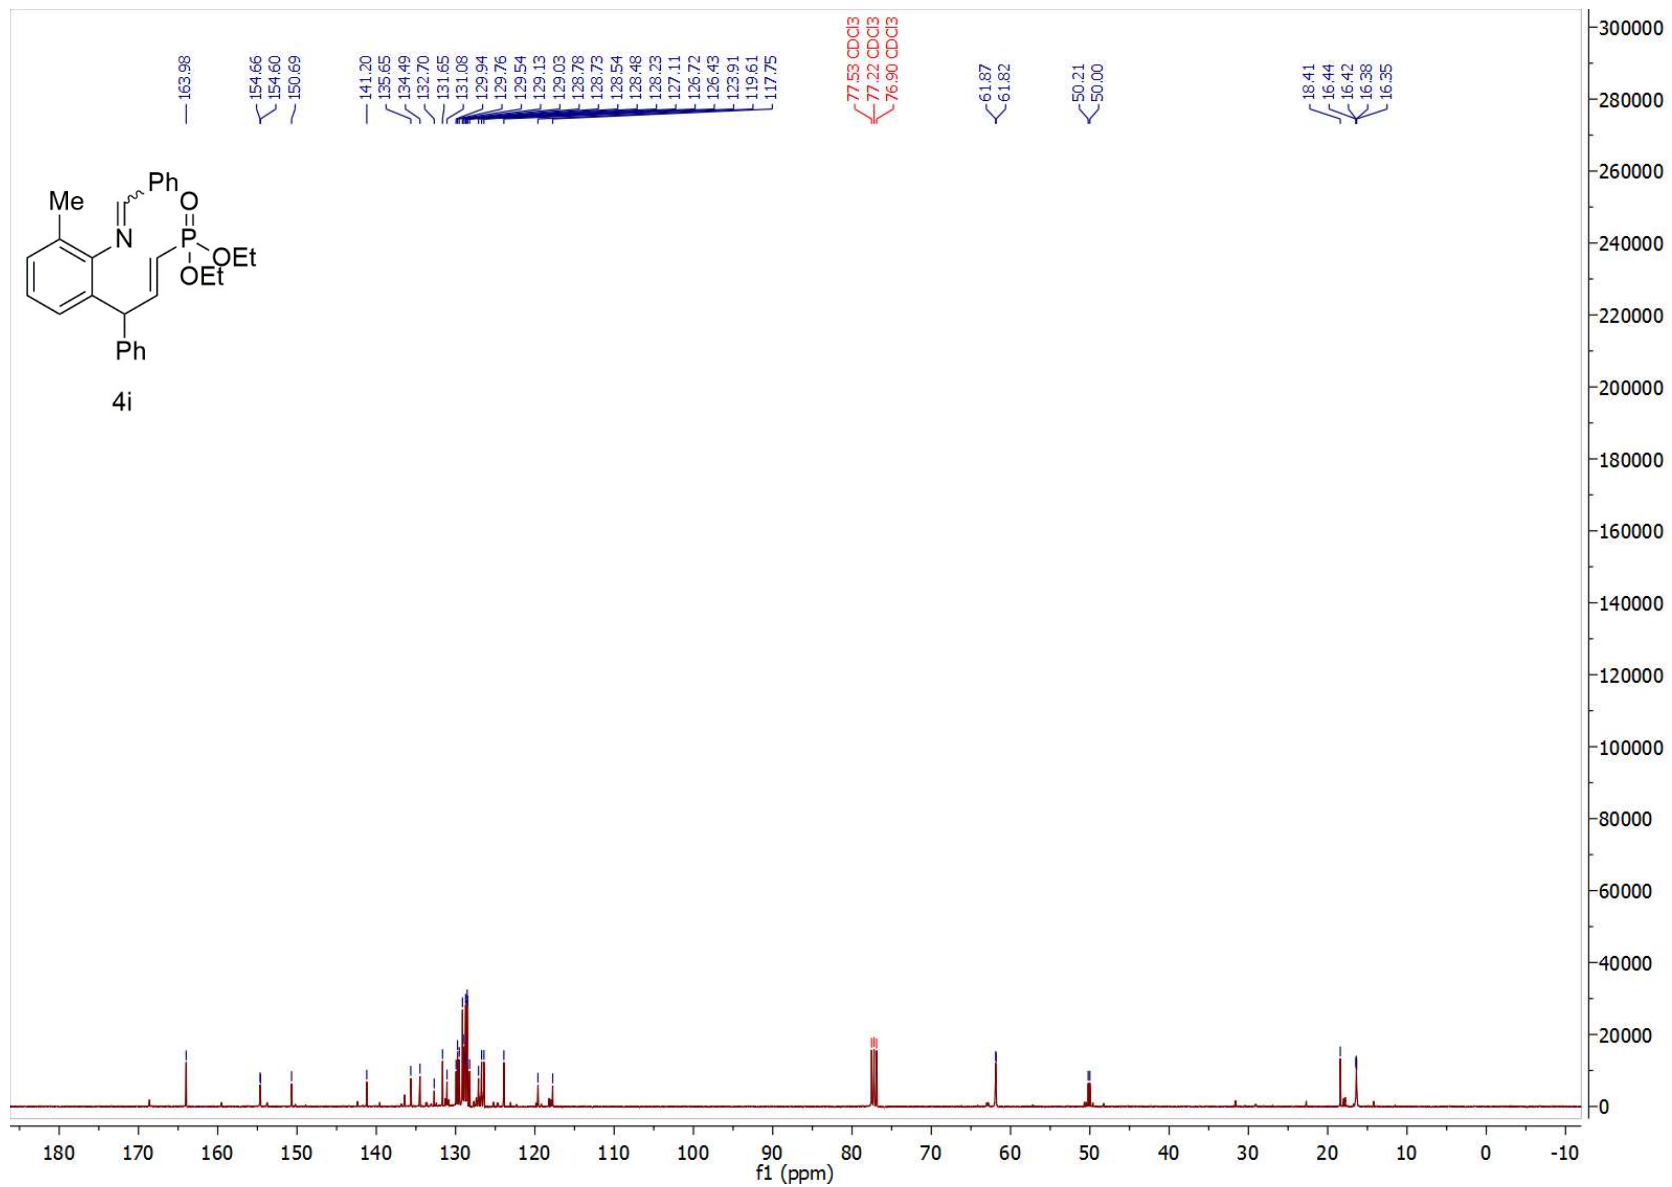

Figure S170: <sup>13</sup>C NMR Spectra of the reaction mixture of 4i

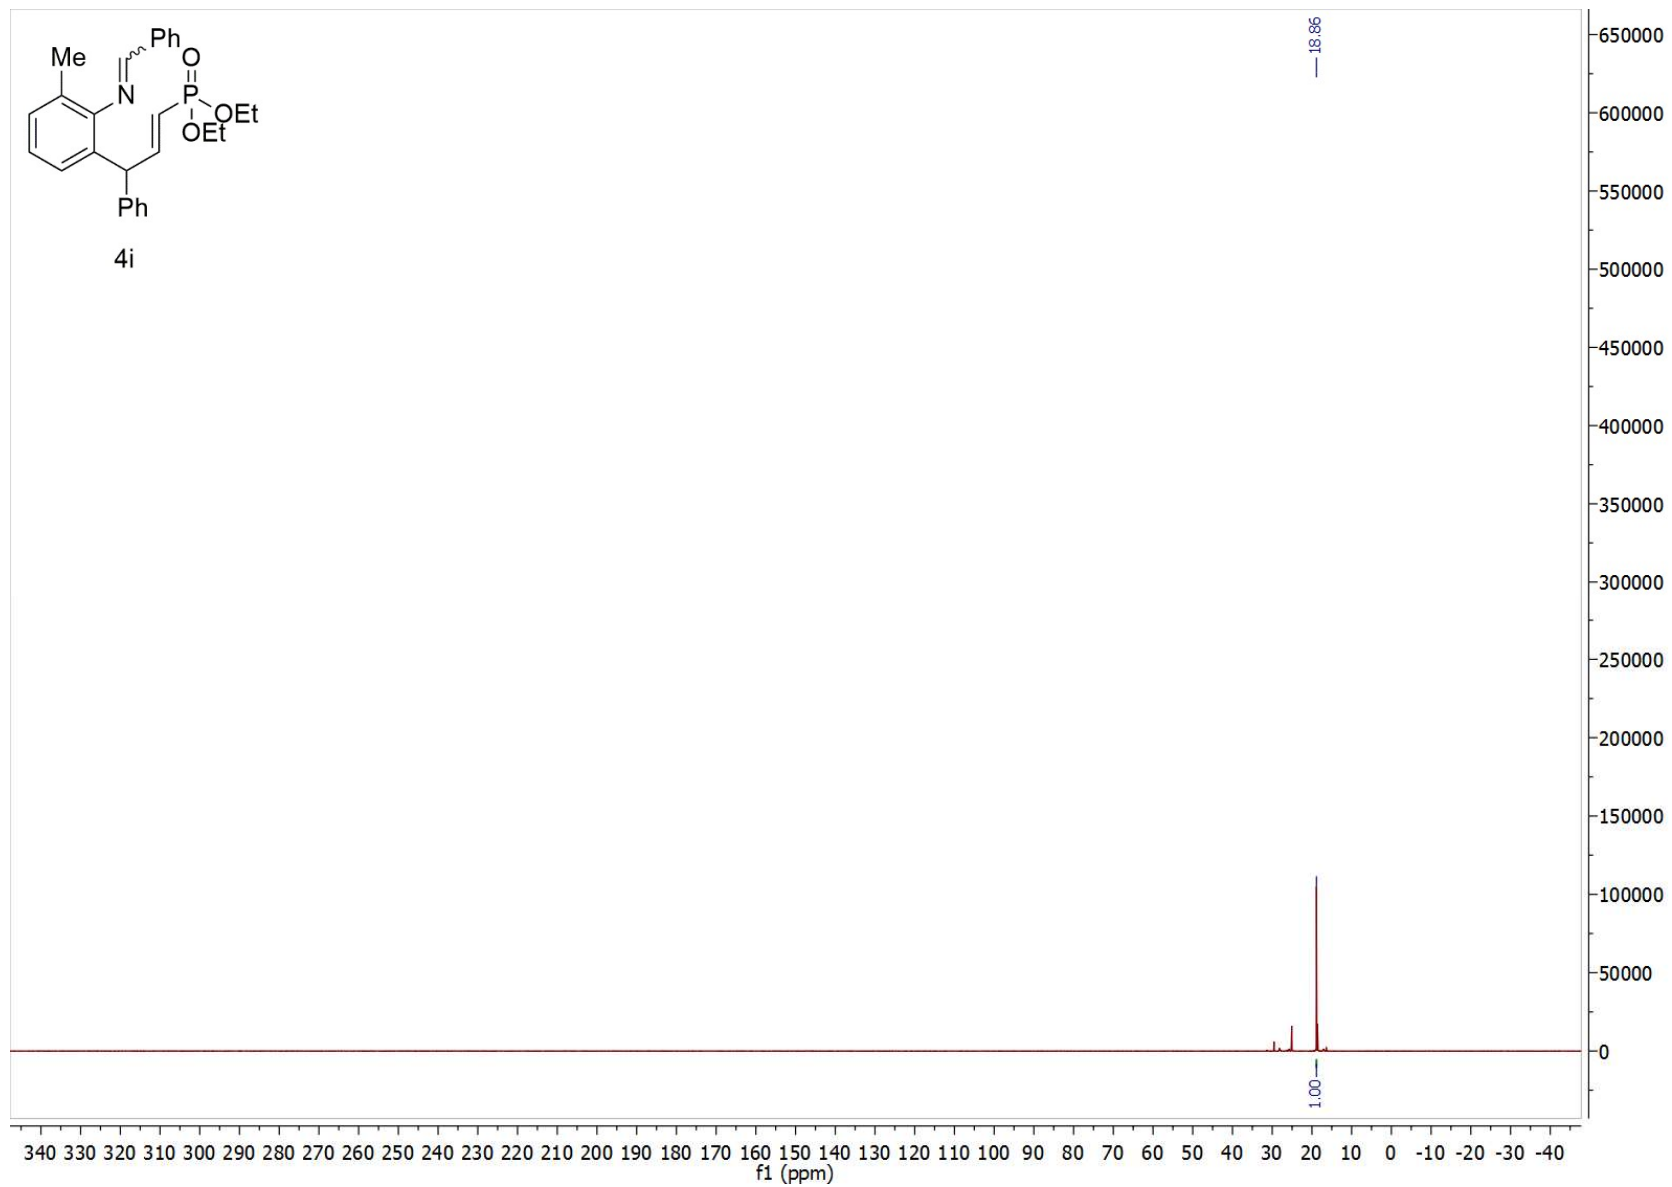

Figure S171: <sup>31</sup>P NMR Spectra of the reaction mixture of 4i

## DFT calculations

All calculations were conducted by using a *Gaussian 09* program package, revision D.01.<sup>[i]</sup> Molecular geometries were optimized with ‘opt=tight’ and ‘int=ultrafine’ keywords and characterized by frequency analysis using a hybrid density functional (M06-2X)<sup>[ii]</sup> with 6-31+G(d,p) basis set as implemented in *Gaussian09*. Polarizable continuum model (PCM) parameters of trifluoroacetic acid are not available, therefore the parameters of acetic acid were applied. Single imaginary frequency was obtained in all transition states, which were supported by the intrinsic reaction coordinate (IRC) calculations using the local quadratic approximation (lqa) algorithm. Each geometry of reaction intermediates was obtained by structural optimization of the IRC geometries. Gibbs free energies  $G$  are calculated at 298 K.

## Geometry and energy of starting material

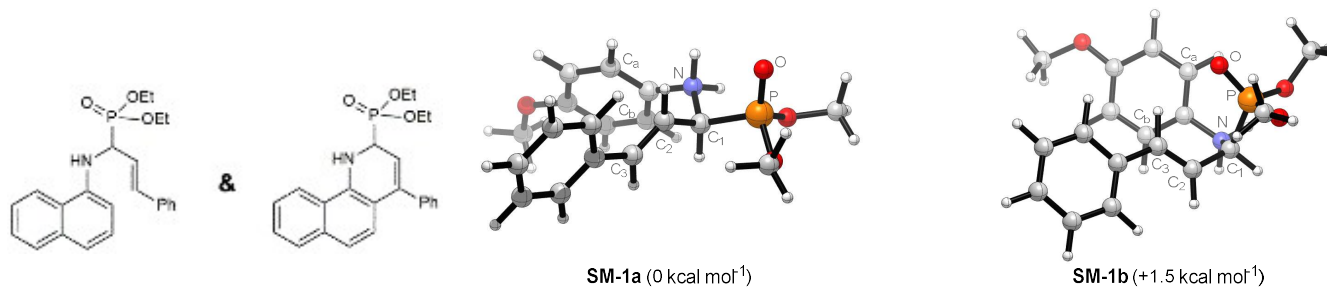

**SM-1a**

**SM-1b**

| Center Number | Atomic Number | Coordinates (Angstroms) |           |           | Center Number | Atomic Number | Coordinates (Angstroms) |          |           |
|---------------|---------------|-------------------------|-----------|-----------|---------------|---------------|-------------------------|----------|-----------|
|               |               | X                       | Y         | Z         |               |               | X                       | Y        | Z         |
| 1             | 6             | 1.177994                | -0.665134 | 0.158974  | 1             | 6             | 1.614953                | 0.603272 | 1.284233  |
| 2             | 1             | 0.944191                | -0.899636 | 1.200823  | 2             | 1             | 2.312335                | 1.052355 | 1.997403  |
| 3             | 6             | 0.648055                | 0.669867  | -0.243427 | 3             | 6             | 0.365405                | 1.422585 | 1.185513  |
| 4             | 1             | 0.892032                | 1.006556  | -1.250213 | 4             | 1             | 0.185735                | 2.104127 | 2.011917  |
| 5             | 6             | -0.047500               | 1.436781  | 0.607263  | 5             | 6             | -0.512667               | 1.291511 | 0.177400  |
| 6             | 1             | -0.287113               | 1.032785  | 1.591170  | 6             | 1             | -0.286500               | 0.585516 | -0.621512 |

|    |   |           |           |           |    |   |           |           |           |
|----|---|-----------|-----------|-----------|----|---|-----------|-----------|-----------|
| 7  | 6 | -0.538750 | 2.795692  | 0.340518  | 7  | 6 | -1.792950 | 1.998440  | 0.036816  |
| 8  | 6 | -1.511410 | 3.337990  | 1.191275  | 8  | 6 | -2.643407 | 1.615834  | -1.009877 |
| 9  | 6 | -0.064485 | 3.570021  | -0.729690 | 9  | 6 | -2.202214 | 3.025741  | 0.901517  |
| 10 | 6 | -2.021380 | 4.614243  | 0.964641  | 10 | 6 | -3.879263 | 2.234424  | -1.186271 |
| 11 | 1 | -1.872716 | 2.750964  | 2.031338  | 11 | 1 | -2.329447 | 0.825608  | -1.687036 |
| 12 | 6 | -0.571430 | 4.845220  | -0.953361 | 12 | 6 | -3.433374 | 3.645586  | 0.722960  |
| 13 | 1 | 0.717285  | 3.185486  | -1.378094 | 13 | 1 | -1.557057 | 3.351497  | 1.711540  |
| 14 | 6 | -1.554200 | 5.369198  | -0.109959 | 14 | 6 | -4.276573 | 3.250455  | -0.319368 |
| 15 | 1 | -2.778399 | 5.019227  | 1.628104  | 15 | 1 | -4.527040 | 1.926192  | -2.000388 |
| 16 | 1 | -0.193623 | 5.437082  | -1.780722 | 16 | 1 | -3.737738 | 4.441538  | 1.394811  |
| 17 | 1 | -1.945317 | 6.366049  | -0.285837 | 17 | 1 | -5.236548 | 3.738043  | -0.455083 |
| 18 | 6 | -0.891482 | -1.917172 | -0.544074 | 18 | 6 | 0.365940  | -1.635748 | 1.154506  |
| 19 | 6 | -1.408758 | -2.685234 | 0.486036  | 19 | 6 | -0.969383 | -1.555912 | 1.518410  |
| 20 | 6 | -1.716205 | -1.219462 | -1.423380 | 20 | 6 | 0.788773  | -2.451373 | 0.106988  |
| 21 | 6 | -2.790515 | -2.774319 | 0.646572  | 21 | 6 | -1.918038 | -2.300836 | 0.821716  |
| 22 | 1 | -0.755575 | -3.225603 | 1.165465  | 22 | 1 | -1.286976 | -0.913833 | 2.334622  |
| 23 | 6 | -3.088338 | -1.306313 | -1.265880 | 23 | 6 | -0.150949 | -3.193329 | -0.586525 |
| 24 | 1 | -1.298032 | -0.615883 | -2.223267 | 24 | 1 | 1.837279  | -2.506703 | -0.170080 |
| 25 | 6 | -3.633321 | -2.081758 | -0.230451 | 25 | 6 | -1.508643 | -3.118195 | -0.238449 |
| 26 | 1 | -3.188742 | -3.382968 | 1.447964  | 26 | 1 | -2.958248 | -2.231797 | 1.112439  |
| 27 | 1 | -3.760479 | -0.780712 | -1.934482 | 27 | 1 | 0.143634  | -3.839082 | -1.405770 |
| 28 | 8 | -4.979054 | -2.101731 | -0.161450 | 28 | 8 | -2.345163 | -3.873017 | -0.978068 |
| 29 | 6 | -5.588886 | -2.873588 | 0.866609  | 29 | 6 | -3.735177 | -3.827548 | -0.677605 |
| 30 | 1 | -5.291974 | -2.507908 | 1.854517  | 30 | 1 | -4.126188 | -2.812619 | -0.800747 |

|    |    |           |           |           |    |    |           |           |           |
|----|----|-----------|-----------|-----------|----|----|-----------|-----------|-----------|
| 31 | 1  | -6.661483 | -2.746448 | 0.736041  | 31 | 1  | -4.214605 | -4.494402 | -1.391187 |
| 32 | 1  | -5.328062 | -3.931586 | 0.764689  | 32 | 1  | -3.924526 | -4.180496 | 0.340866  |
| 33 | 15 | 2.993224  | -0.731081 | -0.106152 | 33 | 15 | 2.576296  | 0.464347  | -0.278478 |
| 34 | 8  | 3.269966  | -2.202957 | 0.431537  | 34 | 8  | 3.673355  | -0.566301 | 0.259910  |
| 35 | 8  | 3.623084  | 0.220261  | 0.994861  | 35 | 8  | 3.342635  | 1.856008  | -0.347031 |
| 36 | 8  | 3.354982  | -0.442734 | -1.514549 | 36 | 8  | 1.849085  | 0.079100  | -1.507884 |
| 37 | 6  | 4.605123  | -2.759490 | 0.355735  | 37 | 6  | 4.731167  | -1.007514 | -0.624733 |
| 38 | 1  | 4.517993  | -3.792695 | 0.682605  | 38 | 1  | 5.291527  | -1.758647 | -0.073320 |
| 39 | 1  | 4.966510  | -2.714801 | -0.672640 | 39 | 1  | 4.299685  | -1.440505 | -1.528757 |
| 40 | 1  | 5.266848  | -2.206376 | 1.023782  | 40 | 1  | 5.374229  | -0.161203 | -0.870946 |
| 41 | 6  | 4.000468  | 1.579153  | 0.665827  | 41 | 6  | 2.935505  | 2.871413  | -1.294152 |
| 42 | 1  | 3.103463  | 2.193670  | 0.564767  | 42 | 1  | 2.007838  | 3.336603  | -0.955834 |
| 43 | 1  | 4.604086  | 1.928034  | 1.500424  | 43 | 1  | 3.740994  | 3.602169  | -1.308602 |
| 44 | 1  | 4.579328  | 1.590352  | -0.257745 | 44 | 1  | 2.800861  | 2.428392  | -2.280806 |
| 45 | 1  | 1.027333  | -2.672368 | -0.412067 | 45 | 1  | 1.057218  | -0.685401 | 2.834834  |
| 46 | 1  | 0.814653  | -1.635682 | -1.665119 | 46 | 1  | 2.257761  | -1.293521 | 1.892533  |
| 47 | 7  | 0.568846  | -1.790356 | -0.678457 | 47 | 7  | 1.352789  | -0.804230 | 1.859756  |

E(RM062X) = -1396.19932694

Zero-point correction= 0.392871 (Hartree/Particle)

Sum of electronic and thermal Energies= -1395.781725

Sum of electronic and thermal Enthalpies= -1395.780781

Sum of electronic and thermal Free Energies= -1395.864841

E(RM062X) = -1396.19714601

Zero-point correction= 0.392763 (Hartree/Particle)

Sum of electronic and thermal Energies= -1395.779710

Sum of electronic and thermal Enthalpies= -1395.778765

Sum of electronic and thermal Free Energies= -1395.862432

## Geometry and energy for a reaction path to give (*E*)-product

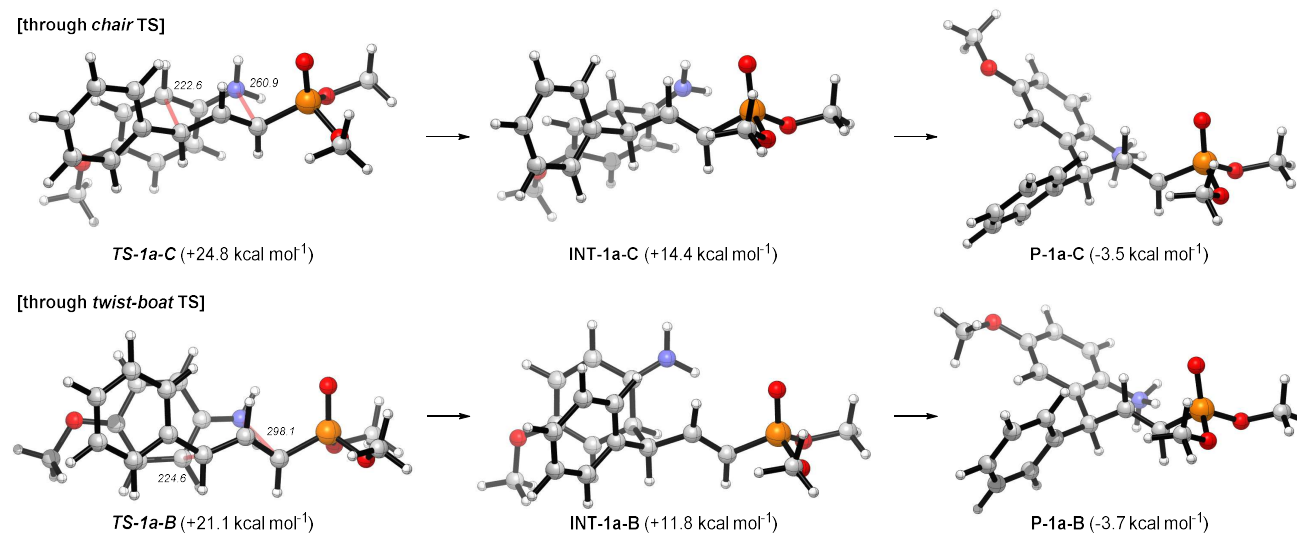

**Figure S1.** Reaction profiles for step 1. Free energy differences are shown in kcal mol<sup>-1</sup>. Interatomic distances are shown in pm.

| <i>TS-1a-C</i> |        |                         |           |           | <i>TS-1a-B</i> |        |                         |          |           |
|----------------|--------|-------------------------|-----------|-----------|----------------|--------|-------------------------|----------|-----------|
| Center         | Atomic | Coordinates (Angstroms) |           |           | Center         | Atomic | Coordinates (Angstroms) |          |           |
| Number         | Number | X                       | Y         | Z         | Number         | Number | X                       | Y        | Z         |
| 1              | 6      | 1.726616                | 0.003826  | 0.467168  | 1              | 6      | -1.990552               | 0.359834 | -0.841747 |
| 2              | 1      | 1.476025                | -0.764496 | 1.196385  | 2              | 1      | -1.996738               | 0.090573 | -1.897065 |
| 3              | 6      | 0.785782                | 0.853714  | -0.007324 | 3              | 6      | -0.859037               | 0.715229 | -0.207492 |
| 4              | 1      | 1.084123                | 1.636888  | -0.700830 | 4              | 1      | -0.915007               | 0.955175 | 0.852841  |
| 5              | 6      | -0.599322               | 0.676495  | 0.313621  | 5              | 6      | 0.434517                | 0.681762 | -0.851890 |
| 6              | 1      | -0.817110               | -0.007371 | 1.133662  | 6              | 1      | 0.411887                | 0.646033 | -1.939516 |
| 7              | 6      | -1.596120               | 1.722090  | 0.095629  | 7              | 6      | 1.611160                | 1.304880 | -0.280897 |



|    |   |           |           |           |    |   |          |           |           |
|----|---|-----------|-----------|-----------|----|---|----------|-----------|-----------|
| 8  | 6 | -2.737642 | 1.732451  | 0.913848  | 8  | 6 | 2.680294 | 1.632032  | -1.139888 |
| 9  | 6 | -1.458426 | 2.698008  | -0.905771 | 9  | 6 | 1.749684 | 1.562114  | 1.096998  |
| 10 | 6 | -3.714191 | 2.708008  | 0.748414  | 10 | 6 | 3.837715 | 2.214542  | -0.644303 |
| 11 | 1 | -2.850439 | 0.972508  | 1.682588  | 11 | 1 | 2.584893 | 1.432415  | -2.204404 |
| 12 | 6 | -2.440698 | 3.666053  | -1.074398 | 12 | 6 | 2.911612 | 2.145397  | 1.590980  |
| 13 | 1 | -0.595834 | 2.694181  | -1.565222 | 13 | 1 | 0.954724 | 1.302755  | 1.788322  |
| 14 | 6 | -3.567490 | 3.674296  | -0.247625 | 14 | 6 | 3.956347 | 2.468678  | 0.725041  |
| 15 | 1 | -4.588500 | 2.713488  | 1.390331  | 15 | 1 | 4.648719 | 2.469802  | -1.318350 |
| 16 | 1 | -2.331540 | 4.414497  | -1.851911 | 16 | 1 | 3.004317 | 2.341597  | 2.653651  |
| 17 | 1 | -4.330938 | 4.433492  | -0.382754 | 17 | 1 | 4.862629 | 2.920175  | 1.115346  |
| 18 | 6 | -0.347817 | -1.846445 | -0.761366 | 18 | 6 | 0.311752 | -1.817489 | 0.312482  |
| 19 | 6 | -0.853952 | -2.752263 | 0.211449  | 19 | 6 | 0.918752 | -1.509602 | -0.948684 |
| 20 | 6 | -1.207691 | -0.806184 | -1.230755 | 20 | 6 | 1.114396 | -1.704510 | 1.487094  |
| 21 | 6 | -2.181103 | -2.726233 | 0.552488  | 21 | 6 | 2.334069 | -1.479701 | -1.065002 |
| 22 | 1 | -0.191044 | -3.490984 | 0.650431  | 22 | 1 | 0.327004 | -1.681228 | -1.843344 |
| 23 | 6 | -2.599651 | -0.884478 | -0.961357 | 23 | 6 | 2.454053 | -1.486831 | 1.363087  |
| 24 | 1 | -0.874963 | -0.192300 | -2.063002 | 24 | 1 | 0.658109 | -1.824226 | 2.464233  |
| 25 | 6 | -3.083628 | -1.799929 | -0.058921 | 25 | 6 | 3.092103 | -1.405687 | 0.078454  |
| 26 | 1 | -2.543135 | -3.437899 | 1.285268  | 26 | 1 | 2.773222 | -1.401993 | -2.051601 |
| 27 | 1 | -3.277612 | -0.167154 | -1.410779 | 27 | 1 | 3.085734 | -1.402613 | 2.242009  |
| 28 | 8 | -4.408104 | -1.772790 | 0.208196  | 28 | 8 | 4.428190 | -1.268466 | 0.133505  |
| 29 | 6 | -4.959645 | -2.787247 | 1.040835  | 29 | 6 | 5.130418 | -1.212240 | -1.102503 |
| 30 | 1 | -4.560545 | -2.721607 | 2.057608  | 30 | 1 | 4.796599 | -0.353113 | -1.694450 |
| 31 | 1 | -6.031366 | -2.600339 | 1.060662  | 31 | 1 | 6.181223 | -1.097946 | -0.845322 |

|                                                            |    |           |           |           |                                                           |    |           |           |           |
|------------------------------------------------------------|----|-----------|-----------|-----------|-----------------------------------------------------------|----|-----------|-----------|-----------|
| 32                                                         | 1  | -4.769030 | -3.781373 | 0.624709  | 32                                                        | 1  | 4.982807  | -2.137242 | -1.669165 |
| 33                                                         | 15 | 3.453127  | 0.192396  | 0.007851  | 33                                                        | 15 | -3.525405 | 0.225802  | 0.068729  |
| 34                                                         | 8  | 3.833201  | -1.318571 | -0.342618 | 34                                                        | 8  | -3.920638 | -1.288895 | -0.262840 |
| 35                                                         | 8  | 4.274701  | 0.420465  | 1.362283  | 35                                                        | 8  | -4.646847 | 1.028163  | -0.745915 |
| 36                                                         | 8  | 3.677280  | 1.219115  | -1.038539 | 36                                                        | 8  | -3.411797 | 0.600321  | 1.500585  |
| 37                                                         | 6  | 5.209762  | -1.635457 | -0.646608 | 37                                                        | 6  | -5.215155 | -1.780472 | 0.146150  |
| 38                                                         | 1  | 5.221321  | -2.683625 | -0.937141 | 38                                                        | 1  | -5.222468 | -2.843482 | -0.085140 |
| 39                                                         | 1  | 5.563644  | -1.013915 | -1.471338 | 39                                                        | 1  | -5.352581 | -1.629729 | 1.218850  |
| 40                                                         | 1  | 5.826471  | -1.482617 | 0.240509  | 40                                                        | 1  | -5.997200 | -1.266655 | -0.415101 |
| 41                                                         | 6  | 4.459401  | 1.762998  | 1.852012  | 41                                                        | 6  | -4.834992 | 2.429534  | -0.471644 |
| 42                                                         | 1  | 3.498198  | 2.190314  | 2.149259  | 42                                                        | 1  | -3.934981 | 2.990642  | -0.737386 |
| 43                                                         | 1  | 5.110647  | 1.680671  | 2.719634  | 43                                                        | 1  | -5.666954 | 2.750679  | -1.094959 |
| 44                                                         | 1  | 4.925188  | 2.380916  | 1.083417  | 44                                                        | 1  | -5.070977 | 2.575734  | 0.583196  |
| 45                                                         | 1  | 1.559921  | -2.616784 | -0.801306 | 45                                                        | 1  | -1.541563 | -2.318564 | -0.431036 |
| 46                                                         | 1  | 1.255437  | -1.383706 | -1.954602 | 46                                                        | 1  | -1.426905 | -2.288719 | 1.286102  |
| 47                                                         | 7  | 0.937238  | -1.893175 | -1.140215 | 47                                                        | 7  | -0.974483 | -2.157322 | 0.390603  |
| E(RM062X) = -1396.15735540                                 |    |           |           |           | E(RM062X) = -1396.16414796                                |    |           |           |           |
| Zero-point correction = 0.388789 (Hartree/Particle)        |    |           |           |           | Zero-point correction= 0.389129 (Hartree/Particle)        |    |           |           |           |
| Sum of electronic and thermal Energies= -1395.743894       |    |           |           |           | Sum of electronic and thermal Energies= -1395.750500      |    |           |           |           |
| Sum of electronic and thermal Enthalpies = -1395.742950    |    |           |           |           | Sum of electronic and thermal Enthalpies= -1395.749556    |    |           |           |           |
| Sum of electronic and thermal Free Energies = -1395.825251 |    |           |           |           | Sum of electronic and thermal Free Energies= -1395.831232 |    |           |           |           |

INT-1a-C

INT-1a-B

| Center<br>Number | Atomic<br>Number | Coordinates (Angstroms) |           |           | Center<br>Number | Atomic<br>Number | Coordinates (Angstroms) |           |           |
|------------------|------------------|-------------------------|-----------|-----------|------------------|------------------|-------------------------|-----------|-----------|
|                  |                  | X                       | Y         | Z         |                  |                  | X                       | Y         | Z         |
| 1                | 6                | 1.749854                | -0.305070 | 0.530293  | 1                | 6                | -2.054174               | -0.246434 | -0.822207 |
| 2                | 1                | 1.487200                | -0.724159 | 1.499902  | 2                | 1                | -1.973524               | -0.575062 | -1.856878 |
| 3                | 6                | 0.836431                | 0.234869  | -0.279652 | 3                | 6                | -0.985458               | 0.089004  | -0.094430 |
| 4                | 1                | 1.161546                | 0.648685  | -1.236477 | 4                | 1                | -1.146979               | 0.427249  | 0.928545  |
| 5                | 6                | -0.626758               | 0.323284  | 0.046204  | 5                | 6                | 0.429288                | 0.014881  | -0.603674 |
| 6                | 1                | -0.796676               | -0.054971 | 1.059995  | 6                | 1                | 0.395948                | -0.011785 | -1.697266 |
| 7                | 6                | -1.105588               | 1.763262  | -0.027555 | 7                | 6                | 1.278982                | 1.196729  | -0.175873 |
| 8                | 6                | -1.676734               | 2.359109  | 1.098679  | 8                | 6                | 2.108153                | 1.817243  | -1.115681 |
| 9                | 6                | -0.990067               | 2.503614  | -1.208767 | 9                | 6                | 1.274363                | 1.676918  | 1.138338  |
| 10               | 6                | -2.126412               | 3.678234  | 1.047993  | 10               | 6                | 2.924009                | 2.886527  | -0.751983 |
| 11               | 1                | -1.775193               | 1.787265  | 2.017671  | 11               | 1                | 2.115311                | 1.458806  | -2.142168 |
| 12               | 6                | -1.441856               | 3.820431  | -1.260913 | 12               | 6                | 2.089325                | 2.746741  | 1.505487  |
| 13               | 1                | -0.548853               | 2.060404  | -2.098522 | 13               | 1                | 0.635629                | 1.224664  | 1.893446  |
| 14               | 6                | -2.010676               | 4.410952  | -0.131954 | 14               | 6                | 2.917340                | 3.352908  | 0.562085  |
| 15               | 1                | -2.569038               | 4.130056  | 1.929782  | 15               | 1                | 3.560330                | 3.356119  | -1.495063 |
| 16               | 1                | -1.348017               | 4.384878  | -2.182912 | 16               | 1                | 2.072676                | 3.107585  | 2.528765  |
| 17               | 1                | -2.361984               | 5.436713  | -0.173353 | 17               | 1                | 3.549383                | 4.187300  | 0.848064  |
| 18               | 6                | -1.049475               | -2.002324 | -0.816428 | 18               | 6                | 1.156470                | -1.574483 | 1.249097  |
| 19               | 6                | -1.770319               | -2.909097 | 0.022682  | 19               | 6                | 1.108052                | -1.392785 | -0.234165 |
| 20               | 6                | -1.509945               | -0.585946 | -0.936980 | 20               | 6                | 2.387364                | -1.390936 | 1.956683  |
| 21               | 6                | -3.007854               | -2.567039 | 0.466023  | 21               | 6                | 2.439778                | -1.453523 | -0.909867 |
| 22               | 1                | -1.345649               | -3.880261 | 0.251687  | 22               | 1                | 0.439016                | -2.151000 | -0.656652 |

|    |    |           |           |           |    |    |           |           |           |
|----|----|-----------|-----------|-----------|----|----|-----------|-----------|-----------|
| 23 | 6  | -2.943250 | -0.383554 | -0.573598 | 23 | 6  | 3.538152  | -1.290678 | 1.249727  |
| 24 | 1  | -1.322388 | -0.225069 | -1.955244 | 24 | 1  | 2.388098  | -1.381974 | 3.041377  |
| 25 | 6  | -3.640121 | -1.304996 | 0.121148  | 25 | 6  | 3.582265  | -1.362014 | -0.202189 |
| 26 | 1  | -3.545555 | -3.278089 | 1.084348  | 26 | 1  | 2.427544  | -1.478136 | -1.993306 |
| 27 | 1  | -3.390751 | 0.578611  | -0.797634 | 27 | 1  | 4.487753  | -1.174874 | 1.764320  |
| 28 | 8  | -4.902355 | -1.011933 | 0.517168  | 28 | 8  | 4.839179  | -1.325706 | -0.688293 |
| 29 | 6  | -5.762835 | -2.076249 | 0.916420  | 29 | 6  | 4.977241  | -1.350434 | -2.103434 |
| 30 | 1  | -5.471684 | -2.476362 | 1.892029  | 30 | 1  | 4.474259  | -0.486559 | -2.551213 |
| 31 | 1  | -6.755246 | -1.636524 | 0.993978  | 31 | 1  | 6.045394  | -1.303137 | -2.303106 |
| 32 | 1  | -5.776094 | -2.874006 | 0.167156  | 32 | 1  | 4.561987  | -2.277065 | -2.513077 |
| 33 | 15 | 3.467859  | -0.329005 | 0.030500  | 33 | 15 | -3.684486 | -0.117566 | -0.092191 |
| 34 | 8  | 3.904684  | -1.806305 | 0.446577  | 34 | 8  | -4.374884 | -1.463403 | -0.595748 |
| 35 | 8  | 4.287422  | 0.548230  | 1.096219  | 35 | 8  | -4.496319 | 0.983602  | -0.932231 |
| 36 | 8  | 3.685196  | 0.073979  | -1.383155 | 36 | 8  | -3.662276 | 0.133522  | 1.372474  |
| 37 | 6  | 5.287091  | -2.189819 | 0.300489  | 37 | 6  | -5.762870 | -1.694930 | -0.280300 |
| 38 | 1  | 5.337353  | -3.246388 | 0.555113  | 38 | 1  | -5.993237 | -2.694309 | -0.643200 |
| 39 | 1  | 5.613347  | -2.037539 | -0.730407 | 39 | 1  | -5.916739 | -1.643990 | 0.799534  |
| 40 | 1  | 5.906127  | -1.608062 | 0.985807  | 40 | 1  | -6.385663 | -0.956926 | -0.789105 |
| 41 | 6  | 4.361362  | 1.971567  | 0.901361  | 41 | 6  | -4.363649 | 2.366765  | -0.560586 |
| 42 | 1  | 3.362272  | 2.413734  | 0.957012  | 42 | 1  | -3.325689 | 2.692641  | -0.675275 |
| 43 | 1  | 4.979214  | 2.357930  | 1.709591  | 43 | 1  | -5.001658 | 2.927238  | -1.241024 |
| 44 | 1  | 4.816731  | 2.194663  | -0.064708 | 44 | 1  | -4.689172 | 2.510767  | 0.470713  |
| 45 | 1  | 0.407006  | -3.327687 | -1.303919 | 45 | 1  | -0.818752 | -2.036447 | 1.413027  |
| 46 | 1  | 0.559900  | -1.777541 | -2.045093 | 46 | 1  | 0.046381  | -1.944322 | 2.907492  |

|                                                            |   |          |           |           |                                                            |   |          |           |          |
|------------------------------------------------------------|---|----------|-----------|-----------|------------------------------------------------------------|---|----------|-----------|----------|
| 47                                                         | 7 | 0.037362 | -2.391073 | -1.429439 | 47                                                         | 7 | 0.057966 | -1.866976 | 1.895860 |
| E(RM062X) = -1396.17467136                                 |   |          |           |           | E(RM062X) = -1396.18152765                                 |   |          |           |          |
| Zero-point correction = 0.390637 (Hartree/Particle)        |   |          |           |           | Zero-point correction = 0.391995 (Hartree/Particle)        |   |          |           |          |
| Sum of electronic and thermal Energies = -1395.759075      |   |          |           |           | Sum of electronic and thermal Energies = -1395.764981      |   |          |           |          |
| Sum of electronic and thermal Enthalpies = -1395.758131    |   |          |           |           | Sum of electronic and thermal Enthalpies = -1395.764037    |   |          |           |          |
| Sum of electronic and thermal Free Energies = -1395.841952 |   |          |           |           | Sum of electronic and thermal Free Energies = -1395.846101 |   |          |           |          |

| P-1a-C |        |                         |           |           | P-1a-B |        |                         |           |           |
|--------|--------|-------------------------|-----------|-----------|--------|--------|-------------------------|-----------|-----------|
| Center | Atomic | Coordinates (Angstroms) |           |           | Center | Atomic | Coordinates (Angstroms) |           |           |
| Number | Number | X                       | Y         | Z         | Number | Number | X                       | Y         | Z         |
| 1      | 6      | 1.993237                | -0.085281 | 0.670756  | 1      | 6      | -2.005823               | -0.197091 | -0.453460 |
| 2      | 1      | 2.155324                | 0.100750  | 1.732656  | 2      | 1      | -2.248546               | -0.034940 | -1.503335 |
| 3      | 6      | 0.788702                | 0.046795  | 0.104827  | 3      | 6      | -0.751928               | -0.105684 | 0.002764  |
| 4      | 1      | 0.685317                | -0.134937 | -0.965744 | 4      | 1      | -0.564541               | -0.262762 | 1.065637  |
| 5      | 6      | -0.470228               | 0.406530  | 0.861430  | 5      | 6      | 0.447136                | 0.194338  | -0.871367 |
| 6      | 1      | -0.249964               | 0.348334  | 1.936269  | 6      | 1      | 0.135674                | 0.094110  | -1.919987 |
| 7      | 6      | -0.925042               | 1.835097  | 0.592827  | 7      | 6      | 0.916919                | 1.632590  | -0.698818 |
| 8      | 6      | -1.768396               | 2.451673  | 1.522972  | 8      | 6      | 1.459424                | 2.303234  | -1.798103 |
| 9      | 6      | -0.553506               | 2.534834  | -0.556708 | 9      | 6      | 0.856199                | 2.286288  | 0.535641  |
| 10     | 6      | -2.237417               | 3.744284  | 1.306712  | 10     | 6      | 1.938015                | 3.605731  | -1.668068 |
| 11     | 1      | -2.062240               | 1.912155  | 2.420313  | 11     | 1      | 1.511179                | 1.801654  | -2.761271 |
| 12     | 6      | -1.023541               | 3.831474  | -0.774495 | 12     | 6      | 1.334307                | 3.589918  | 0.666478  |
| 13     | 1      | 0.103755                | 2.080559  | -1.292119 | 13     | 1      | 0.443403                | 1.783571  | 1.405634  |

|    |    |           |           |           |    |    |           |           |           |
|----|----|-----------|-----------|-----------|----|----|-----------|-----------|-----------|
| 14 | 6  | -1.865957 | 4.438139  | 0.153788  | 14 | 6  | 1.876814  | 4.252286  | -0.433860 |
| 15 | 1  | -2.889649 | 4.210666  | 2.038037  | 15 | 1  | 2.354657  | 4.115208  | -2.530954 |
| 16 | 1  | -0.727355 | 4.364371  | -1.672303 | 16 | 1  | 1.281167  | 4.086239  | 1.630098  |
| 17 | 1  | -2.229419 | 5.446299  | -0.016389 | 17 | 1  | 2.246522  | 5.267254  | -0.330970 |
| 18 | 6  | -1.425928 | -1.956200 | 0.974378  | 18 | 6  | 1.369215  | -2.183630 | -0.890038 |
| 19 | 6  | -2.361291 | -2.928036 | 0.667613  | 19 | 6  | 1.549843  | -0.832545 | -0.591572 |
| 20 | 6  | -1.547505 | -0.629916 | 0.532910  | 20 | 6  | 2.337642  | -3.143768 | -0.614796 |
| 21 | 6  | -3.468801 | -2.604534 | -0.112781 | 21 | 6  | 2.757001  | -0.461330 | 0.005047  |
| 22 | 1  | -2.244221 | -3.944307 | 1.032418  | 22 | 1  | 0.107000  | -2.416238 | -2.547541 |
| 23 | 6  | -2.651058 | -0.321520 | -0.248082 | 23 | 6  | 3.528758  | -2.762334 | -0.024018 |
| 24 | 1  | 0.620598  | -2.035641 | 1.386843  | 24 | 1  | 2.166271  | -4.188269 | -0.858267 |
| 25 | 6  | -3.610516 | -1.293343 | -0.573852 | 25 | 6  | 3.742612  | -1.413504 | 0.286943  |
| 26 | 1  | -4.194973 | -3.372246 | -0.345761 | 26 | 1  | 2.919542  | 0.582102  | 0.241039  |
| 27 | 1  | -2.797977 | 0.687318  | -0.618719 | 27 | 1  | 4.300707  | -3.488374 | 0.202765  |
| 28 | 8  | -4.634817 | -0.863265 | -1.335159 | 28 | 8  | 4.926981  | -1.119424 | 0.857375  |
| 29 | 6  | -5.644196 | -1.800508 | -1.693329 | 29 | 6  | 5.197462  | 0.237398  | 1.193220  |
| 30 | 1  | -6.139041 | -2.196750 | -0.801213 | 30 | 1  | 4.468683  | 0.610940  | 1.919367  |
| 31 | 1  | -6.361740 | -1.247514 | -2.295700 | 31 | 1  | 6.191072  | 0.239402  | 1.636325  |
| 32 | 1  | -5.221287 | -2.619709 | -2.282963 | 32 | 1  | 5.191015  | 0.867837  | 0.298497  |
| 33 | 15 | 3.414499  | -0.469439 | -0.349756 | 33 | 15 | -3.349365 | -0.472721 | 0.699341  |
| 34 | 8  | 4.158825  | -1.576913 | 0.524424  | 34 | 8  | -4.249056 | -1.525535 | -0.090574 |
| 35 | 8  | 4.421316  | 0.772449  | -0.207980 | 35 | 8  | -4.273944 | 0.837857  | 0.641296  |
| 36 | 8  | 3.071572  | -0.819362 | -1.751054 | 36 | 8  | -2.900694 | -0.839623 | 2.066160  |
| 37 | 6  | 5.426229  | -2.088667 | 0.062246  | 37 | 6  | -5.509527 | -1.932271 | 0.481754  |

|    |   |           |           |           |    |   |           |           |           |
|----|---|-----------|-----------|-----------|----|---|-----------|-----------|-----------|
| 38 | 1 | 5.703116  | -2.881970 | 0.753278  | 38 | 1 | -5.902510 | -2.708278 | -0.171606 |
| 39 | 1 | 5.323144  | -2.490493 | -0.947665 | 39 | 1 | -5.354661 | -2.331211 | 1.486186  |
| 40 | 1 | 6.174549  | -1.294315 | 0.082558  | 40 | 1 | -6.193377 | -1.082054 | 0.509821  |
| 41 | 6 | 4.210898  | 1.915780  | -1.055834 | 41 | 6 | -3.928556 | 1.956388  | 1.477851  |
| 42 | 1 | 3.220933  | 2.345570  | -0.873340 | 42 | 1 | -2.941139 | 2.342733  | 1.206755  |
| 43 | 1 | 4.979348  | 2.638687  | -0.789503 | 43 | 1 | -4.683196 | 2.718451  | 1.293918  |
| 44 | 1 | 4.306359  | 1.627480  | -2.103699 | 44 | 1 | -3.938505 | 1.656852  | 2.526850  |
| 45 | 1 | -0.317422 | -1.940462 | 2.754495  | 45 | 1 | -0.711265 | -2.204530 | -1.116215 |
| 46 | 1 | -0.220122 | -3.357135 | 1.915593  | 46 | 1 | 0.015181  | -3.648618 | -1.459805 |
| 47 | 7 | -0.269058 | -2.339146 | 1.809350  | 47 | 7 | 0.122515  | -2.633022 | -1.544500 |

E(RM062X) = -1396.20642113

Zero-point correction = 0.393160 (Hartree/Particle)

Sum of electronic and thermal Energies = -1395.788439

Sum of electronic and thermal Enthalpies = -1395.787494

Sum of electronic and thermal Free Energies = -1395.870391

E(RM062X) = -1396.20633956

Zero-point correction = 0.393542 (Hartree/Particle)

Sum of electronic and thermal Energies = -1395.787979

Sum of electronic and thermal Enthalpies = -1395.787035

Sum of electronic and thermal Free Energies = -1395.870764

### X.3.Geometry and energy for a reaction path to give (Z)-product

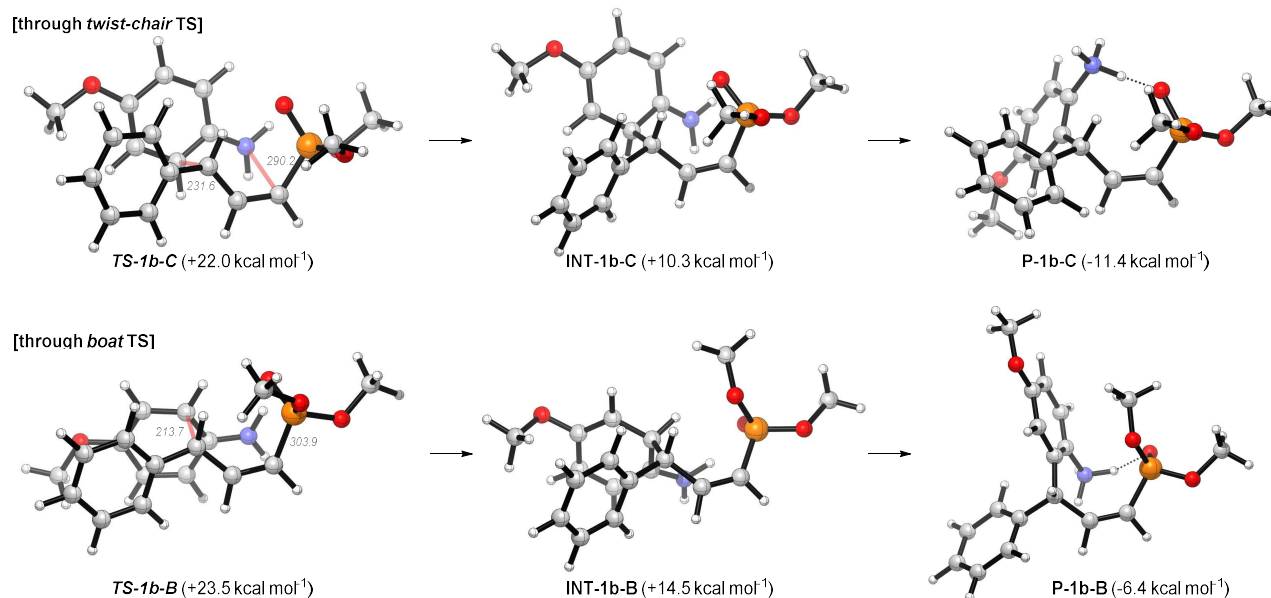

*TS-1b-C*

*TS-1b-B*

| Center Number | Atomic Number | Coordinates (Angstroms) |          |           | Center Number | Atomic Number | Coordinates (Angstroms) |           |           |
|---------------|---------------|-------------------------|----------|-----------|---------------|---------------|-------------------------|-----------|-----------|
|               |               | X                       | Y        | Z         |               |               | X                       | Y         | Z         |
| 1             | 6             | 2.072383                | 0.827043 | 1.321512  | 1             | 6             | 2.121415                | 0.057686  | 1.424294  |
| 2             | 1             | 2.702171                | 1.106002 | 2.164301  | 2             | 1             | 2.582995                | -0.144046 | 2.387378  |
| 3             | 6             | 0.743713                | 1.079883 | 1.391990  | 3             | 6             | 0.792044                | 0.270552  | 1.365228  |
| 4             | 1             | 0.369112                | 1.544726 | 2.301484  | 4             | 1             | 0.242258                | 0.182080  | 2.299049  |
| 5             | 6             | -0.204936               | 0.731817 | 0.365913  | 5             | 6             | 0.013272                | 0.622749  | 0.184059  |
| 6             | 1             | 0.215396                | 0.307154 | -0.541748 | 6             | 1             | 0.589545                | 1.008674  | -0.653567 |
| 7             | 6             | -1.491476               | 1.378133 | 0.196878  | 7             | 6             | -1.293025               | 1.256624  | 0.362952  |



|    |   |           |           |           |    |   |           |           |           |
|----|---|-----------|-----------|-----------|----|---|-----------|-----------|-----------|
| 8  | 6 | -2.120791 | 1.249014  | -1.054914 | 8  | 6 | -1.756715 | 2.129159  | -0.638646 |
| 9  | 6 | -2.146206 | 2.087315  | 1.222258  | 9  | 6 | -2.136898 | 0.966821  | 1.448197  |
| 10 | 6 | -3.367067 | 1.825961  | -1.284978 | 10 | 6 | -3.018177 | 2.699572  | -0.556420 |
| 11 | 1 | -1.615760 | 0.705017  | -1.848717 | 11 | 1 | -1.115439 | 2.352145  | -1.487980 |
| 12 | 6 | -3.389201 | 2.657291  | 0.990186  | 12 | 6 | -3.406274 | 1.538400  | 1.527221  |
| 13 | 1 | -1.689944 | 2.186640  | 2.201937  | 13 | 1 | -1.817806 | 0.288410  | 2.232314  |
| 14 | 6 | -4.001046 | 2.530118  | -0.263304 | 14 | 6 | -3.851045 | 2.398565  | 0.526381  |
| 15 | 1 | -3.839581 | 1.725389  | -2.256290 | 15 | 1 | -3.358881 | 3.374614  | -1.334254 |
| 16 | 1 | -3.888034 | 3.204820  | 1.782762  | 16 | 1 | -4.047338 | 1.306277  | 2.371574  |
| 17 | 1 | -4.972341 | 2.981876  | -0.437285 | 17 | 1 | -4.841201 | 2.838326  | 0.587923  |
| 18 | 6 | 0.147715  | -1.869195 | 0.657442  | 18 | 6 | -0.162276 | -2.026631 | -0.006465 |
| 19 | 6 | -0.918524 | -1.235584 | 1.357619  | 19 | 6 | -1.274838 | -2.388849 | 0.814039  |
| 20 | 6 | -0.105254 | -2.343697 | -0.672239 | 20 | 6 | -0.384561 | -1.070179 | -1.058214 |
| 21 | 6 | -2.252807 | -1.365548 | 0.899017  | 21 | 6 | -2.533191 | -1.998342 | 0.454029  |
| 22 | 1 | -0.750127 | -0.924476 | 2.384173  | 22 | 1 | -1.118346 | -3.009465 | 1.690494  |
| 23 | 6 | -1.378890 | -2.342551 | -1.151549 | 23 | 6 | -1.711921 | -0.854981 | -1.520581 |
| 24 | 1 | 0.719272  | -2.720328 | -1.267026 | 24 | 1 | 0.445814  | -0.893924 | -1.734119 |
| 25 | 6 | -2.480677 | -1.876405 | -0.356487 | 25 | 6 | -2.775369 | -1.247281 | -0.750942 |
| 26 | 1 | -3.053053 | -0.973546 | 1.513554  | 26 | 1 | -3.365622 | -2.291206 | 1.083866  |
| 27 | 1 | -1.597629 | -2.713714 | -2.147596 | 27 | 1 | -1.885867 | -0.269363 | -2.416071 |
| 28 | 8 | -3.682220 | -1.993795 | -0.948355 | 28 | 8 | -4.012832 | -0.908503 | -1.163227 |
| 29 | 6 | -4.813203 | -1.519594 | -0.225314 | 29 | 6 | -5.133400 | -1.280482 | -0.367441 |
| 30 | 1 | -4.702264 | -0.453004 | -0.001266 | 30 | 1 | -5.071145 | -0.827958 | 0.627717  |
| 31 | 1 | -5.671430 | -1.676063 | -0.875294 | 31 | 1 | -6.004856 | -0.889873 | -0.888878 |

|    |    |           |           |           |    |    |           |           |           |
|----|----|-----------|-----------|-----------|----|----|-----------|-----------|-----------|
| 32 | 1  | -4.940478 | -2.086267 | 0.702652  | 32 | 1  | -5.213779 | -2.368657 | -0.285566 |
| 33 | 15 | 2.987838  | 0.267889  | -0.121513 | 33 | 15 | 3.237519  | 0.117051  | 0.023847  |
| 34 | 8  | 4.078131  | -0.683392 | 0.550593  | 34 | 8  | 4.509130  | -0.628567 | 0.616447  |
| 35 | 8  | 3.885392  | 1.522116  | -0.555155 | 35 | 8  | 3.785398  | 1.610871  | -0.142107 |
| 36 | 8  | 2.184694  | -0.312504 | -1.230608 | 36 | 8  | 2.649045  | -0.448869 | -1.226555 |
| 37 | 6  | 5.197185  | -1.133670 | -0.244313 | 37 | 6  | 5.703666  | -0.733018 | -0.187968 |
| 38 | 1  | 5.738952  | -1.845274 | 0.374819  | 38 | 1  | 6.385124  | -1.372739 | 0.368059  |
| 39 | 1  | 4.840818  | -1.622887 | -1.153380 | 39 | 1  | 5.468026  | -1.184915 | -1.153482 |
| 40 | 1  | 5.836039  | -0.285153 | -0.493213 | 40 | 1  | 6.141194  | 0.257089  | -0.324662 |
| 41 | 6  | 3.319619  | 2.505056  | -1.442139 | 41 | 6  | 2.997909  | 2.598650  | -0.827868 |
| 42 | 1  | 3.005529  | 2.031432  | -2.373383 | 42 | 1  | 2.158880  | 2.909033  | -0.197704 |
| 43 | 1  | 2.468818  | 2.999793  | -0.964340 | 43 | 1  | 3.655479  | 3.448247  | -1.000141 |
| 44 | 1  | 4.107198  | 3.231195  | -1.632062 | 44 | 1  | 2.640113  | 2.203275  | -1.781313 |
| 45 | 1  | 1.500862  | -1.832767 | 2.198341  | 45 | 1  | 1.247776  | -3.141597 | 0.966945  |
| 46 | 1  | 2.120688  | -2.415107 | 0.699099  | 46 | 1  | 1.811875  | -2.244325 | -0.421316 |
| 47 | 7  | 1.360230  | -1.983457 | 1.209056  | 47 | 7  | 1.053044  | -2.510595 | 0.201346  |

E(RM062X) = -1396.16364934

Zero-point correction = 0.388604 (Hartree/Particle)

Sum of electronic and thermal Energies = -1395.750578

Sum of electronic and thermal Enthalpies = -1395.749633

Sum of electronic and thermal Free Energies = -1395.829788

E(RM062X) = -1396.16204068

Zero-point correction = 0.389116 (Hartree/Particle)

Sum of electronic and thermal Energies = -1395.748672

Sum of electronic and thermal Enthalpies = -1395.747728

Sum of electronic and thermal Free Energies = -1395.827395

**INT-1b-C**

**INT-1b-B**

| Center<br>Number | Atomic<br>Number | Coordinates (Angstroms) |           |           | Center<br>Number | Atomic<br>Number | Coordinates (Angstroms) |           |           |
|------------------|------------------|-------------------------|-----------|-----------|------------------|------------------|-------------------------|-----------|-----------|
|                  |                  | X                       | Y         | Z         |                  |                  | X                       | Y         | Z         |
| 1                | 6                | -1.993925               | -1.093720 | 1.222560  | 1                | 6                | 2.168091                | 1.260728  | 1.117922  |
| 2                | 1                | -2.637751               | -1.627808 | 1.917488  | 2                | 1                | 2.693466                | 1.761213  | 1.926808  |
| 3                | 6                | -0.674682               | -1.051775 | 1.446586  | 3                | 6                | 0.832406                | 1.318832  | 1.065486  |
| 4                | 1                | -0.304454               | -1.544734 | 2.346157  | 4                | 1                | 0.338025                | 1.887184  | 1.851047  |
| 5                | 6                | 0.386463                | -0.426456 | 0.578090  | 5                | 6                | -0.092957               | 0.752347  | 0.008107  |
| 6                | 1                | -0.023313               | -0.161150 | -0.399726 | 6                | 1                | 0.310596                | 1.033591  | -0.969807 |
| 7                | 6                | 1.528713                | -1.407615 | 0.377267  | 7                | 6                | -1.483457               | 1.347074  | 0.128531  |
| 8                | 6                | 1.886988                | -1.781385 | -0.919872 | 8                | 6                | -2.067227               | 1.960409  | -0.983829 |
| 9                | 6                | 2.244440                | -1.931575 | 1.458999  | 9                | 6                | -2.201924               | 1.299954  | 1.327275  |
| 10               | 6                | 2.942395                | -2.667327 | -1.136331 | 10               | 6                | -3.348979               | 2.502852  | -0.907483 |
| 11               | 1                | 1.342749                | -1.369138 | -1.765995 | 11               | 1                | -1.513605               | 2.015935  | -1.917958 |
| 12               | 6                | 3.302345                | -2.812443 | 1.244330  | 12               | 6                | -3.489064               | 1.829942  | 1.403982  |
| 13               | 1                | 1.989933                | -1.650874 | 2.478672  | 13               | 1                | -1.760686               | 0.851822  | 2.214975  |
| 14               | 6                | 3.652882                | -3.183864 | -0.054411 | 14               | 6                | -4.066915               | 2.430370  | 0.285384  |
| 15               | 1                | 3.209084                | -2.949882 | -2.149671 | 15               | 1                | -3.785197               | 2.979672  | -1.779466 |
| 16               | 1                | 3.852316                | -3.209213 | 2.091533  | 16               | 1                | -4.035686               | 1.782228  | 2.340329  |
| 17               | 1                | 4.475383                | -3.871885 | -0.220356 | 17               | 1                | -5.066152               | 2.849073  | 0.347266  |
| 18               | 6                | -0.175864               | 1.945690  | 1.131177  | 18               | 6                | -0.254850               | -1.519659 | 1.244837  |
| 19               | 6                | 0.934942                | 0.945414  | 1.202614  | 19               | 6                | -1.540803               | -1.977015 | 1.692982  |
| 20               | 6                | -0.206664               | 2.917127  | 0.074454  | 20               | 6                | -0.116854               | -0.859154 | -0.092511 |
| 21               | 6                | 2.165998                | 1.352881  | 0.452293  | 21               | 6                | -2.529932               | -2.113068 | 0.777300  |
| 22               | 1                | 1.180631                | 0.753237  | 2.254393  | 22               | 1                | -1.668869               | -2.298536 | 2.721061  |

|    |    |           |           |           |    |    |           |           |           |
|----|----|-----------|-----------|-----------|----|----|-----------|-----------|-----------|
| 23 | 6  | 0.902353  | 3.102411  | -0.673200 | 23 | 6  | -1.204439 | -1.218307 | -1.051598 |
| 24 | 1  | -1.104476 | 3.504623  | -0.080190 | 24 | 1  | 0.859075  | -1.141472 | -0.500235 |
| 25 | 6  | 2.127261  | 2.345233  | -0.456683 | 25 | 6  | -2.347562 | -1.777770 | -0.627988 |
| 26 | 1  | 3.051853  | 0.752668  | 0.615399  | 26 | 1  | -3.486972 | -2.531418 | 1.077570  |
| 27 | 1  | 0.917520  | 3.848910  | -1.461750 | 27 | 1  | -1.085886 | -0.927866 | -2.091807 |
| 28 | 8  | 3.141033  | 2.757131  | -1.246913 | 28 | 8  | -3.362679 | -2.081443 | -1.489475 |
| 29 | 6  | 4.364626  | 2.040454  | -1.140968 | 29 | 6  | -4.479602 | -1.192439 | -1.374910 |
| 30 | 1  | 4.209801  | 0.982641  | -1.380581 | 30 | 1  | -4.169643 | -0.168805 | -1.609445 |
| 31 | 1  | 5.041718  | 2.490956  | -1.863451 | 31 | 1  | -5.224141 | -1.537411 | -2.090566 |
| 32 | 1  | 4.779404  | 2.135527  | -0.132062 | 32 | 1  | -4.902958 | -1.220902 | -0.364454 |
| 33 | 15 | -2.819242 | -0.365644 | -0.193266 | 33 | 15 | 3.182616  | 0.245251  | 0.063319  |
| 34 | 8  | -4.270562 | -0.085997 | 0.398592  | 34 | 8  | 4.619895  | 0.904806  | 0.213999  |
| 35 | 8  | -3.118414 | -1.560846 | -1.221632 | 35 | 8  | 2.645912  | 0.534438  | -1.415716 |
| 36 | 8  | -2.107247 | 0.789591  | -0.805738 | 36 | 8  | 3.130720  | -1.214237 | 0.408482  |
| 37 | 6  | -5.297532 | 0.420106  | -0.479463 | 37 | 6  | 5.788093  | 0.200788  | -0.258282 |
| 38 | 1  | -6.155582 | 0.636875  | 0.153096  | 38 | 1  | 6.645223  | 0.762140  | 0.106293  |
| 39 | 1  | -4.955073 | 1.332059  | -0.972831 | 39 | 1  | 5.799599  | -0.813907 | 0.142760  |
| 40 | 1  | -5.556799 | -0.339454 | -1.218885 | 40 | 1  | 5.795164  | 0.182061  | -1.350146 |
| 41 | 6  | -2.035605 | -2.039568 | -2.036602 | 41 | 6  | 2.758888  | -0.431461 | -2.481752 |
| 42 | 1  | -1.616833 | -1.221584 | -2.627029 | 42 | 1  | 1.860955  | -0.327073 | -3.090670 |
| 43 | 1  | -1.260884 | -2.489701 | -1.405998 | 43 | 1  | 3.641819  | -0.202106 | -3.079322 |
| 44 | 1  | -2.455966 | -2.799427 | -2.692156 | 44 | 1  | 2.826218  | -1.443114 | -2.075747 |
| 45 | 1  | -1.137249 | 1.242383  | 2.777107  | 45 | 1  | 0.749757  | -2.104970 | 2.894300  |
| 46 | 1  | -1.941138 | 2.520430  | 1.935240  | 46 | 1  | 1.750998  | -1.501951 | 1.583242  |

|                                                            |   |           |          |          |                                                            |   |          |           |          |
|------------------------------------------------------------|---|-----------|----------|----------|------------------------------------------------------------|---|----------|-----------|----------|
| 47                                                         | 7 | -1.135984 | 1.908054 | 2.012873 | 47                                                         | 7 | 0.812879 | -1.683380 | 1.973448 |
| E(RM062X) = -1396.18462710                                 |   |           |          |          | E(RM062X) = -1396.17829086                                 |   |          |           |          |
| Zero-point correction = 0.391376 (Hartree/Particle)        |   |           |          |          | Zero-point correction = 0.390920 (Hartree/Particle)        |   |          |           |          |
| Sum of electronic and thermal Energies = -1395.768850      |   |           |          |          | Sum of electronic and thermal Energies = -1395.763027      |   |          |           |          |
| Sum of electronic and thermal Enthalpies = -1395.767906    |   |           |          |          | Sum of electronic and thermal Enthalpies = -1395.762083    |   |          |           |          |
| Sum of electronic and thermal Free Energies = -1395.848381 |   |           |          |          | Sum of electronic and thermal Free Energies = -1395.841791 |   |          |           |          |

| P-1b-C        |               |                         |           |           | P-1b-B        |               |                         |          |           |
|---------------|---------------|-------------------------|-----------|-----------|---------------|---------------|-------------------------|----------|-----------|
| Center Number | Atomic Number | Coordinates (Angstroms) |           |           | Center Number | Atomic Number | Coordinates (Angstroms) |          |           |
|               |               | X                       | Y         | Z         |               |               | X                       | Y        | Z         |
| 1             | 6             | -1.325018               | -0.824920 | 1.773472  | 1             | 6             | 2.116130                | 1.550537 | 0.414809  |
| 2             | 1             | -1.471849               | -1.079284 | 2.819988  | 2             | 1             | 2.905884                | 2.192942 | 0.797768  |
| 3             | 6             | -0.087209               | -0.653856 | 1.298549  | 3             | 6             | 0.867599                | 2.031757 | 0.422443  |
| 4             | 1             | 0.740240                | -0.763256 | 2.000090  | 4             | 1             | 0.767495                | 3.047414 | 0.802521  |
| 5             | 6             | 0.322030                | -0.291521 | -0.112261 | 5             | 6             | -0.452995               | 1.476379 | -0.093424 |
| 6             | 1             | -0.552743               | -0.369386 | -0.764264 | 6             | 1             | -0.451262               | 1.760015 | -1.155287 |
| 7             | 6             | 1.372325                | -1.246662 | -0.676944 | 7             | 6             | -1.613575               | 2.257396 | 0.544858  |
| 8             | 6             | 2.107911                | -0.867869 | -1.806041 | 8             | 6             | -1.732798               | 3.620303 | 0.242885  |
| 9             | 6             | 1.573543                | -2.517263 | -0.134034 | 9             | 6             | -2.542777               | 1.679736 | 1.411823  |
| 10            | 6             | 3.028809                | -1.740371 | -2.378103 | 10            | 6             | -2.746377               | 4.390076 | 0.804136  |
| 11            | 1             | 1.960768                | 0.120190  | -2.236323 | 11            | 1             | -1.030477               | 4.082254 | -0.447525 |
| 12            | 6             | 2.501727                | -3.391890 | -0.703987 | 12            | 6             | -3.558487               | 2.452915 | 1.980610  |
| 13            | 1             | 1.007923                | -2.837955 | 0.736604  | 13            | 1             | -2.508067               | 0.617600 | 1.636330  |

|    |    |           |           |           |    |    |           |           |           |
|----|----|-----------|-----------|-----------|----|----|-----------|-----------|-----------|
| 14 | 6  | 3.231229  | -3.006530 | -1.825159 | 14 | 6  | -3.662358 | 3.807707  | 1.682432  |
| 15 | 1  | 3.591730  | -1.431380 | -3.253063 | 15 | 1  | -2.825178 | 5.442426  | 0.551090  |
| 16 | 1  | 2.650307  | -4.374167 | -0.267107 | 16 | 1  | -4.272569 | 1.985519  | 2.651017  |
| 17 | 1  | 3.953141  | -3.685556 | -2.266957 | 17 | 1  | -4.455014 | 4.405254  | 2.120461  |
| 18 | 6  | 0.112227  | 2.200155  | -0.687310 | 18 | 6  | -0.512891 | -0.879114 | 1.011386  |
| 19 | 6  | 0.809480  | 1.155228  | -0.090454 | 19 | 6  | -0.912946 | -2.207298 | 0.981373  |
| 20 | 6  | 0.569318  | 3.516486  | -0.609846 | 20 | 6  | -0.714648 | -0.022546 | -0.078680 |
| 21 | 6  | 1.997123  | 1.453261  | 0.590201  | 21 | 6  | -1.551607 | -2.731381 | -0.137457 |
| 22 | 1  | -1.611591 | 2.812160  | -1.636191 | 22 | 1  | -0.724652 | -2.849392 | 1.837043  |
| 23 | 6  | 1.734860  | 3.804368  | 0.073924  | 23 | 6  | -1.347481 | -0.563648 | -1.194623 |
| 24 | 1  | 0.012857  | 4.316728  | -1.088780 | 24 | 1  | 1.234471  | -0.674389 | 2.041659  |
| 25 | 6  | 2.460477  | 2.765946  | 0.677247  | 25 | 6  | -1.764968 | -1.898810 | -1.240076 |
| 26 | 1  | 2.556771  | 0.636964  | 1.033754  | 26 | 1  | -1.860204 | -3.768640 | -0.136795 |
| 27 | 1  | 2.106564  | 4.819922  | 0.147716  | 27 | 1  | -1.539165 | 0.059323  | -2.063151 |
| 28 | 8  | 3.592276  | 3.130745  | 1.314279  | 28 | 8  | -2.355370 | -2.290486 | -2.387290 |
| 29 | 6  | 4.370503  | 2.114851  | 1.935226  | 29 | 6  | -2.817213 | -3.634044 | -2.475785 |
| 30 | 1  | 4.721743  | 1.387377  | 1.196496  | 30 | 1  | -3.571780 | -3.835981 | -1.709204 |
| 31 | 1  | 5.222149  | 2.624260  | 2.381362  | 31 | 1  | -3.262982 | -3.729863 | -3.463571 |
| 32 | 1  | 3.794951  | 1.607063  | 2.715640  | 32 | 1  | -1.985209 | -4.338172 | -2.376727 |
| 33 | 15 | -2.825380 | -0.701257 | 0.815850  | 33 | 15 | 2.712311  | -0.066173 | -0.043810 |
| 34 | 8  | -3.917270 | -0.419045 | 1.924375  | 34 | 8  | 4.244819  | 0.254041  | -0.326571 |
| 35 | 8  | -3.223709 | -2.161075 | 0.301045  | 35 | 8  | 2.050671  | -0.440590 | -1.445438 |
| 36 | 8  | -2.787219 | 0.289170  | -0.315146 | 36 | 8  | 2.493808  | -1.118104 | 1.007886  |
| 37 | 6  | -5.304399 | -0.285006 | 1.540981  | 37 | 6  | 5.118922  | -0.816806 | -0.737516 |

|                                                            |   |           |           |           |                                                            |   |           |           |           |
|------------------------------------------------------------|---|-----------|-----------|-----------|------------------------------------------------------------|---|-----------|-----------|-----------|
| 38                                                         | 1 | -5.837443 | -0.002350 | 2.445542  | 38                                                         | 1 | 6.129350  | -0.416392 | -0.698398 |
| 39                                                         | 1 | -5.407612 | 0.493742  | 0.783316  | 39                                                         | 1 | 5.024954  | -1.663982 | -0.054751 |
| 40                                                         | 1 | -5.674825 | -1.239991 | 1.165415  | 40                                                         | 1 | 4.878431  | -1.115689 | -1.760407 |
| 41                                                         | 6 | -2.501177 | -2.724138 | -0.808723 | 41                                                         | 6 | 1.697546  | -1.804124 | -1.759956 |
| 42                                                         | 1 | -2.606432 | -2.085953 | -1.688560 | 42                                                         | 1 | 1.034590  | -1.751951 | -2.621795 |
| 43                                                         | 1 | -1.444048 | -2.846737 | -0.548755 | 43                                                         | 1 | 2.595772  | -2.371587 | -2.011343 |
| 44                                                         | 1 | -2.943405 | -3.699771 | -0.997547 | 44                                                         | 1 | 1.186519  | -2.264628 | -0.911911 |
| 45                                                         | 1 | -1.803546 | 1.286842  | -0.938480 | 45                                                         | 1 | -0.115210 | -0.919134 | 3.048541  |
| 46                                                         | 1 | -0.910910 | 1.519235  | -2.365108 | 46                                                         | 1 | 0.132681  | 0.569745  | 2.384318  |
| 47                                                         | 7 | -1.115760 | 1.936793  | -1.451482 | 47                                                         | 7 | 0.215893  | -0.435810 | 2.209467  |
| E(RM062X) = -1396.22156014                                 |   |           |           |           | E(RM062X) = -1396.21104617                                 |   |           |           |           |
| Zero-point correction = 0.392797 (Hartree/Particle)        |   |           |           |           | Zero-point correction = 0.392337 (Hartree/Particle)        |   |           |           |           |
| Sum of electronic and thermal Energies = -1395.804823      |   |           |           |           | Sum of electronic and thermal Energies = -1395.794586      |   |           |           |           |
| Sum of electronic and thermal Enthalpies = -1395.803879    |   |           |           |           | Sum of electronic and thermal Enthalpies = -1395.793642    |   |           |           |           |
| Sum of electronic and thermal Free Energies = -1395.883027 |   |           |           |           | Sum of electronic and thermal Free Energies = -1395.875117 |   |           |           |           |

## References

---

- i. For *Gaussian 09*, Revision D.01, M. J. Frisch, G. W. Trucks, H. B. Schlegel, G. E. Scuseria, M. A. Robb, J. R. Cheeseman, G. Scalmani, V. Barone, B. Mennucci, G. A. Petersson, H. Nakatsuji, M. Caricato, X. Li, H. P. Hratchian, A. F. Izmaylov, J. Bloino, G. Zheng, J. L. Sonnenberg, M. Hada, M. Ehara, K. Toyota, R. Fukuda, J. Hasegawa, M. Ishida, T. Nakajima, Y. Honda, O. Kitao, H. Nakai, T. Vreven, J. A. Montgomery, Jr., J. E. Peralta, F. Ogliaro, M. Bearpark, J. J. Heyd, E. Brothers, K. N. Kudin, V. N. Staroverov, T. Keith, R. Kobayashi, J. Normand, K. Raghavachari, A. Rendell, J. C. Burant, S. S. Iyengar, J. Tomasi, M. Cossi, N. Rega, J. M. Millam, M. Klene, J. E. Knox, J. B. Cross, V. Bakken, C. Adamo, J. Jaramillo, R. Gomperts, R. E. Stratmann, O. Yazyev, A. J. Austin, R. Cammi, C. Pomelli, J. W. Ochterski, R. L. Martin, K. Morokuma, V. G. Zakrzewski, G. A. Voth, P. Salvador, J. J. Dannenberg, S. Dapprich, A. D. Daniels, O. Farkas, J. B. Foresman, J. V. Ortiz, J. Cioslowski, D. J. Fox, Gaussian, Inc., Wallingford CT, 2013.
- ii. Y. Zhao, D. G. Truhlar, *Theor. Chem. Acc.* **2008**, *120*: 215.
